# Supplementary material for: Mangrove Tirucallane- and Apotirucallane-Type Triterpenoids: Structure Diversity of the C-17 Side-Chain and Natural Agonists of Human Farnesoid/Pregnane–X–Receptor
Source: MDPI journal article supplement (doi:10.3390/md16120488), 2018-12-06

# Supporting Information

Copies of HR-ESIMS of **1–10**, **4s/r**, **6s/r**, and **7s/r**; 1D and 2D NMR spectra of **1–10**; and <sup>1</sup>H NMR spectra of **4s/r**, **6s/r**, and **7s/r**.

## Table of Contents:

|                                                                                                            |         |
|------------------------------------------------------------------------------------------------------------|---------|
| 1. HR-ESIMS for compound <b>1</b> .....                                                                    | S6-S7   |
| 2. <sup>1</sup> H NMR (400 MHz) spectrum of compound <b>1</b> in CDCl <sub>3</sub> .....                   | S8-S10  |
| 3. <sup>13</sup> C NMR (100 MHz) spectrum of compound <b>1</b> in CDCl <sub>3</sub> .....                  | S11-S13 |
| 4. DEPT135 (100 MHz) spectrum of compound <b>1</b> in CDCl <sub>3</sub> .....                              | S14-S15 |
| 5. <sup>1</sup> H- <sup>1</sup> H COSY (400 MHz) spectrum of compound <b>1</b> in CDCl <sub>3</sub> .....  | S16-S18 |
| 6. HSQC (400 MHz) spectrum of compound <b>1</b> in CDCl <sub>3</sub> .....                                 | S19-S21 |
| 7. HMBC (400 MHz) spectrum of compound <b>1</b> in CDCl <sub>3</sub> .....                                 | S22-S27 |
| 8. NOESY (400 MHz) spectrum of compound <b>1</b> in CDCl <sub>3</sub> .....                                | S28-S32 |
| 9. HR-ESIMS for compound <b>2</b> .....                                                                    | S33     |
| 10. <sup>1</sup> H NMR (400 MHz) spectrum of compound <b>2</b> in CDCl <sub>3</sub> .....                  | S34-S36 |
| 11. <sup>13</sup> C NMR (100 MHz) spectrum of compound <b>2</b> in CDCl <sub>3</sub> .....                 | S37-S39 |
| 12. DEPT135 (100 MHz) spectrum of compound <b>2</b> in CDCl <sub>3</sub> .....                             | S40-S41 |
| 13. <sup>1</sup> H- <sup>1</sup> H COSY (400 MHz) spectrum of compound <b>2</b> in CDCl <sub>3</sub> ..... | S42-S44 |
| 14. HSQC (400 MHz) spectrum of compound <b>2</b> in CDCl <sub>3</sub> .....                                | S45-S46 |
| 15. HMBC (400 MHz) spectrum of compound <b>2</b> in CDCl <sub>3</sub> .....                                | S47-S52 |
| 16. NOESY (400 MHz) spectrum of compound <b>2</b> in CDCl <sub>3</sub> .....                               | S53-S58 |
| 17. HR-ESIMS for compound <b>3</b> .....                                                                   | S59     |
| 18. <sup>1</sup> H NMR (400 MHz) spectrum of compound <b>3</b> in CDCl <sub>3</sub> .....                  | S60-S62 |
| 19. <sup>13</sup> C NMR (100 MHz) spectrum of compound <b>3</b> in CDCl <sub>3</sub> .....                 | S63-S64 |
| 20. DEPT135 (100 MHz) spectrum of compound <b>3</b> in CDCl <sub>3</sub> .....                             | S65-S66 |
| 21. <sup>1</sup> H- <sup>1</sup> H COSY (400 MHz) spectrum of compound <b>3</b> in CDCl <sub>3</sub> ..... | S67-S69 |
| 22. HSQC (400 MHz) spectrum of compound <b>3</b> in CDCl <sub>3</sub> .....                                | S70-S71 |
| 23. HMBC (400 MHz) spectrum of compound <b>3</b> in CDCl <sub>3</sub> .....                                | S72-S77 |
| 24. NOESY (400 MHz) spectrum of compound <b>3</b> in CDCl <sub>3</sub> .....                               | S78-S82 |



## Table of Contents:

|                                                                                                            |           |
|------------------------------------------------------------------------------------------------------------|-----------|
| 25. HR-ESIMS for compound <b>4</b> .....                                                                   | S83-S84   |
| 26. <sup>1</sup> H NMR (400 MHz) spectrum of compound <b>4</b> in CDCl <sub>3</sub> .....                  | S85-S87   |
| 27. <sup>13</sup> C NMR (100 MHz) spectrum of compound <b>4</b> in CDCl <sub>3</sub> .....                 | S88-S90   |
| 28. DEPT135 (100 MHz) spectrum of compound <b>4</b> in CDCl <sub>3</sub> .....                             | S91-S94   |
| 29. <sup>1</sup> H- <sup>1</sup> H COSY (400 MHz) spectrum of compound <b>4</b> in CDCl <sub>3</sub> ..... | S95-S97   |
| 30. HSQC (400 MHz) spectrum of compound <b>4</b> in CDCl <sub>3</sub> .....                                | S98-S100  |
| 31. HMBC (400 MHz) spectrum of compound <b>4</b> in CDCl <sub>3</sub> .....                                | S101-S106 |
| 32. NOESY (400 MHz) spectrum of compound <b>4</b> in CDCl <sub>3</sub> .....                               | S107-S110 |
| 33. HR-ESIMS for compound <b>5</b> .....                                                                   | S111-S112 |
| 34. <sup>1</sup> H NMR (400 MHz) spectrum of compound <b>5</b> in CDCl <sub>3</sub> .....                  | S113-S115 |
| 35. <sup>13</sup> C NMR (100 MHz) spectrum of compound <b>5</b> in CDCl <sub>3</sub> .....                 | S116-S118 |
| 36. DEPT135 (100 MHz) spectrum of compound <b>5</b> in CDCl <sub>3</sub> .....                             | S119-S121 |
| 37. <sup>1</sup> H- <sup>1</sup> H COSY (400 MHz) spectrum of compound <b>5</b> in CDCl <sub>3</sub> ..... | S122-S124 |
| 38. HSQC (400 MHz) spectrum of compound <b>5</b> in CDCl <sub>3</sub> .....                                | S125-S127 |
| 39. HMBC (400 MHz) spectrum of compound <b>5</b> in CDCl <sub>3</sub> .....                                | S128-S133 |
| 40. NOESY (400 MHz) spectrum of compound <b>5</b> in CDCl <sub>3</sub> .....                               | S134-S137 |
| 41. HR-ESIMS for compound <b>6</b> .....                                                                   | S138-S139 |
| 42. <sup>1</sup> H NMR (400 MHz) spectrum of compound <b>6</b> in CDCl <sub>3</sub> .....                  | S140-S142 |
| 43. <sup>13</sup> C NMR (100 MHz) spectrum of compound <b>6</b> in CDCl <sub>3</sub> .....                 | S143-S146 |
| 44. DEPT135 (100 MHz) spectrum of compound <b>6</b> in CDCl <sub>3</sub> .....                             | S147-S148 |
| 45. <sup>1</sup> H- <sup>1</sup> H COSY (400 MHz) spectrum of compound <b>6</b> in CDCl <sub>3</sub> ..... | S149-S152 |
| 46. HSQC (400 MHz) spectrum of compound <b>6</b> in CDCl <sub>3</sub> .....                                | S153-S156 |
| 47. HMBC (400 MHz) spectrum of compound <b>6</b> in CDCl <sub>3</sub> .....                                | S157-S164 |
| 48. NOESY (400 MHz) spectrum of compound <b>6</b> in CDCl <sub>3</sub> .....                               | S165-S168 |

## Table of Contents:

|                                                                                                            |           |
|------------------------------------------------------------------------------------------------------------|-----------|
| 49. HR-ESIMS for compound <b>7</b> .....                                                                   | S169-S170 |
| 50. <sup>1</sup> H NMR (400 MHz) spectrum of compound <b>7</b> in CDCl <sub>3</sub> .....                  | S171-S173 |
| 51. <sup>13</sup> C NMR (100 MHz) spectrum of compound <b>7</b> in CDCl <sub>3</sub> .....                 | S174-S175 |
| 52. DEPT135 (100 MHz) spectrum of compound <b>7</b> in CDCl <sub>3</sub> .....                             | S176-S177 |
| 53. <sup>1</sup> H- <sup>1</sup> H COSY (400 MHz) spectrum of compound <b>7</b> in CDCl <sub>3</sub> ..... | S178-S180 |
| 54. HSQC (400 MHz) spectrum of compound <b>7</b> in CDCl <sub>3</sub> .....                                | S181-S183 |
| 55. HMBC (400 MHz) spectrum of compound <b>7</b> in CDCl <sub>3</sub> .....                                | S184-S189 |
| 56. NOESY (400 MHz) spectrum of compound <b>7</b> in CDCl <sub>3</sub> .....                               | S190-S193 |
| 57. HR-ESIMS for compound <b>8</b> .....                                                                   | S194      |
| 58. <sup>1</sup> H NMR (400 MHz) spectrum of compound <b>8</b> in CDCl <sub>3</sub> .....                  | S195-S197 |
| 59. <sup>13</sup> C NMR (100 MHz) spectrum of compound <b>8</b> in CDCl <sub>3</sub> .....                 | S198-S200 |
| 60. DEPT135 (100 MHz) spectrum of compound <b>8</b> in CDCl <sub>3</sub> .....                             | S201-S202 |
| 61. <sup>1</sup> H- <sup>1</sup> H COSY (400 MHz) spectrum of compound <b>8</b> in CDCl <sub>3</sub> ..... | S203-S206 |
| 62. HSQC (400 MHz) spectrum of compound <b>8</b> in CDCl <sub>3</sub> .....                                | S207-S210 |
| 63. HMBC (400 MHz) spectrum of compound <b>8</b> in CDCl <sub>3</sub> .....                                | S211-S217 |
| 64. NOESY (400 MHz) spectrum of compound <b>8</b> in CDCl <sub>3</sub> .....                               | S218-S222 |
| 65. HR-ESIMS for compound <b>9</b> .....                                                                   | S223-S224 |
| 66. <sup>1</sup> H NMR (400 MHz) spectrum of compound <b>9</b> in CDCl <sub>3</sub> .....                  | S225-S227 |
| 67. <sup>13</sup> C NMR (100 MHz) spectrum of compound <b>9</b> in CDCl <sub>3</sub> .....                 | S228-S231 |
| 68. DEPT135 (100 MHz) spectrum of compound <b>9</b> in CDCl <sub>3</sub> .....                             | S232-S233 |
| 69. <sup>1</sup> H- <sup>1</sup> H COSY (400 MHz) spectrum of compound <b>9</b> in CDCl <sub>3</sub> ..... | S234-S237 |
| 70. HSQC (400 MHz) spectrum of compound <b>9</b> in CDCl <sub>3</sub> .....                                | S238-S240 |
| 71. HMBC (400 MHz) spectrum of compound <b>9</b> in CDCl <sub>3</sub> .....                                | S241-S246 |
| 72. NOESY (400 MHz) spectrum of compound <b>9</b> in CDCl <sub>3</sub> .....                               | S247-S250 |

## Table of Contents:

|                                                                                                             |            |
|-------------------------------------------------------------------------------------------------------------|------------|
| 73. HR-ESIMS for compound <b>10</b> .....                                                                   | S251       |
| 74. <sup>1</sup> H NMR (400 MHz) spectrum of compound <b>10</b> in CDCl <sub>3</sub> .....                  | S252-S254  |
| 75. <sup>13</sup> C NMR (100 MHz) spectrum of compound <b>10</b> in CDCl <sub>3</sub> .....                 | S245-S258  |
| 76. DEPT135 (100 MHz) spectrum of compound <b>10</b> in CDCl <sub>3</sub> .....                             | S259-S261  |
| 77. <sup>1</sup> H- <sup>1</sup> H COSY (400 MHz) spectrum of compound <b>10</b> in CDCl <sub>3</sub> ..... | S262-S264  |
| 78. HSQC (400 MHz) spectrum of compound <b>10</b> in CDCl <sub>3</sub> .....                                | S265-S267  |
| 79. HMBC (400 MHz) spectrum of compound <b>10</b> in CDCl <sub>3</sub> .....                                | S268-S274  |
| 80. NOESY (400 MHz) spectrum of compound <b>10</b> in CDCl <sub>3</sub> .....                               | S275-S279  |
| 81. HR-ESIMS for compound <b>4s</b> .....                                                                   | S280-S281  |
| 82. <sup>1</sup> H NMR (400 MHz) spectrum of compound <b>4s</b> in CDCl <sub>3</sub> .....                  | S282-S284  |
| 83. HR-ESIMS for compound <b>4r</b> .....                                                                   | S285-S286  |
| 84. <sup>1</sup> H NMR (400 MHz) spectrum of compound <b>4r</b> in CDCl <sub>3</sub> .....                  | S287-S289  |
| 85. HR-ESIMS for compound <b>6s</b> .....                                                                   | S290       |
| 86. <sup>1</sup> H NMR (400 MHz) spectrum of compound <b>6s</b> in CDCl <sub>3</sub> .....                  | S291-S293  |
| 87. HR-ESIMS for compound <b>6r</b> .....                                                                   | S294       |
| 88. <sup>1</sup> H NMR (400 MHz) spectrum of compound <b>6r</b> in CDCl <sub>3</sub> .....                  | S295-S297  |
| 89. HR-ESIMS for compound <b>7s</b> .....                                                                   | S298       |
| 90. <sup>1</sup> H NMR (400 MHz) spectrum of compound <b>7s</b> in CDCl <sub>3</sub> .....                  | S299-S2301 |
| 91. HR-ESIMS for compound <b>7r</b> .....                                                                   | S302       |
| 92. <sup>1</sup> H NMR (400 MHz) spectrum of compound <b>7r</b> in CDCl <sub>3</sub> .....                  | S303-S305  |

# HR-ESIMS for compound 1

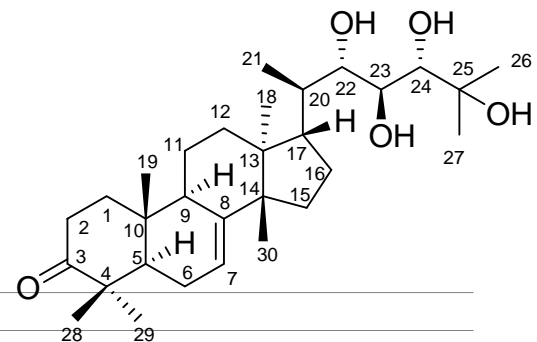

## Generic Display Report

### Analysis Info

Analysis Name D:\Data\MS\data\201804\jiangzhongping\_XG-52-3\_neg\_50\_01\_4495.d  
Method LC\_Direct Infusion\_neg\_100-1000mz.m  
Sample Name jiangzhongping\_XG-52-3\_neg  
Comment

Acquisition Date 4/3/2018 10:52:52 AM

Operator SCSIO  
Instrument maXis

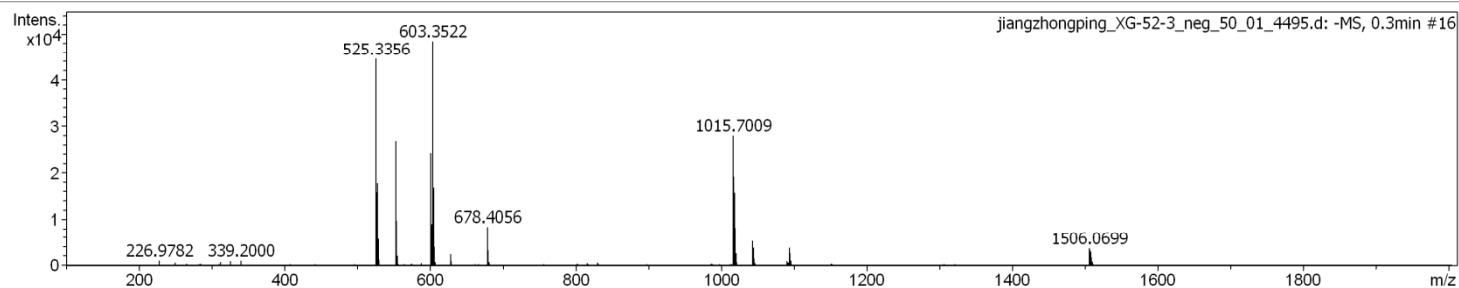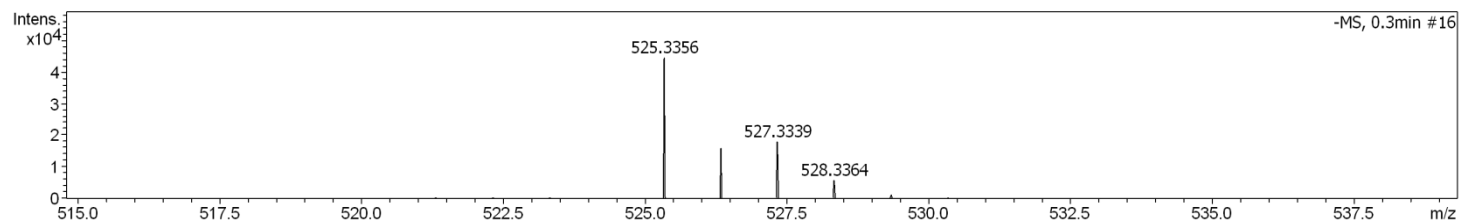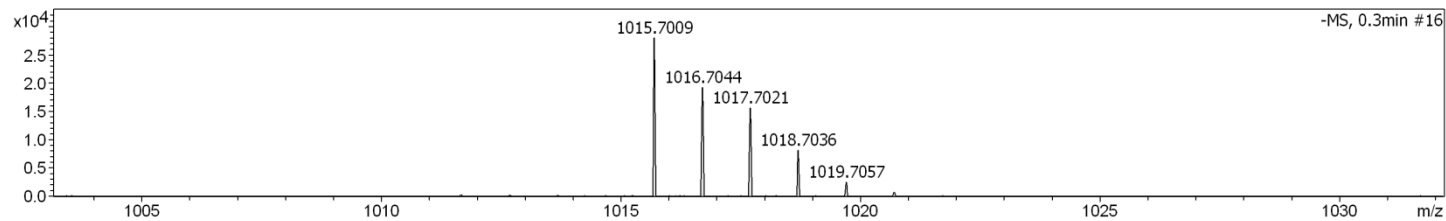

# HR-ESIMS for compound 1

## Mass Spectrum SmartFormula Report

### Analysis Info

Analysis Name D:\Data\MS\data\201804\jiangzhongping\_XG-52-3\_neg\_50\_01\_4495.d  
Method LC\_Direct Infusion\_neg\_100-1000mz.m  
Sample Name jiangzhongping\_XG-52-3\_neg  
Comment

Acquisition Date 4/3/2018 10:52:52 AM  
Operator SCSIO  
Instrument maXis 255552.00029

### Acquisition Parameter

|             |          |                      |          |                  |           |
|-------------|----------|----------------------|----------|------------------|-----------|
| Source Type | ESI      | Ion Polarity         | Negative | Set Nebulizer    | 0.4 Bar   |
| Focus       | Active   | Set Capillary        | 4000 V   | Set Dry Heater   | 180 °C    |
| Scan Begin  | 100 m/z  | Set End Plate Offset | -500 V   | Set Dry Gas      | 4.0 l/min |
| Scan End    | 2000 m/z | Set Charging Voltage | 0 V      | Set Divert Valve | Waste     |
|             |          | Set Corona           | 0 nA     | Set APCI Heater  | 0 °C      |

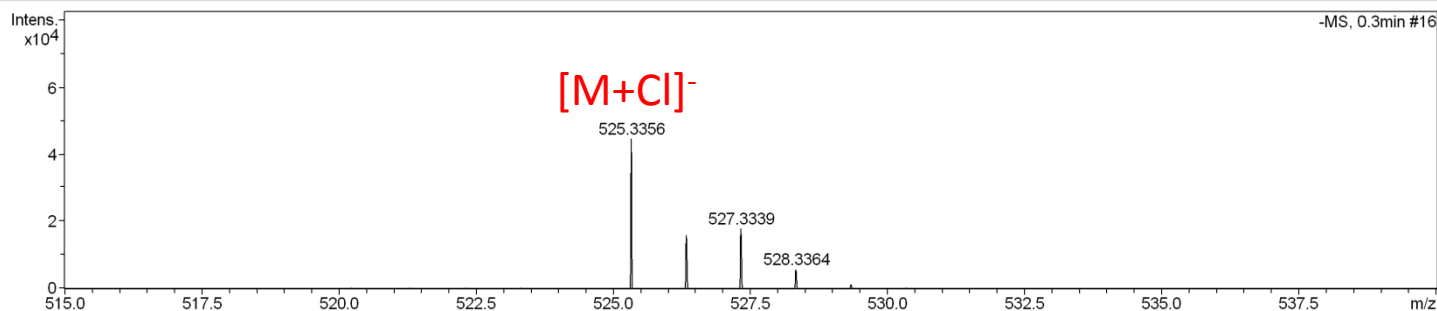

| Meas. m/z | # | Ion Formula  | Score  | m/z       | err [ppm] | err [mDa] | mSigma | rdb  | e <sup>-</sup> Conf | N-Rule |
|-----------|---|--------------|--------|-----------|-----------|-----------|--------|------|---------------------|--------|
| 525.3356  | 1 | C30H50ClO5   | 100.00 | 525.3352  | -0.8      | -0.4      | 14.0   | 5.5  | even                | ok     |
| 1015.7009 | 1 | C60H100ClO10 | 100.00 | 1015.7011 | 0.1       | 0.1       | 10.4   | 10.5 | even                | ok     |

jiangzhongping\_XG-52-3\_neg\_50\_01\_4495.d  
Bruker Compass DataAnalysis 4.1

printed: 4/4/2018 8:24:30 AM

by: SCSIO

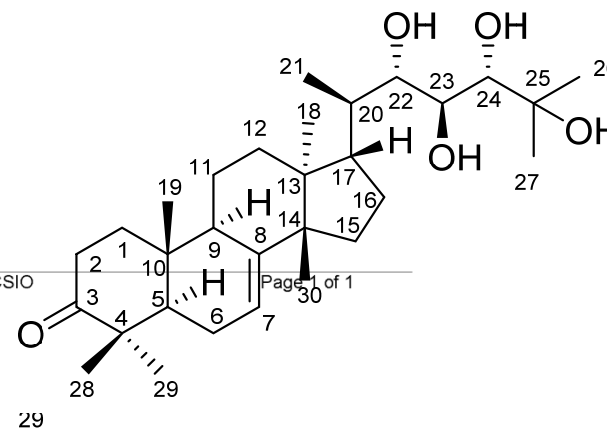

# $^1\text{H}$ NMR (400 MHz) spectrum of compound **1** in $\text{CDCl}_3$

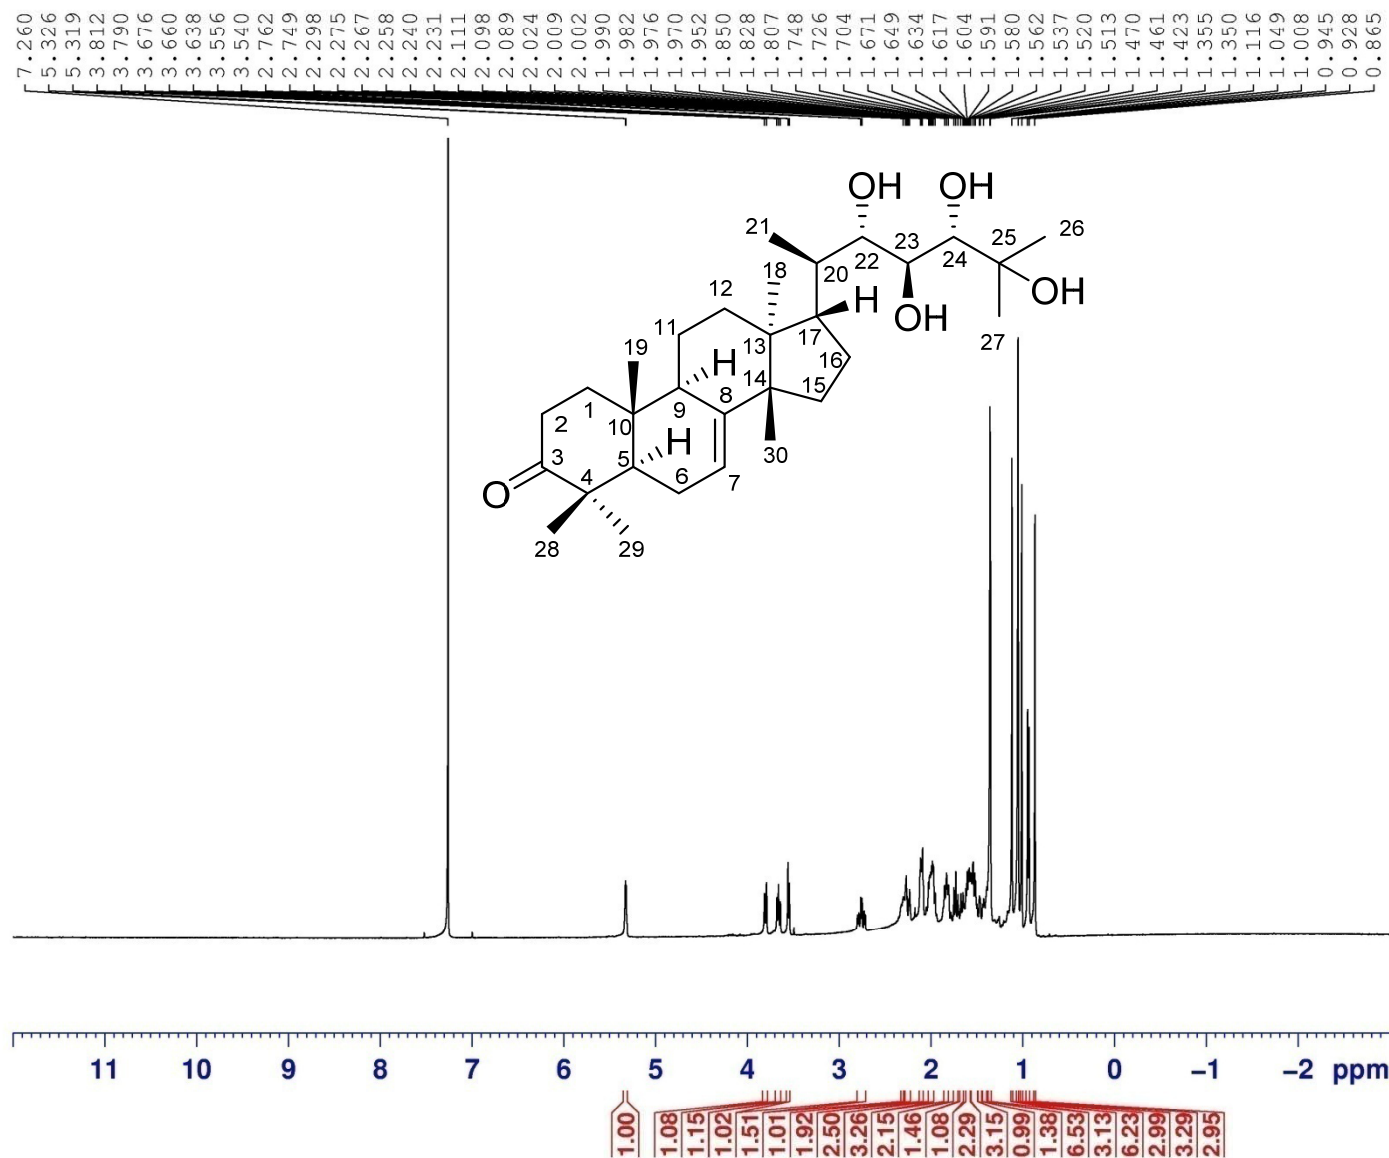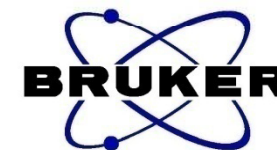

```

NAME          XG-52-3
EXPNO          1
PROCNO         1
Date_         20171226
Time          16.56
INSTRUM        spect
PROBHD         5 mm CPPBBO BB
PULPROG        zg30
TD             65536
SOLVENT        CDCl3
NS             16
DS             2
SWH            8223.685 Hz
FIDRES         0.125483 Hz
AQ             3.9846387 sec
RG             208.5
DW             60.800 usec
DE             10.00 usec
TE             297.0 K
D1             1.00000000 sec
TD0            1

===== CHANNEL f1 =====
SF01          400.1324710 MHz
NUC1           1H
P1             11.50 usec
SI             65536
SF             400.1300096 MHz
WDW            EM
SSB            0
LB             0.30 Hz
GB             0
PC             1.00
    
```

$^1\text{H}$  NMR (400 MHz) spectrum of compound **1** in  $\text{CDCl}_3$

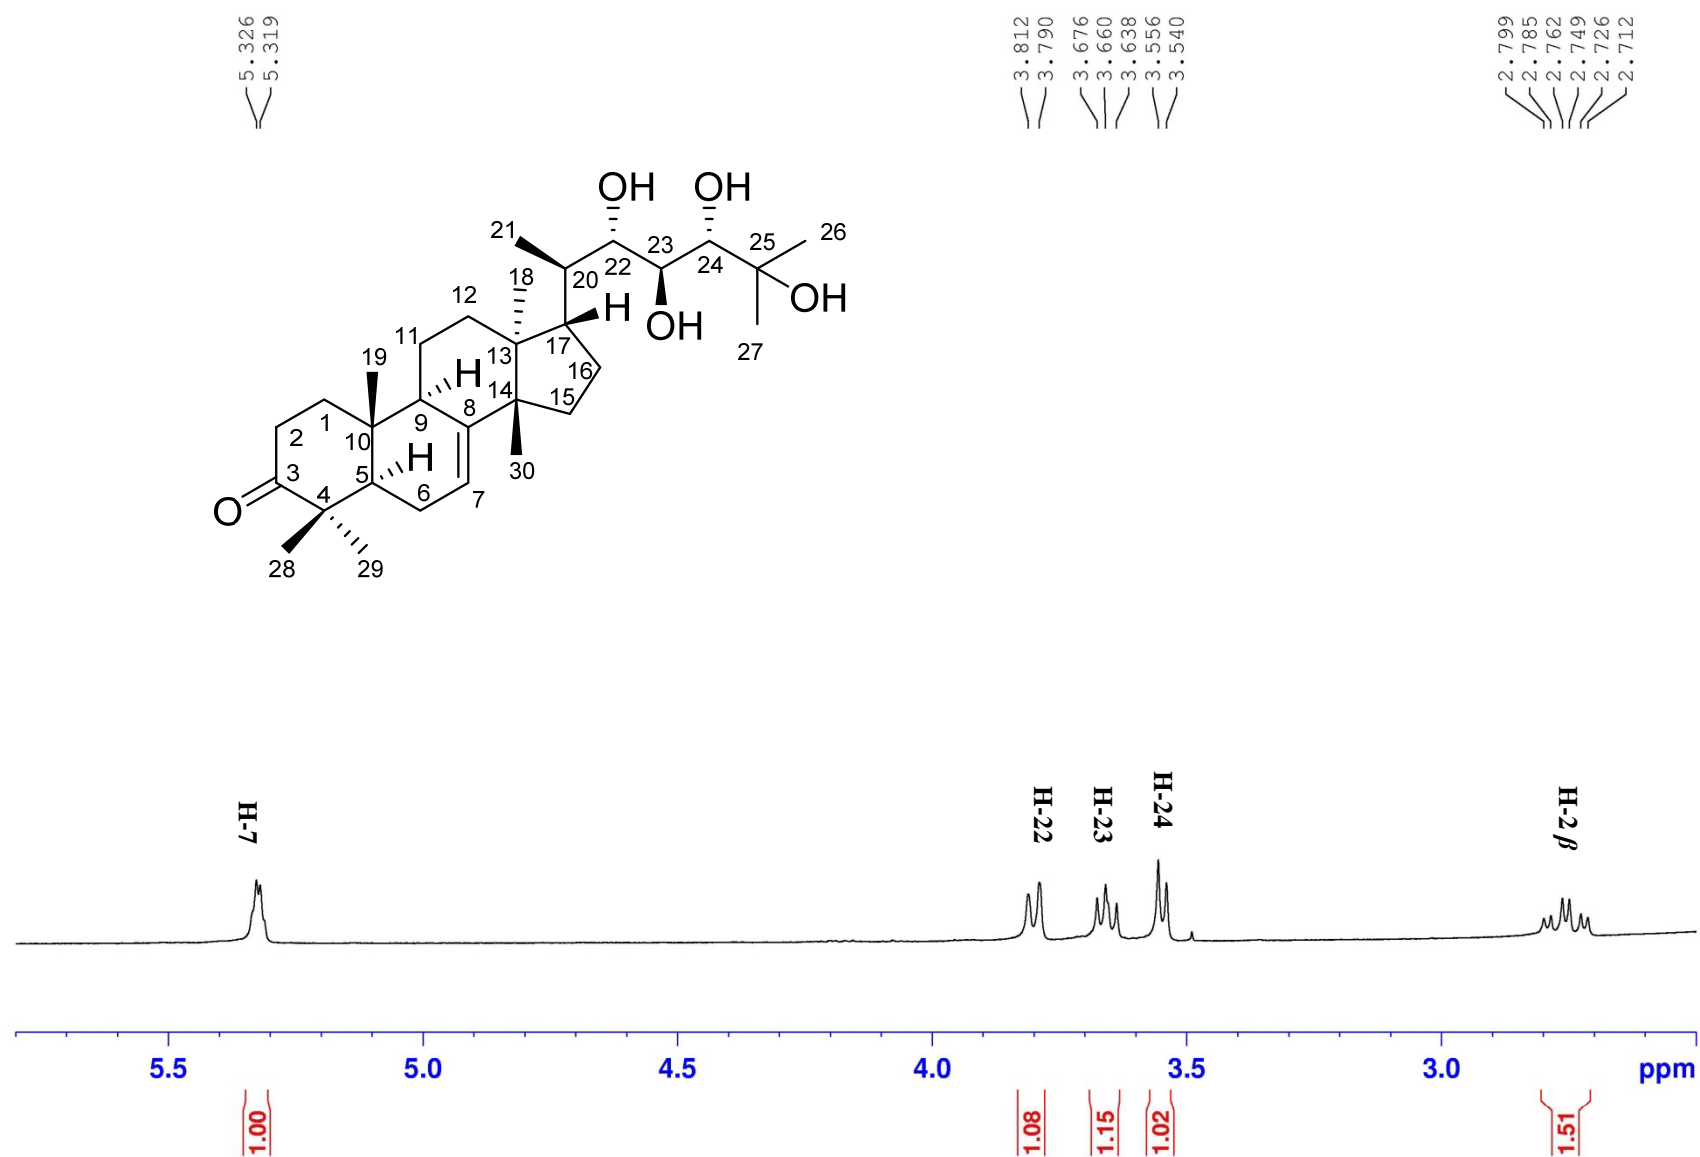

$^1\text{H}$  NMR (400 MHz) spectrum of compound **1** in  $\text{CDCl}_3$

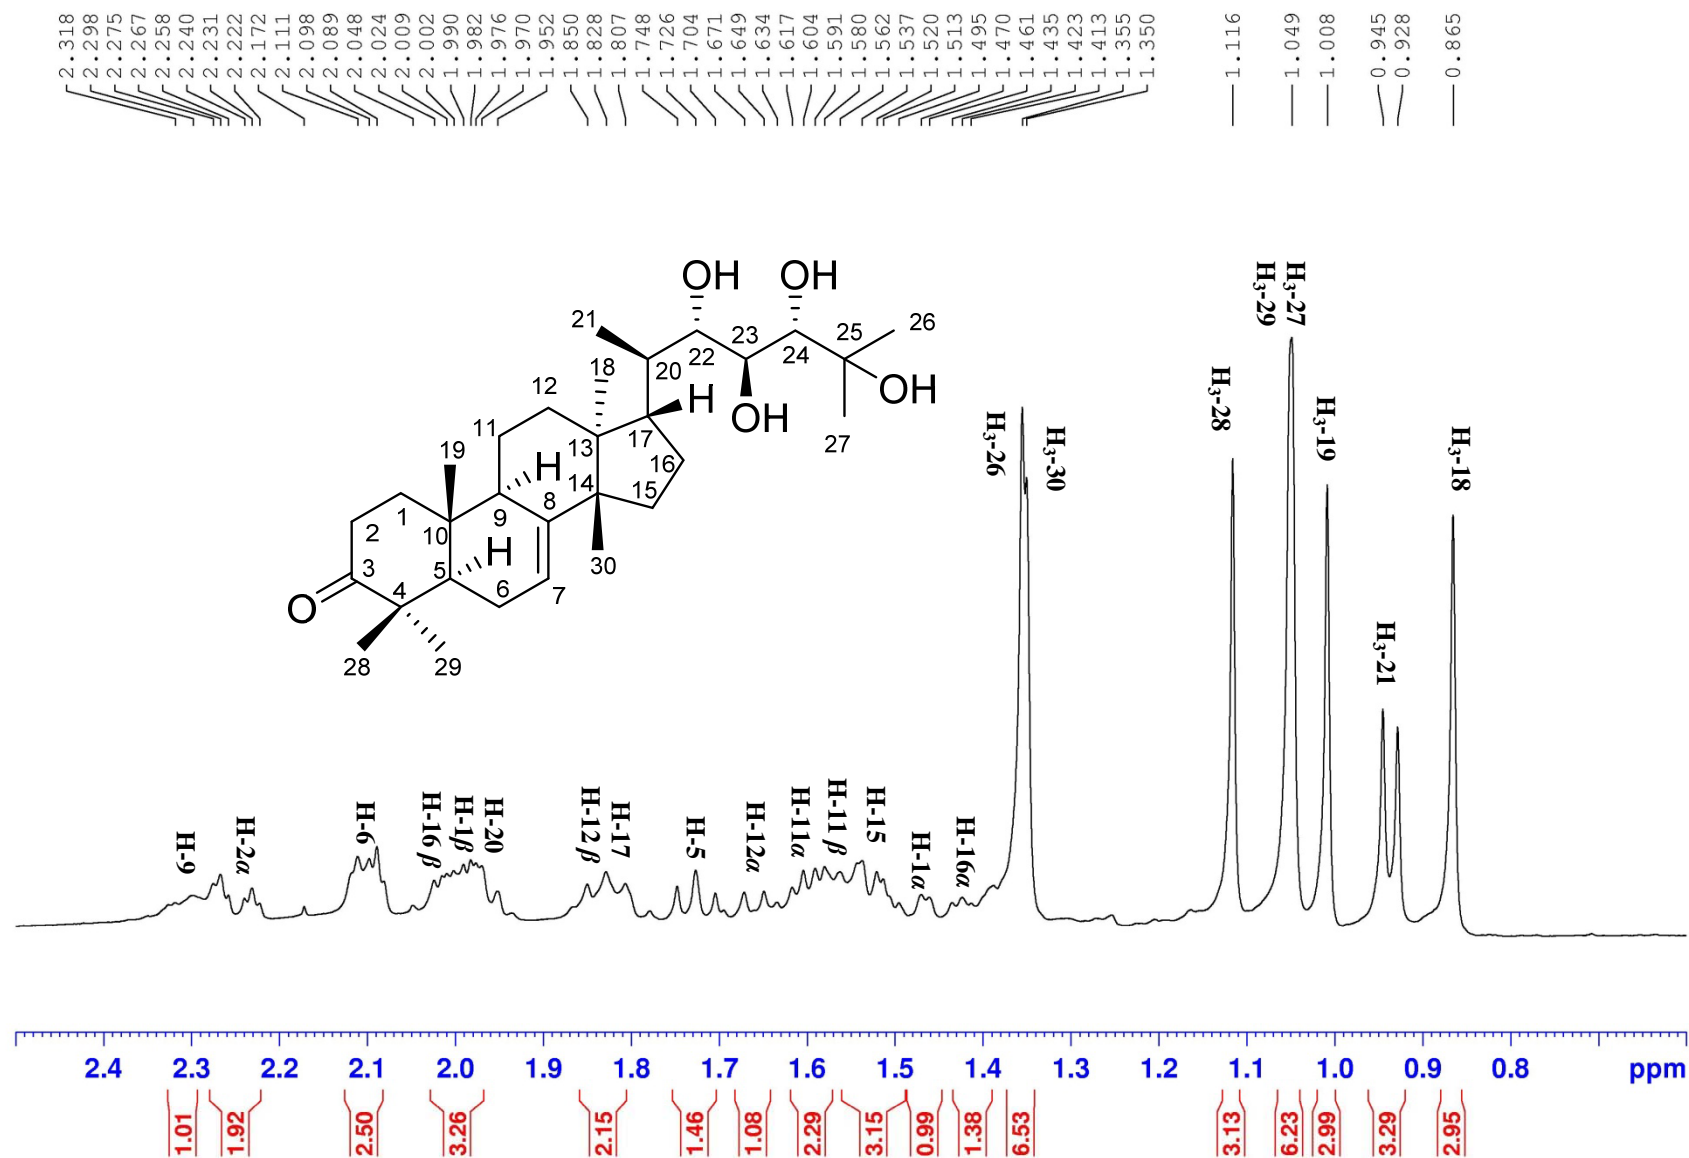



$^{13}\text{C}$  NMR (100 MHz) spectrum of compound **1** in  $\text{CDCl}_3$

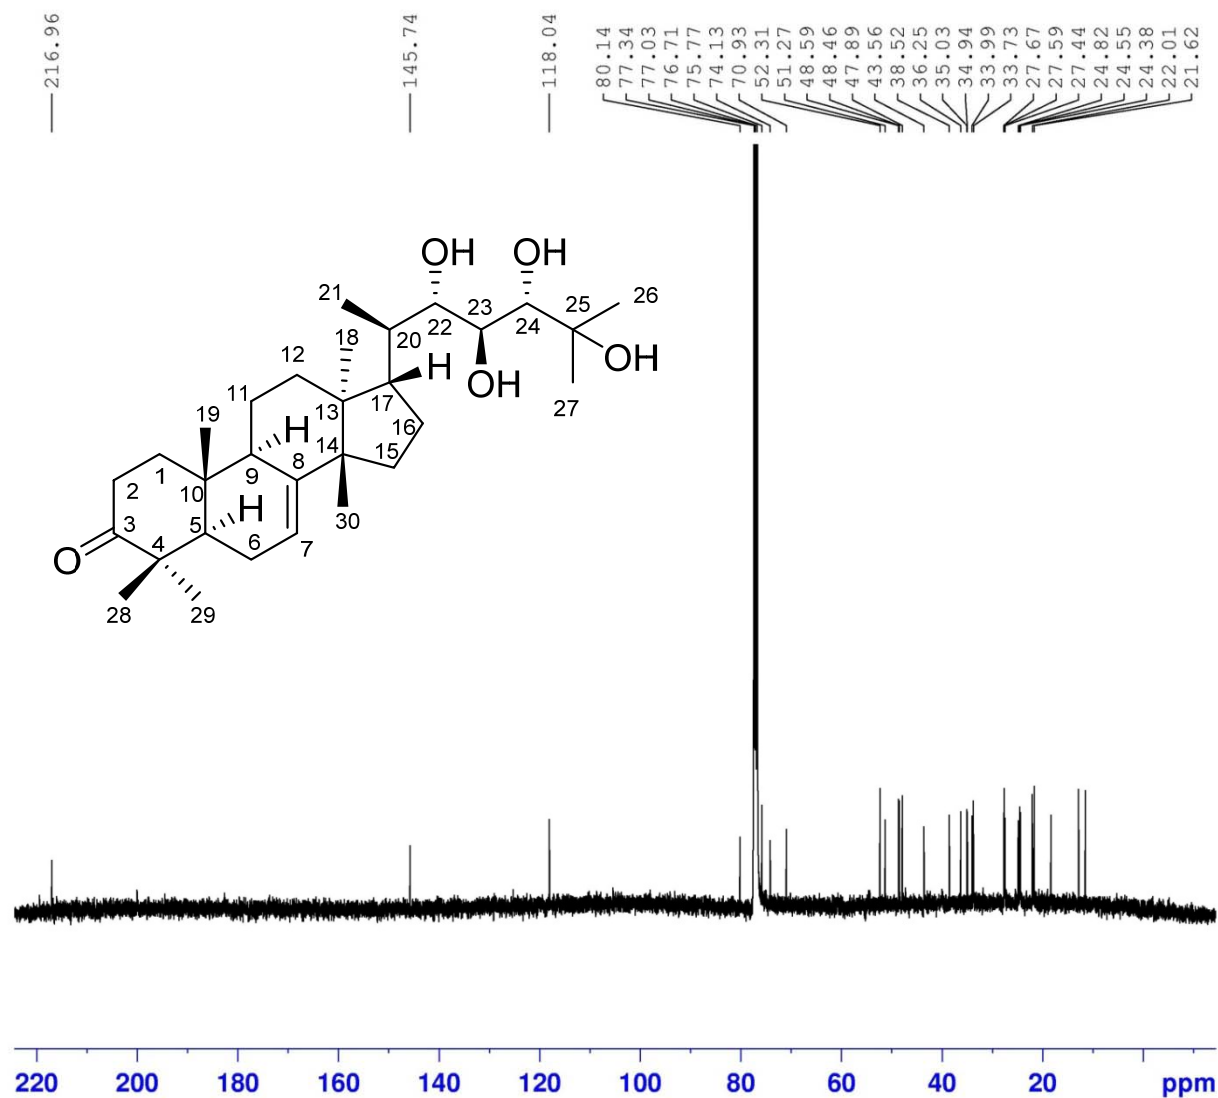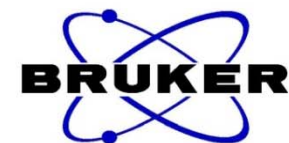

```

NAME           XG-52-3
EXPNO           2
PROCNO          1
Date_           20171226
Time            17.56
INSTRUM         spect
PROBHD          5 mm CPPBBO BB
PULPROG         zgpg30
TD              65536
SOLVENT         CDCl3
NS              1024
DS              4
SWH             24038.461 Hz
FIDRES          0.366798 Hz
AQ              1.3631988 sec
RG              85.34
DW              20.800 usec
DE              18.00 usec
TE              297.0 K
D1              2.00000000 sec
D11             0.03000000 sec
TD0             1
  
```

```

===== CHANNEL f1 =====
SFO1           100.623324 MHz
NUC1            13C
P1              10.00 usec
SI              32768
SF             100.6127685 MHz
WDW             EM
SSB             0
LB              1.00 Hz
GB              0
PC              1.40
  
```

$^{13}\text{C}$  NMR (100 MHz) spectrum of compound **1** in  $\text{CDCl}_3$

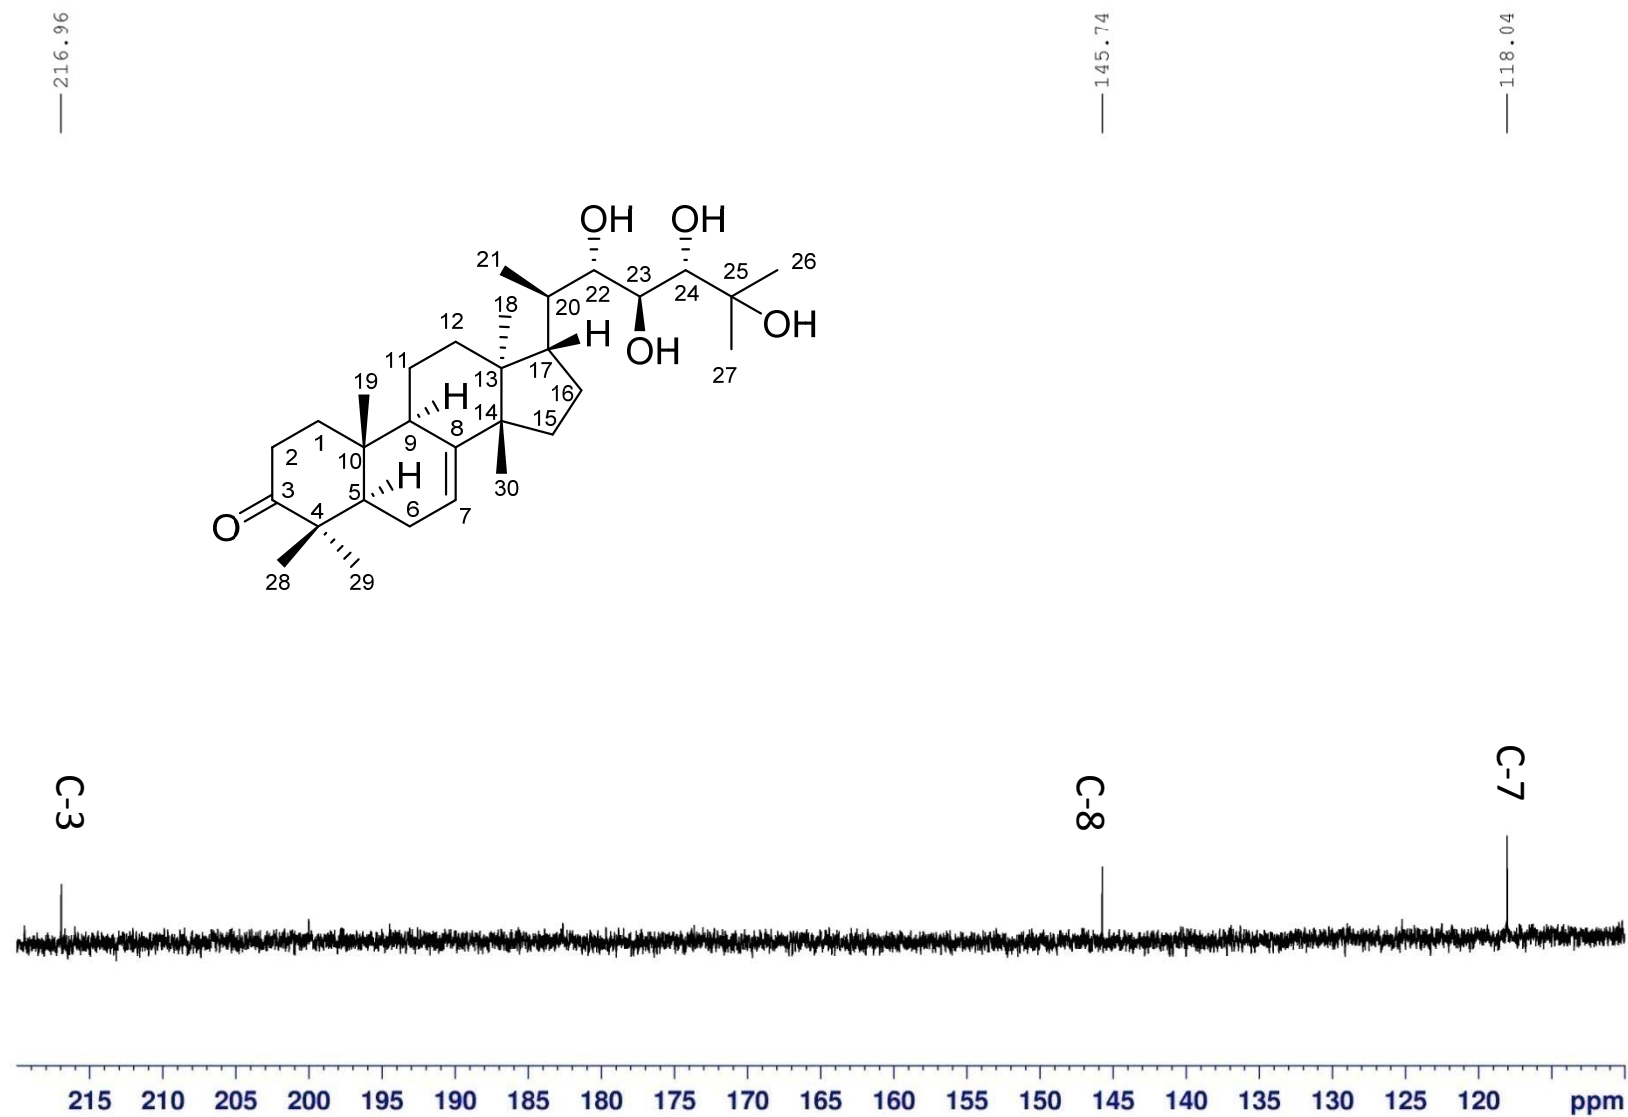

$^{13}\text{C}$  NMR (100 MHz) spectrum of compound **1** in  $\text{CDCl}_3$

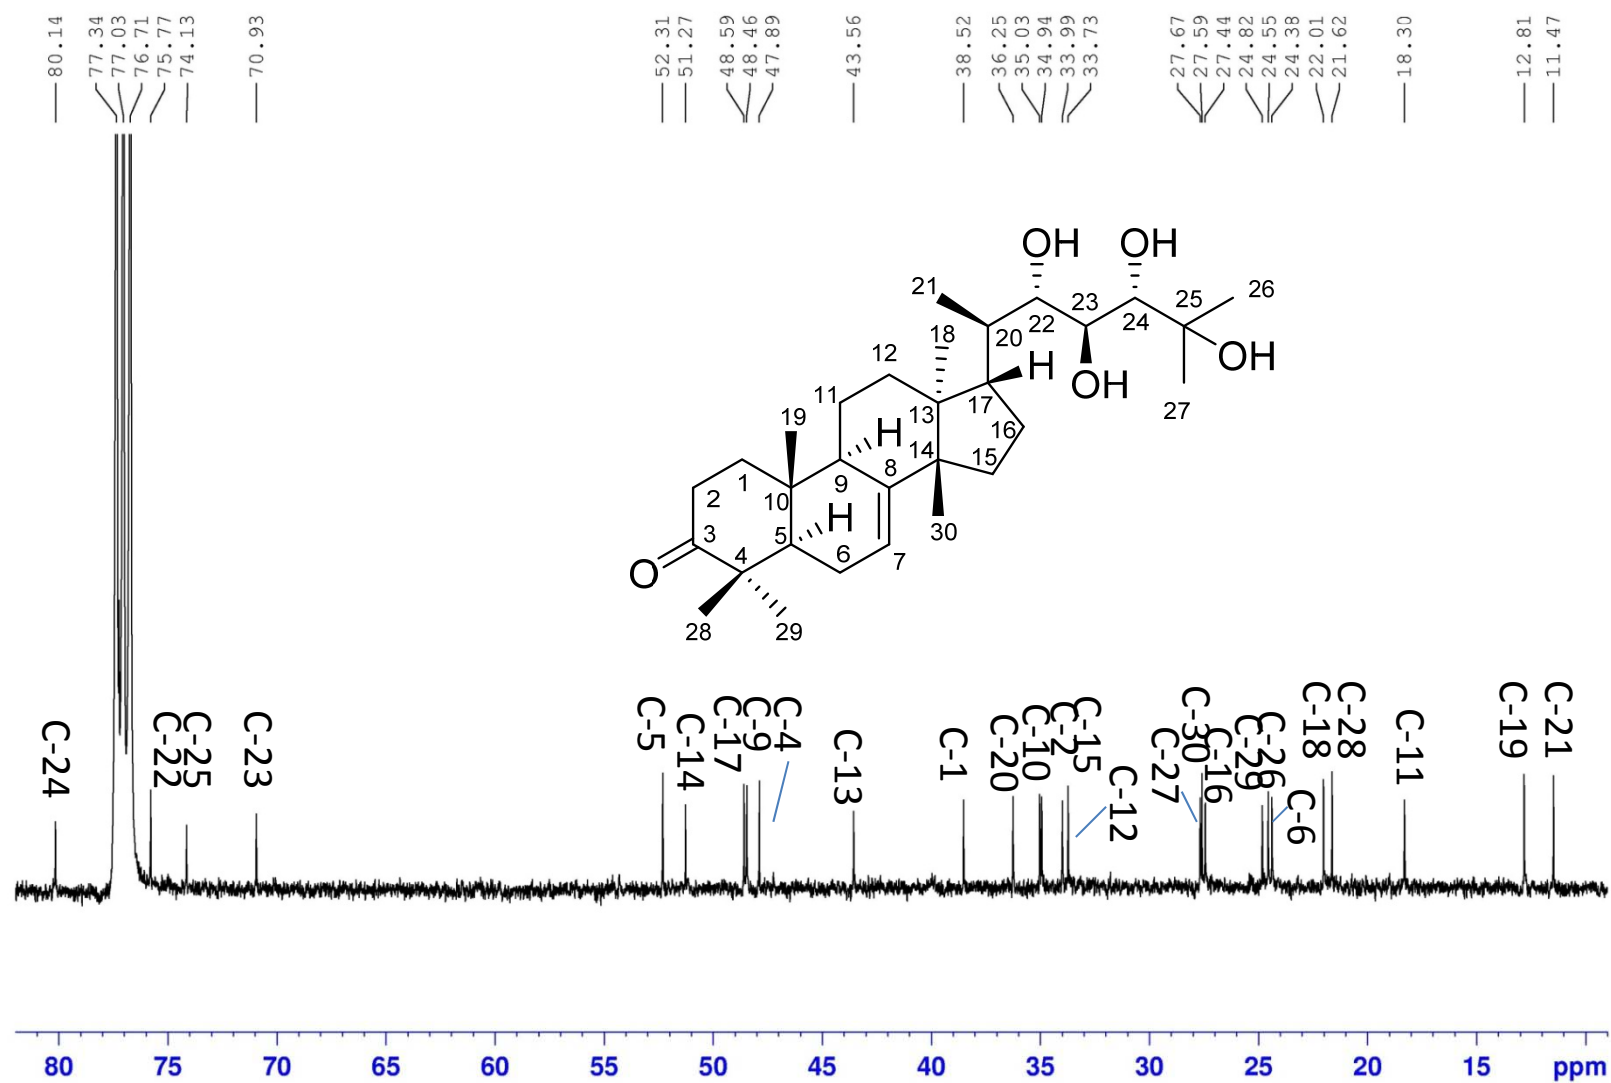

# DEPT135 (100 MHz) spectrum of compound **1** in CDCl<sub>3</sub>

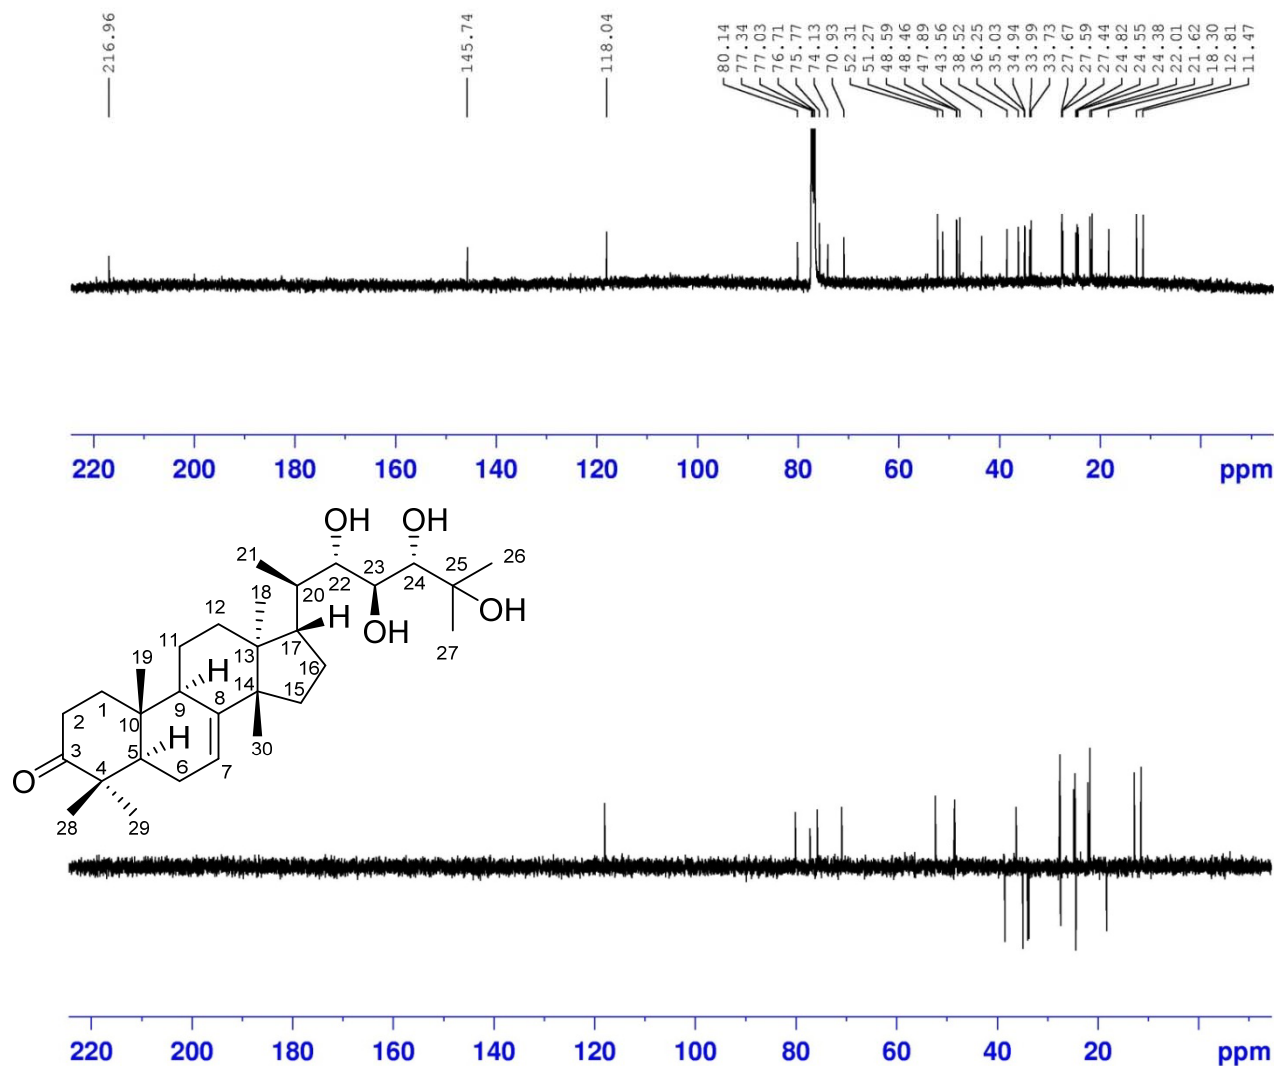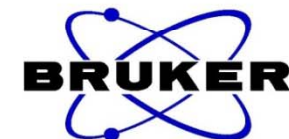

NAME XG-52-3  
 EXPNO 3  
 PROCNO 1  
 Date\_ 20171226  
 Time 18.14  
 INSTRUM spect  
 PROBHD 5 mm CPPBBO BB  
 PULPROG deptspl35  
 TD 65536  
 SOLVENT CDCl3  
 NS 300  
 DS 4  
 SWH 24038.461 Hz  
 FIDRES 0.366798 Hz  
 AQ 1.3631988 sec  
 RG 85.34  
 DW 20.800 usec  
 DE 18.00 usec  
 TE 297.0 K  
 CNST2 145.0000000  
 D1 2.00000000 sec  
 D2 0.00344828 sec  
 D12 0.00002000 sec  
 TD0 1

===== CHANNEL f1 =====  
 SFO1 100.6233324 MHz  
 NUC1 13C  
 P1 10.00 usec  
 P13 2000.00 usec  
 SI 32768  
 SF 100.6127685 MHz  
 WDW EM  
 SSB 0  
 LB 1.00 Hz  
 GB 0  
 PC 1.40

# DEPT135 (100 MHz) spectrum of compound **1** in CDCl<sub>3</sub>

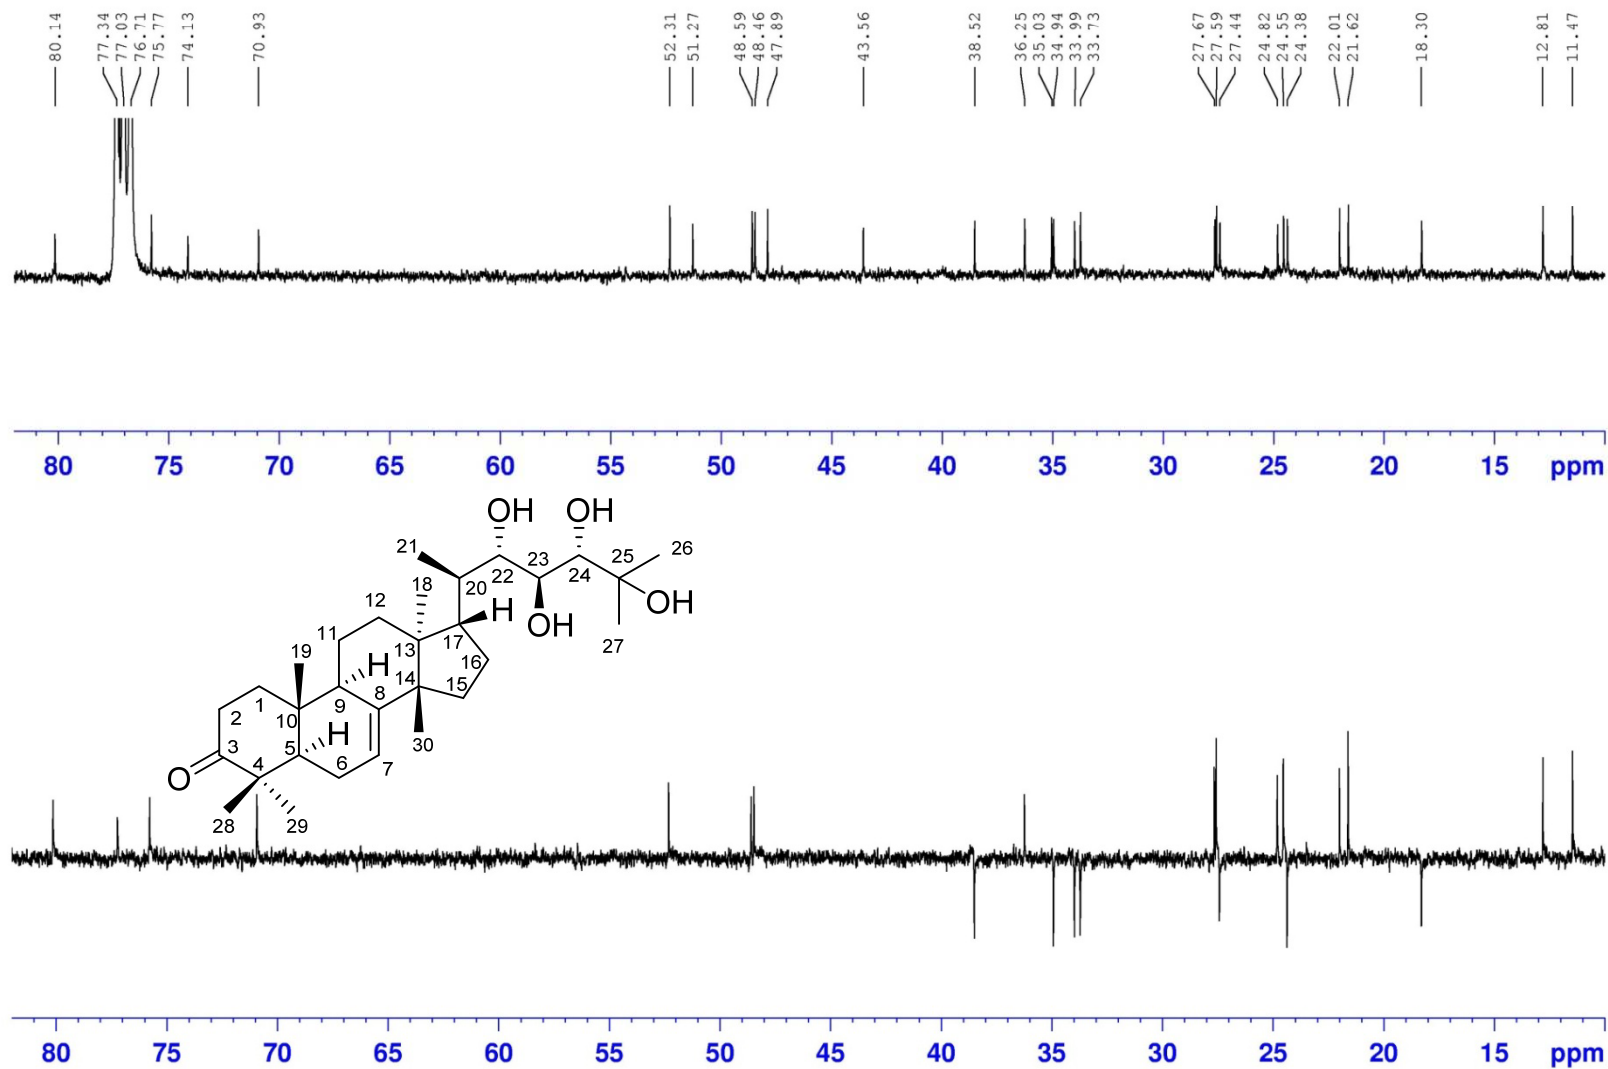

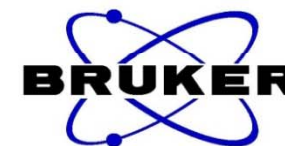

|         |                |
|---------|----------------|
| NAME    | XG-52-3        |
| EXPNO   | 4              |
| PROCNO  | 1              |
| Date_   | 20180205       |
| Time    | 21.34          |
| INSTRUM | spect          |
| PROBHD  | 5 mm CPPBBO BB |
| PULPROG | cosygpppff     |
| TD      | 2048           |
| SOLVENT | CDC13          |
| NS      | 8              |
| DS      | 8              |
| SWH     | 3906.250 Hz    |
| FIDRES  | 1.907349 Hz    |
| AQ      | 0.2621940 sec  |
| RG      | 208.5          |
| DW      | 128.000 usec   |
| DE      | 10.00 usec     |
| TE      | 297.0 K        |
| D0      | 0.00000300 sec |
| D1      | 1.89678097 sec |
| D11     | 0.03000000 sec |
| D12     | 0.00002000 sec |
| D13     | 0.00000400 sec |
| D16     | 0.00020000 sec |
| INO     | 0.00025600 sec |

```

===== CHANNEL f1 =====
SFO1      400.1318006 MHz
NUC1              1H
P0              11.50 usec
P1              11.50 usec
P17         2500.00 usec
ND0              1
TD              128
SFO1      400.1318 MHz
FIDRES     30.517578 Hz
SW          9.762 ppm
FnMODE      QF
SI              1024
SF          400.1300069 MHz
WDW          QSINE
SSB          0
LB          0.00 Hz
GB          0
PC          1.40
SI          1024
MC2         QF
SF          400.1300051 MHz
WDW          QSINE
SSB          0
LB          0.00 Hz

```

$^1\text{H}$ - $^1\text{H}$  COSY (400 MHz) spectrum of compound **1** in  $\text{CDCl}_3$

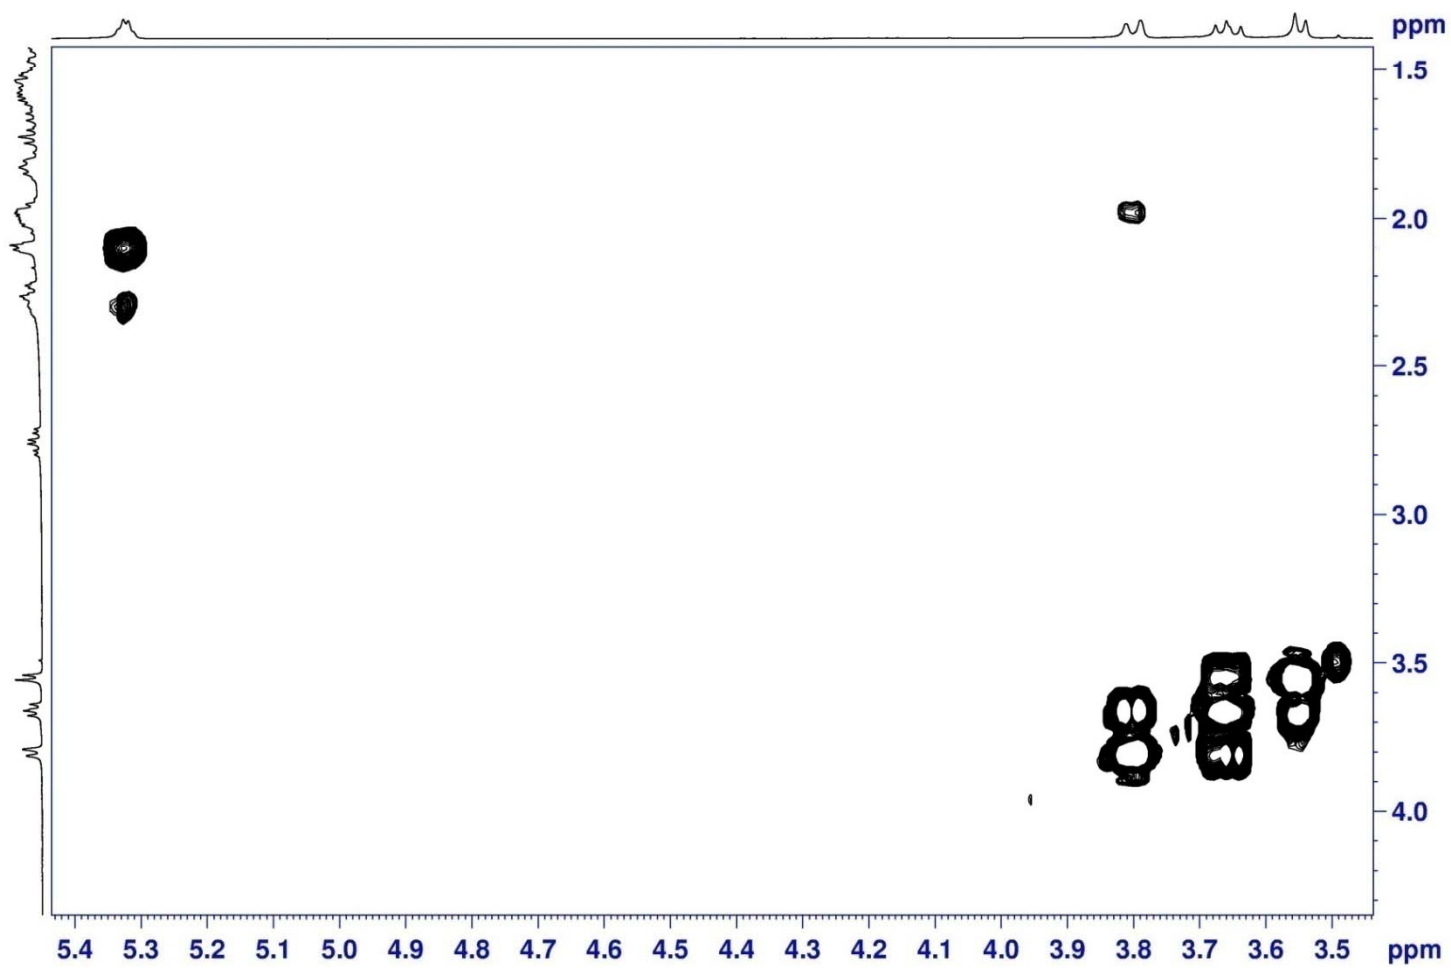

$^1\text{H}$ - $^1\text{H}$  COSY (400 MHz) spectrum of compound **1** in  $\text{CDCl}_3$

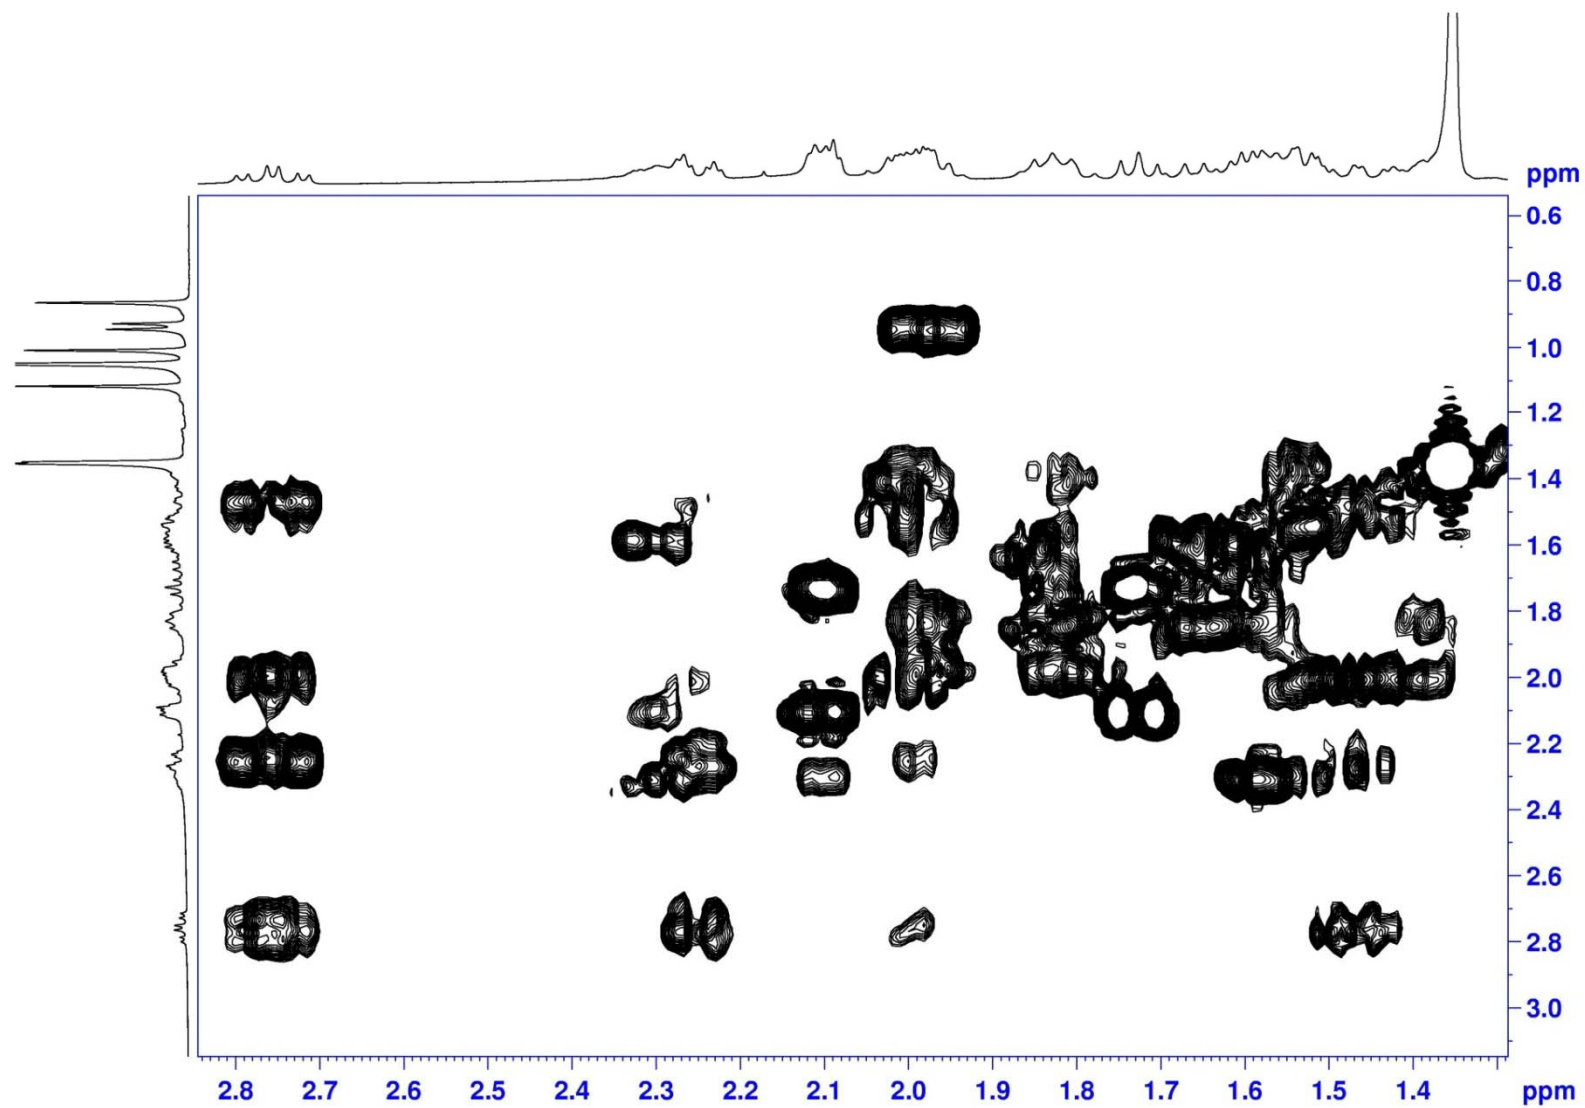



# HSQC (400 MHz) spectrum of compound **1** in CDCl<sub>3</sub>

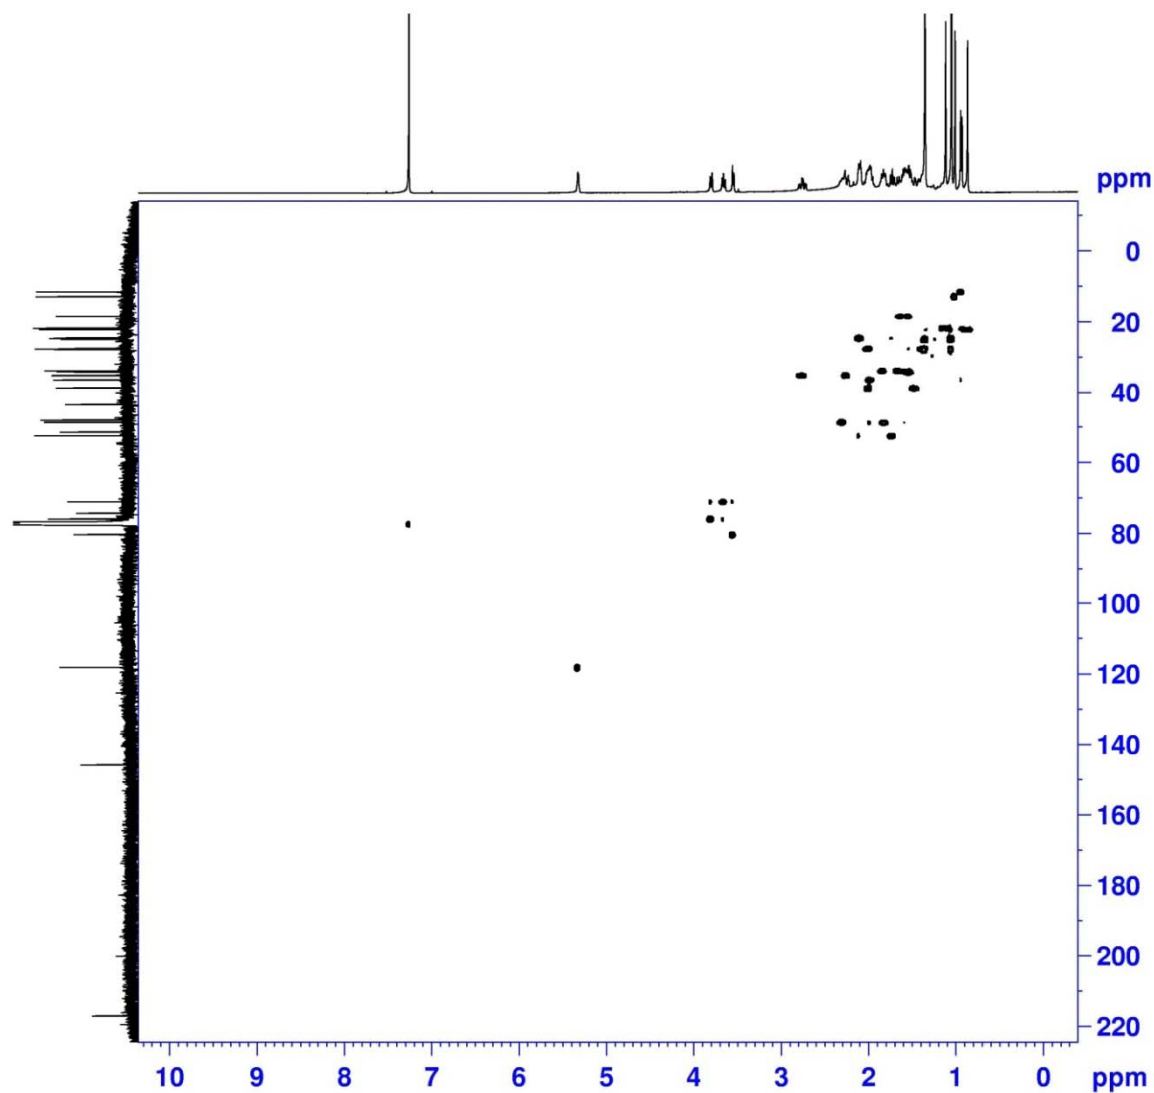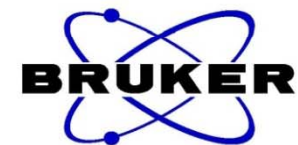

```

NAME                XG-52-3
EXPNO                5
PROCNO              1
Date_               20180205
Time                22.14
INSTRUM             spect
PROBHD              5 mm CPBBO BB
PULPROG             hsqcetgpsi2
TD                 1024
SOLVENT             CDCl3
NS                  16
DS                  16
SWH                 4302.926 Hz
FIDRES              4.202076 Hz
AQ                  0.1190388 sec
RG                  208.5
DW                  116.200 usec
DE                  10.00 usec
TE                  297.0 K
CNST2               145.0000000
D0                  0.00000300 sec
D1                  1.46497905 sec
D4                  0.00172414 sec
D11                 0.03000000 sec
D16                 0.00020000 sec
D24                 0.00086207 sec
INO                 0.00002080 sec
ZGPTNS

===== CHANNEL f1 =====
SFO1                400.1320007 MHz
NUC1                 1H
P1                   11.50 usec
P2                   23.00 usec
P28                  0.00 usec
ND0                  2
TD                   256
SFO1                100.6233 MHz
FIDRES              93.900238 Hz
SW                   238.896 ppm
FnMODE              Echo-Antiecho
SI                  1024
SF                  400.1300070 MHz
WDW                 QSINE
SSB                  2
LB                   0.00 Hz
GB                   0
PC                   1.40
SI                  1024
MC2                 echo-antiecho
SF                  100.6127585 MHz
WDW                 QSINE
SSB                  2
LB                   0.00 Hz
    
```

HSQC (400 MHz) spectrum of compound **1** in CDCl<sub>3</sub>

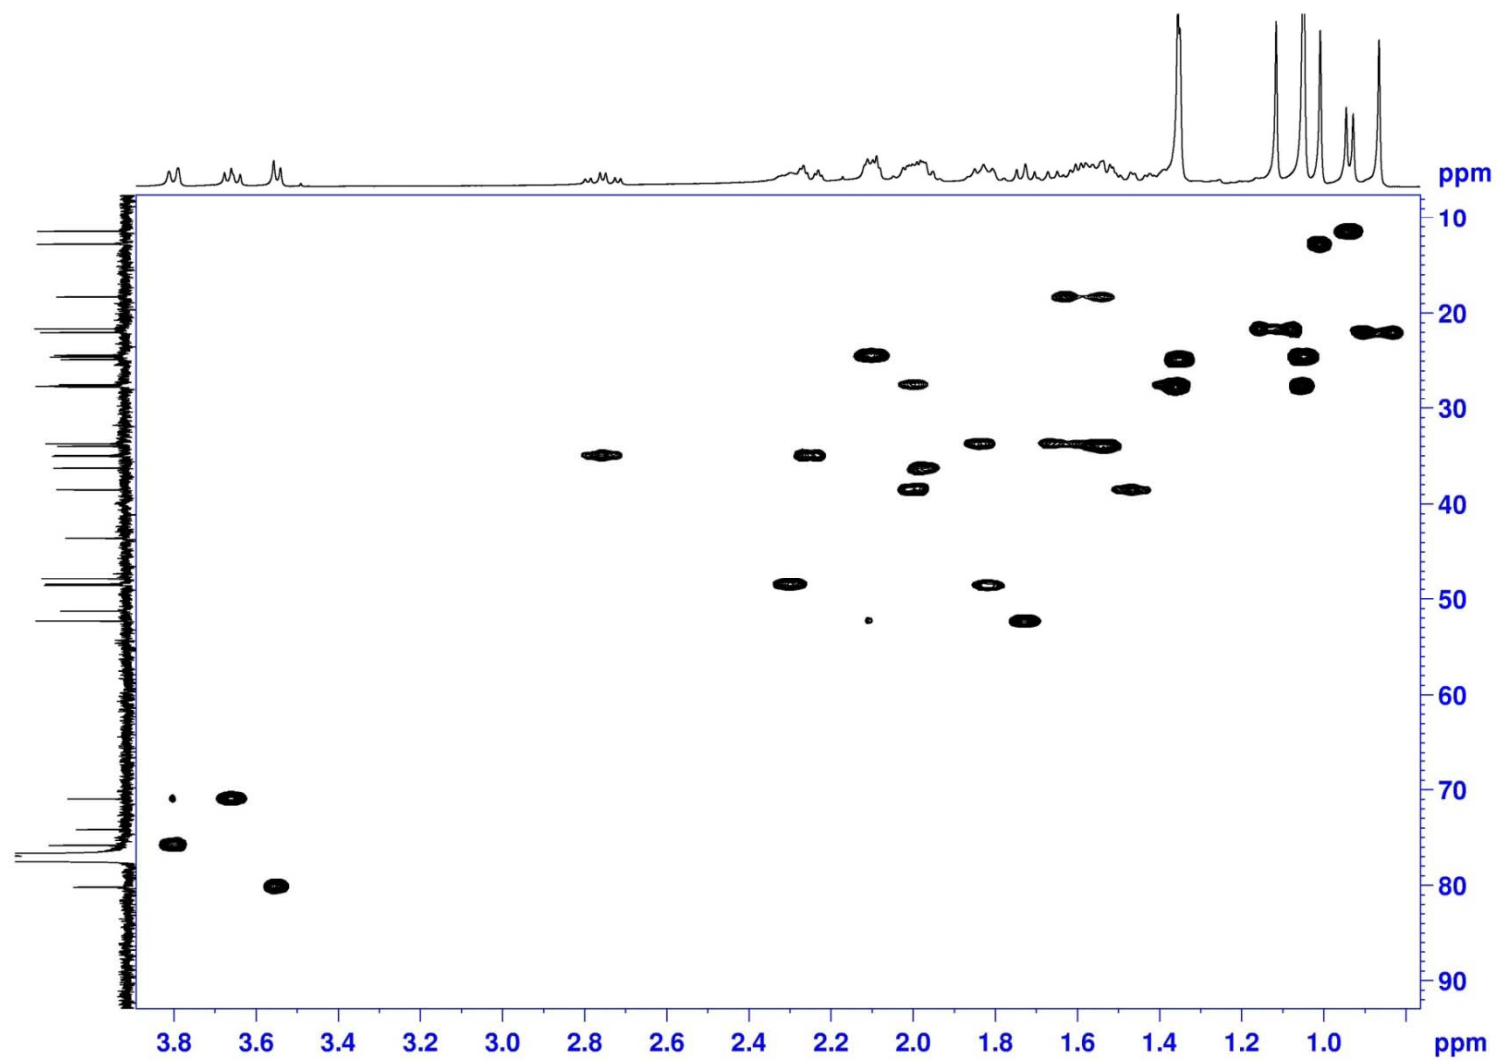

HSQC (400 MHz) spectrum of compound **1** in CDCl<sub>3</sub>

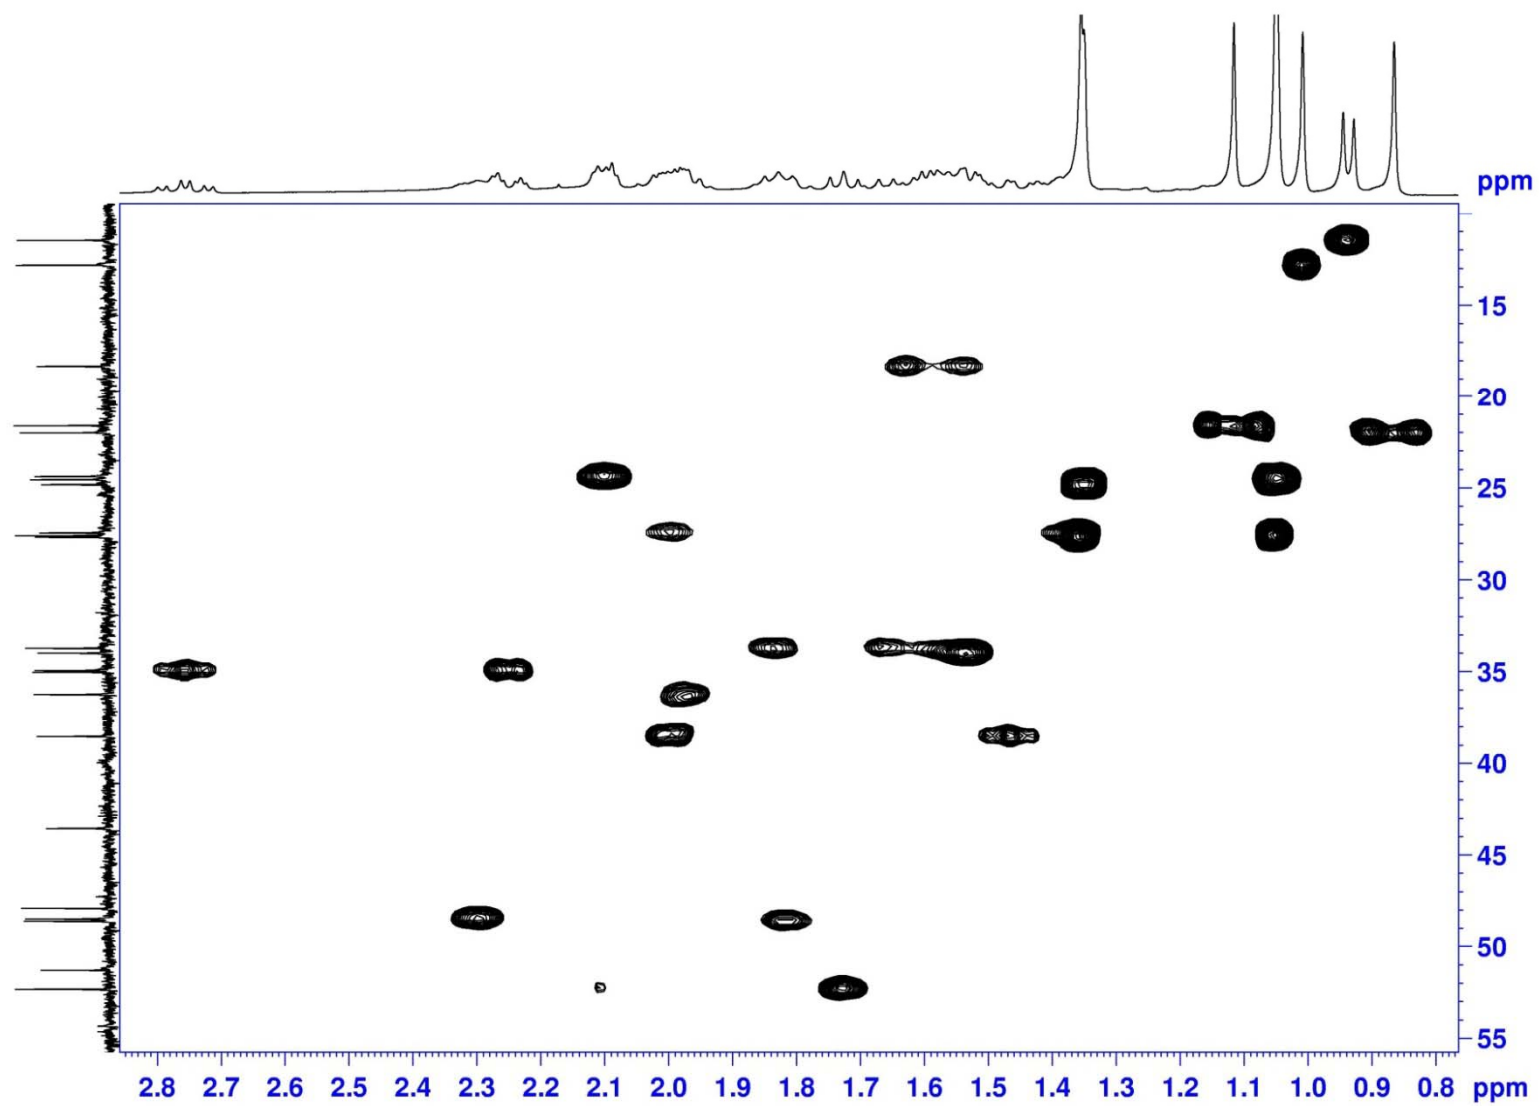

# HMBC (400 MHz) spectrum of compound **1** in CDCl<sub>3</sub>

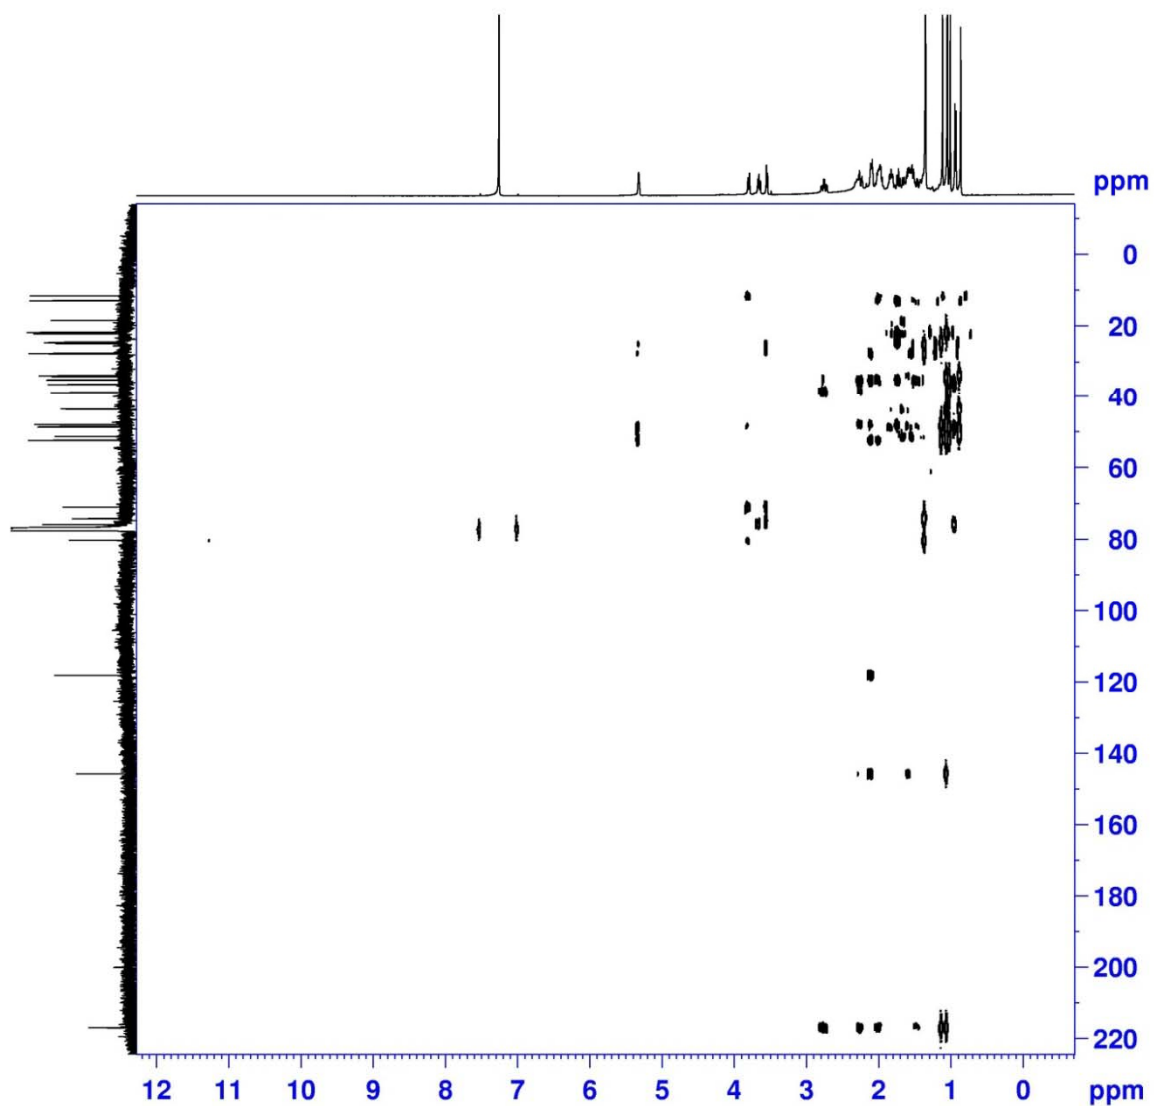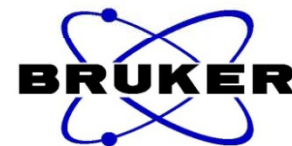

```

NAME           XG-52-3
EXPNO           6
PROCNO          1
Date_           20180206
Time            0.05
INSTRUM         spect
PROBHD          5 mm CPPBBO BB
PULPROG         hmbcggplpndqf
TD              4096
SOLVENT         CDCl3
NS              32
DS              16
SWH             5197.505 Hz
FIDRES          1.268922 Hz
AQ              0.3940852 sec
RG              208.5
DW              96.200 usec
DE              10.00 usec
TE              297.0 K
CNST2           145.0000000
CNST13          10.0000000
D0              0.00000300 sec
D1              1.50000000 sec
D2              0.00344828 sec
D6              0.05000000 sec
D16             0.00020000 sec
IN0             0.00002080 sec
  
```

```

===== CHANNEL f1 =====
SFO1           400.1323208 MHz
NUC1            1H
P1              11.50 usec
P2              23.00 usec
ND0             2
TD              128
SFO1           100.6233 MHz
FIDRES          187.800476 Hz
SW              238.896 ppm
FnMODE          QF
SI              2048
SF              400.1300070 MHz
WDW             SINE
SSB             0
LB              0.00 Hz
GB              0
PC              1.40
SI              1024
MC2             QF
SF              100.6127630 MHz
WDW             SINE
SSB             0
  
```

HMBC (400 MHz) spectrum of compound **1** in CDCl<sub>3</sub>

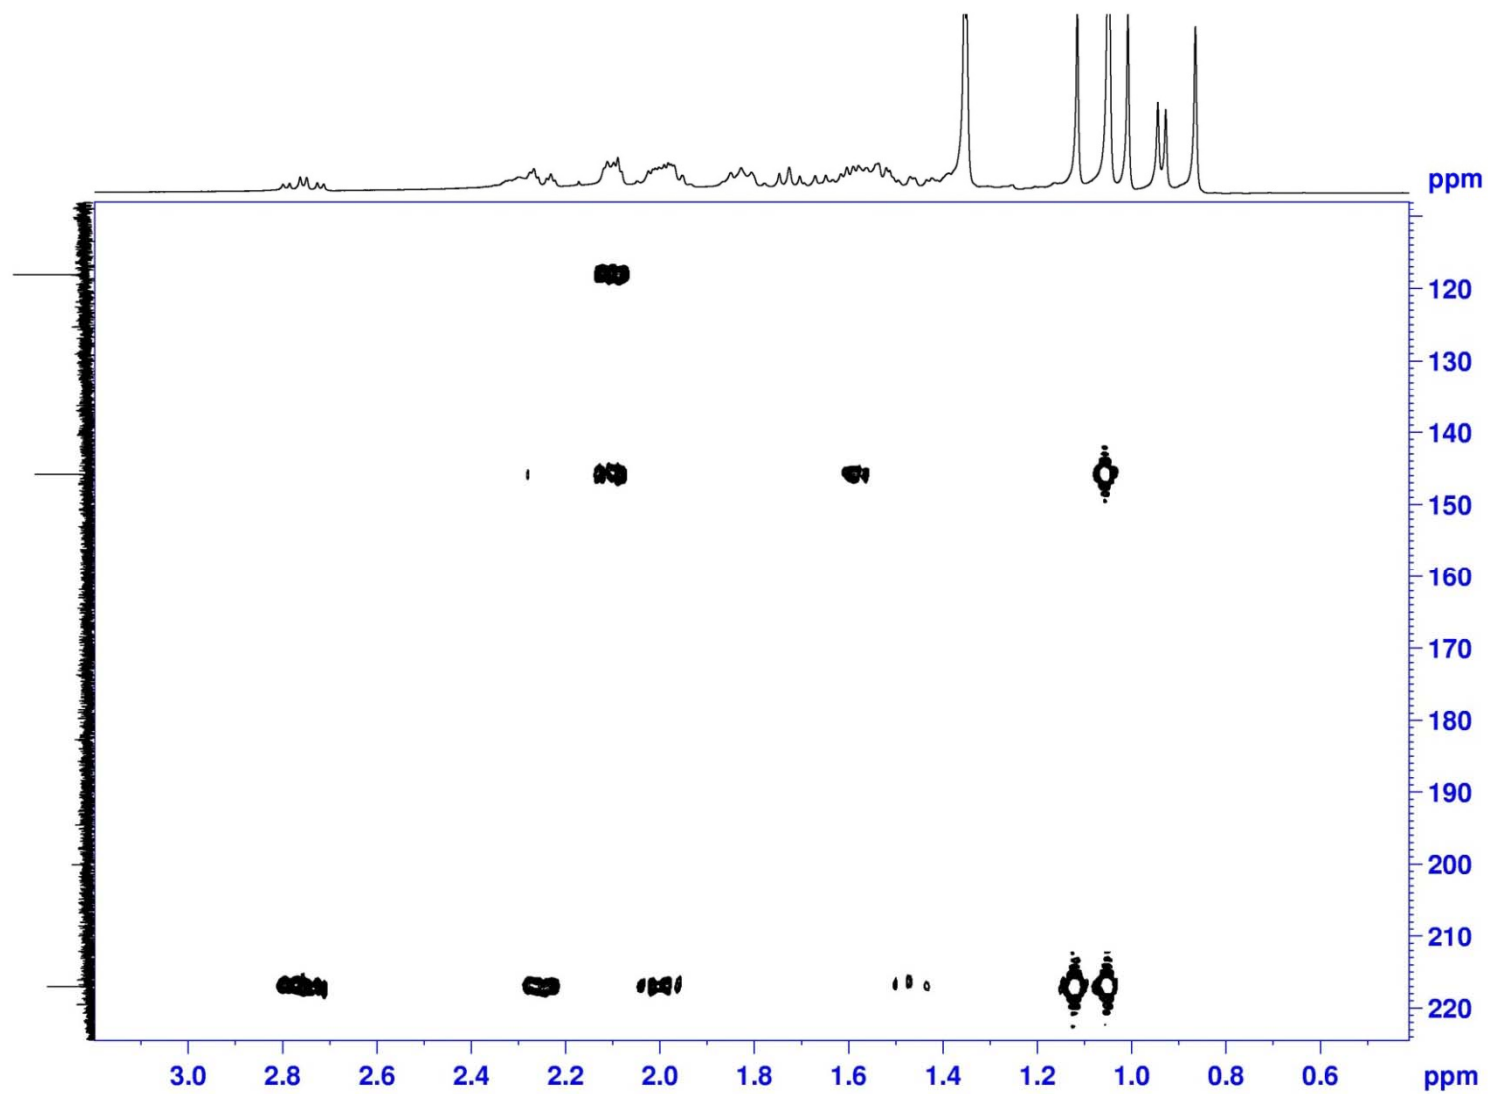

HMBC (400 MHz) spectrum of compound **1** in CDCl<sub>3</sub>

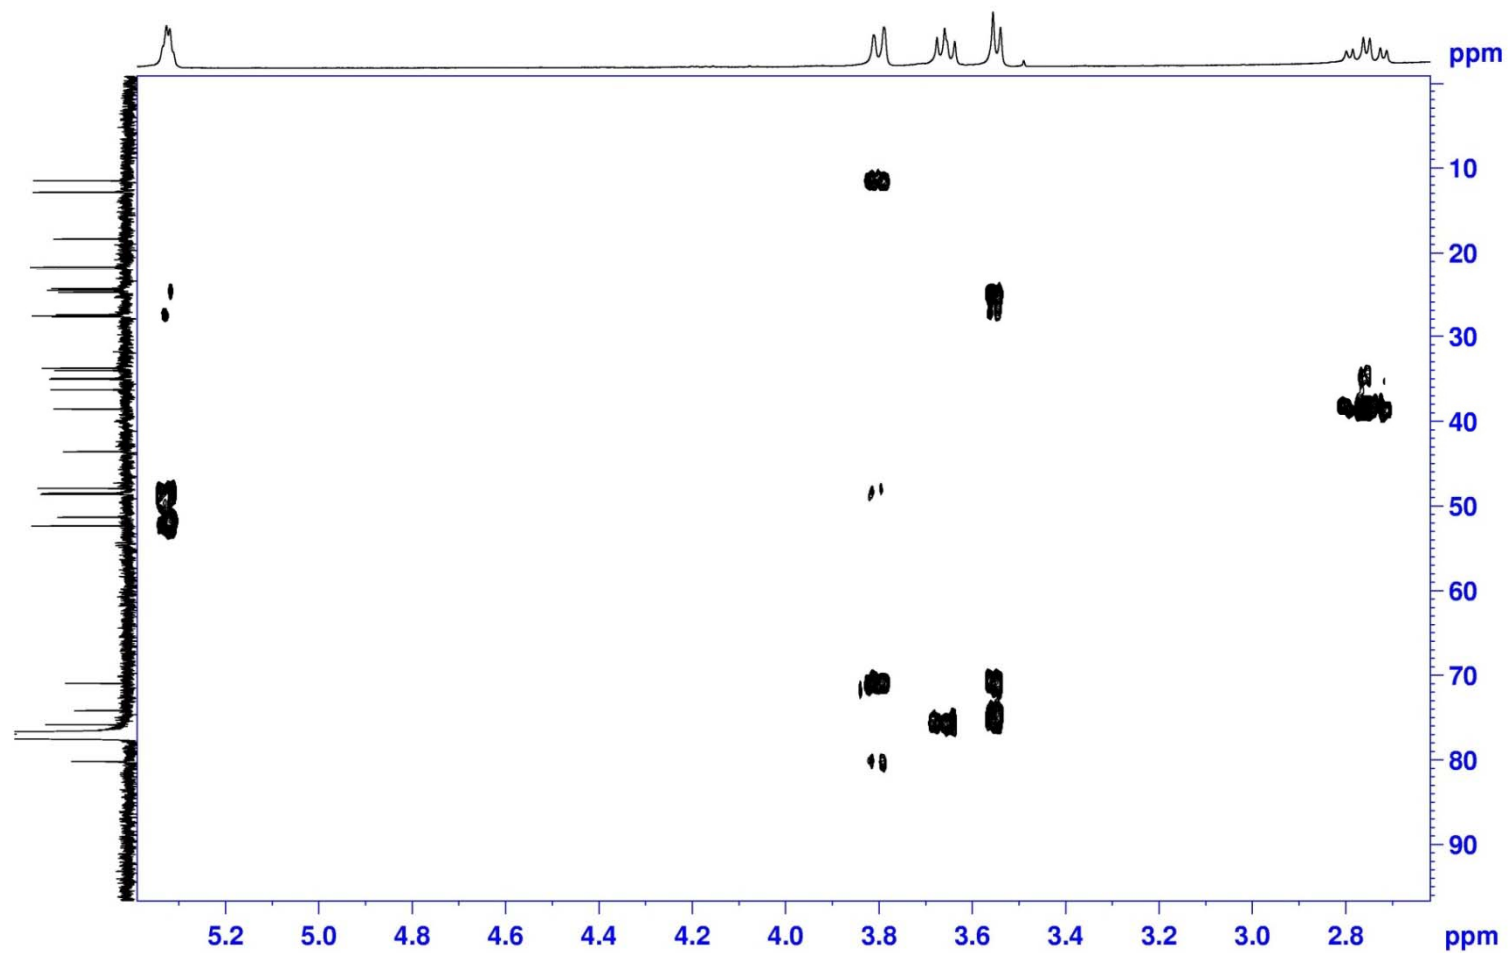

HMBC (400 MHz) spectrum of compound **1** in CDCl<sub>3</sub>

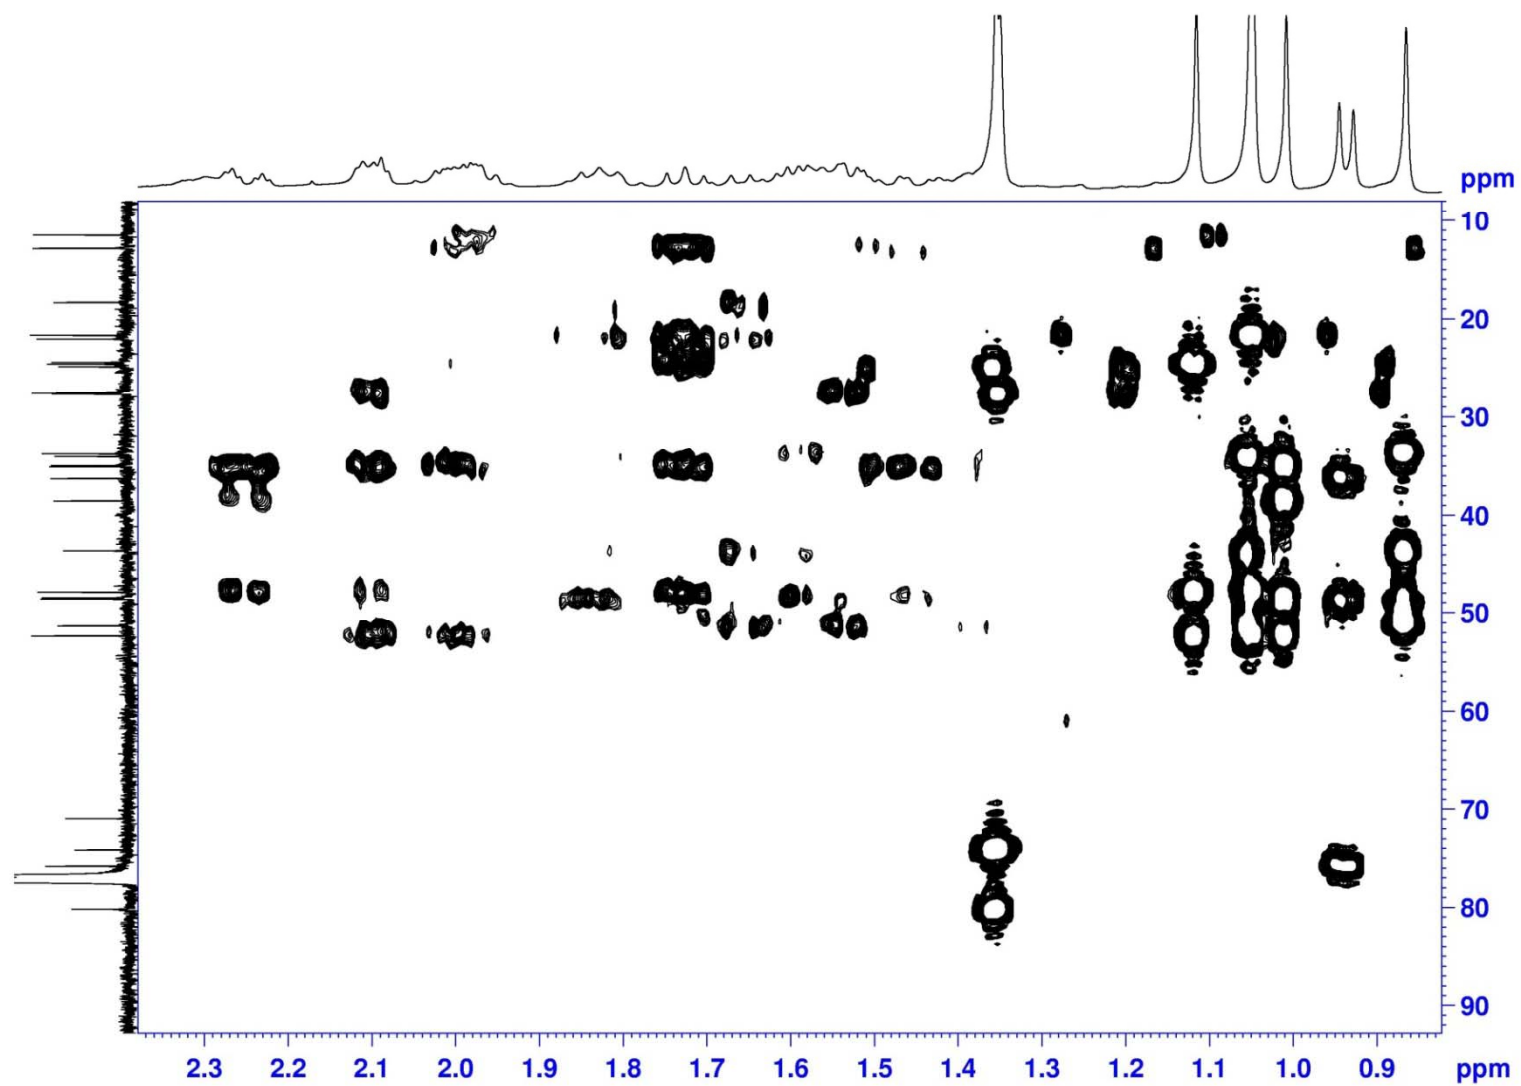

HMBC (400 MHz) spectrum of compound **1** in CDCl<sub>3</sub>

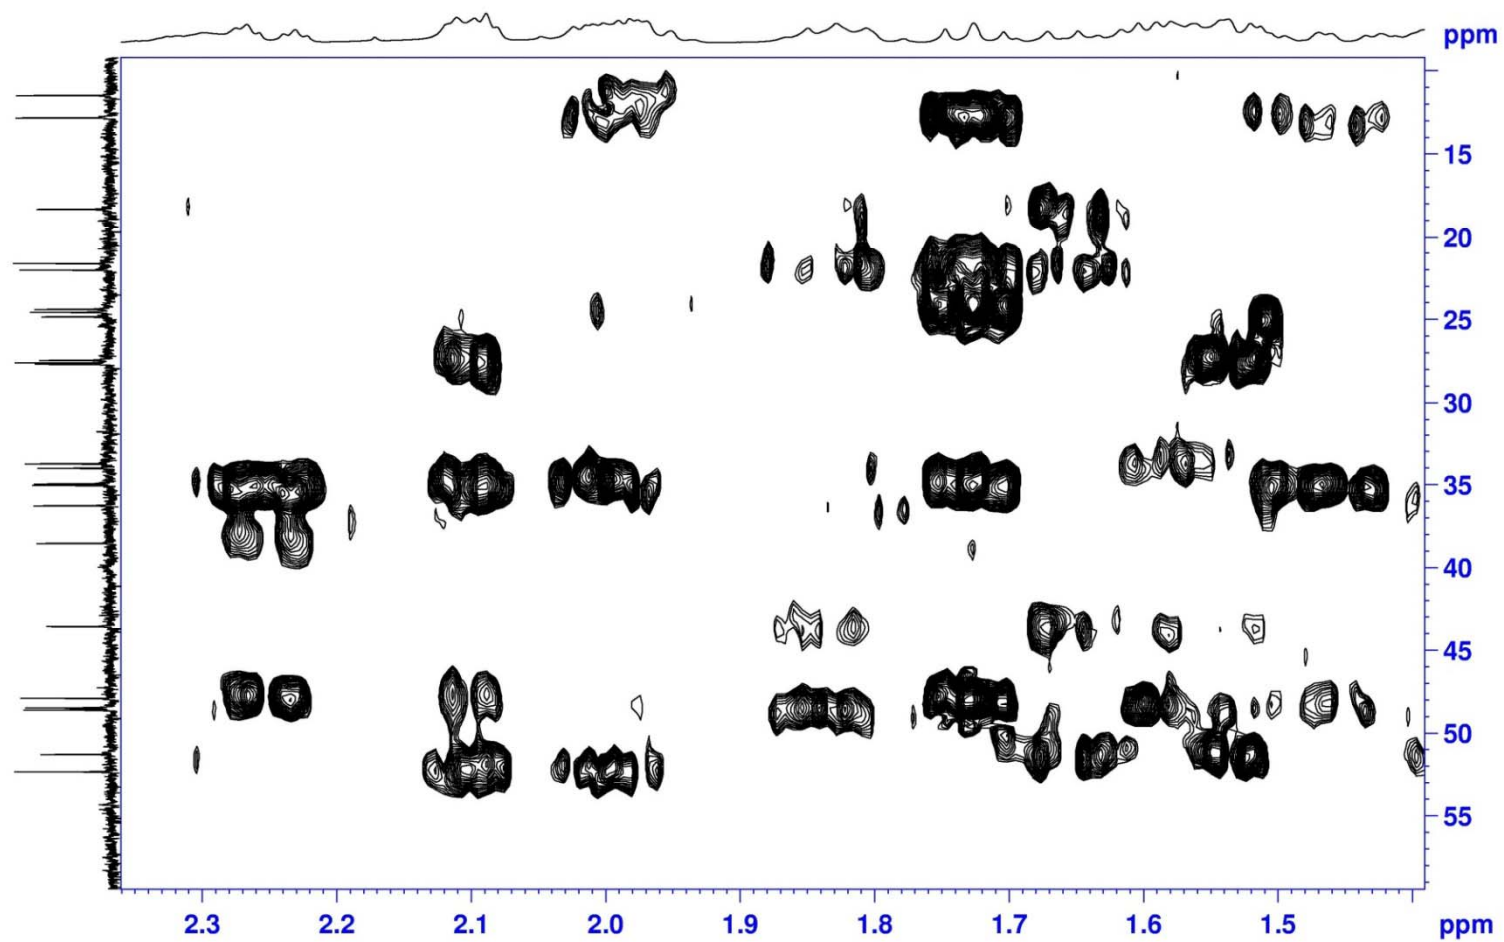



HMBC (400 MHz) spectrum of compound **1** in CDCl<sub>3</sub>

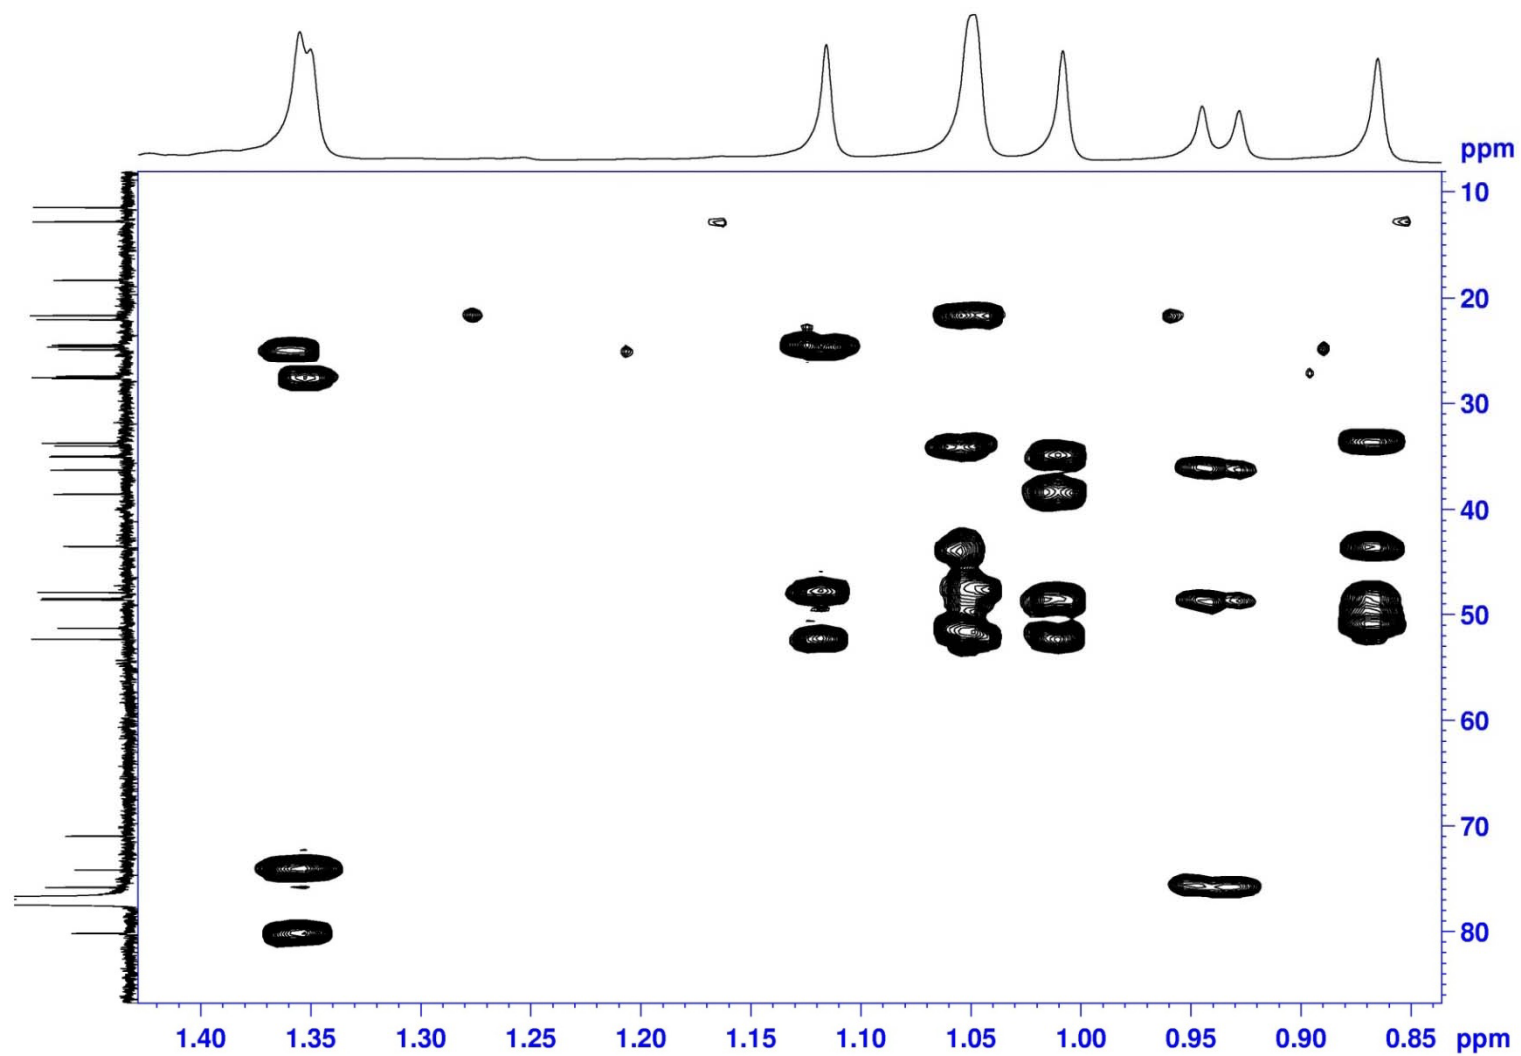

# NOESY (400 MHz) spectrum of compound **1** in CDCl<sub>3</sub>

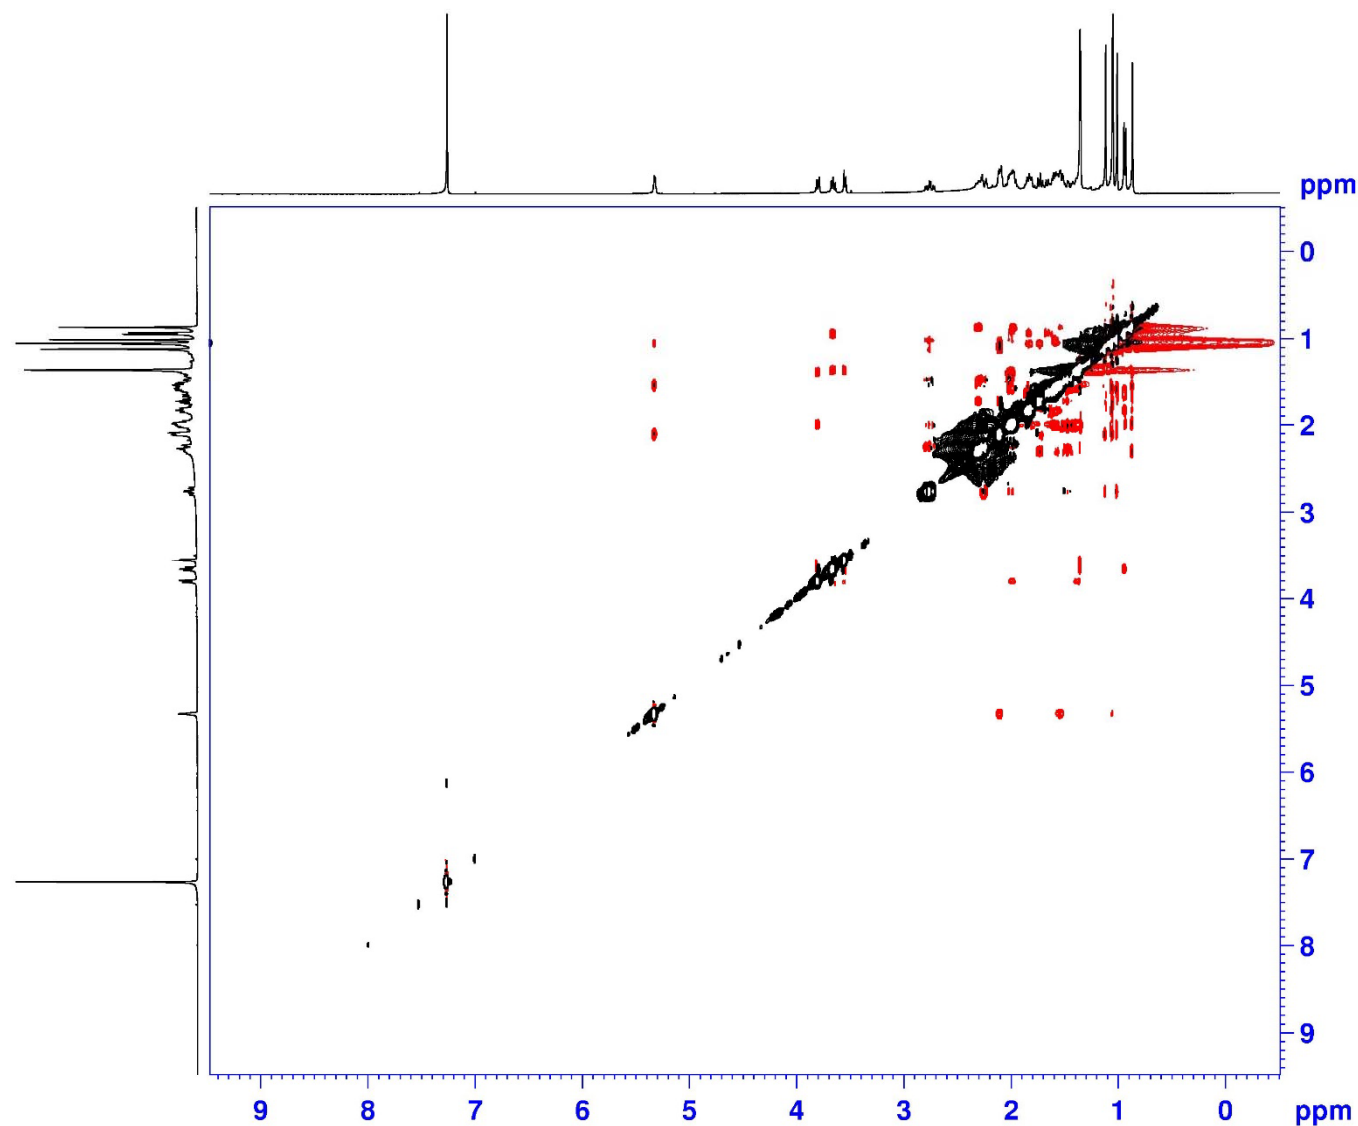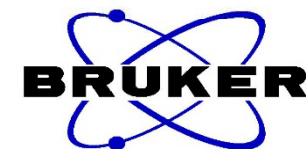

```

NAME          XG-52-3
EXPNO          7
PROCNO         1
Date_         20180206
Time           2.21
INSTRUM        spect
PROBHD         5 mm CPPBBO BB
PULPROG        noesygpphpp
TD             2048
SOLVENT        CDCl3
NS             16
DS             32
SWH            4000.000 H
FIDRES         1.953125 H
AQ             0.2560500 s
RG             208.5
DW             125.000 u
DE             10.00 u
TE             297.0 K
D0             0.00011036 s
D1             1.99385595 s
D8             0.30000001 s
D11            0.03000000 s
D12            0.00002000 s
D16            0.00020000 s
IN0            0.00025000 s
  
```

```

===== CHANNEL f1 =====
SFO1         400.1318006 M
NUC1          1H
P1            11.50 u
P2            23.00 u
P17           2500.00 u
ND0           1
TD            256
SFO1         400.1318 M
FIDRES        15.625000 H
SW            9.997 p
FnMODE        States-TPPI
SI            1024
SF            400.1300072 M
WDW            QSINE
SSB            2
LB            0.00 H
GB            0
PC            1.00
SI            1024
MC2           States-TPPI
SF            400.1300082 M
  
```

NOESY (400 MHz) spectrum of compound **1** in CDCl<sub>3</sub>

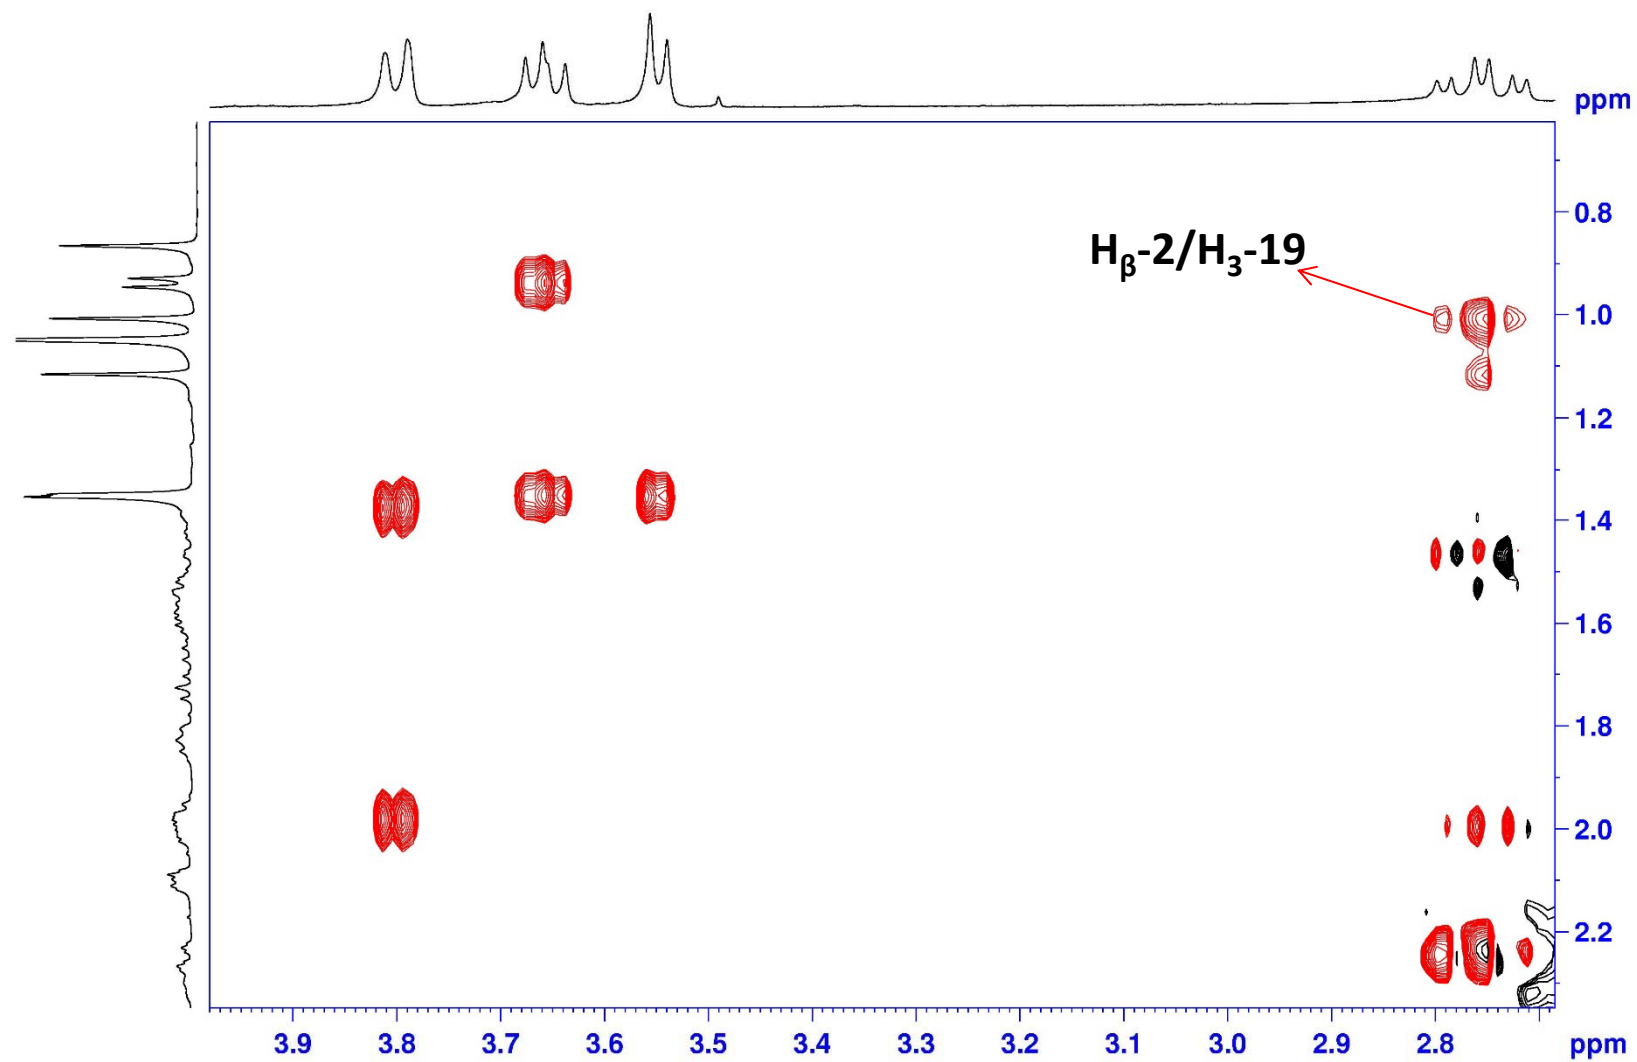

NOESY (400 MHz) spectrum of compound **1** in  $\text{CDCl}_3$

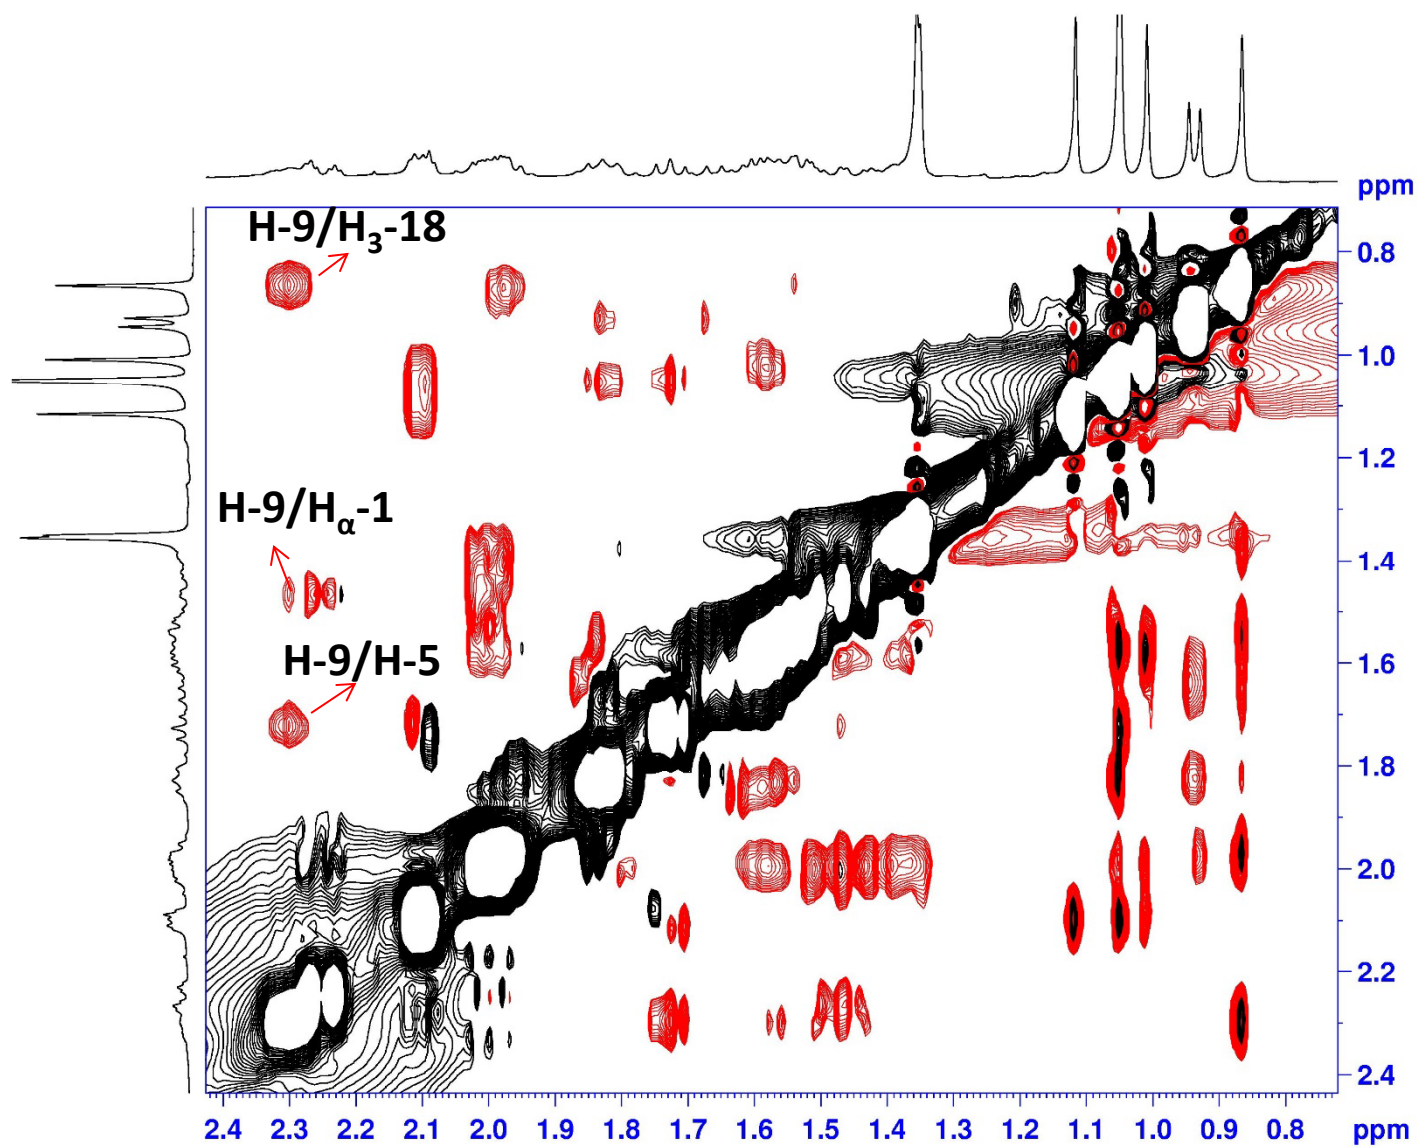

NOESY (400 MHz) spectrum of compound **1** in CDCl<sub>3</sub>

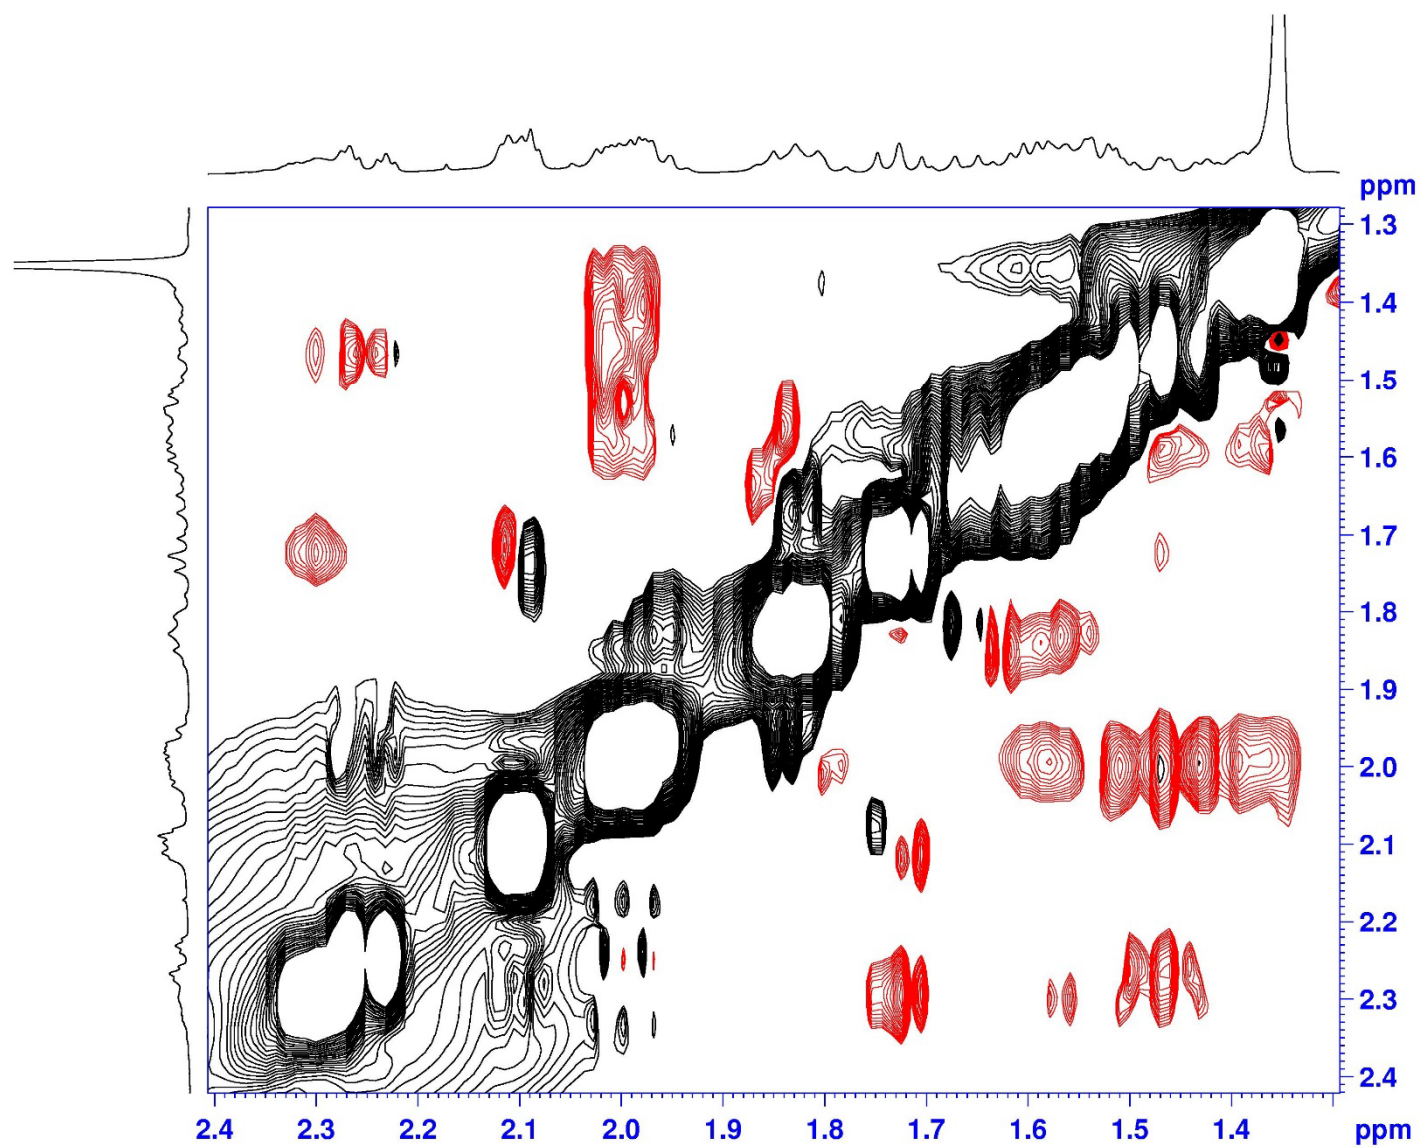

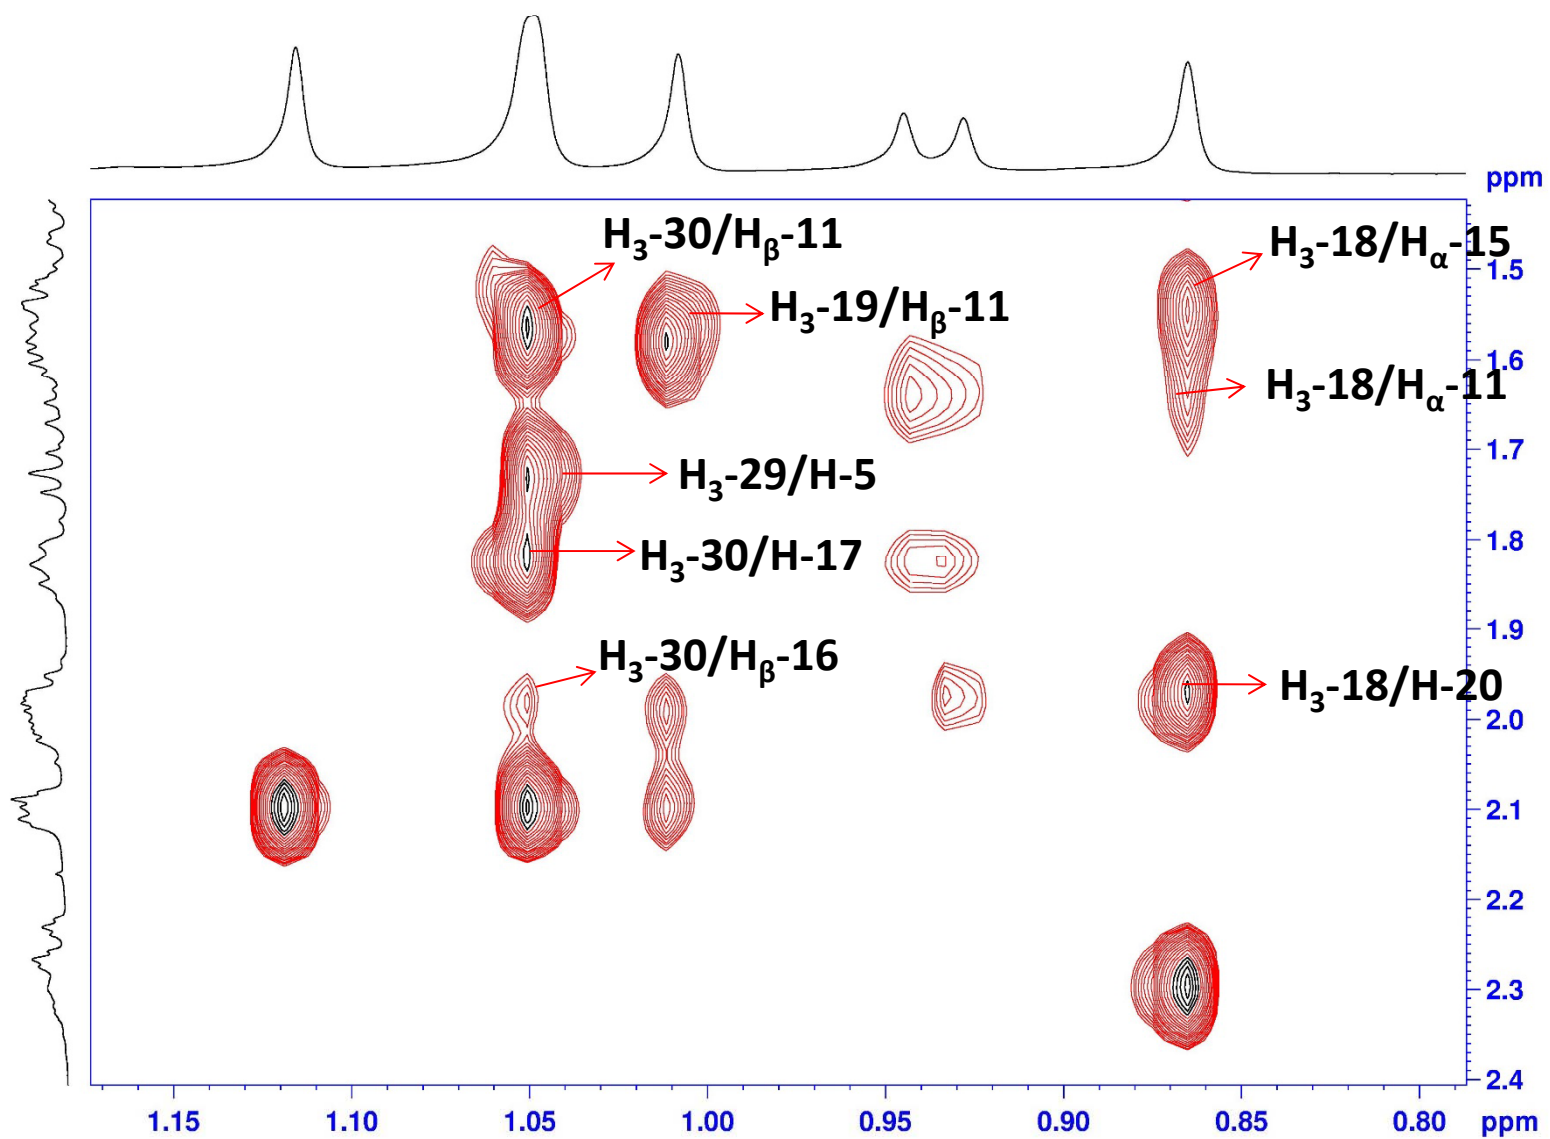



## HR-ESIMS for compound 2

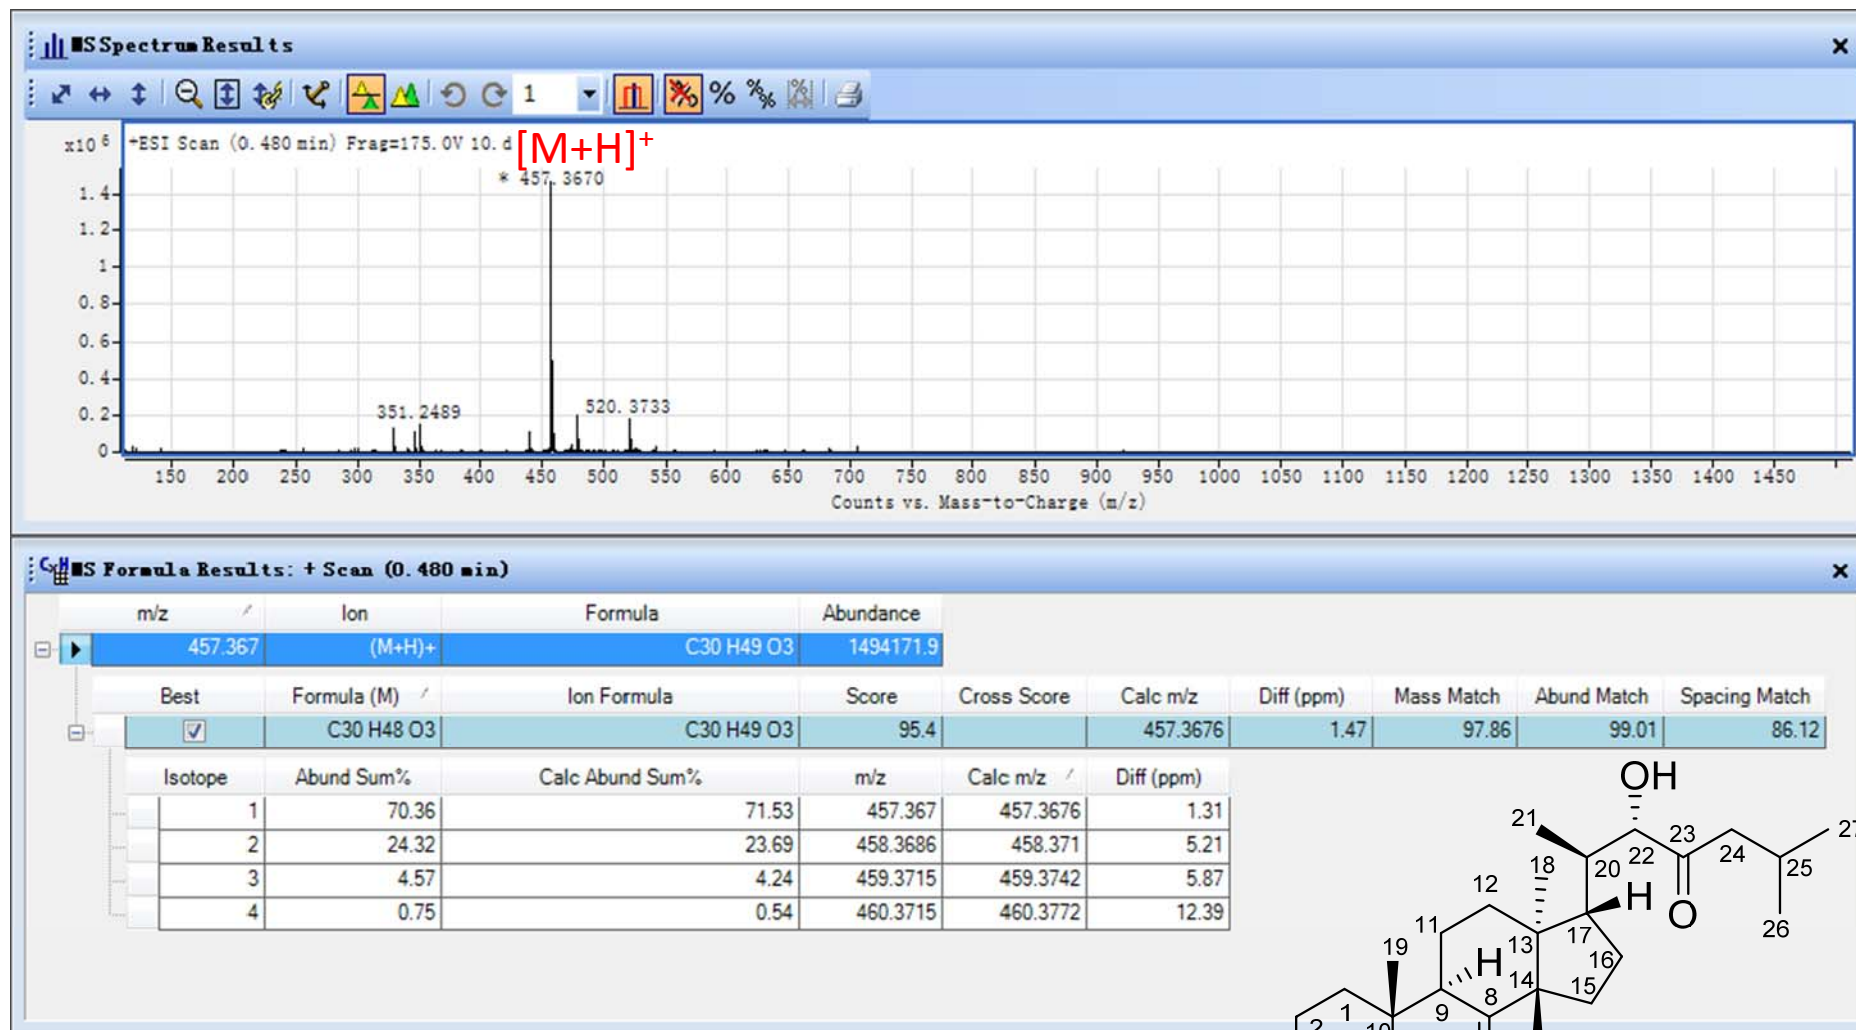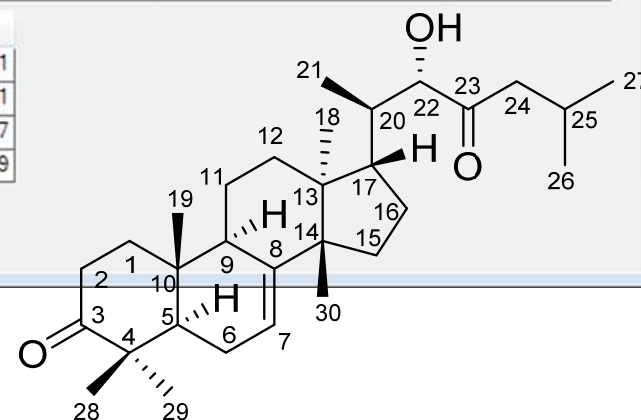

$^1\text{H}$  NMR (400 MHz) spectrum of compound **2** in  $\text{CDCl}_3$

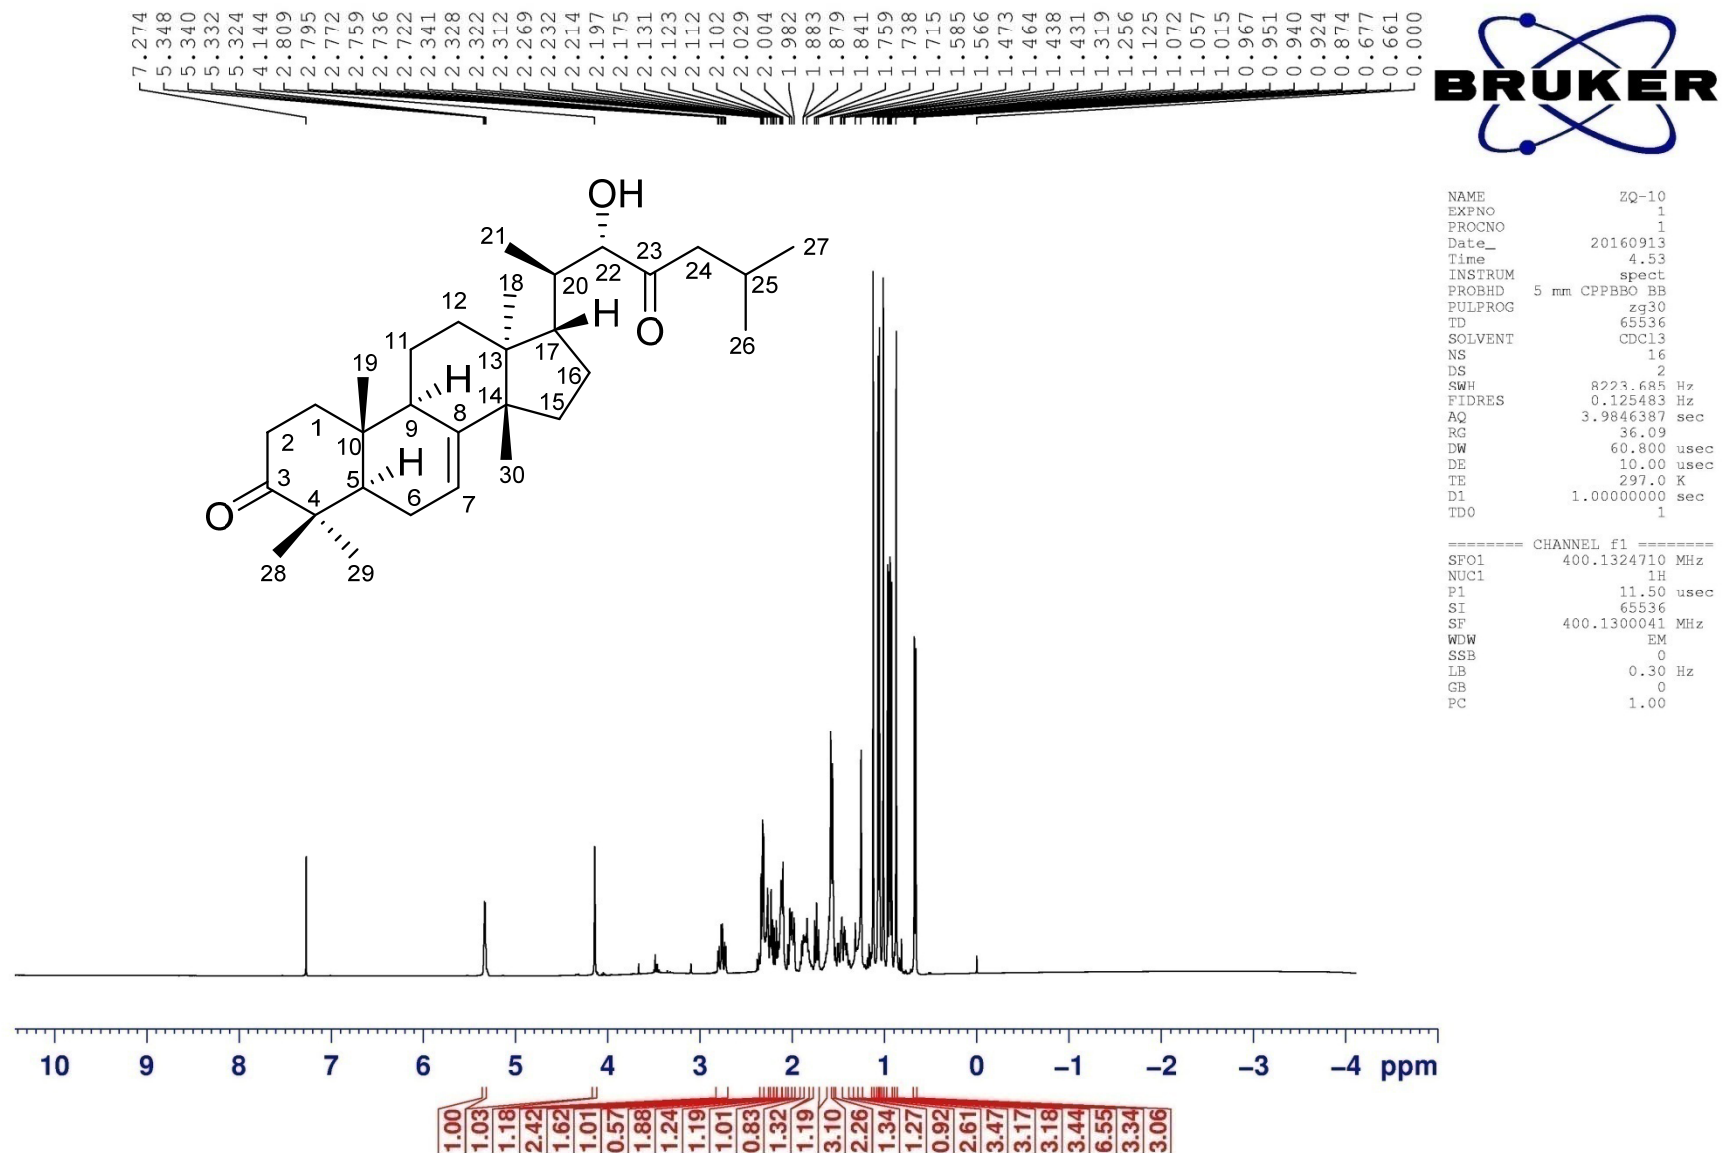



$^1\text{H}$  NMR (400 MHz) spectrum of compound **2** in  $\text{CDCl}_3$

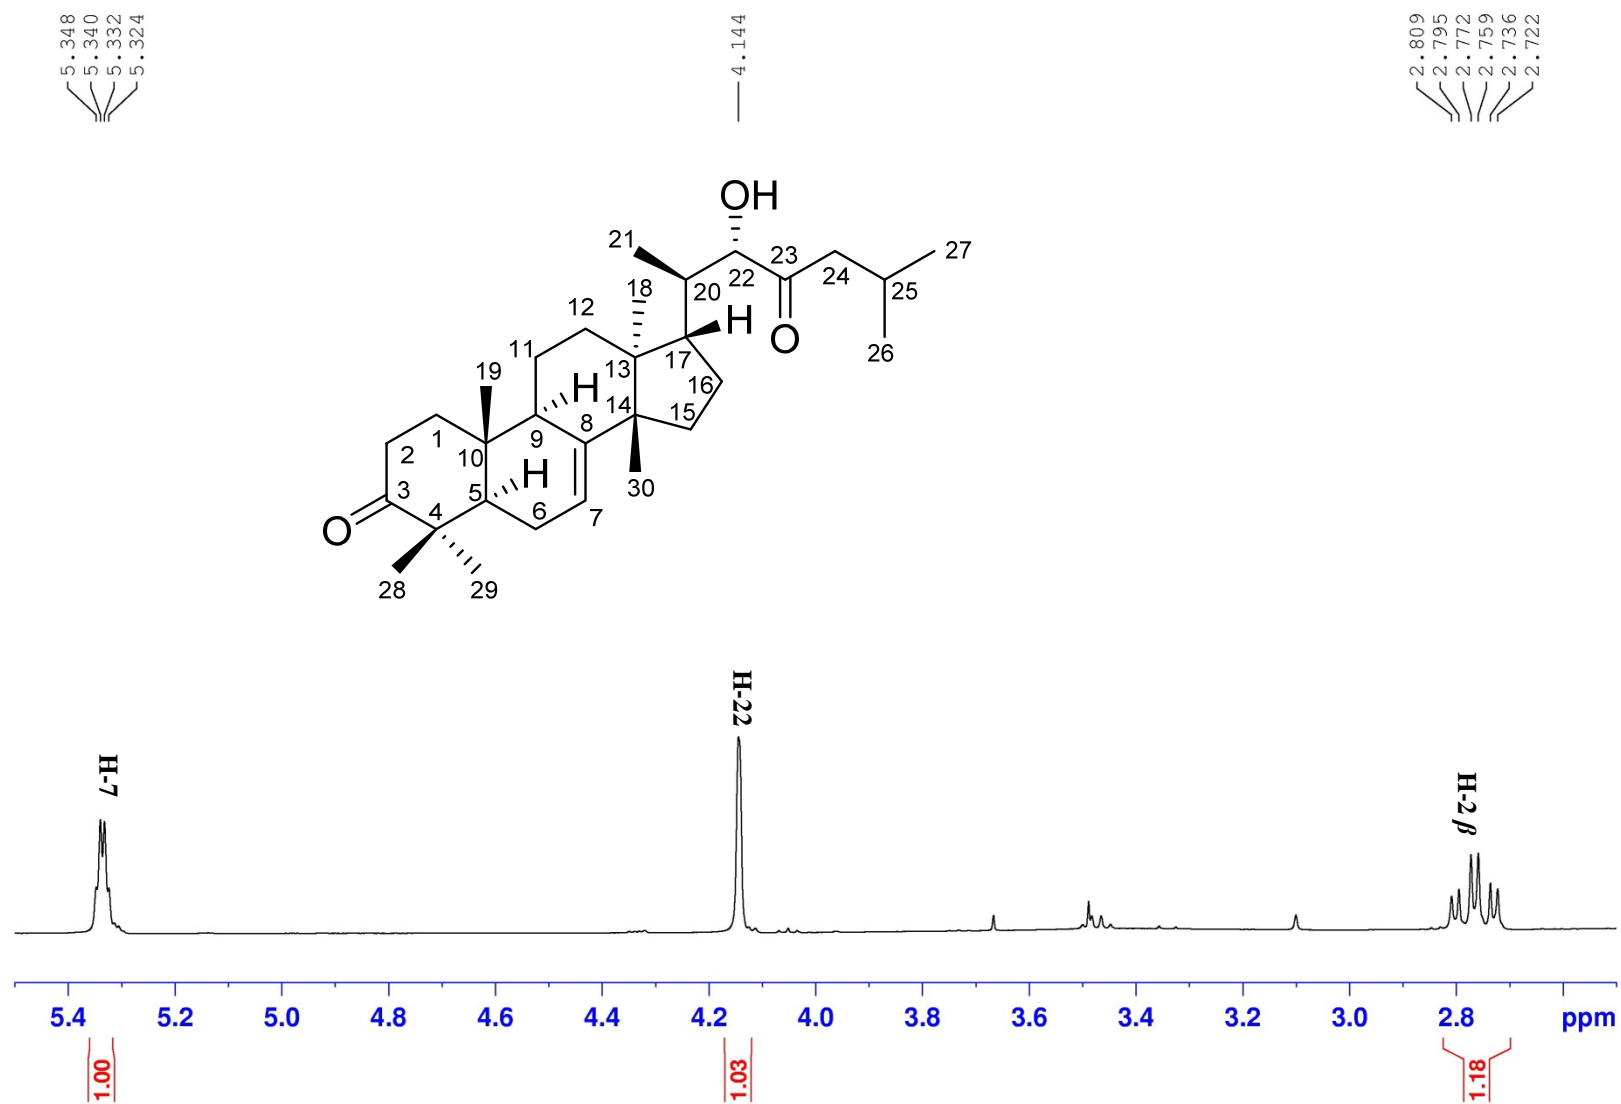

$^1\text{H}$  NMR (400 MHz) spectrum of compound **2** in  $\text{CDCl}_3$

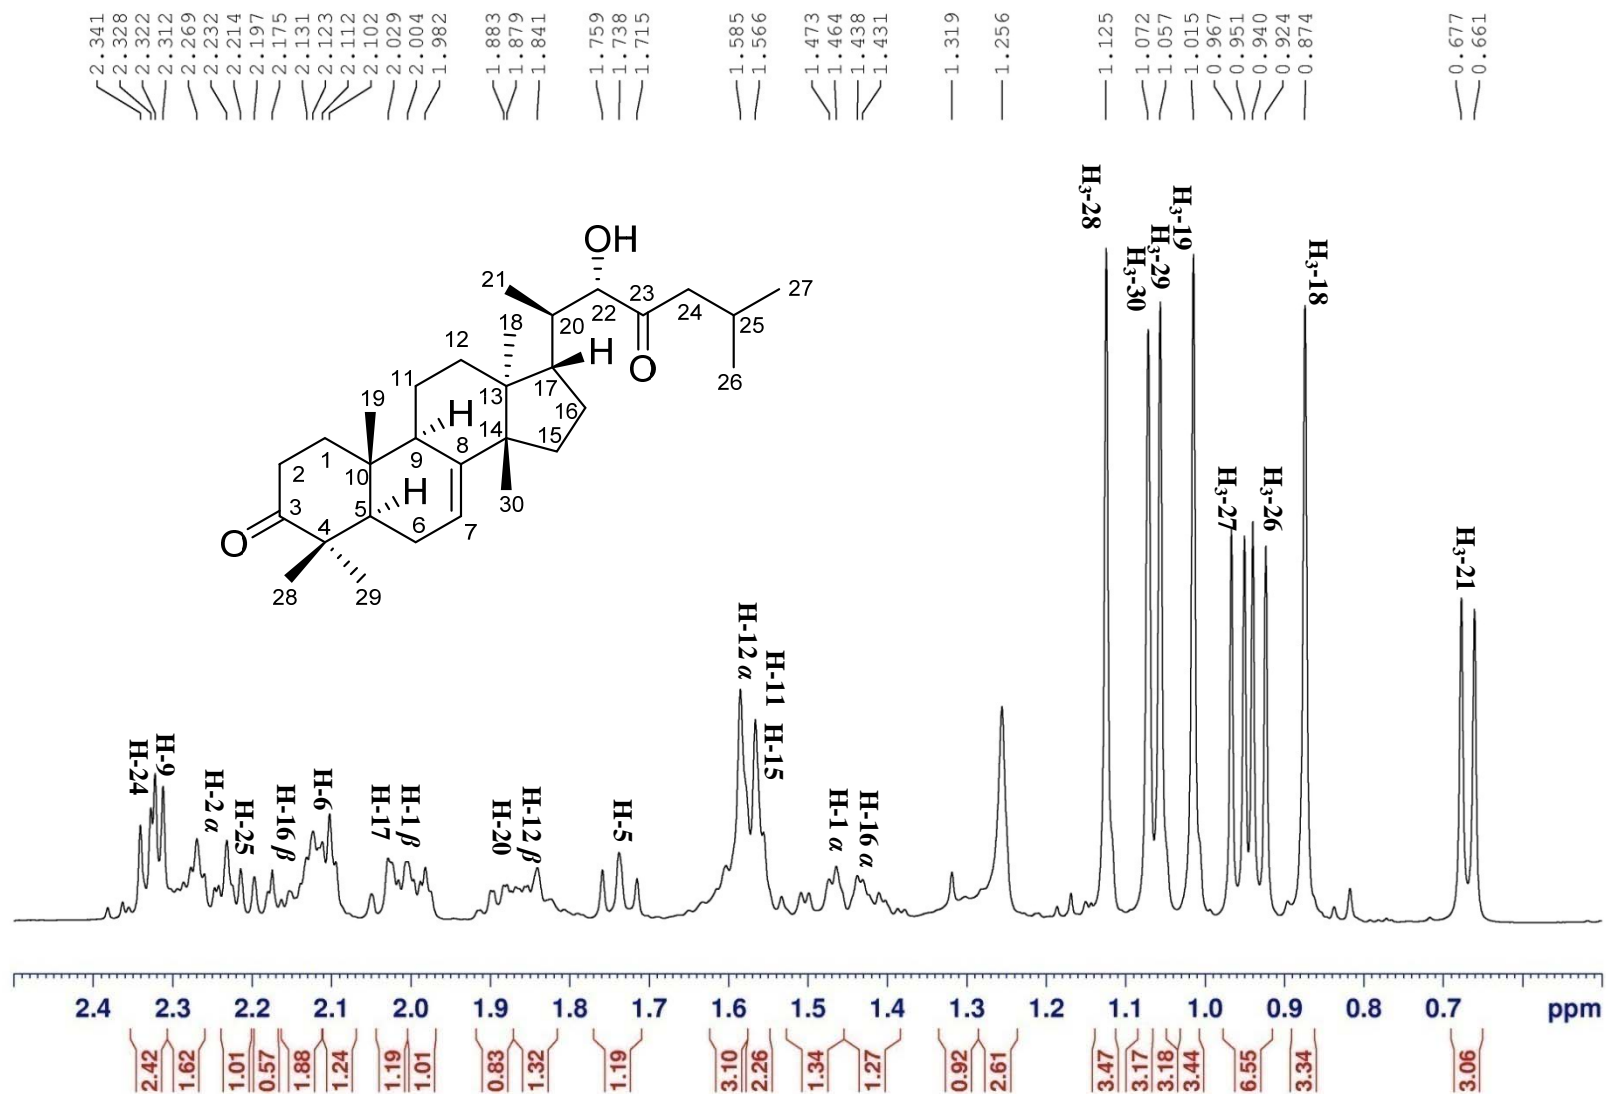

# $^{13}\text{C}$ NMR (100 MHz) spectrum of compound **2** in $\text{CDCl}_3$

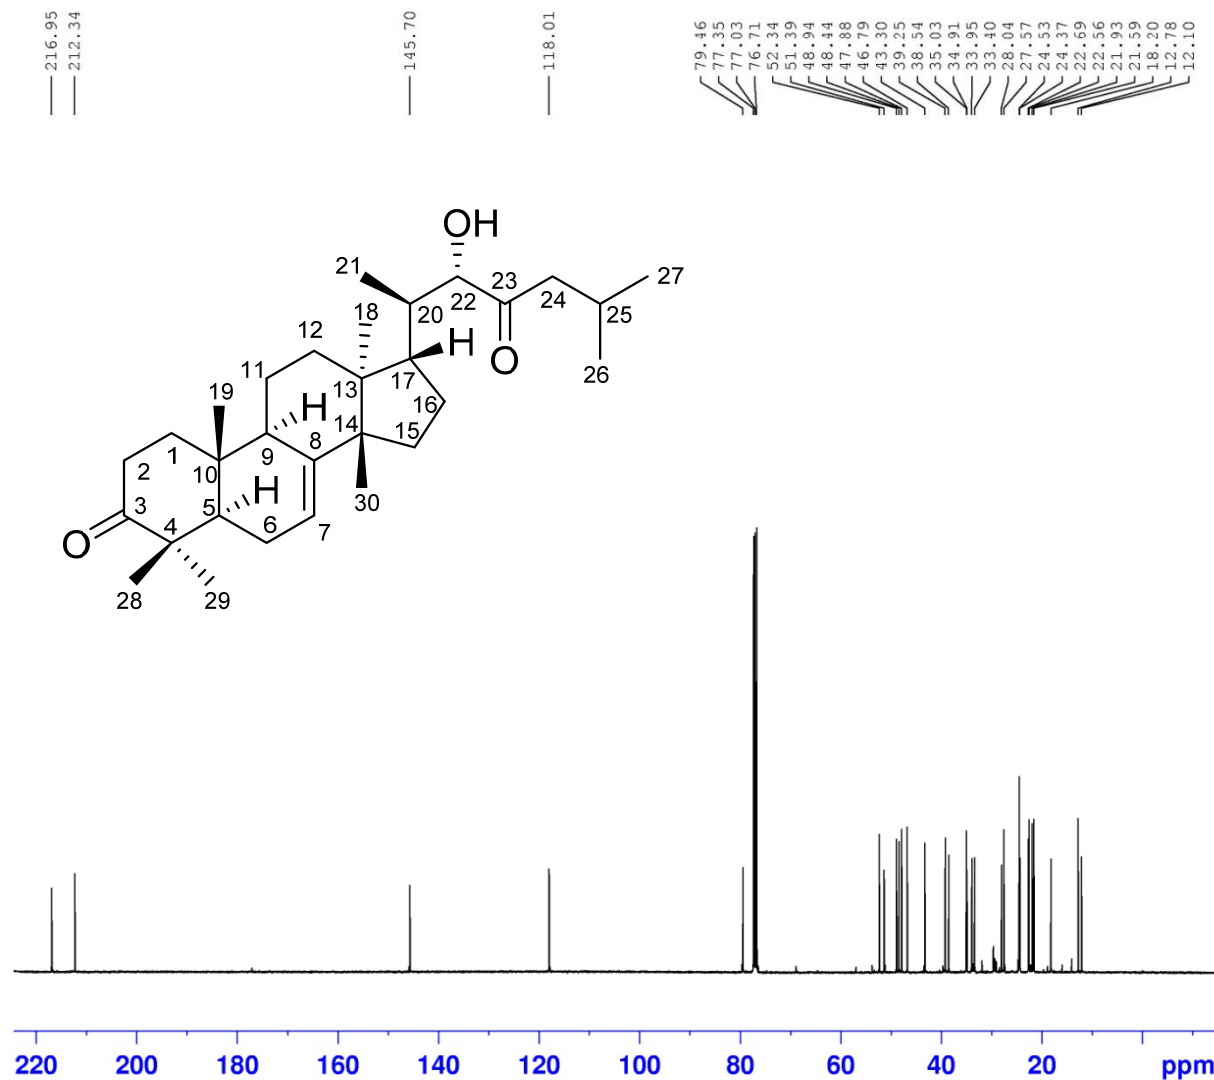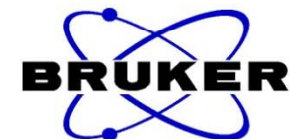

```

NAME          ZQ-10-1
EXPNO         2
PROCNO        1
Date_         20160913
Time          5.53
INSTRUM       spect
PROBHD        5 mm CPPBBO BB
PULPROG       zgpg30
TD            65536
SOLVENT       CDCl3
NS            1024
DS            4
SWH           24038.461 Hz
FIDRES        0.366798 Hz
AQ            1.3631988 sec
RG            73.92
DW            20.800 usec
DE            18.00 usec
TE            297.0 K
D1            2.00000000 sec
D11           0.03000000 sec
TD0           1
    
```

```

===== CHANNEL f1 =====
SF01          100.6233324 MHz
NUC1           13C
P1            10.00 usec
SI            32768
SF            100.6127698 MHz
WDW           EM
SSB           0
LB            1.00 Hz
GB            0
PC            1.40
    
```

$^{13}\text{C}$  NMR (100 MHz) spectrum of compound **2** in  $\text{CDCl}_3$

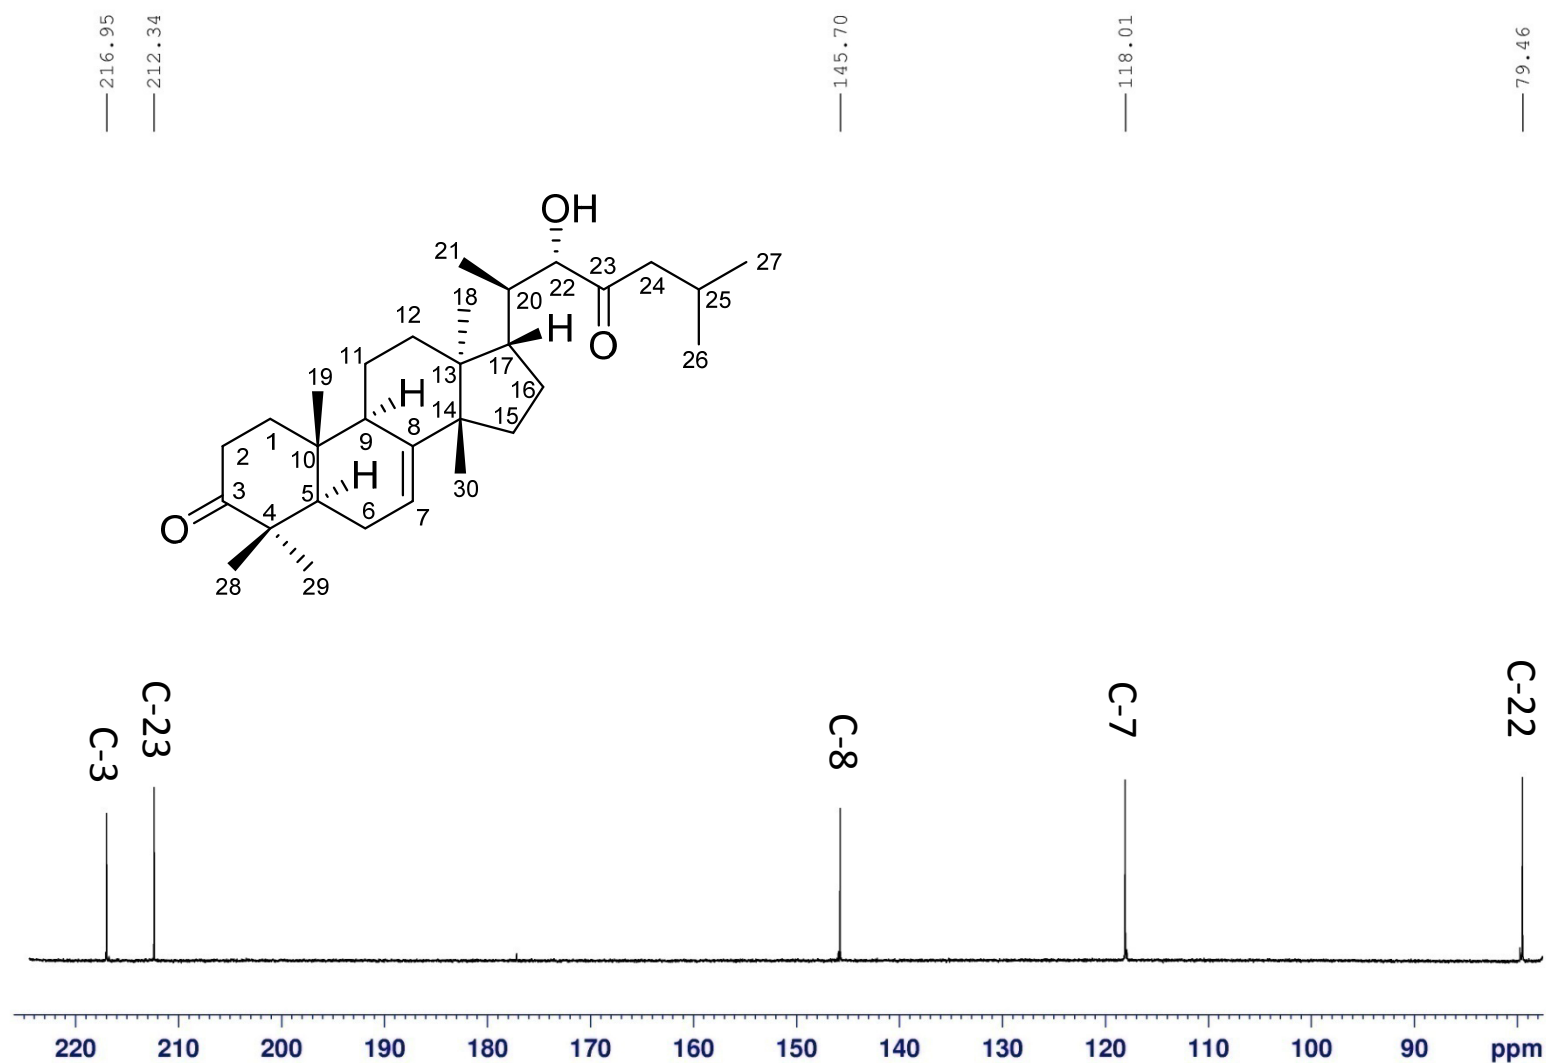

$^{13}\text{C}$  NMR (100 MHz) spectrum of compound **2** in  $\text{CDCl}_3$

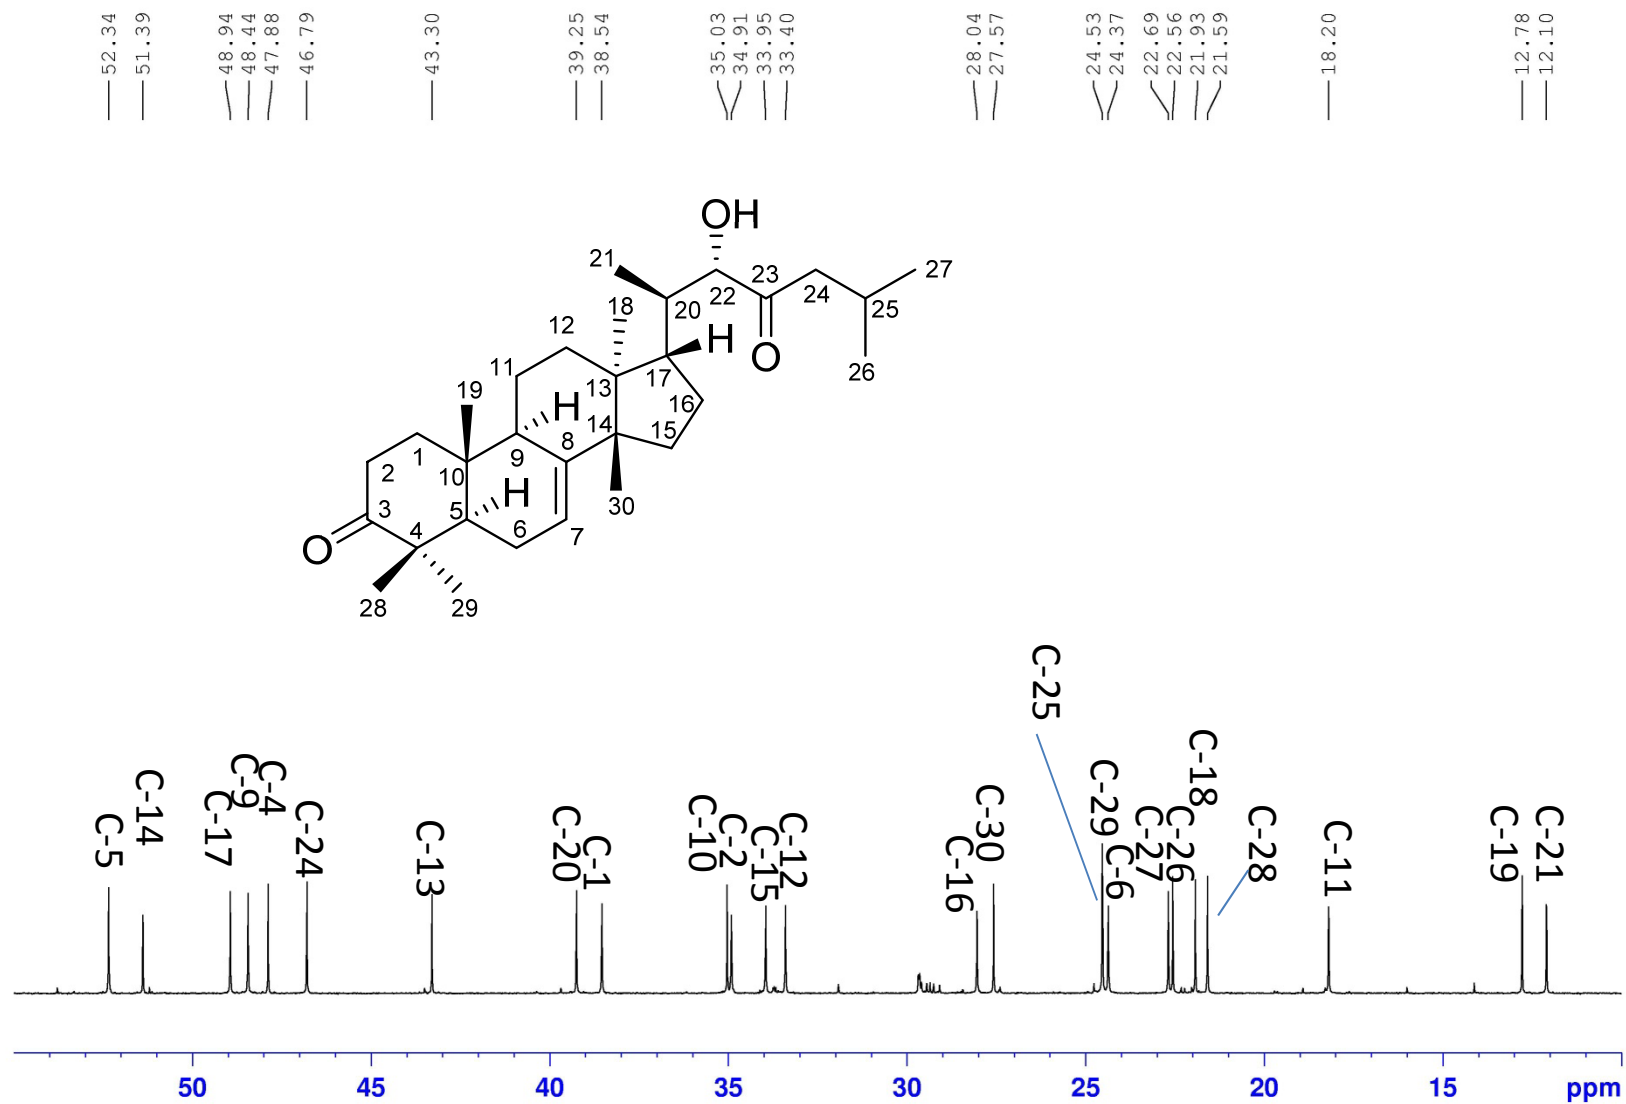

# DEPT135 (100 MHz) spectrum of compound **2** in CDCl<sub>3</sub>

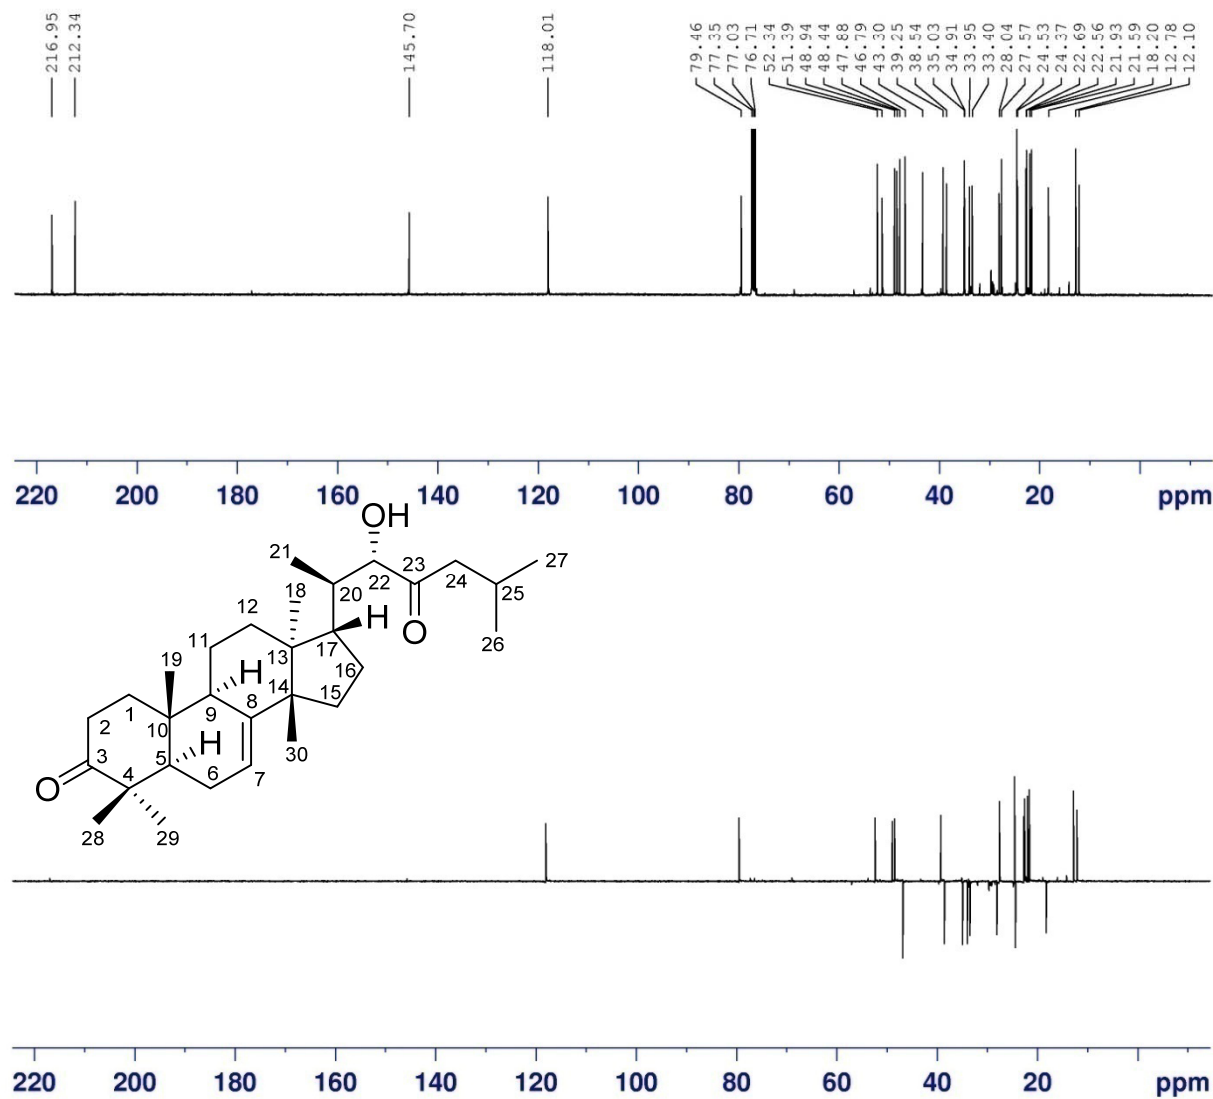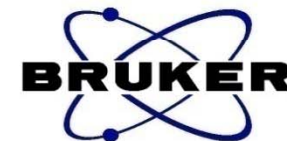

```

NAME          ZQ-10-1
EXPNO         3
PROCNO        1
Date_         20160913
Time          6.11
INSTRUM       spect
PROBHD        5 mm CPPBBO BB
PULPROG       deptsp135
TD            65536
SOLVENT       CDCl3
NS            300
DS            4
SWH           24038.461 Hz
FIDRES        0.366798 Hz
AQ            1.3631988 sec
RG            91.64
DW            20.800 usec
DE            18.00 usec
TE            297.0 K
CNST2         145.0000000
D1            2.00000000 sec
D2            0.00344828 sec
D12           0.00002000 sec
TD0           1
    
```

```

===== CHANNEL f1 =====
SFO1         100.6233324 MHz
NUC1          13C
P1            10.00 usec
P13           2000.00 usec
SI            32768
SF            100.6127698 MHz
WDW           EM
SSB           0
LB            1.00 Hz
GB            0
PC            1.40
    
```

DEPT135 (100 MHz) spectrum of compound **2** in CDCl<sub>3</sub>

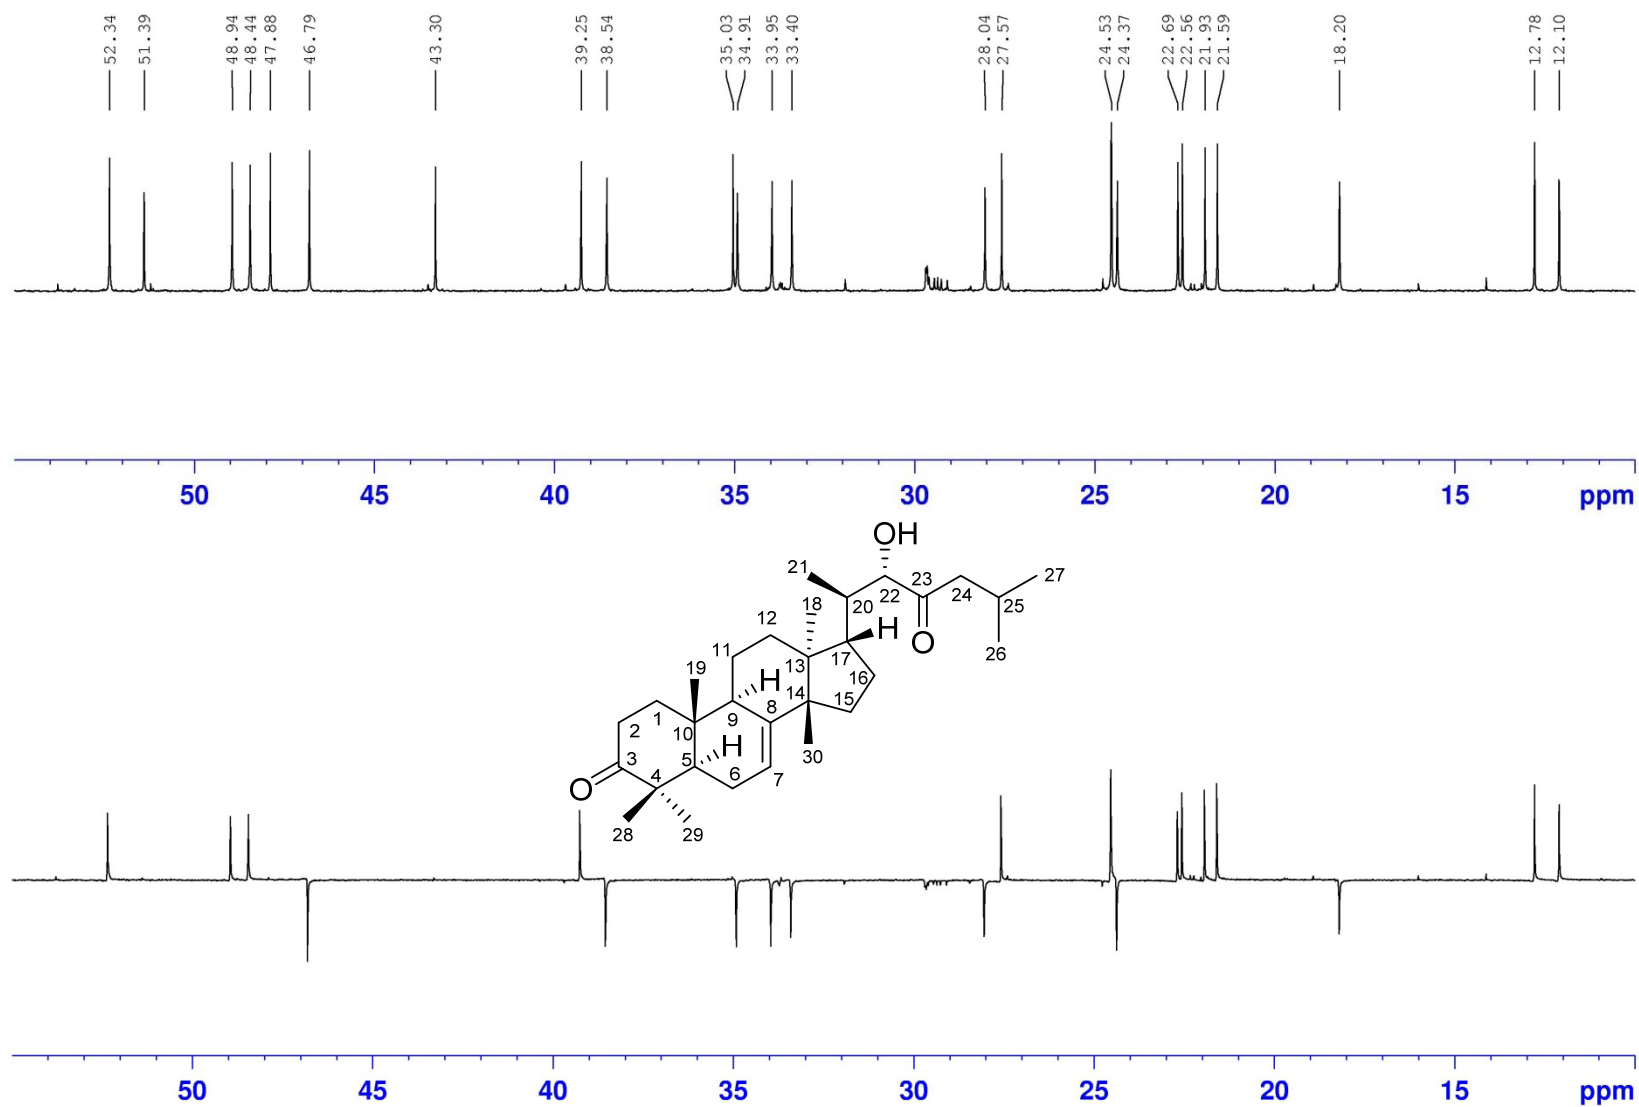

$^1\text{H}$ - $^1\text{H}$  COSY (400 MHz) spectrum of compound **2** in  $\text{CDCl}_3$

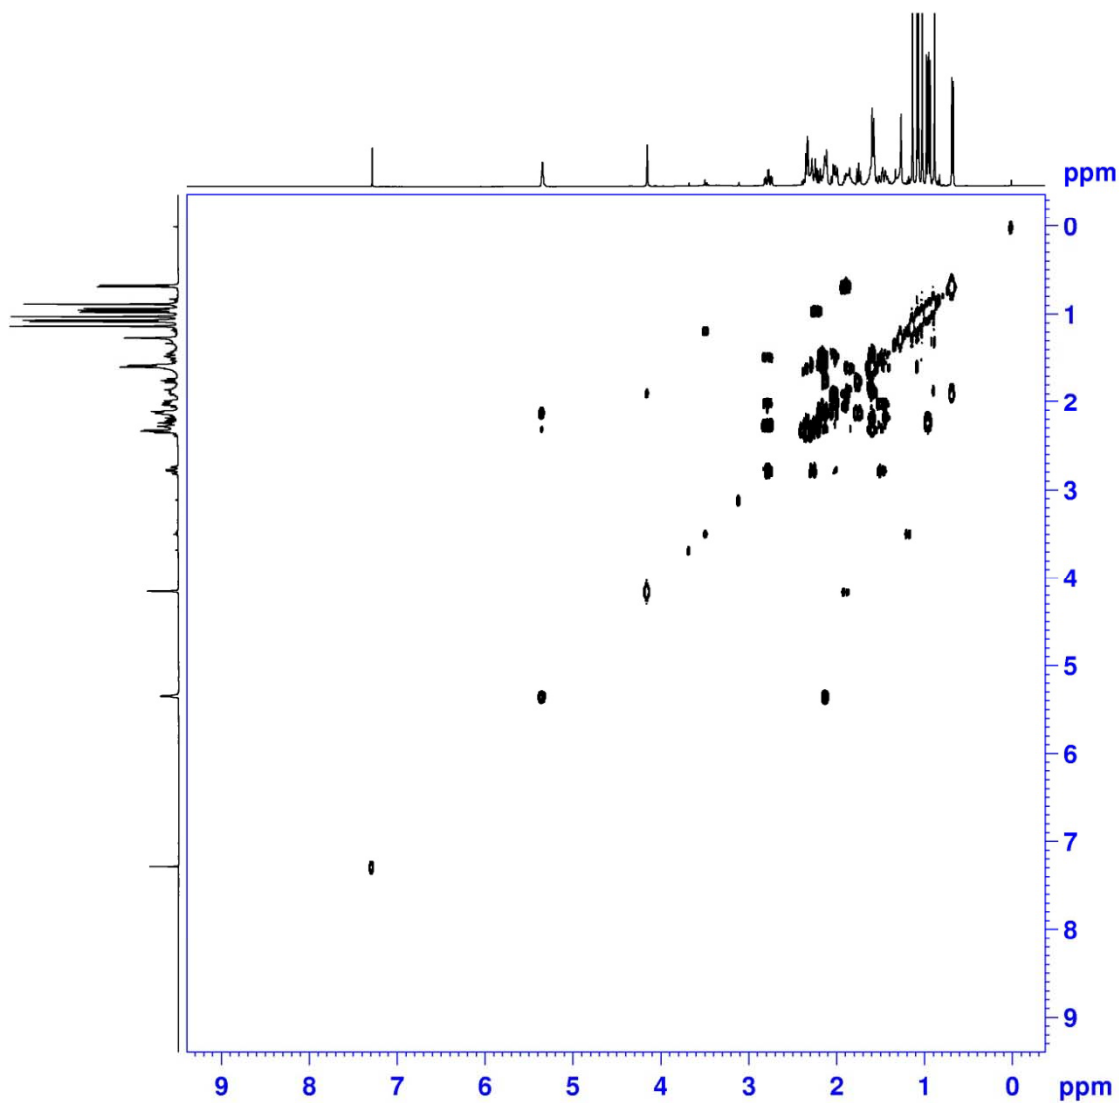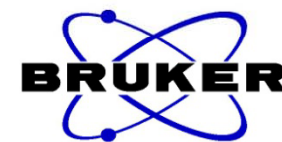

```

NAME           ZQ-10-1
EXPNO           4
PROCNO          1
Date_          20160929
Time            12.09
INSTRUM         spect
PROBHD          5 mm CPPBBO BB
PULPROG         cosygpppqf
TD              2048
SOLVENT         CDCl3
NS               8
DS               8
SWH             3906.250 Hz
FIDRES          1.907349 Hz
AQ              0.2621940 sec
RG              36.09
DW              128.000 usec
DE              10.00 usec
TE              297.0 K
D0              0.00000300 sec
D1              1.89678097 sec
D11             0.03000000 sec
D12             0.00002000 sec
D13             0.00000400 sec
D16             0.00020000 sec
IN0             0.00025600 sec
    
```

```

===== CHANNEL f1 =====
SFO1          400.1318006 MHz
NUC1           1H
P0             11.50 usec
P1             11.50 usec
P17            2500.00 usec
ND0            1
TD             128
SFO1          400.1318 MHz
FIDRES         30.517578 Hz
SW             9.762 ppm
FnMODE         QF
SI             1024
SF            400.1299966 MHz
WDW            QSINE
SSB            0
LB             0.00 Hz
GB             0
PC             1.40
SI             1024
MC2            QF
SF            400.1299937 MHz
WDW            OSINE
    
```



$^1\text{H}$ - $^1\text{H}$  COSY (400 MHz) spectrum of compound **2** in  $\text{CDCl}_3$

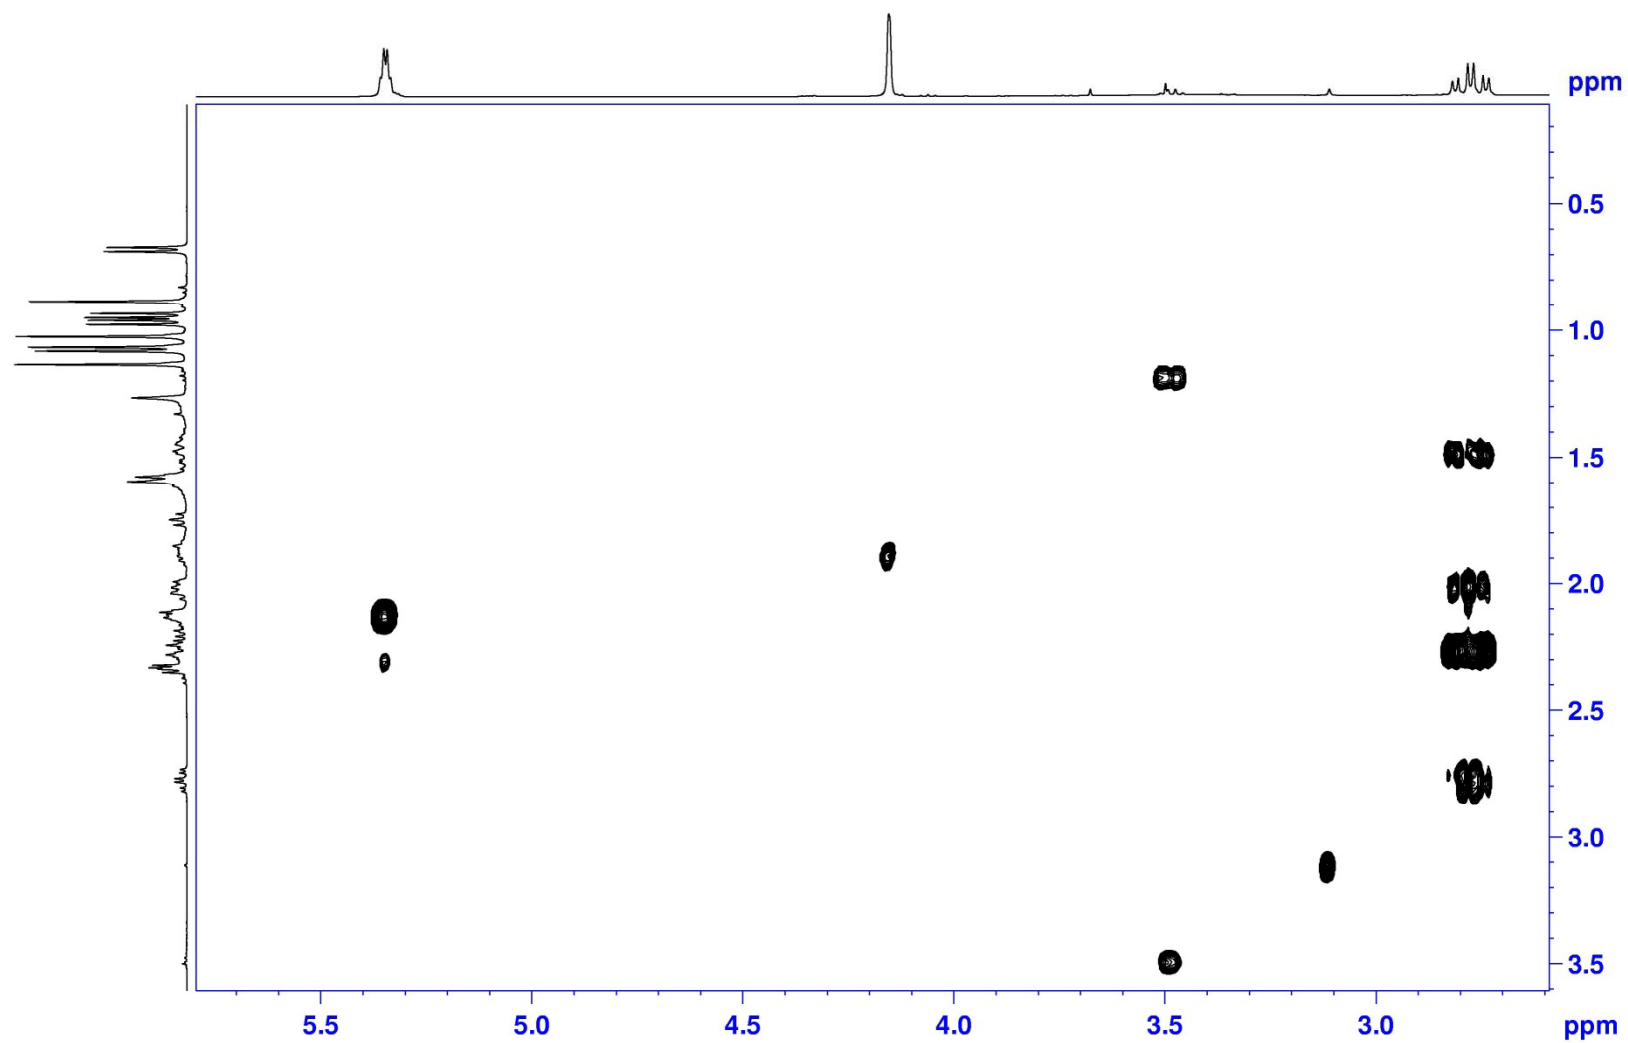

$^1\text{H}$ - $^1\text{H}$  COSY (400 MHz) spectrum of compound **2** in  $\text{CDCl}_3$

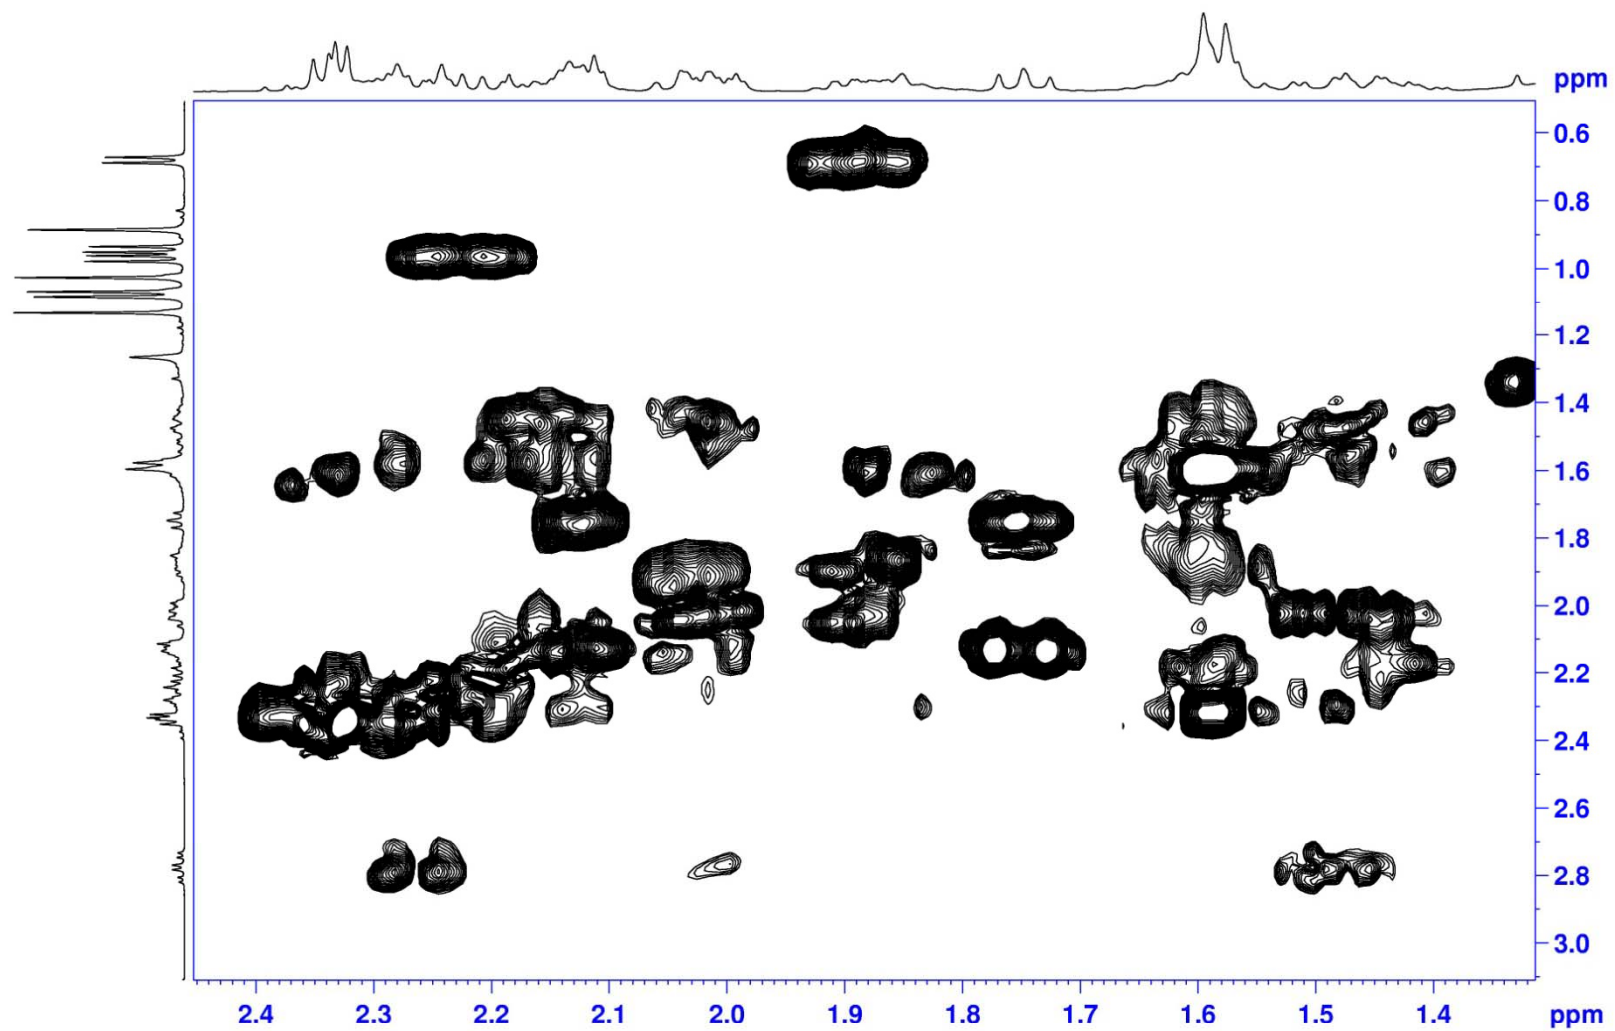

# HSQC (400 MHz) spectrum of compound **2** in CDCl<sub>3</sub>

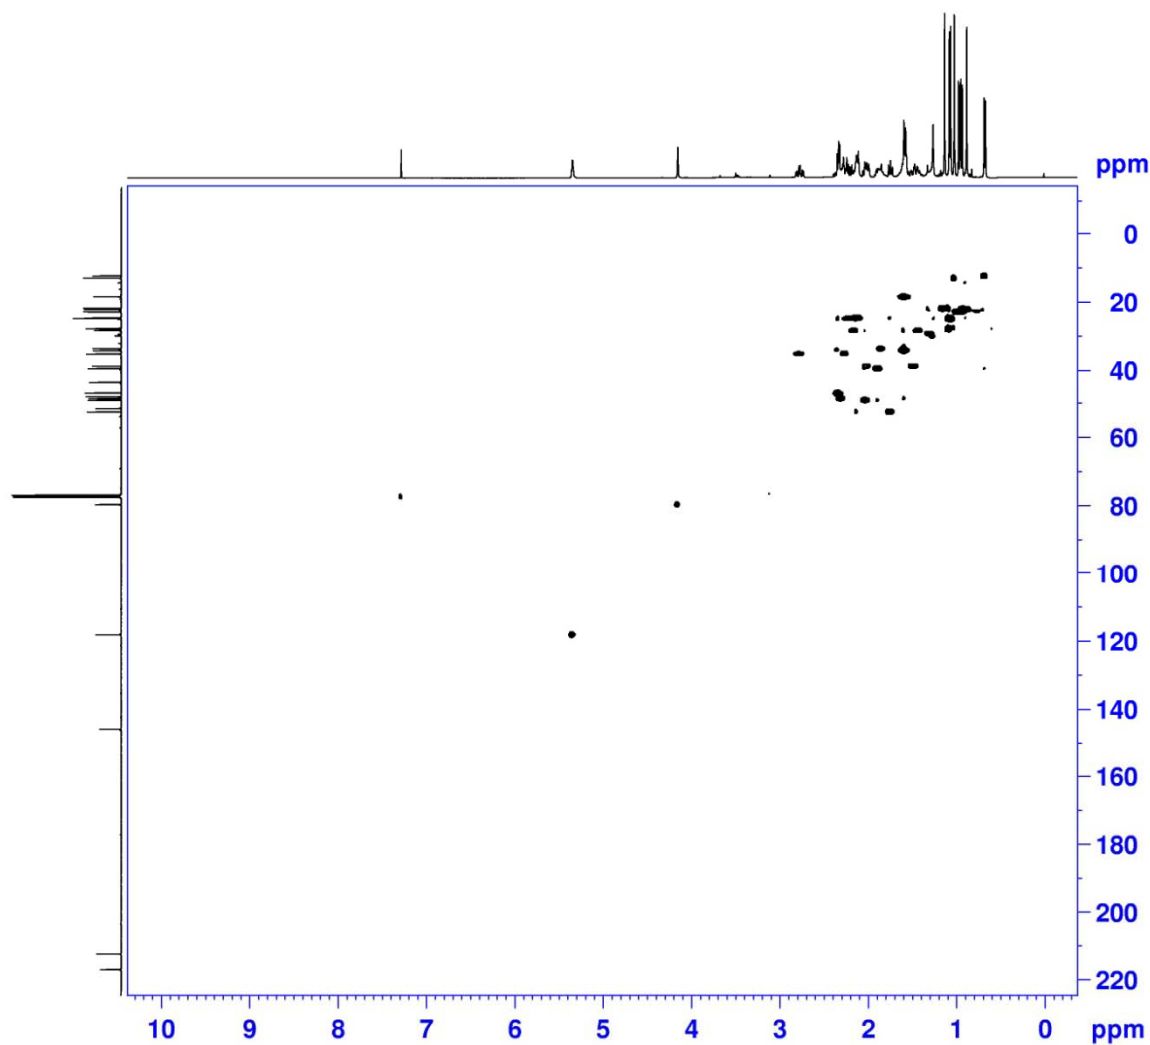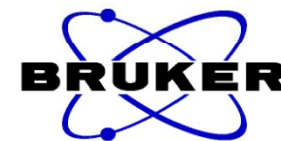

```

NAME           ZQ-10-1
EXPNO           5
PROCNO          1
Date_           20160929
Time            12.48
INSTRUM         spect
PROBHD          5 mm CPPBBO BB
PULPROG         hsqcetgpsi2
TD              1024
SOLVENT         CDCl3
NS              16
DS              16
SWH             4302.926 Hz
FIDRES          4.202076 Hz
AQ              0.1190388 sec
RG              208.5
DW              116.200 usec
DE              10.00 usec
TE              297.0 K
CNST2           145.0000000
D0              0.00000300 sec
D1              1.46497905 sec
D4              0.00172414 sec
D11             0.030000000 sec
D16             0.00020000 sec
D24             0.00086207 sec
IN0             0.00002080 sec
ZGOPTNS

===== CHANNEL f1 =====
SF01            400.1320007 MHz
NUC1            1H
P1              11.50 usec
P2              23.00 usec
P28             0.00 usec
ND0             2
TD              256
SF01            100.6233 MHz
FIDRES          93.900238 Hz
SW              238.896 ppm
FnMODE          Echo-Antiecho
SI              1024
SF              400.1299963 MHz
WDW             QSINE
SSB             2
LB              0.00 Hz
GB              0
PC              1.40
SI              1024
MC2            echo-antiecho
SF              100.6127561 MHz
WDW             QSINE
SSB             2
LB              0.00 Hz
    
```

HSQC (400 MHz) spectrum of compound **2** in CDCl<sub>3</sub>

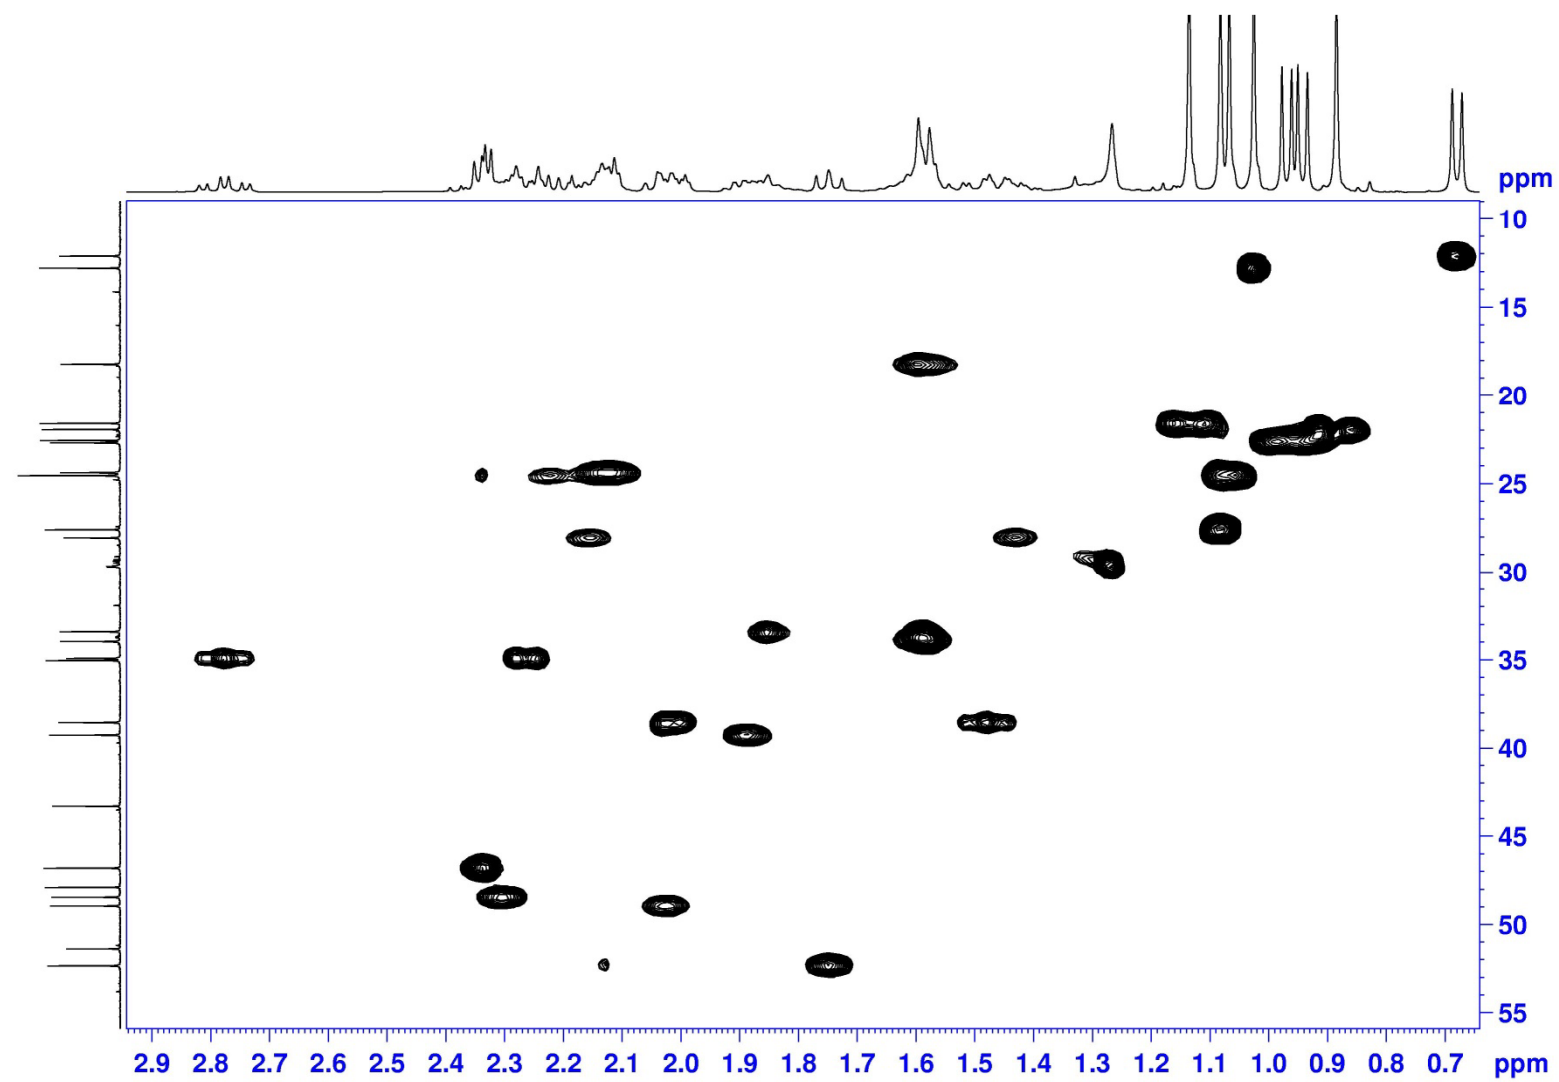

# HMBC (400 MHz) spectrum of compound **2** in CDCl<sub>3</sub>

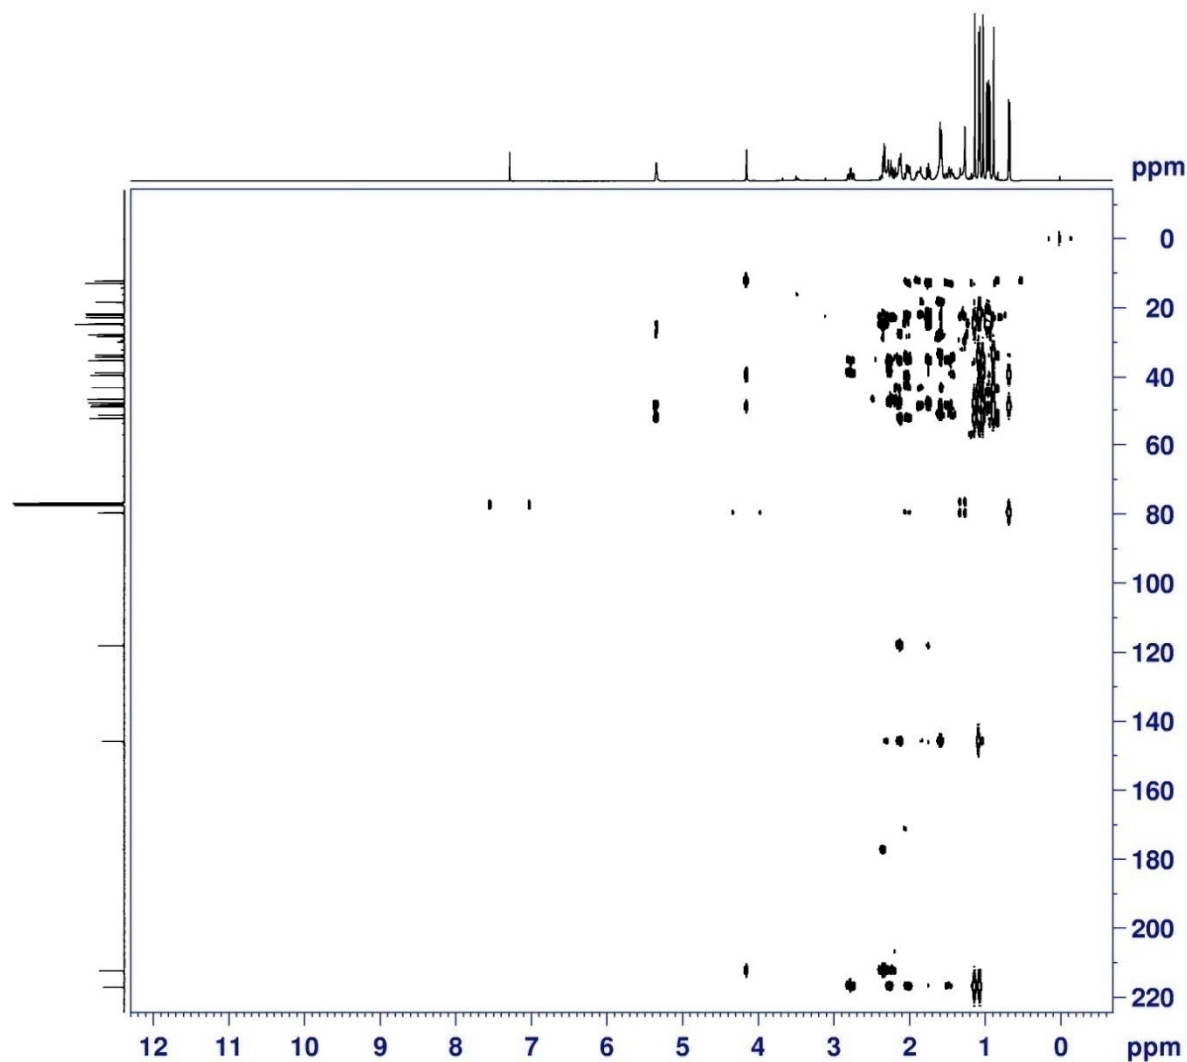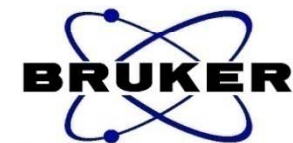

```

NAME          ZQ-10-1
EXPNO          6
PROCNO         1
Date_         20160929
Time          14.40
INSTRUM        spect
PROBHD         5 mm CPPBBO BB
PULPROG        hmbcgp1pndqf
TD             4096
SOLVENT        CDCl3
NS             32
DS             16
SWH            5197.505 Hz
FIDRES         1.268922 Hz
AQ             0.3940852 sec
RG             208.5
DW             96.200 usec
DE             10.00 usec
TE             297.0 K
CNST2          145.0000000
CNST13         10.0000000
D0             0.00000300 sec
D1             1.50000000 sec
D2             0.00344828 sec
D6             0.05000000 sec
D16            0.00020000 sec
IN0            0.00002080 sec
  
```

```

===== CHANNEL f1 =====
SFO1          400.1323208 MHz
NUC1           1H
P1             11.50 usec
P2             23.00 usec
ND0            2
TD            128
SFO1          100.6233 MHz
FIDRES         187.800476 Hz
SW             238.896 ppm
FnMODE         QF
SI             2048
SF            400.1299977 MHz
WDW            SINE
SSB            0
LB             0.00 Hz
GB            0
PC             1.40
SI            1024
MC2            QF
SF            100.6127709 MHz
WDW            SINE
SSB            0
LB             0.00 Hz
GR            0
  
```

HMBC (400 MHz) spectrum of compound **2** in CDCl<sub>3</sub>

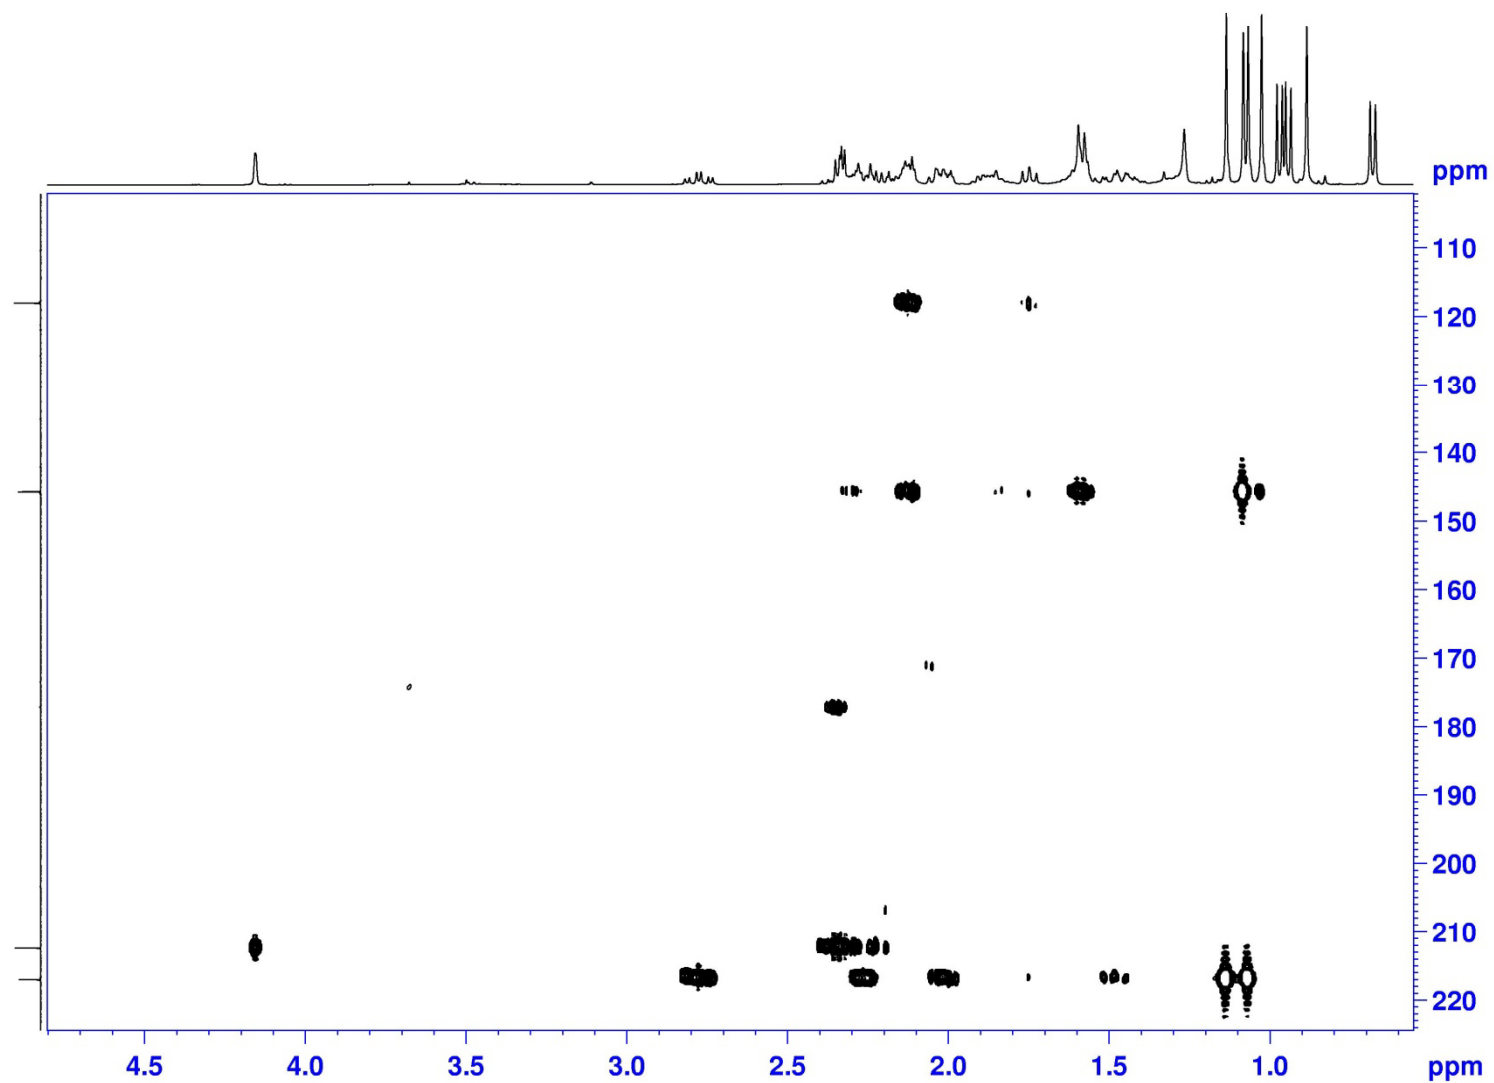

HMBC (400 MHz) spectrum of compound **2** in CDCl<sub>3</sub>

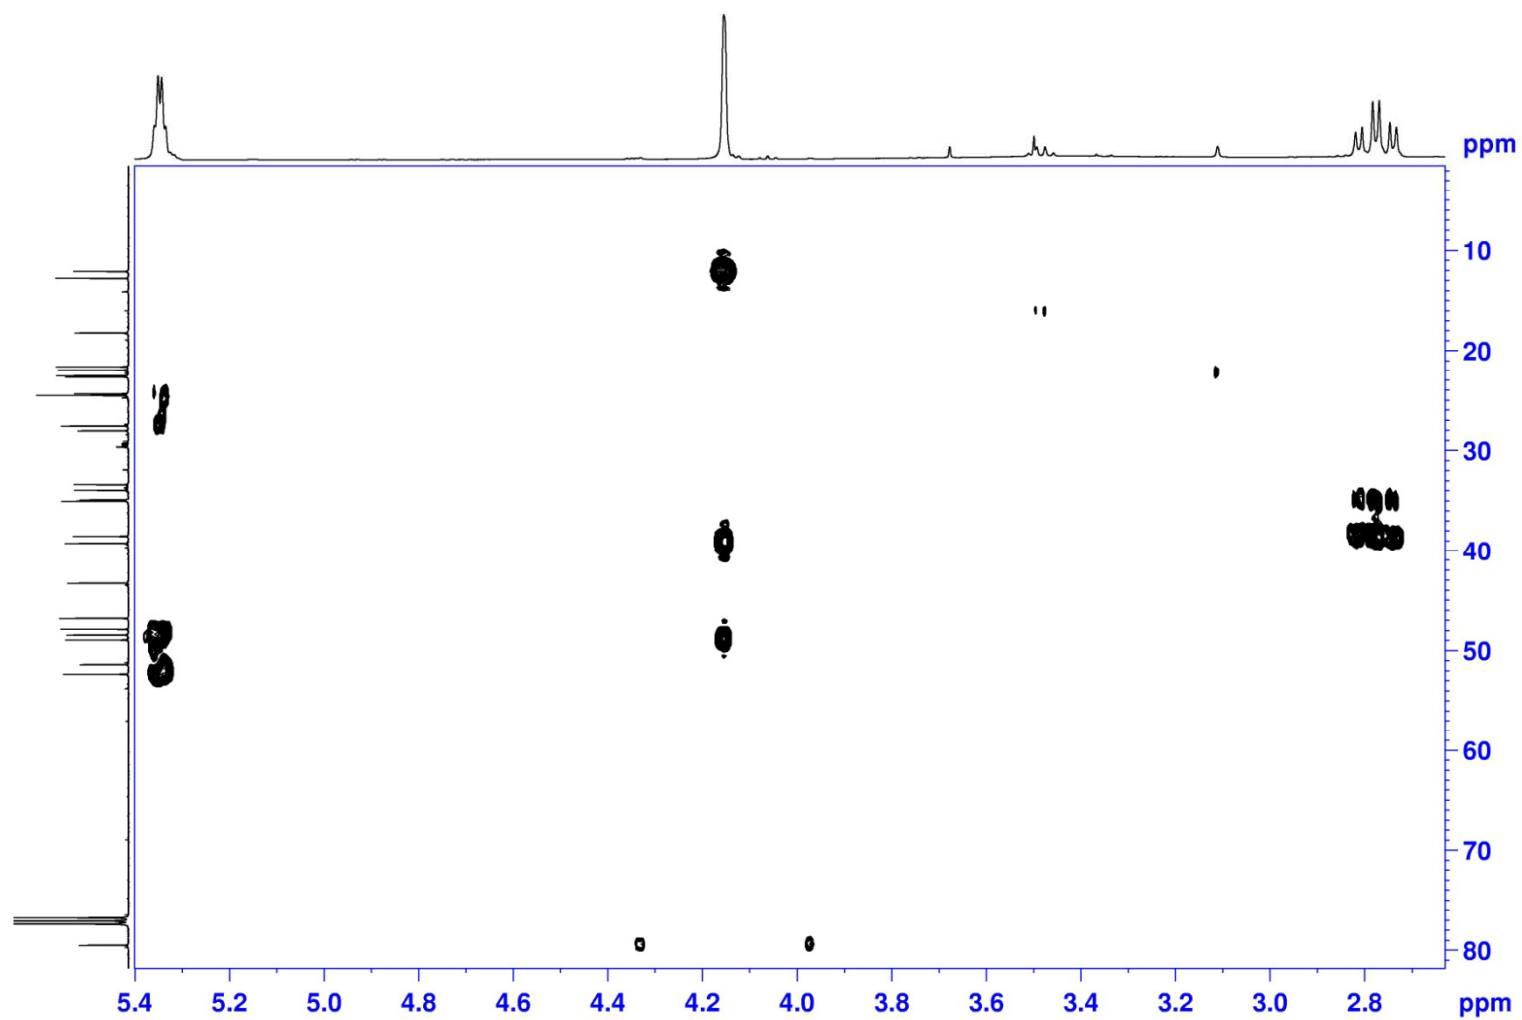

HMBC (400 MHz) spectrum of compound **2** in CDCl<sub>3</sub>

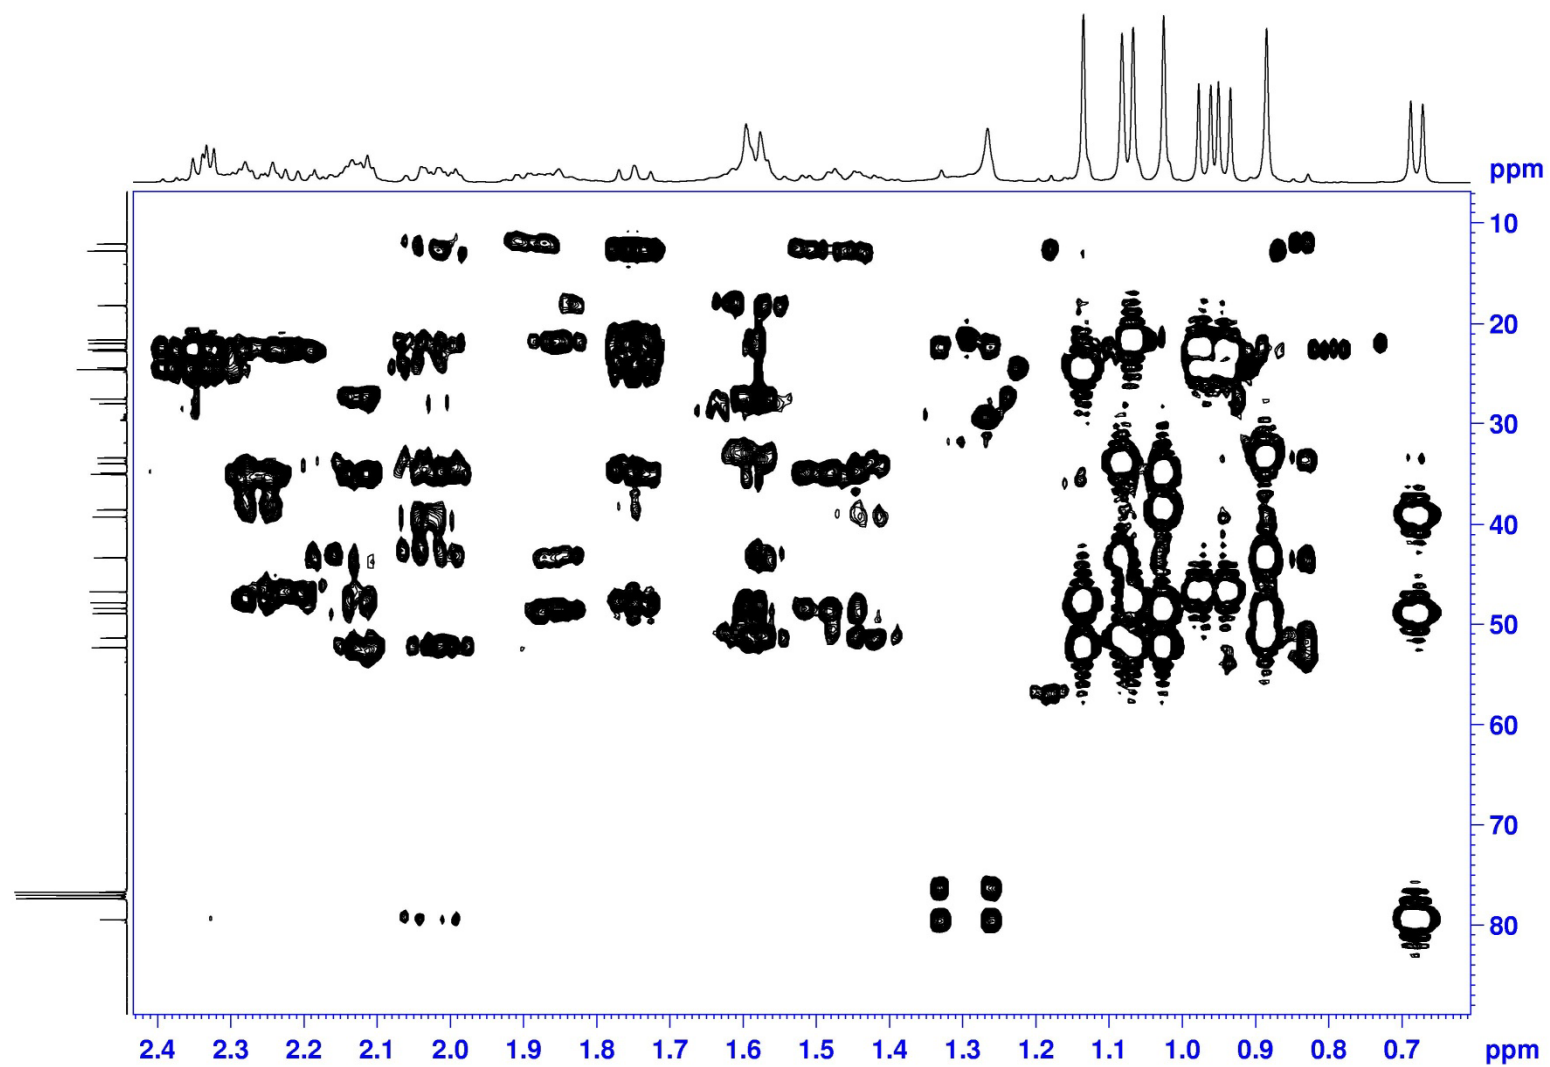



HMBC (400 MHz) spectrum of compound **2** in  $\text{CDCl}_3$

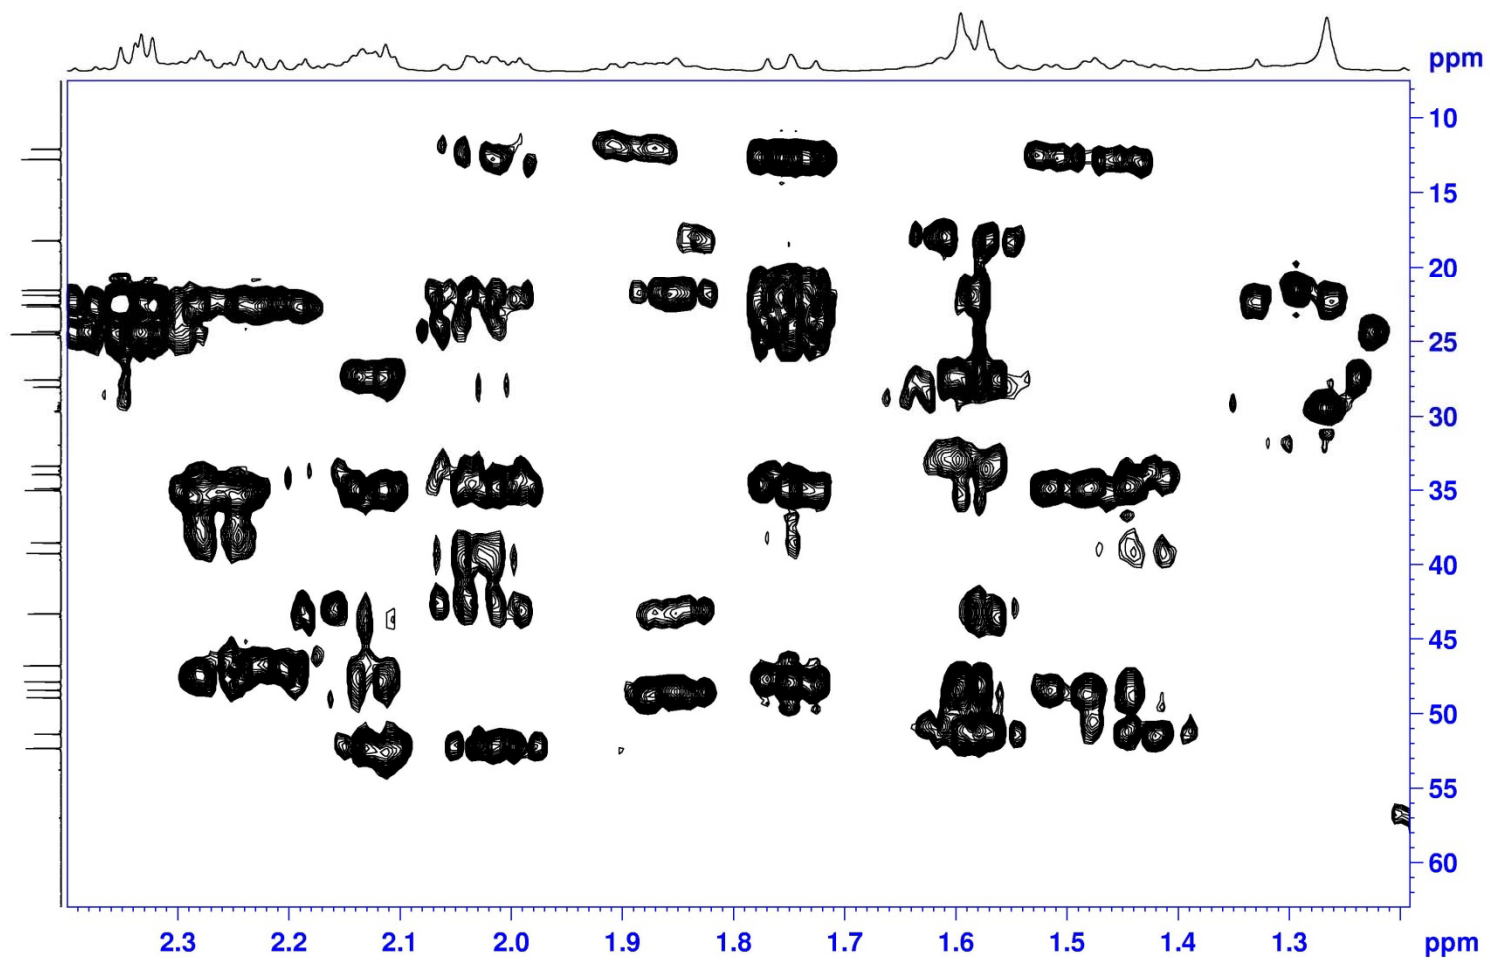

HMBC (400 MHz) spectrum of compound **2** in CDCl<sub>3</sub>

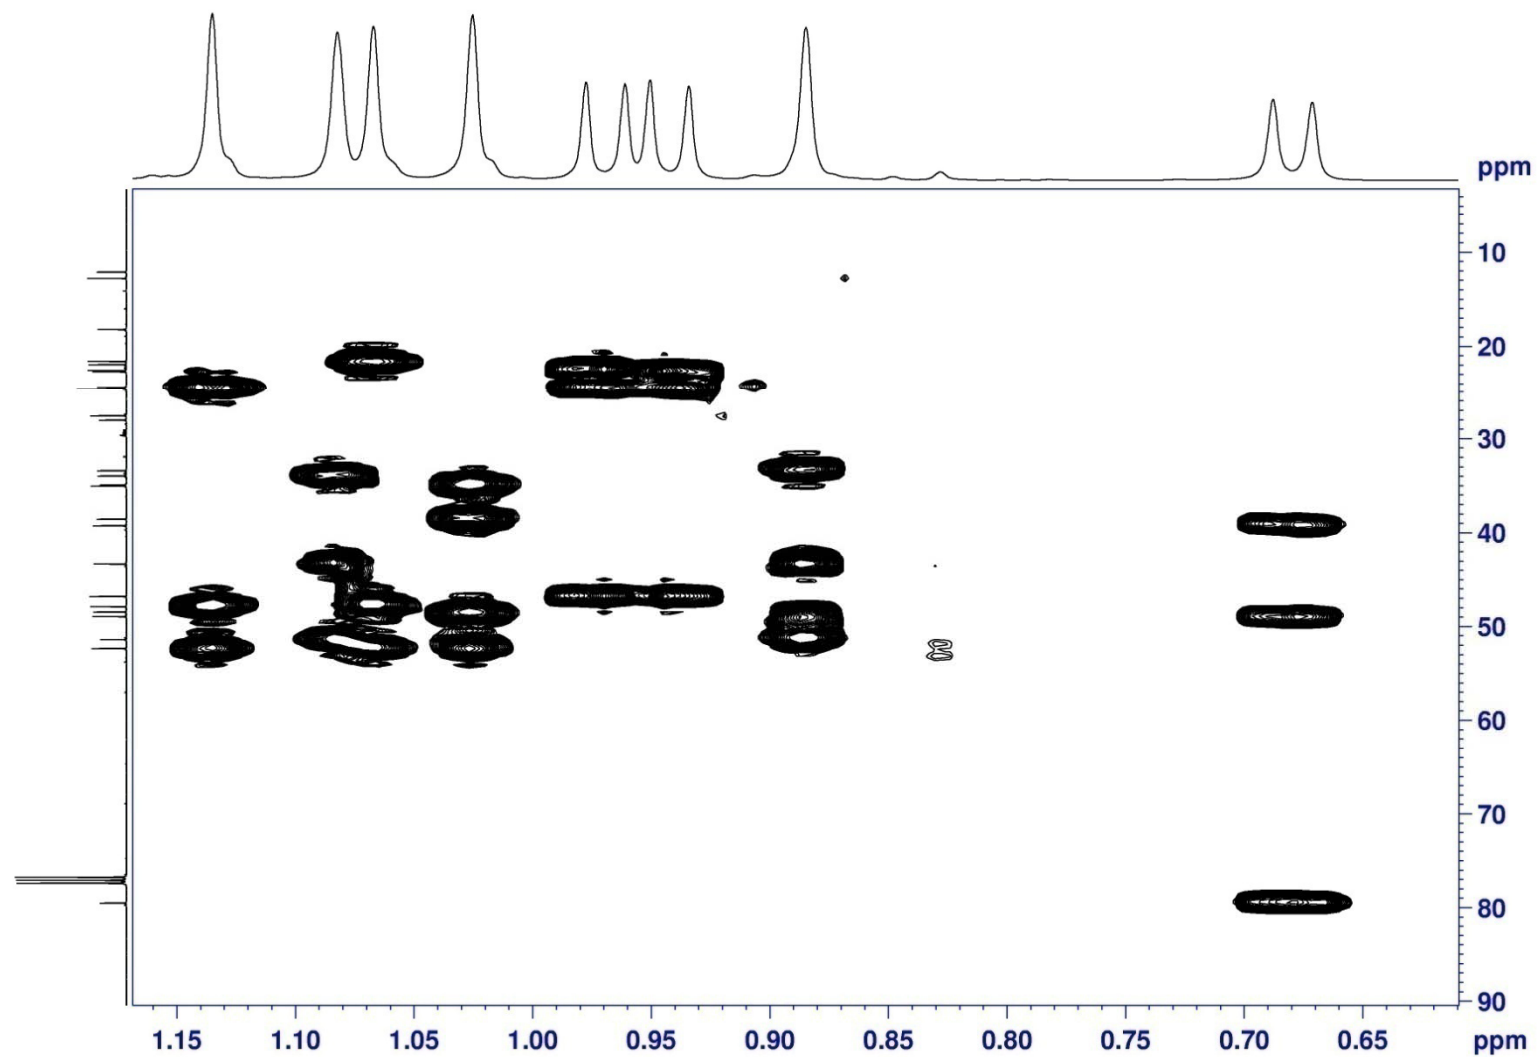

NOESY (400 MHz) spectrum of compound **2** in CDCl<sub>3</sub>

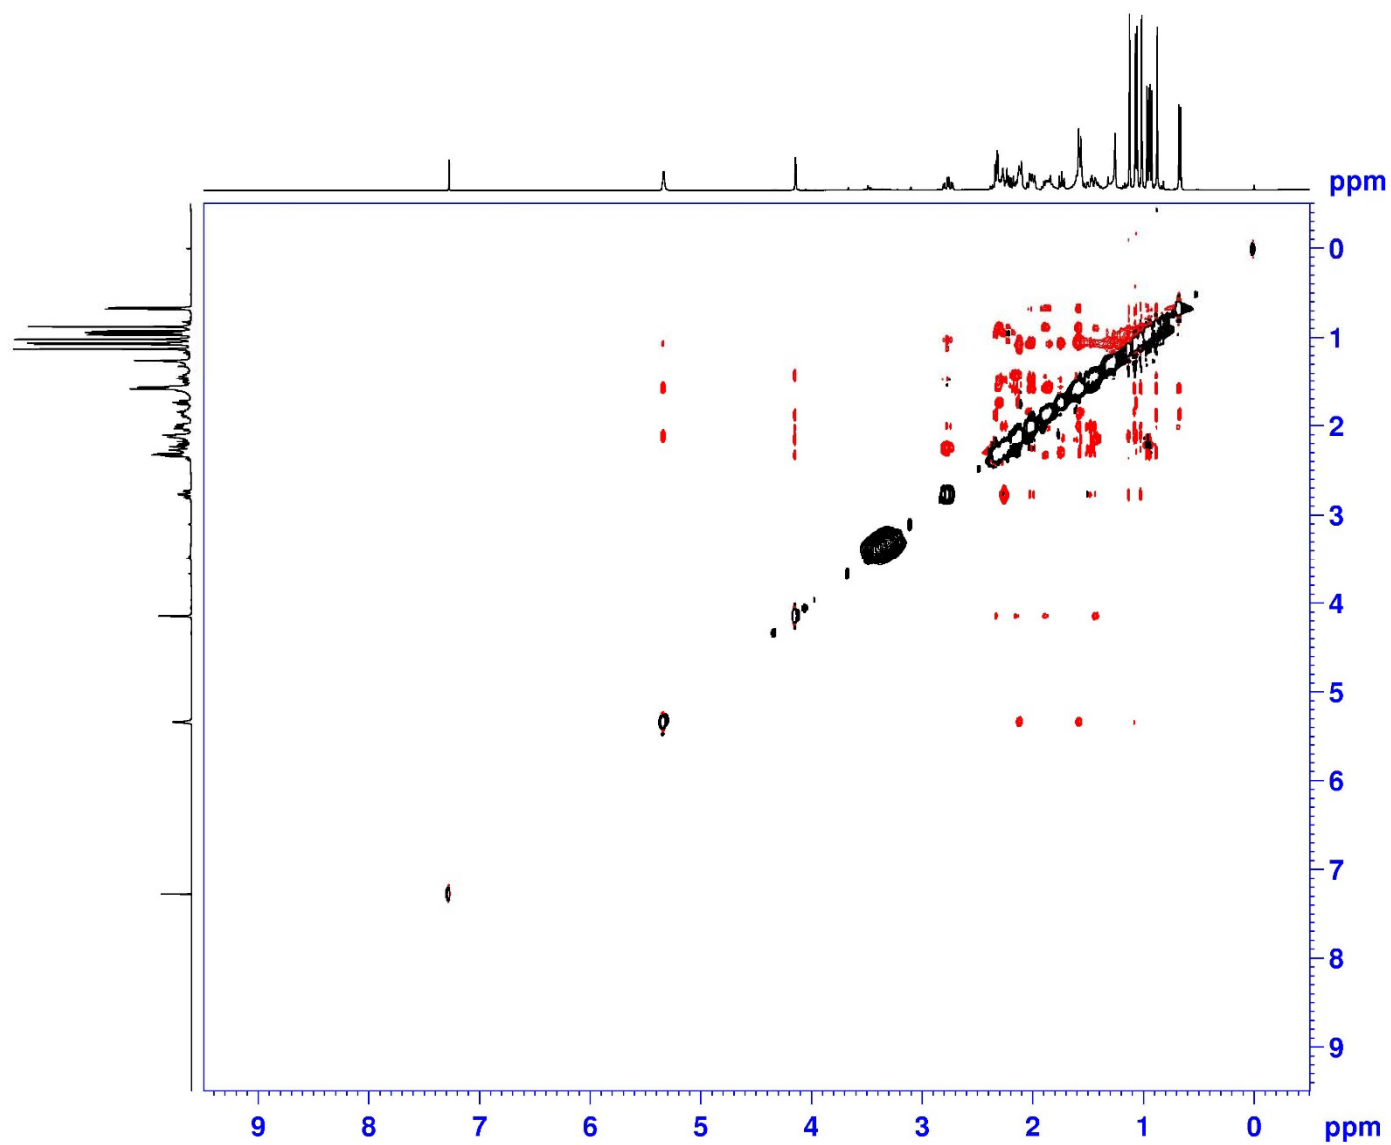

NOESY (400 MHz) spectrum of compound **2** in  $\text{CDCl}_3$

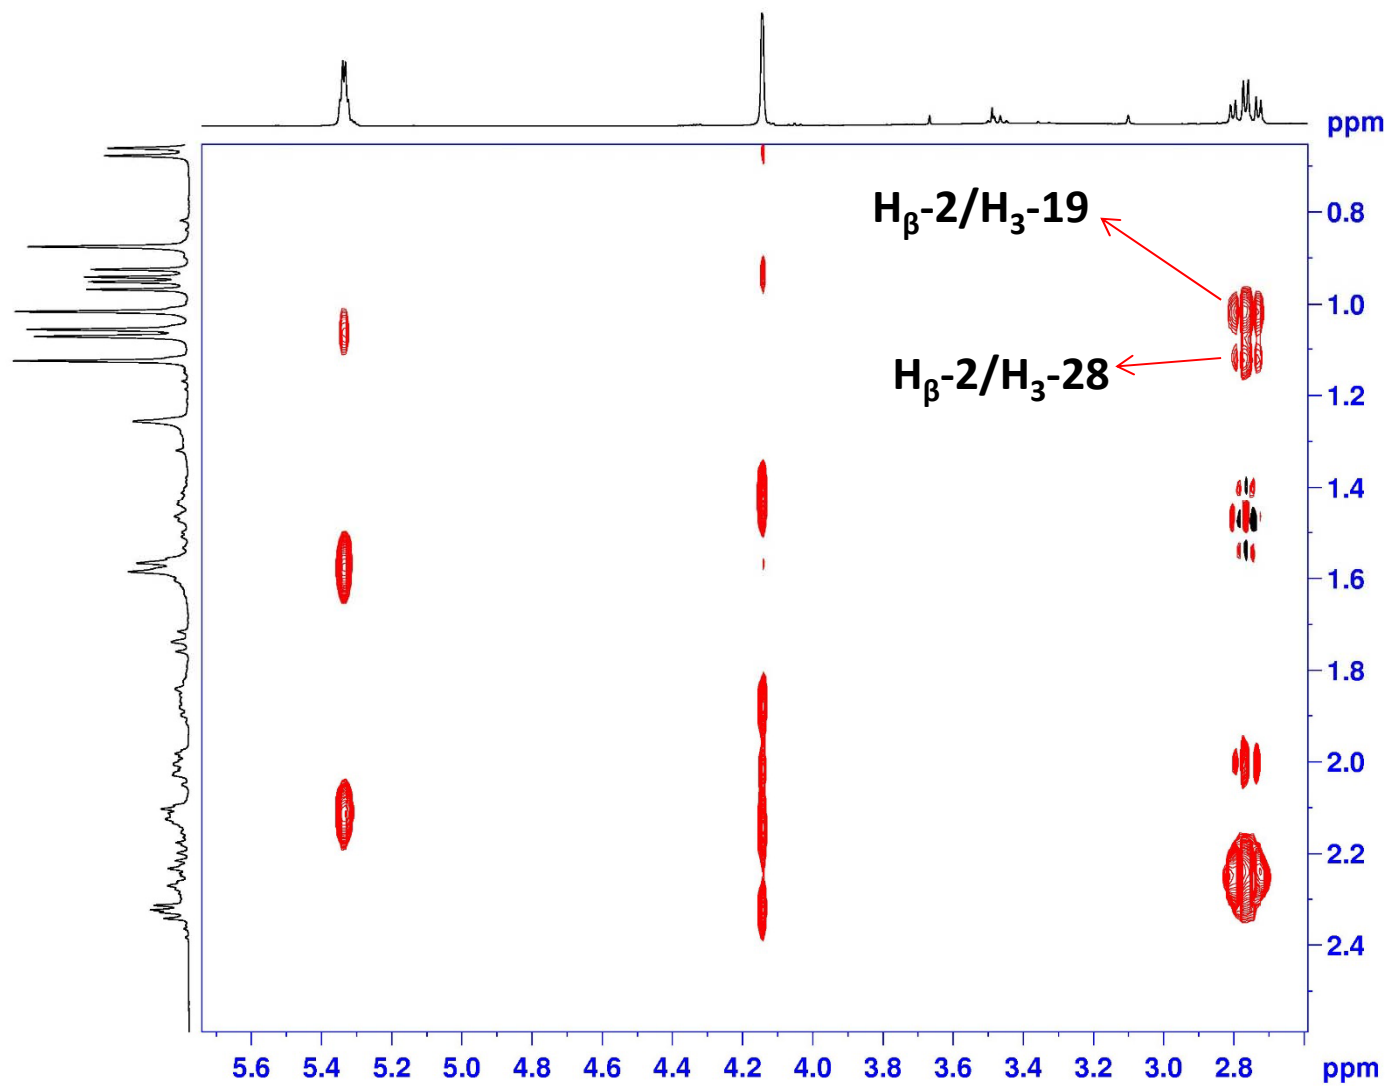

NOESY (400 MHz) spectrum of compound **2** in  $\text{CDCl}_3$

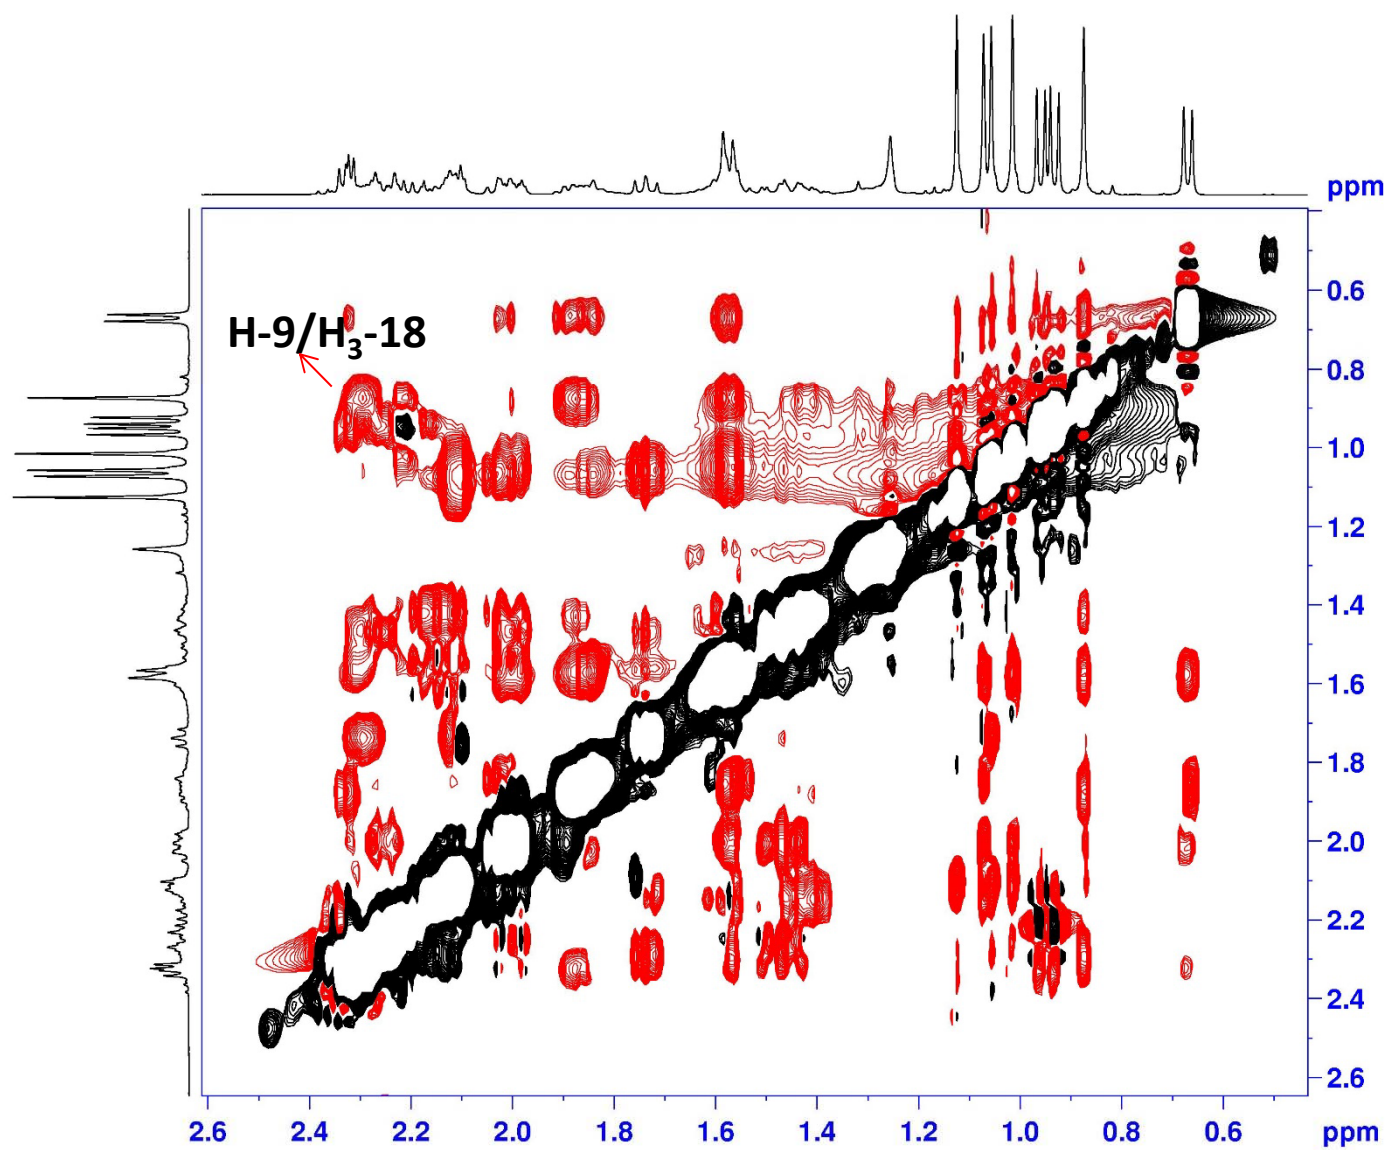

NOESY (400 MHz) spectrum of compound **2** in  $\text{CDCl}_3$

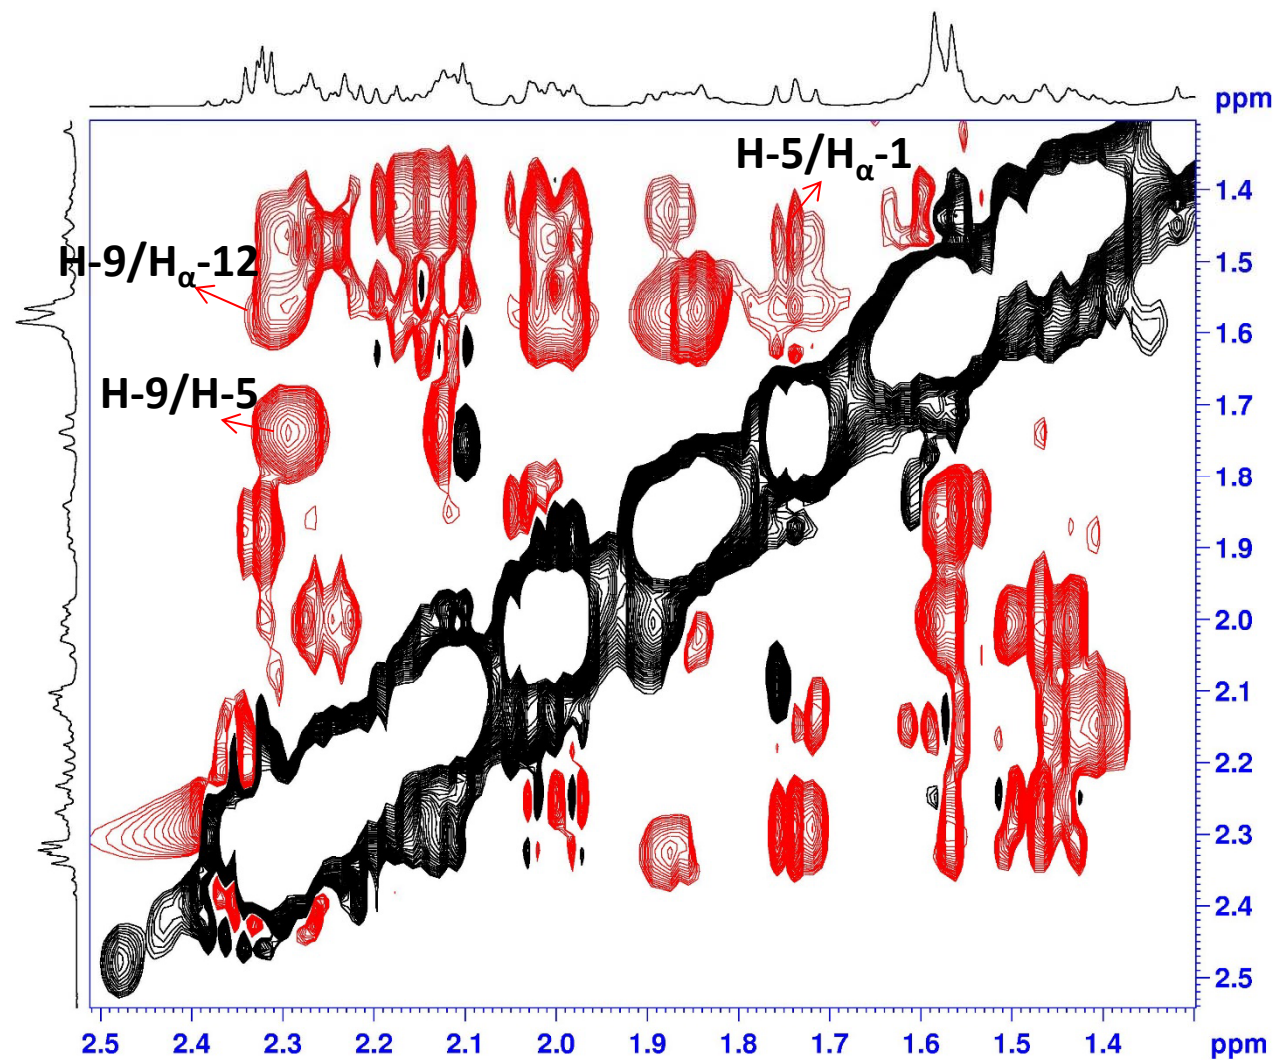



NOESY (400 MHz) spectrum of compound **2** in  $\text{CDCl}_3$

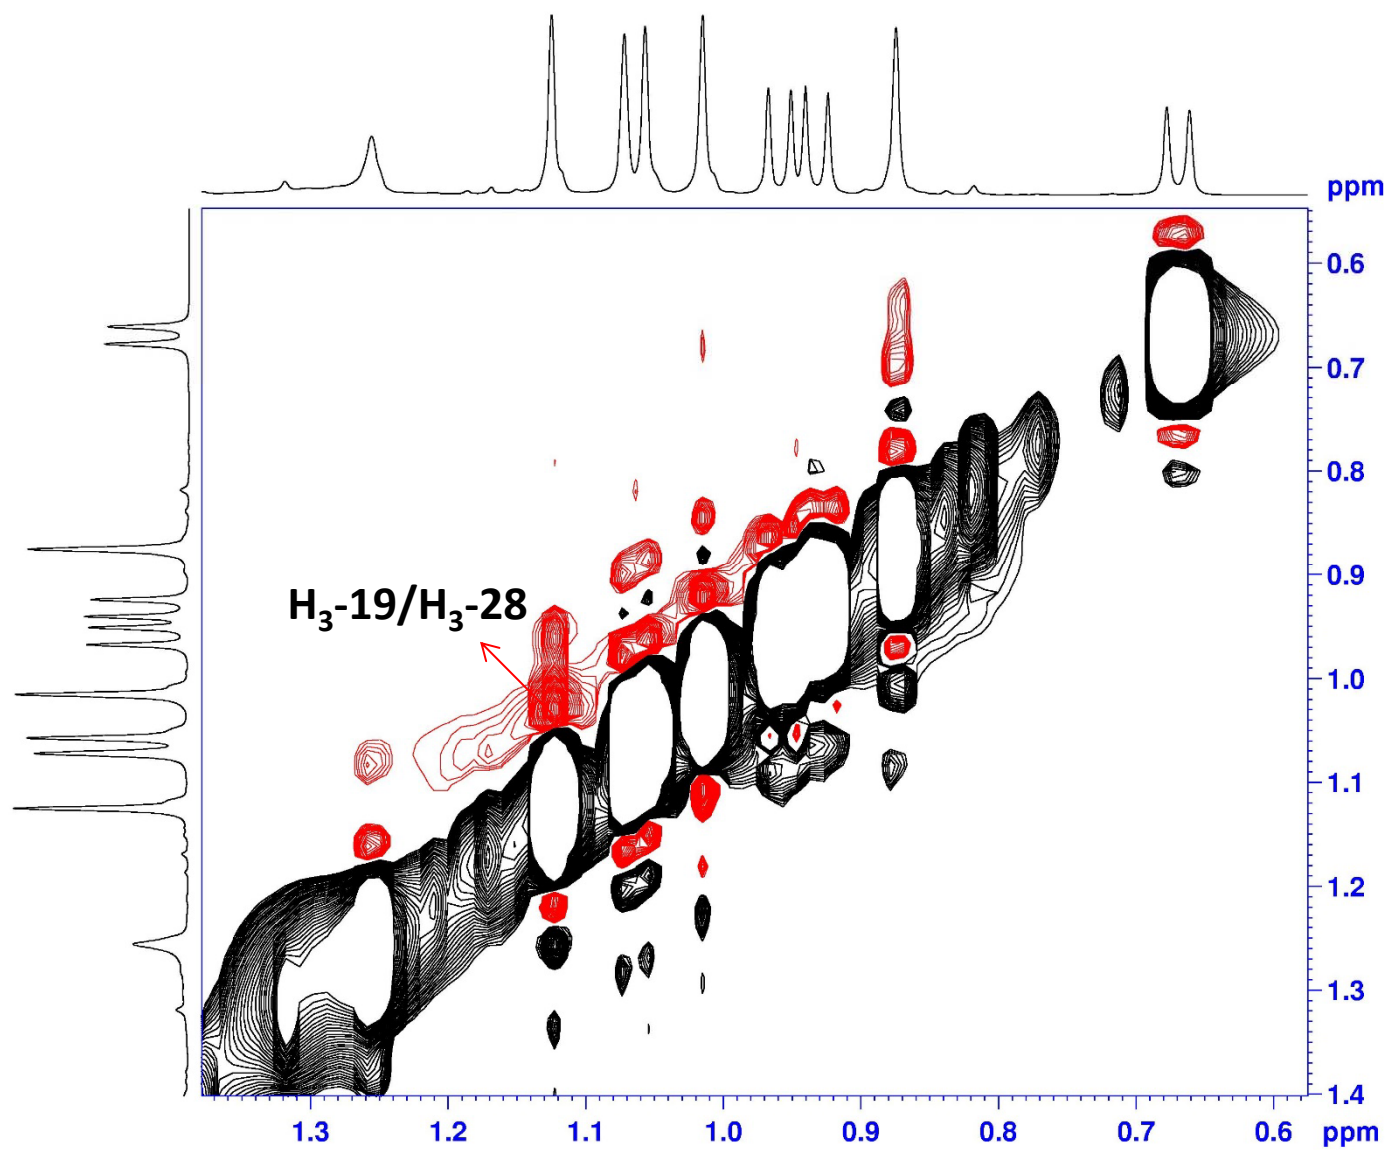

NOESY (400 MHz) spectrum of compound **2** in  $\text{CDCl}_3$

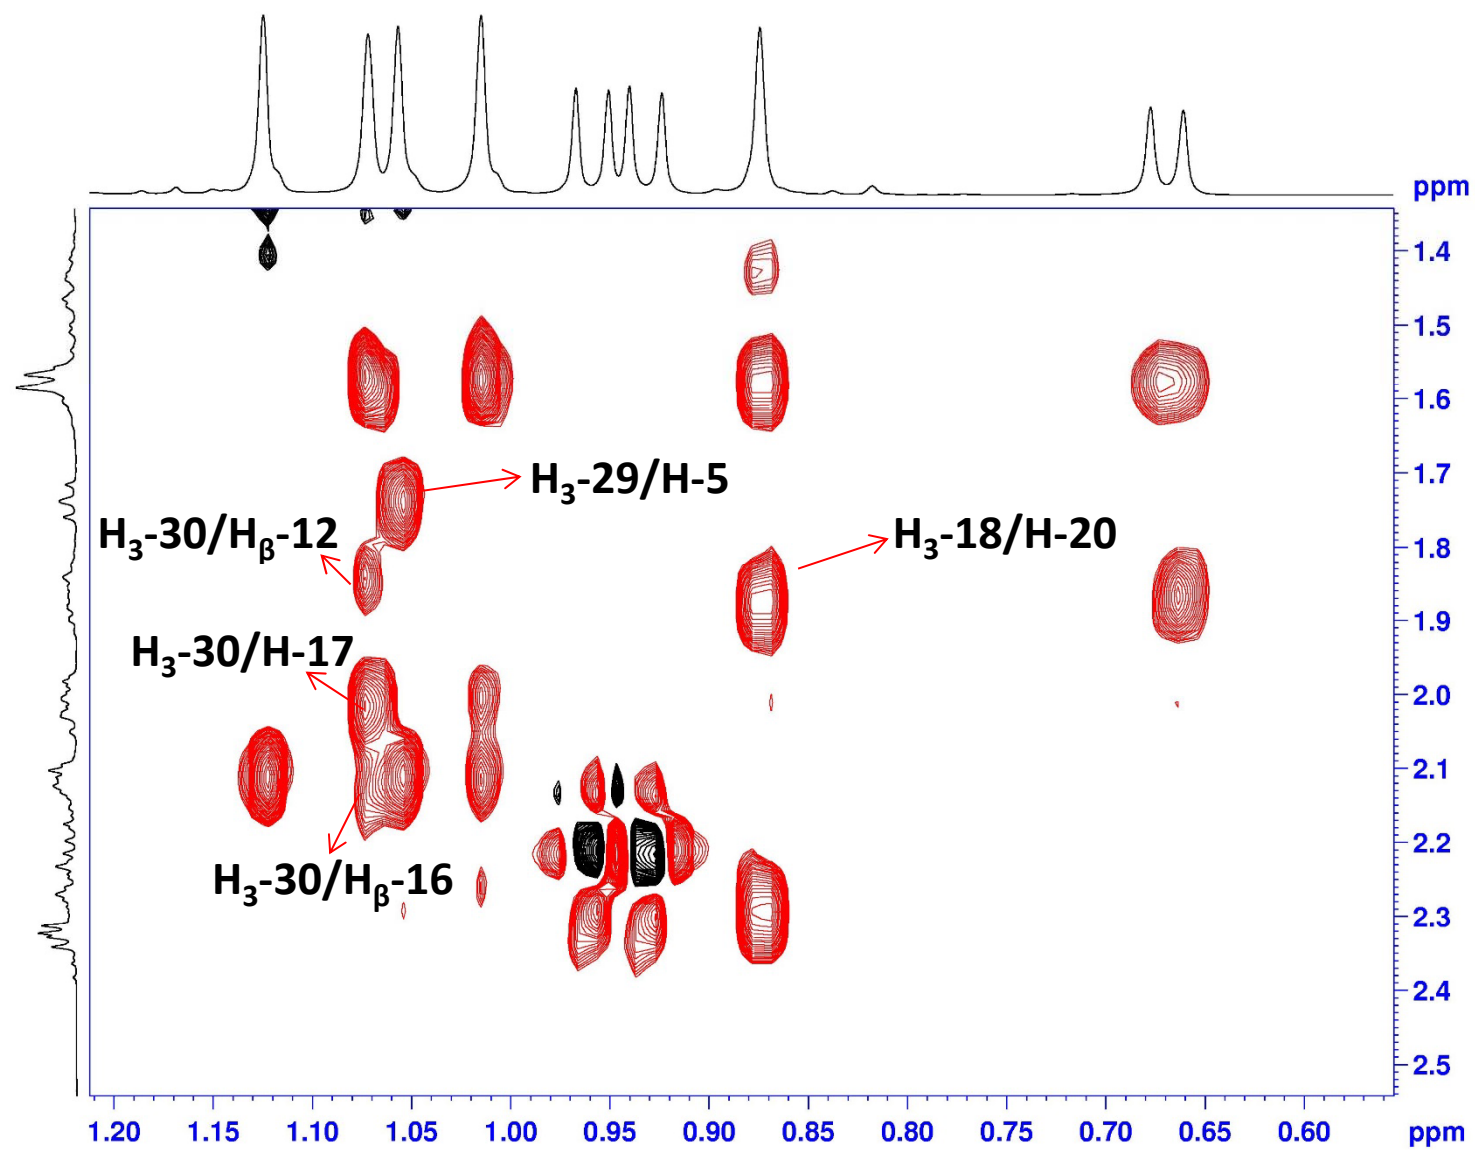



## HR-ESIMS for compound 3

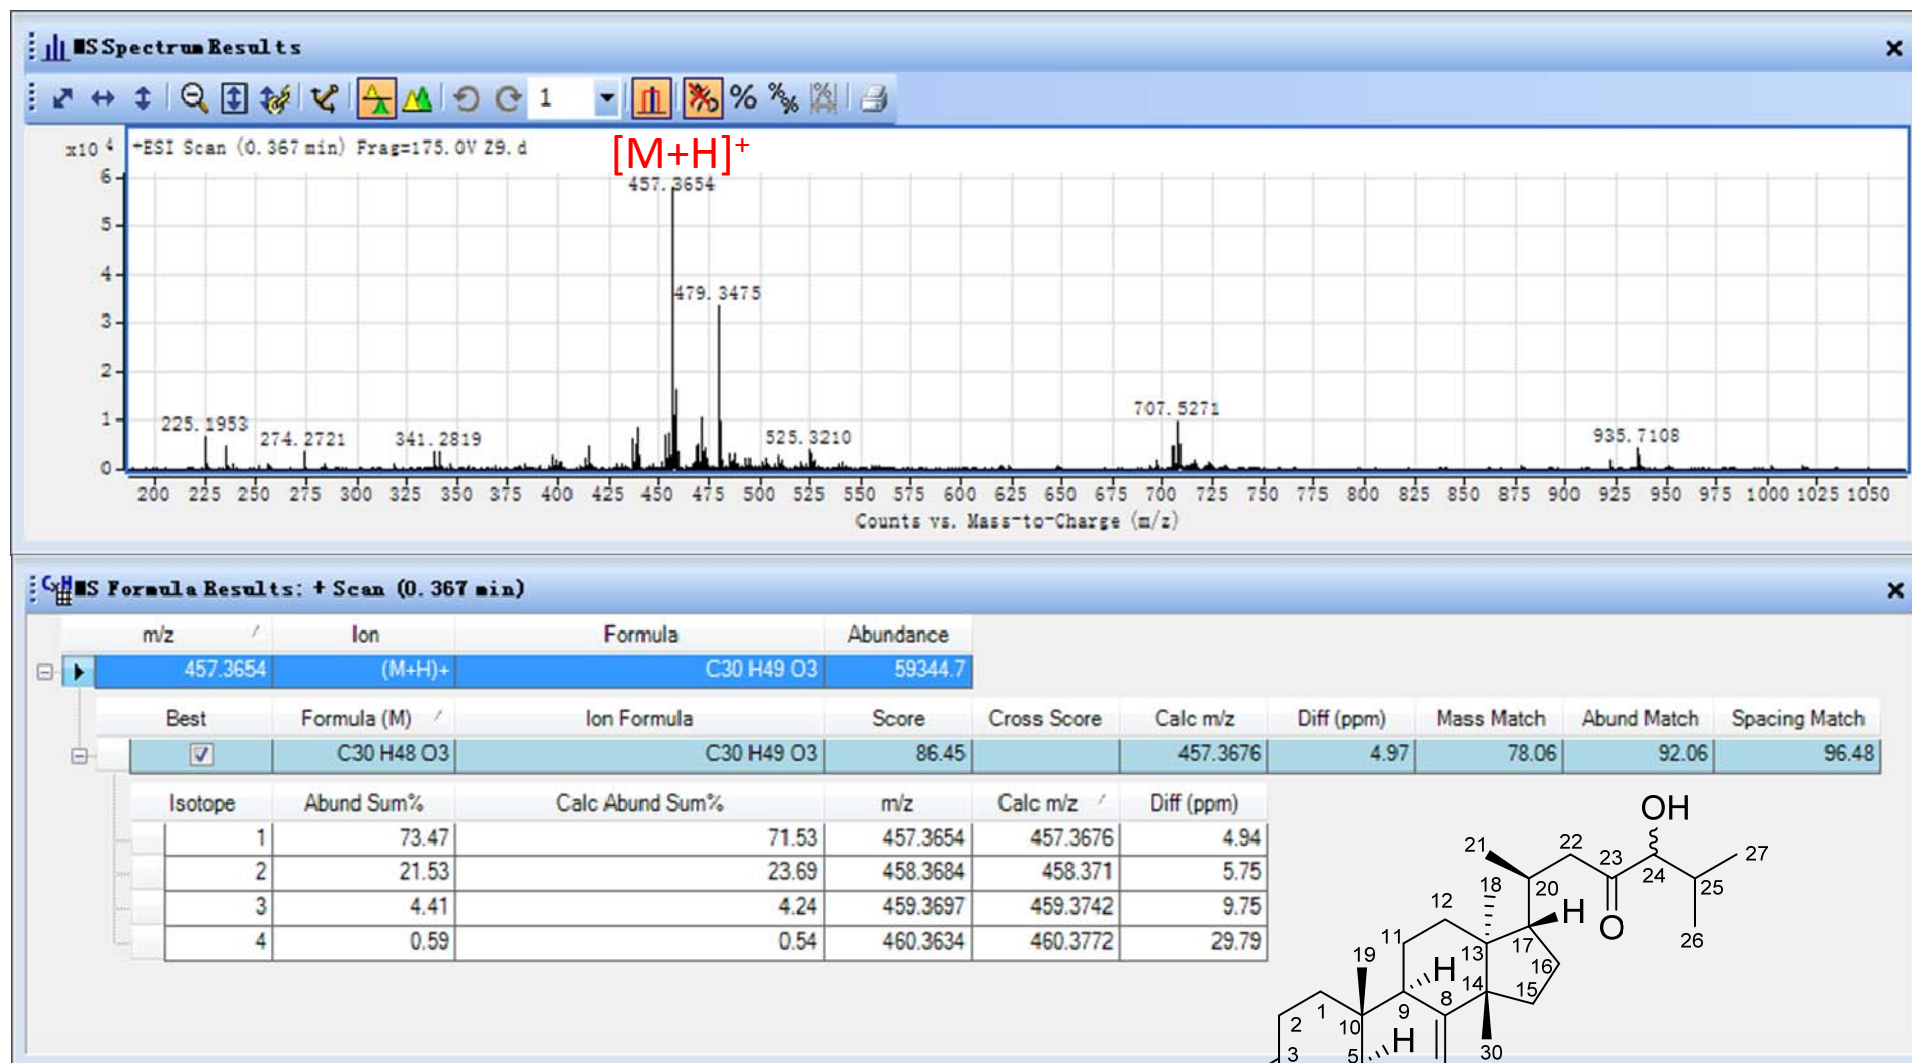

$^1\text{H}$  NMR (400 MHz) spectrum of compound **3** in  $\text{CDCl}_3$

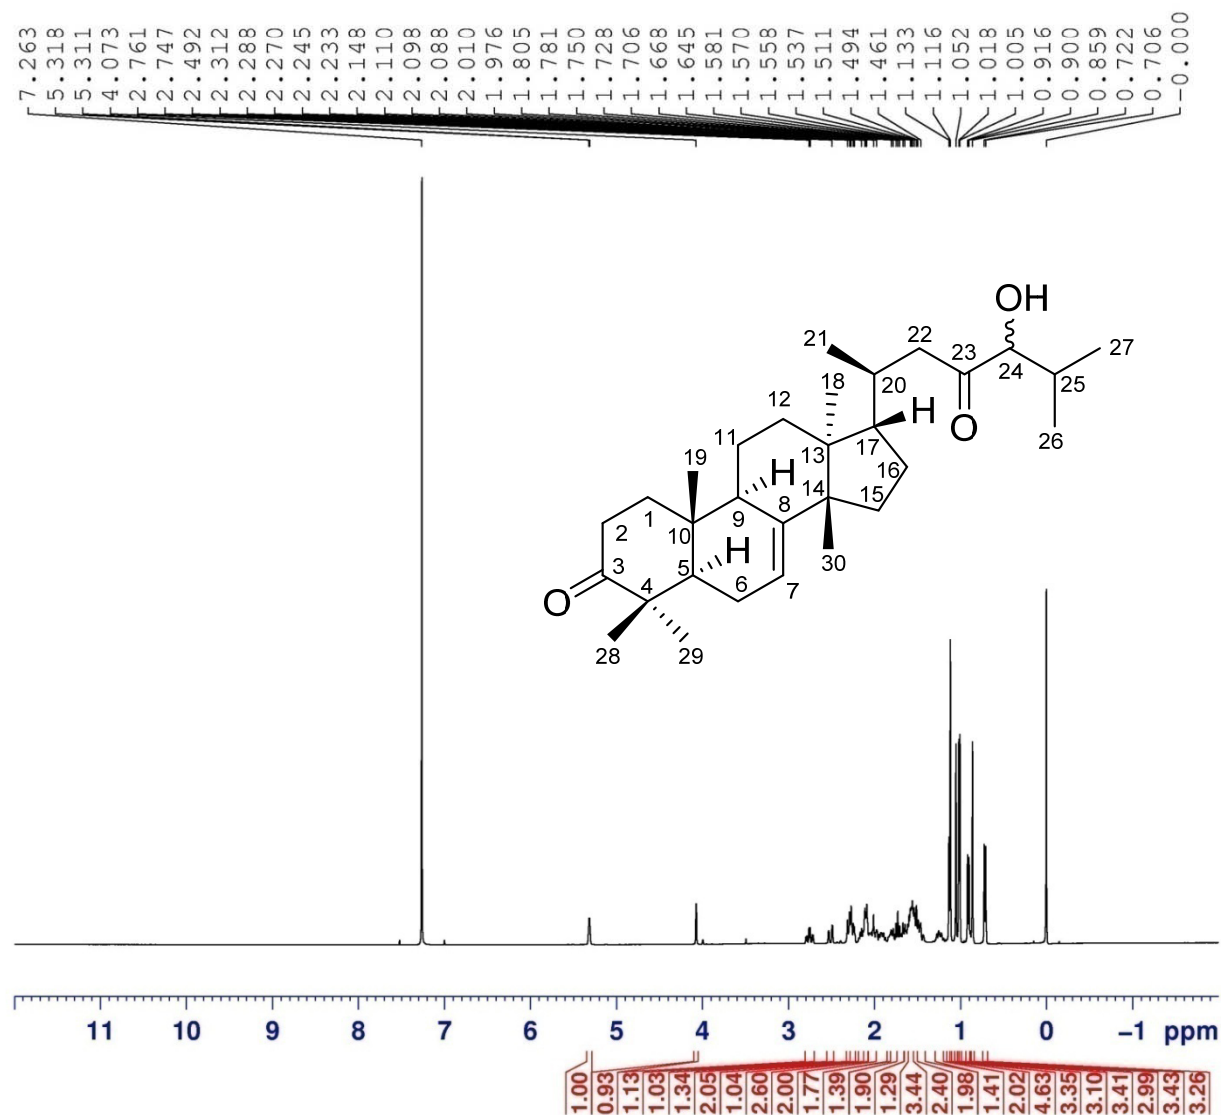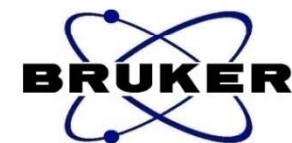

```

NAME          zq-9
EXPNO         1
PROCNO        1
Date_         20161202
Time          9.56
INSTRUM       spect
PROBHD        5 mm CPPBBO BB
PULPROG       zg30
TD            65536
SOLVENT       CDCl3
NS            32
DS            2
SWH           8223.685 Hz
FIDRES        0.125483 Hz
AQ            3.9846387 sec
RG            208.5
DW            60.800 usec
DE            10.00 usec
TE            297.0 K
D1            1.00000000 sec
TD0           1
  
```

```

===== CHANNEL f1 =====
SFO1          400.1324710 MHz
NUC1          1H
P1            11.50 usec
SI            65536
SF            400.1300083 MHz
WDW           EM
SSB           0
LB            0.30 Hz
GB            0
PC            1.00
  
```

$^1\text{H}$  NMR (400 MHz) spectrum of compound **3** in  $\text{CDCl}_3$

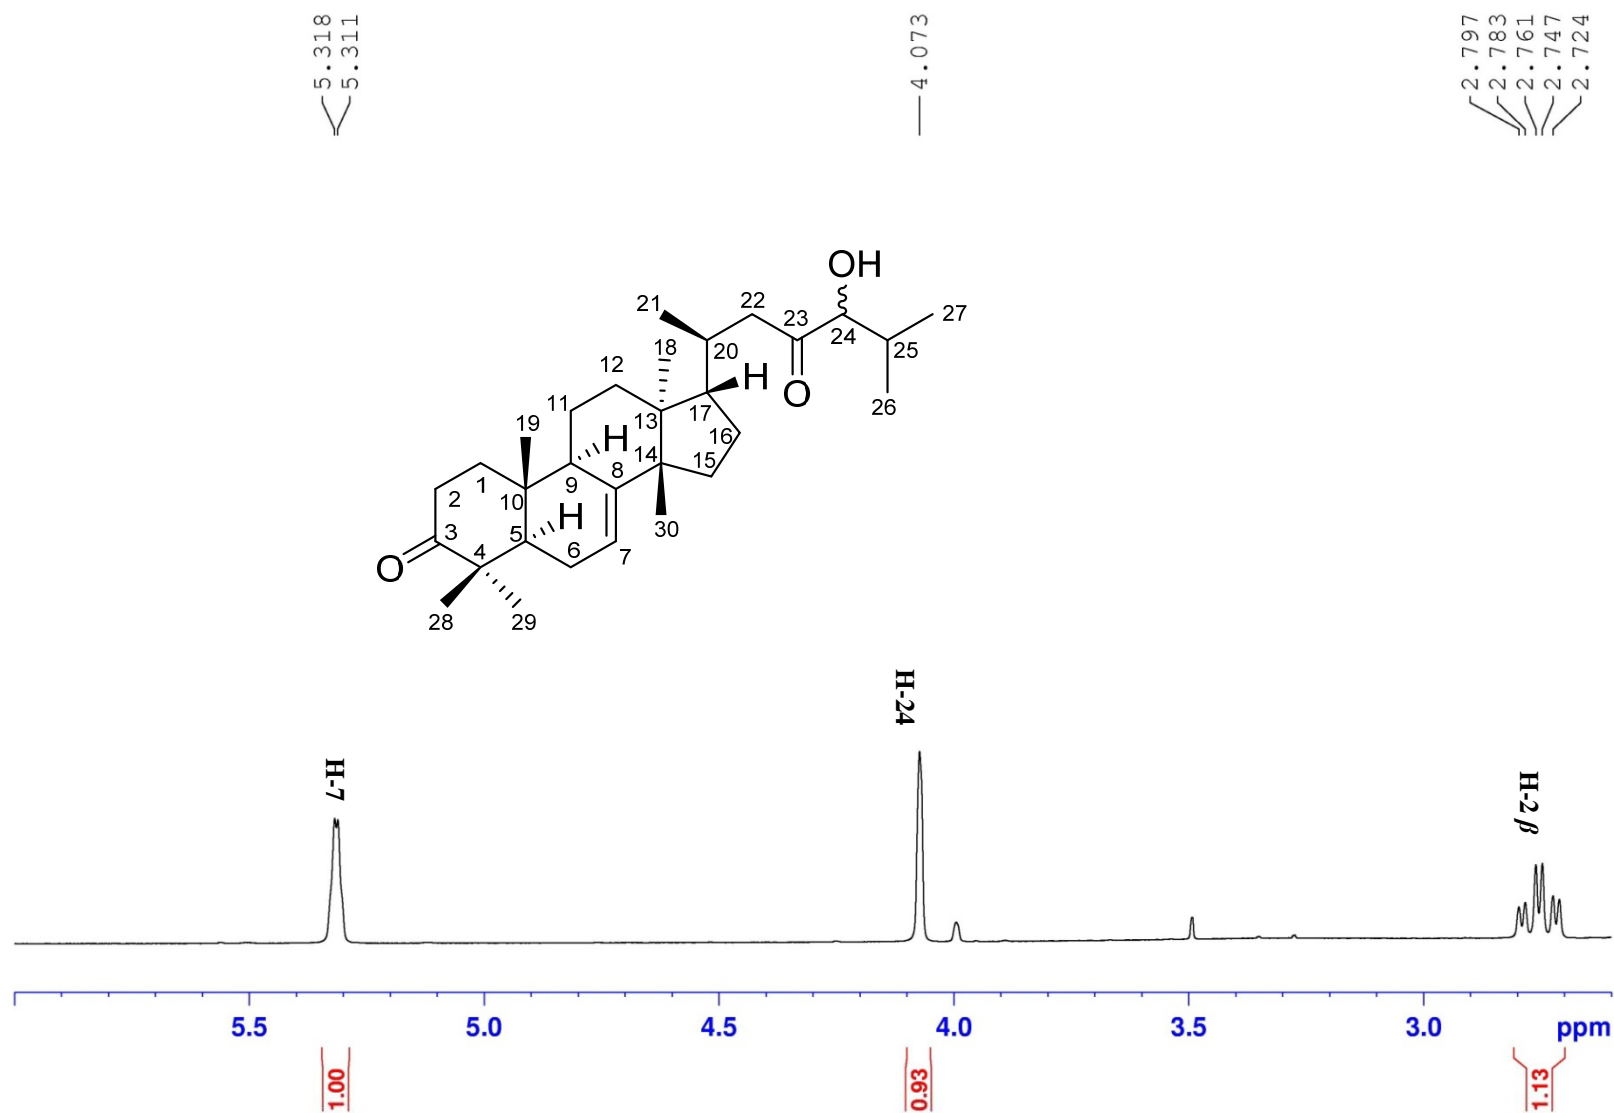

$^1\text{H}$  NMR (400 MHz) spectrum of compound **3** in  $\text{CDCl}_3$

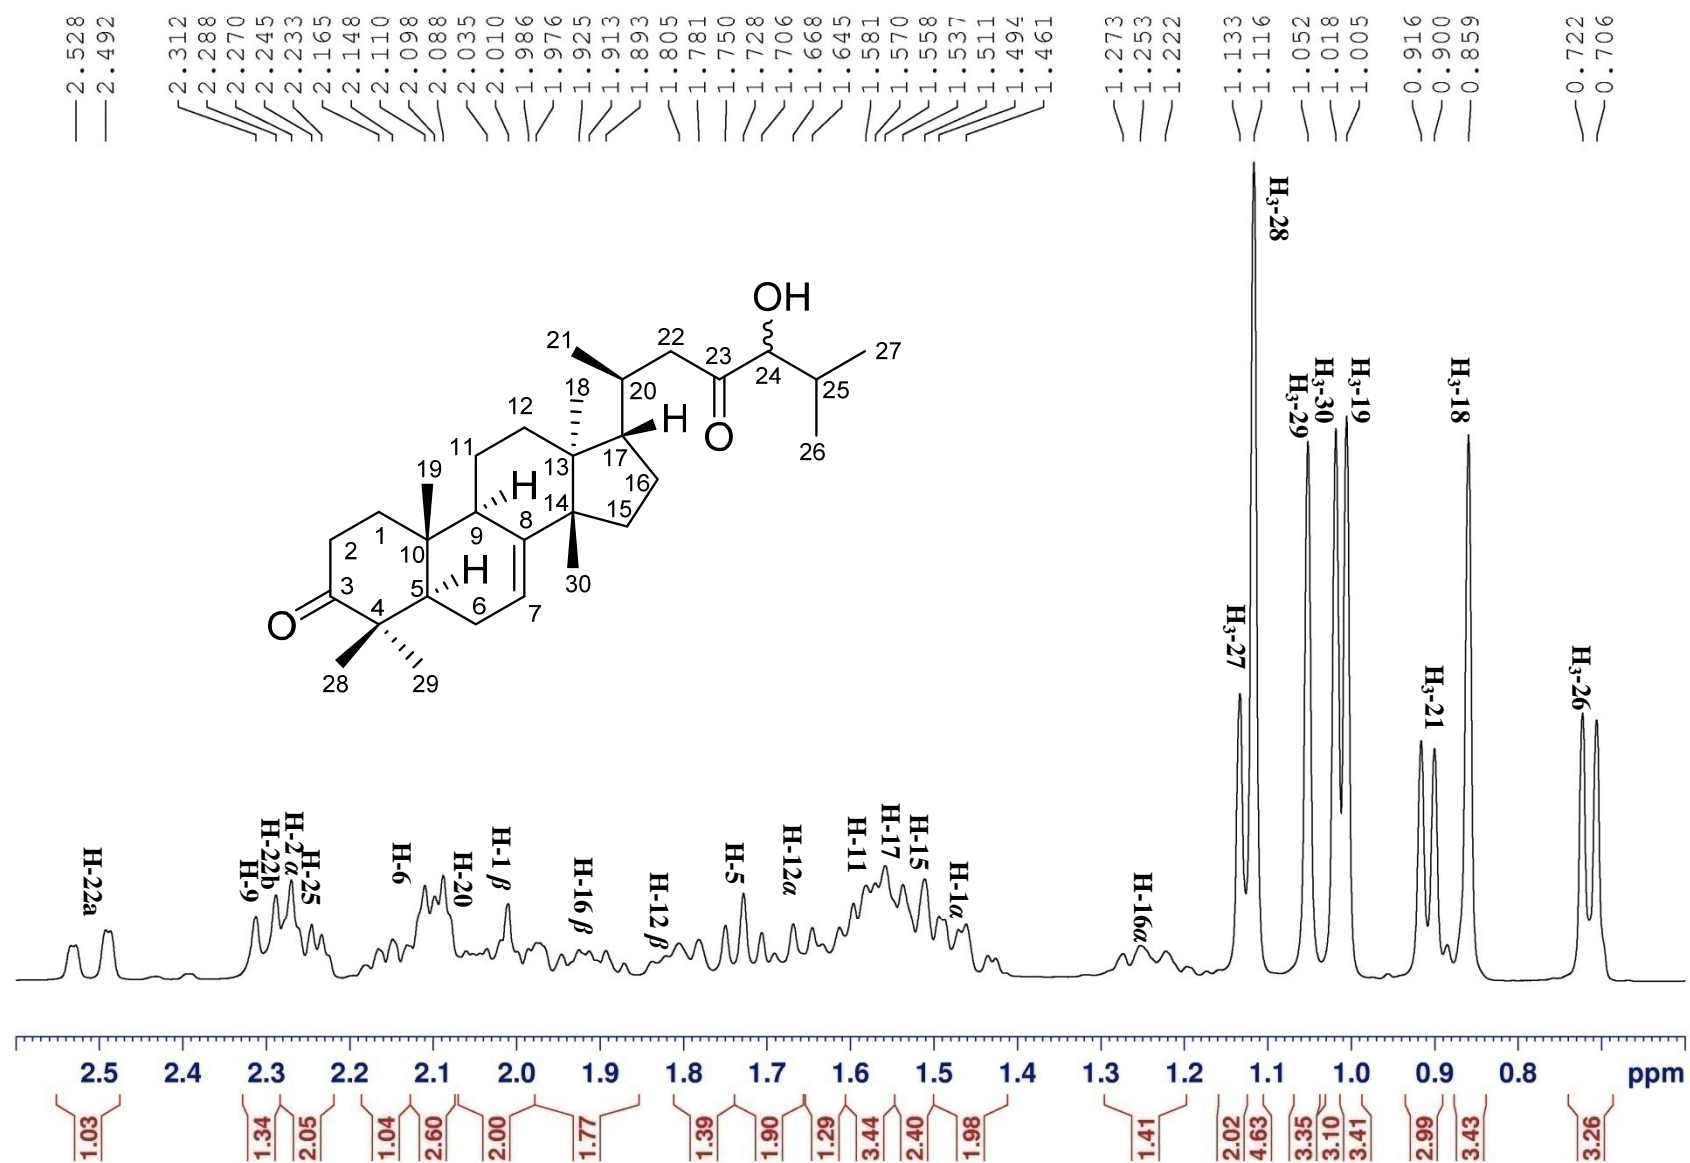

$^{13}\text{C}$  NMR (100 MHz) spectrum of compound **3** in  $\text{CDCl}_3$

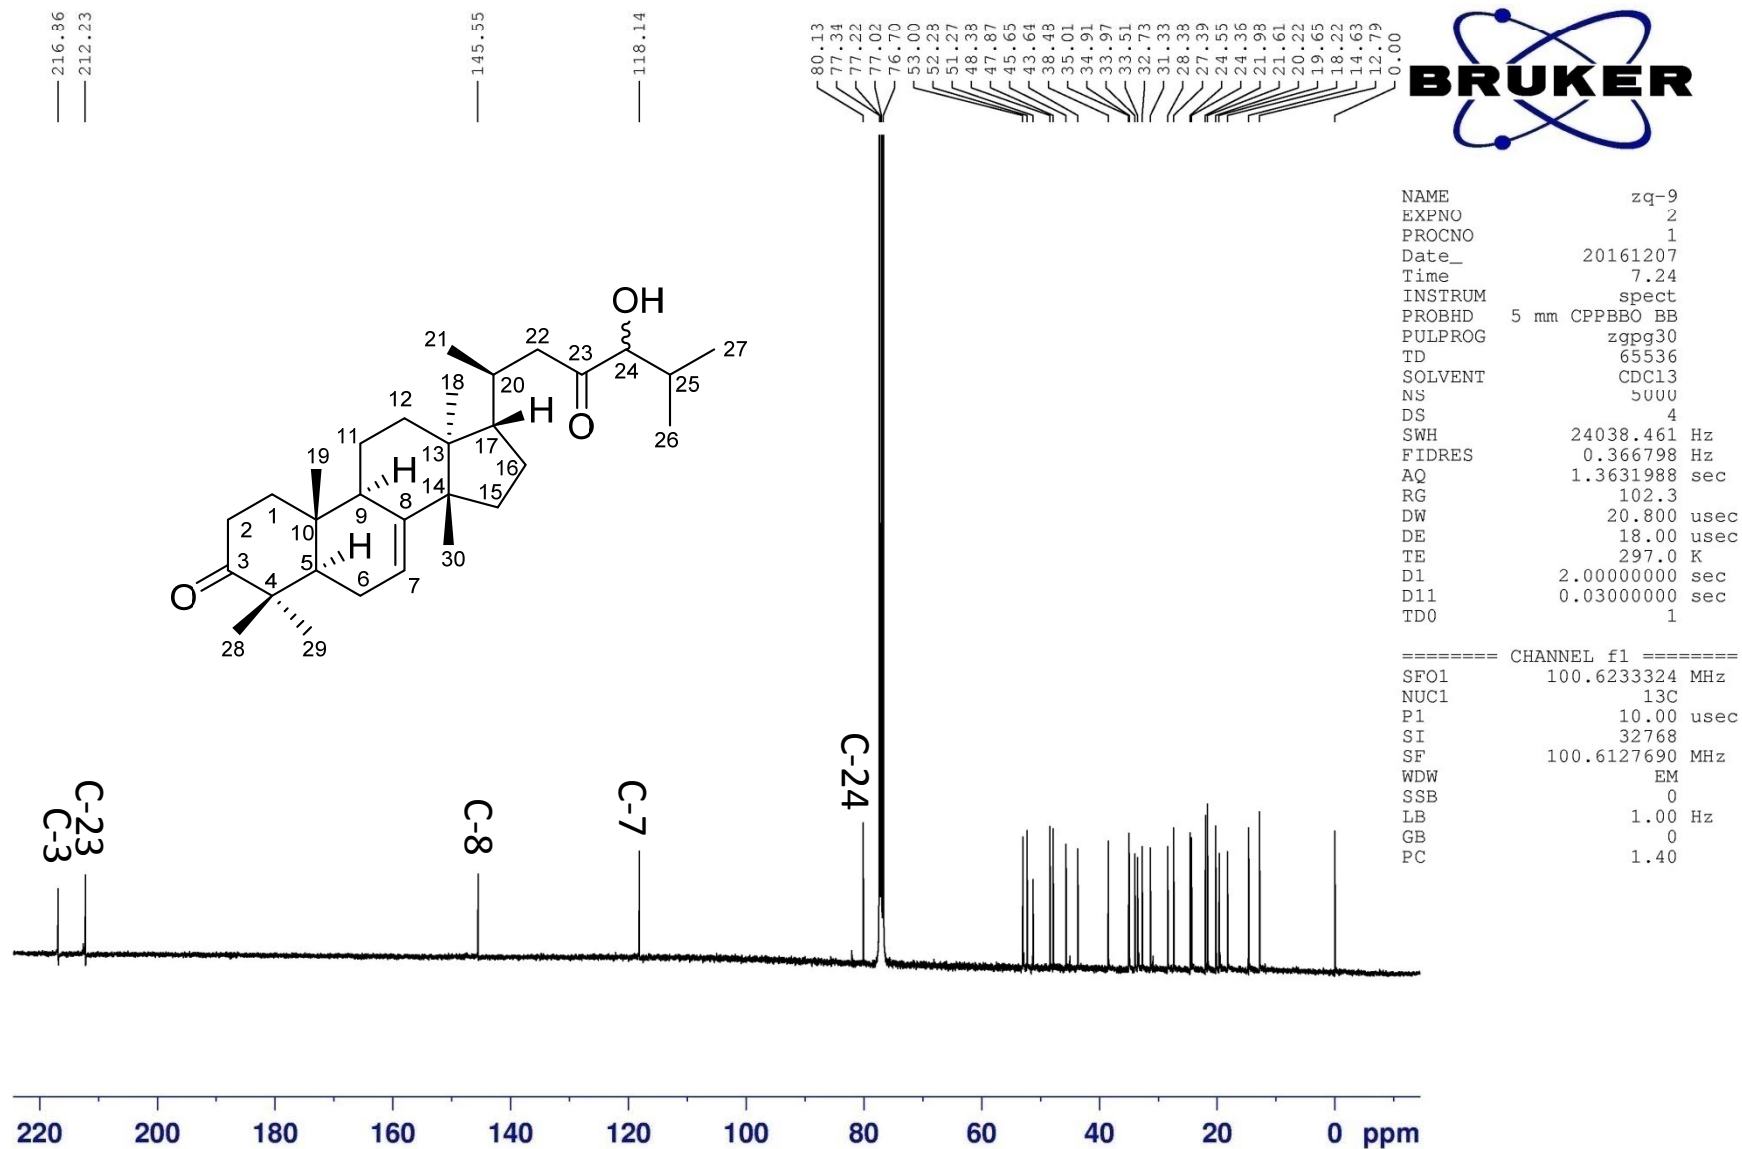

$^{13}\text{C}$  NMR (100 MHz) spectrum of compound **3** in  $\text{CDCl}_3$

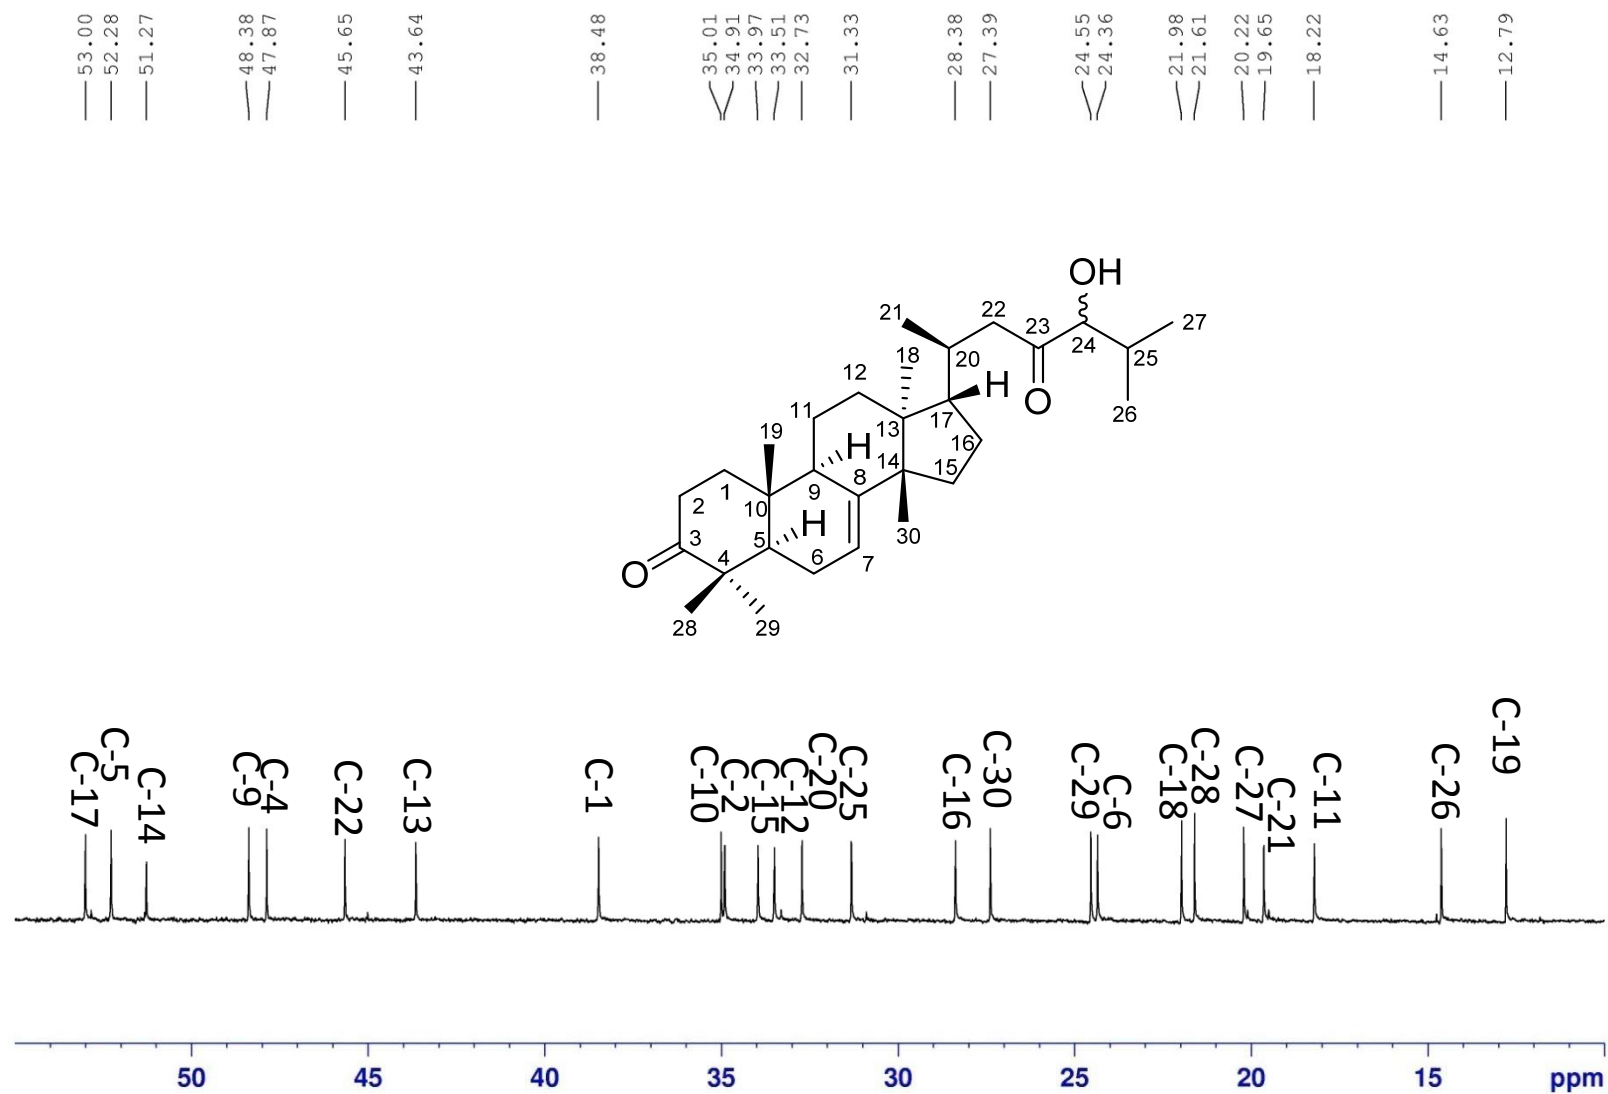

# DEPT135 (100 MHz) spectrum of compound **3** in CDCl<sub>3</sub>

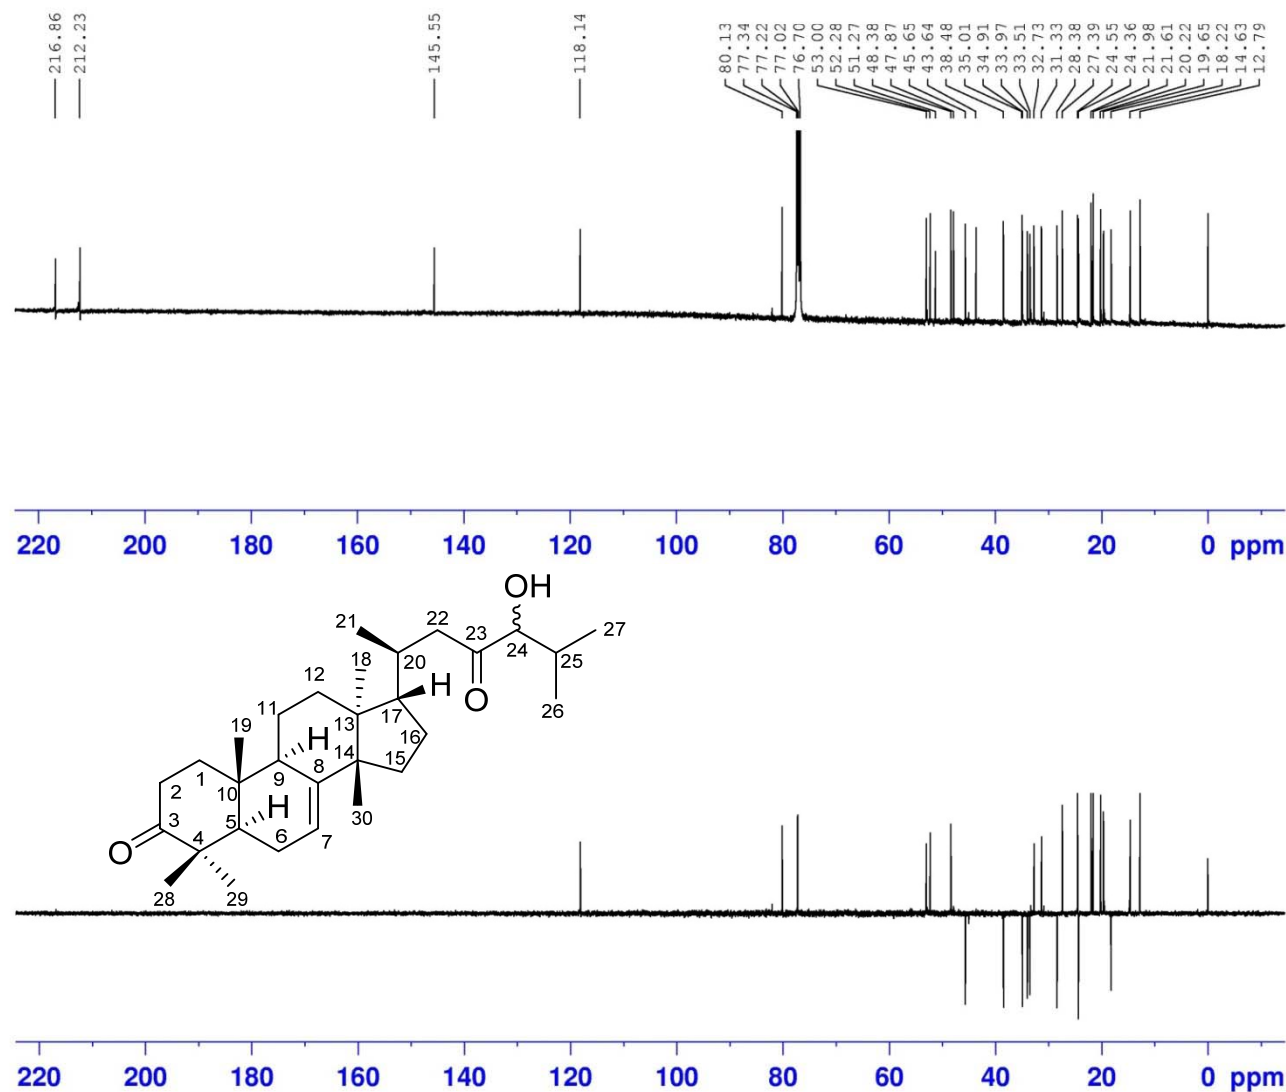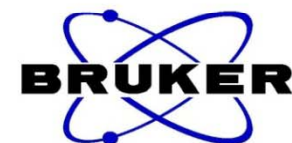

NAME zq-9  
 EXPNO 3  
 PROCNO 1  
 Date\_ 20161207  
 Time 8.51  
 INSTRUM spect  
 PROBHD 5 mm CPPBBO BB  
 PULPROG deptsp135  
 TD 65536  
 SOLVENT CDCl3  
 NS 1500  
 DS 4  
 SWH 24038.461 Hz  
 FIDRES 0.366798 Hz  
 AQ 1.3631988 sec  
 RG 91.64  
 DW 20.800 usec  
 DE 18.00 usec  
 TE 297.0 K  
 CNST2 145.0000000  
 D1 2.00000000 sec  
 D2 0.00344828 sec  
 D12 0.00002000 sec  
 TD0 1

===== CHANNEL f1 =====  
 SFO1 100.6233324 MHz  
 NUC1 13C  
 P1 10.00 usec  
 P13 2000.00 usec  
 SI 32768  
 SF 100.6127690 MHz  
 WDW EM  
 SSB 0  
 LB 1.00 Hz  
 GB 0  
 PC 1.40



# DEPT135 (100 MHz) spectrum of compound **3** in CDCl<sub>3</sub>

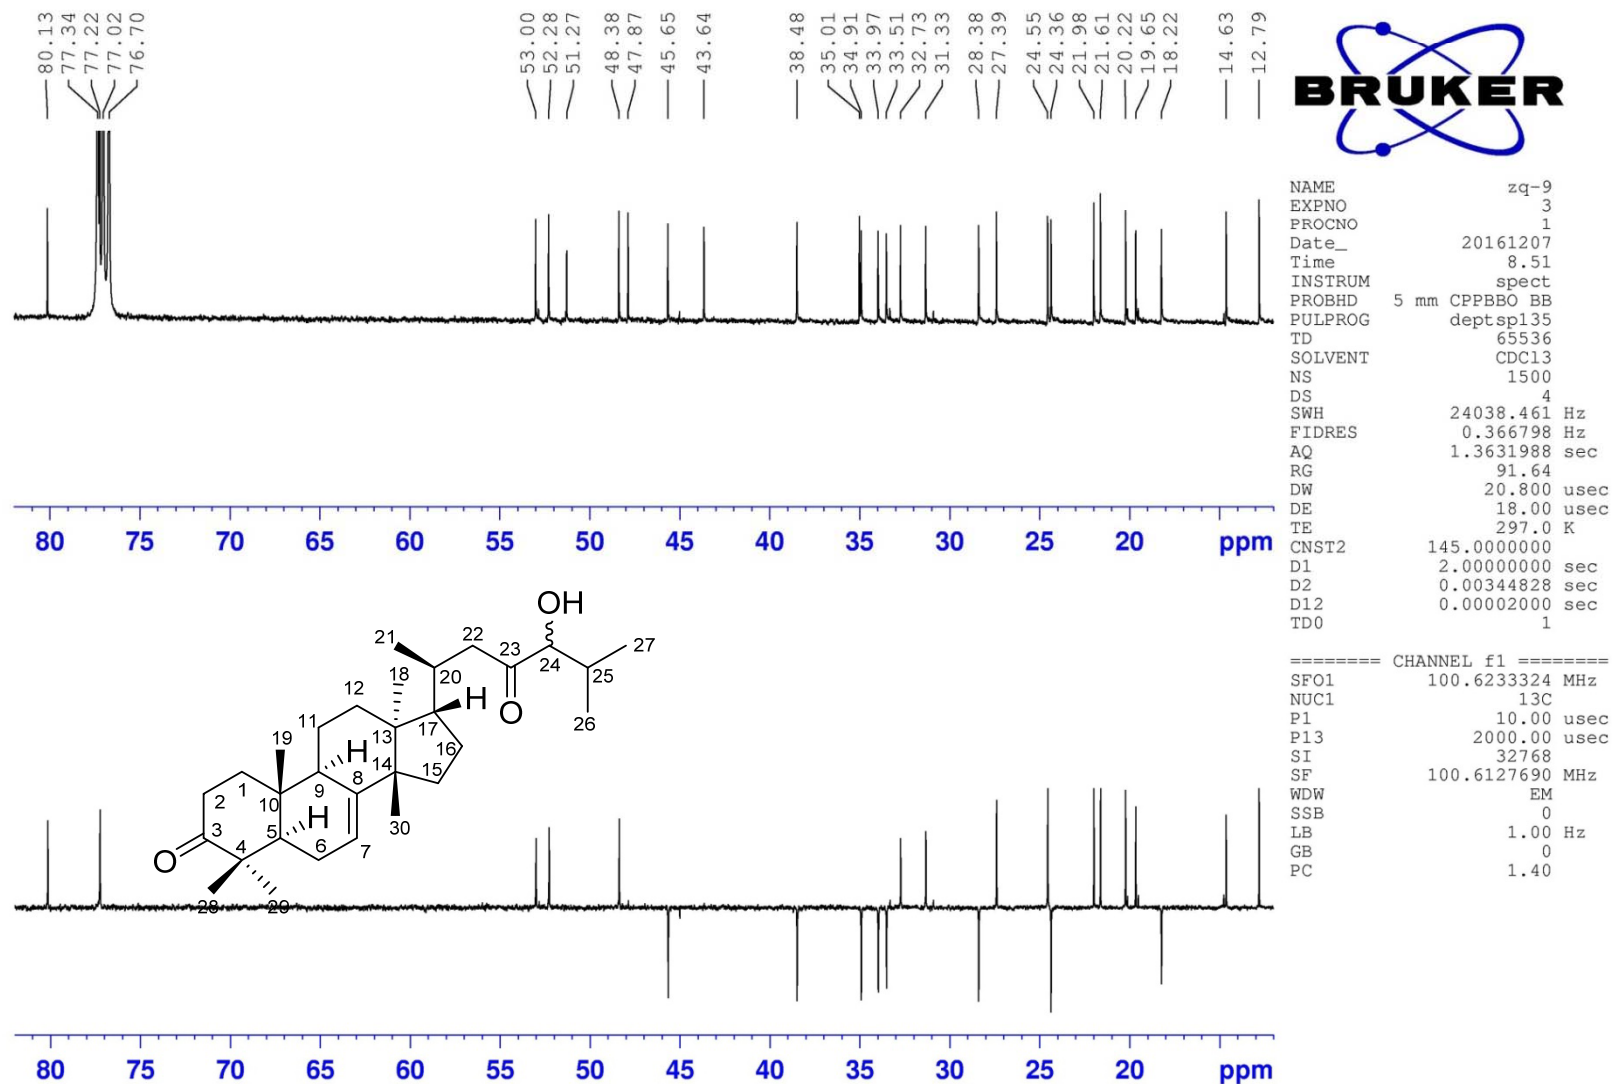



$^1\text{H}$ - $^1\text{H}$  COSY (400 MHz) spectrum of compound **3** in  $\text{CDCl}_3$

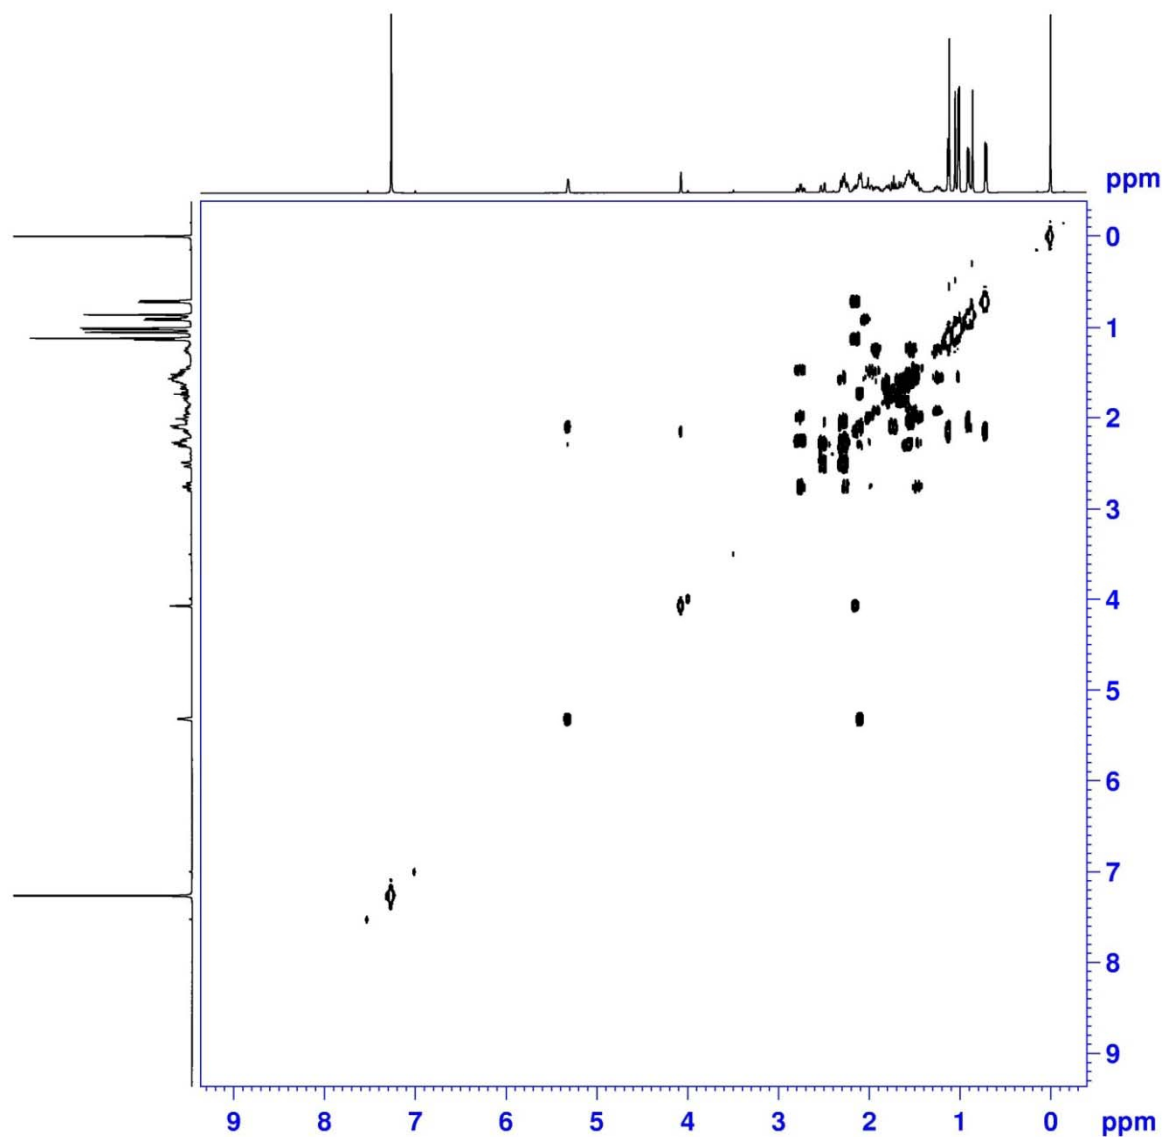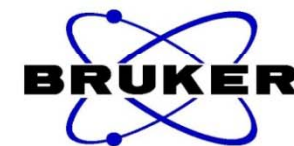

```

NAME           ZQ-9-1
EXPNO           4
PROCNO          1
Date_           20161208
Time            15.26
INSTRUM         spect
PROBHD          5 mm CPPBBO BB
PULPROG         cosygpppqf
TD              2048
SOLVENT         CDCl3
NS               32
DS               8
SWH             3906.250 Hz
FIDRES          1.907349 Hz
AQ              0.2621940 sec
RG              208.5
DW              128.000 usec
DE              10.00 usec
TE              297.0 K
D0              0.00000300 sec
D1              1.89678097 sec
D11             0.03000000 sec
D12             0.00002000 sec
D13             0.00000400 sec
D16             0.00020000 sec
IN0             0.00025600 sec
    
```

```

===== CHANNEL f1 =====
SFO1          400.1318006 MHz
NUC1           1H
P0             11.50 usec
P1             11.50 usec
P17            2500.00 usec
ND0             1
TD             128
SFO1          400.1318 MHz
FIDRES         30.517578 Hz
SW              9.762 ppm
FnmODE         QF
SI             1024
SF             400.1300064 MHz
WDW            QSINE
SSB             0
LB              0.00 Hz
GB              0
PC              1.40
SI             1024
MC2            QF
SF             400.1300061 MHz
WDW            QSINE
SSB             0
LB              0.00 Hz
    
```

$^1\text{H}$ - $^1\text{H}$  COSY (400 MHz) spectrum of compound **3** in  $\text{CDCl}_3$

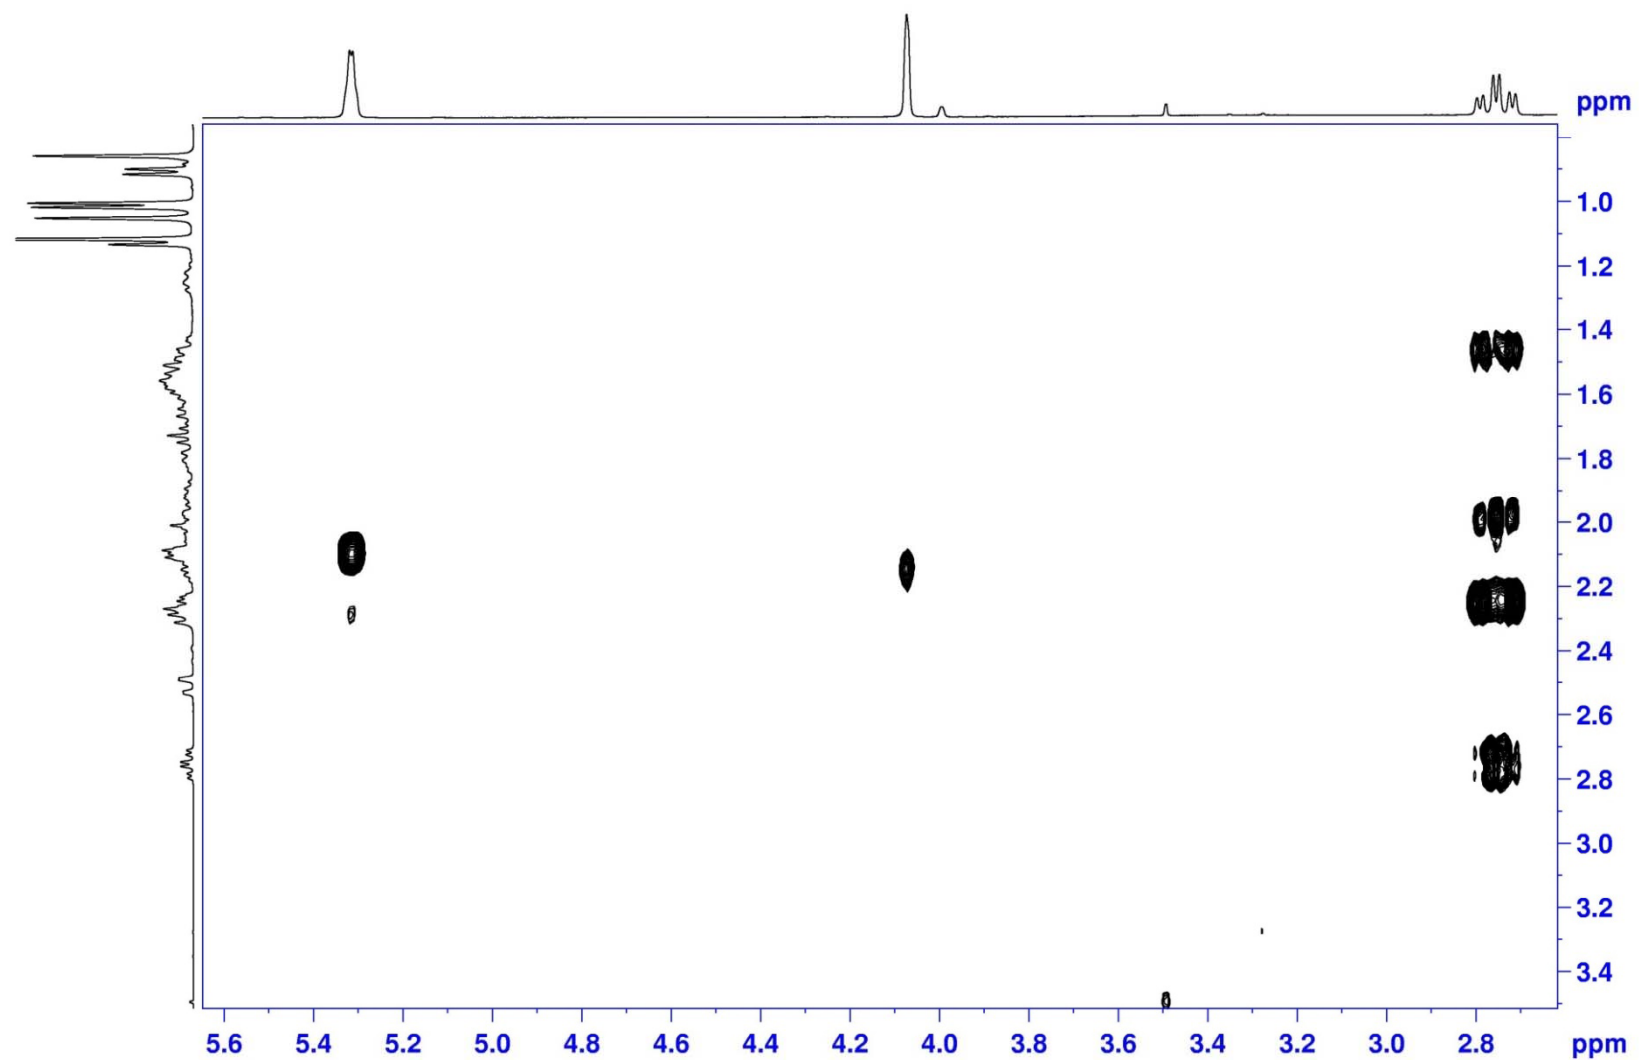

$^1\text{H}$ - $^1\text{H}$  COSY (400 MHz) spectrum of compound **3** in  $\text{CDCl}_3$

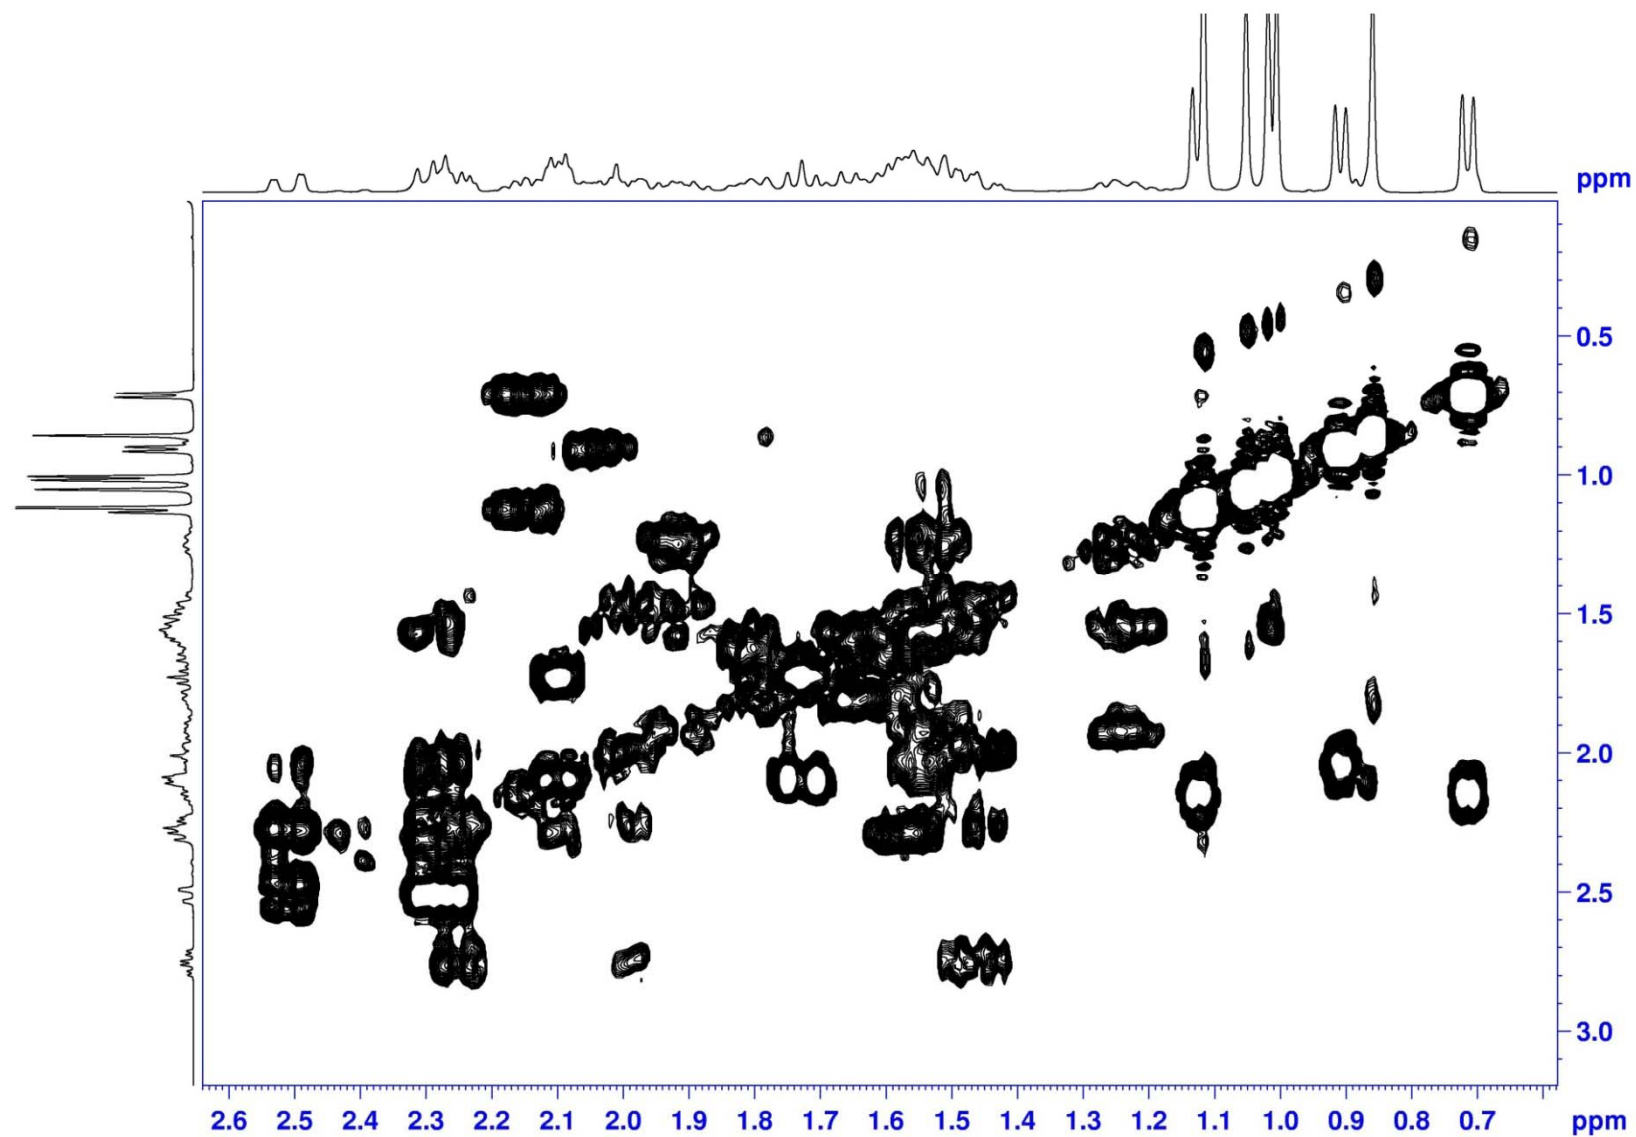

# HSQC (400 MHz) spectrum of compound **3** in CDCl<sub>3</sub>

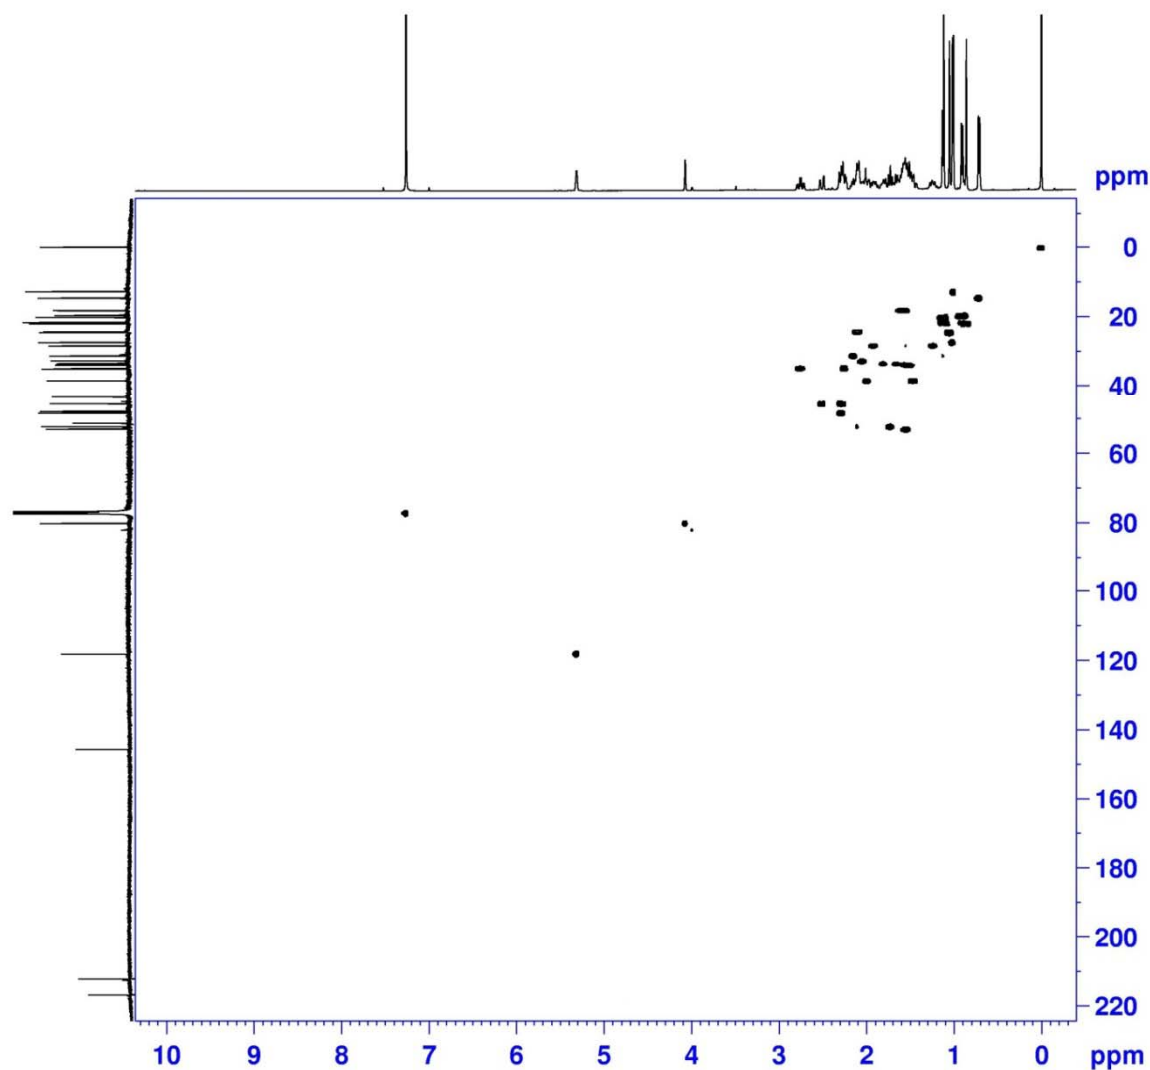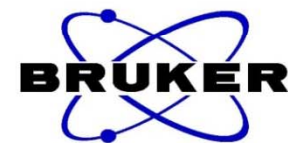

```

NAME          ZQ-9-1
EXPNO         105
PROCNO        1
Date_         20161208
Time          17.58
INSTRUM       spect
PROBHD        5 mm CPPBBO BB
PULPROG       hsqcetgpsi2
TD            1024
SOLVENT       CDCl3
NS            32
DS            16
SWH           4302.926 Hz
FIDRES        4.202076 Hz
AQ            0.1190388 sec
RG            208.5
DW            116.200 usec
DE            10.00 usec
TE            297.0 K
CNST2         145.0000000
D0            0.00000300 sec
D1            1.46497905 sec
D4            0.00172414 sec
D11           0.03000000 sec
D16           0.00020000 sec
D24           0.00086207 sec
IN0           0.00002080 sec
ZGPTNS
  
```

```

===== CHANNEL f1 =====
SFO1         400.1320007 MHz
NUC1          1H
P1            11.50 usec
P2            23.00 usec
P28           0.00 usec
ND0           2
TD            256
SFO1         100.6233 MHz
FIDRES        93.900238 Hz
SW            238.896 ppm
FnMODE        Echo-Antiecho
SI            1024
SF            400.1300083 MHz
WDW           QSINE
SSB           2
LB            0.00 Hz
GB            0
PC            1.40
SI            1024
MC2           echo-antiecho
SF            100.6127571 MHz
WDW           QSINE
SSB           2
LB            0.00 Hz
GB            0
  
```

HSQC (400 MHz) spectrum of compound **3** in CDCl<sub>3</sub>

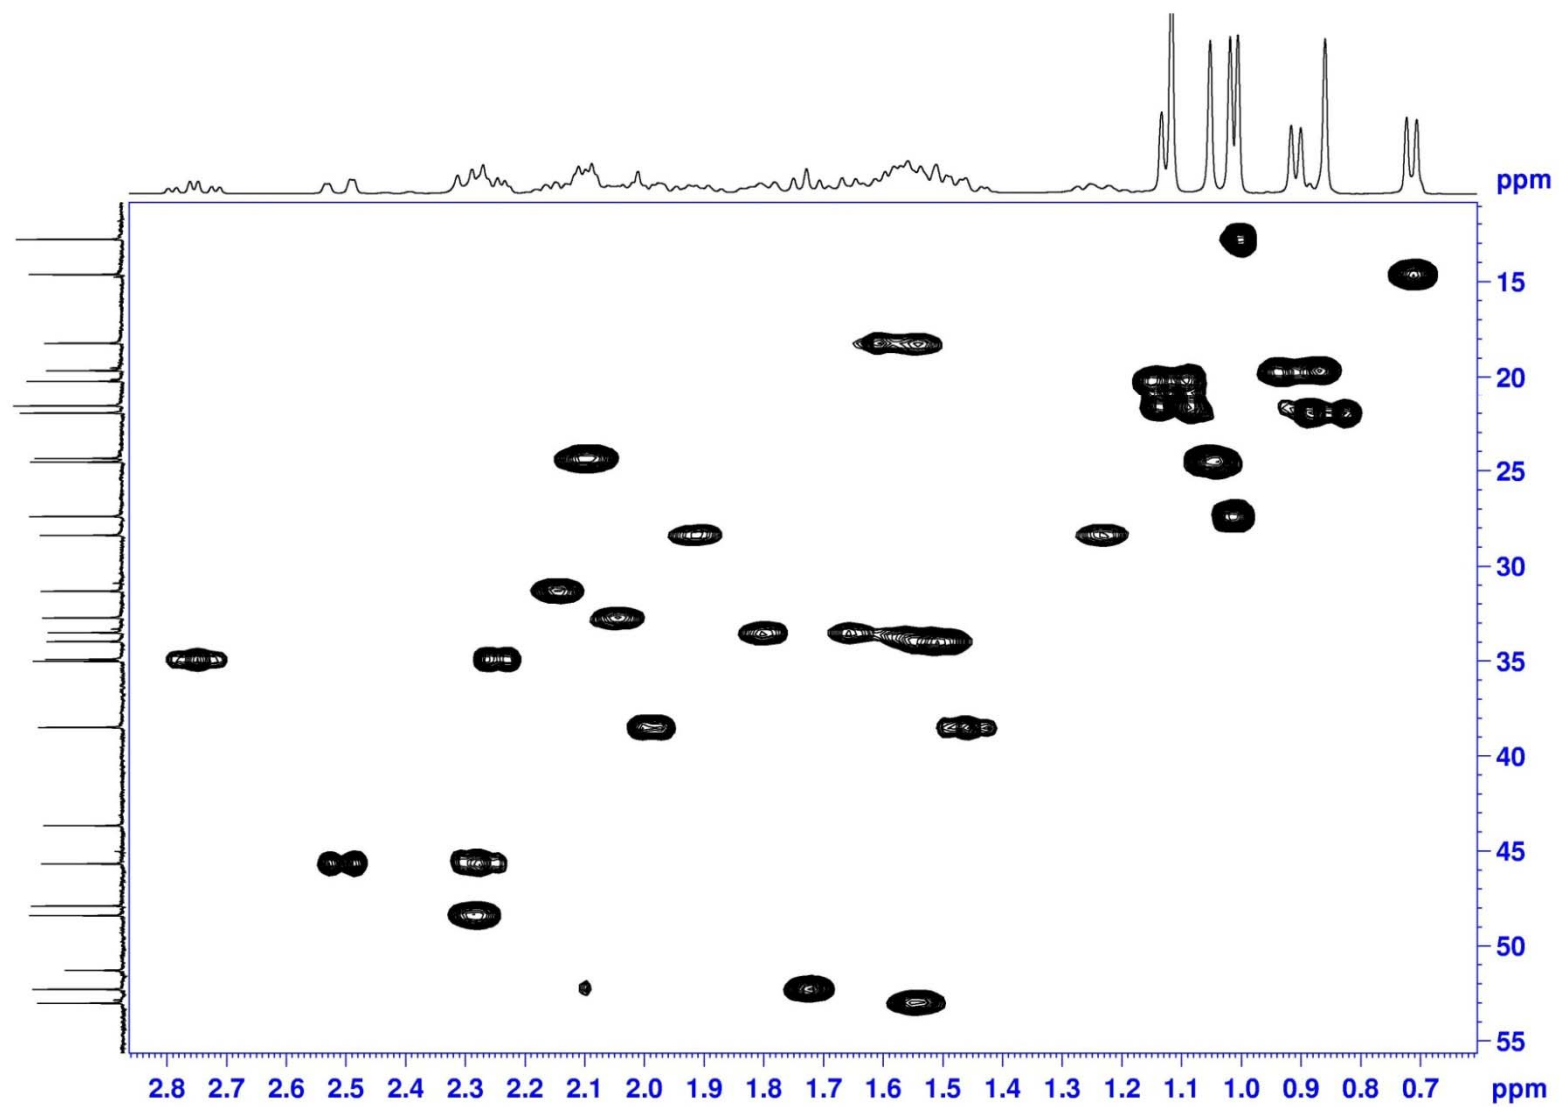

# HMBC (400 MHz) spectrum of compound **3** in CDCl<sub>3</sub>

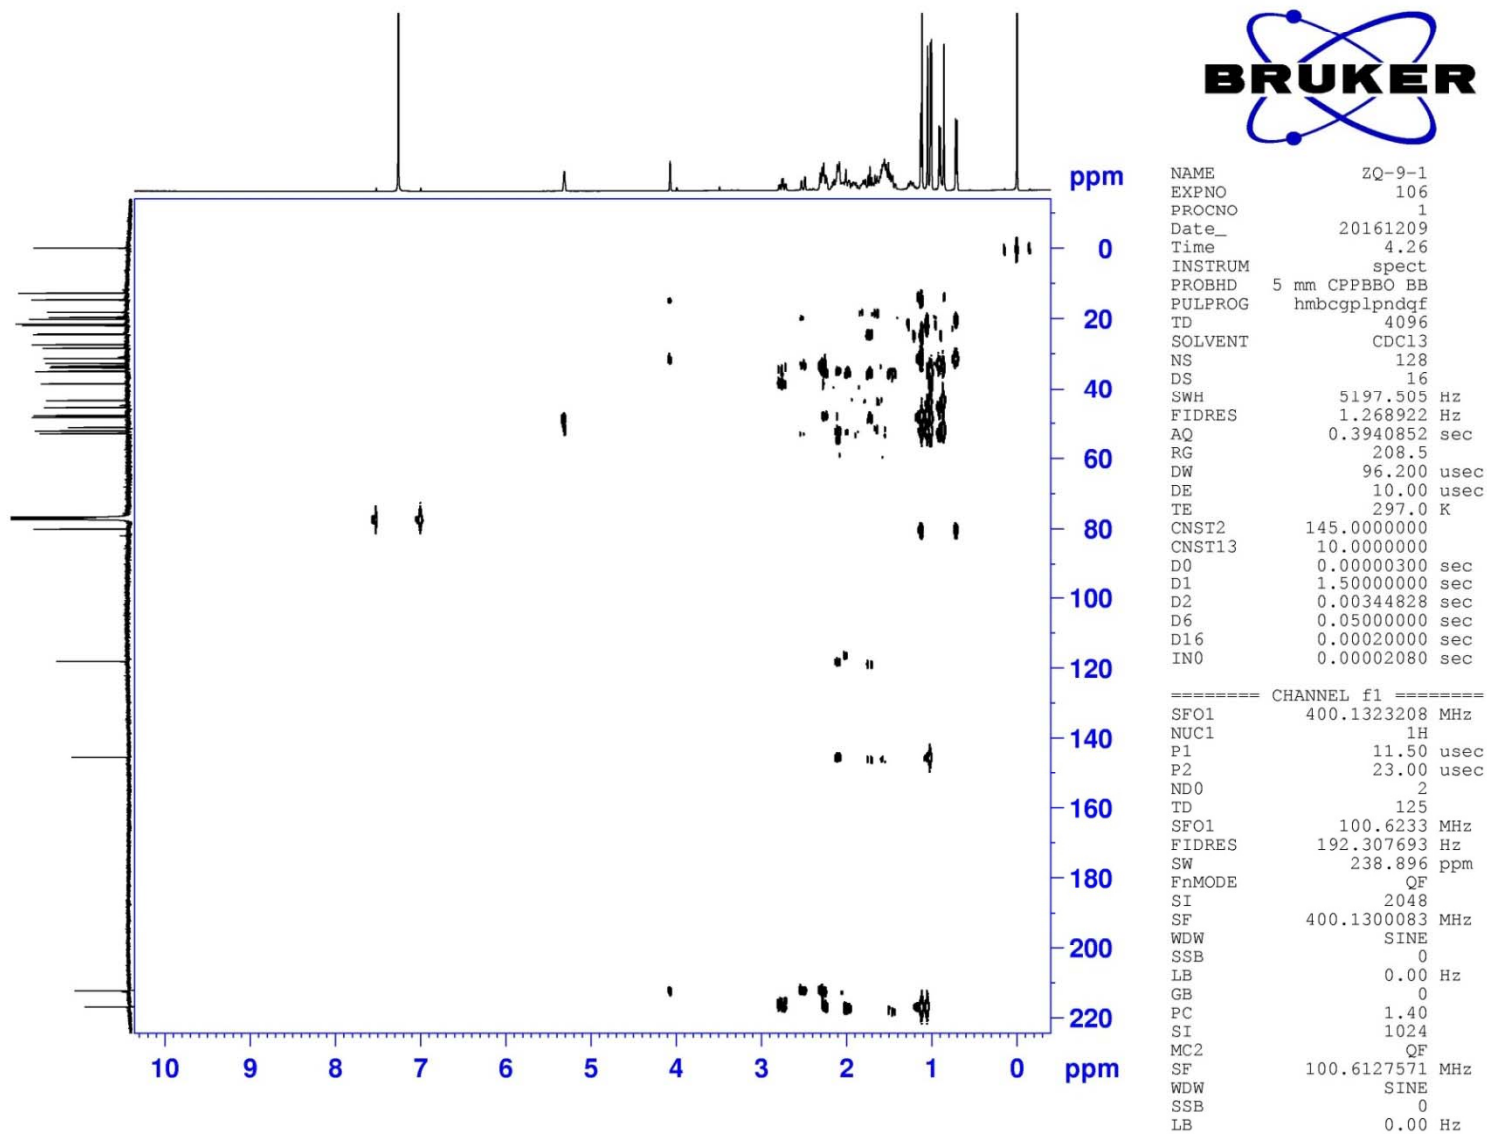

HMBC (400 MHz) spectrum of compound **3** in CDCl<sub>3</sub>

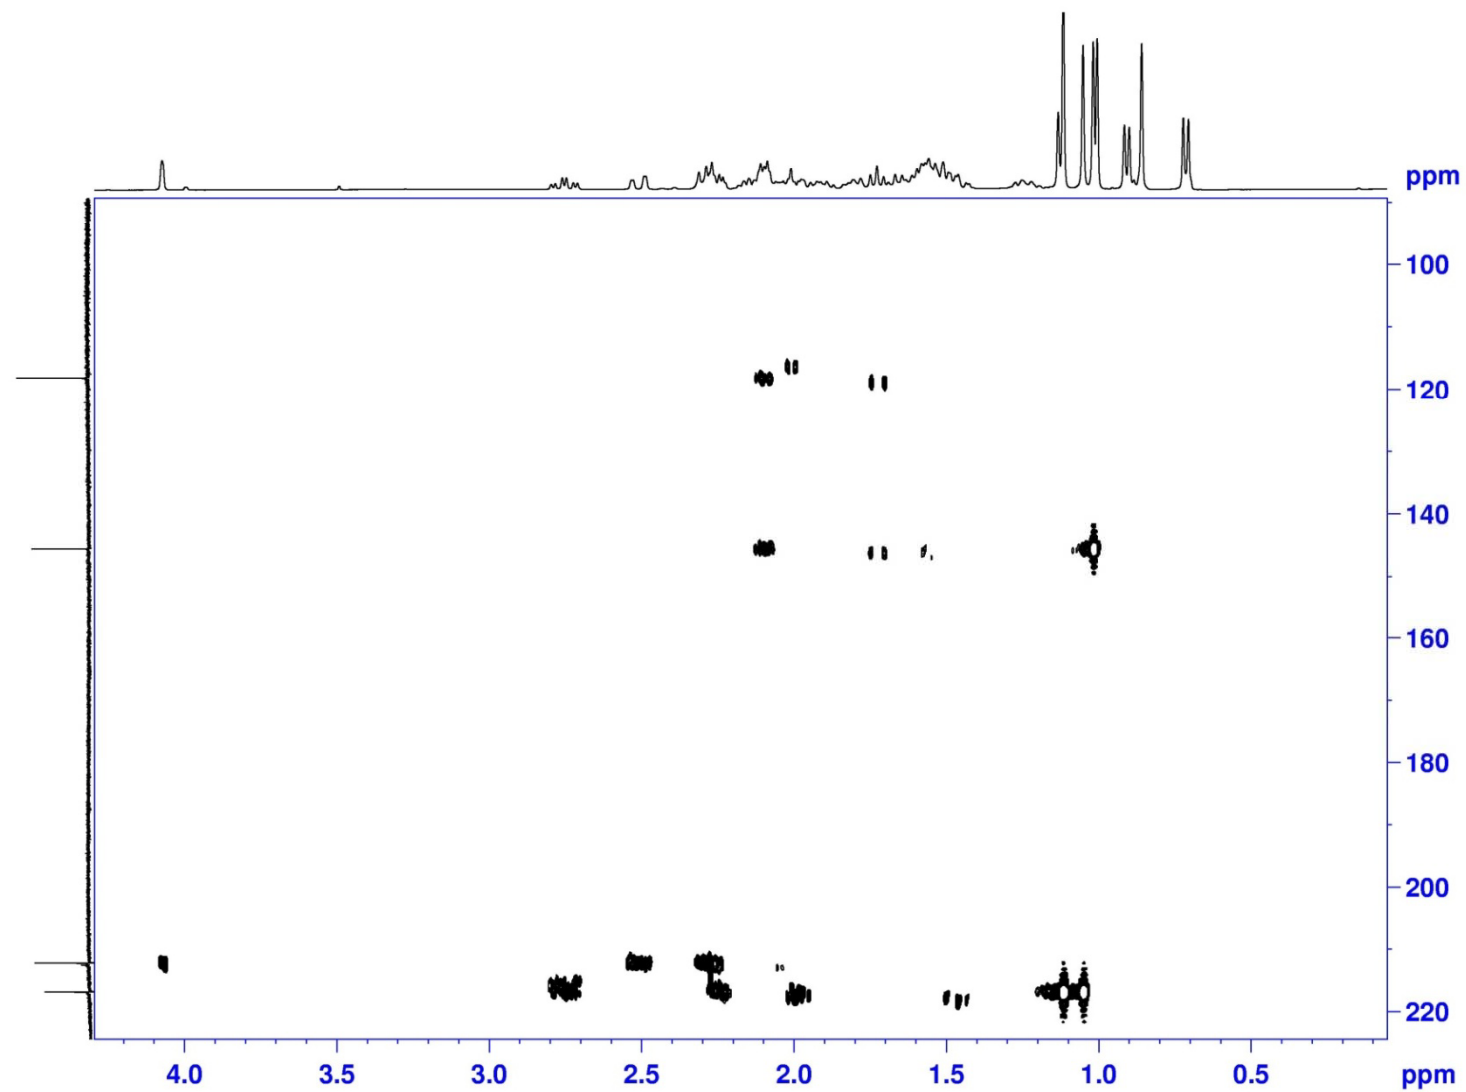

HMBC (400 MHz) spectrum of compound **3** in CDCl<sub>3</sub>

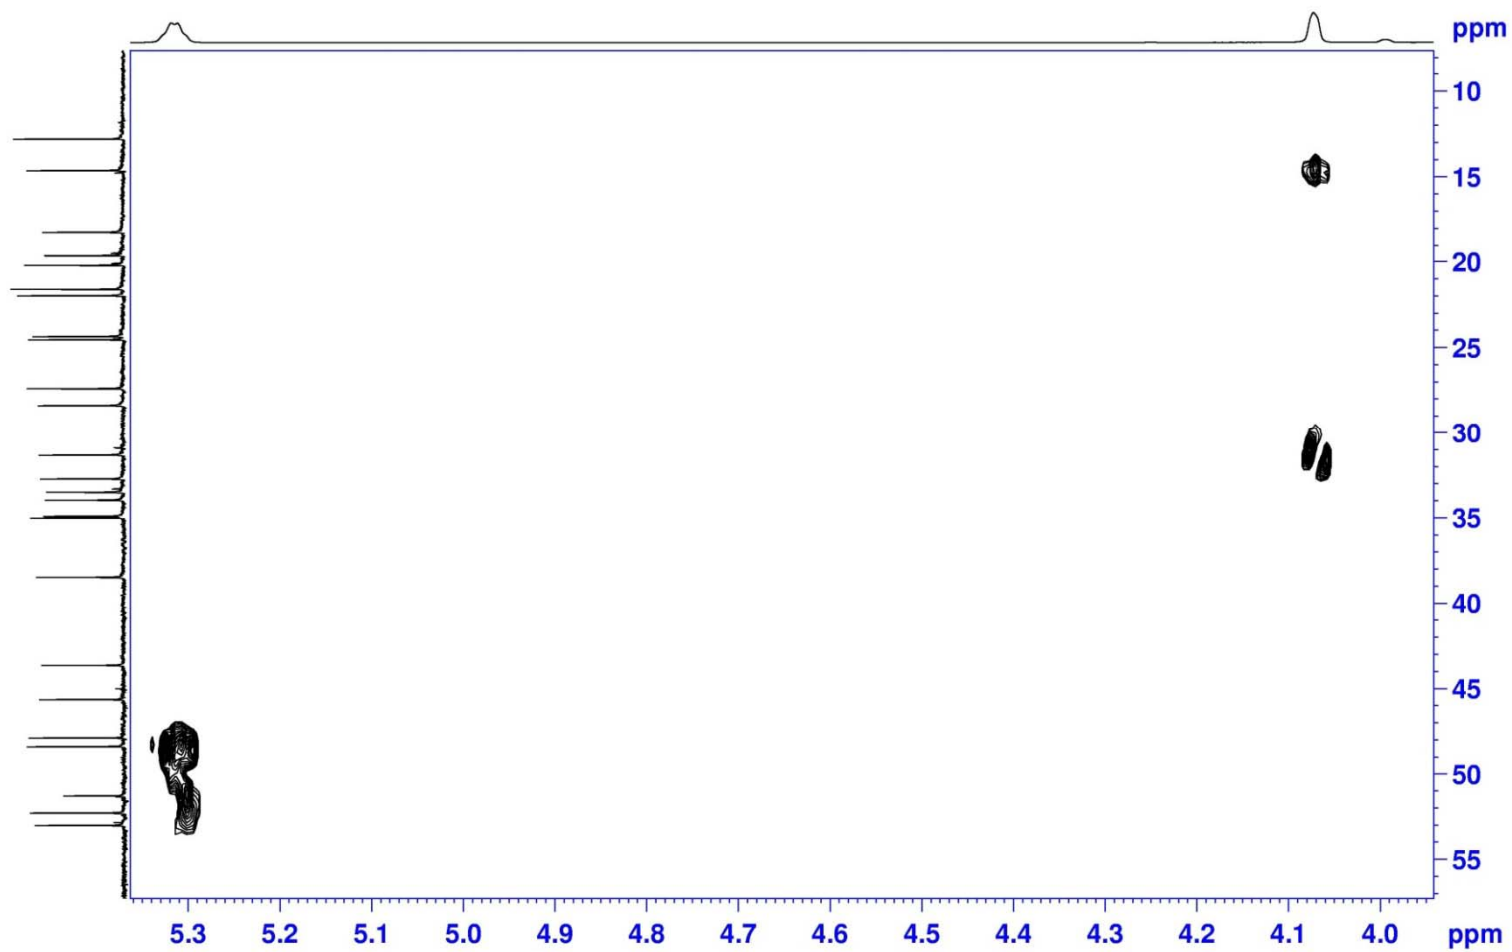



HMBC (400 MHz) spectrum of compound **3** in CDCl<sub>3</sub>

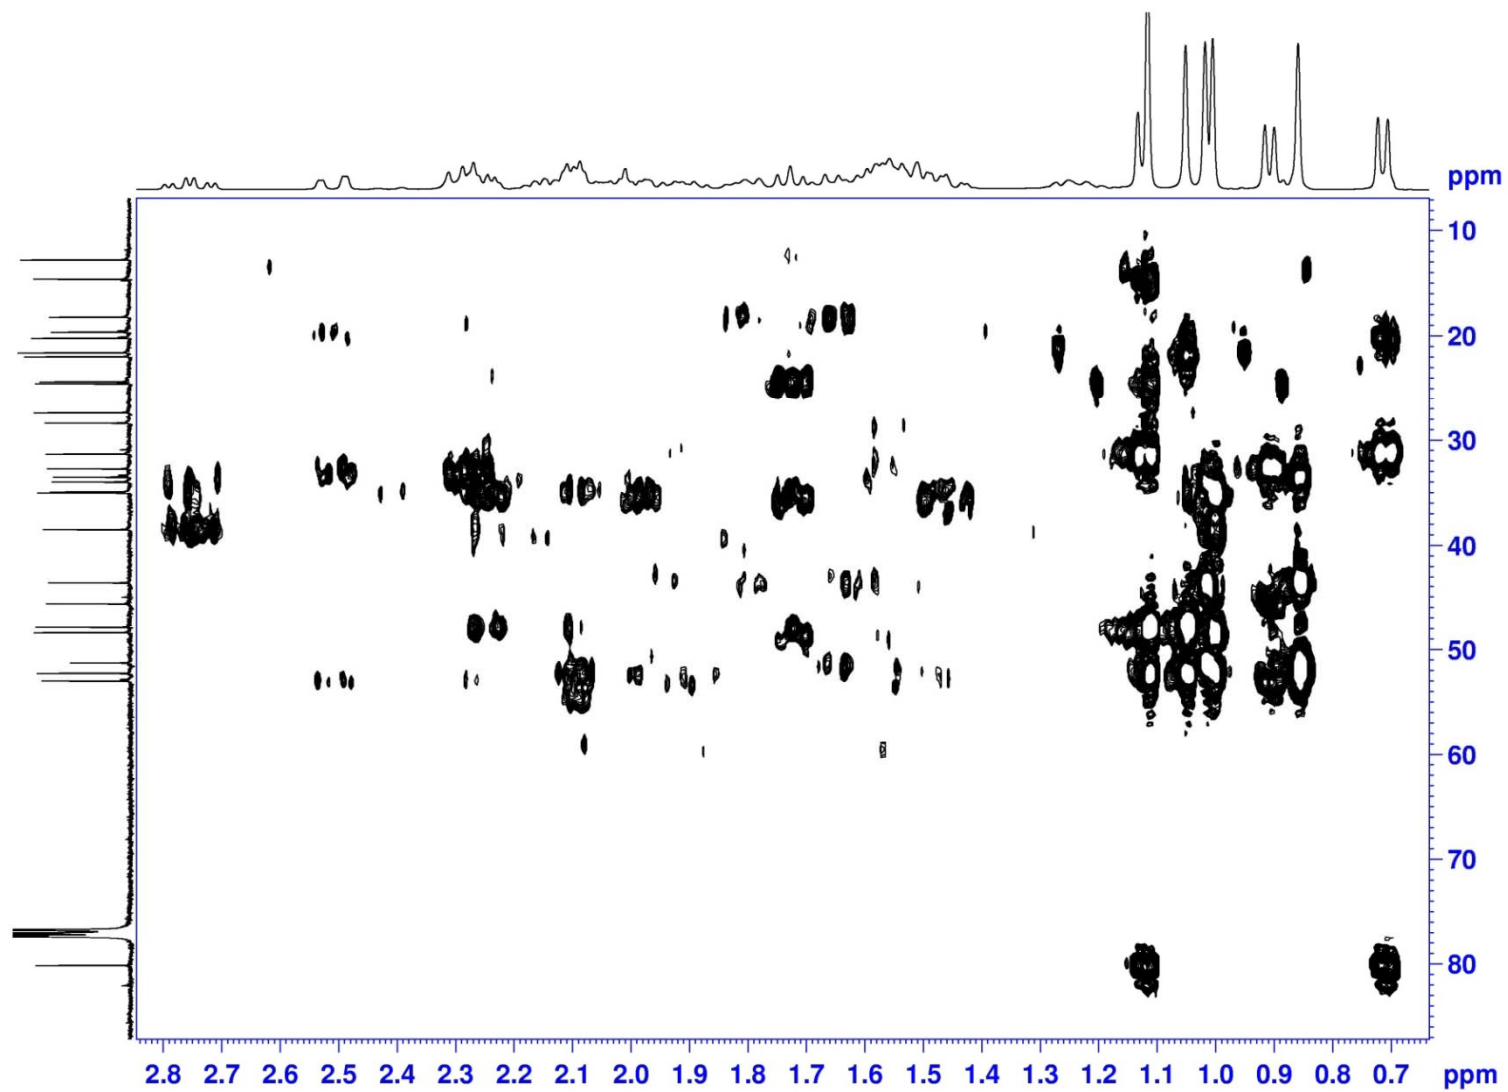

HMBC (400 MHz) spectrum of compound **3** in CDCl<sub>3</sub>

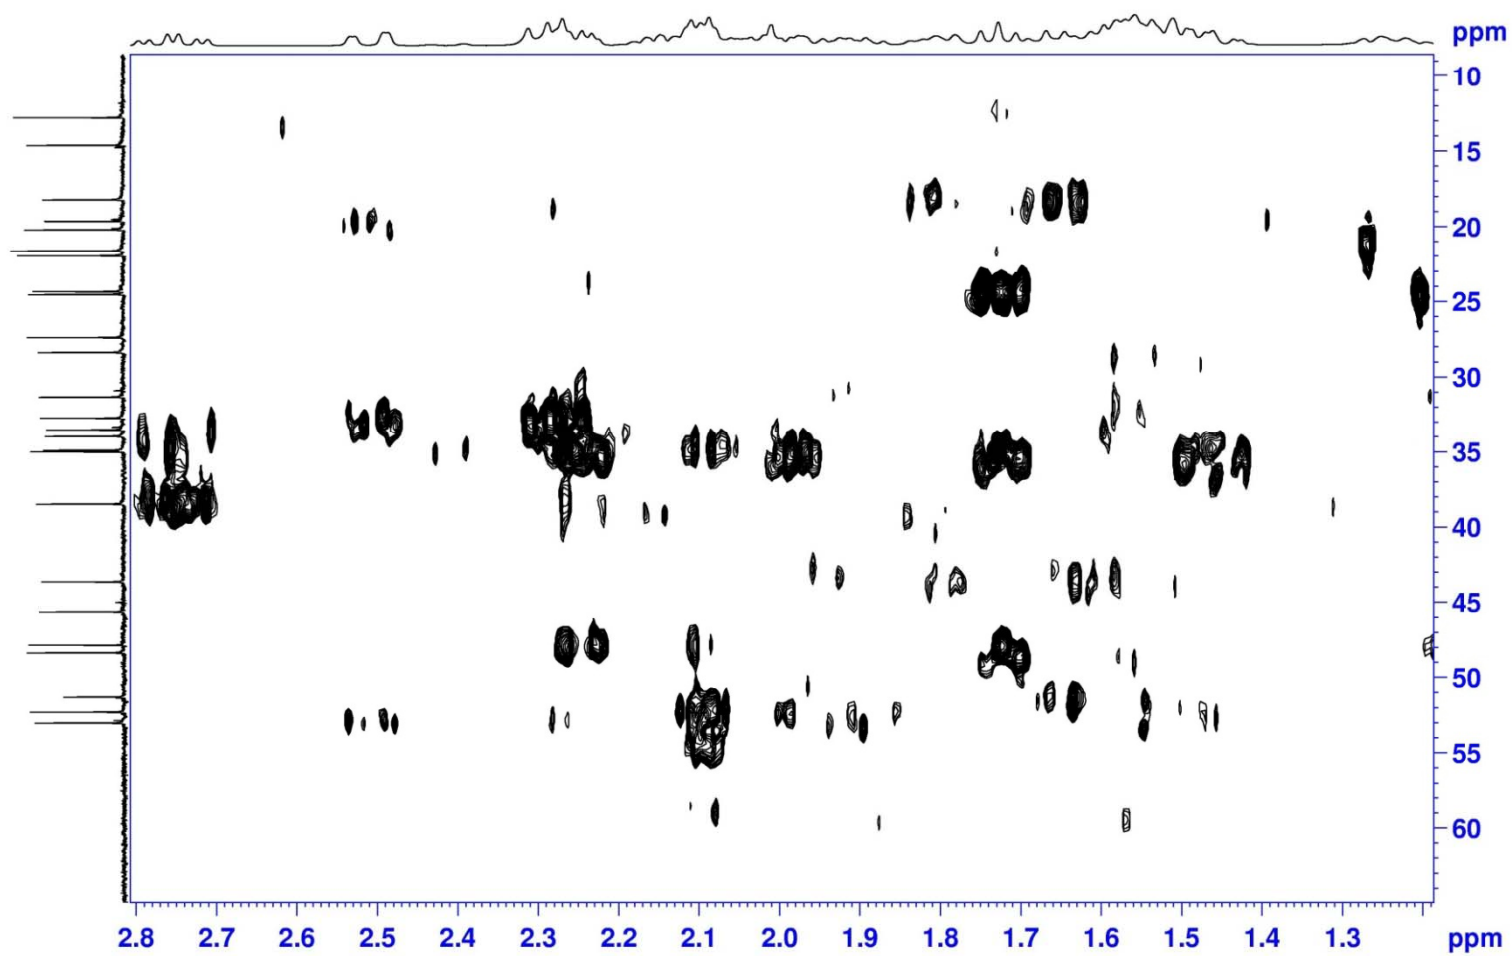

HMBC (400 MHz) spectrum of compound **3** in CDCl<sub>3</sub>

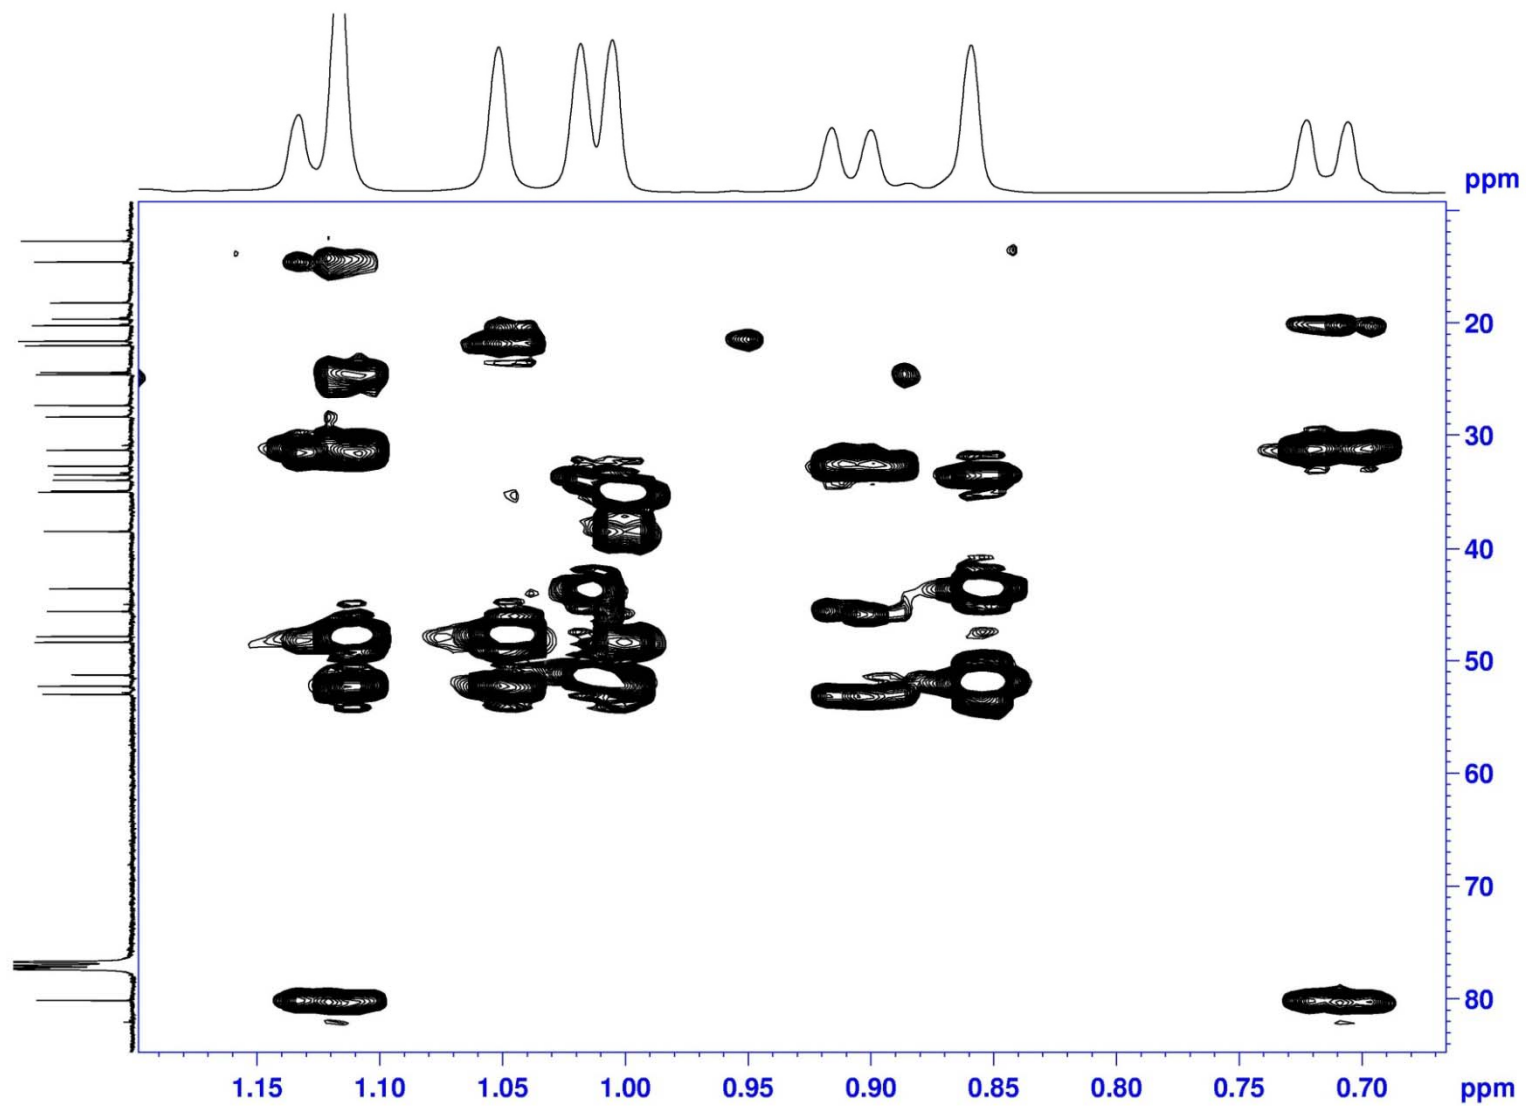

# NOESY (400 MHz) spectrum of compound **3** in CDCl<sub>3</sub>

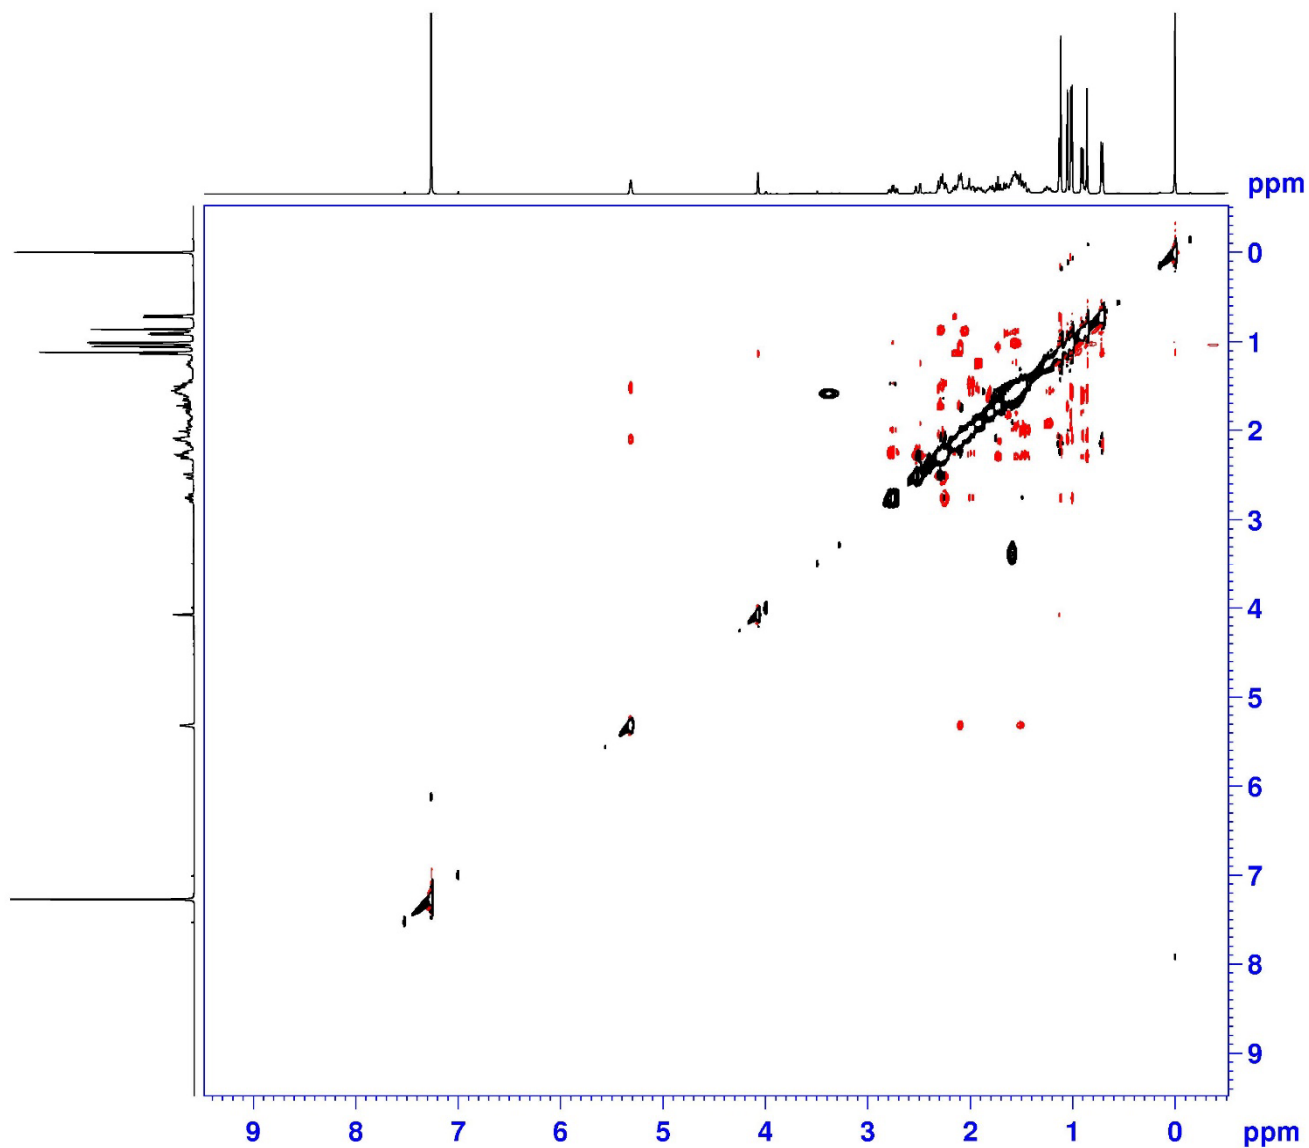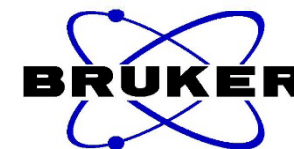

```

NAME                zq-9
EXPNO                7
PROCNO              1
Date_               20161208
Time                22.26
INSTRUM             spect
PROBHD              5 mm CPPBBO BB
PULPROG             noesygpphpp
TD                 2048
SOLVENT             CDCl3
NS                  32
DS                  32
SWH                 4000.000 Hz
FIDRES              1.953125 Hz
AQ                 0.2560500 sec
RG                  208.5
DW                 125.000 use
DE                  10.00 use
TE                  297.0 K
D0                 0.00011036 sec
D1                 1.99385595 sec
D8                 0.30000001 sec
D11                0.03000000 sec
D12                0.00002000 sec
D16                0.00020000 sec
IN0                0.00025000 sec
  
```

```

===== CHANNEL f1 =====
SFO1              400.1318006 MHz
NUC1               1H
P1                 11.50 use
P2                 23.00 use
P17                2500.00 use
ND0                1
TD                 256
SFO1              400.1318 MHz
FIDRES            15.625000 Hz
SW                 9.997 ppm
FnMODE            States-TPPI
SI                 1024
SF                 400.1300083 MHz
WDW                QSINE
SSB                2
LB                 0.00 Hz
GB                 0
PC                 1.00
SI                 1024
MC2                States-TPPI
SF                 400.1300083 MHz
WDW                QSINE
  
```

NOESY (400 MHz) spectrum of compound **3** in CDCl<sub>3</sub>

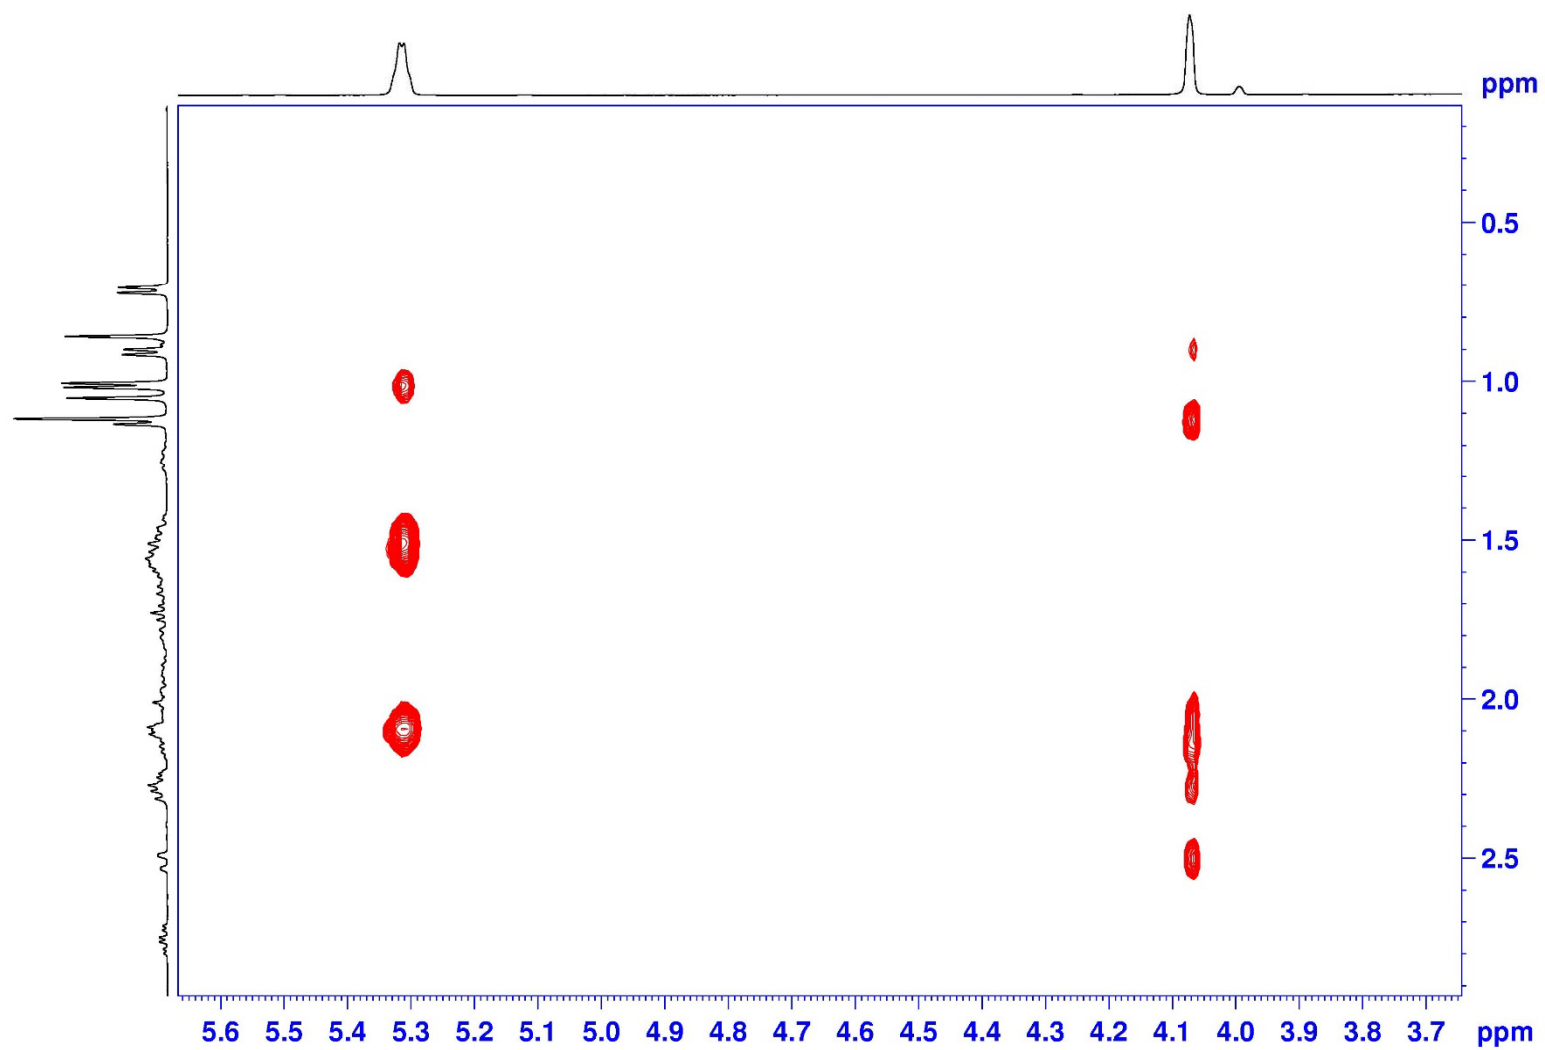

NOESY (400 MHz) spectrum of compound **3** in  $\text{CDCl}_3$

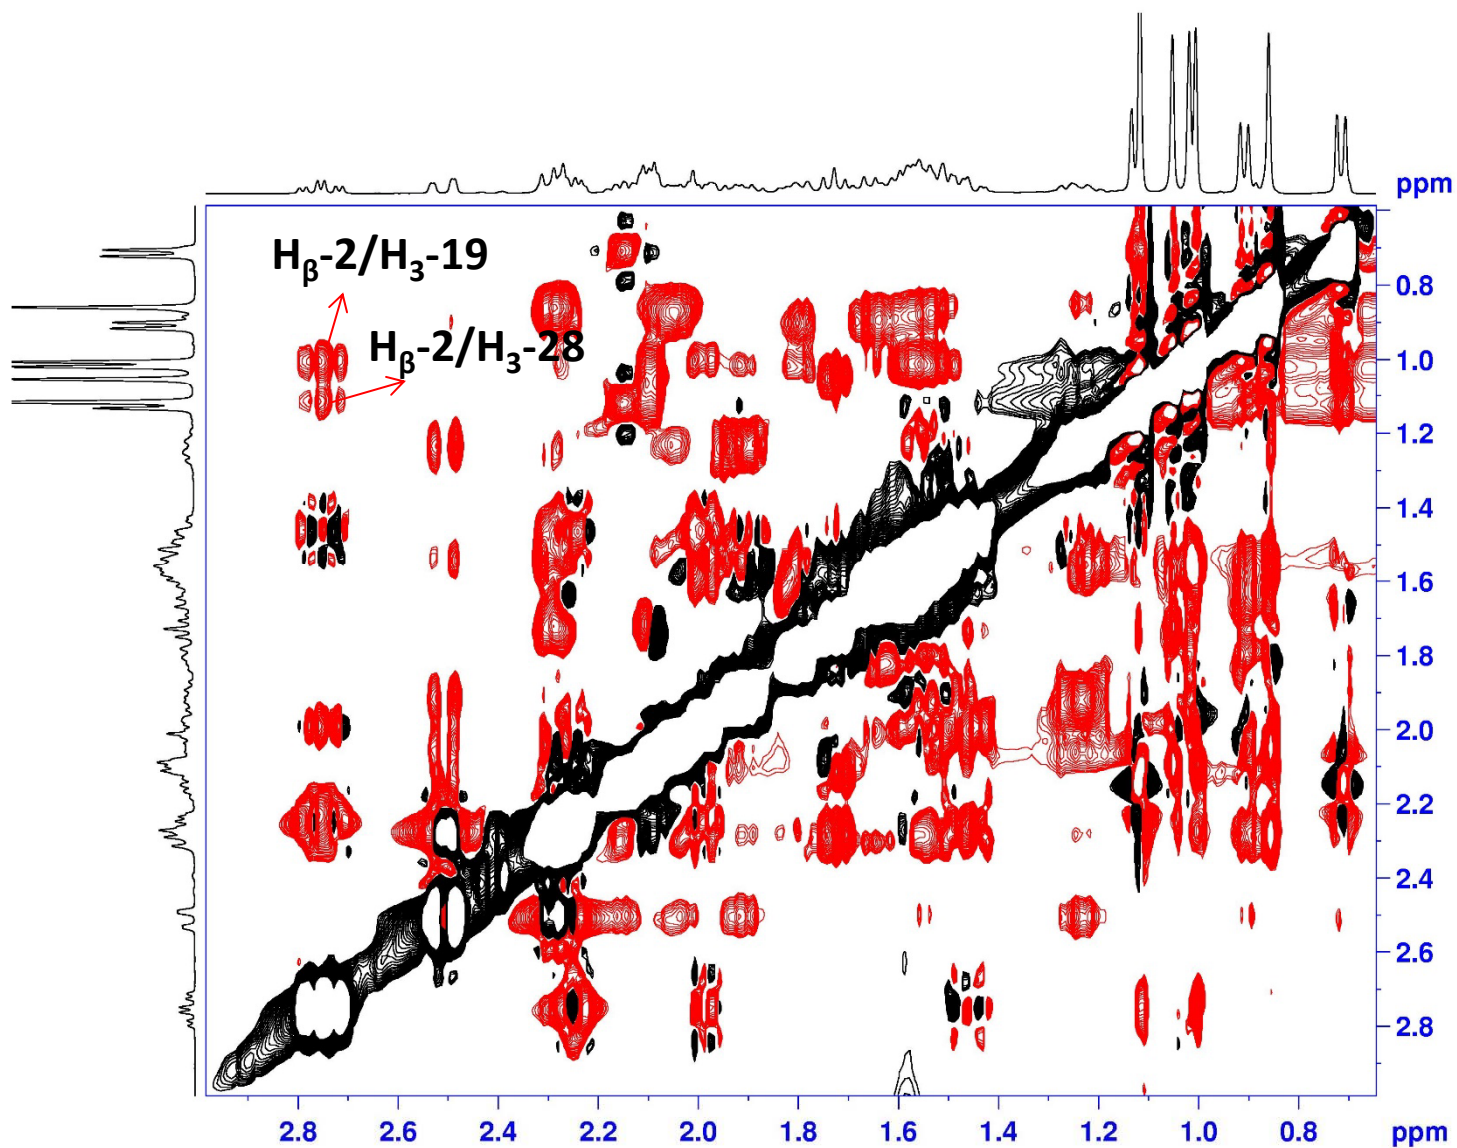



NOESY (400 MHz) spectrum of compound **3** in  $\text{CDCl}_3$

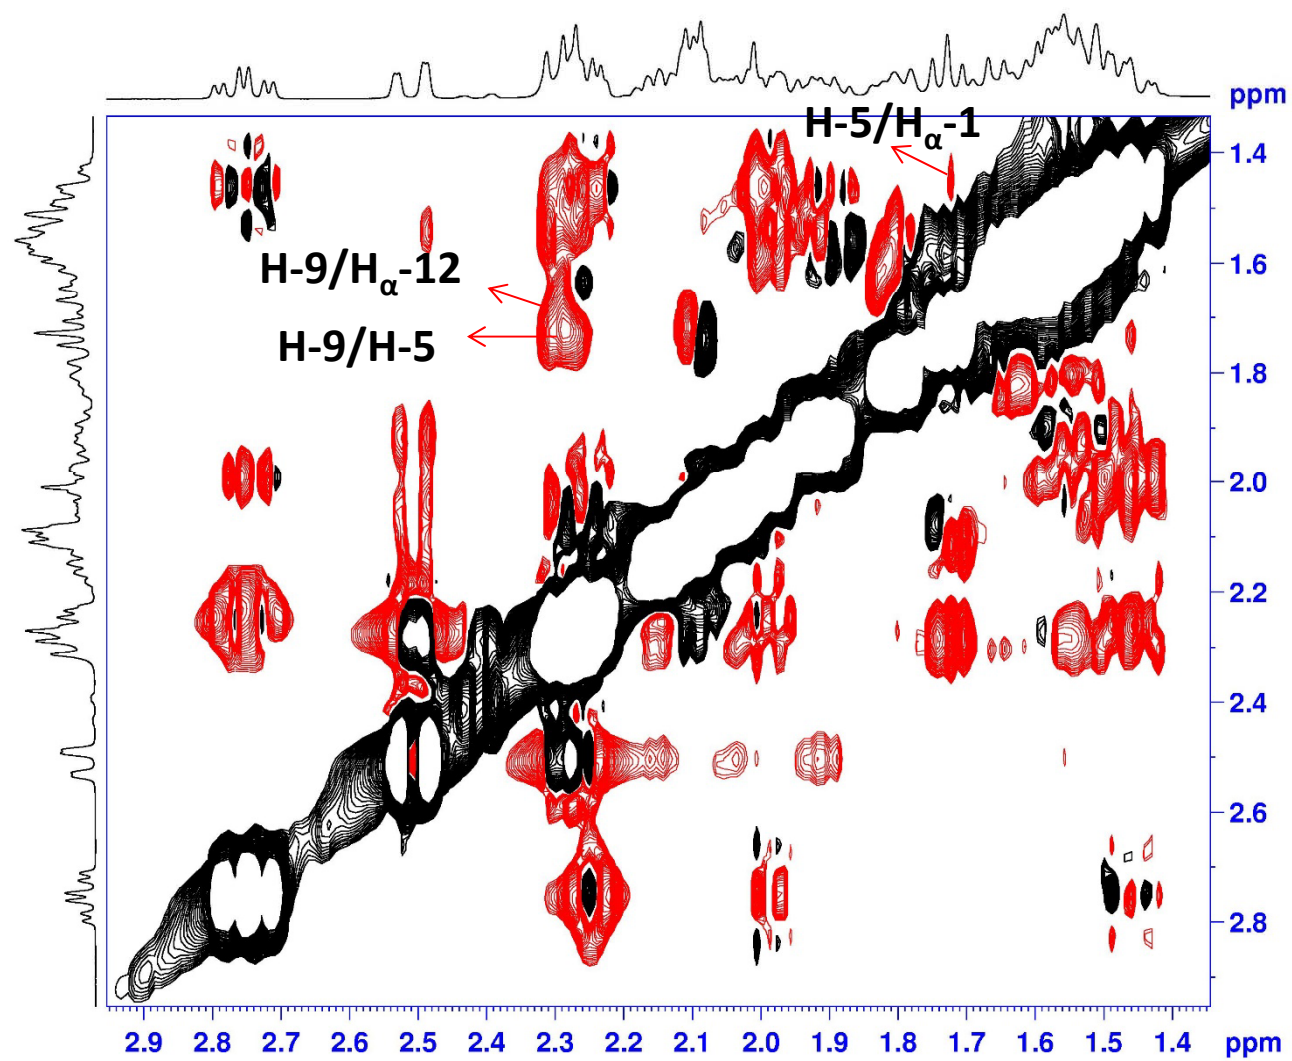

NOESY (400 MHz) spectrum of compound **3** in  $\text{CDCl}_3$

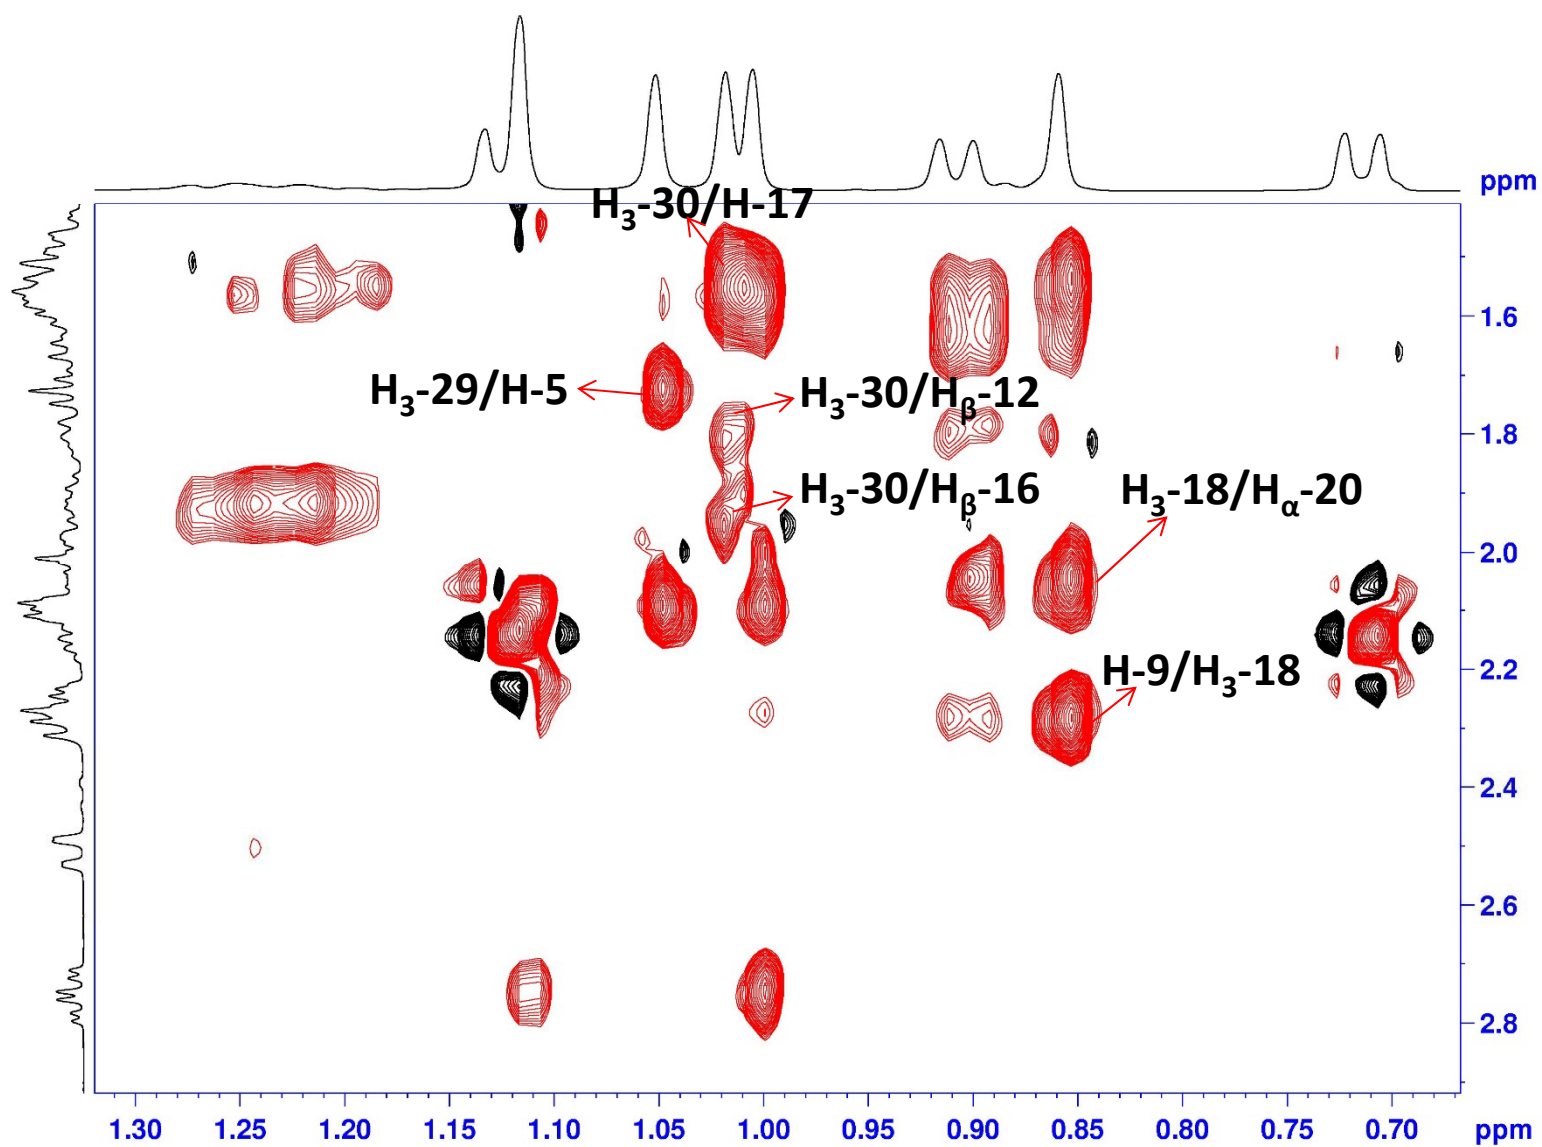



# HR-ESIMS for compound 4

## Generic Display Report

### Analysis Info

Analysis Name D:\Data\MS\data\201802\liwanshan\_XG-53-5\_neg\_55\_01\_4273.d  
Method LC\_Direct Infusion\_neg\_100-1000mz.m  
Sample Name liwanshan\_XG-53-5\_neg  
Comment

Acquisition Date 2/8/2018 5:09:54 PM

Operator SCSIO  
Instrument maXis

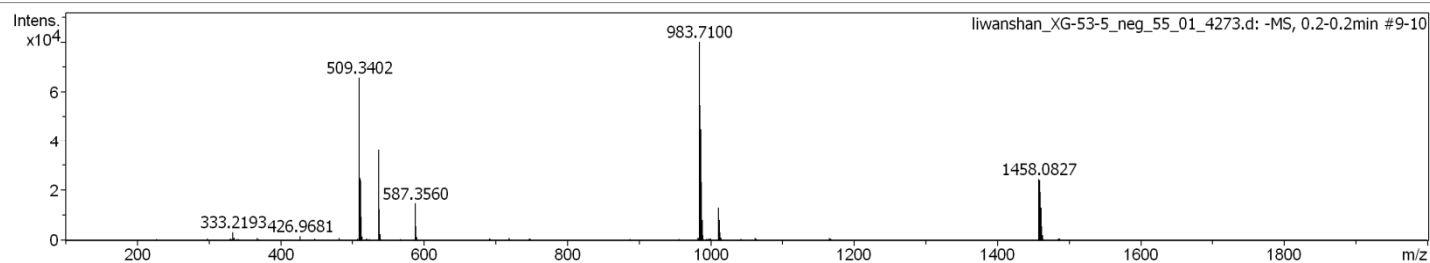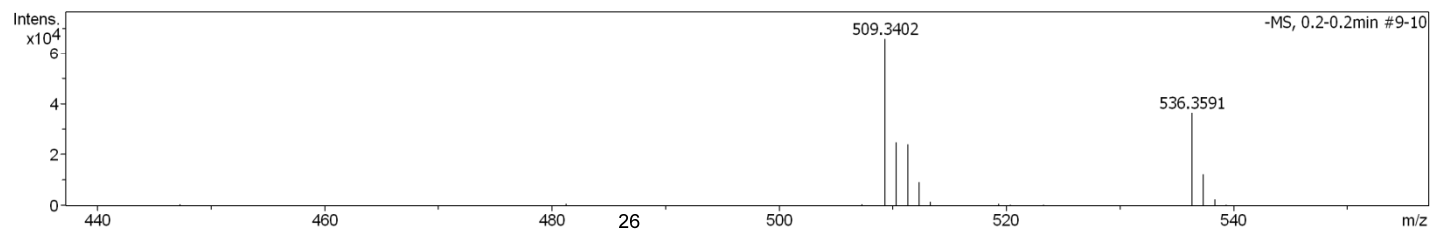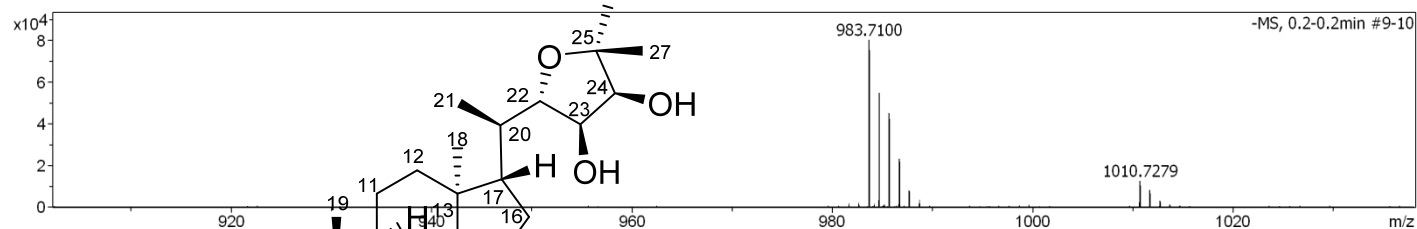

Bruker Compass DataAnalysis 4.1

Printed: 2/8/2018 5:24:24 PM

by: SCSIO

Page 1 of 1

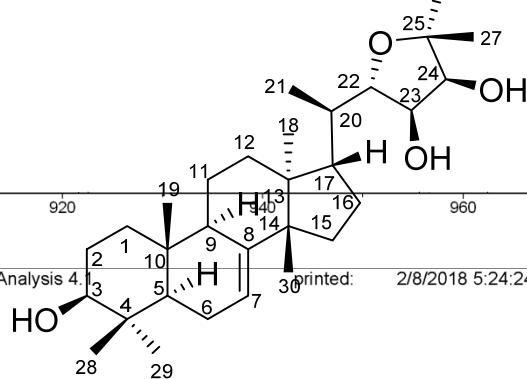

# HR-ESIMS for compound 4

## Mass Spectrum SmartFormula Report

### Analysis Info

Analysis Name D:\Data\MS\data\201802\liwanshan\_XG-53-5\_neg\_55\_01\_4273.d  
Method LC\_Direct Infusion\_neg\_100-1000mz.m  
Sample Name liwanshan\_XG-53-5\_neg  
Comment

Acquisition Date 2/8/2018 5:09:54 PM

Operator SCSIO  
Instrument maXis 255552.00029

### Acquisition Parameter

|             |          |                      |          |                  |           |
|-------------|----------|----------------------|----------|------------------|-----------|
| Source Type | ESI      | Ion Polarity         | Negative | Set Nebulizer    | 0.4 Bar   |
| Focus       | Active   | Set Capillary        | 4000 V   | Set Dry Heater   | 180 °C    |
| Scan Begin  | 100 m/z  | Set End Plate Offset | -500 V   | Set Dry Gas      | 4.0 l/min |
| Scan End    | 2000 m/z | Set Charging Voltage | 0 V      | Set Divert Valve | Waste     |
|             |          | Set Corona           | 0 nA     | Set APCI Heater  | 0 °C      |

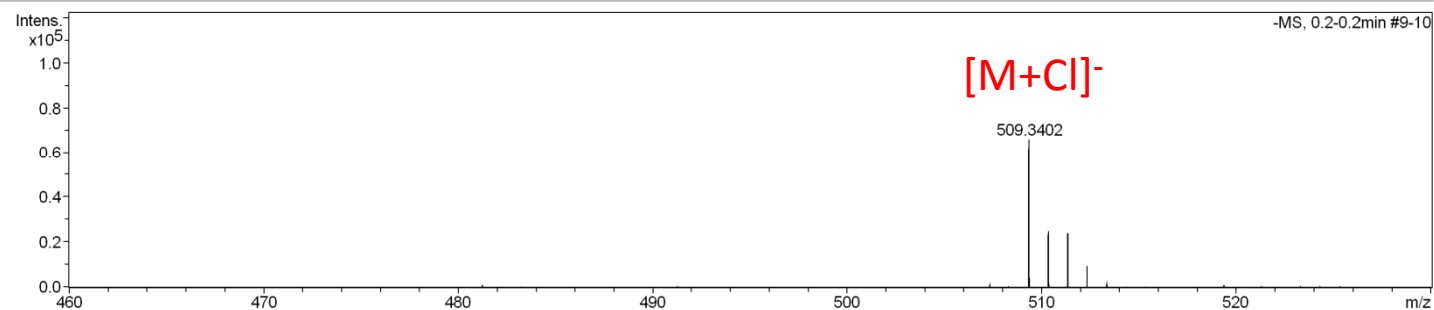

| Meas. m/z | # | Ion Formula | Score  | m/z      | err [ppm] | err [mDa] | mSigma | rdb  | e <sup>-</sup> Conf | N-Rule |
|-----------|---|-------------|--------|----------|-----------|-----------|--------|------|---------------------|--------|
| 509.3402  | 1 | C30H50ClO4  | 100.00 | 509.3403 | -0.2      | -0.1      | 25.2   | 5.5  | even                | ok     |
| 983.7100  | 1 | C60H100ClO8 | 72.88  | 983.7112 | -1.3      | -1.2      | 12.6   | 10.5 | even                | ok     |

liwanshan\_XG-53-5\_neg\_55\_01\_4273.d  
Bruker Compass DataAnalysis 4.1

printed: 2/8/2018 5:23:39 PM

by: SCSIO

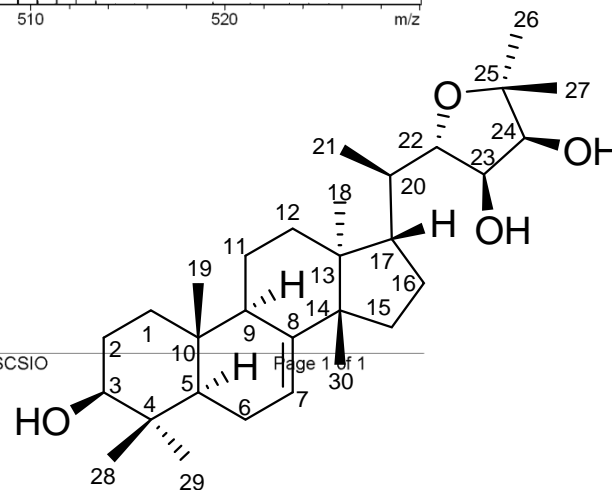

$^1\text{H}$  NMR (400 MHz) spectrum of compound **4** in  $\text{CDCl}_3$

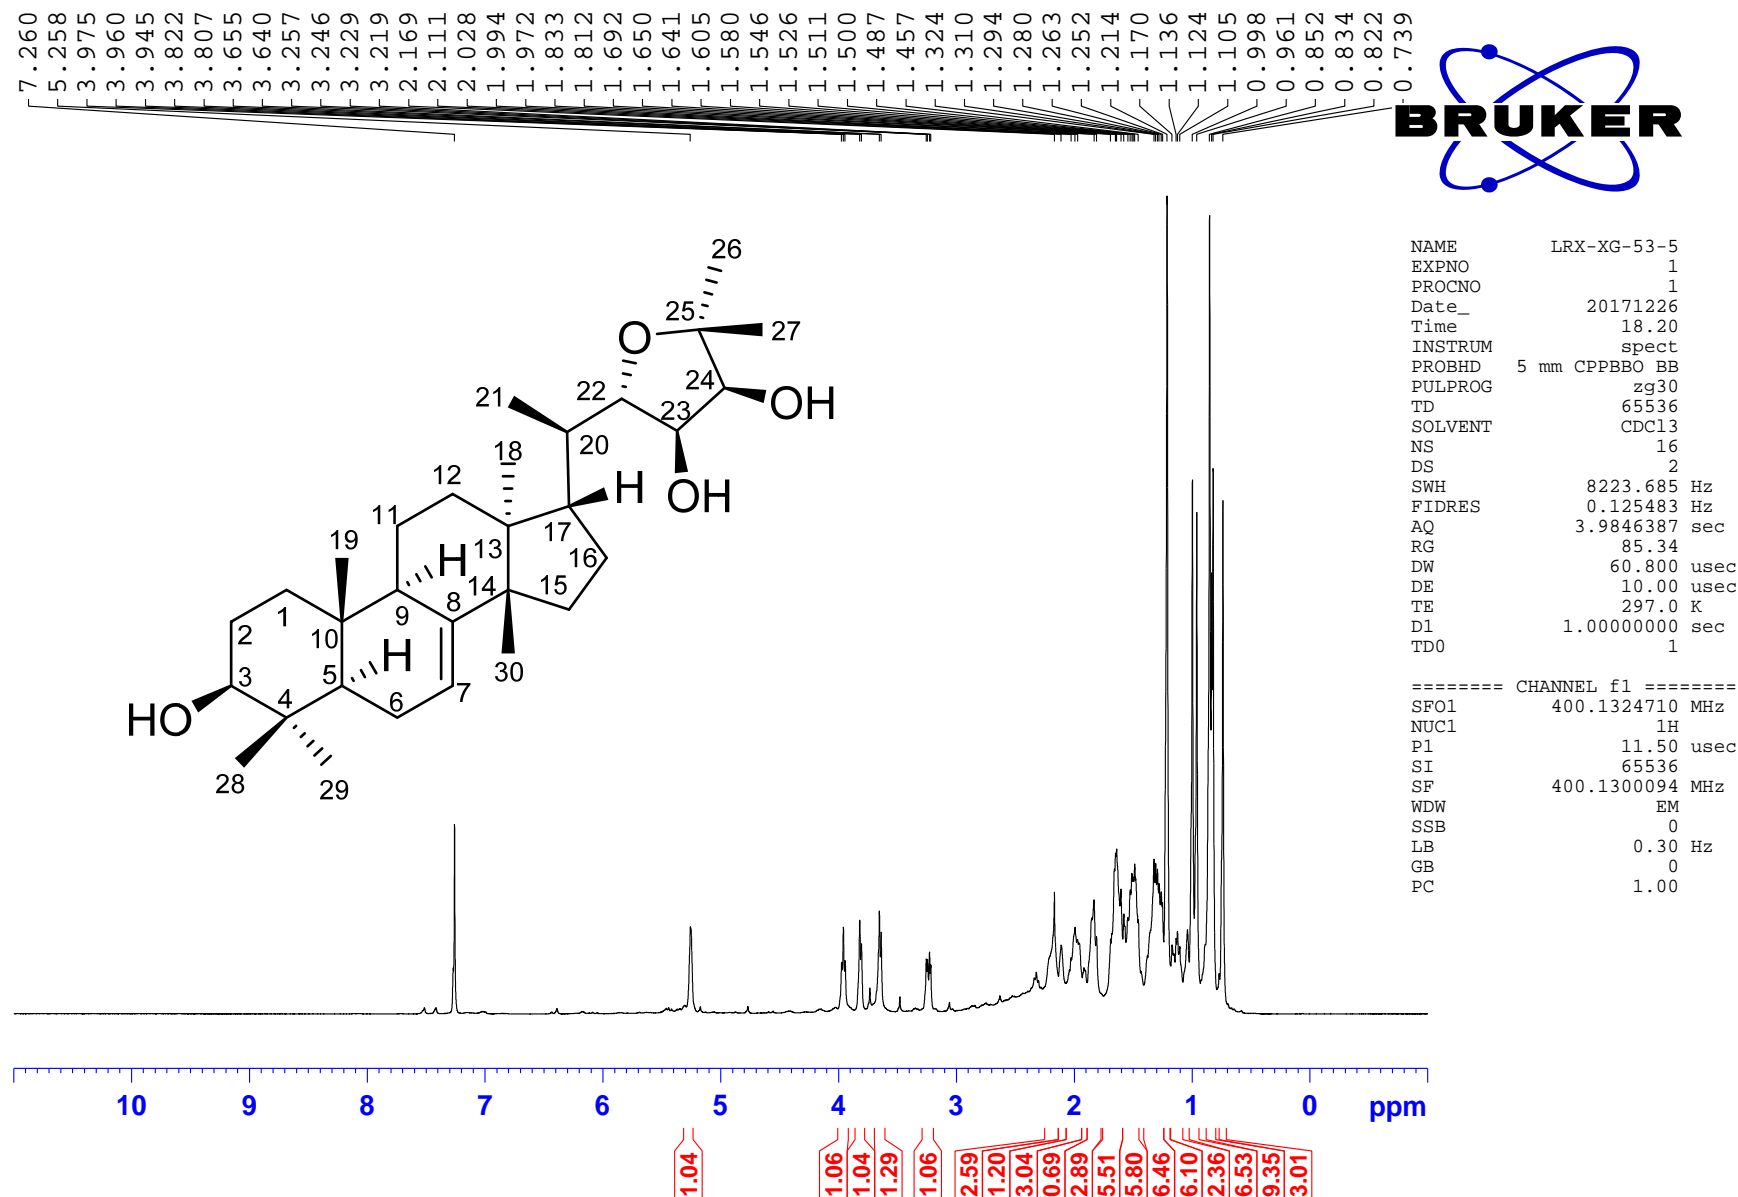

$^1\text{H}$  NMR (400 MHz) spectrum of compound **4** in  $\text{CDCl}_3$

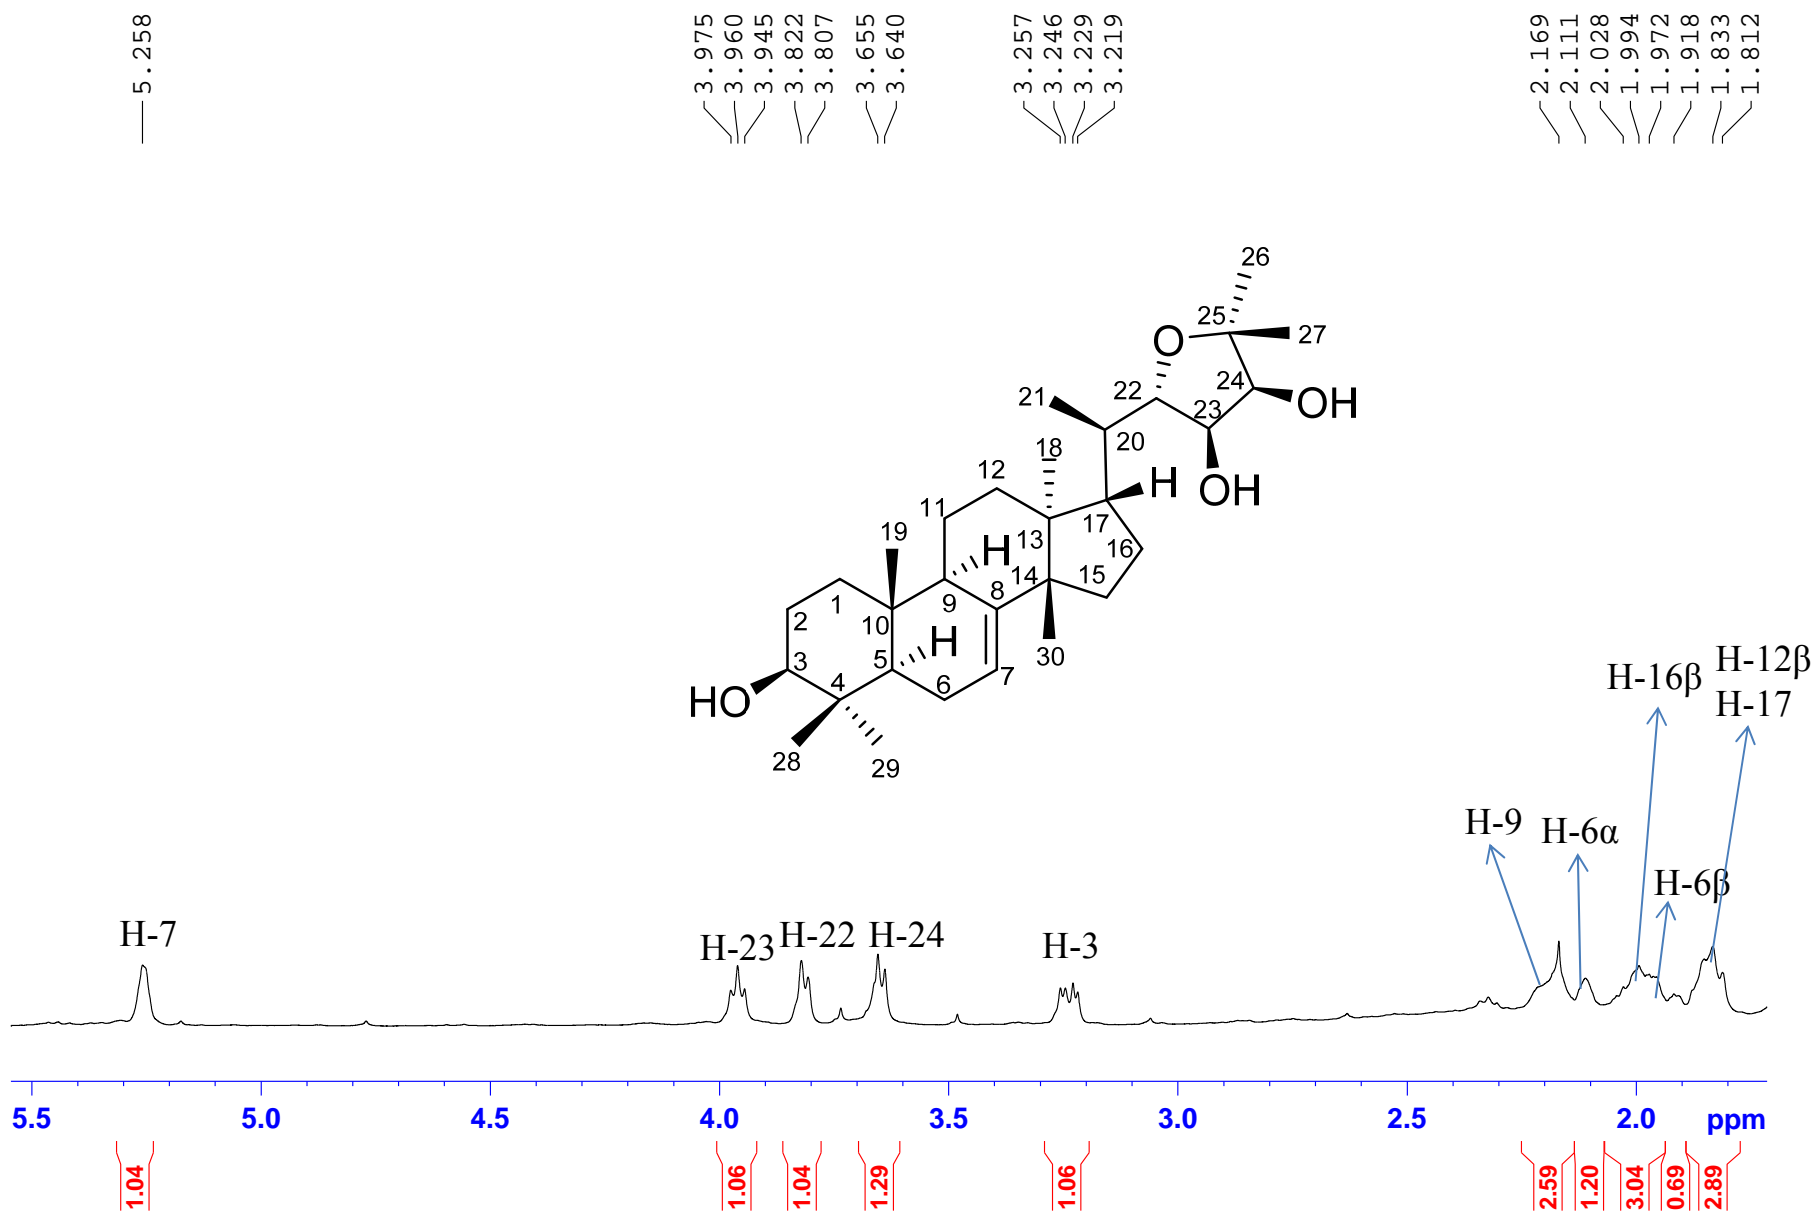

$^1\text{H}$  NMR (400 MHz) spectrum of compound **4** in  $\text{CDCl}_3$

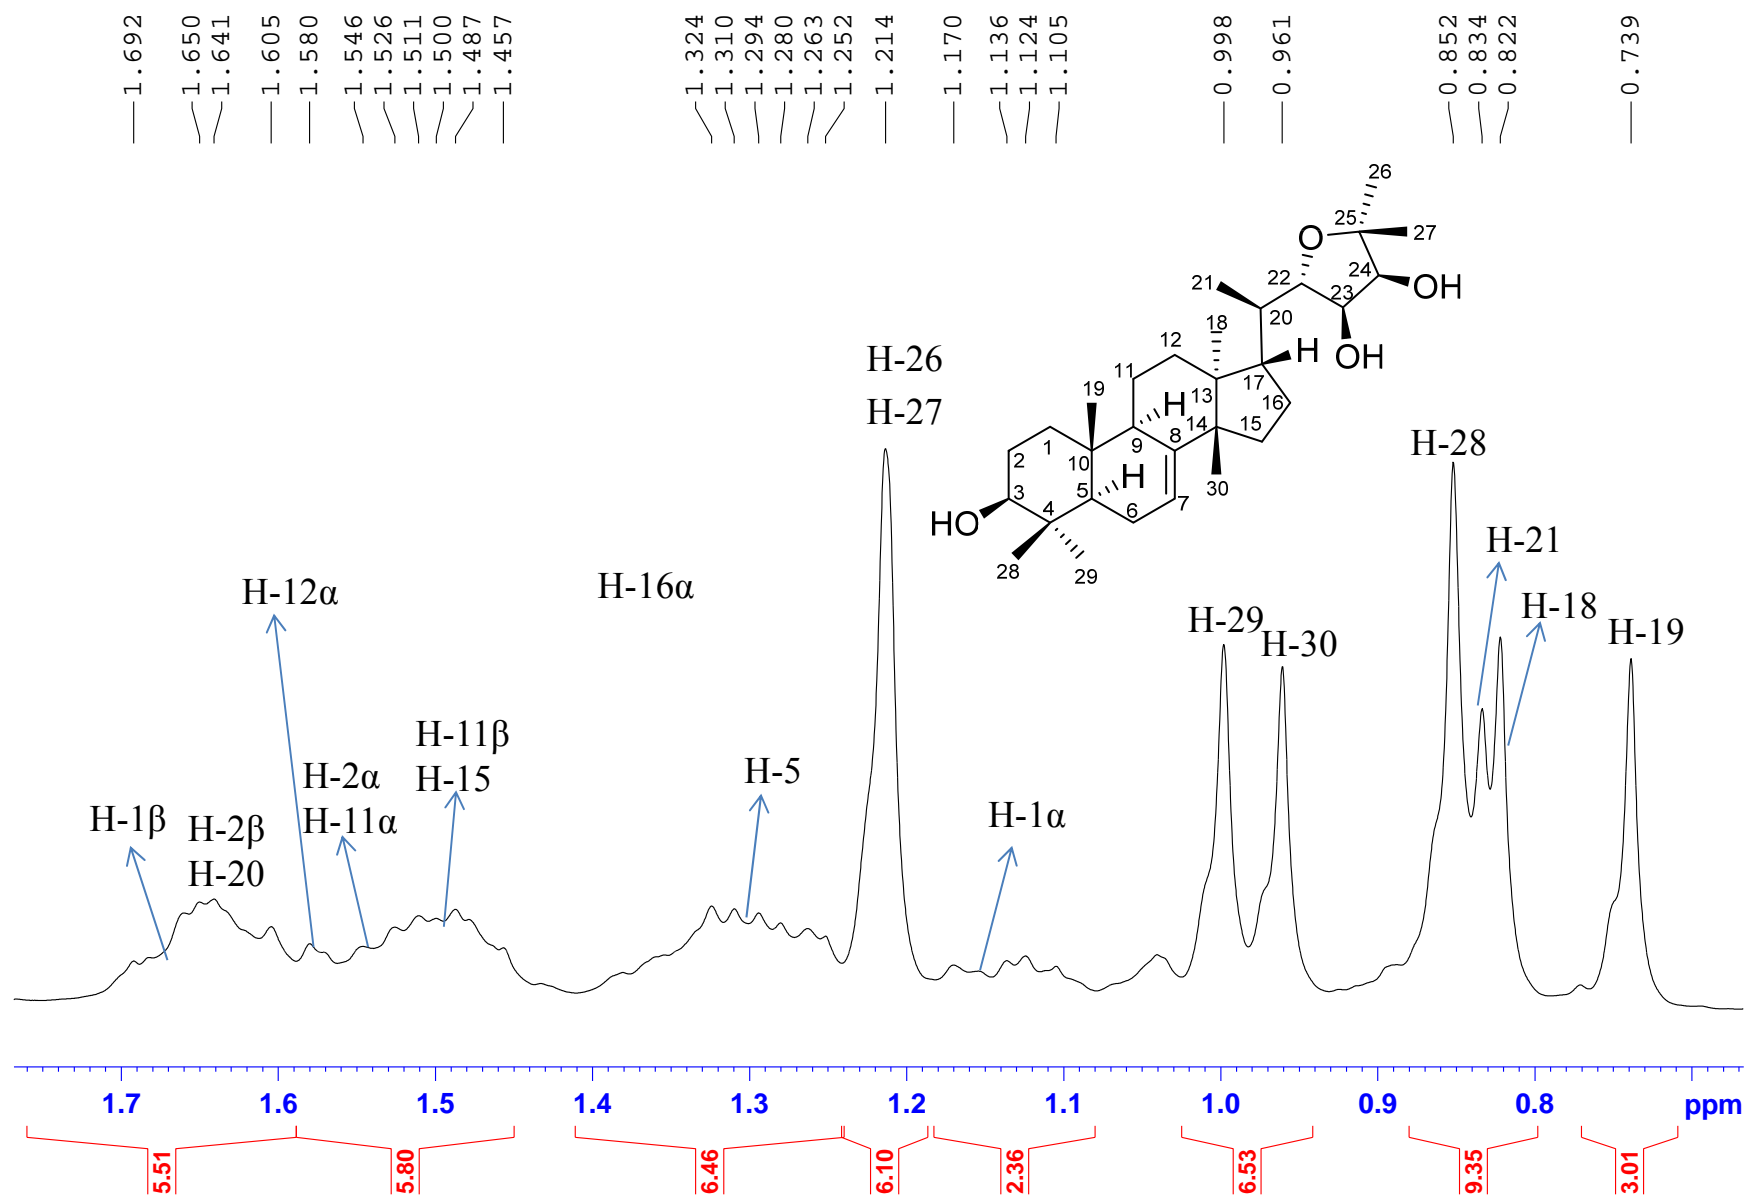

$^{13}\text{C}$  NMR (100 MHz) spectrum of compound **4** in  $\text{CDCl}_3$

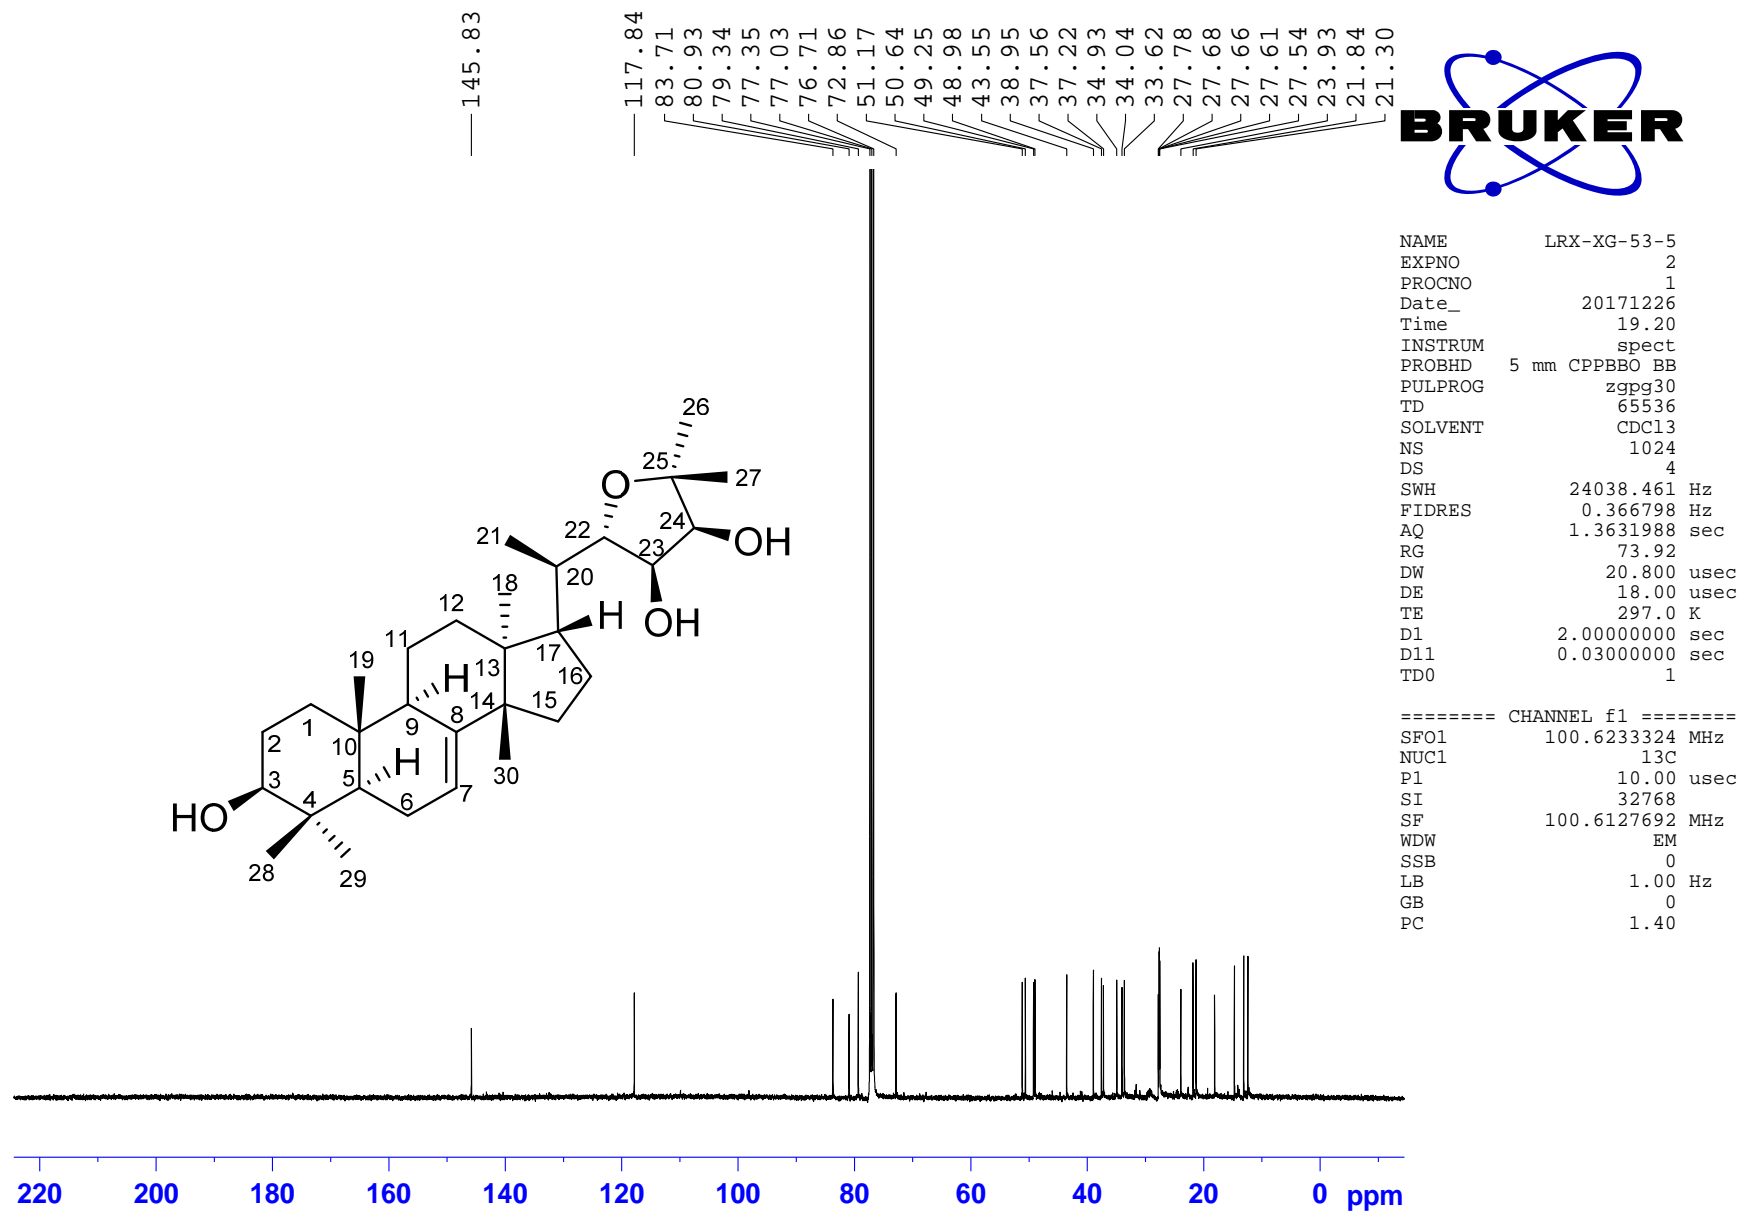

$^{13}\text{C}$  NMR (100 MHz) spectrum of compound **4** in  $\text{CDCl}_3$

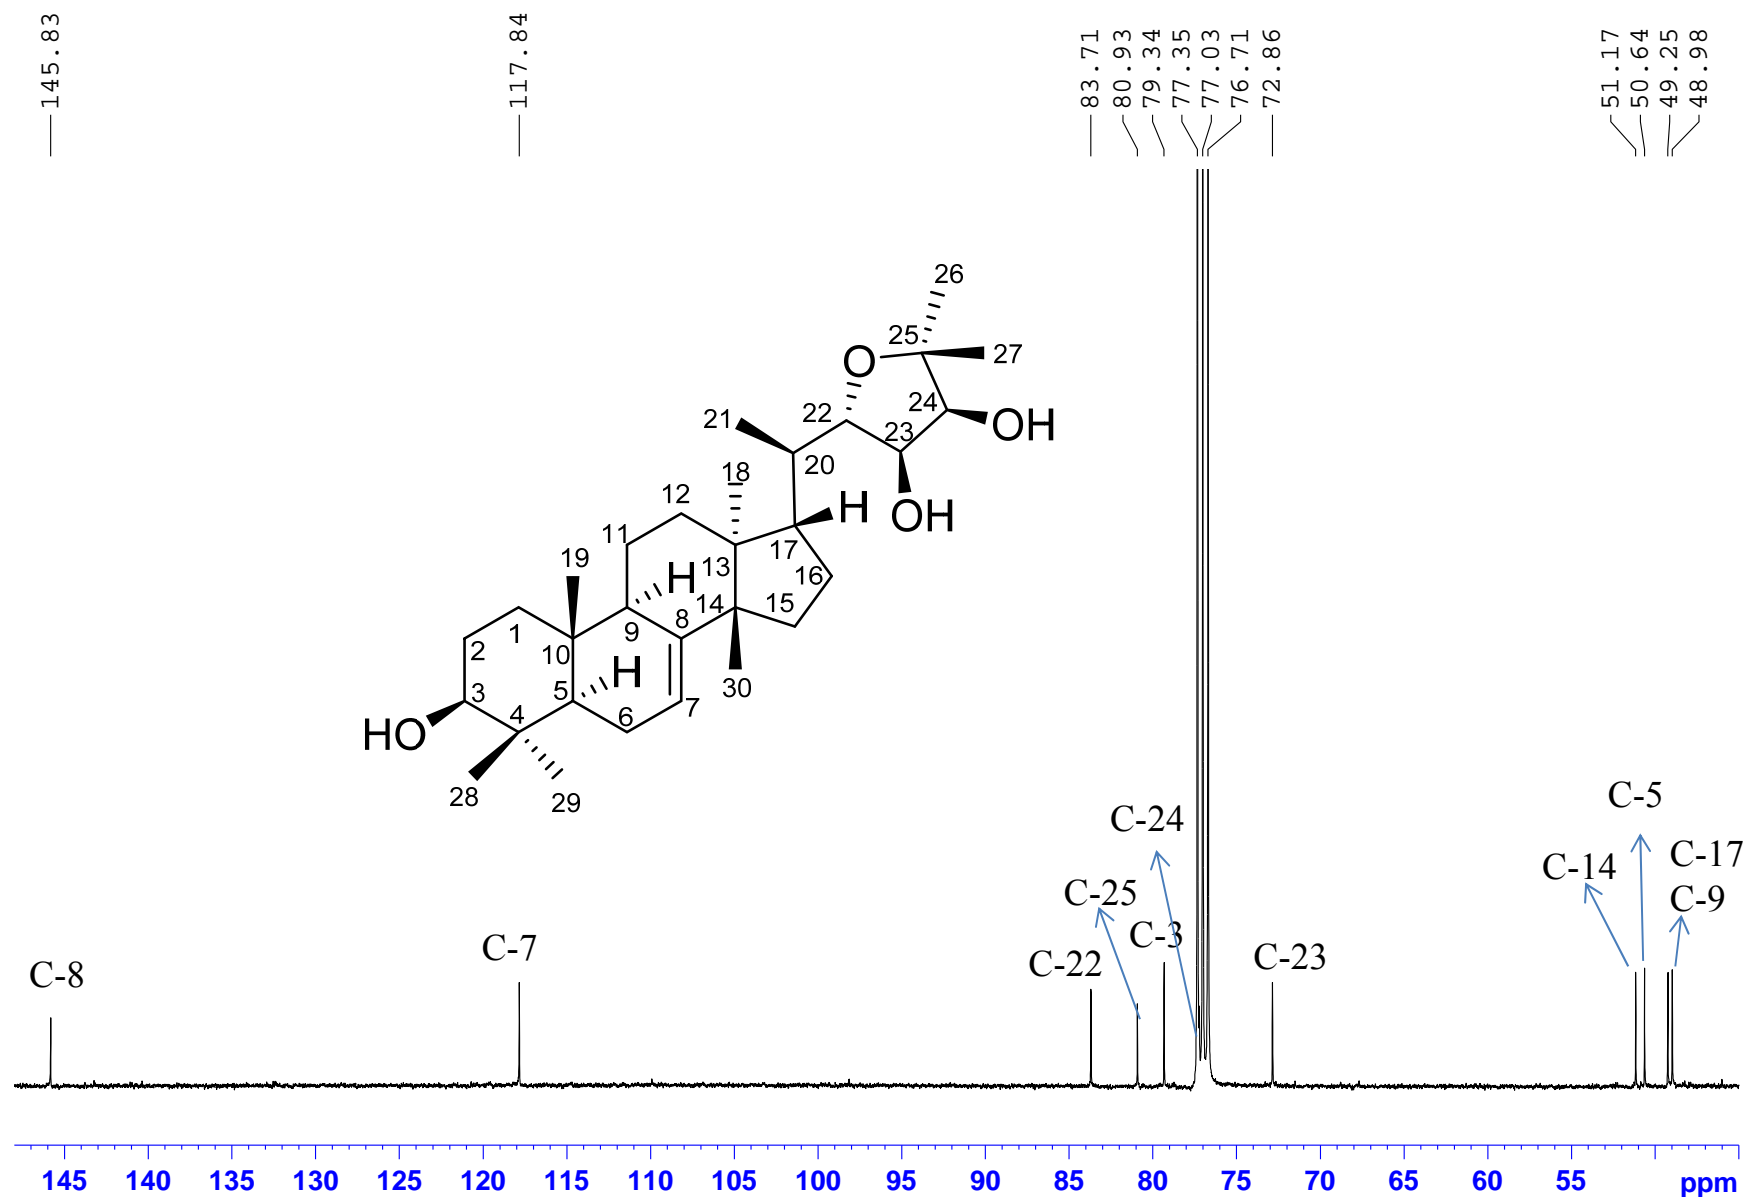

$^{13}\text{C}$  NMR (100 MHz) spectrum of compound **4** in  $\text{CDCl}_3$

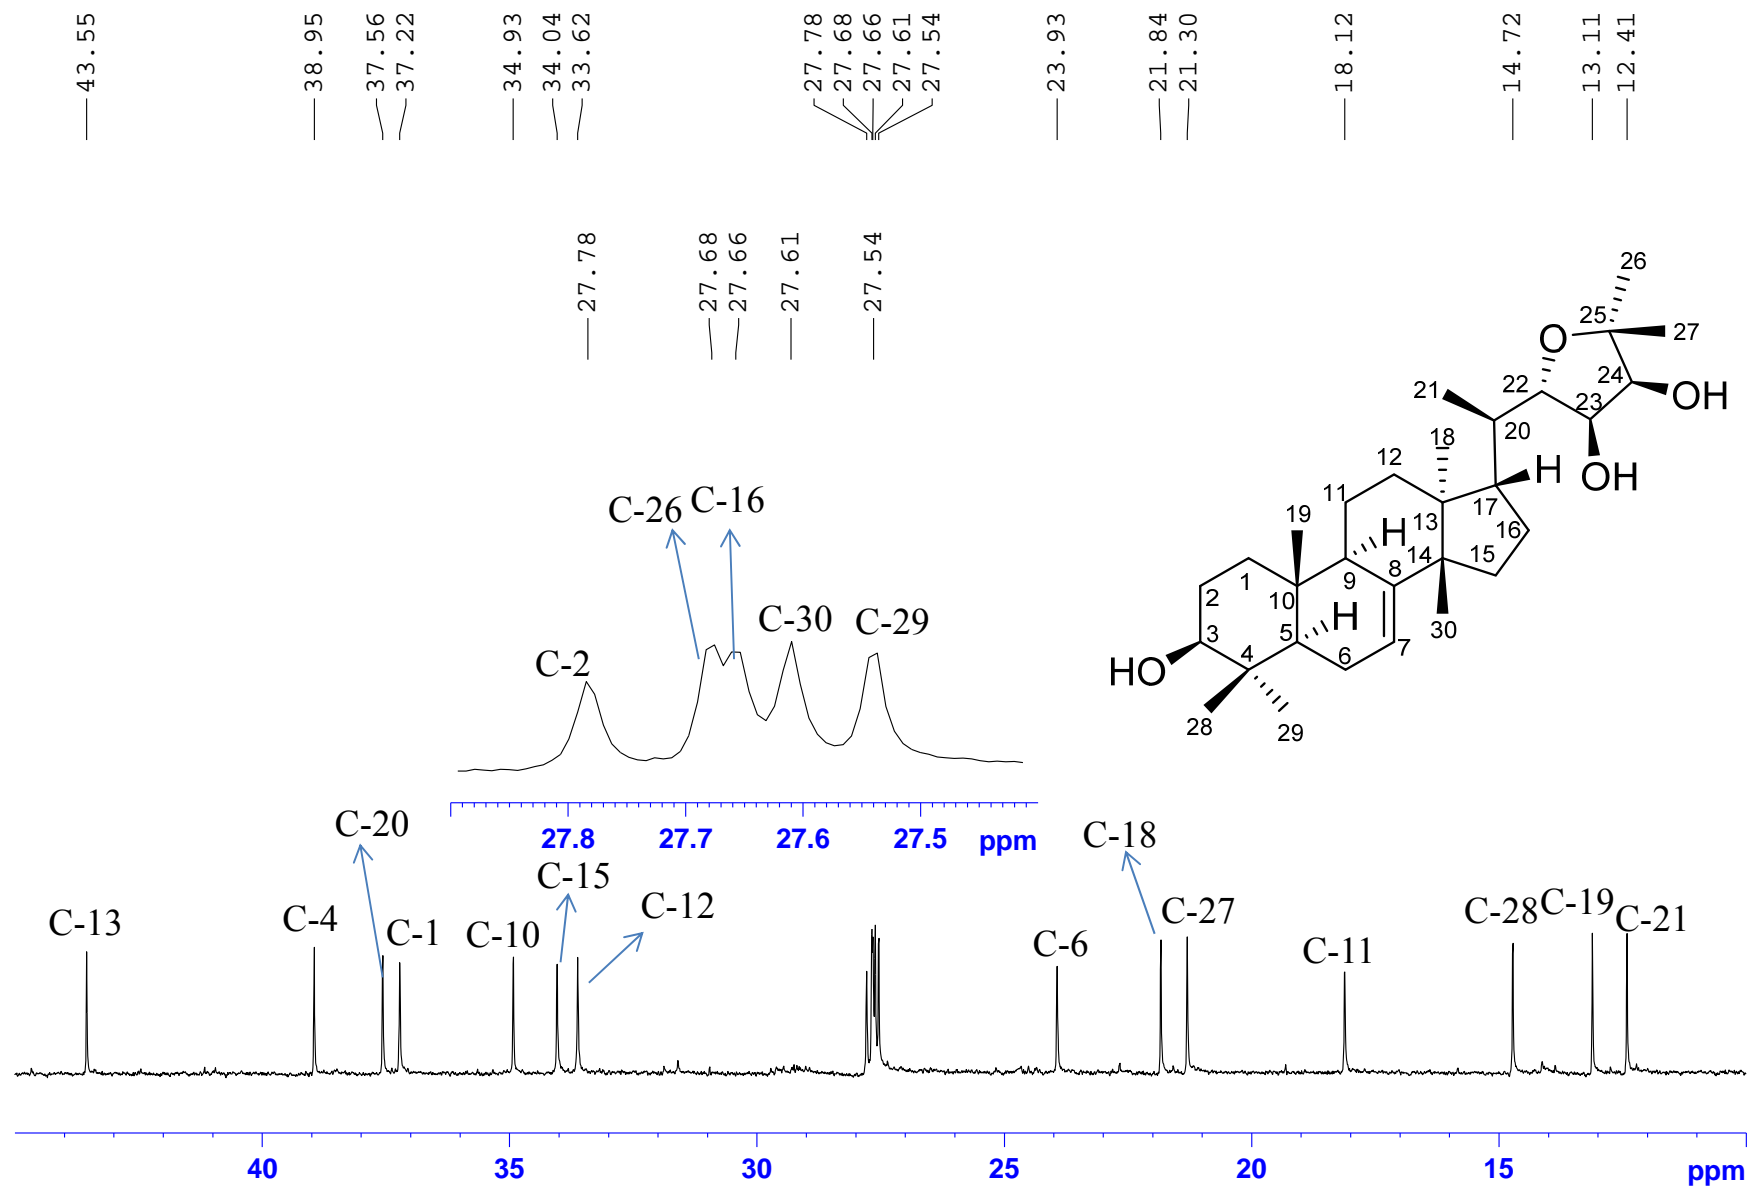



# DEPT 135 spectrum of compound **4** in CDCl<sub>3</sub>

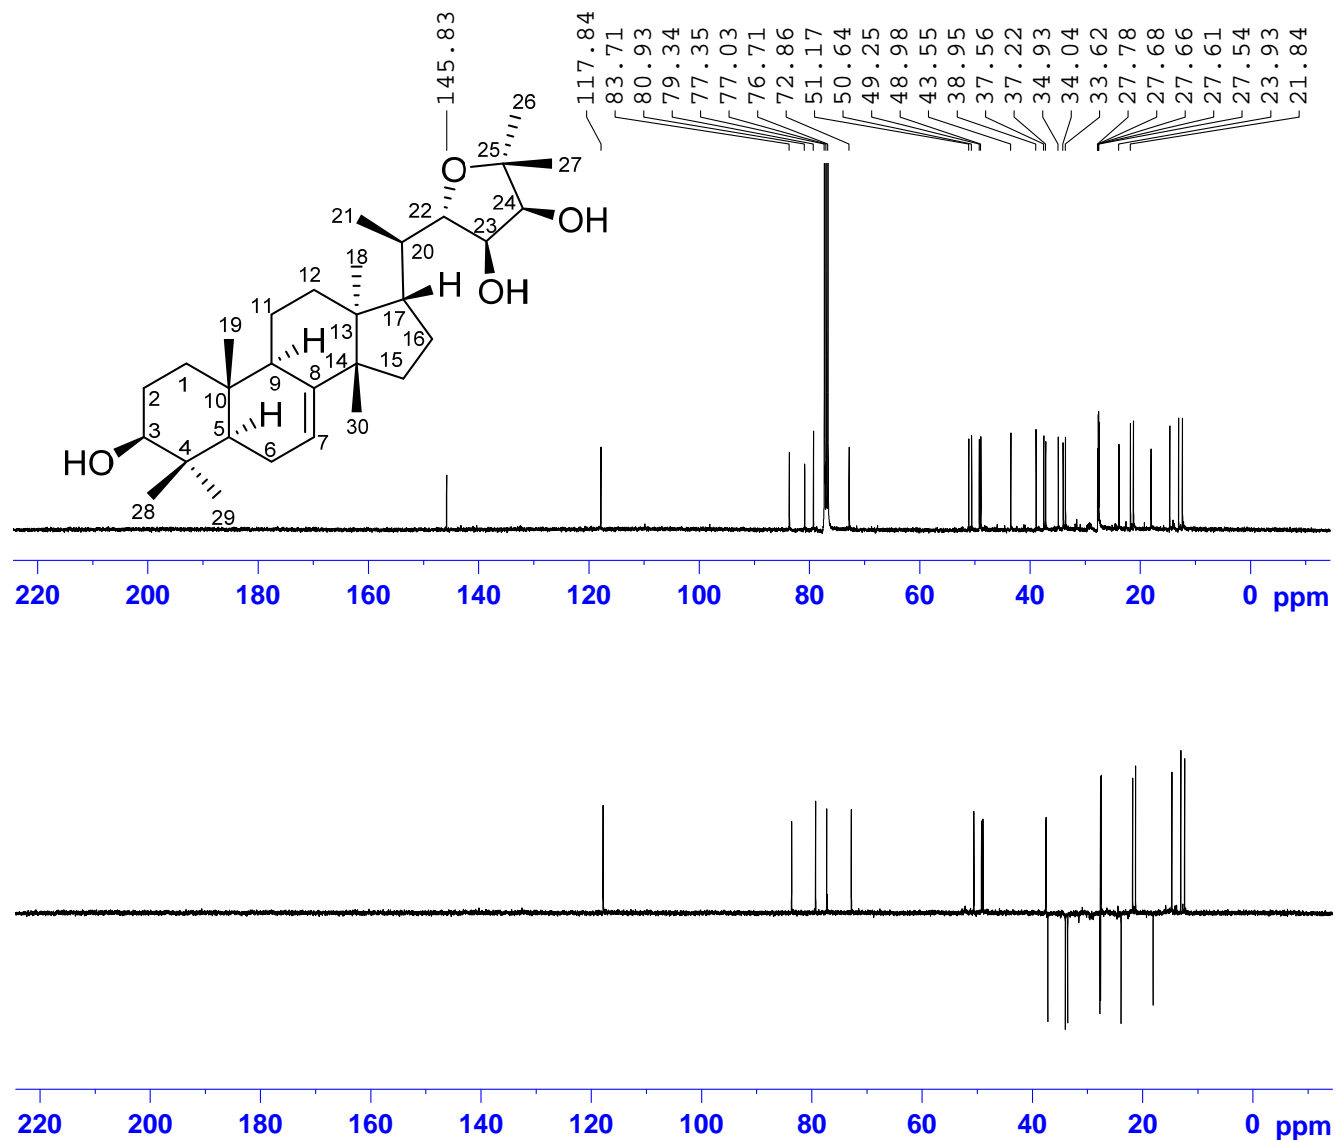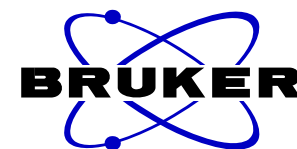

NAME LRX-XG-53-5  
 EXPNO 2  
 PROCNO 1  
 Date\_ 20171226  
 Time 19.20  
 INSTRUM spect  
 PROBHD 5 mm CPPBBO BB  
 PULPROG zgpg30  
 TD 65536  
 SOLVENT CDCl3  
 NS 1024  
 DS 4  
 SWH 24038.461 Hz  
 FIDRES 0.366798 Hz  
 AQ 1.3631988 sec  
 RG 73.92  
 DW 20.800 usec  
 DE 18.00 usec  
 TE 297.0 K  
 D1 2.00000000 sec  
 D11 0.03000000 sec  
 TD0 1

===== CHANNEL f1 =====  
 SFO1 100.6233324 MHz  
 NUC1 13C  
 P1 10.00 usec  
 SI 32768  
 SF 100.6127692 MHz  
 WDW EM  
 SSB 0  
 LB 1.00 Hz  
 GB 0  
 PC 1.40

# DEPT 135 spectrum of compound **4** in CDCl<sub>3</sub>

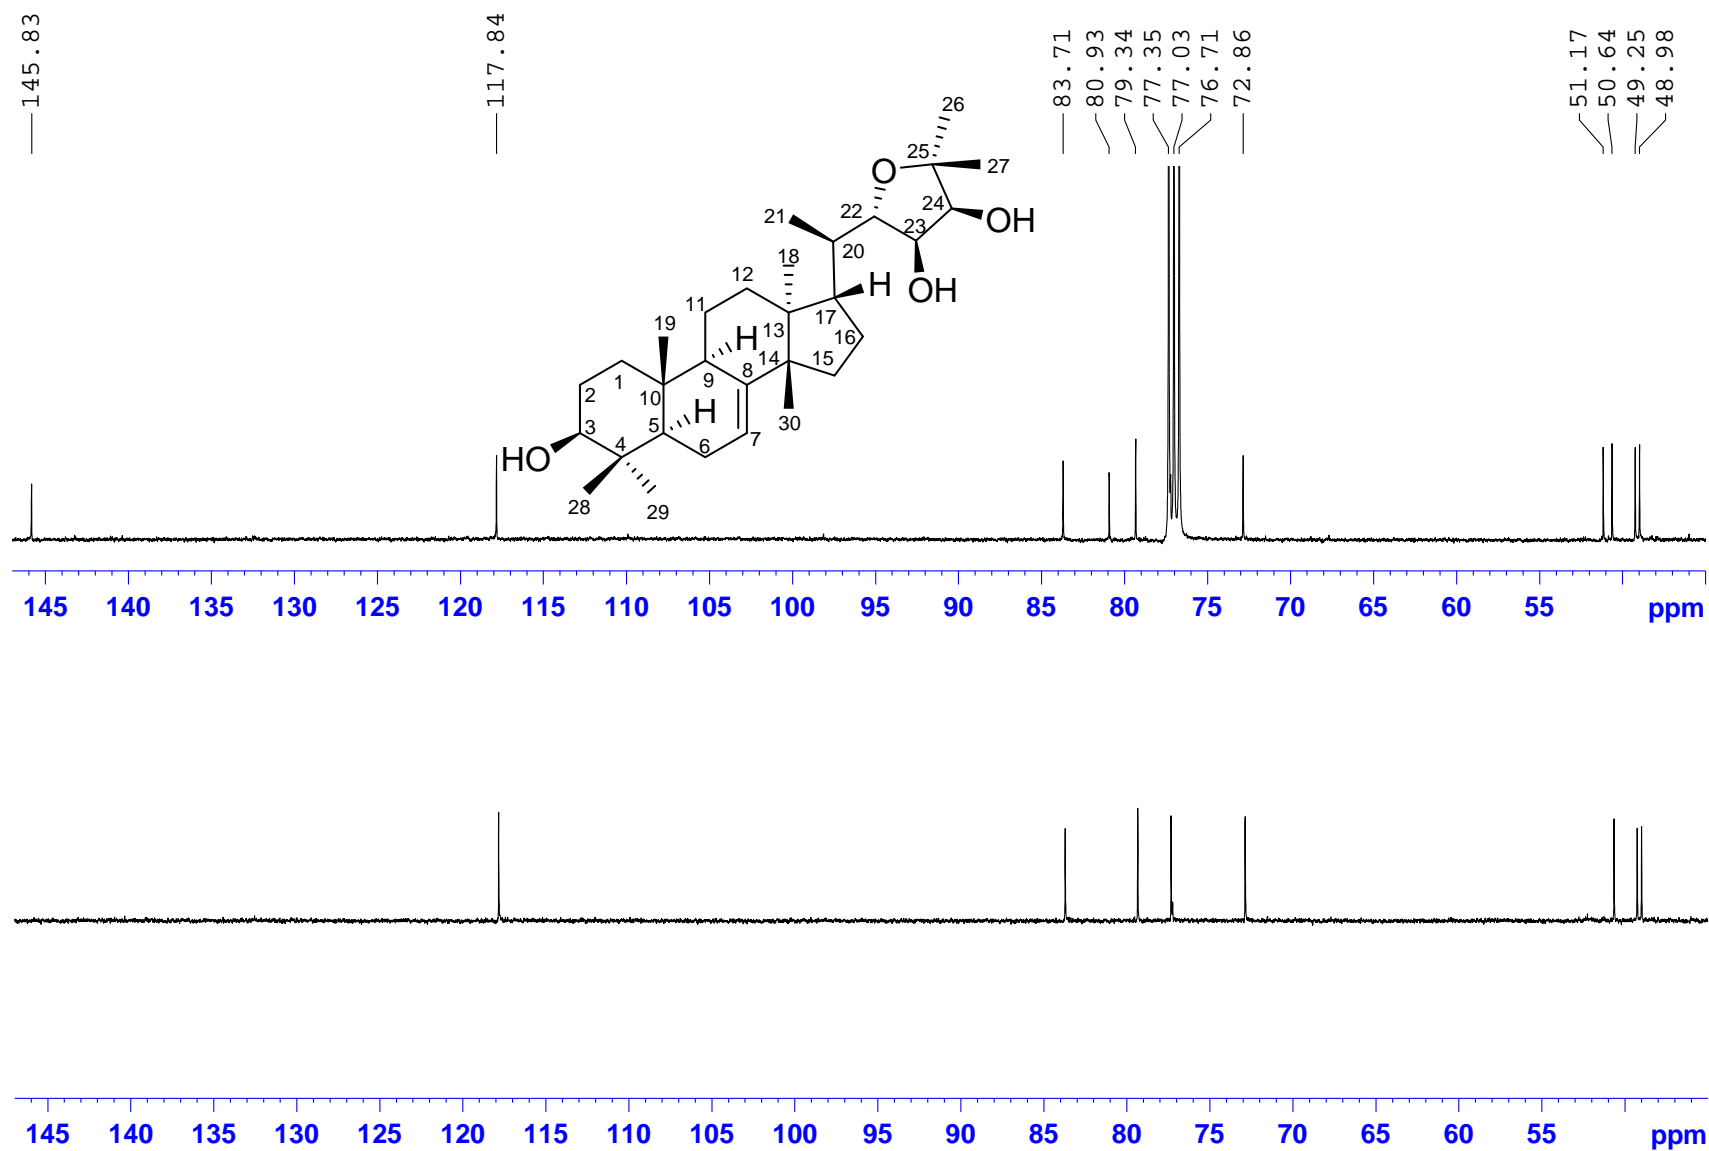

# DEPT 135 spectrum of compound **4** in CDCl<sub>3</sub>

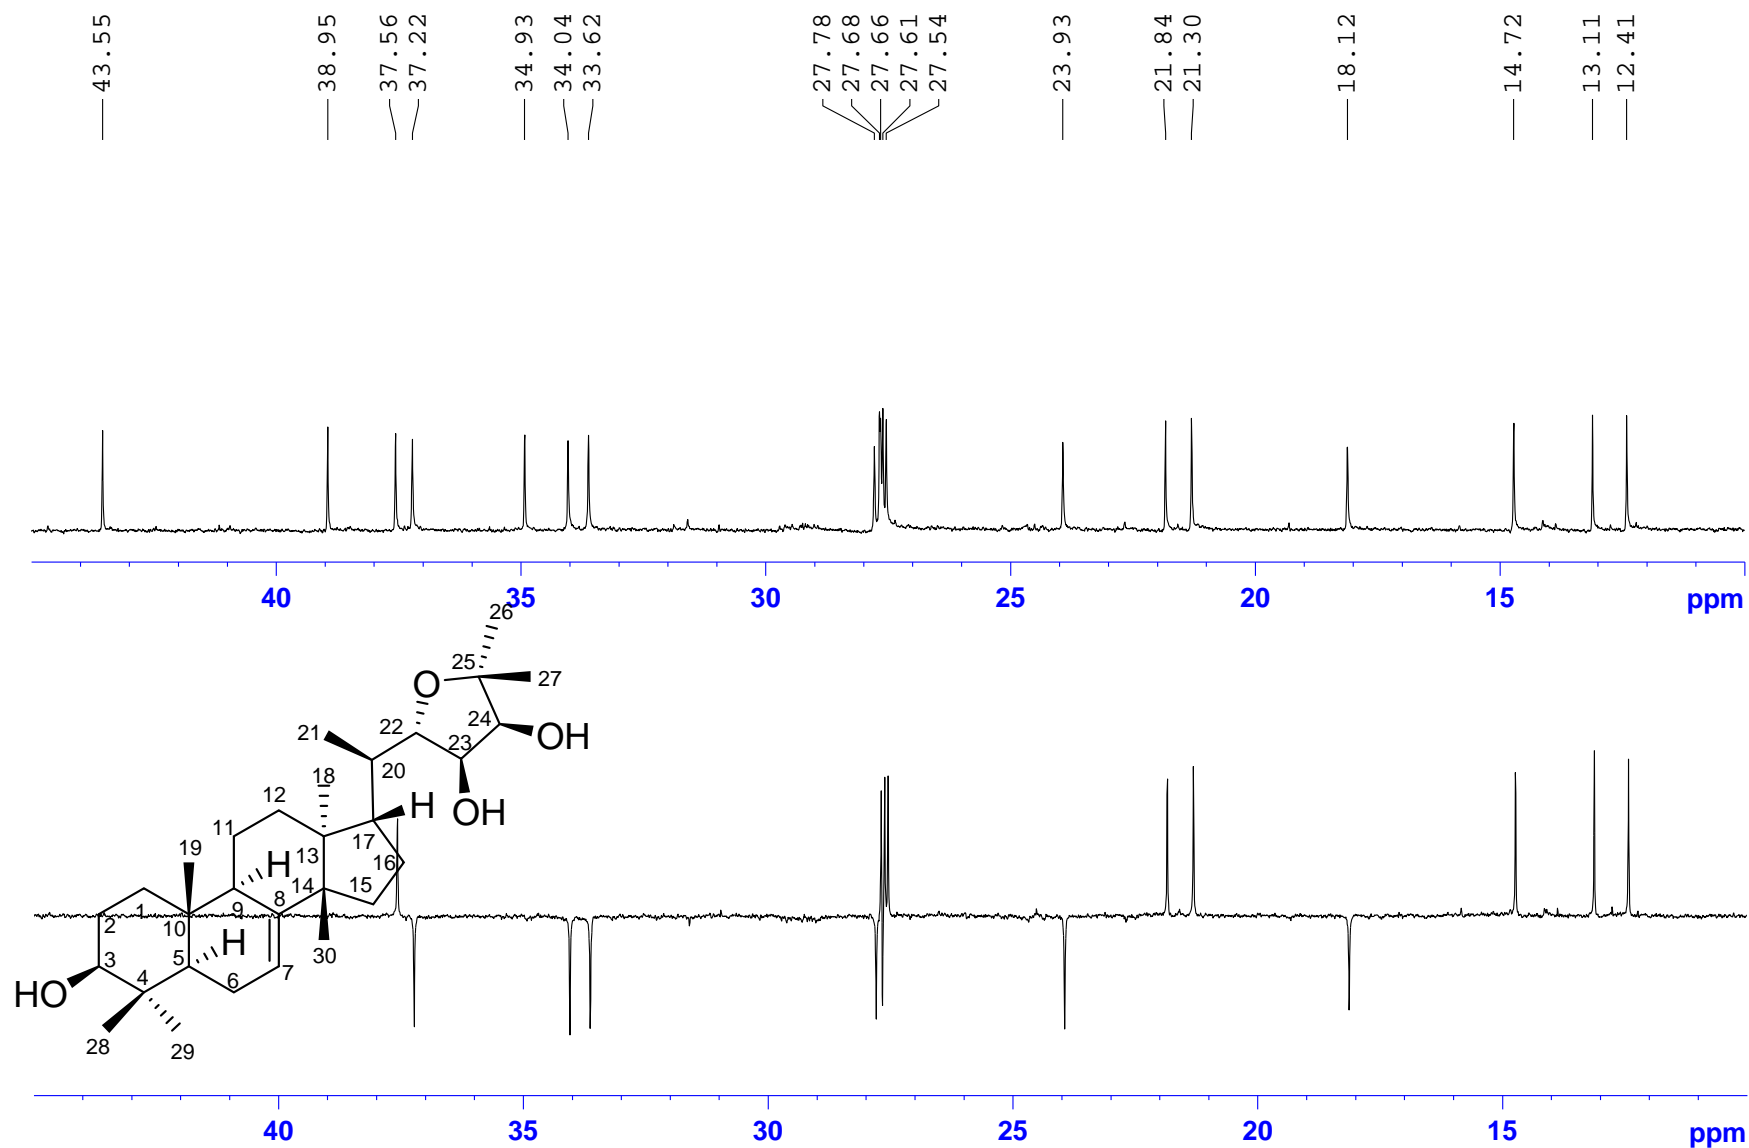

DEPT 135 spectrum of compound **4** in CDCl<sub>3</sub>

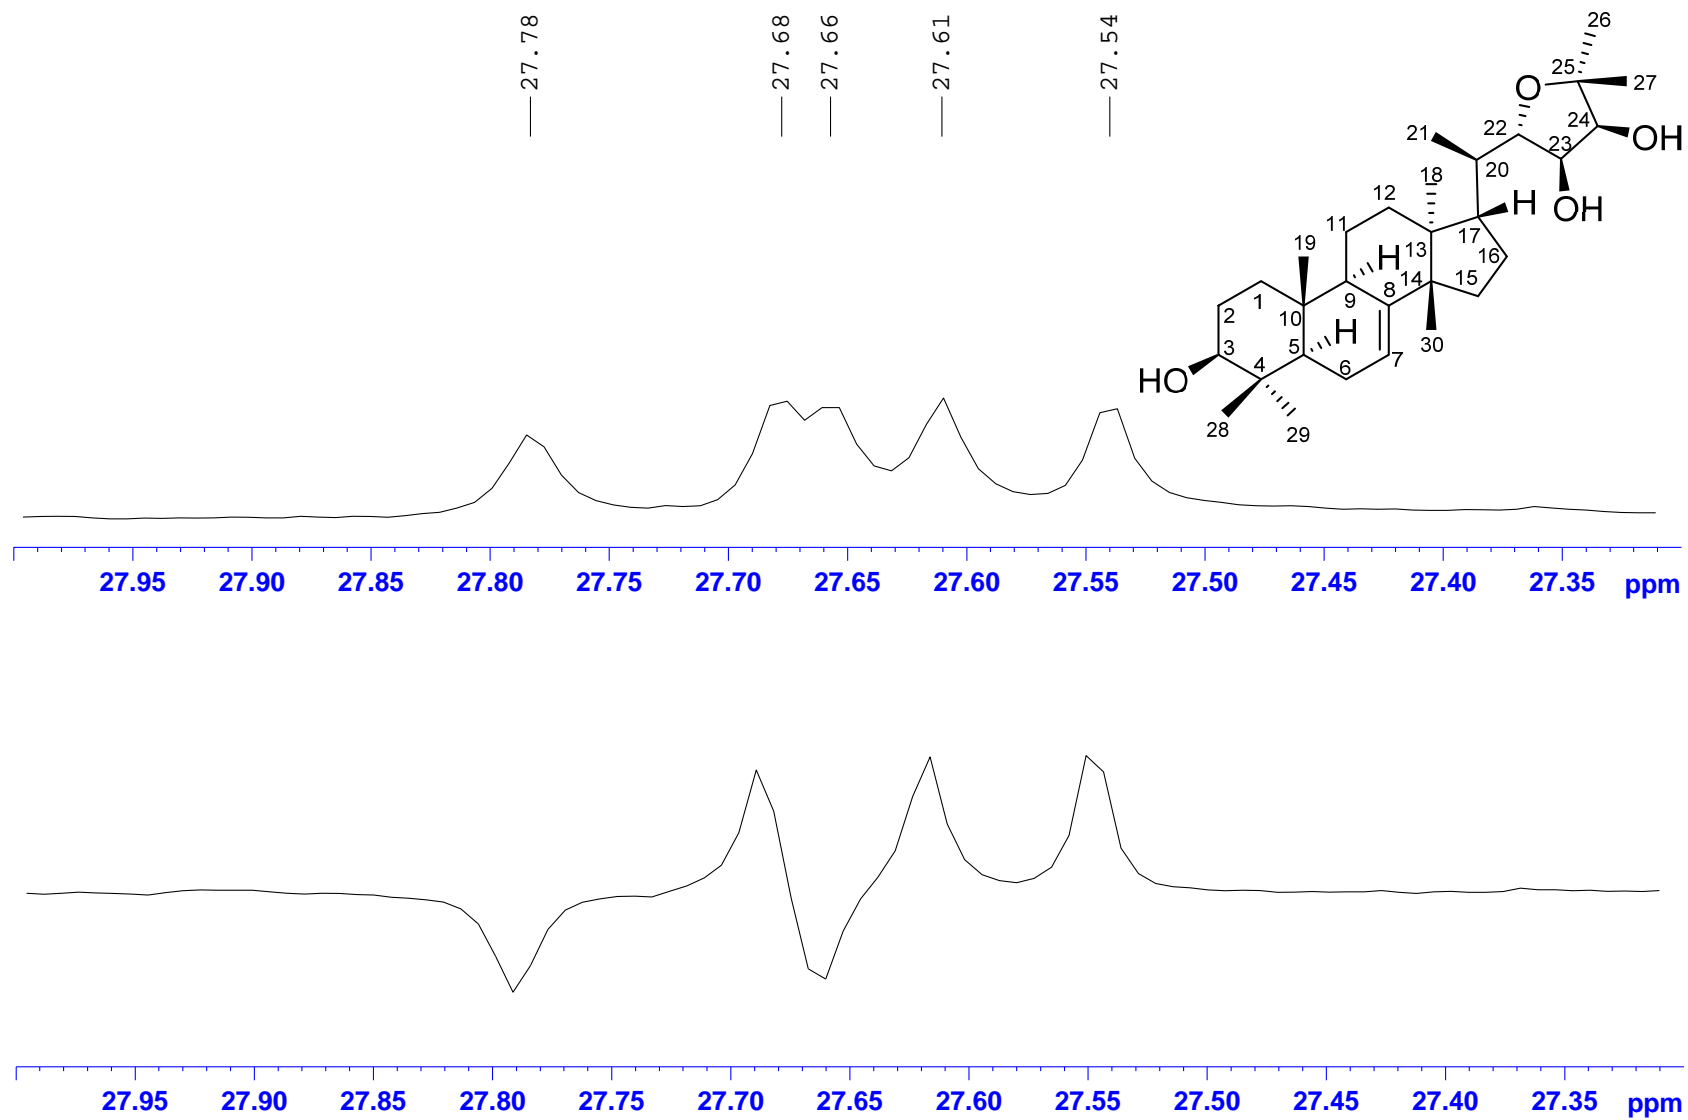

$^1\text{H}$ - $^1\text{H}$  COSY (400 MHz) spectrum of compound **4** in  $\text{CDCl}_3$

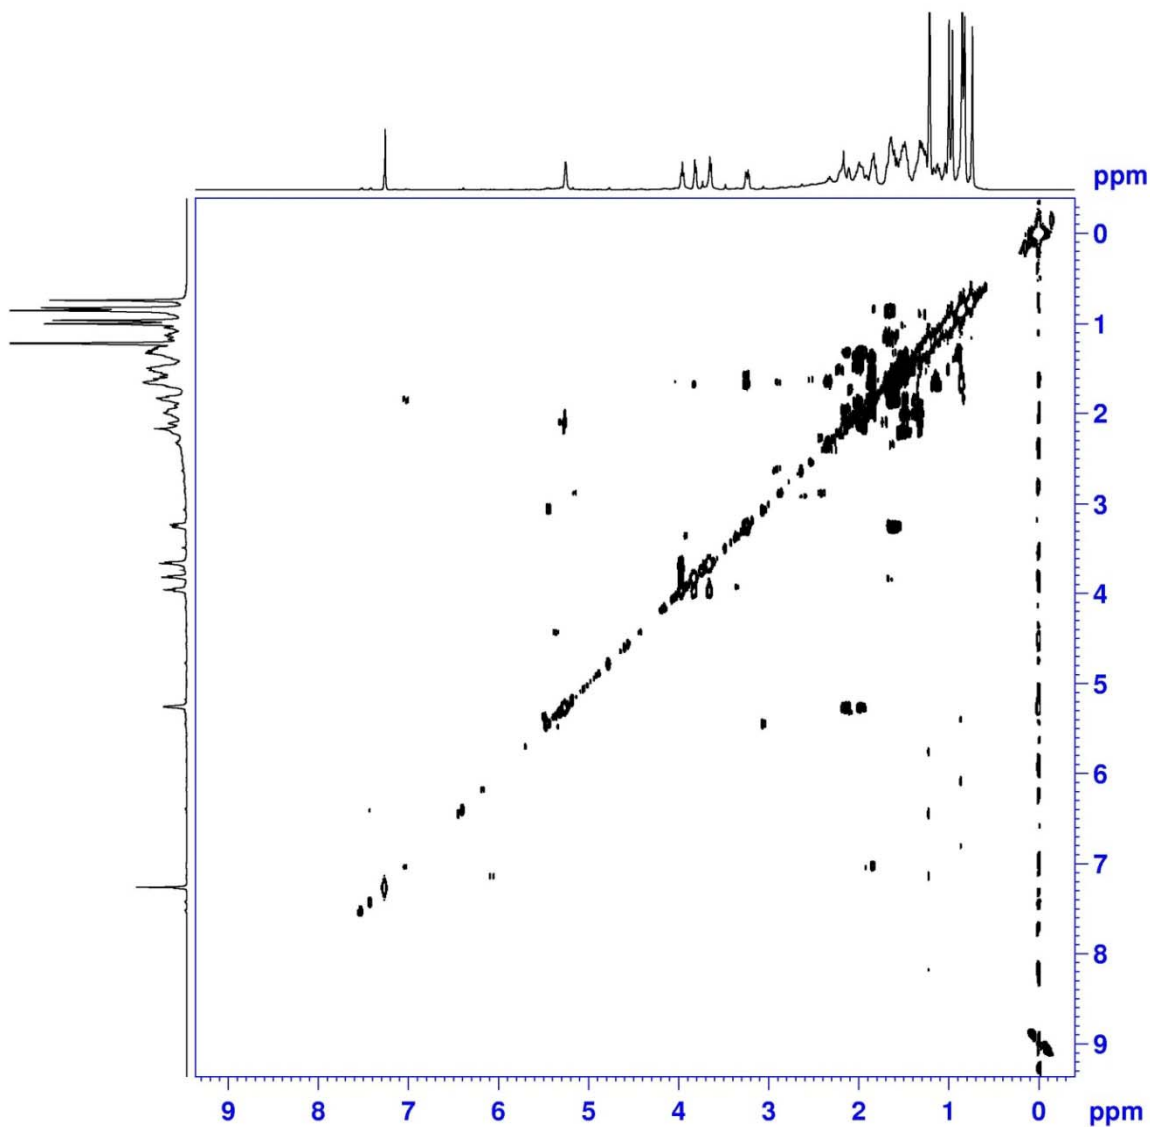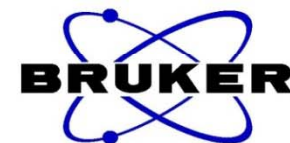

```

NAME      LRX-XG-53-5
EXPNO     4
PROCNO    1
Date_     20180112
Time      22.45
INSTRUM   spect
PROBHD    5 mm CPPBBO BB
PULPROG   cosygpppgf
TD        2048
SOLVENT   CDCl3
NS        8
DS        8
SWH       3906.250 Hz
FIDRES    1.907349 Hz
AQ        0.2621940 sec
RG        91.64
DW        128.000 usec
DE        10.00 usec
TE        297.0 K
D0        0.00000300 sec
D1        1.89678097 sec
D11       0.03000000 sec
D12       0.00002000 sec
D13       0.00000400 sec
D16       0.00020000 sec
IN0       0.00025600 sec
  
```

```

===== CHANNEL f1 =====
SFO1    400.1318006 MHz
NUC1     1H
P0       11.50 usec
P1       11.50 usec
P17      2500.00 usec
ND0       1
TD       128
SFO1    400.1318 MHz
FIDRES   30.517578 Hz
SW        9.762 ppm
FnMODE    QF
SI       1024
SF    400.1300068 MHz
WDW      QSINE
SSB       0
LB        0.00 Hz
GB        0
PC        1.40
SI       1024
MC2      QF
SF    400.1300075 MHz
WDW      QSINE
SSB       0
LB        0.00 Hz
GB        0
  
```

$^1\text{H}$ - $^1\text{H}$  COSY (400 MHz) spectrum of compound **4** in  $\text{CDCl}_3$

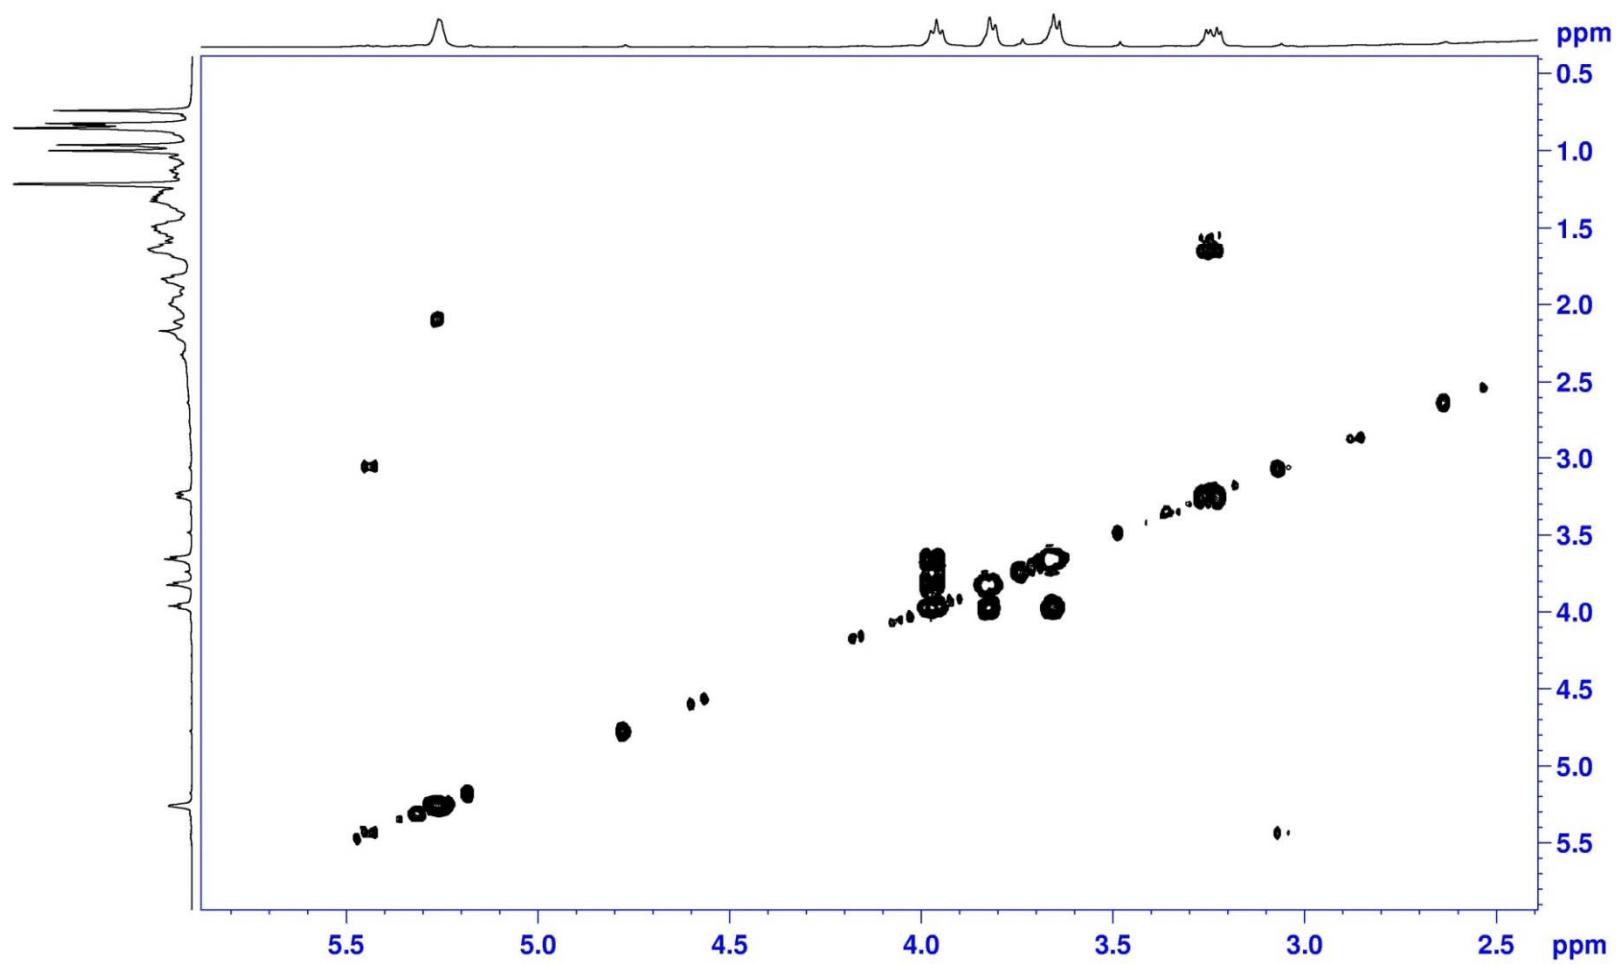

$^1\text{H}$ - $^1\text{H}$  COSY (400 MHz) spectrum of compound **4** in  $\text{CDCl}_3$

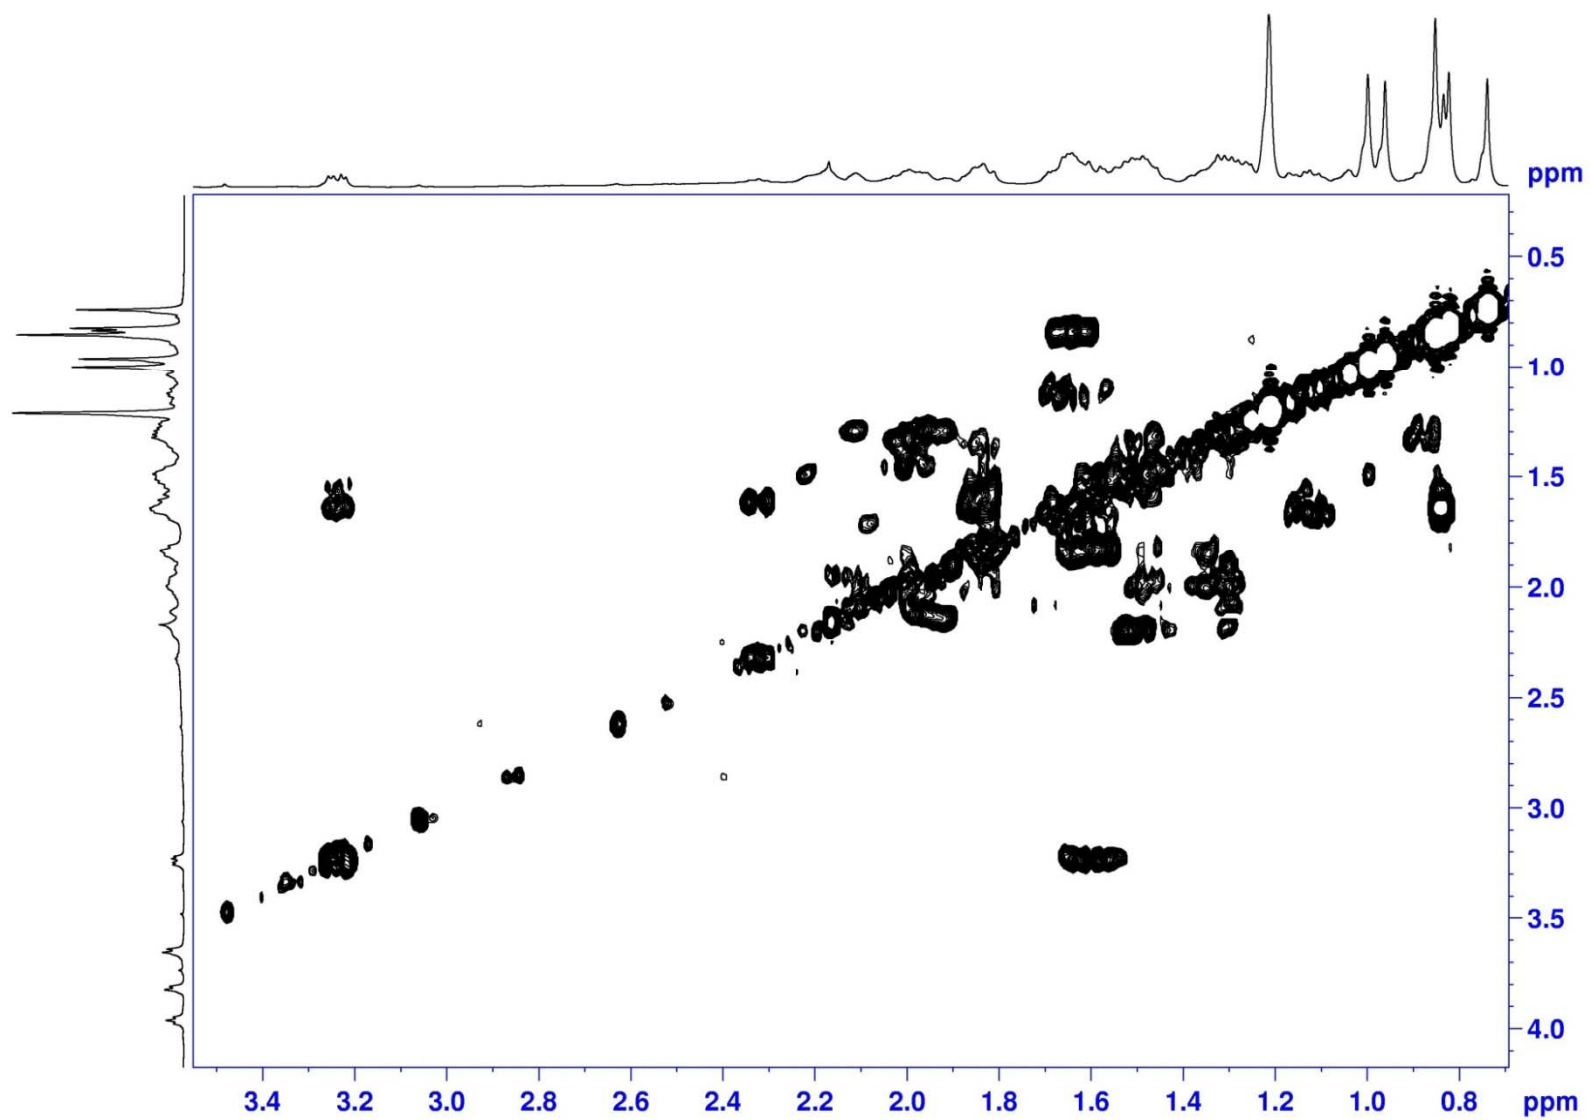

# HSQC (400 MHz) spectrum of compound **4** in CDCl<sub>3</sub>

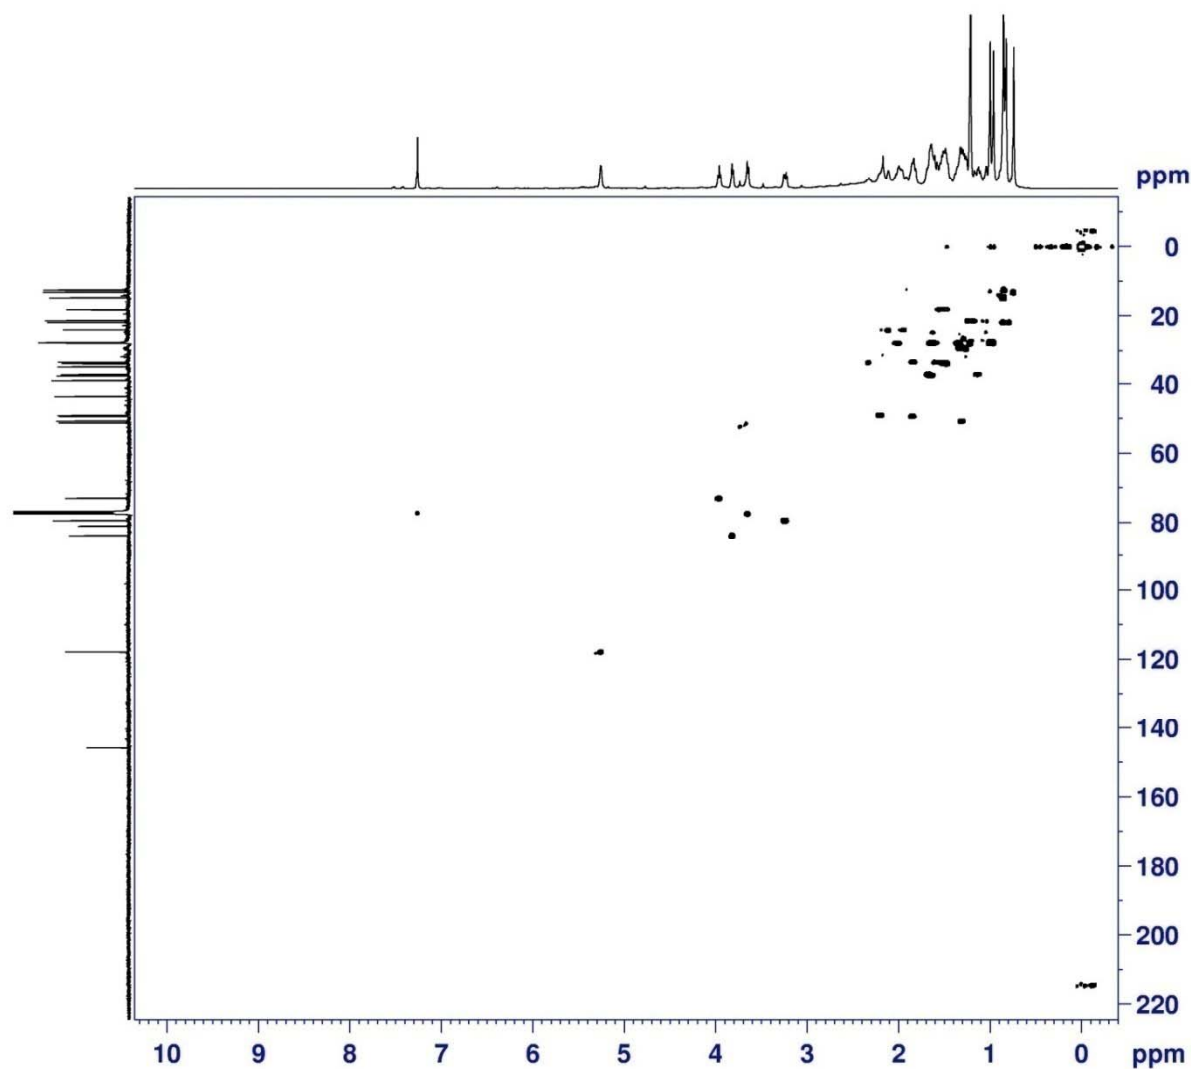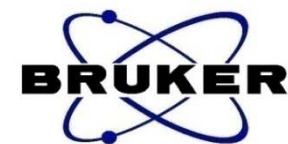

```

NAME          LRX-XG-53-5
EXPNO          5
PROCNO         1
Date_          20180112
Time           23.24
INSTRUM        spect
PROBHD         5 mm CPPBBO BB
PULPROG        hsqcetgpsi2
TD             1024
SOLVENT        CDCl3
NS             16
DS             16
SWH            4302.926 Hz
FIDRES         4.202076 Hz
AQ             0.1190388 sec
RG             208.5
DW             116.200 usec
DE             10.00 usec
TE             297.0 K
CNST2          145.0000000
D0             0.00000300 sec
D1             1.46497905 sec
D4             0.00172414 sec
D11            0.03000000 sec
D16            0.00020000 sec
D24            0.00086207 sec
IN0            0.00002080 sec
ZGPTNS
  
```

```

===== CHANNEL f1 =====
SFO1          400.1320007 MHz
NUC1           1H
P1             11.50 usec
P2             23.00 usec
P28            0.00 usec
ND0            2
TD             256
SFO1          100.6233 MHz
FIDRES         93.900238 Hz
SW             238.896 ppm
FnMODE        Echo-Antiecho
SI             1024
SF             400.1300095 MHz
WDW            QSINE
SSB            2
LB             0.00 Hz
GB             0
PC             1.40
SI             1024
MC2           echo-antiecho
SF             100.6127551 MHz
WDW            QSINE
SSB            2
  
```



HSQC (400 MHz) spectrum of compound **4** in CDCl<sub>3</sub>

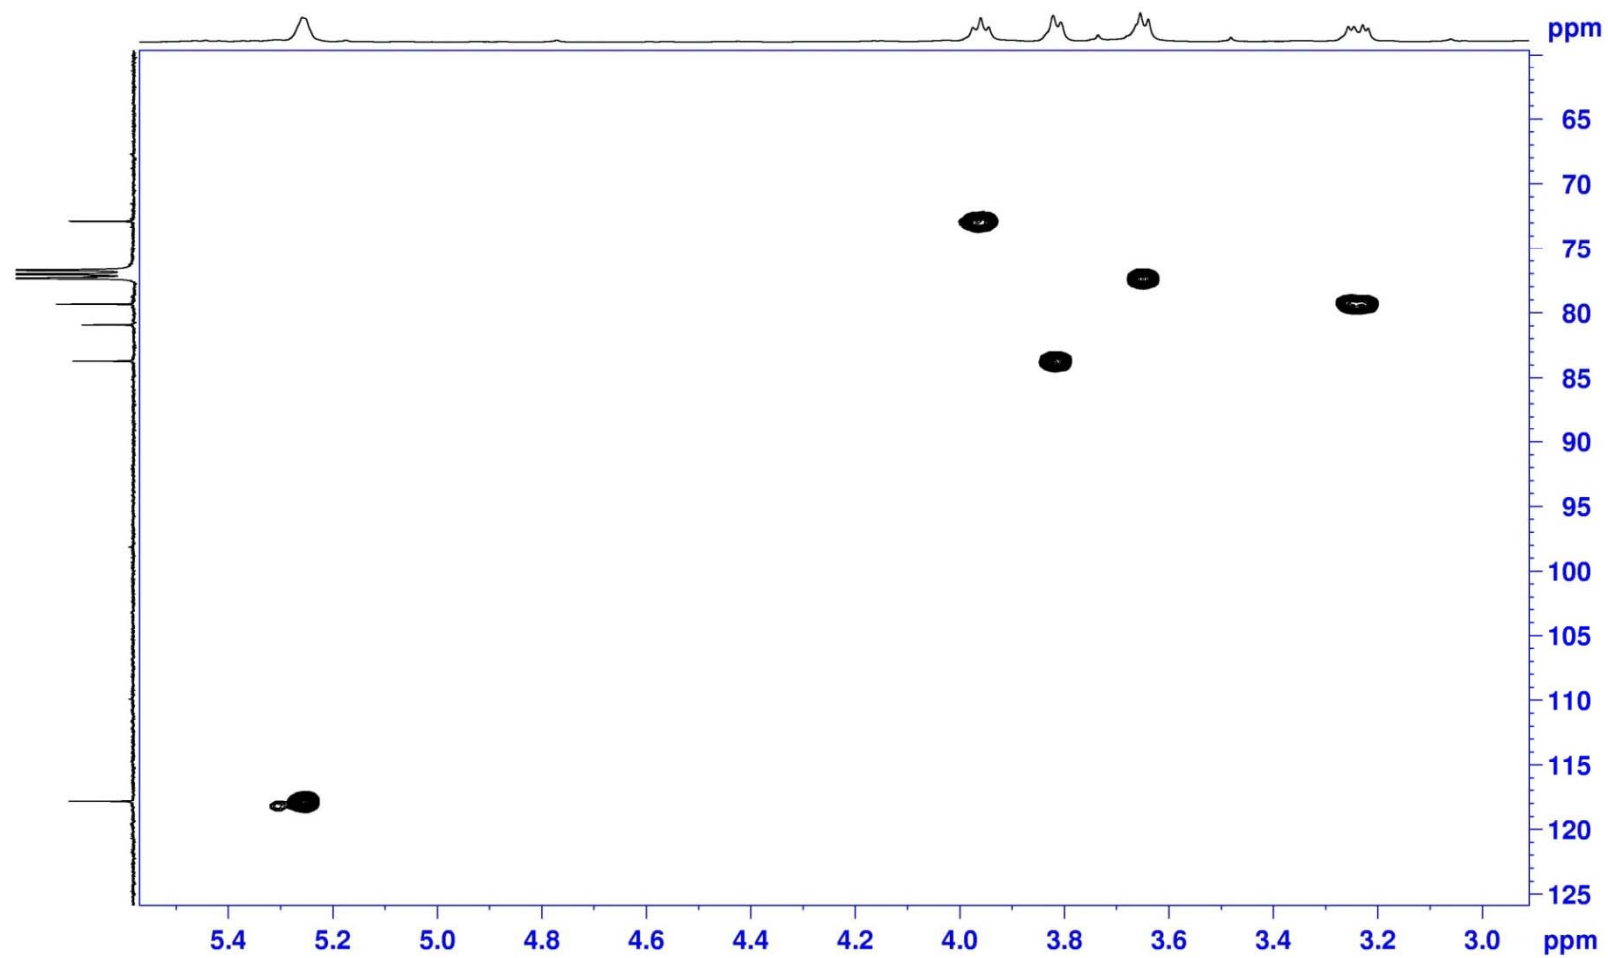

HSQC (400 MHz) spectrum of compound **4** in CDCl<sub>3</sub>

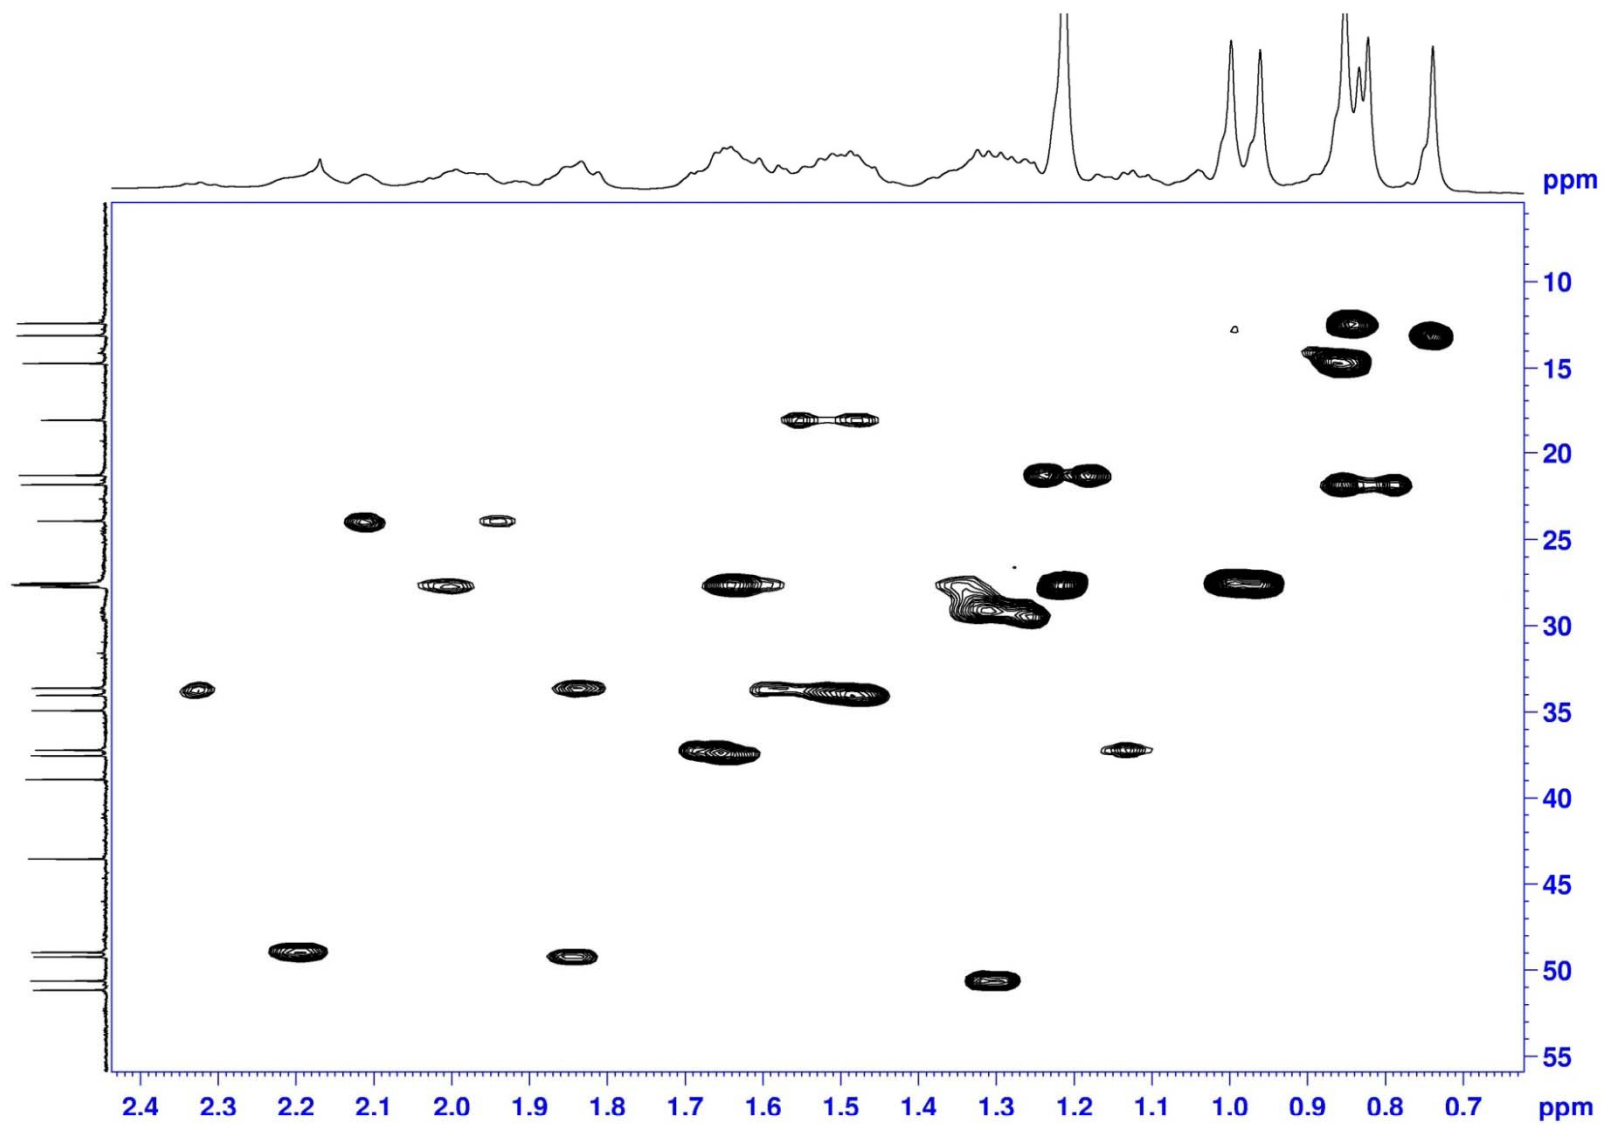

# HMBC (400 MHz) spectrum of compound **4** in CDCl<sub>3</sub>

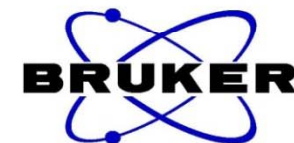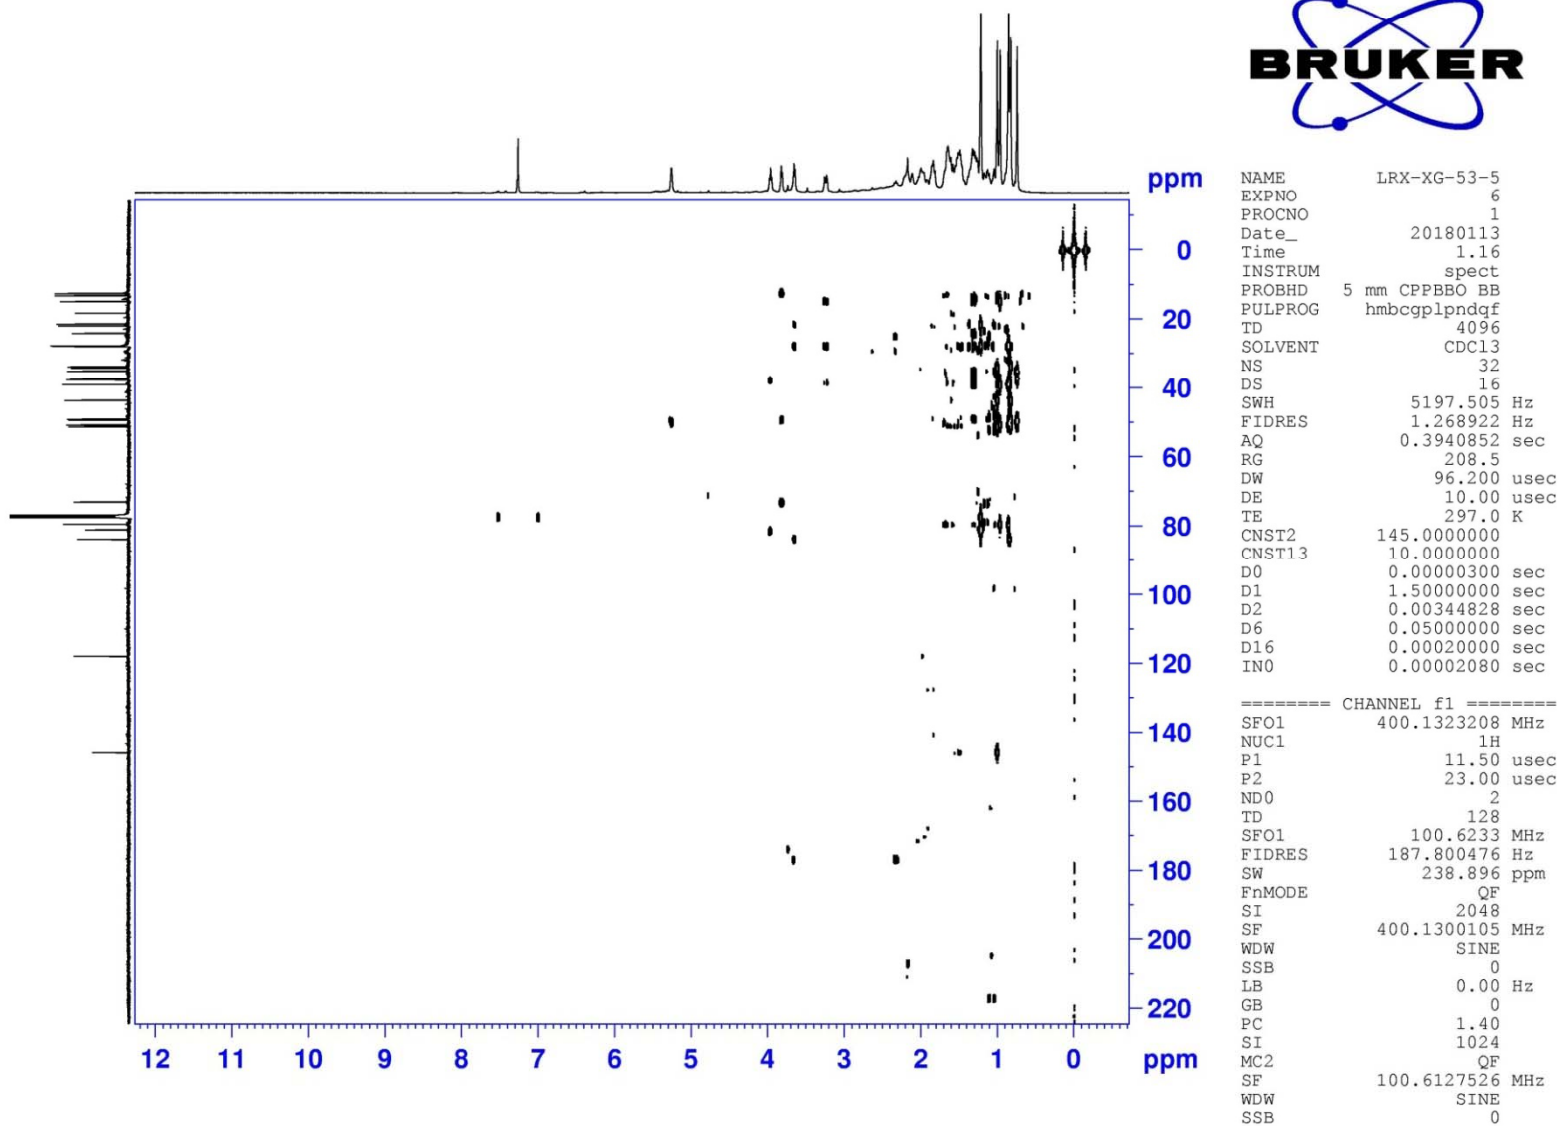

HMBC (400 MHz) spectrum of compound **4** in CDCl<sub>3</sub>

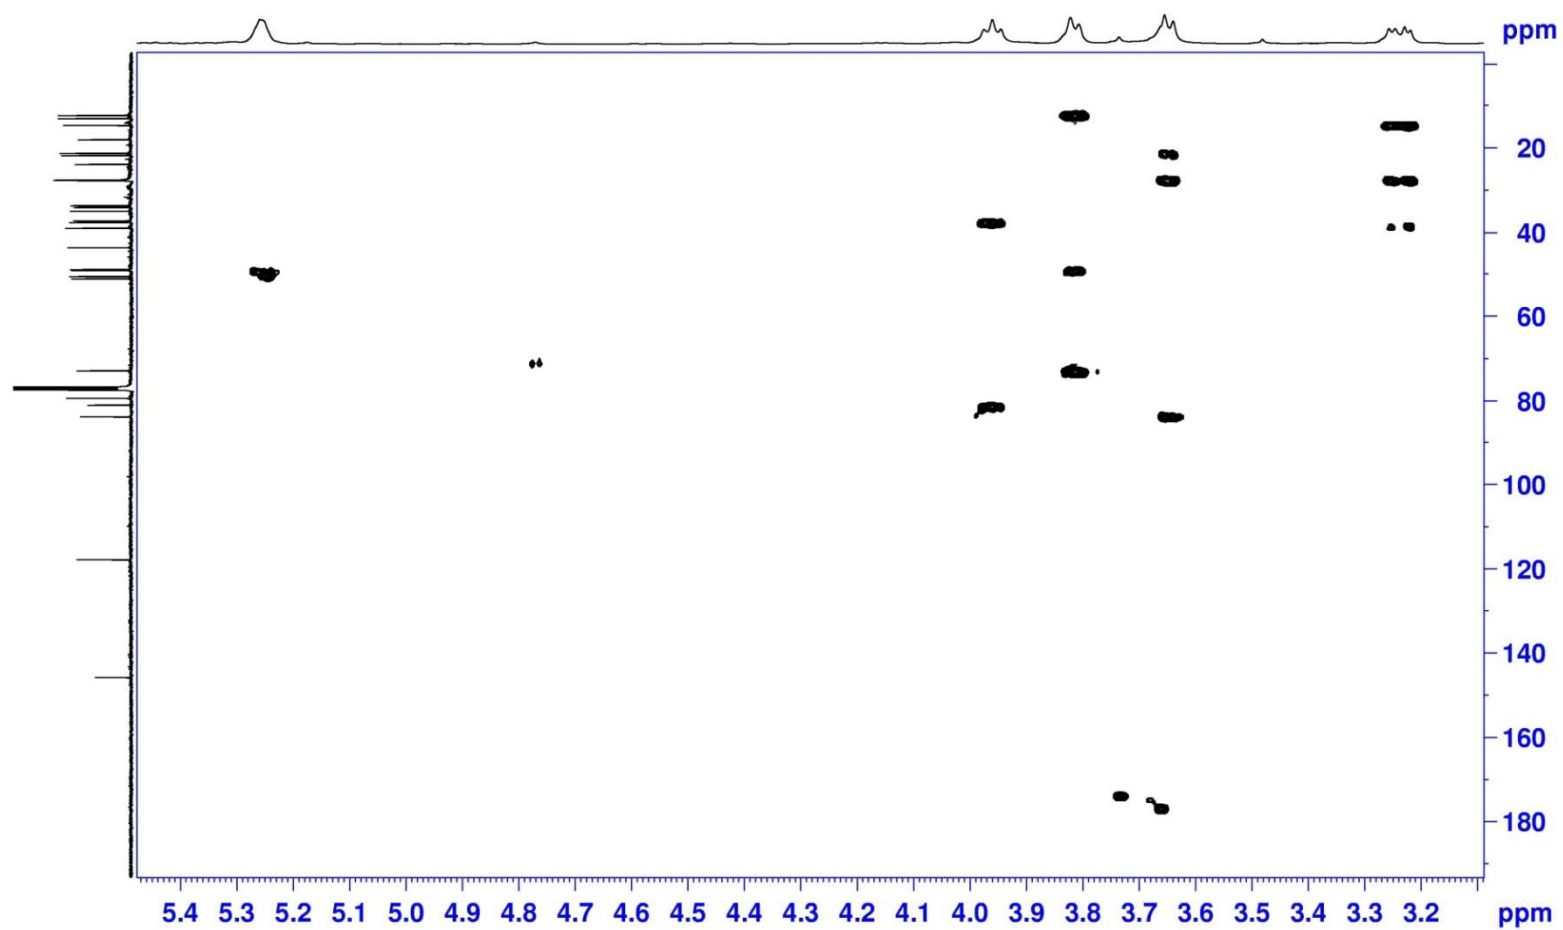

HMBC (400 MHz) spectrum of compound **4** in  $\text{CDCl}_3$

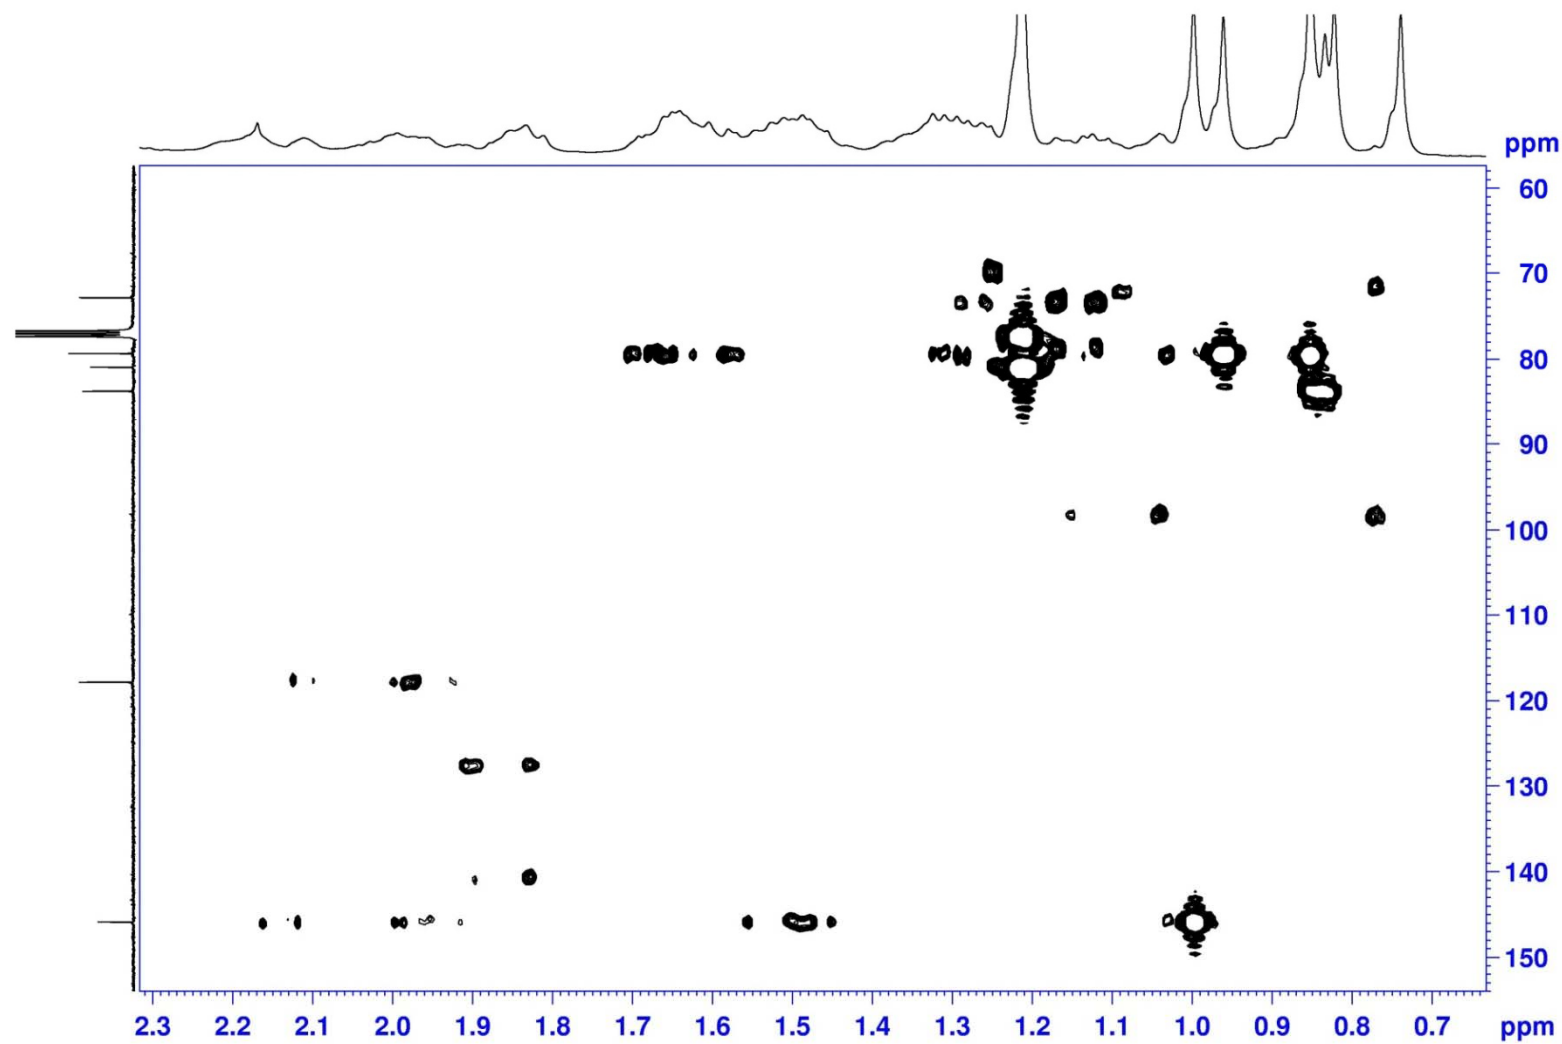

HMBC (400 MHz) spectrum of compound **4** in CDCl<sub>3</sub>

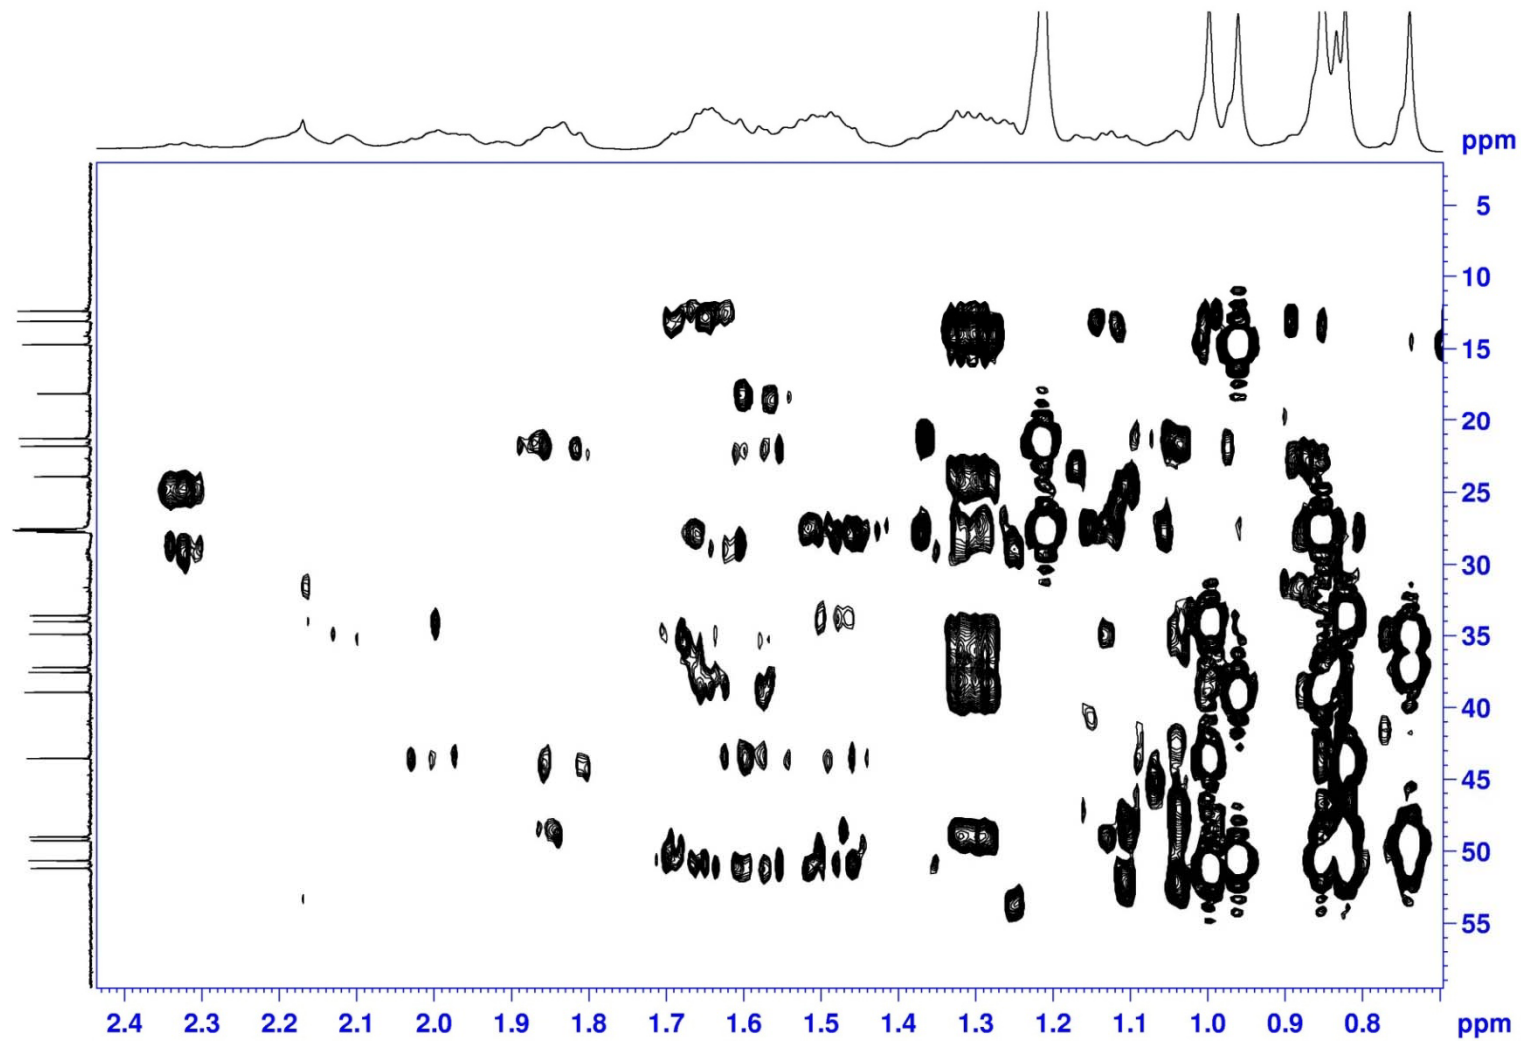

HMBC (400 MHz) spectrum of compound **4** in  $\text{CDCl}_3$

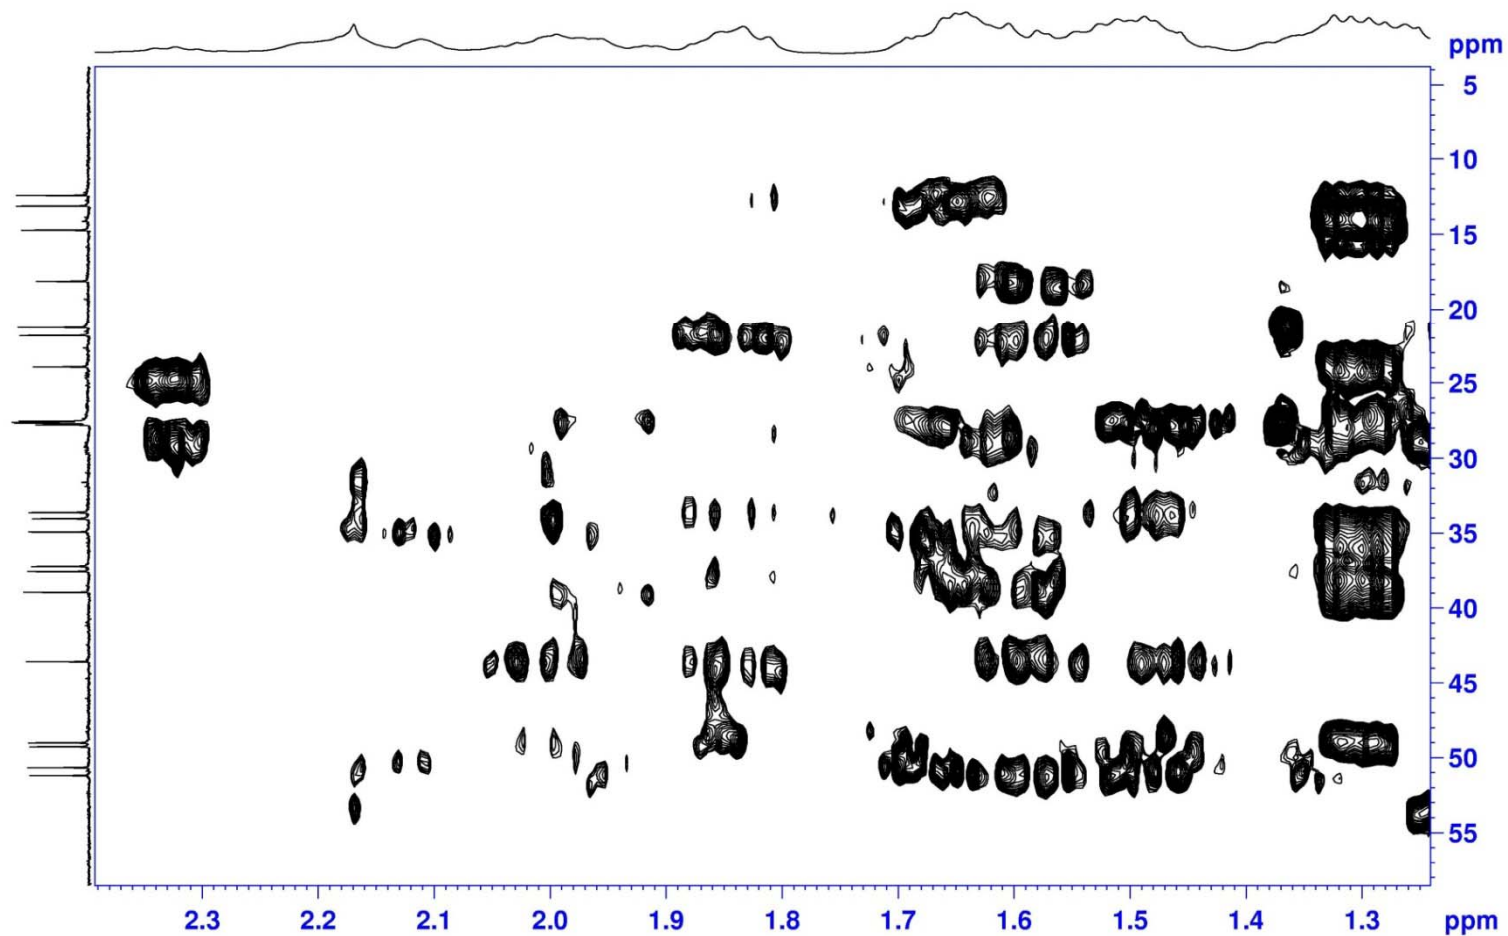

HMBC (400 MHz) spectrum of compound **4** in CDCl<sub>3</sub>

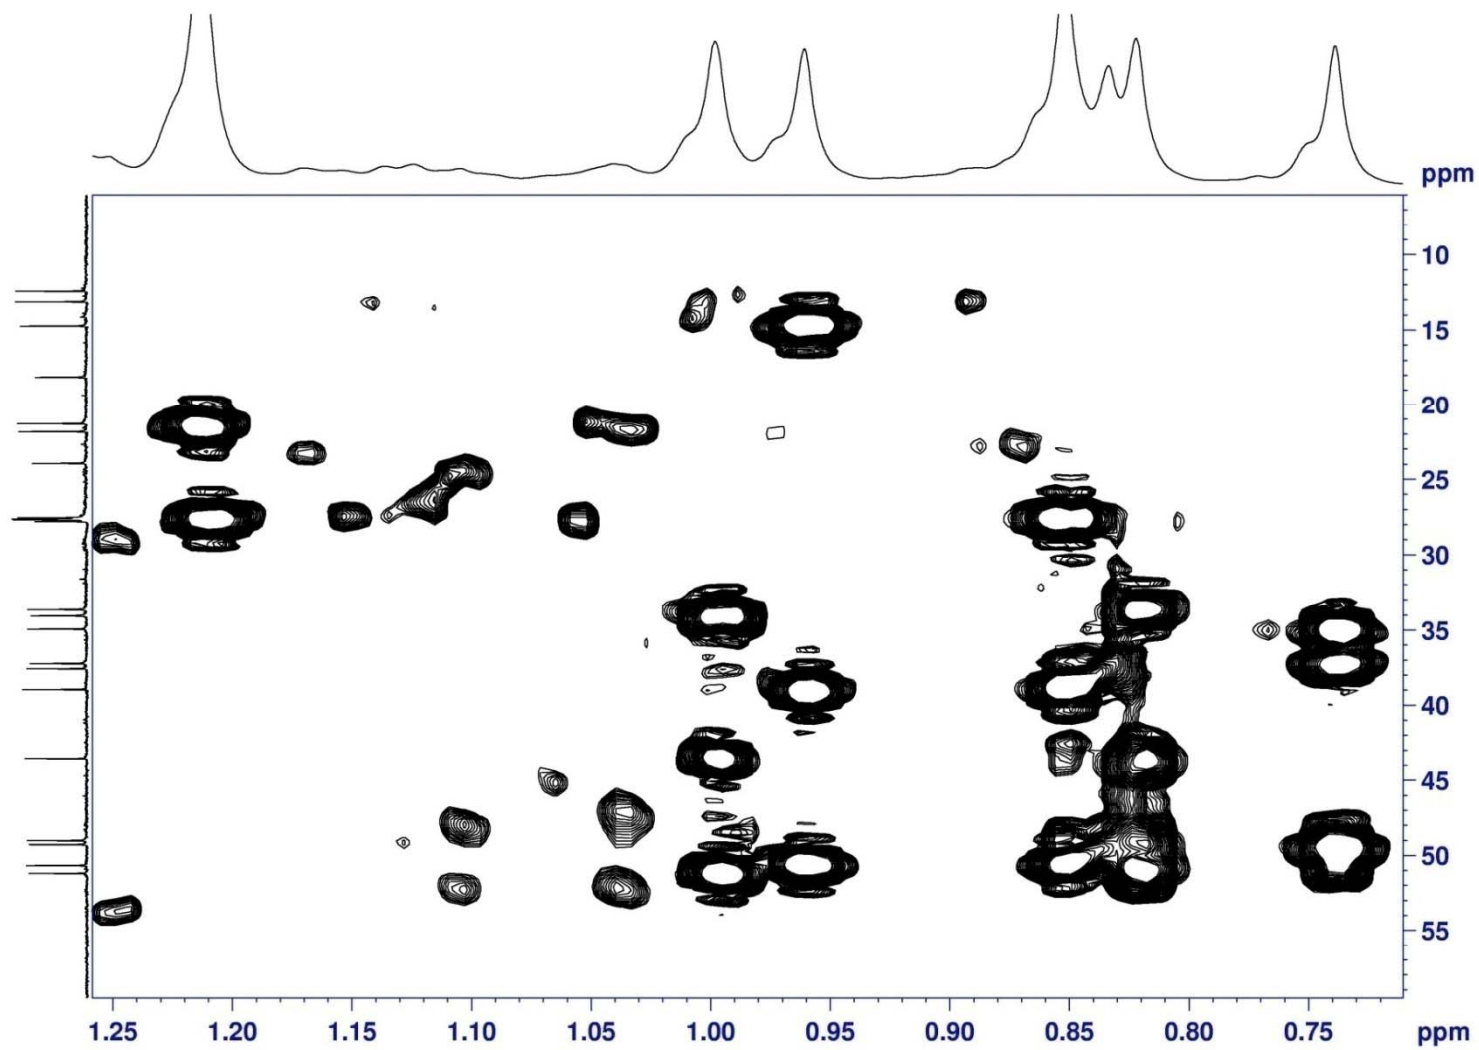



# NOESY (400 MHz) spectrum of compound **4** in CDCl<sub>3</sub>

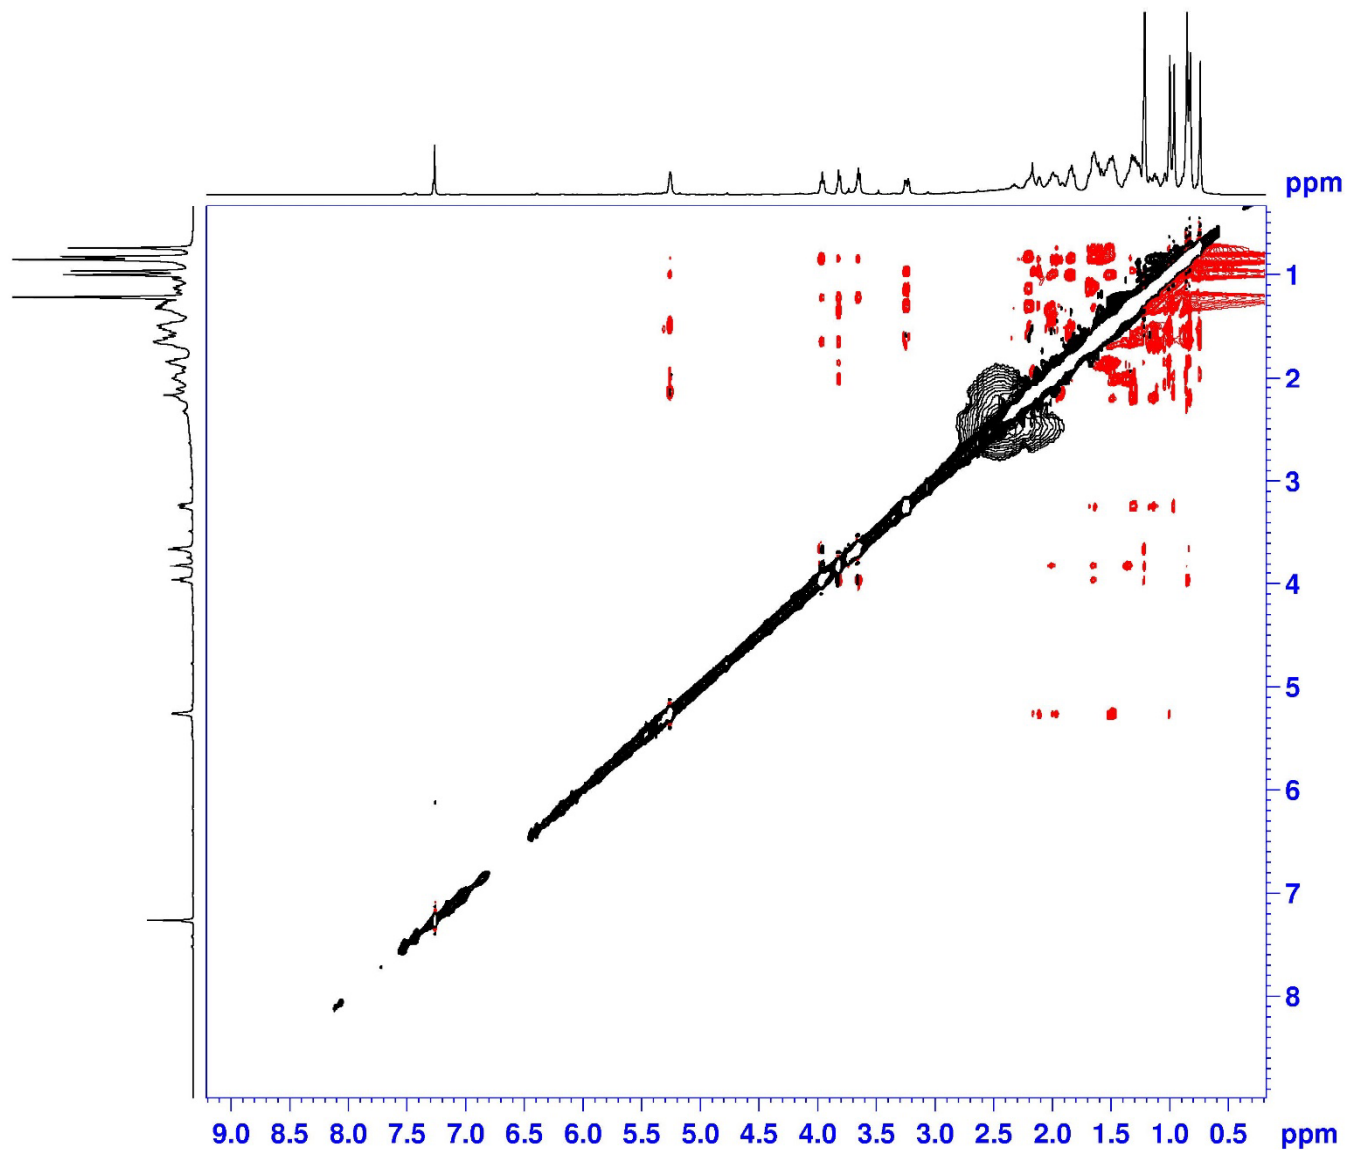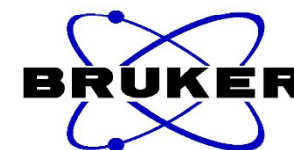

NAME LRX-XG-53-5  
EXPNO 7  
PROCNO 1  
Date\_ 20180113  
Time 3.31  
INSTRUM spect  
PROBHD 5 mm CPPBBO BB  
PULPROG noesygpphpp  
TD 2048  
SOLVENT CDCl3  
NS 16  
DS 32  
SWH 4000.000 Hz  
FIDRES 1.953125 Hz  
AQ 0.2560500 se  
RG 91.64  
DW 125.000 us  
DE 10.00 us  
TE 297.0 K  
D0 0.00011036 se  
D1 1.99385595 se  
D8 0.30000001 se  
D11 0.03000000 se  
D12 0.00002000 se  
D16 0.00020000 se  
IN0 0.00025000 se

===== CHANNEL f1 =====  
SFO1 400.1318006 MH  
NUC1 1H  
P1 11.50 us  
P2 23.00 us  
P17 2500.00 us  
ND0 1  
TD 256  
SFO1 400.1318 MH  
FIDRES 15.625000 Hz  
SW 9.997 pp  
FnMODE States-TPPI  
SI 1024  
SF 400.1300098 MH  
WDW QSINE  
SSB 2  
LB 0.00 Hz  
GB 0  
PC 1.00  
SI 1024  
MC2 States-TPPI  
SF 400.1300098 MH  
WDW QSINE  
SSB 2

NOESY (400 MHz) spectrum of compound **4** in CDCl<sub>3</sub>

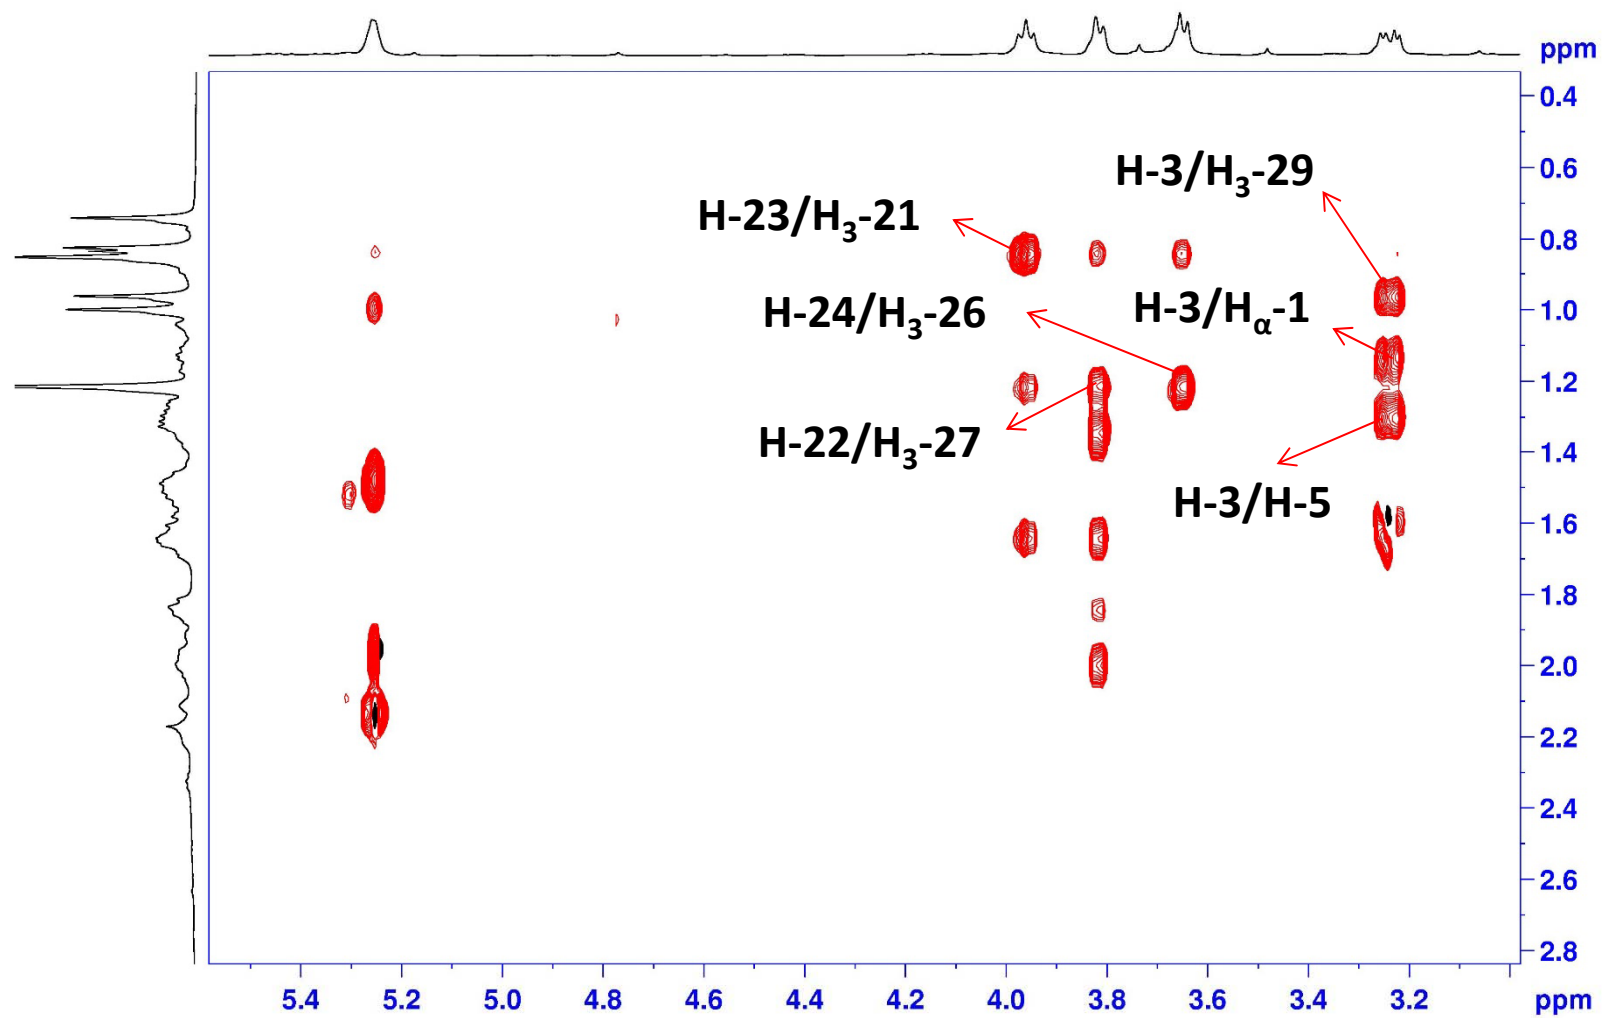

NOESY (400 MHz) spectrum of compound **4** in  $\text{CDCl}_3$

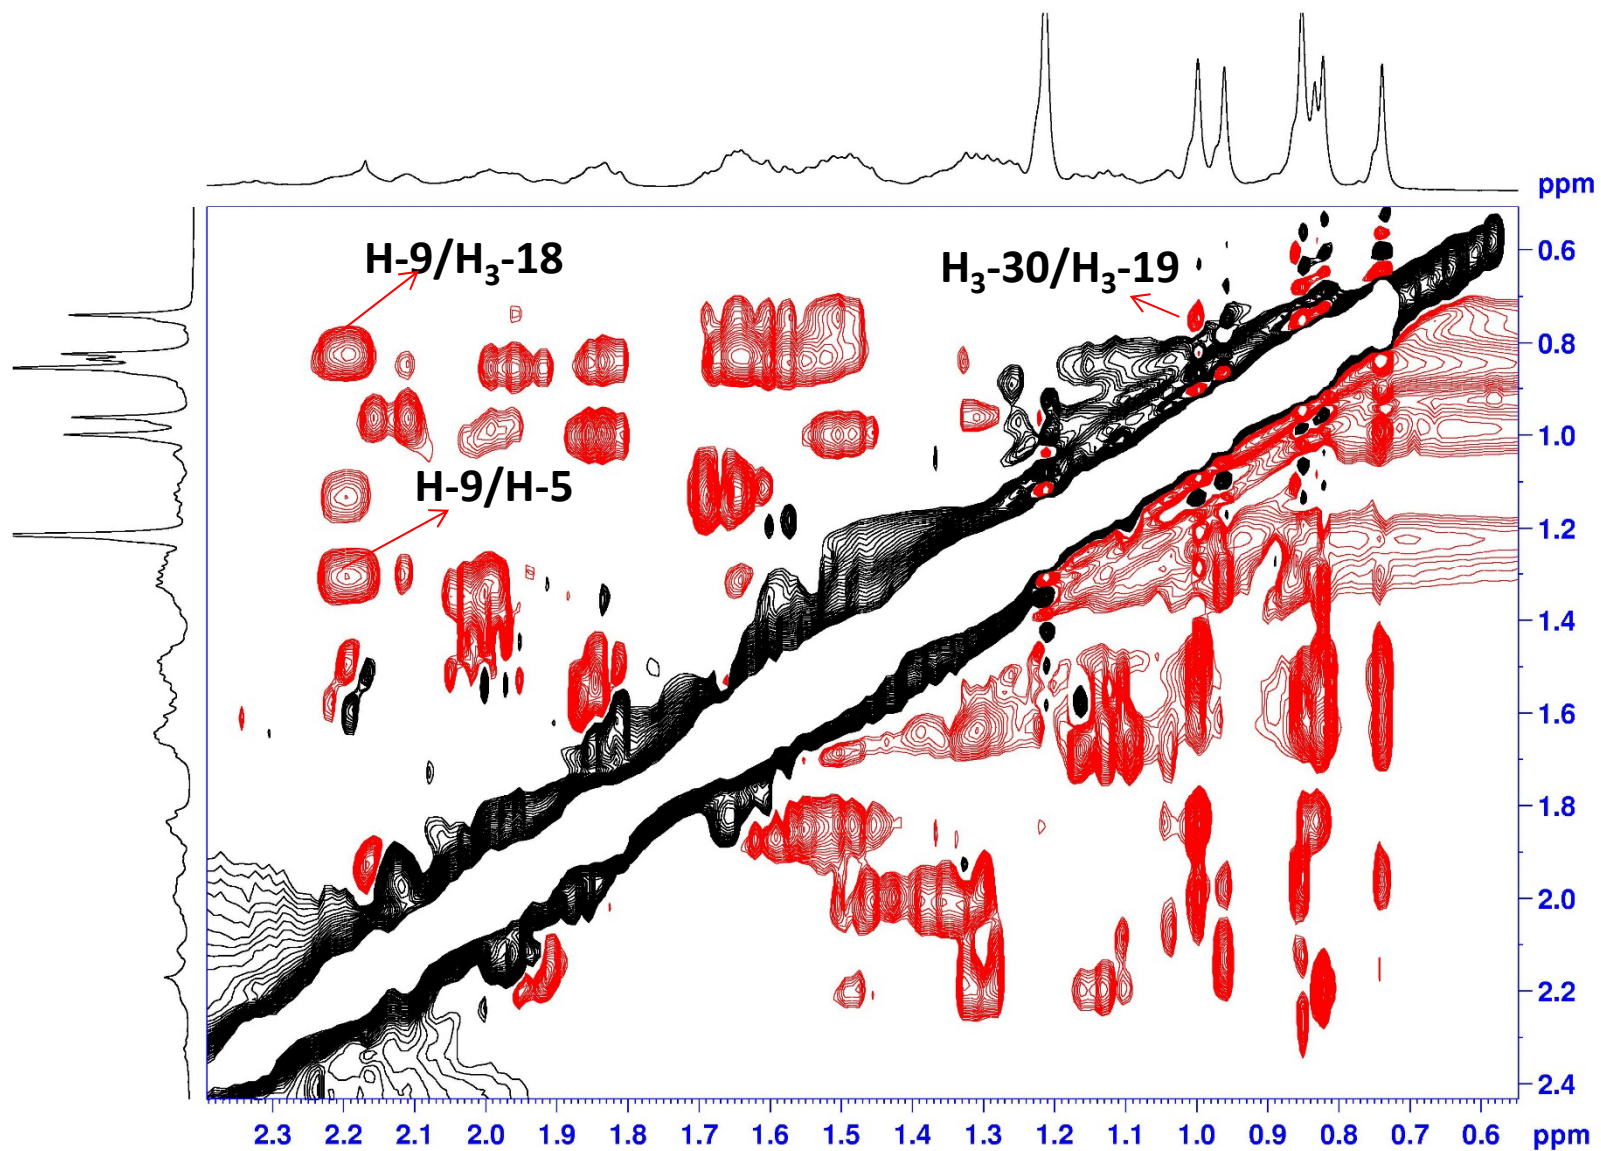

NOESY (400 MHz) spectrum of compound **4** in  $\text{CDCl}_3$

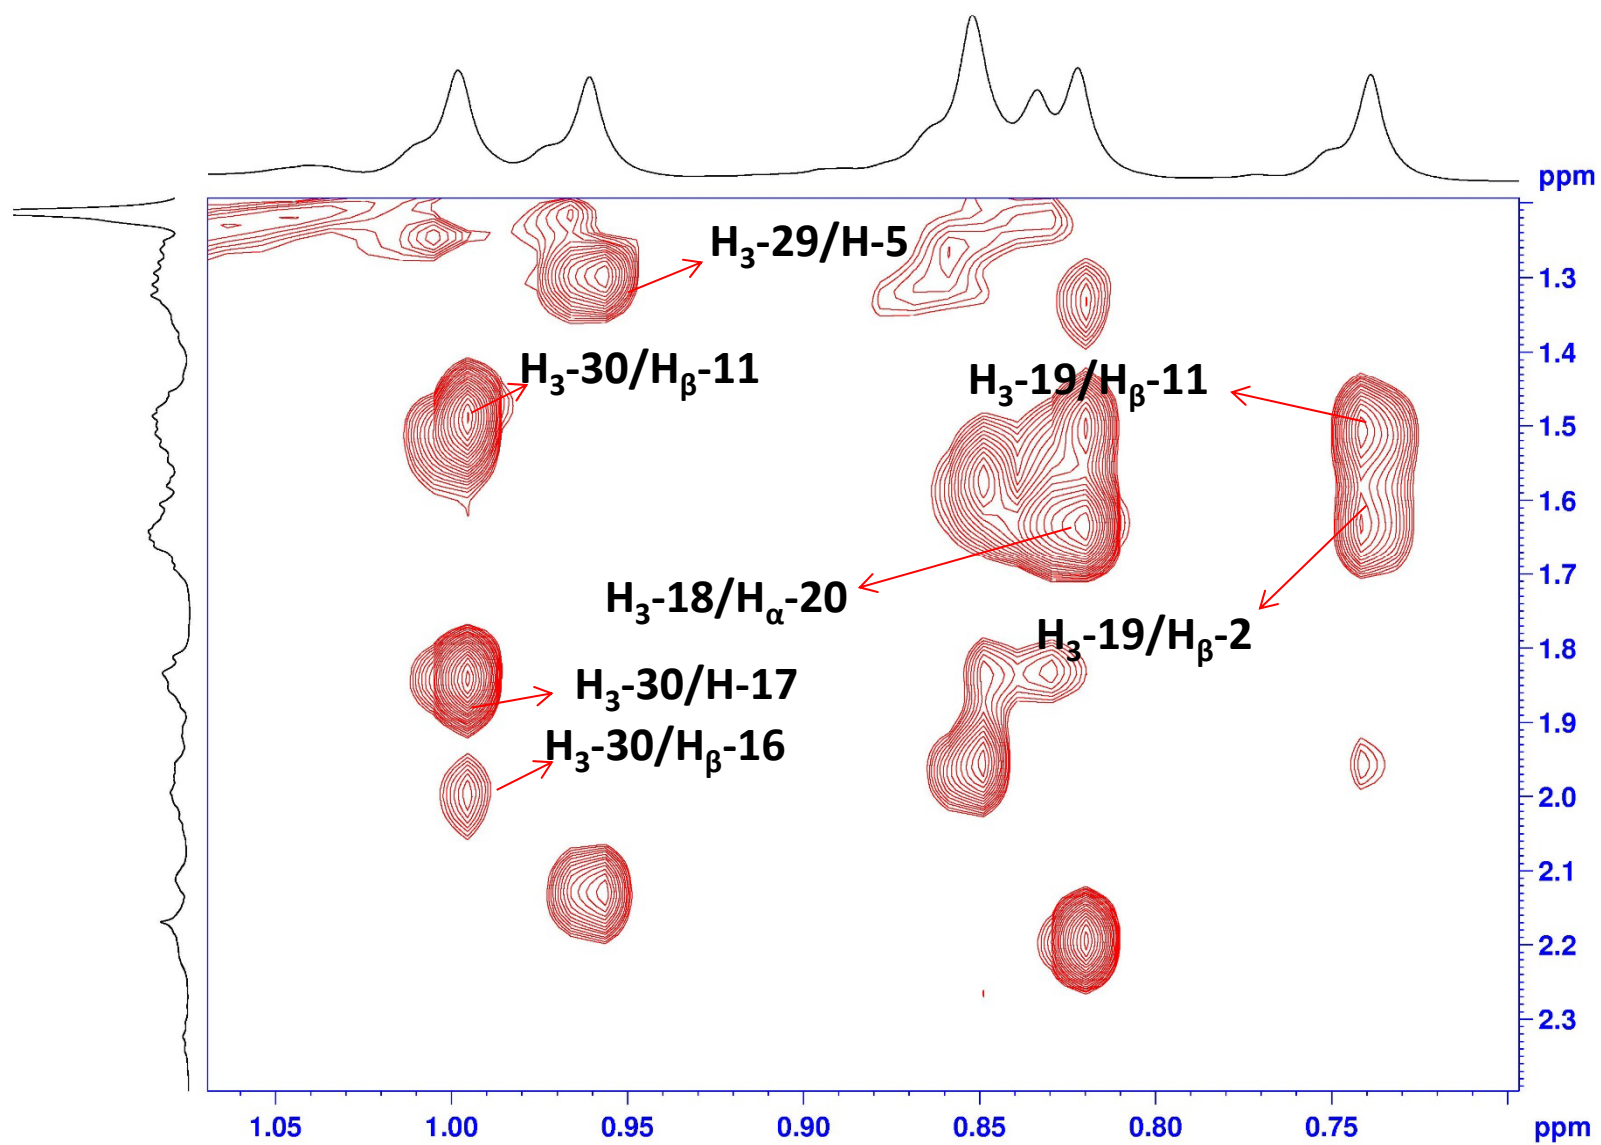

# HR-ESIMS for compound 5

## Generic Display Report

### Analysis Info

Analysis Name D:\Data\MS\data\201802\liwanshan\_XG-52-4\_neg\_54\_01\_4272.d  
Method LC\_Direct Infusion\_neg\_100-1000mz.m  
Sample Name liwanshan\_XG-52-4\_neg  
Comment

Acquisition Date 2/8/2018 5:06:23 PM

Operator SCSIO  
Instrument maXis

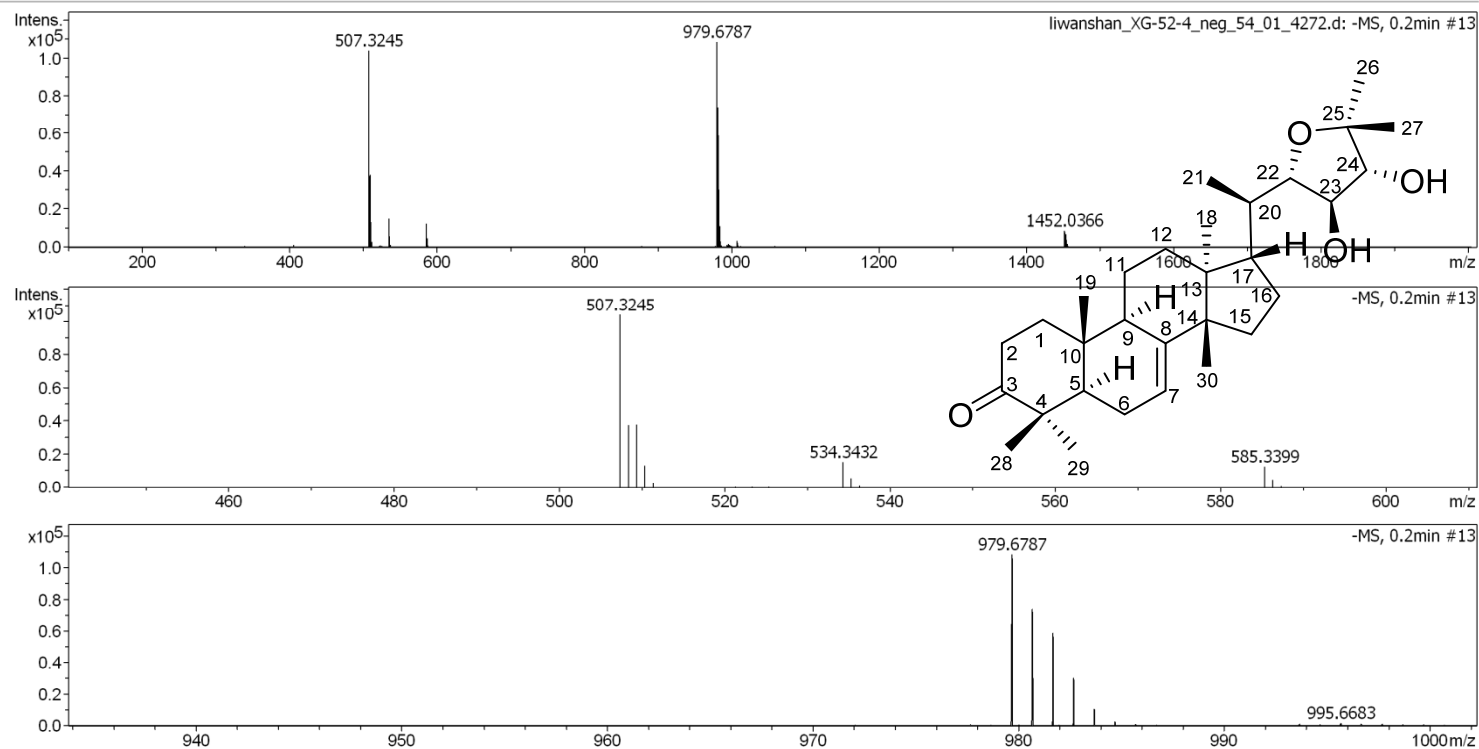

# HR-ESIMS for compound 5

## Mass Spectrum SmartFormula Report

### Analysis Info

Analysis Name D:\Data\MS\data\201802\liwanshan\_XG-52-4\_neg\_54\_01\_4272.d  
 Method LC\_Direct Infusion\_neg\_100-1000mz.m  
 Sample Name liwanshan\_XG-52-4\_neg  
 Comment

Acquisition Date 2/8/2018 5:06:23 PM  
 Operator SCSIO  
 Instrument maXis 255552.00029

### Acquisition Parameter

|             |          |                      |          |                  |           |
|-------------|----------|----------------------|----------|------------------|-----------|
| Source Type | ESI      | Ion Polarity         | Negative | Set Nebulizer    | 0.4 Bar   |
| Focus       | Active   | Set Capillary        | 4000 V   | Set Dry Heater   | 180 °C    |
| Scan Begin  | 100 m/z  | Set End Plate Offset | -500 V   | Set Dry Gas      | 4.0 l/min |
| Scan End    | 2000 m/z | Set Charging Voltage | 0 V      | Set Divert Valve | Waste     |
|             |          | Set Corona           | 0 nA     | Set APCI Heater  | 0 °C      |

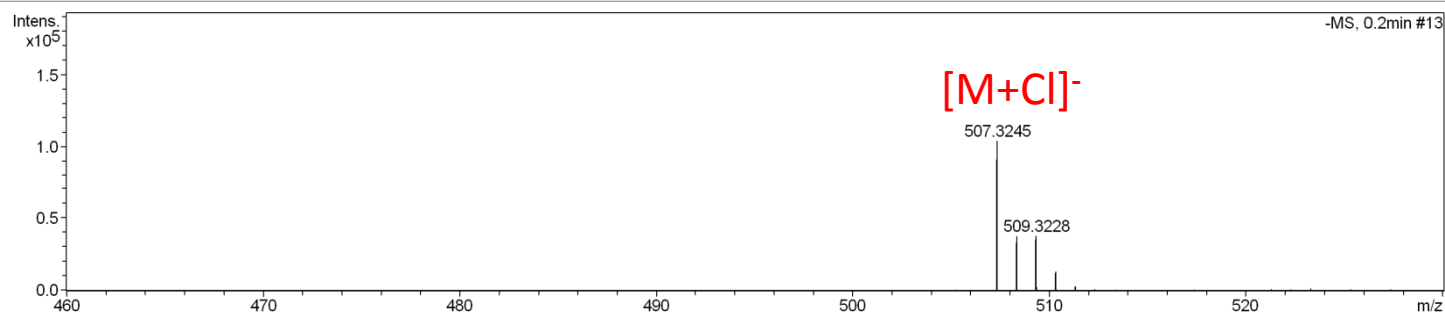

| Meas. m/z | # | Ion Formula | Score  | m/z      | err [ppm] | err [mDa] | mSigma | rdb  | e <sup>-</sup> Conf | N-Rule |
|-----------|---|-------------|--------|----------|-----------|-----------|--------|------|---------------------|--------|
| 507.3245  | 1 | C30H48ClO4  | 100.00 | 507.3247 | -0.3      | -0.2      | 15.8   | 6.5  | even                | ok     |
| 979.6787  | 1 | C60H96ClO8  | 70.91  | 979.6799 | -1.2      | -1.2      | 10.7   | 12.5 | even                | ok     |

liwanshan\_XG-52-4\_neg\_54\_01\_4272.d  
 Bruker Compass DataAnalysis 4.1

printed: 2/8/2018 5:21:18 PM

by: SCSIO Page 1 of 1

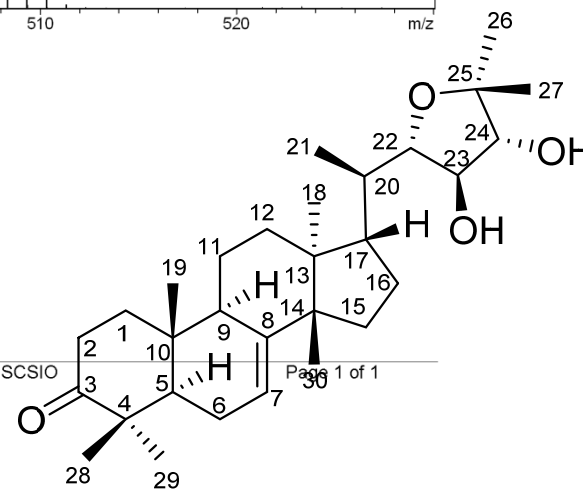

S112

# <sup>1</sup>H NMR (400 MHz) spectrum of compound **5** in CDCl<sub>3</sub>

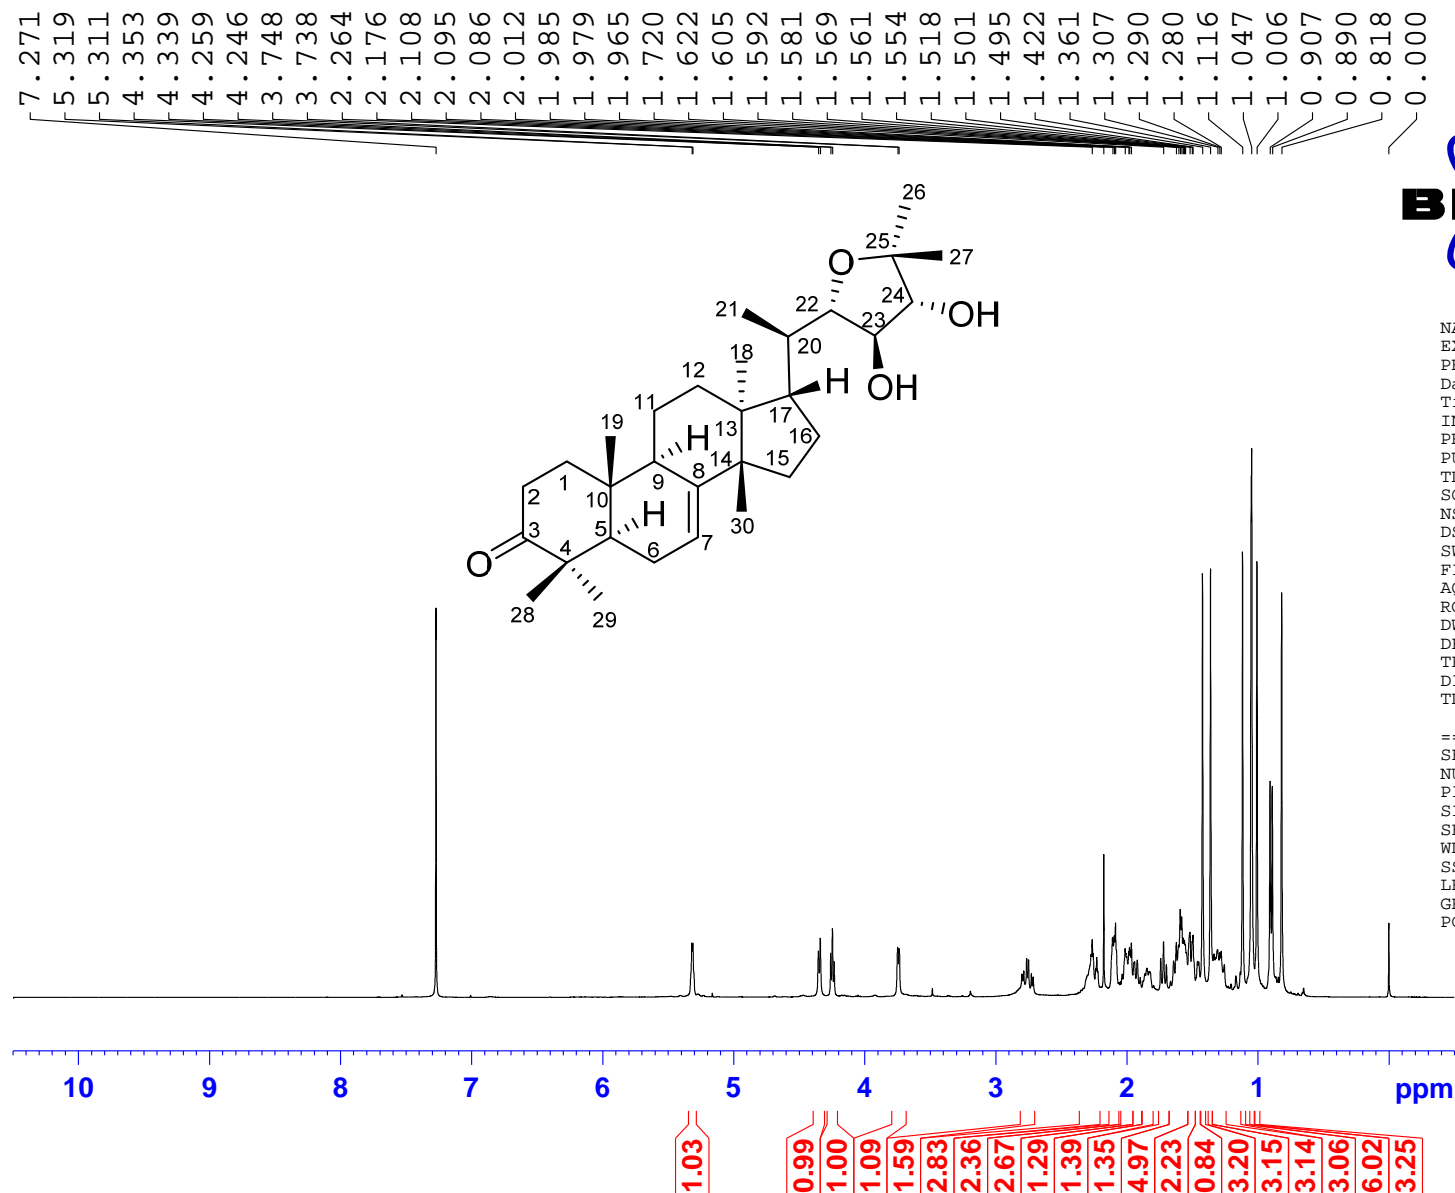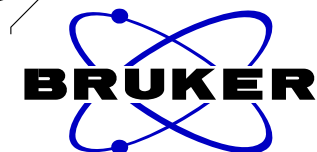

```

NAME          LRX-XG-52-4
EXPNO          1
PROCNO         1
Date_          20171221
Time           20.41
INSTRUM        spect
PROBHD         5 mm CPPBBO BB
PULPROG        zg30
TD             65536
SOLVENT        CDCl3
NS             16
DS             2
SWH            8223.685 Hz
FIDRES         0.125483 Hz
AQ            3.9846387 sec
RG            41.06
DW            60.800 usec
DE            10.00 usec
TE            297.0 K
D1            1.00000000 sec
TD0           1

===== CHANNEL f1 =====
SFO1          400.1324710 MHz
NUC1          1H
P1            11.50 usec
SI            65536
SF            400.1300051 MHz
WDW           EM
SSB           0
LB            0.30 Hz
GB            0
PC            1.00
    
```

$^1\text{H}$  NMR (400 MHz) spectrum of compound **5** in  $\text{CDCl}_3$

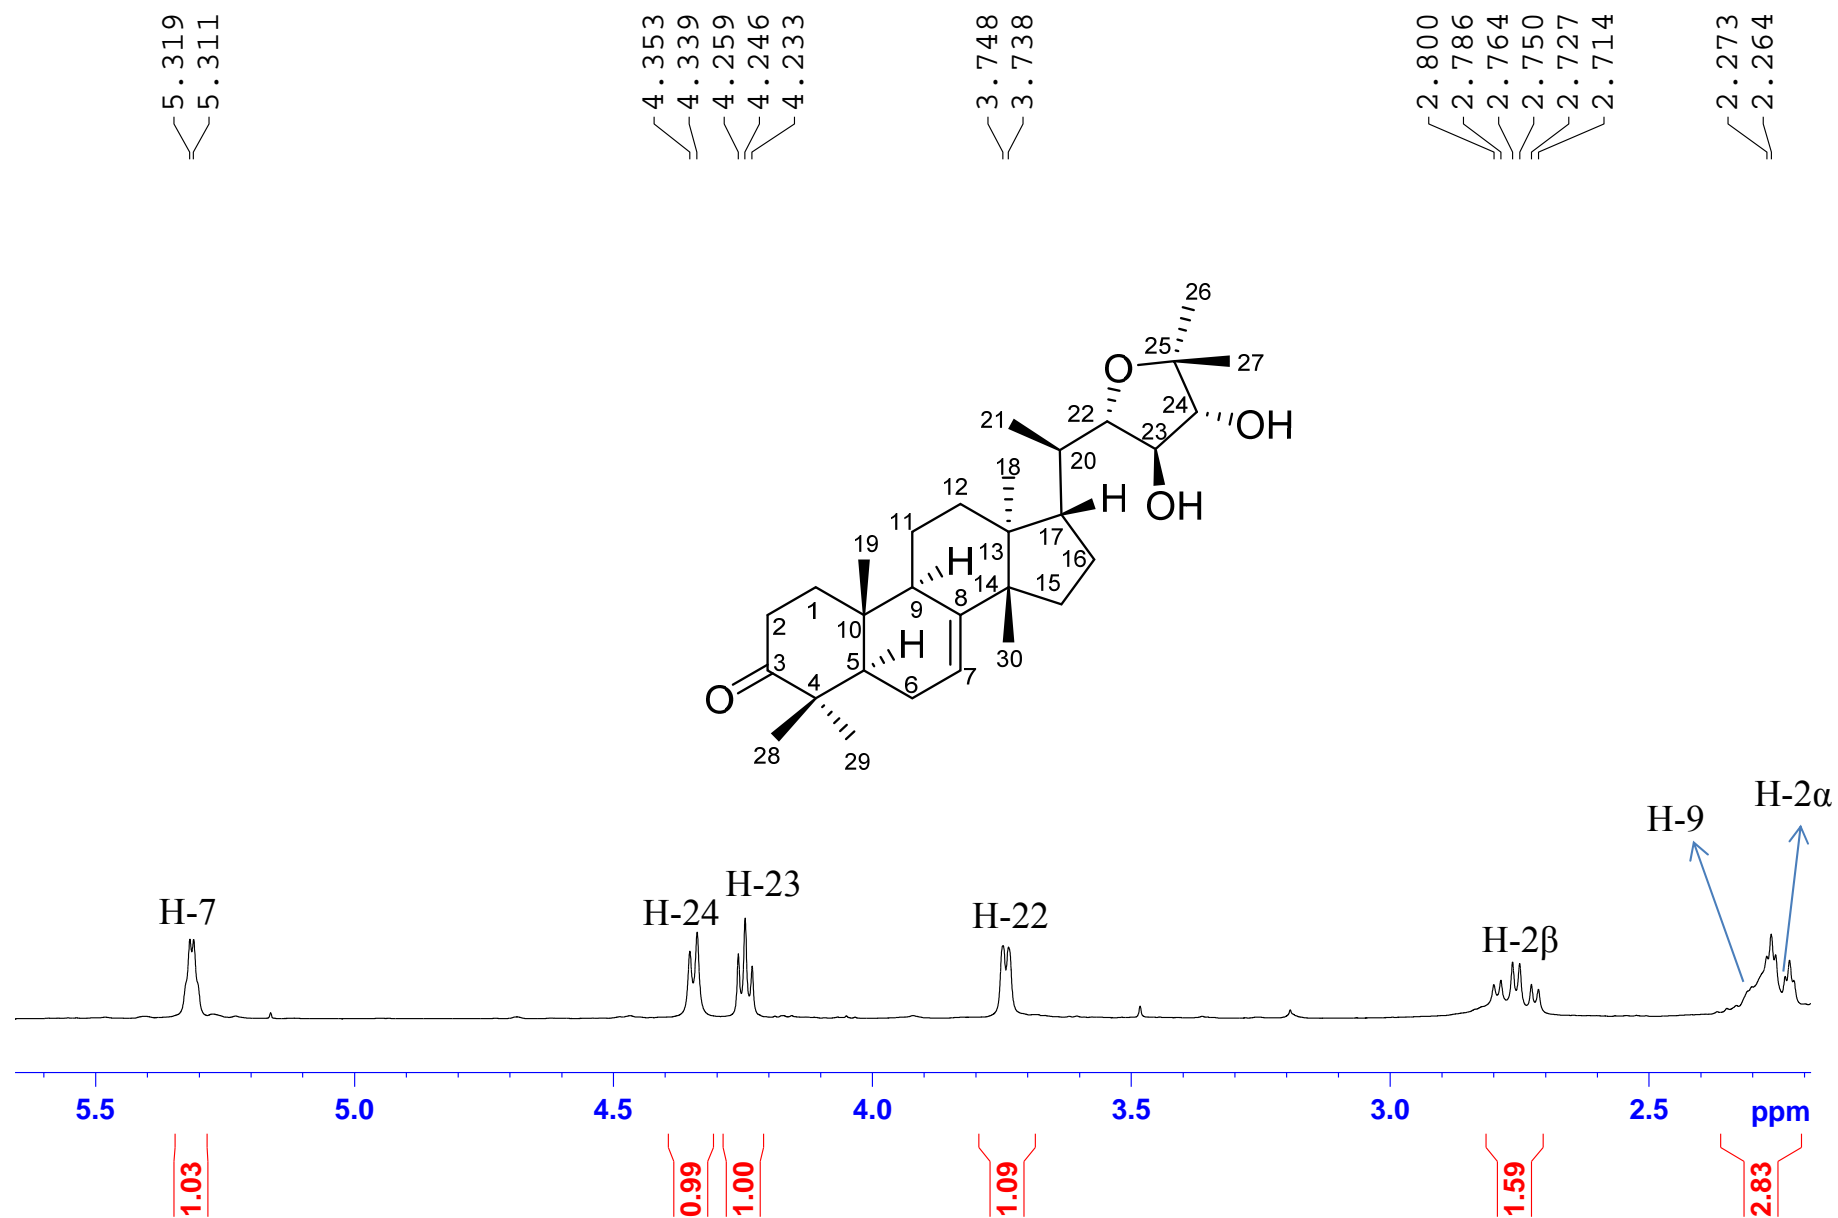



$^1\text{H}$  NMR (400 MHz) spectrum of compound **5** in  $\text{CDCl}_3$

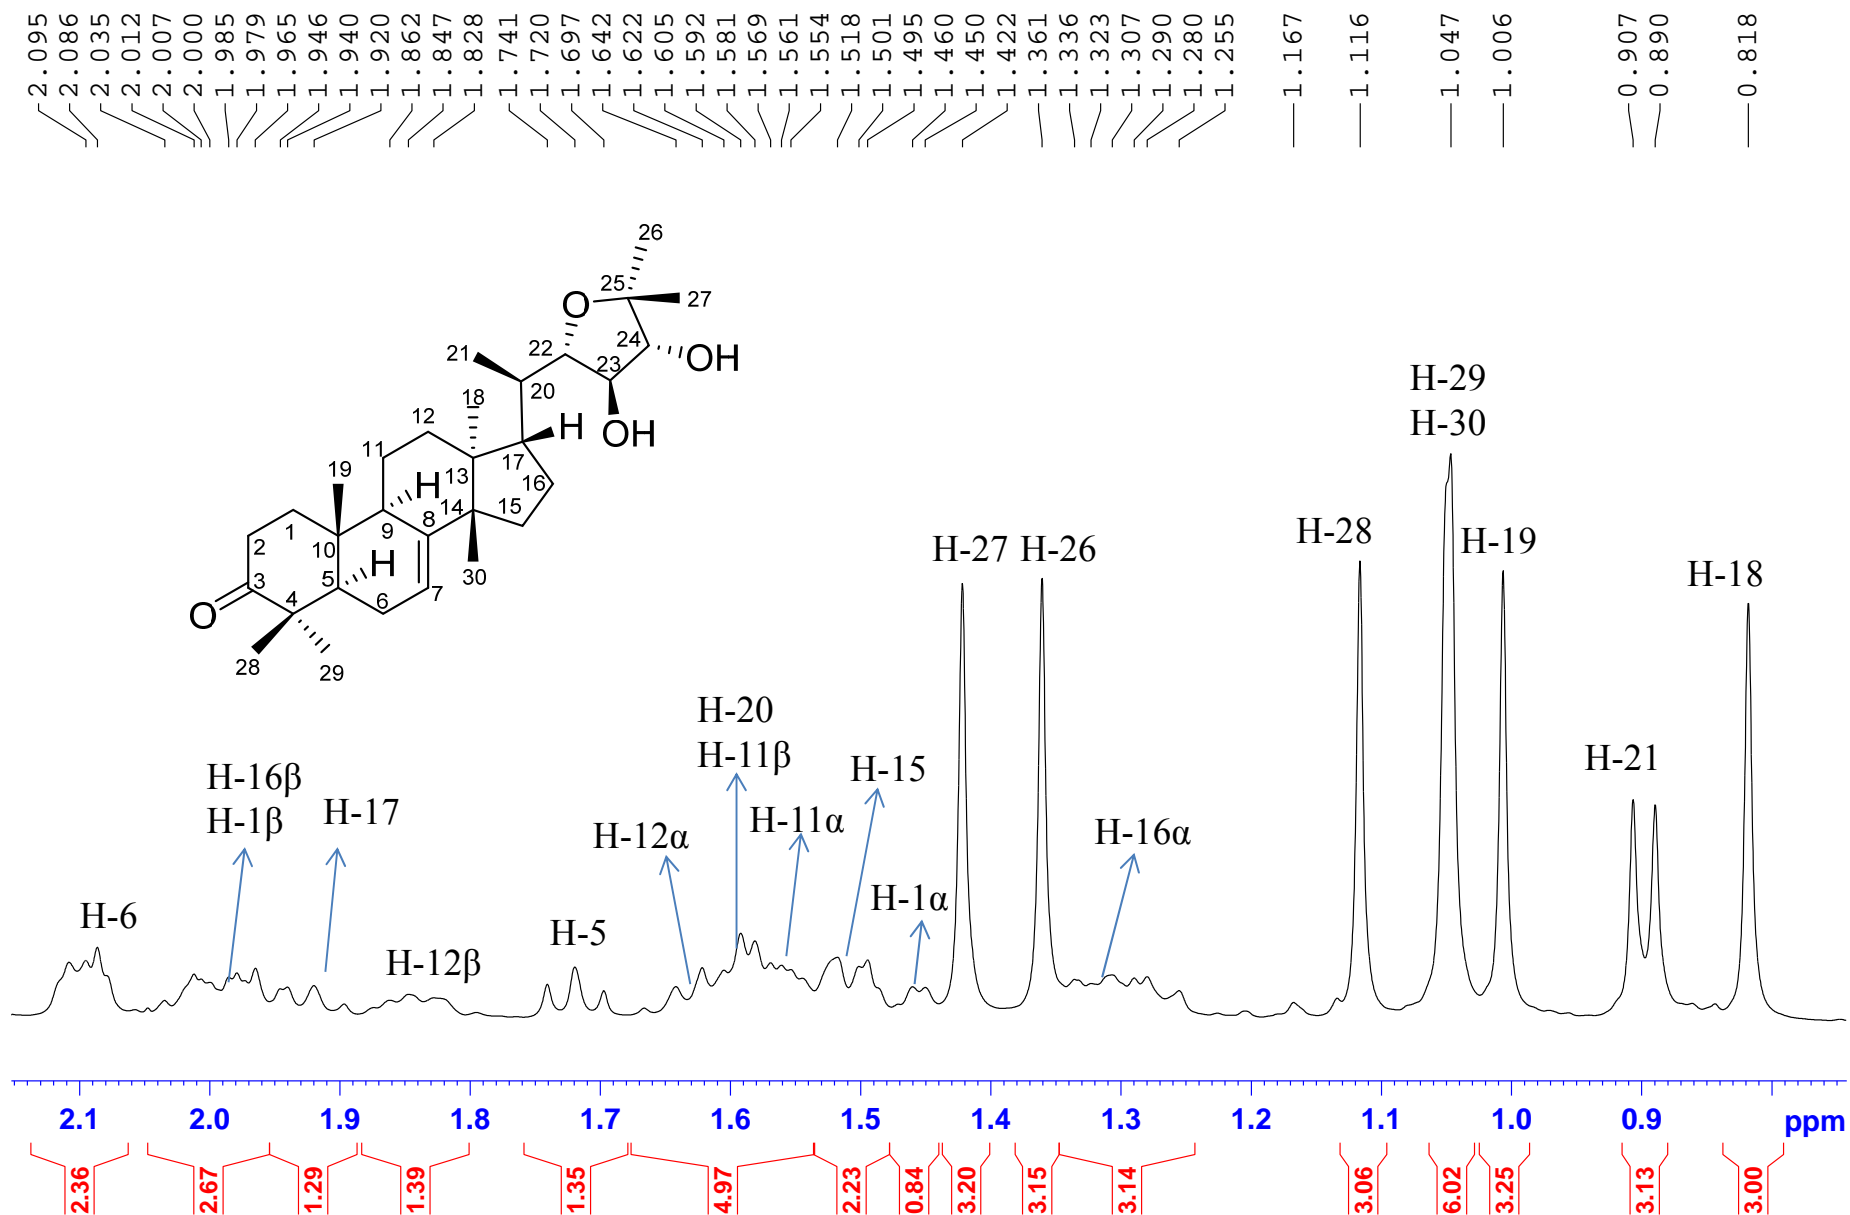

$^{13}\text{C}$  NMR (100 MHz) spectrum of compound **5** in  $\text{CDCl}_3$

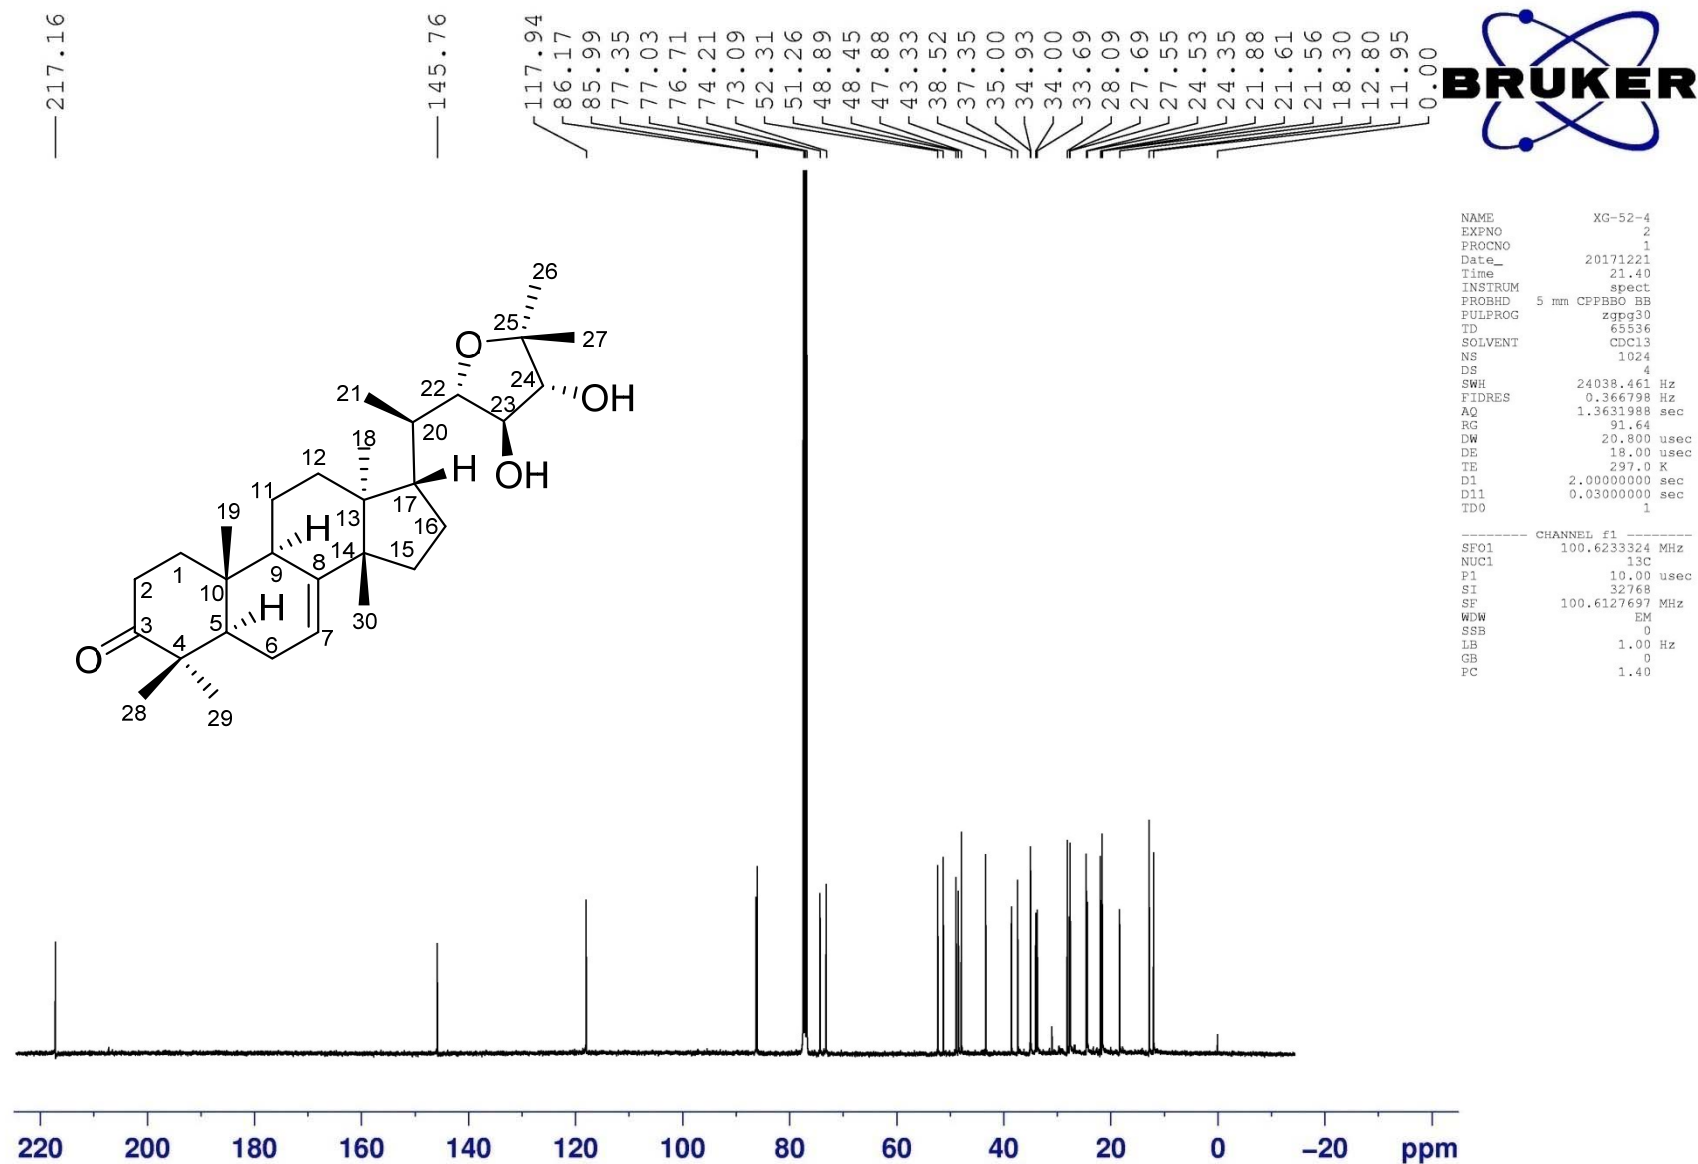

$^{13}\text{C}$  NMR (100 MHz) spectrum of compound **5** in  $\text{CDCl}_3$

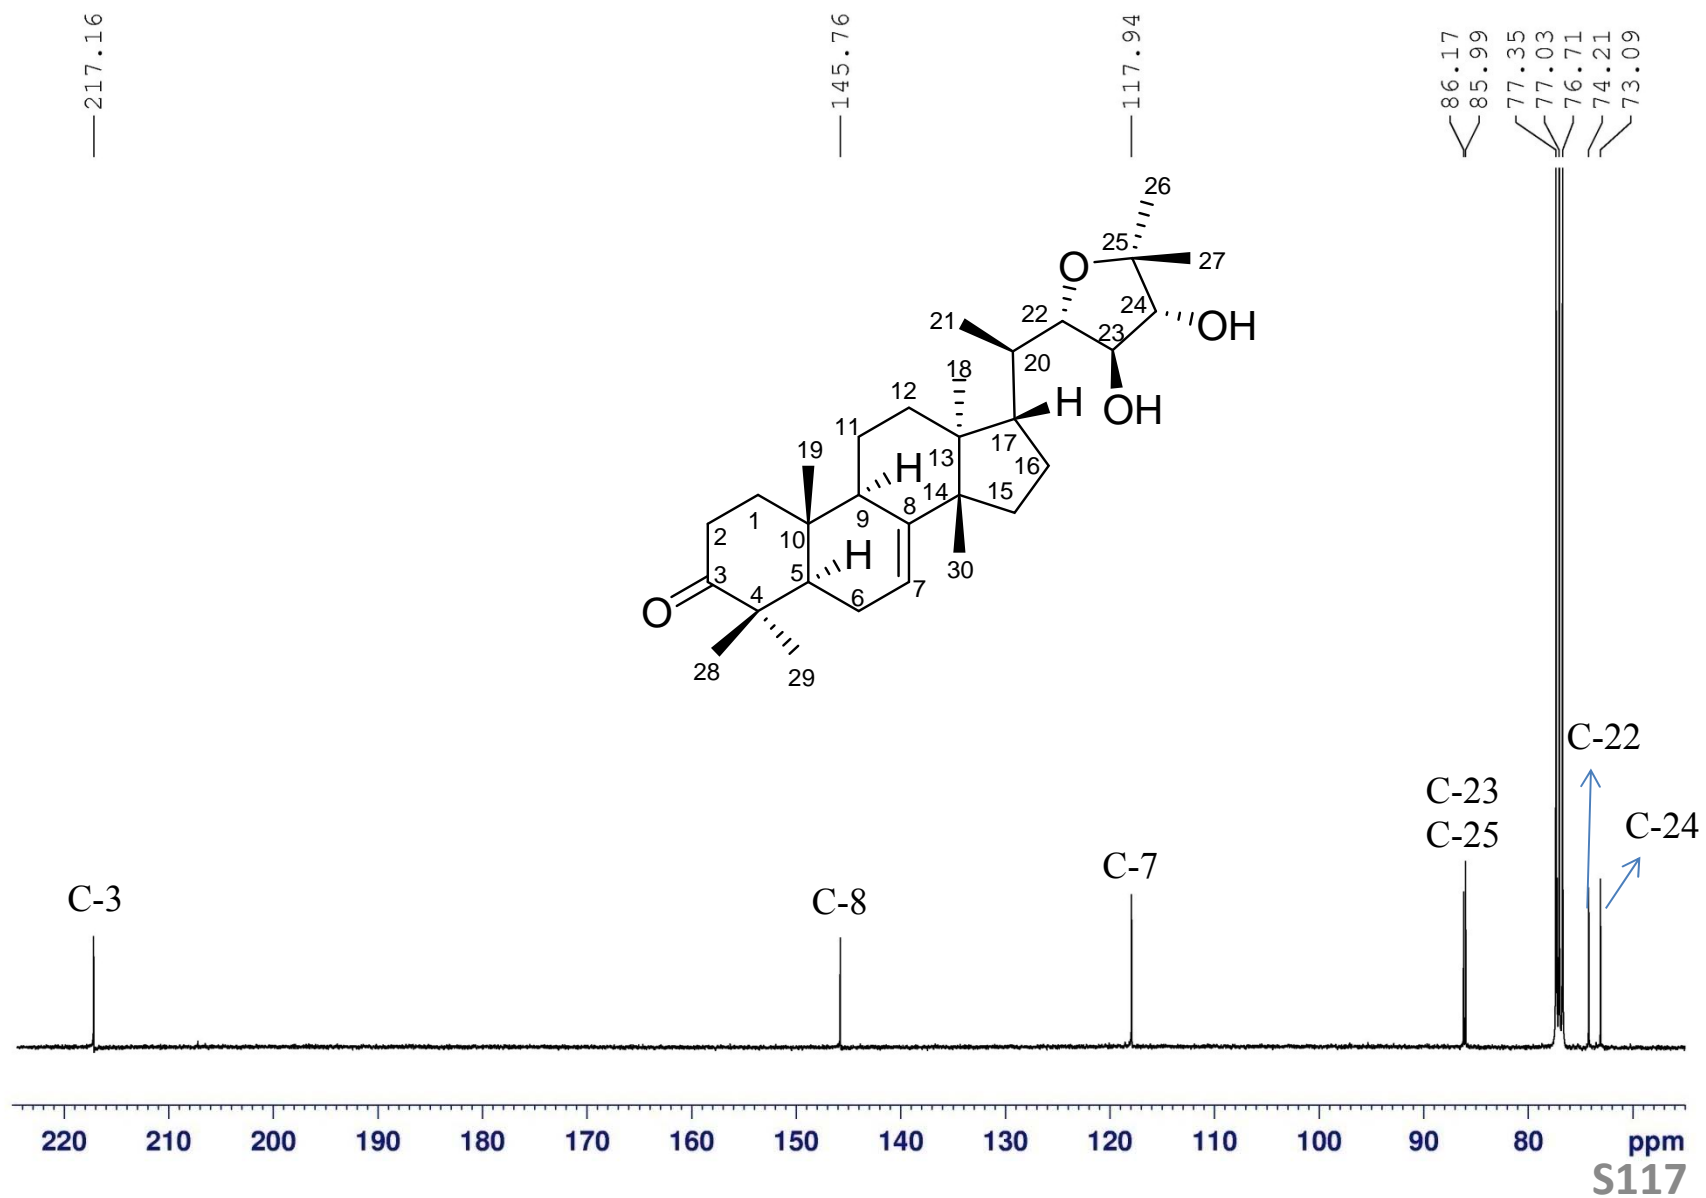

$^{13}\text{C}$  NMR (100 MHz) spectrum of compound **5** in  $\text{CDCl}_3$

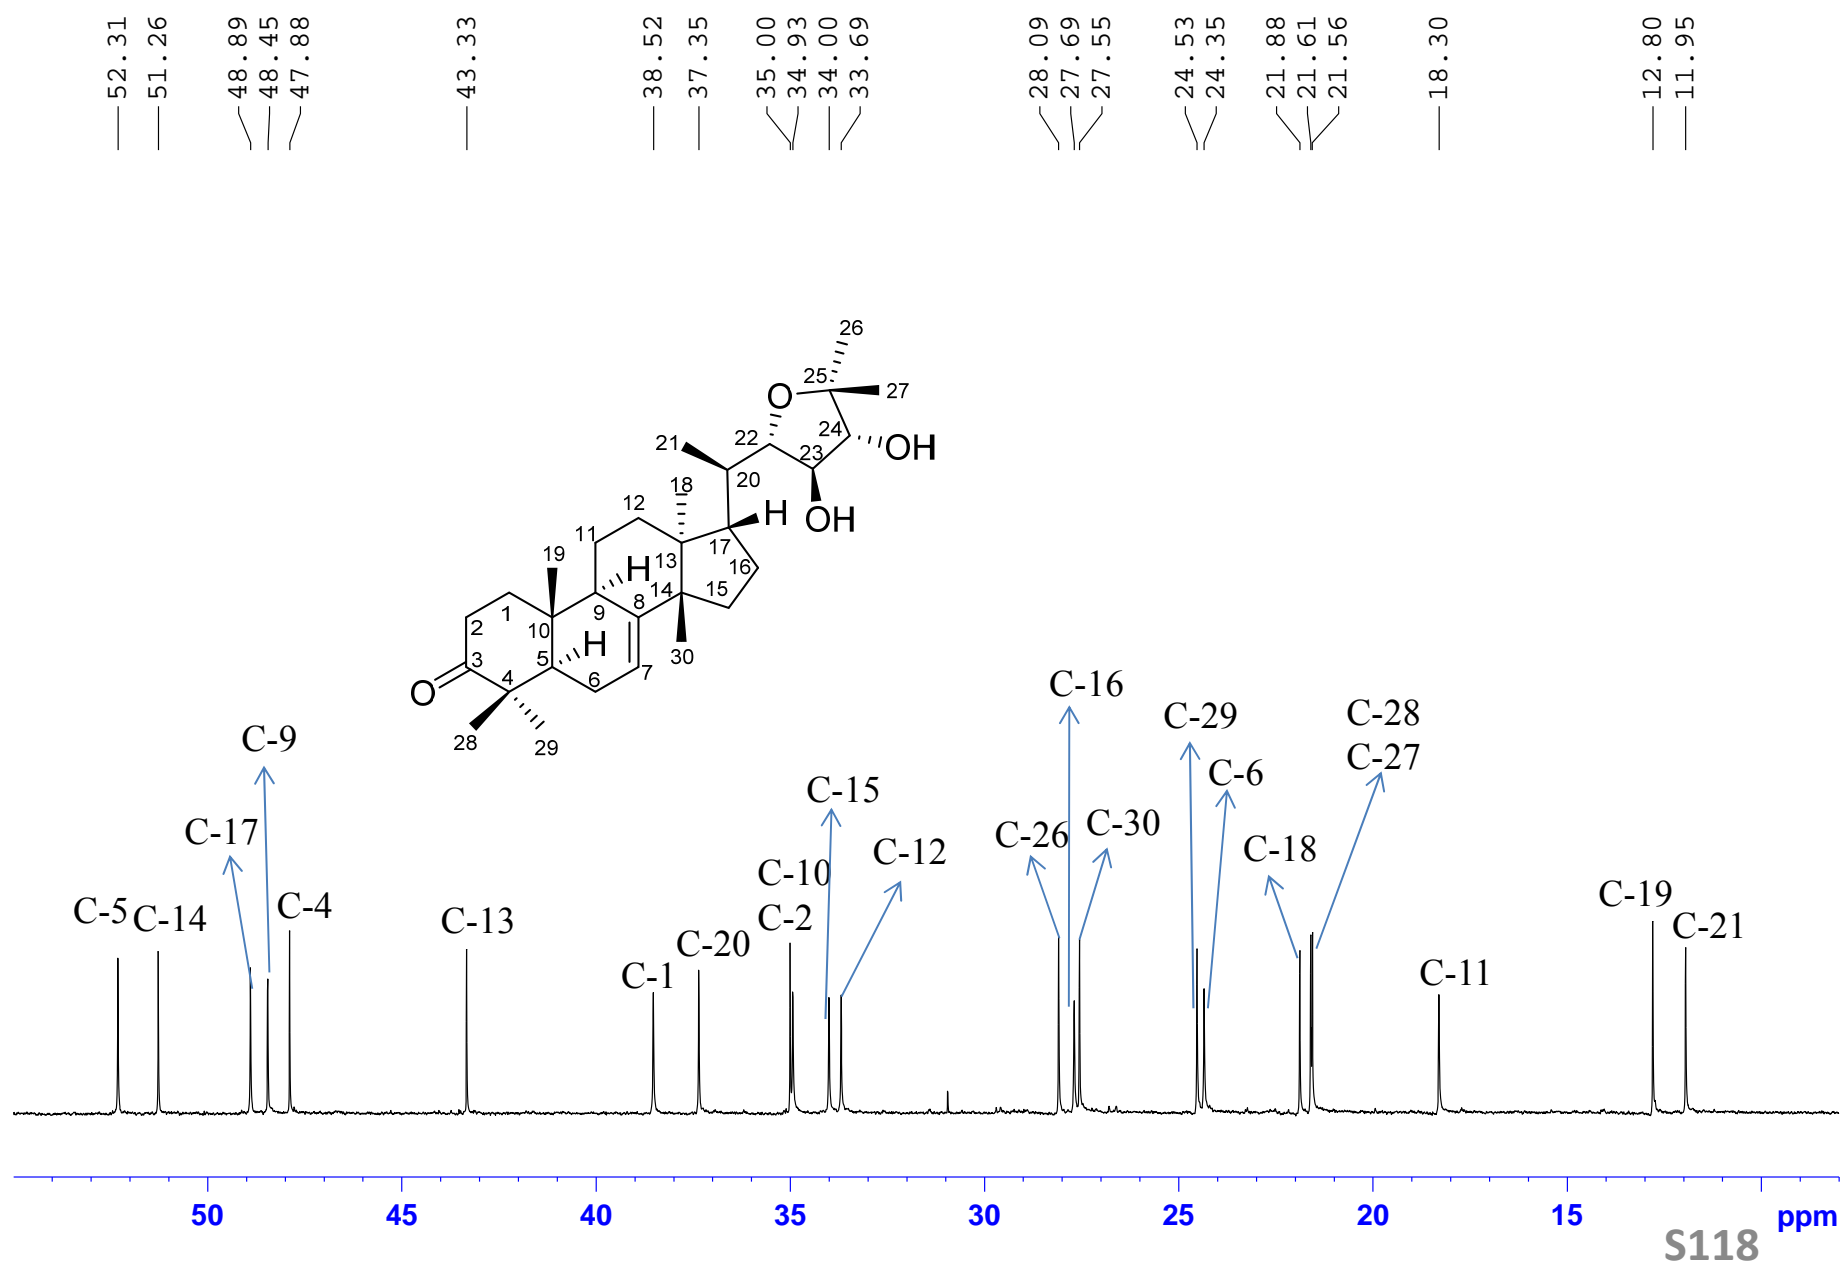

# DEPT135 (100 MHz) spectrum of compound **5** in CDCl<sub>3</sub>

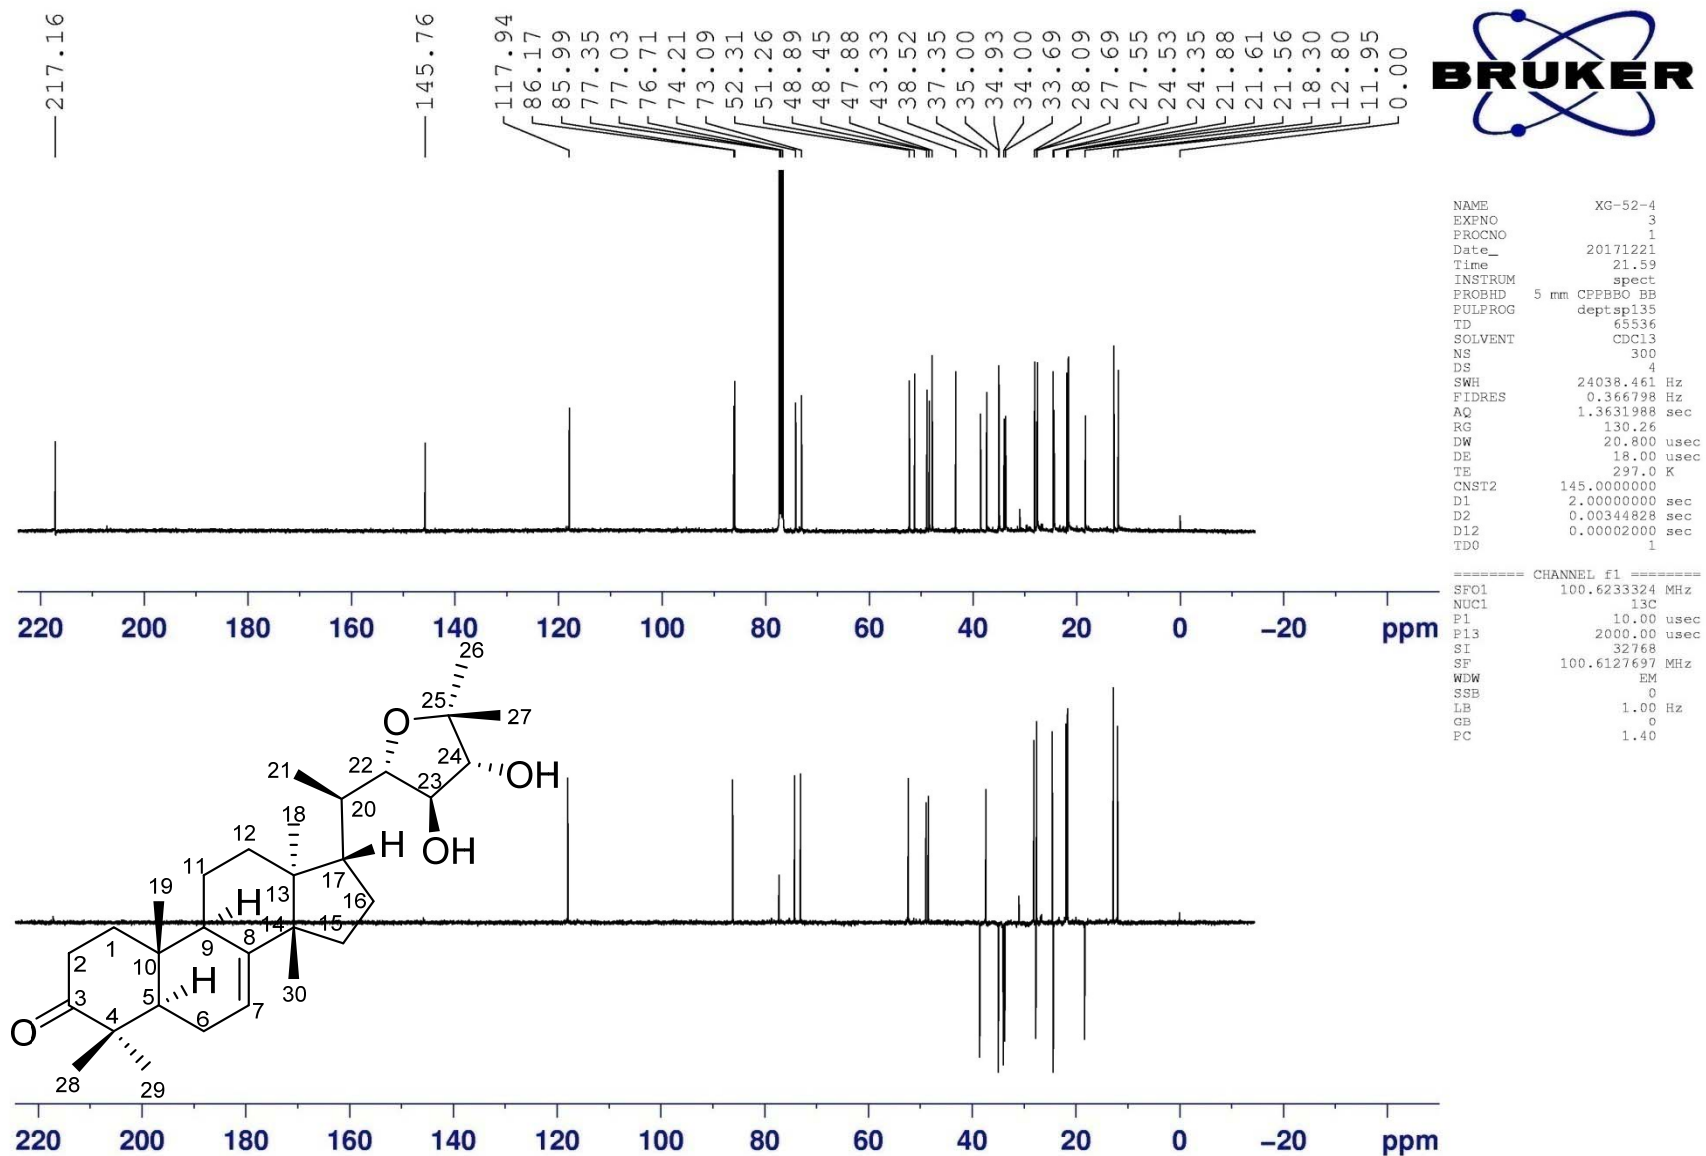

DEPT135 (100 MHz) spectrum of compound **5** in CDCl<sub>3</sub>

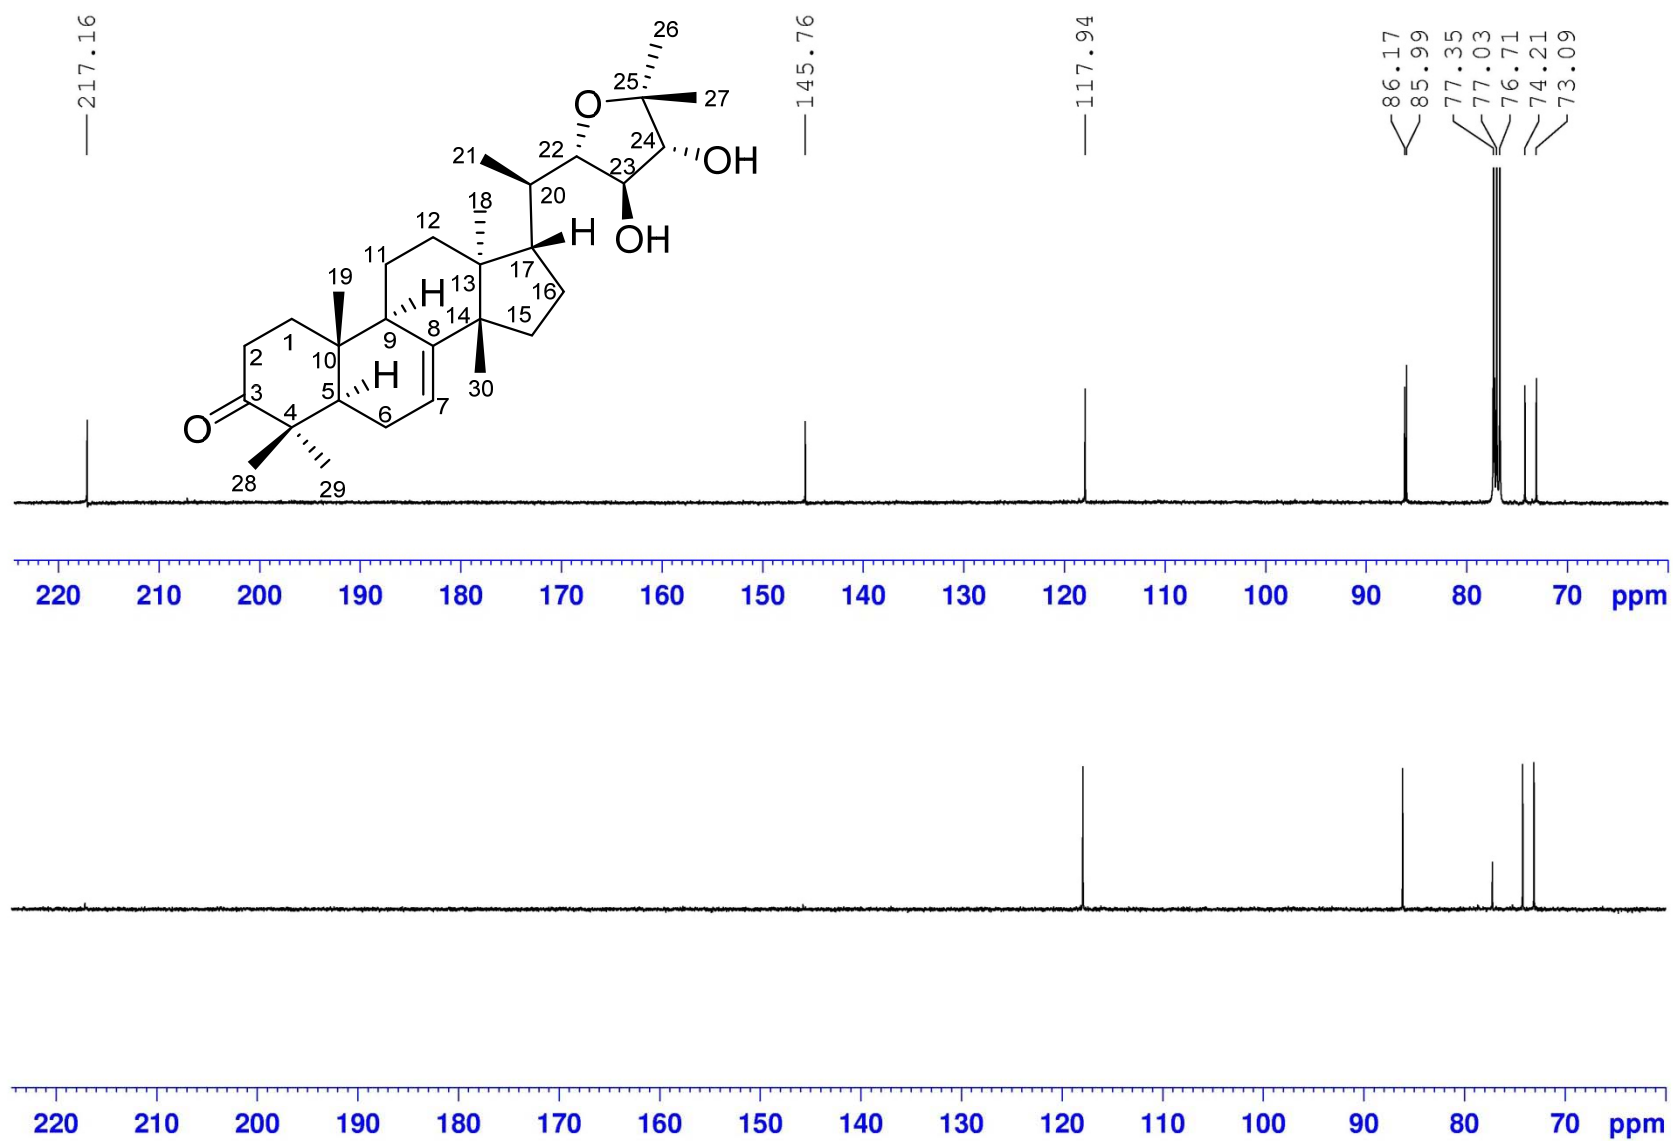

DEPT135 (100 MHz) spectrum of compound **5** in CDCl<sub>3</sub>

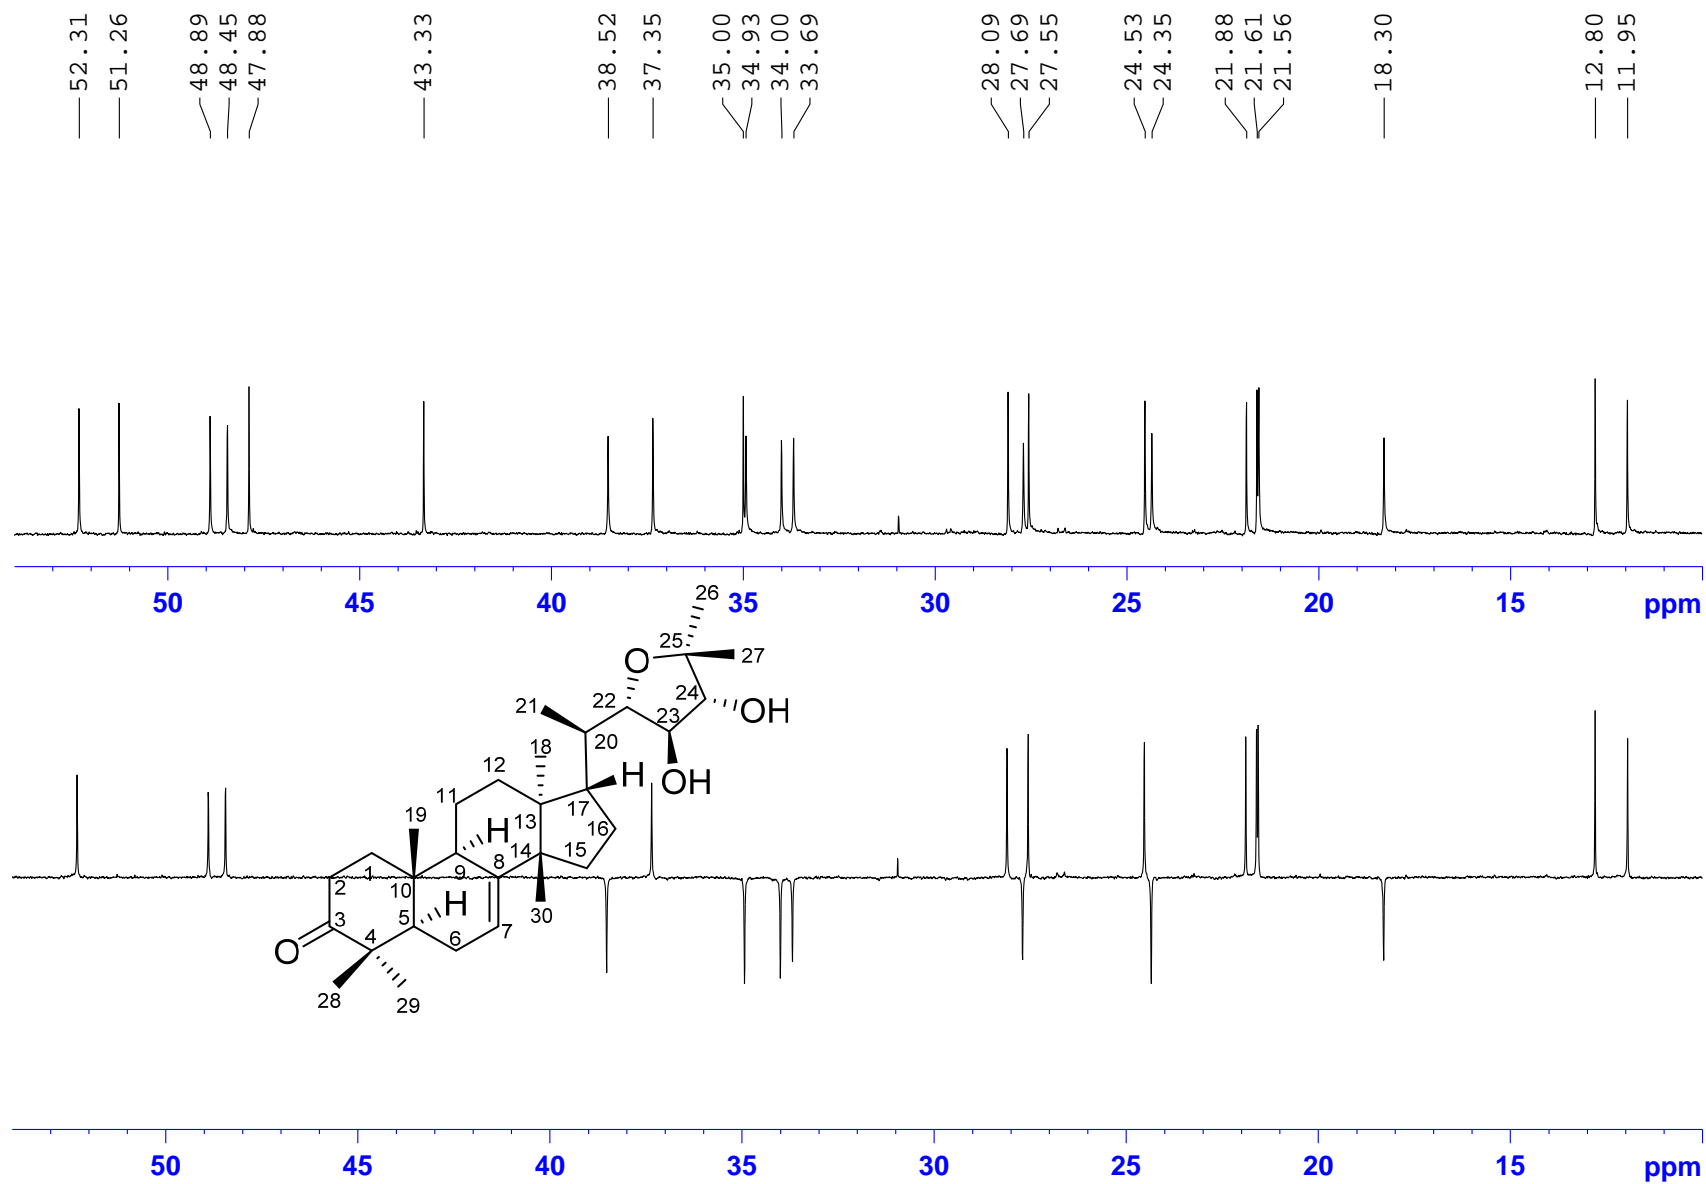



|         |            |       |    |
|---------|------------|-------|----|
| NAME    | XG-52-4    |       |    |
| EXPNO   | 4          |       |    |
| PROCNO  | 1          |       |    |
| Date_   | 20171226   |       |    |
| Time    | 19.41      |       |    |
| INSTRUM | spect      |       |    |
| PROBHD  | 5 mm       | CPBBO | BB |
| PULPROG | cpsygpppqf |       |    |
| TD      | 2048       |       |    |
| SOLVENT | CDC13      |       |    |
| NS      | 8          |       |    |
| DS      | 8          |       |    |
| SWH     | 3906.250   | Hz    |    |
| FIDRES  | 1.907349   | Hz    |    |
| AQ      | 0.2621940  | sec   |    |
| RG      | 65.23      |       |    |
| DW      | 128.000    | usec  |    |
| DE      | 10.00      | usec  |    |
| TE      | 297.0      | K     |    |
| D0      | 0.00000300 | sec   |    |
| D1      | 1.89678097 | sec   |    |
| D11     | 0.03000000 | sec   |    |
| D12     | 0.00002000 | sec   |    |
| D13     | 0.00000400 | sec   |    |
| D16     | 0.00020000 | sec   |    |
| IN0     | 0.00025600 | sec   |    |

```

===== CHANNEL f1 =====
SFO1      400.1318006 MHz
NUC1              1H
P0              11.50 usec
P1              11.50 usec
P17         2500.00 usec
ND0              1
TD              128
SFO1      400.1318 MHz
FIDRES     30.517578 Hz
SW          9.762 ppm
FnMODE      QF
SI           1024
SF          400.1300009 MHz
WDW          QSINE
SSB          0
LB          0.00 Hz
GB          0
PC          1.40
SI           1024
MC2          QF
SF          400.1300009 MHz
WDW          QSINE
SSB          0
LB          0.00 Hz
GB          0

```



$^1\text{H}$ - $^1\text{H}$  COSY (400 MHz) spectrum of compound **5** in  $\text{CDCl}_3$

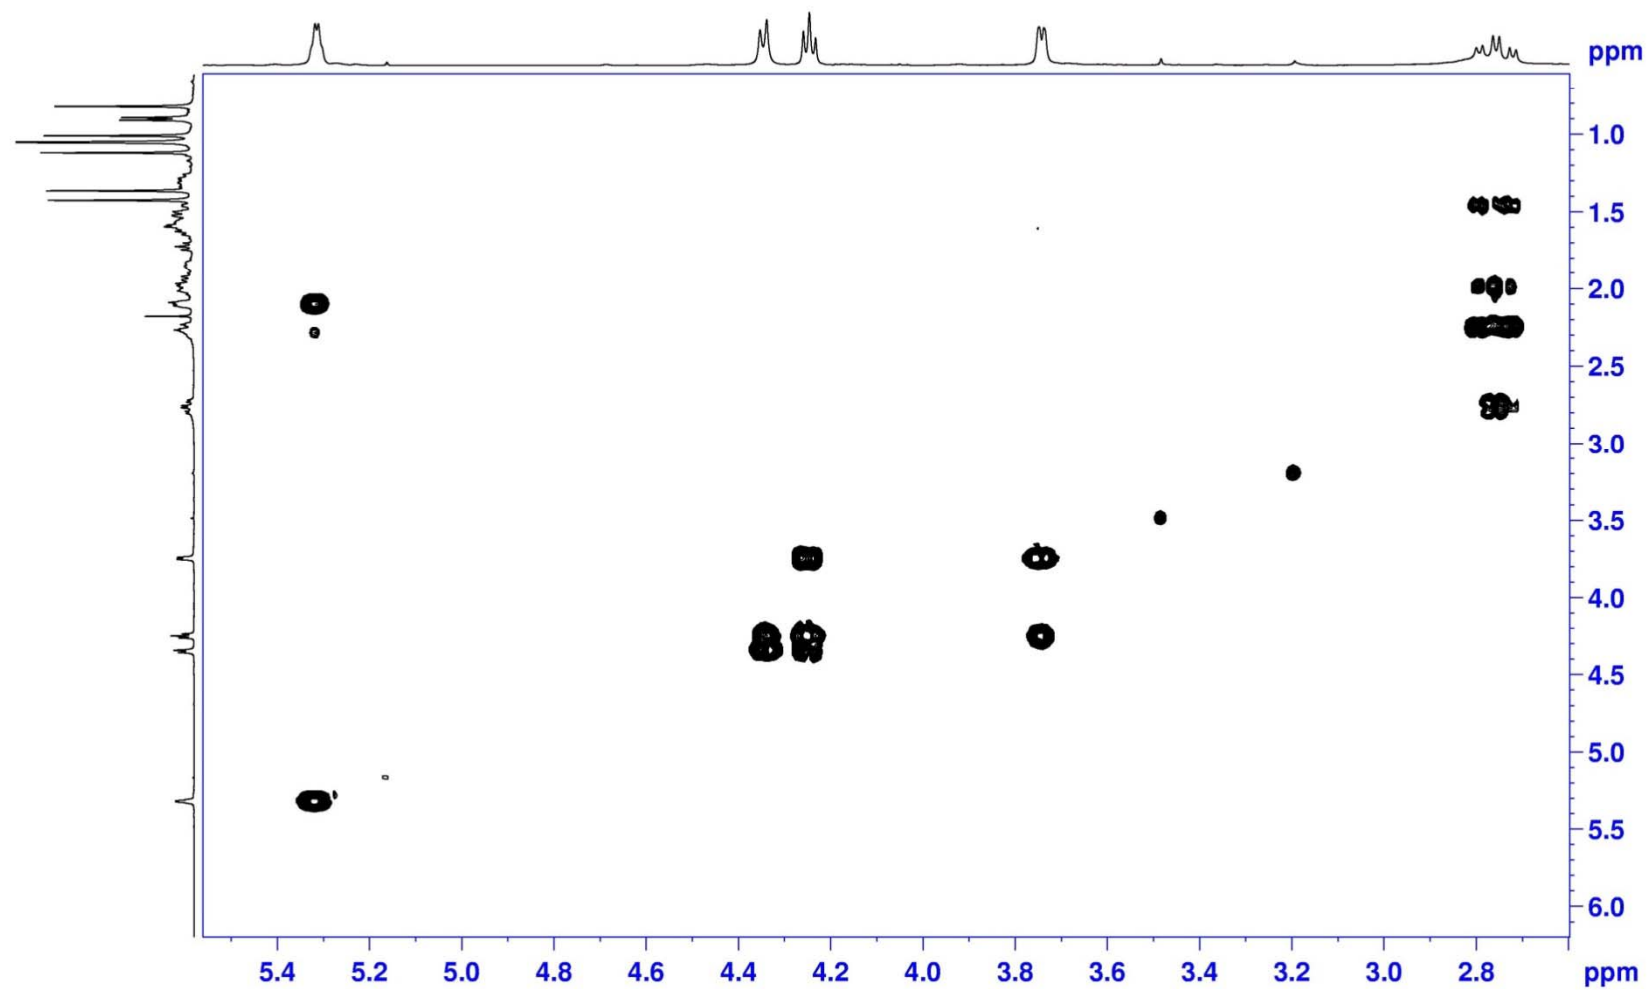

$^1\text{H}$ - $^1\text{H}$  COSY (400 MHz) spectrum of compound **5** in  $\text{CDCl}_3$

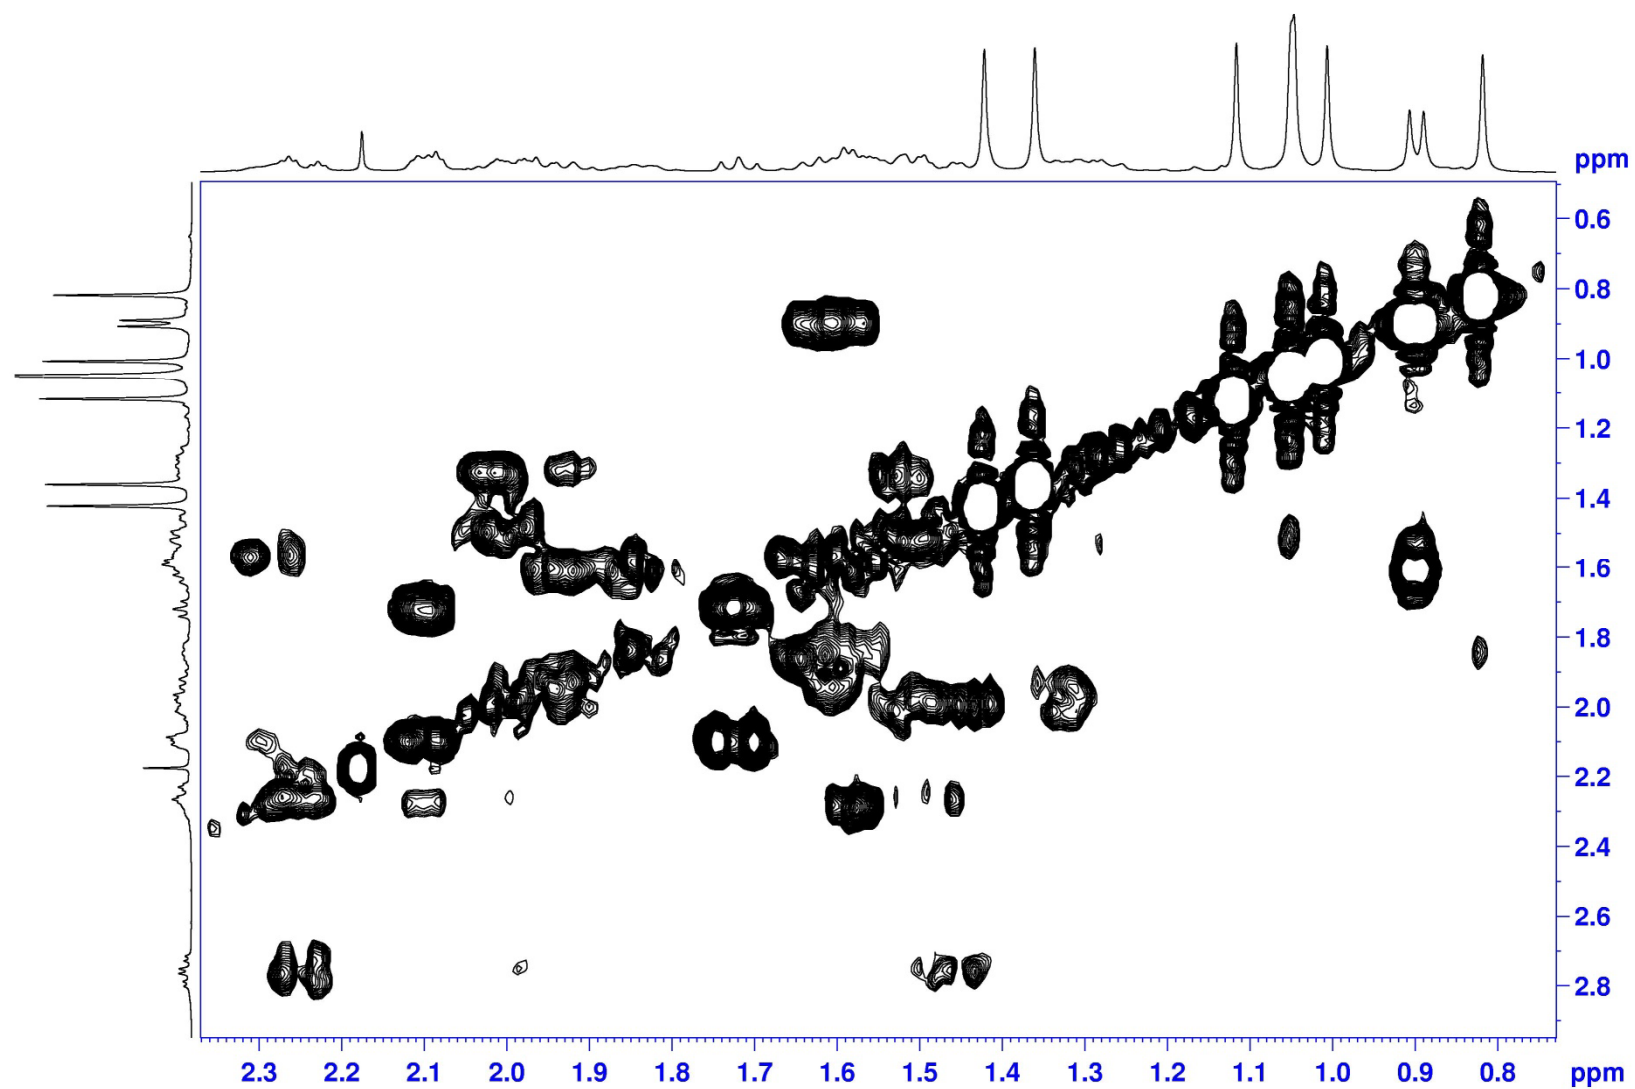

# HSQC (400 MHz) spectrum of compound **5** in CDCl<sub>3</sub>

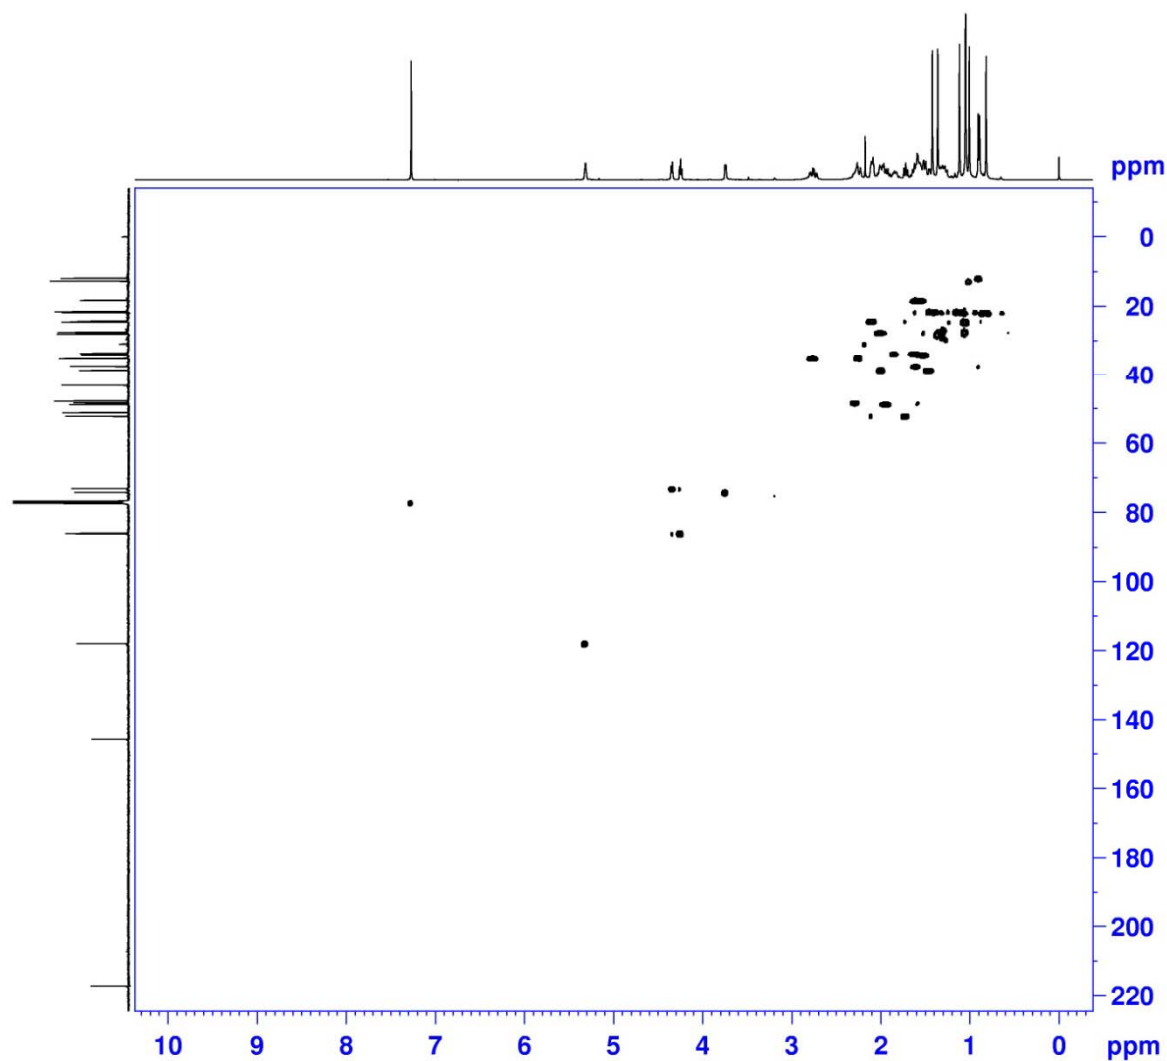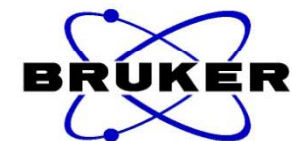

```

NAME           XG-52-4
EXPNO           5
PROCNO          1
Date_           20171226
Time            20.21
INSTRUM         spect
PROBHD          5 mm CPPBBO BB
PULPROG         hsqcetgpsi2
TD              1024
SOLVENT         CDCl3
NS              16
DS              16
SWH             4302.926 Hz
FIDRES          4.202076 Hz
AQ              0.1190388 sec
RG              208.5
DW              116.200 usec
DE              10.00 usec
TE              297.0 K
CNST2           145.0000000
D0              0.00000300 sec
D1              1.46497905 sec
D4              0.00172414 sec
D11             0.03000000 sec
D16             0.00020000 sec
D24             0.00086207 sec
IN0             0.00002080 sec
ZGPTNS
  
```

```

===== CHANNEL f1 =====
SFO1           400.1320007 MHz
NUC1            1H
P1              11.50 usec
P2              23.00 usec
P28             0.00 usec
ND0             2
TD              256
SFO1           100.6233 MHz
FIDRES          93.900238 Hz
SW              238.896 ppm
FnMODE          Echo-Antiecho
SI              1024
SF              400.1300014 MHz
WDW             QSINE
SSB             2
LB              0.00 Hz
GB              0
PC              1.40
SI              1024
MC2             echo-antiecho
SF              100.6127577 MHz
WDW             QSINE
SSB             2
LB              0.00 Hz
GB              0
  
```

HSQC (400 MHz) spectrum of compound **5** in CDCl<sub>3</sub>

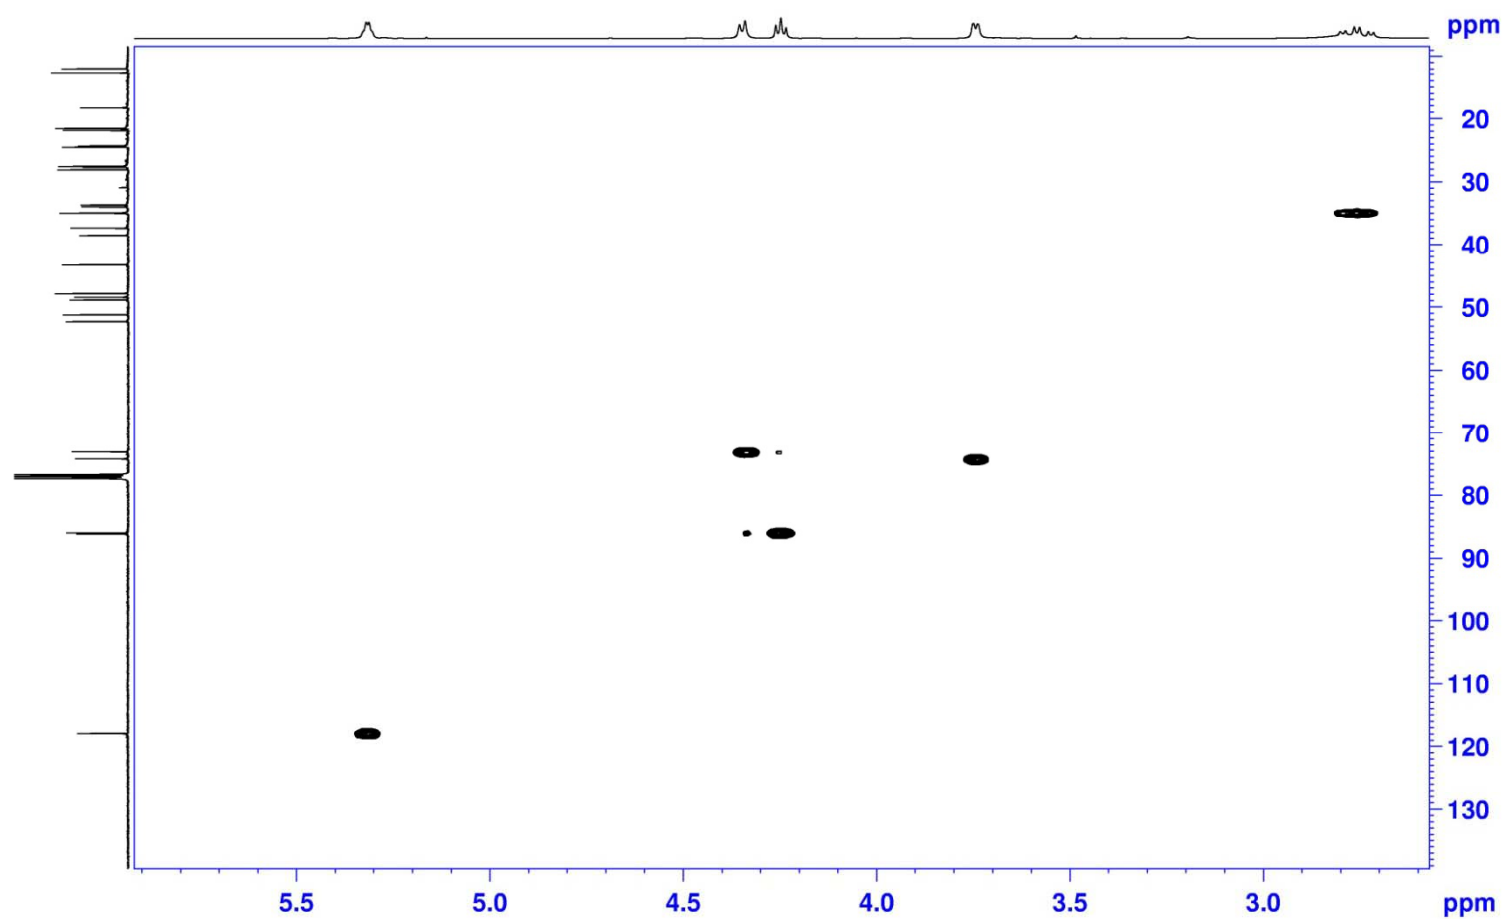

HSQC (400 MHz) spectrum of compound **5** in CDCl<sub>3</sub>

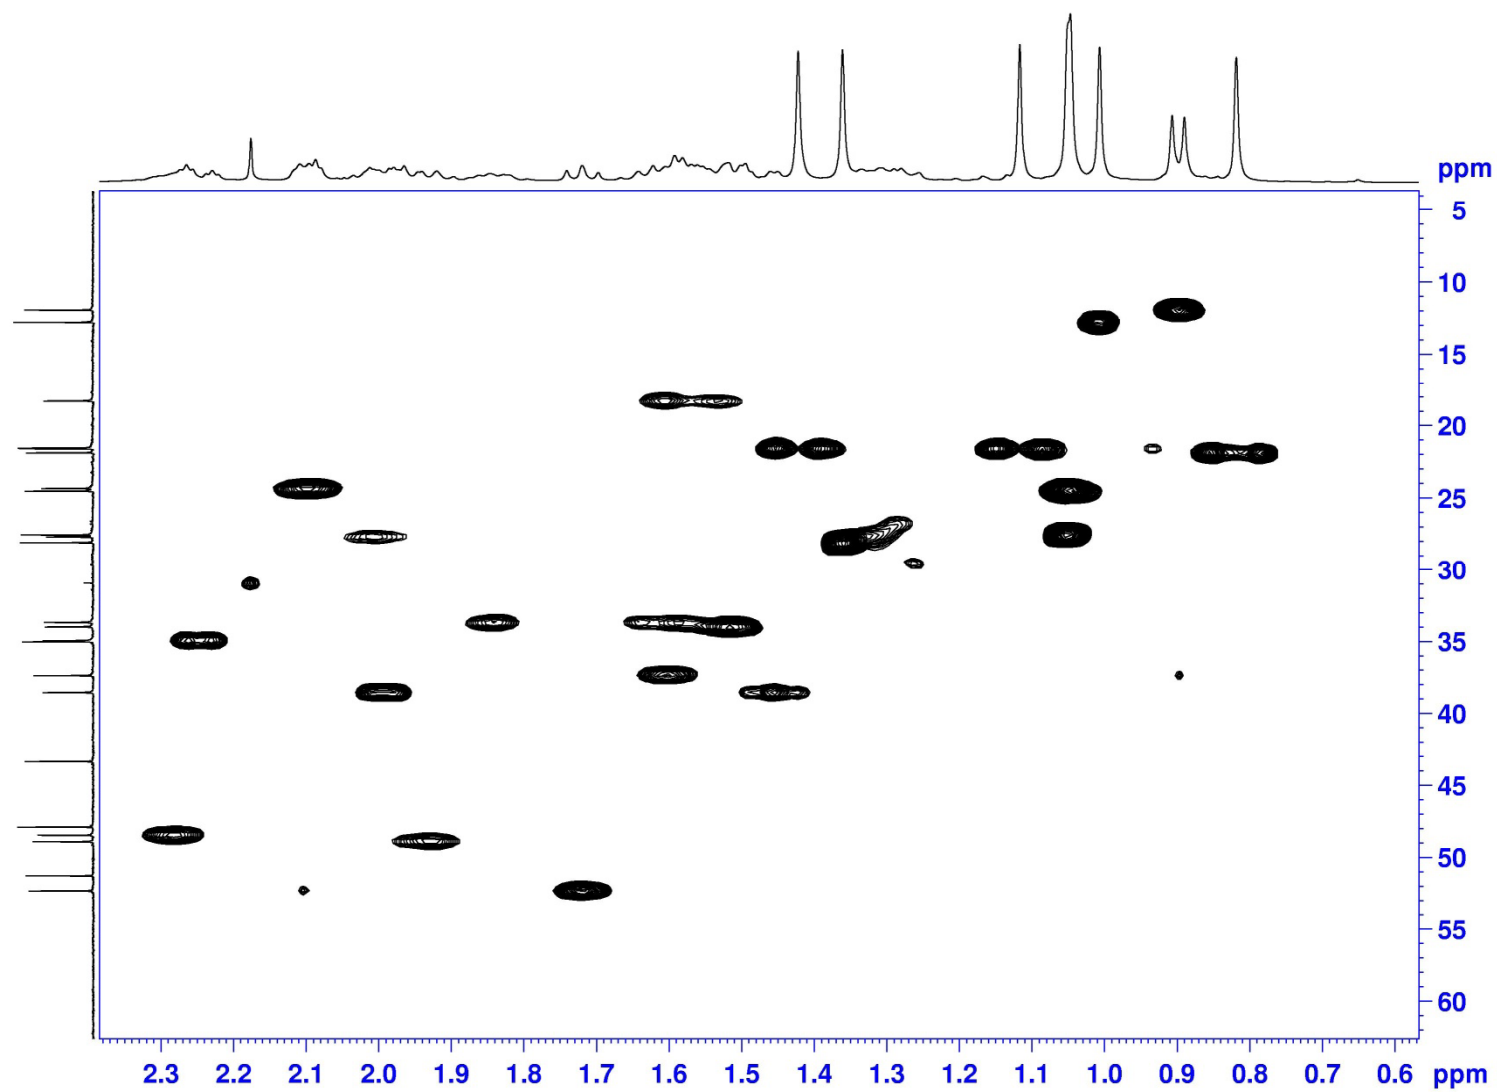

# HMBC (400 MHz) spectrum of compound **5** in CDCl<sub>3</sub>

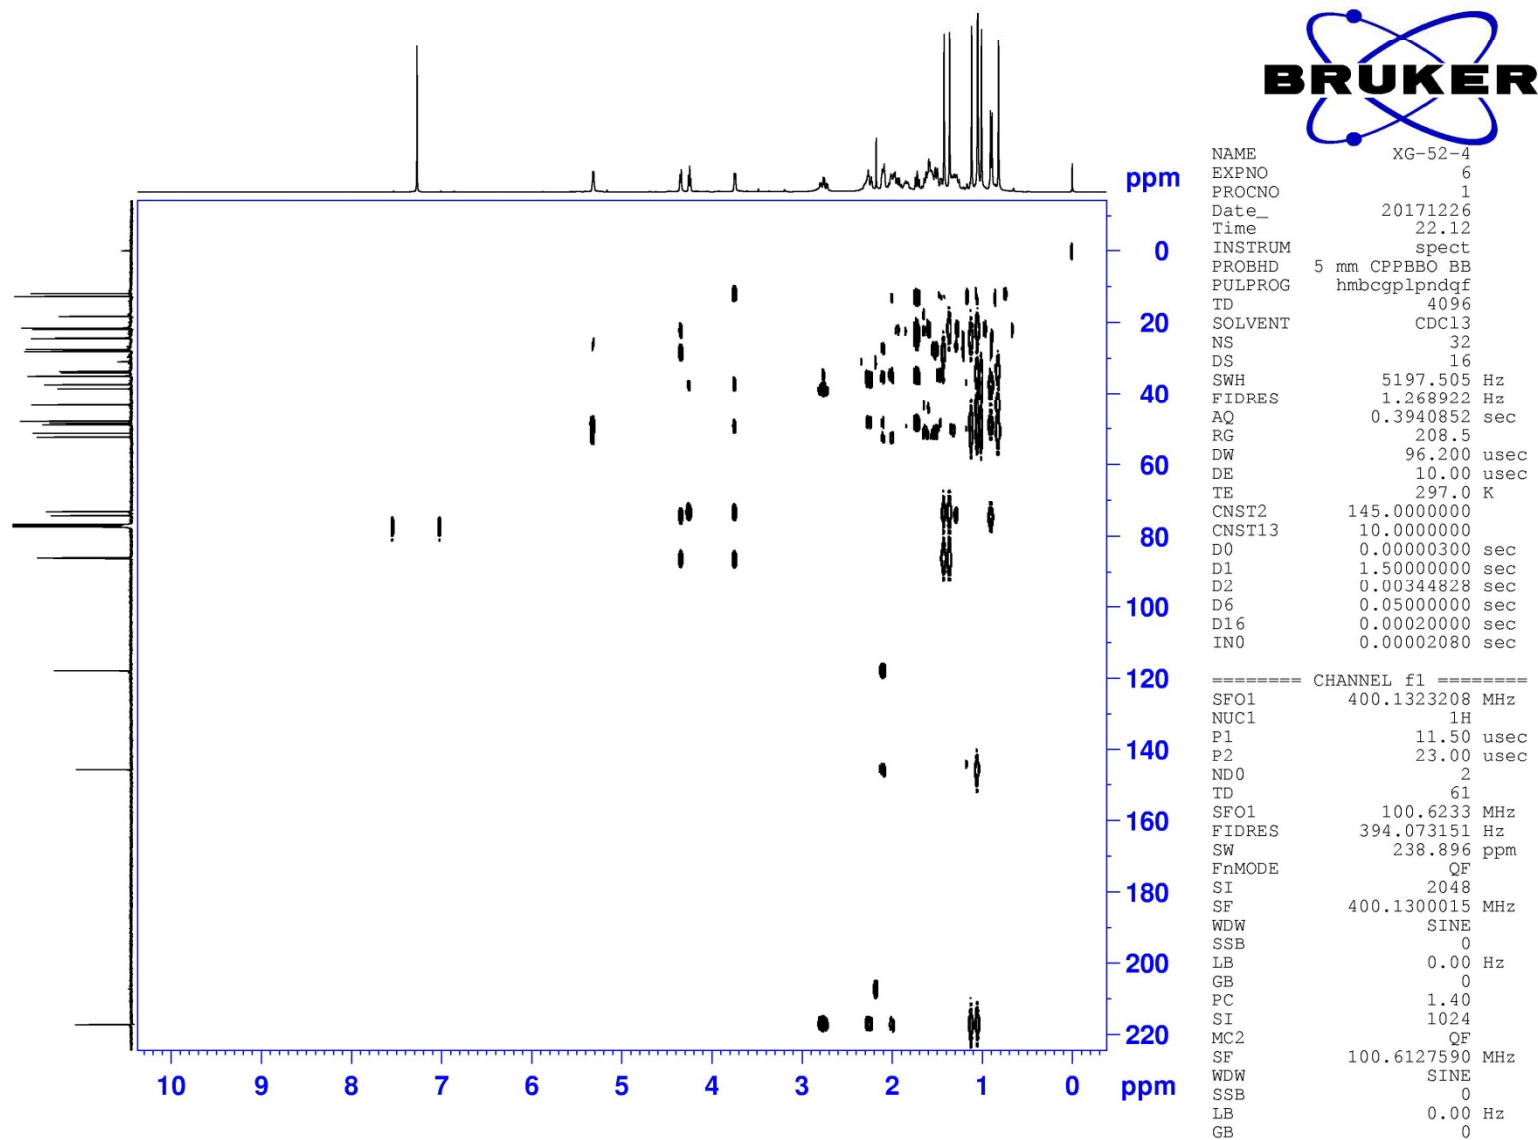

HMBC (400 MHz) spectrum of compound **5** in CDCl<sub>3</sub>

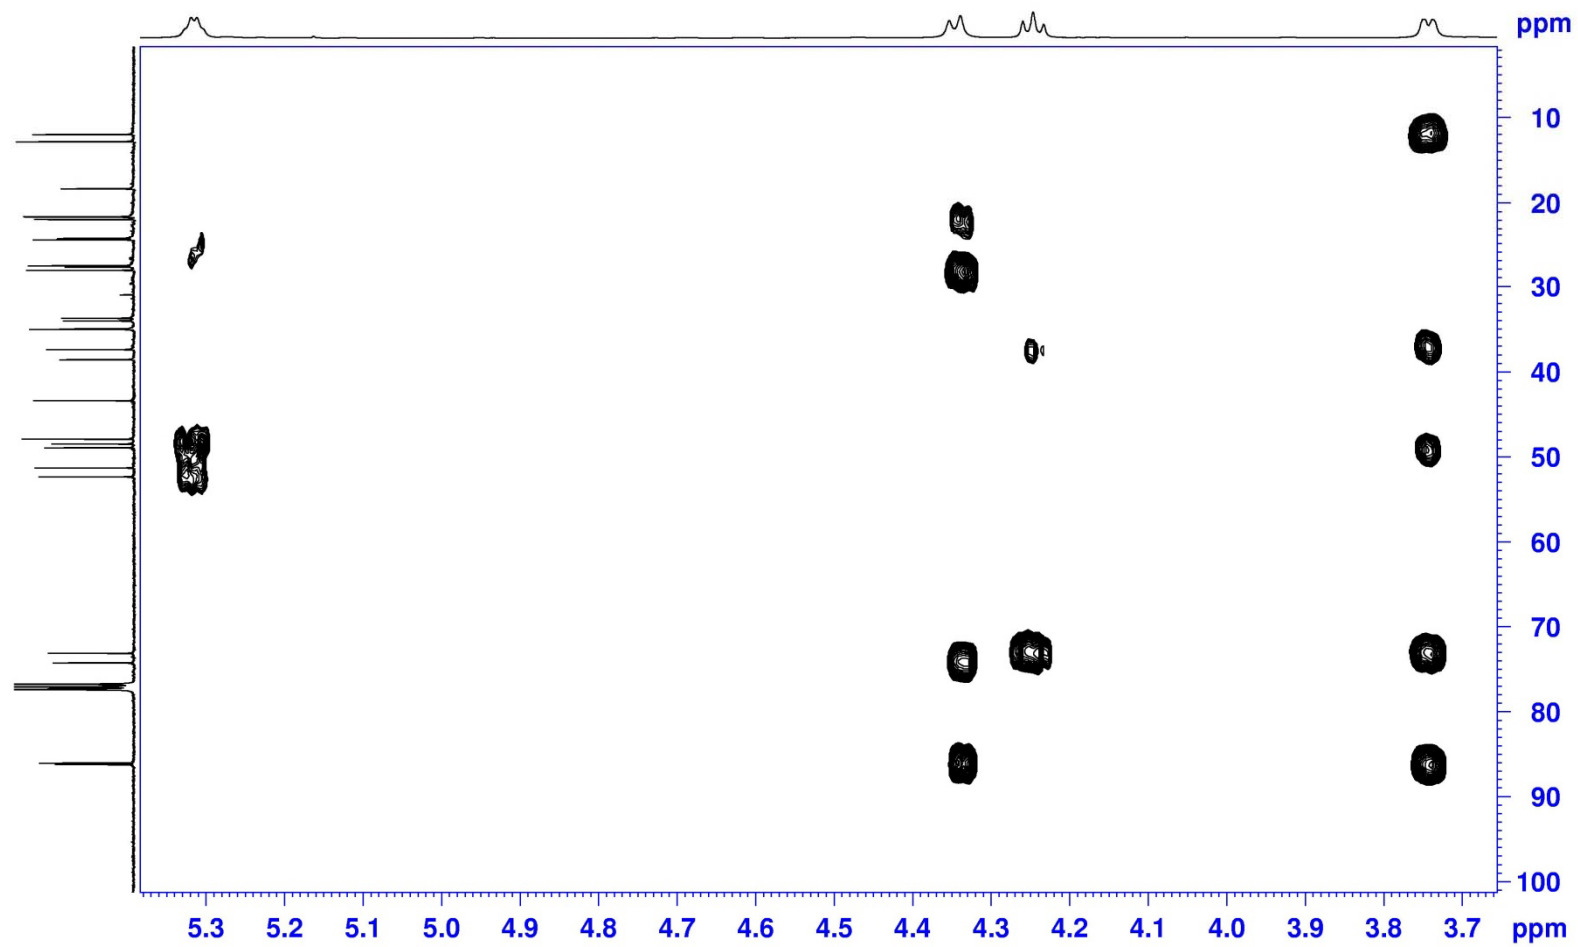

HMBC (400 MHz) spectrum of compound **5** in CDCl<sub>3</sub>

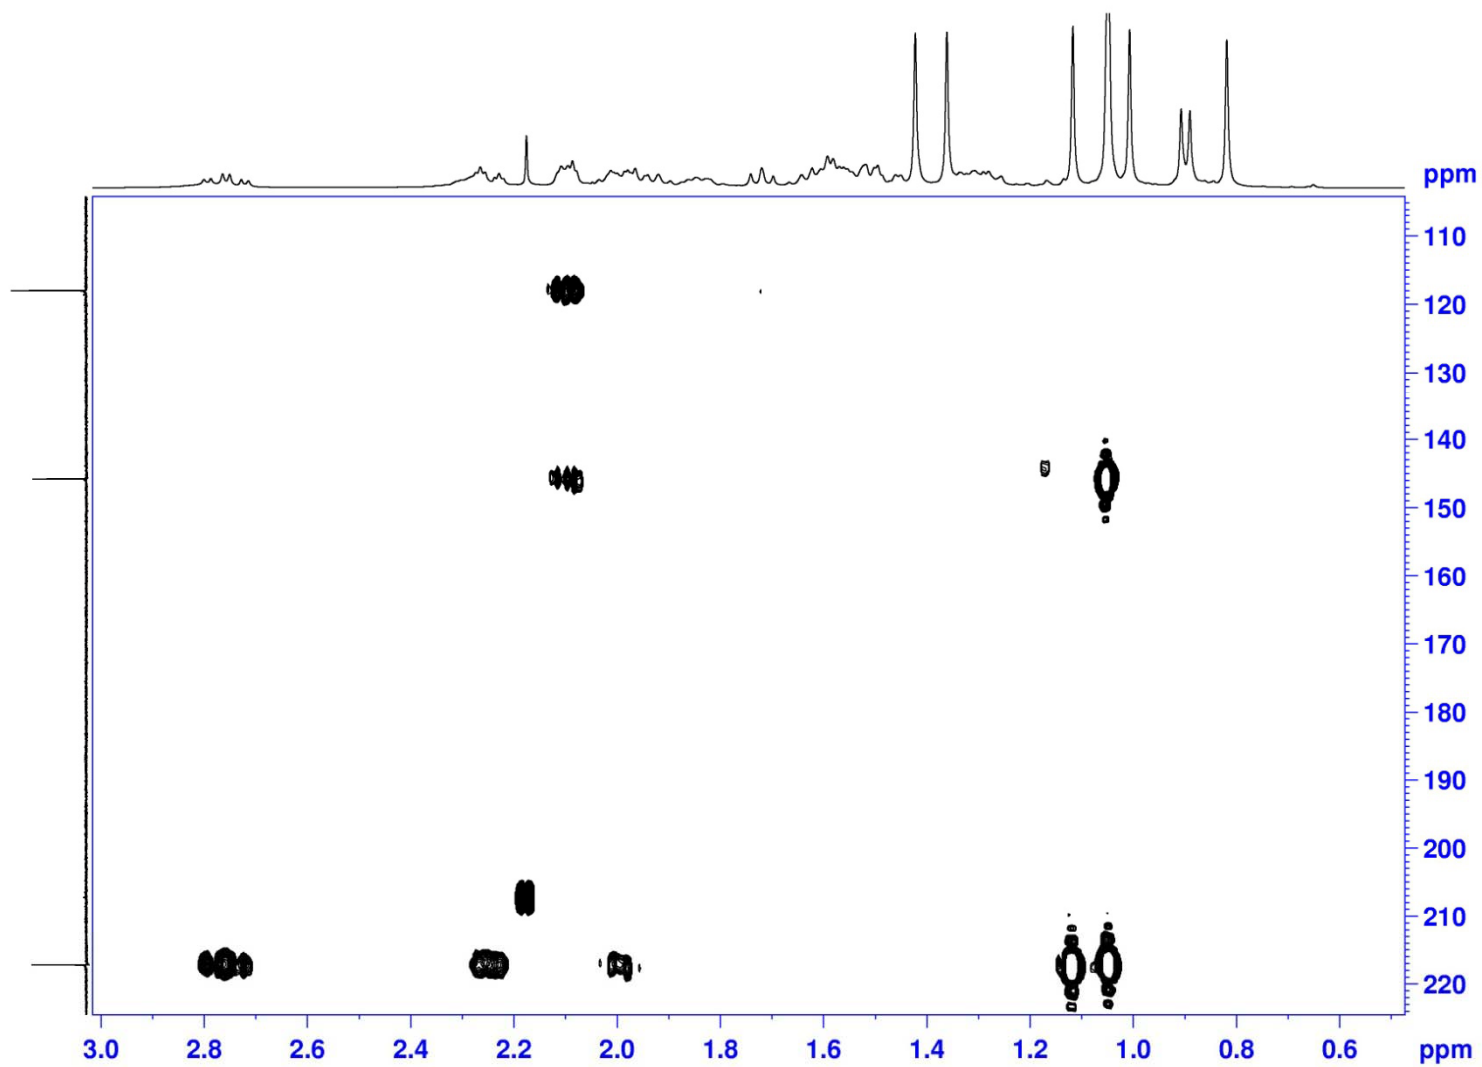



HMBC (400 MHz) spectrum of compound **5** in CDCl<sub>3</sub>

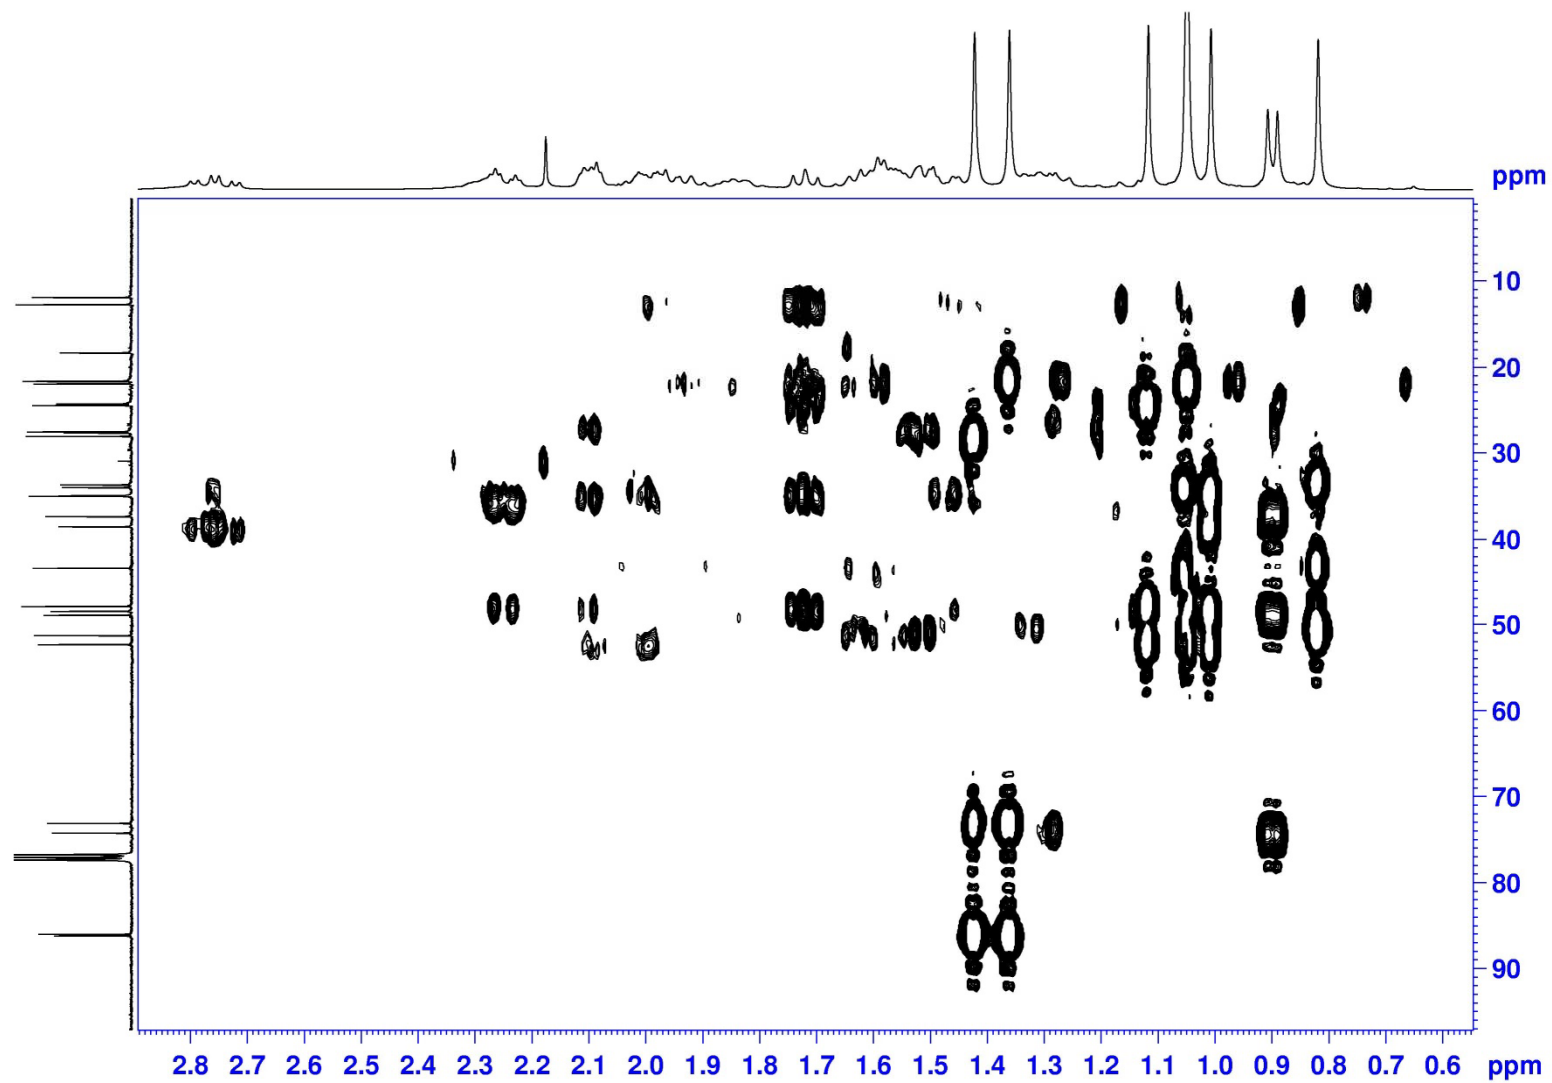

HMBC (400 MHz) spectrum of compound **5** in CDCl<sub>3</sub>

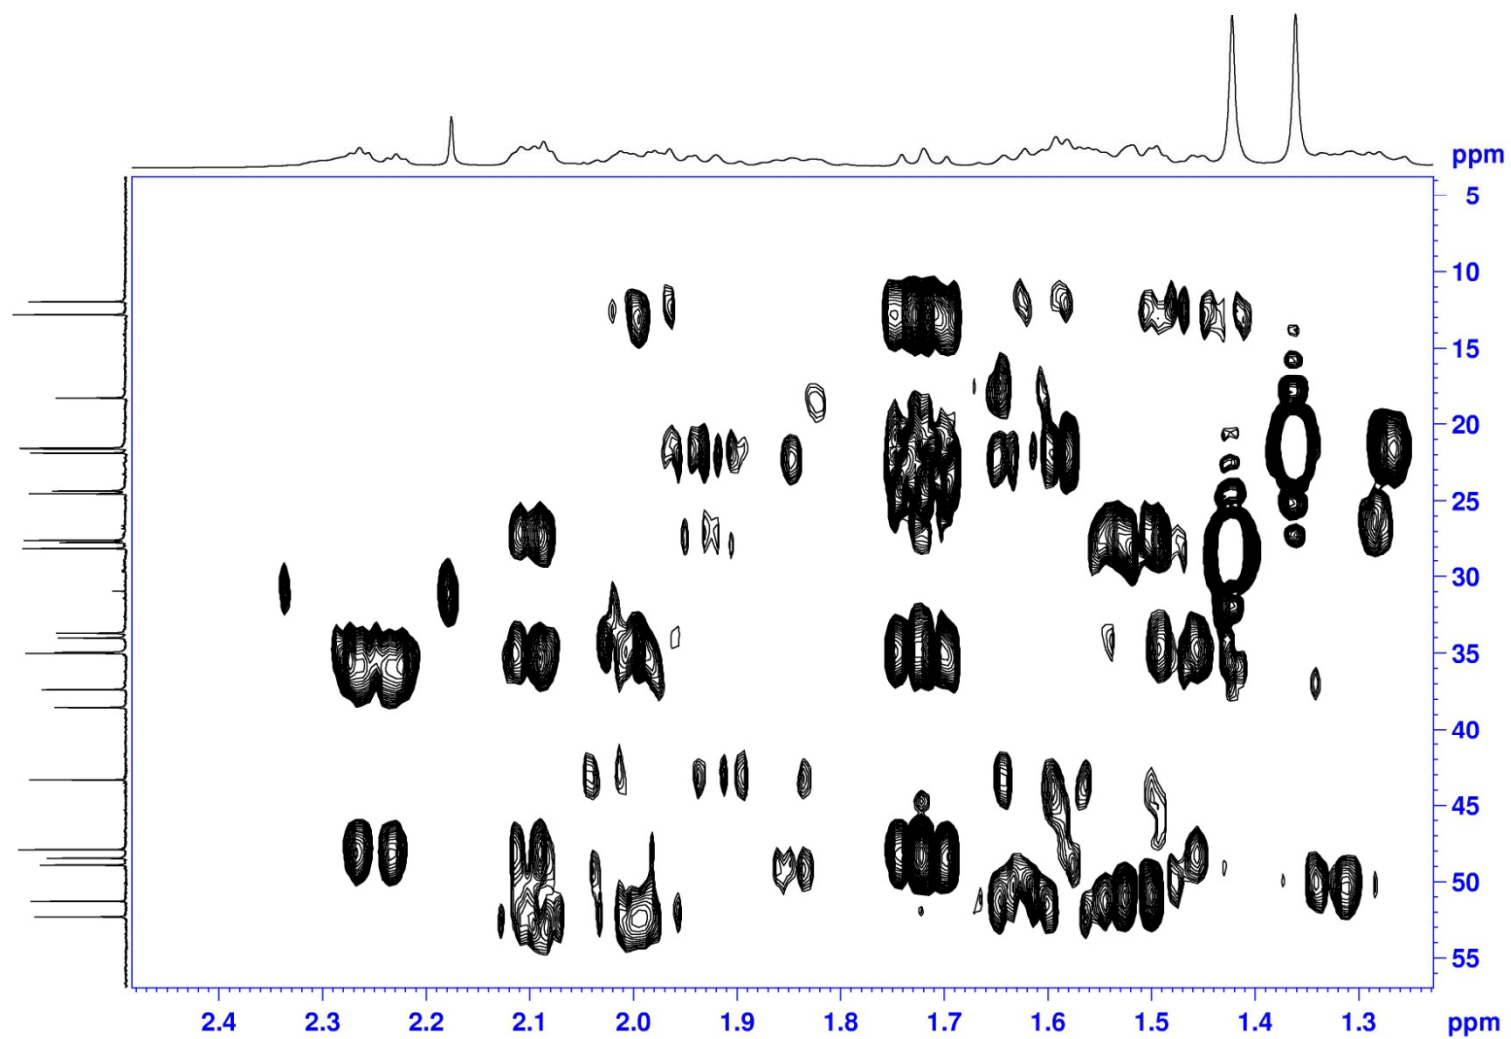

HMBC (400 MHz) spectrum of compound **5** in CDCl<sub>3</sub>

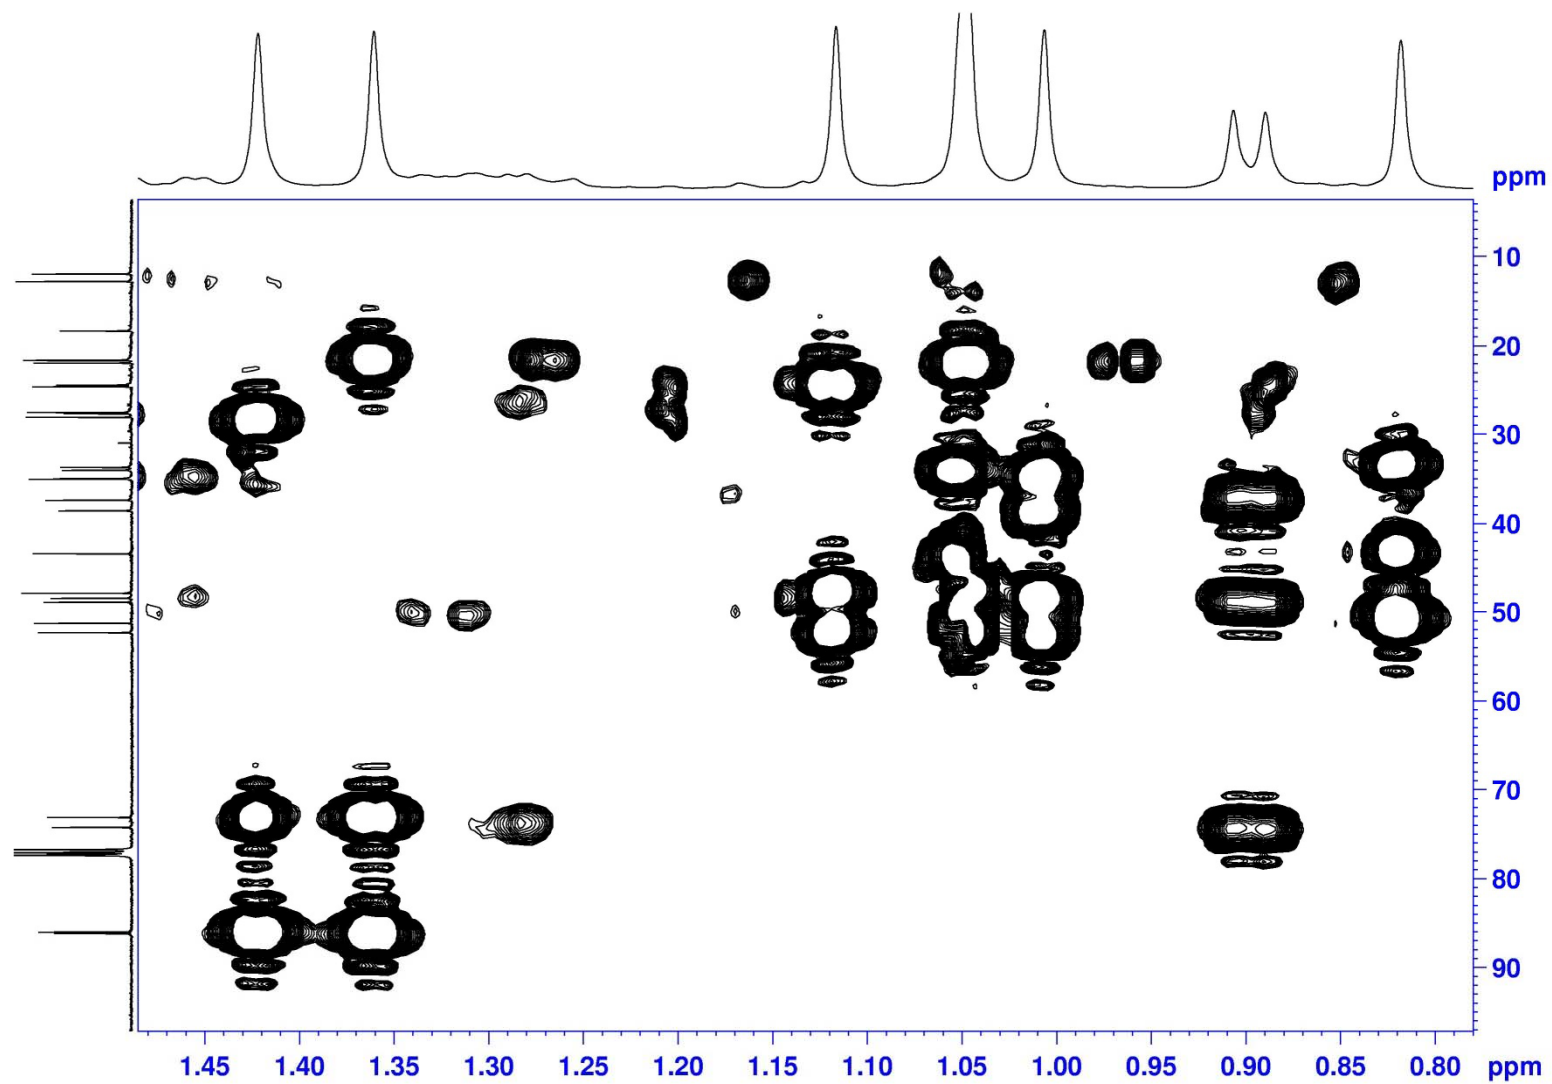

# NOESY (400 MHz) spectrum of compound **5** in CDCl<sub>3</sub>

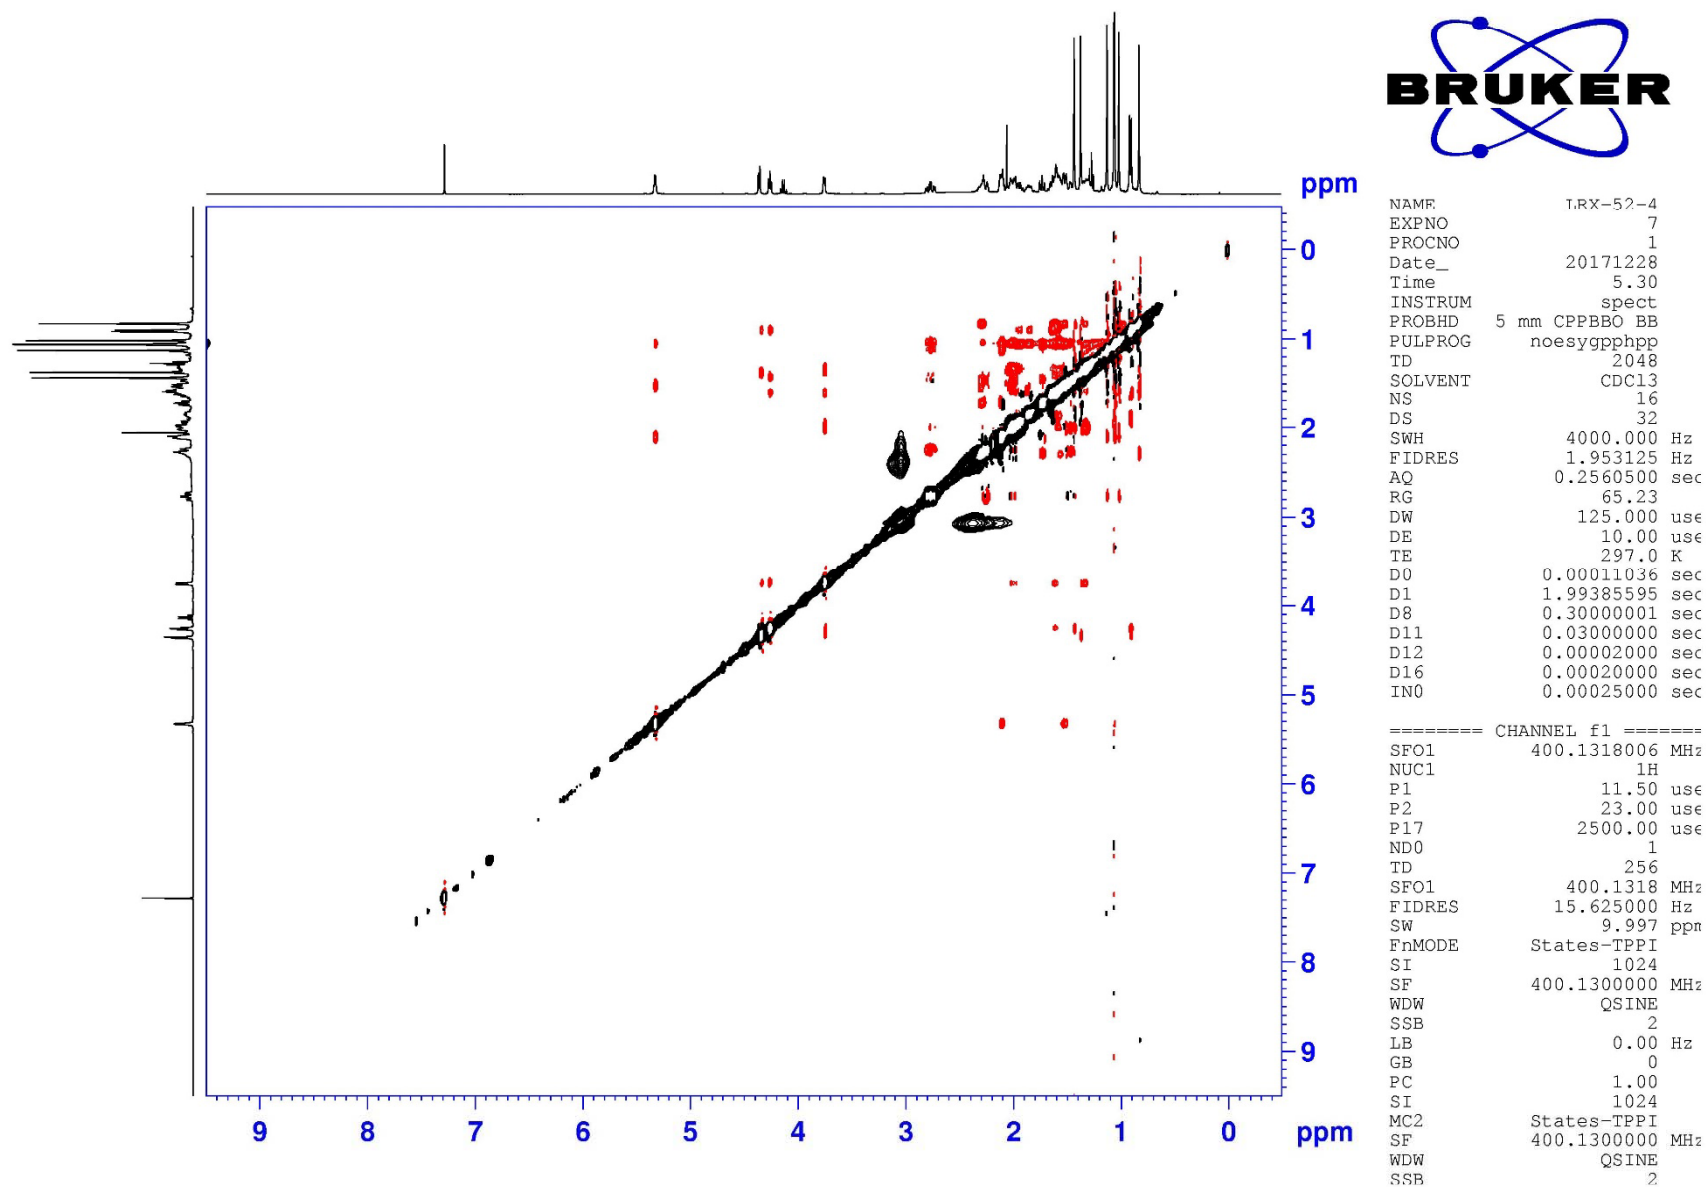

NOESY (400 MHz) spectrum of compound **5** in  $\text{CDCl}_3$

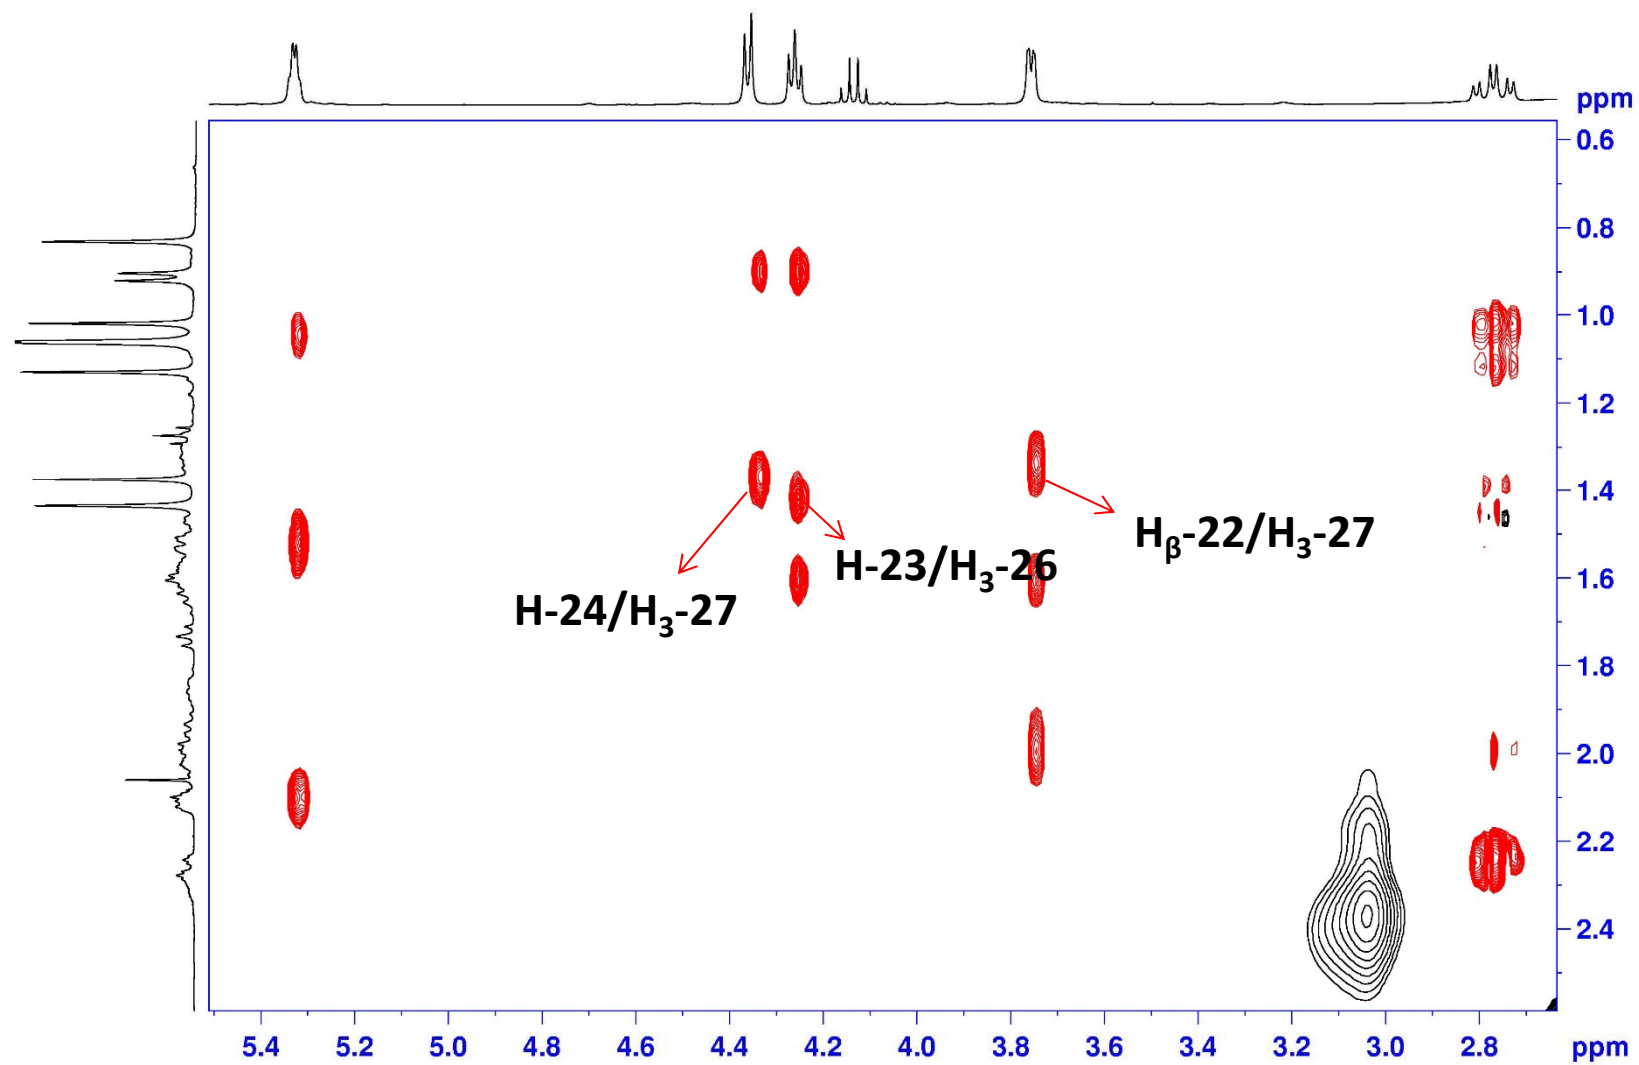

NOESY (400 MHz) spectrum of compound **5** in  $\text{CDCl}_3$

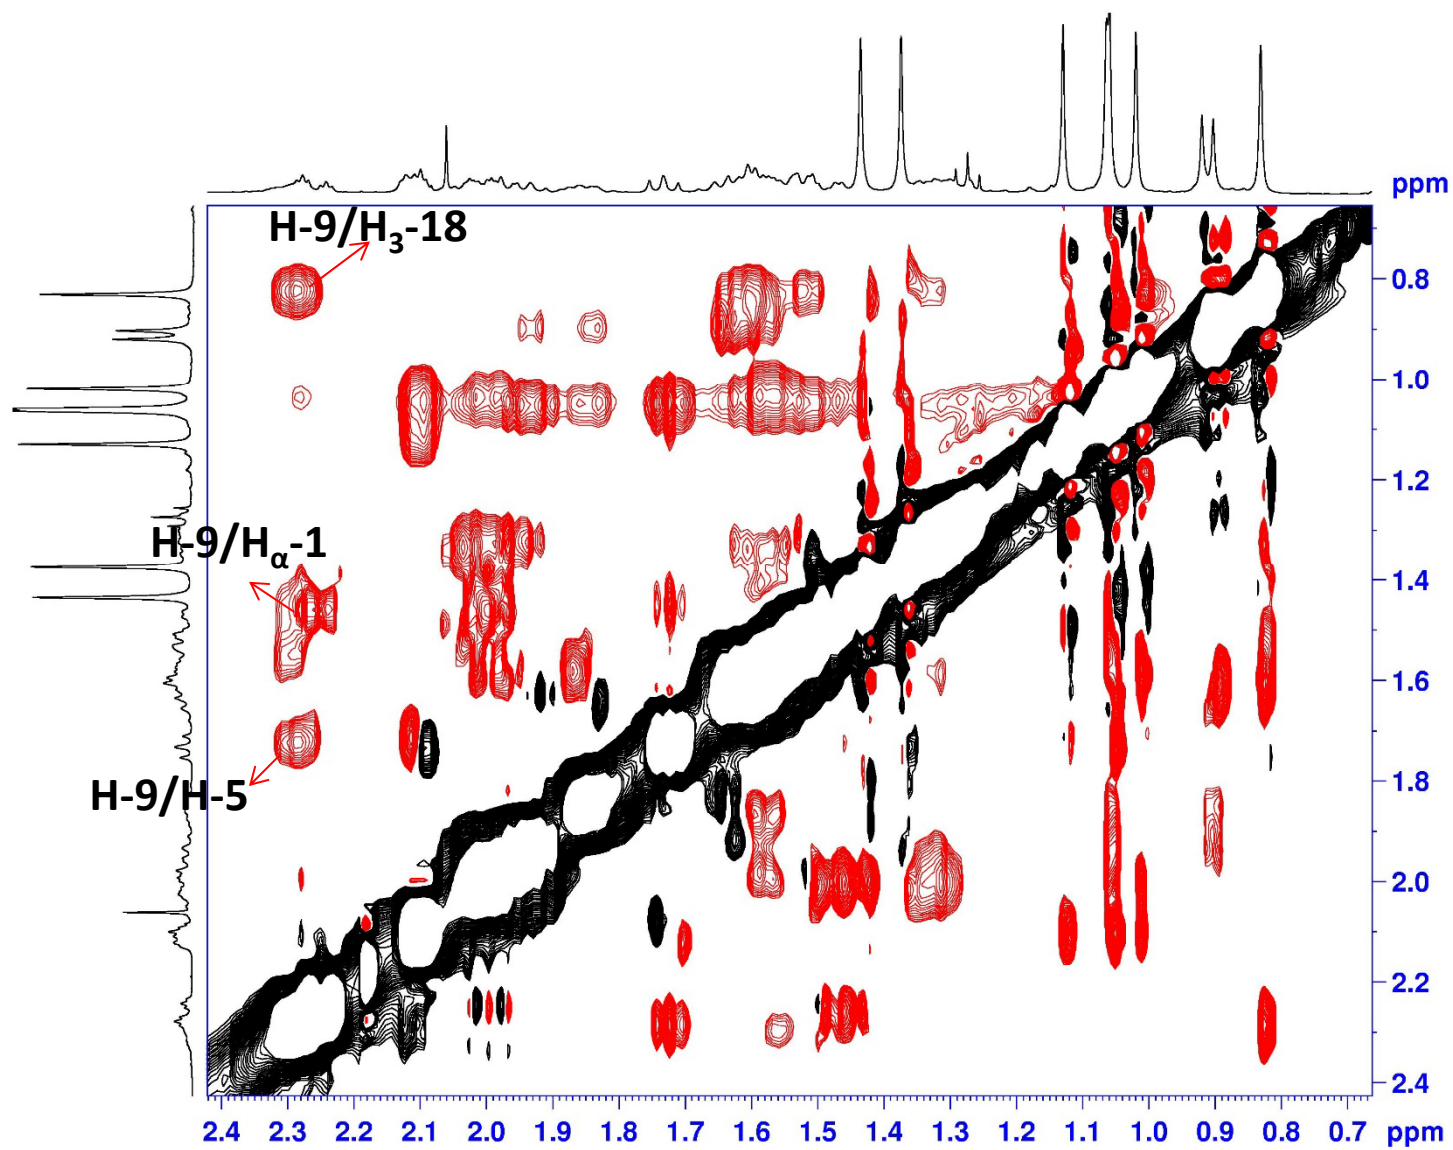

NOESY (400 MHz) spectrum of compound **5** in CDCl<sub>3</sub>

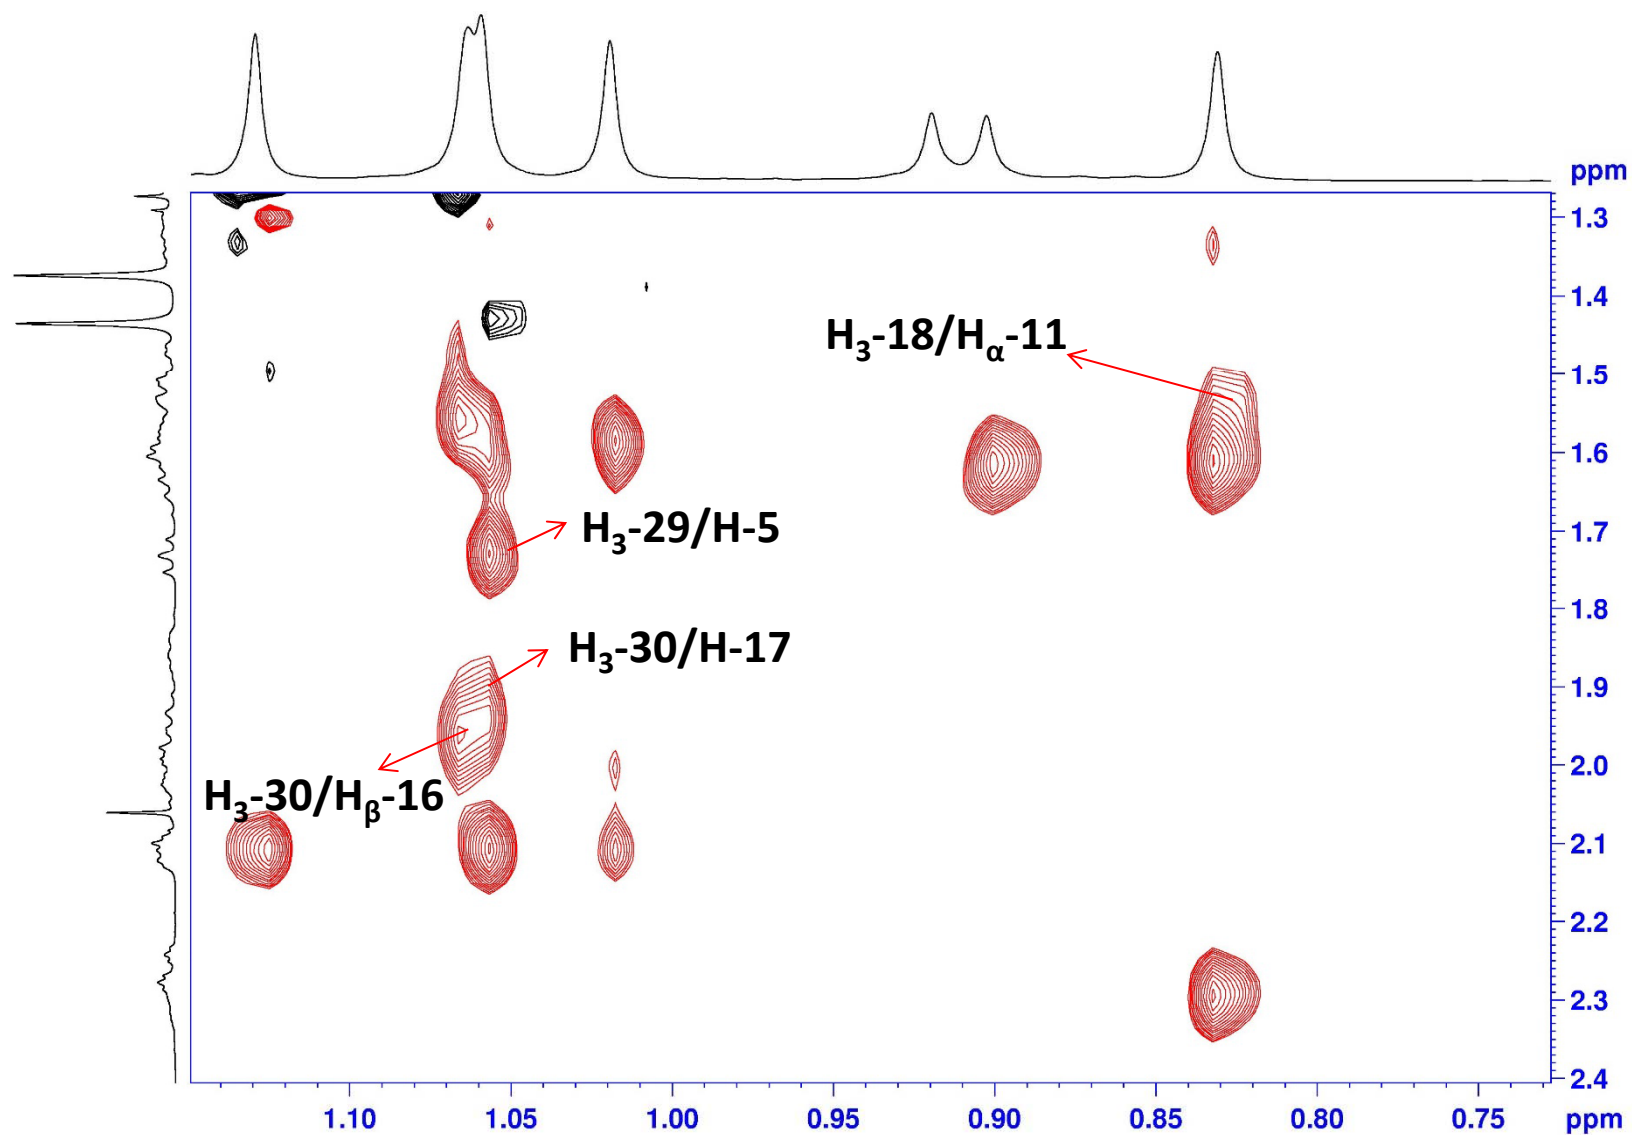



# HR-ESIMS for compound 6

## Generic Display Report

### Analysis Info

Analysis Name D:\Data\MS\data\201612\liwanshan\_EA-16\_pos\_25\_01\_2825.d  
Method LC\_DirectInfusion\_pos\_70-500mz.m  
Sample Name liwanshan\_EA-16\_pos  
Comment

Acquisition Date 12/21/2016 4:51:43 PM

Operator  
Instrument

SCSIO  
maXis

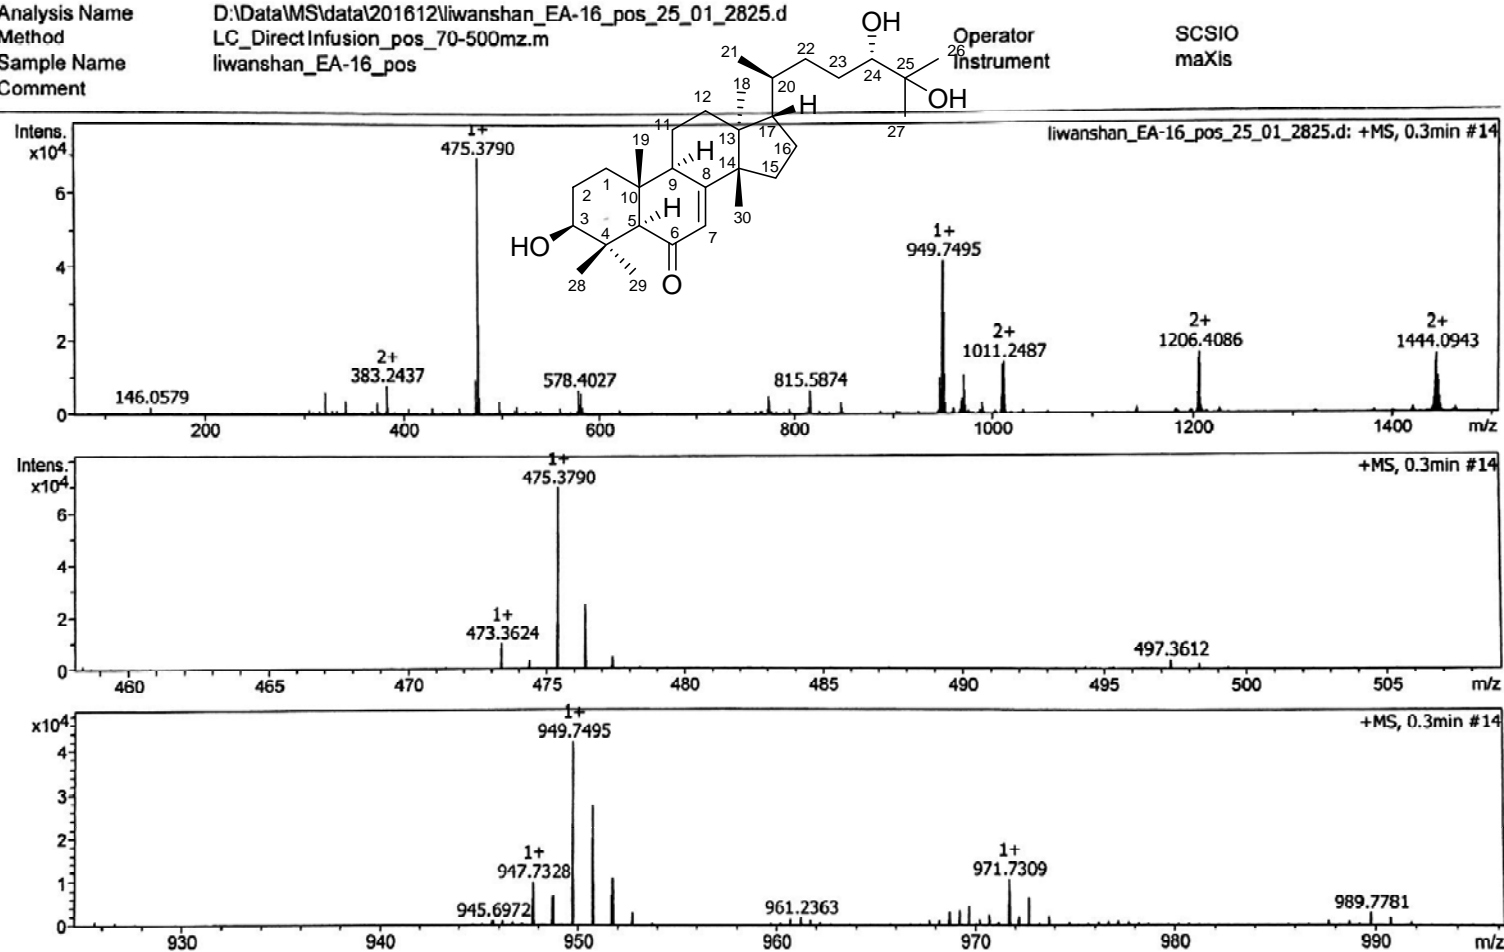



# HR-ESIMS for compound 6

## Mass Spectrum SmartFormula Report

### Analysis Info

Analysis Name D:\Data\MS\data\201612\liwanshan\_EA-16\_pos\_25\_01\_2825.d  
 Method LC\_Direct Infusion\_pos\_70-500mz.m  
 Sample Name liwanshan\_EA-16\_pos  
 Comment

Acquisition Date 12/21/2016 4:51:43 PM  
 Operator SCSIO  
 Instrument maXis 255552.00029

### Acquisition Parameter

|             |          |                      |          |                  |           |
|-------------|----------|----------------------|----------|------------------|-----------|
| Source Type | ESI      | Ion Polarity         | Positive | Set Nebulizer    | 0.4 Bar   |
| Focus       | Active   | Set Capillary        | 4500 V   | Set Dry Heater   | 180 °C    |
| Scan Begin  | 70 m/z   | Set End Plate Offset | -500 V   | Set Dry Gas      | 4.0 l/min |
| Scan End    | 1500 m/z | Set Charging Voltage | 0 V      | Set Divert Valve | Waste     |
|             |          | Set Corona           | 0 nA     | Set APCI Heater  | 0 °C      |

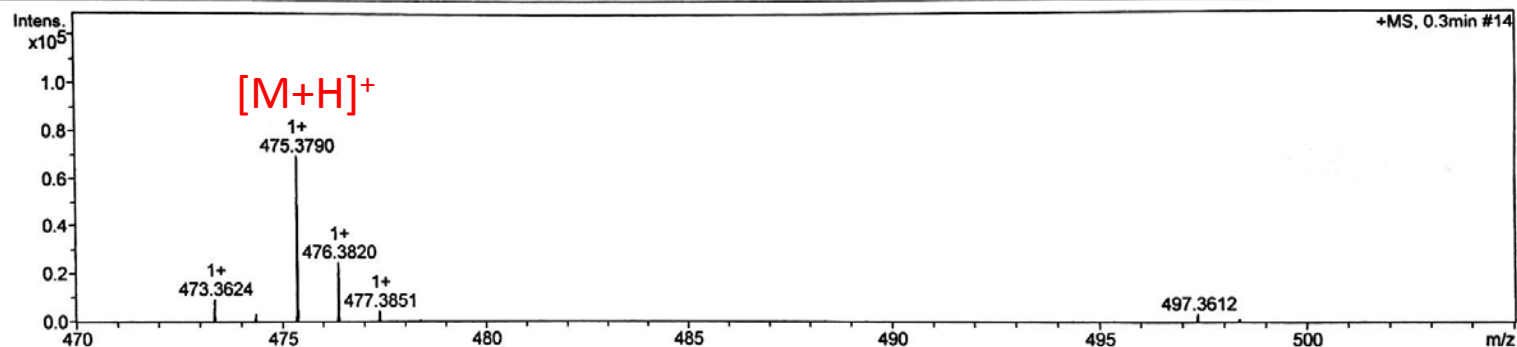

| Meas. m/z  | # | Ion Formula | Score  | m/z        | err [ppm] | err [mDa] | mSigma | rdb  | e <sup>-</sup> Conf | N-Rule |
|------------|---|-------------|--------|------------|-----------|-----------|--------|------|---------------------|--------|
| 475.379013 | 1 | C30H51O4    | 100.00 | 475.378187 | -1.7      | -0.8      | 10.7   | 5.5  | even                | ok     |
| 497.361200 | 1 | C30H50NaO4  | 100.00 | 497.360131 | 2.2       | 1.1       | 29.1   | 5.5  | even                | ok     |
| 949.749455 | 1 | C60H101O8   | 100.00 | 949.749097 | -0.4      | -0.4      | 12.2   | 10.5 | even                | ok     |
| 971.730887 | 1 | C60H100NaO8 | 100.00 | 971.731041 | -0.2      | -0.2      | 30.2   | 10.5 | even                | ok     |

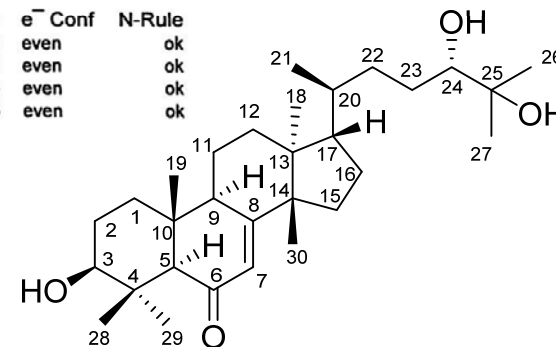

$^1\text{H}$  NMR (400 MHz) spectrum of compound **6** in  $\text{CDCl}_3$

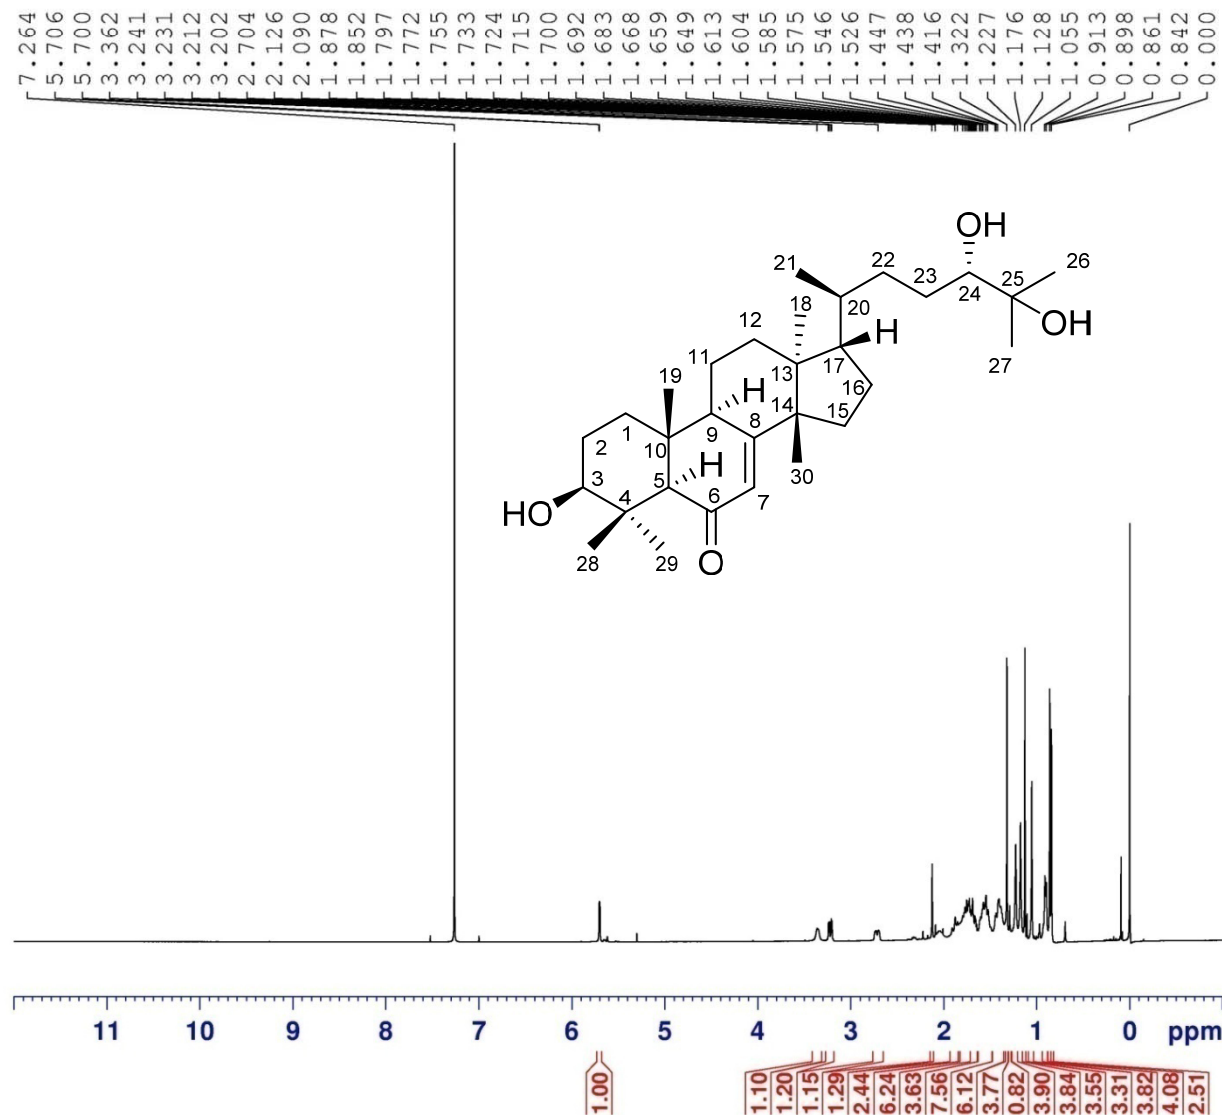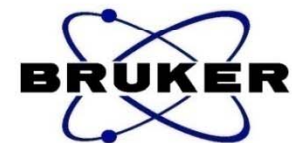

```

NAME          EA-16
EXPNO         1
PROCNO        1
Date_         20160726
Time          12.48
INSTRUM       spect
PROBHD        5 mm CPPBBO BB
PULPROG       zg30
TD            65536
SOLVENT       CDCl3
NS            16
DS            2
SWH           8223.685 Hz
FIDRES        0.125483 Hz
AQ            3.9846387 sec
RG            102.3
DW            60.800 usec
DE            10.00 usec
TE            297.0 K
D1            1.00000000 sec
TD0           1

===== CHANNEL f1 =====
SF01          400.1324710 MHz
NUC1           1H
P1             11.50 usec
SI            65536
SF            400.1300079 MHz
WDW            EM
SSB            0
LB             0.30 Hz
GB            0
PC             1.00
    
```

$^1\text{H}$  NMR (400 MHz) spectrum of compound **6** in  $\text{CDCl}_3$

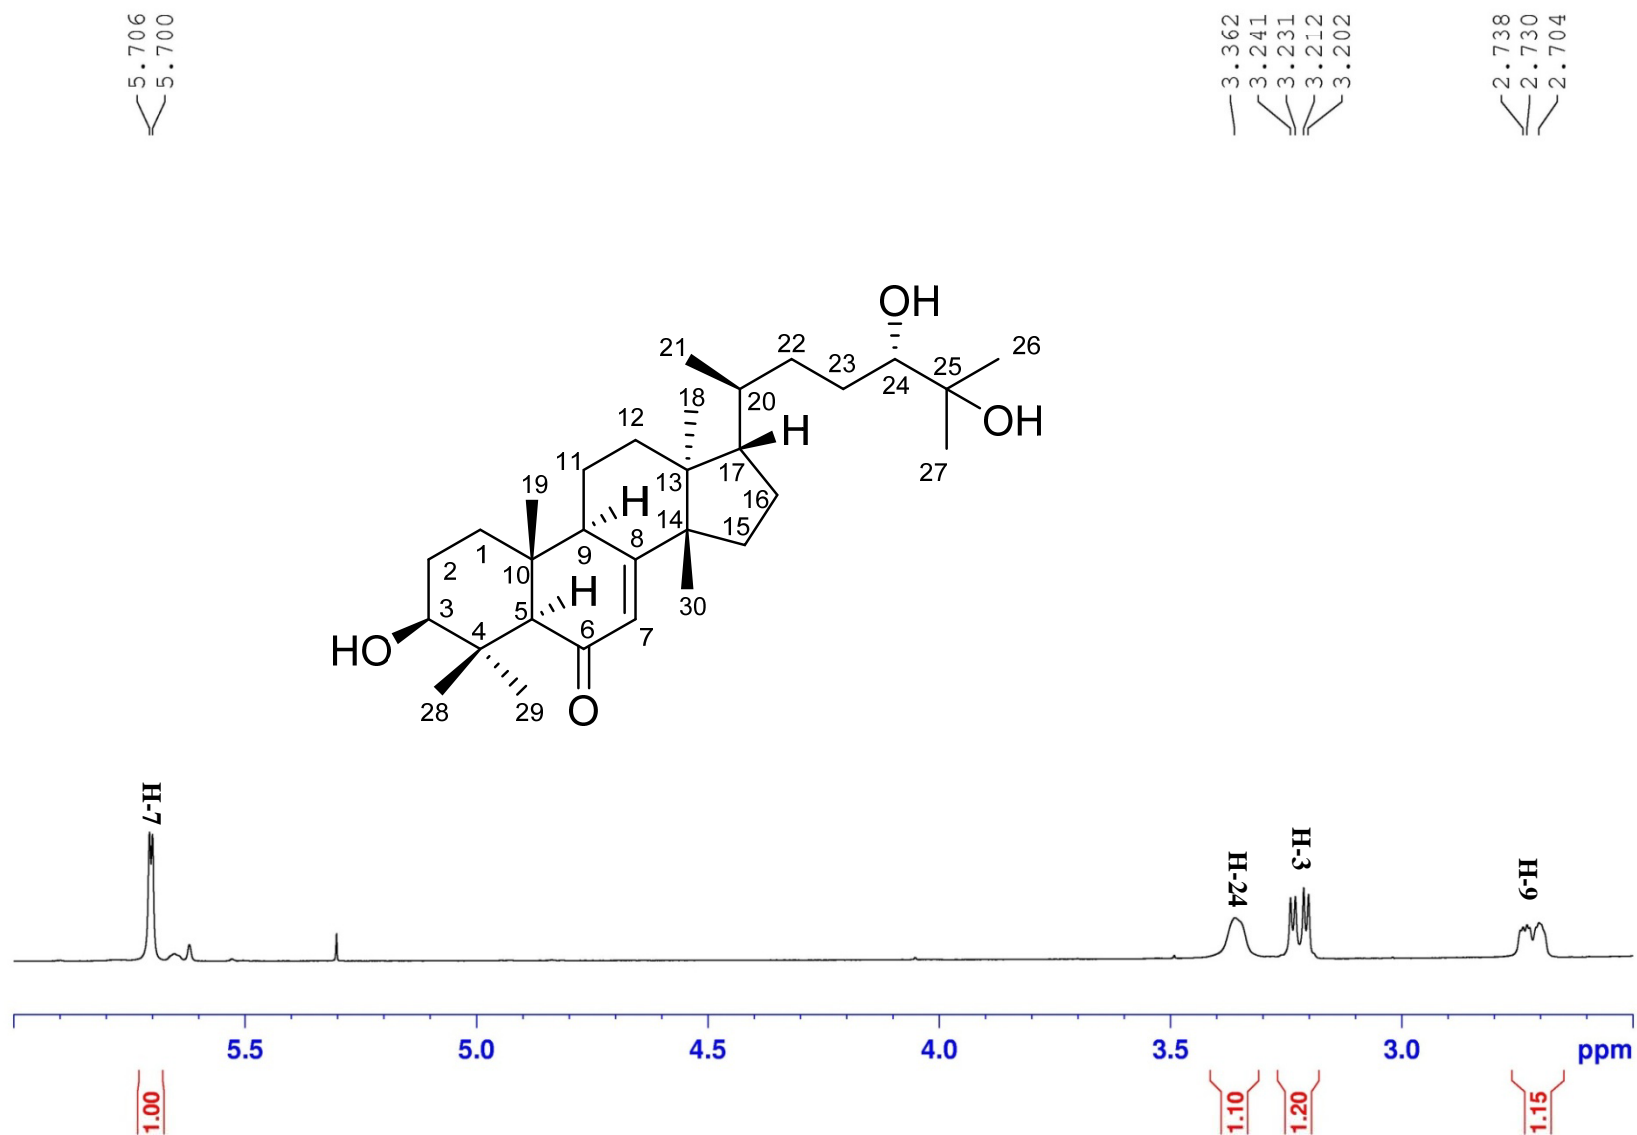

$^1\text{H}$  NMR (400 MHz) spectrum of compound **6** in  $\text{CDCl}_3$

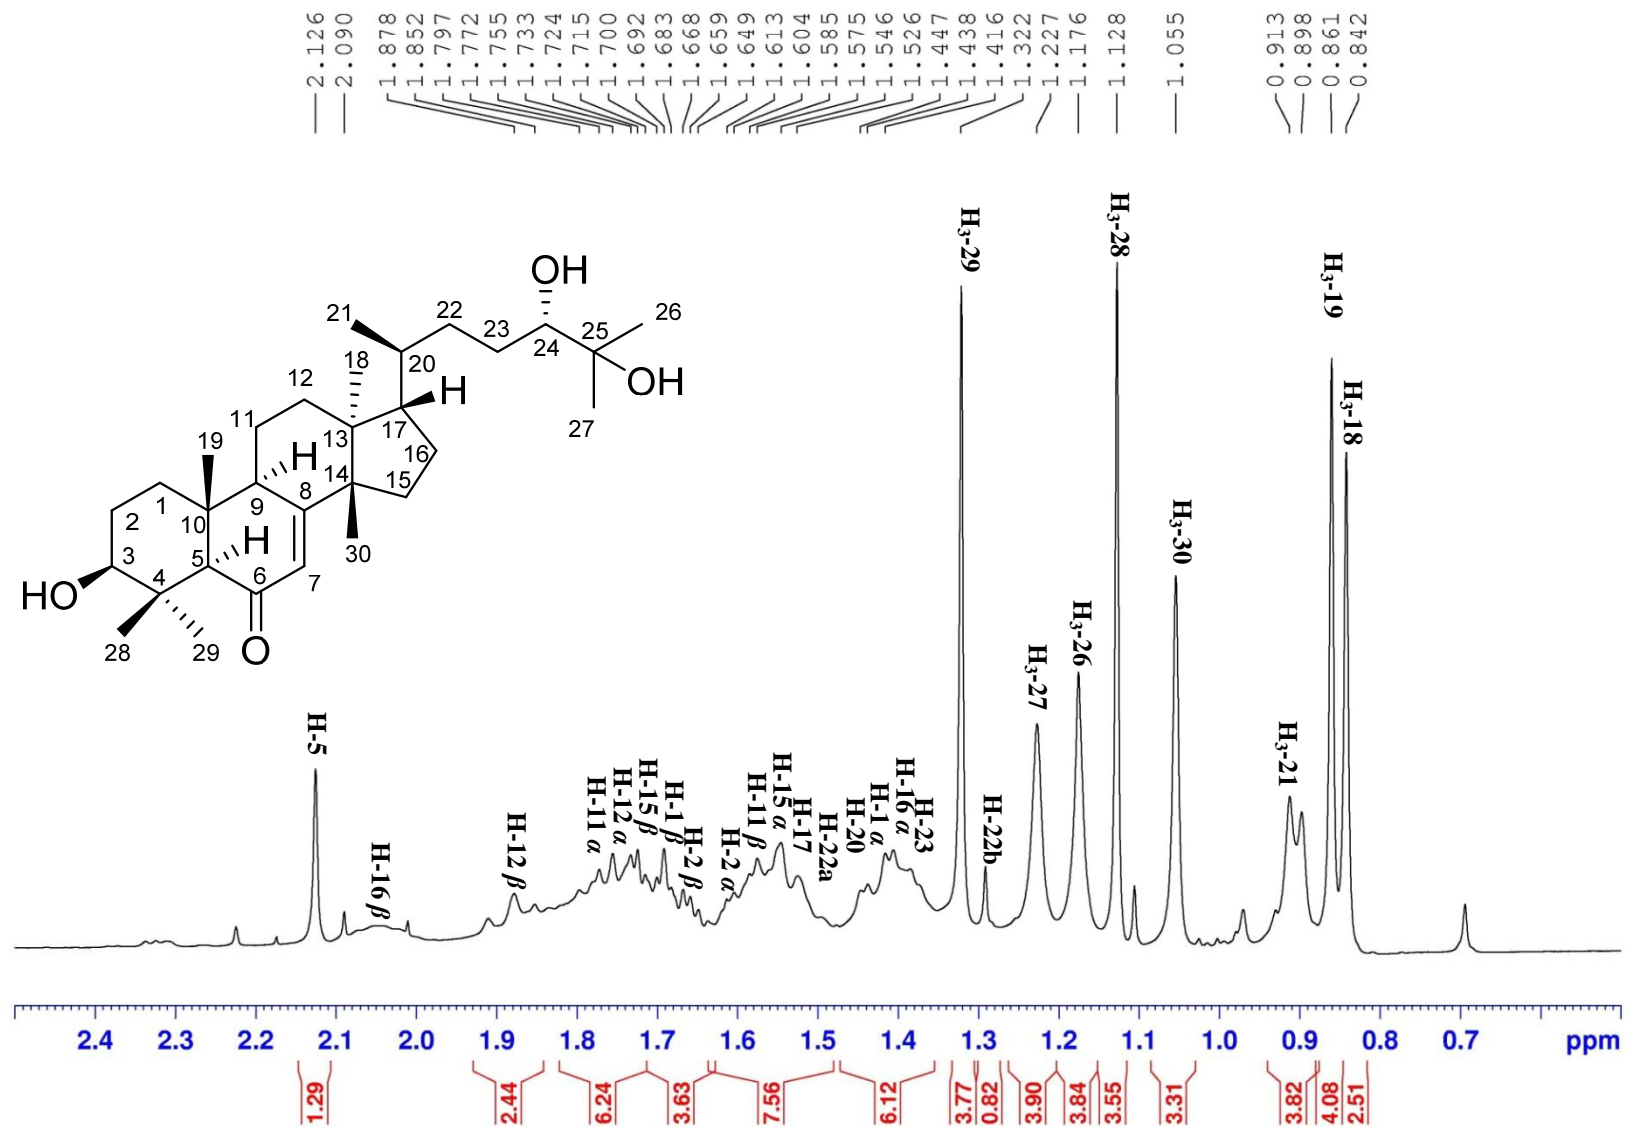

$^{13}\text{C}$  NMR (100 MHz) spectrum of compound **6** in  $\text{CDCl}_3$

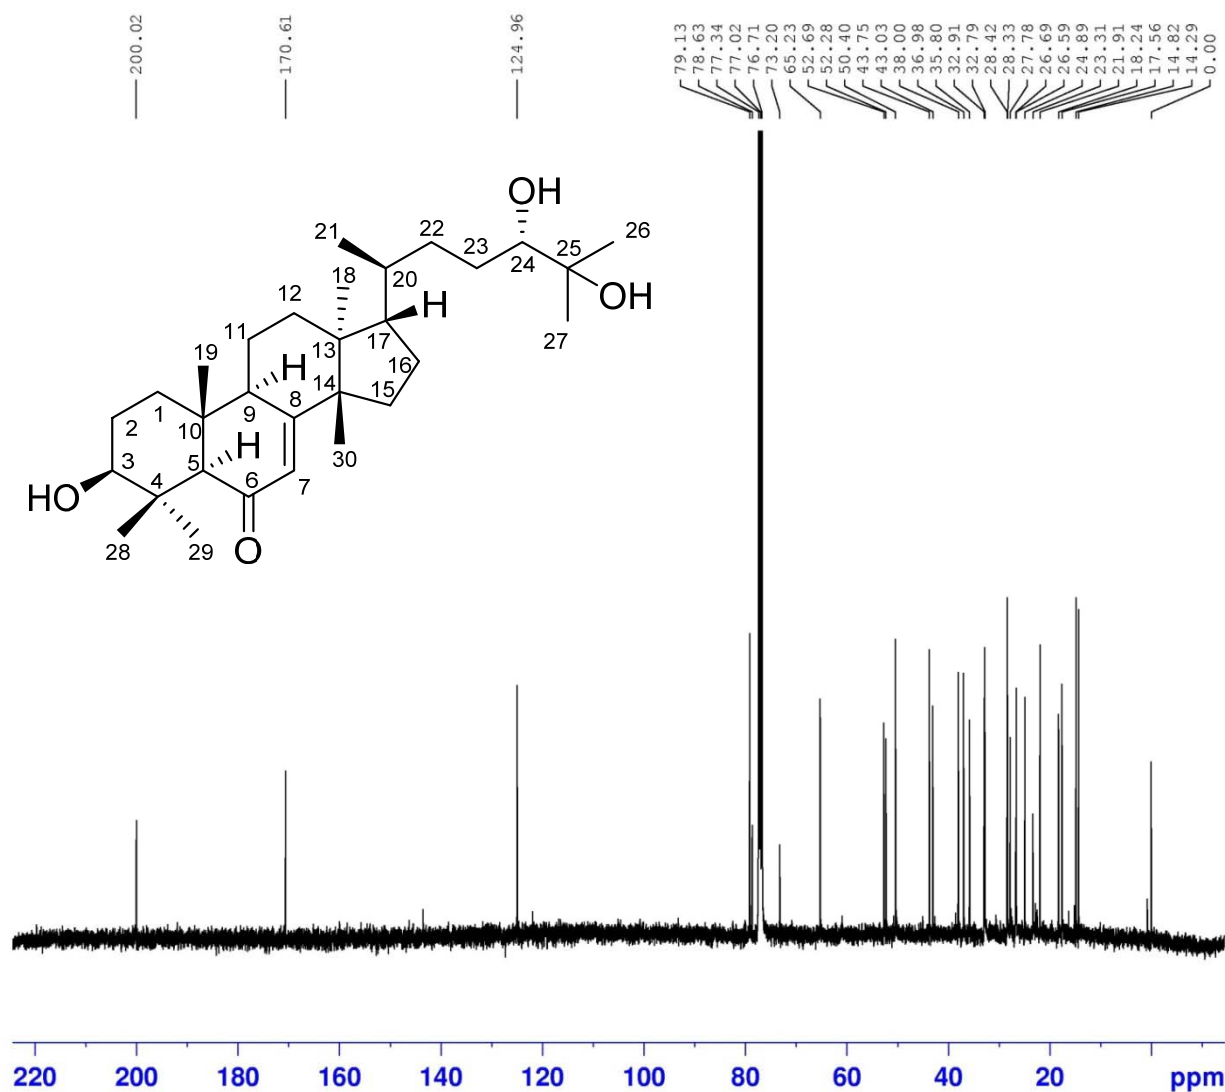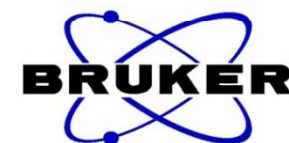

```

NAME          EA-16
EXPNO         102
PROCNO        1
Date_         20160726
Time          23.34
INSTRUM       spect
PROBHD        5 mm CPPBBO BB
PULPROG       zgpg30
TD            65536
SOLVENT       CDCl3
NS            1024
DS            4
SWH           24038.461 Hz
FIDRES        0.366798 Hz
AQ            1.3631988 sec
RG            102.3
DW            20.800 usec
DE            18.00 usec
TE            297.0 K
D1            2.00000000 sec
D11           0.03000000 sec
TD0           1
    
```

```

===== CHANNEL f1 =====
SF01         100.6233324 MHz
NUC1          13C
P1            10.00 usec
SI            32768
SF            100.6127689 MHz
WDW           EM
SSB           0
LB            1.00 Hz
GB            0
PC            1.40
    
```

$^{13}\text{C}$  NMR (100 MHz) spectrum of compound **6** in  $\text{CDCl}_3$

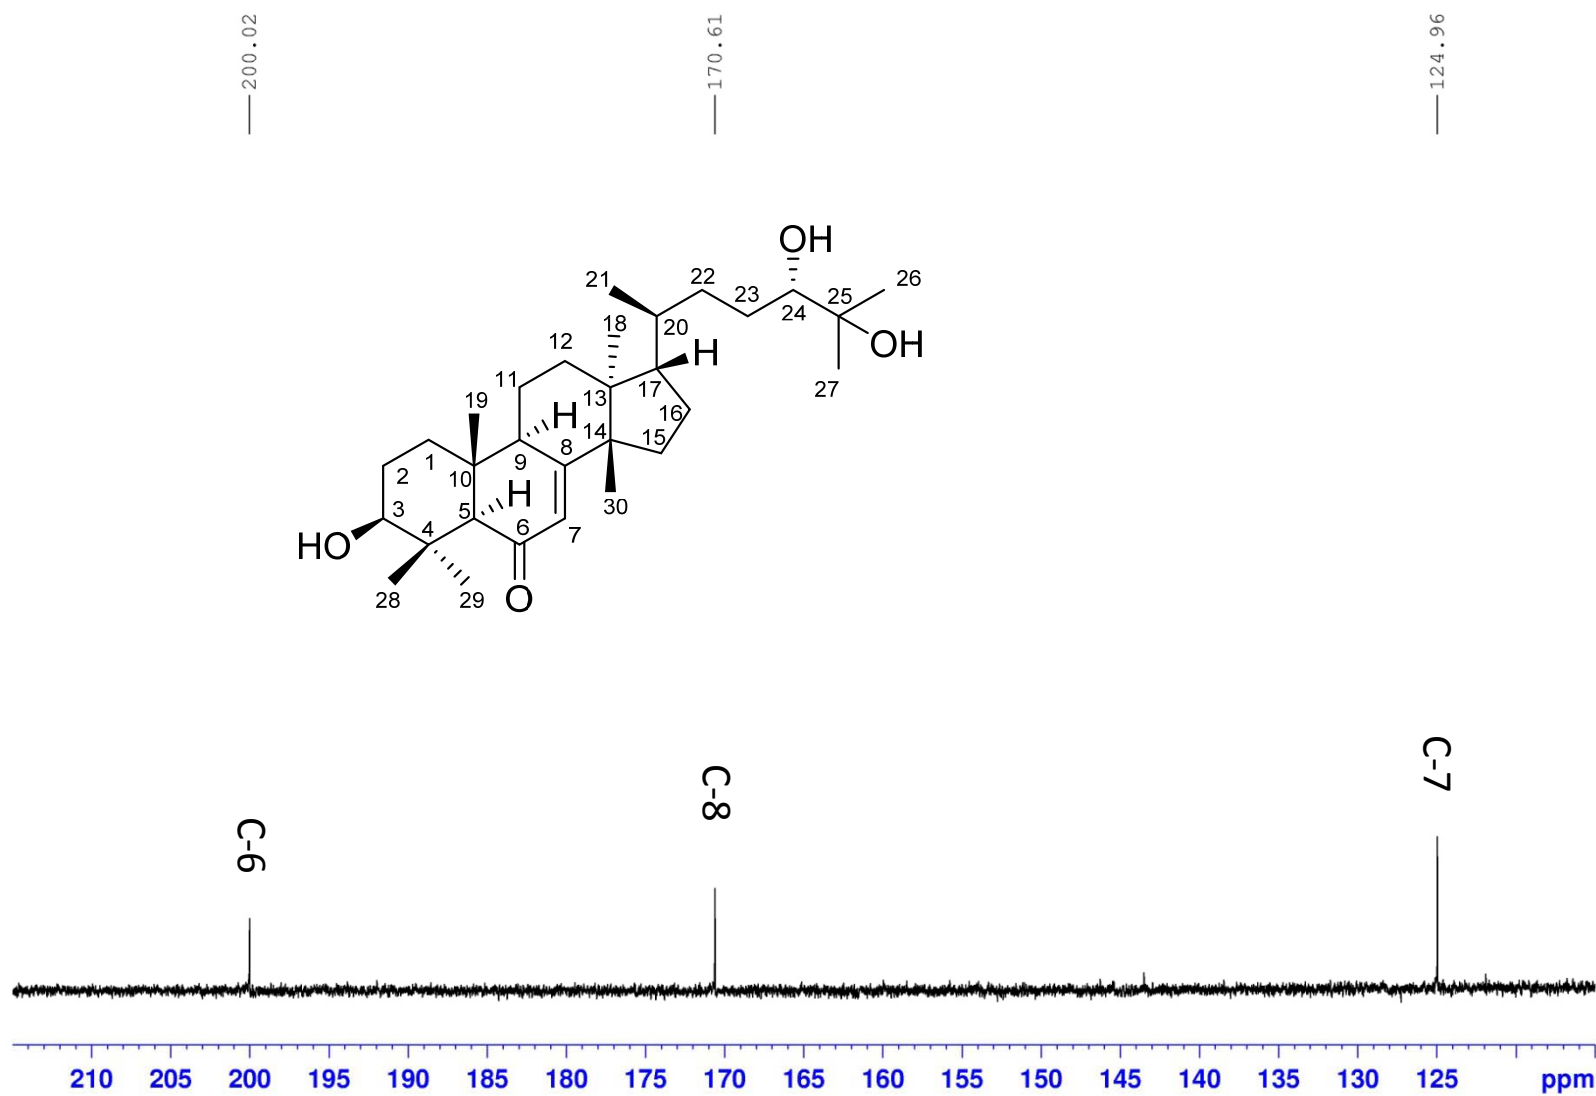

$^{13}\text{C}$  NMR (100 MHz) spectrum of compound **6** in  $\text{CDCl}_3$

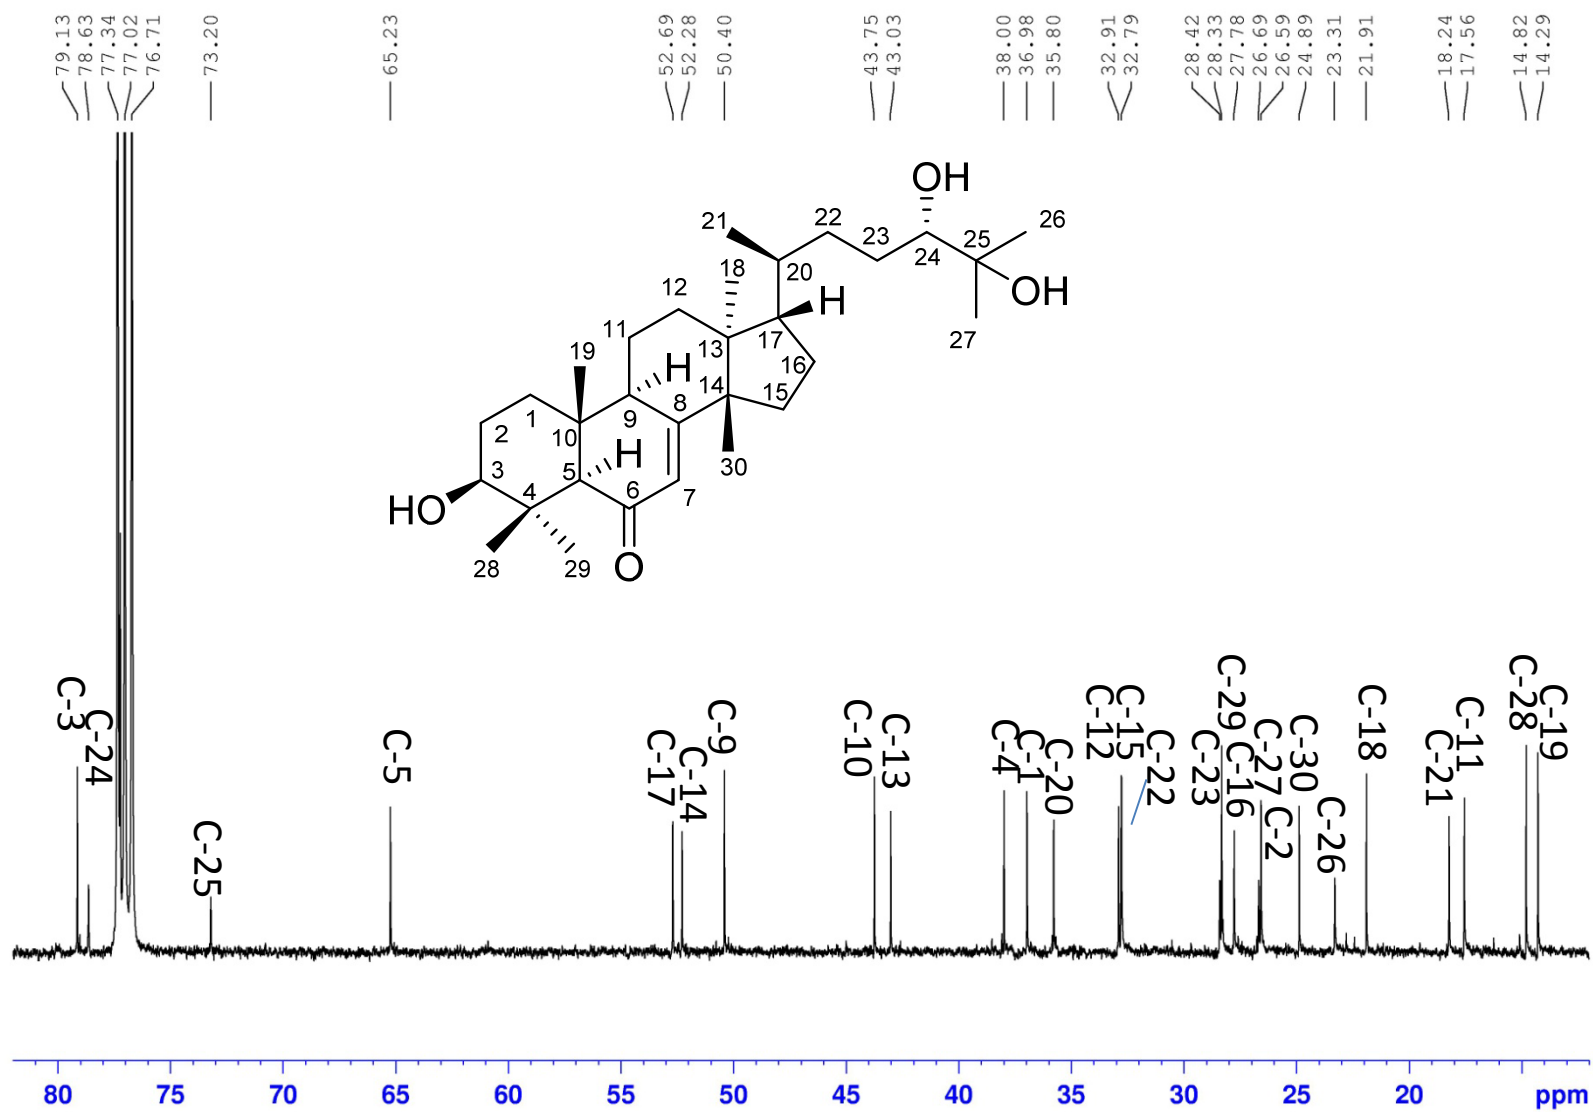

$^{13}\text{C}$  NMR (100 MHz) spectrum of compound **6** in  $\text{CDCl}_3$

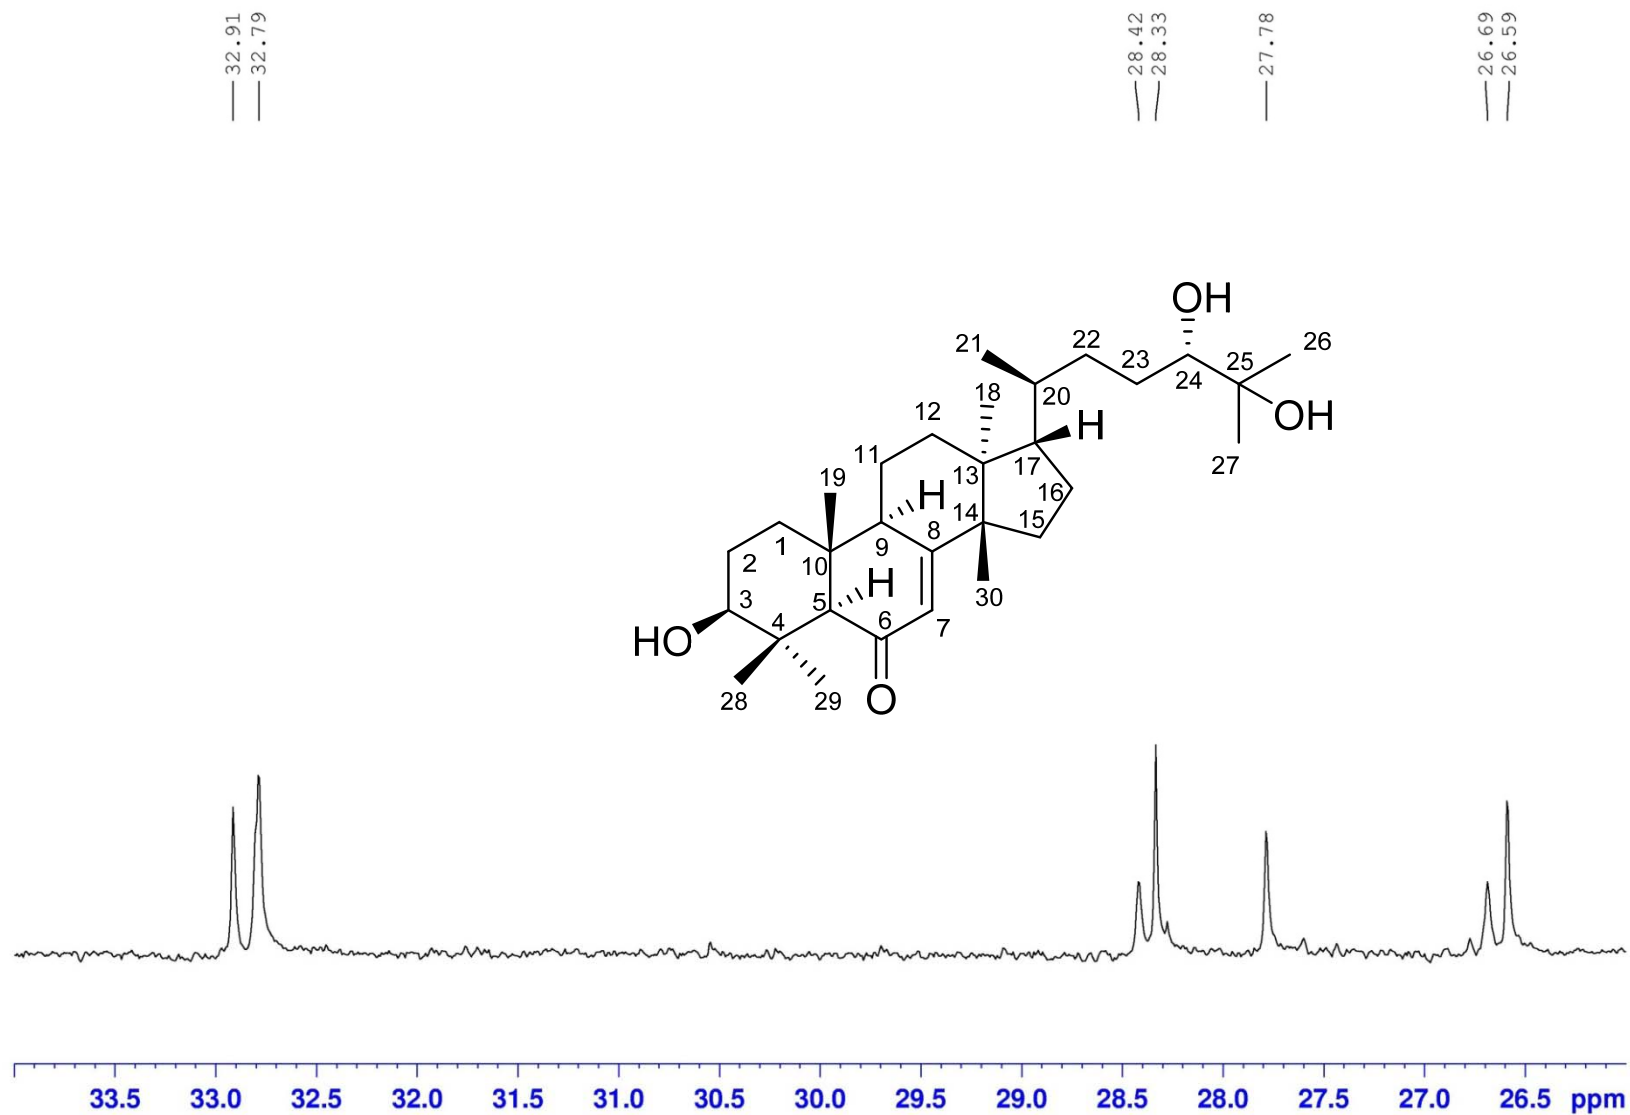



# DEPT135 (100 MHz) spectrum of compound **6** in CDCl<sub>3</sub>

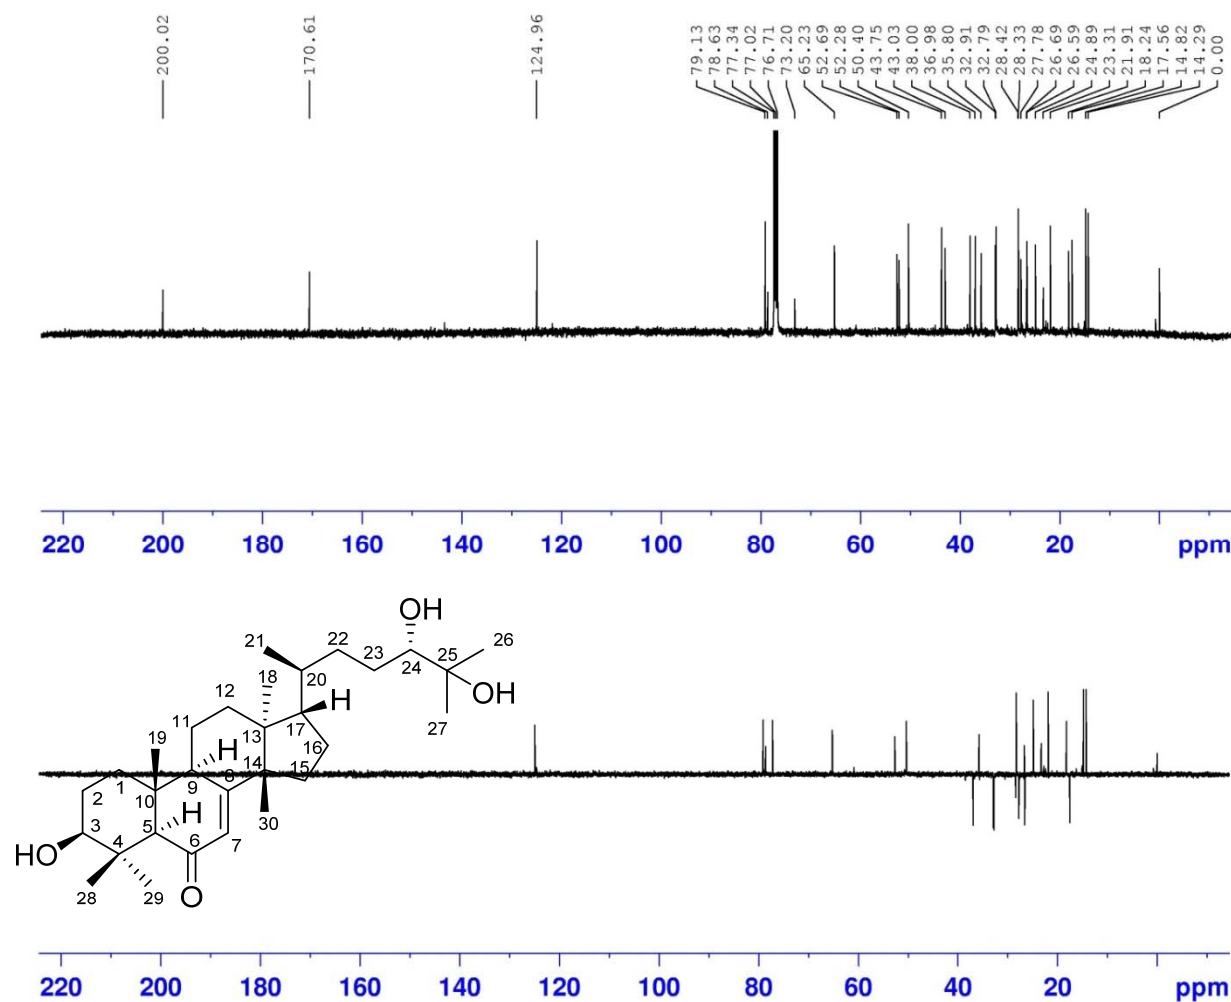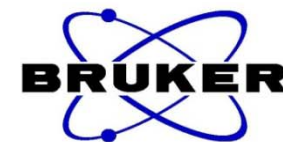

NAME EA-16  
EXPNO 103  
PROCNO 1  
Date\_ 20160726  
Time 23.52  
INSTRUM spect  
PROBHD 5 mm CPBBO BB  
PULPROG deptsp135  
TD 65536  
SOLVENT cdcl3  
NS 300  
DS 4  
SWH 24038.461 Hz  
FIDRES 0.366798 Hz  
AQ 1.3631988 sec  
RG 130.26  
DW 20.800 usec  
DE 18.00 usec  
TE 297.0 K  
CNST2 145.0000000  
D1 2.0000000 sec  
D2 0.00344828 sec  
D12 0.00002000 sec  
TD0 1

===== CHANNEL f1 =====  
SF01 100.623324 MHz  
NUC1 13C  
P1 10.00 usec  
P13 2000.00 usec  
SI 32768  
SF 100.6127689 MHz  
WDW EM  
SSB 0  
LB 1.00 Hz  
GB 0  
PC 1.40

DEPT135 (100 MHz) spectrum of compound **6** in CDCl<sub>3</sub>

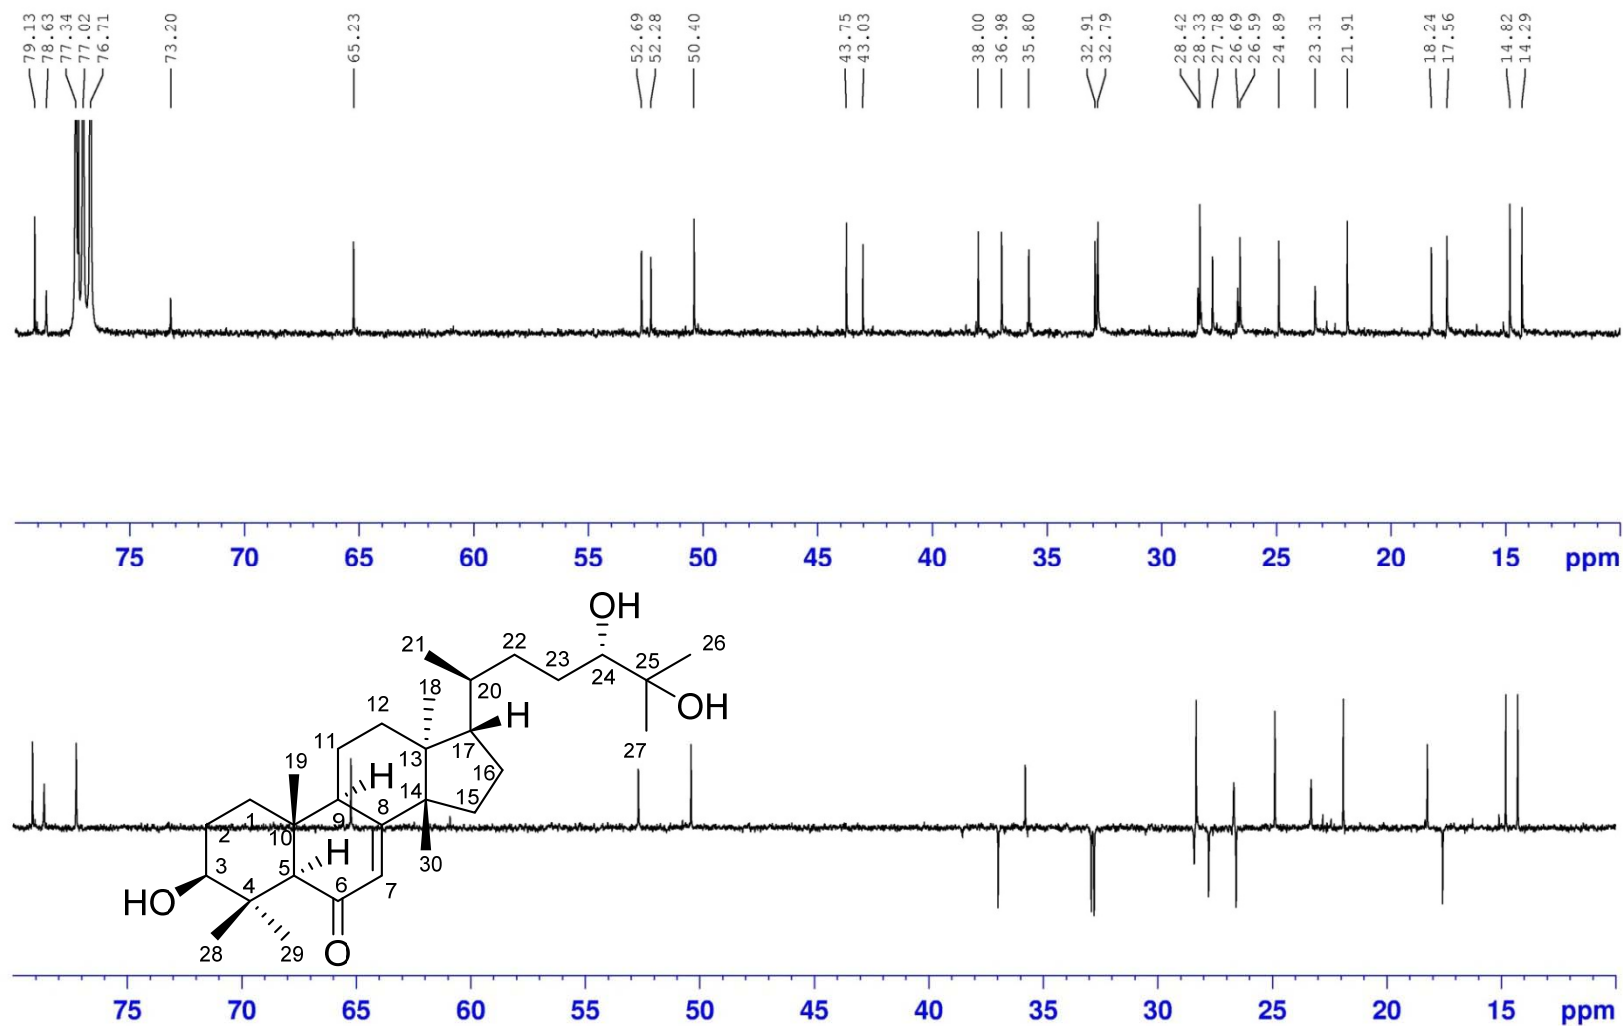

$^1\text{H}$ - $^1\text{H}$  COSY (400 MHz) spectrum of compound **6** in  $\text{CDCl}_3$

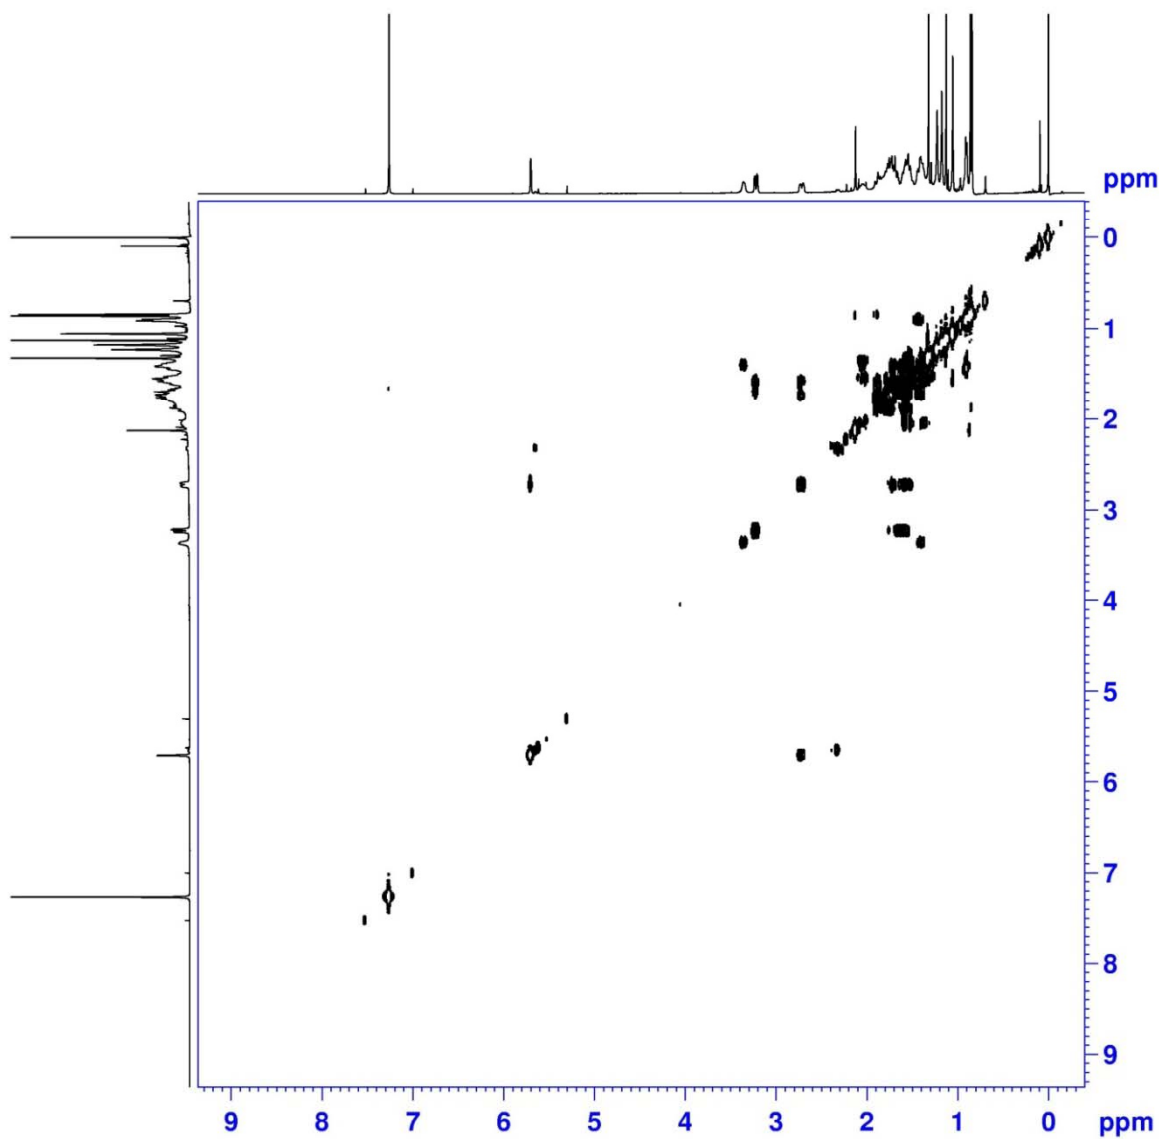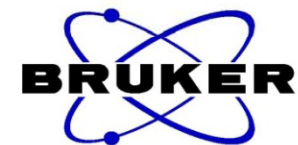

```

NAME          EA-16
EXPNO          4
PROCNO         1
Date_         20160806
Time          5.58
INSTRUM       spect
PROBHD        5 mm CPPBBO BB
PULPROG       cosygpppqf
TD            2048
SOLVENT       CDCl3
NS             8
DS             8
SWH           3906.250 Hz
FIDRES        1.907349 Hz
AQ            0.2621940 sec
RG            208.5
DW            128.000 usec
DE            10.00 usec
TE            297.0 K
D0            0.00000300 sec
D1            1.89678097 sec
D11           0.03000000 sec
D12           0.00002000 sec
D13           0.00000400 sec
D16           0.00020000 sec
IN0           0.00025600 sec
  
```

```

===== CHANNEL f1 =====
SFO1         400.1318006 MHz
NUC1          1H
P0            11.50 usec
P1            11.50 usec
P17          2500.00 usec
ND0           1
TD            128
SFO1         400.1318 MHz
FIDRES        30.517578 Hz
SW            9.762 ppm
FnMODE        QF
SI            1024
SF           400.1300062 MHz
WDW           QSINE
SSB           0
LB            0.00 Hz
GB            0
PC            1.40
SI            1024
MC2           QF
SF           400.1300086 MHz
WDW           QSINE
SSR           0
  
```

$^1\text{H}$ - $^1\text{H}$  COSY (400 MHz) spectrum of compound **6** in  $\text{CDCl}_3$

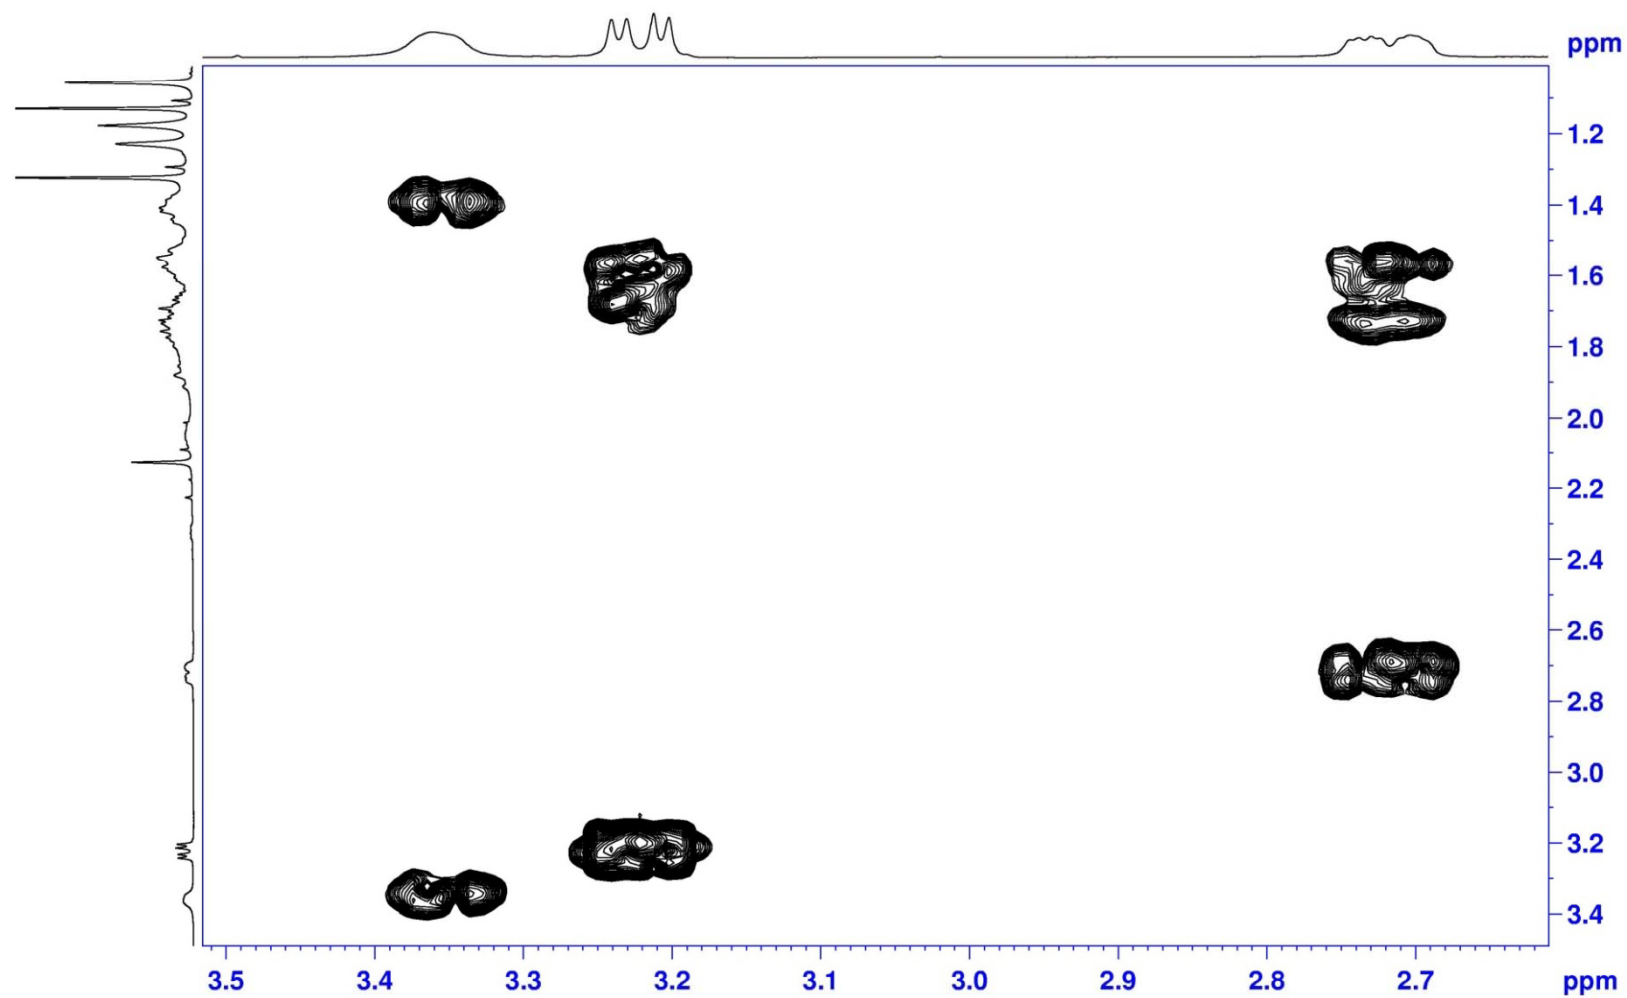

$^1\text{H}$ - $^1\text{H}$  COSY (400 MHz) spectrum of compound **6** in  $\text{CDCl}_3$

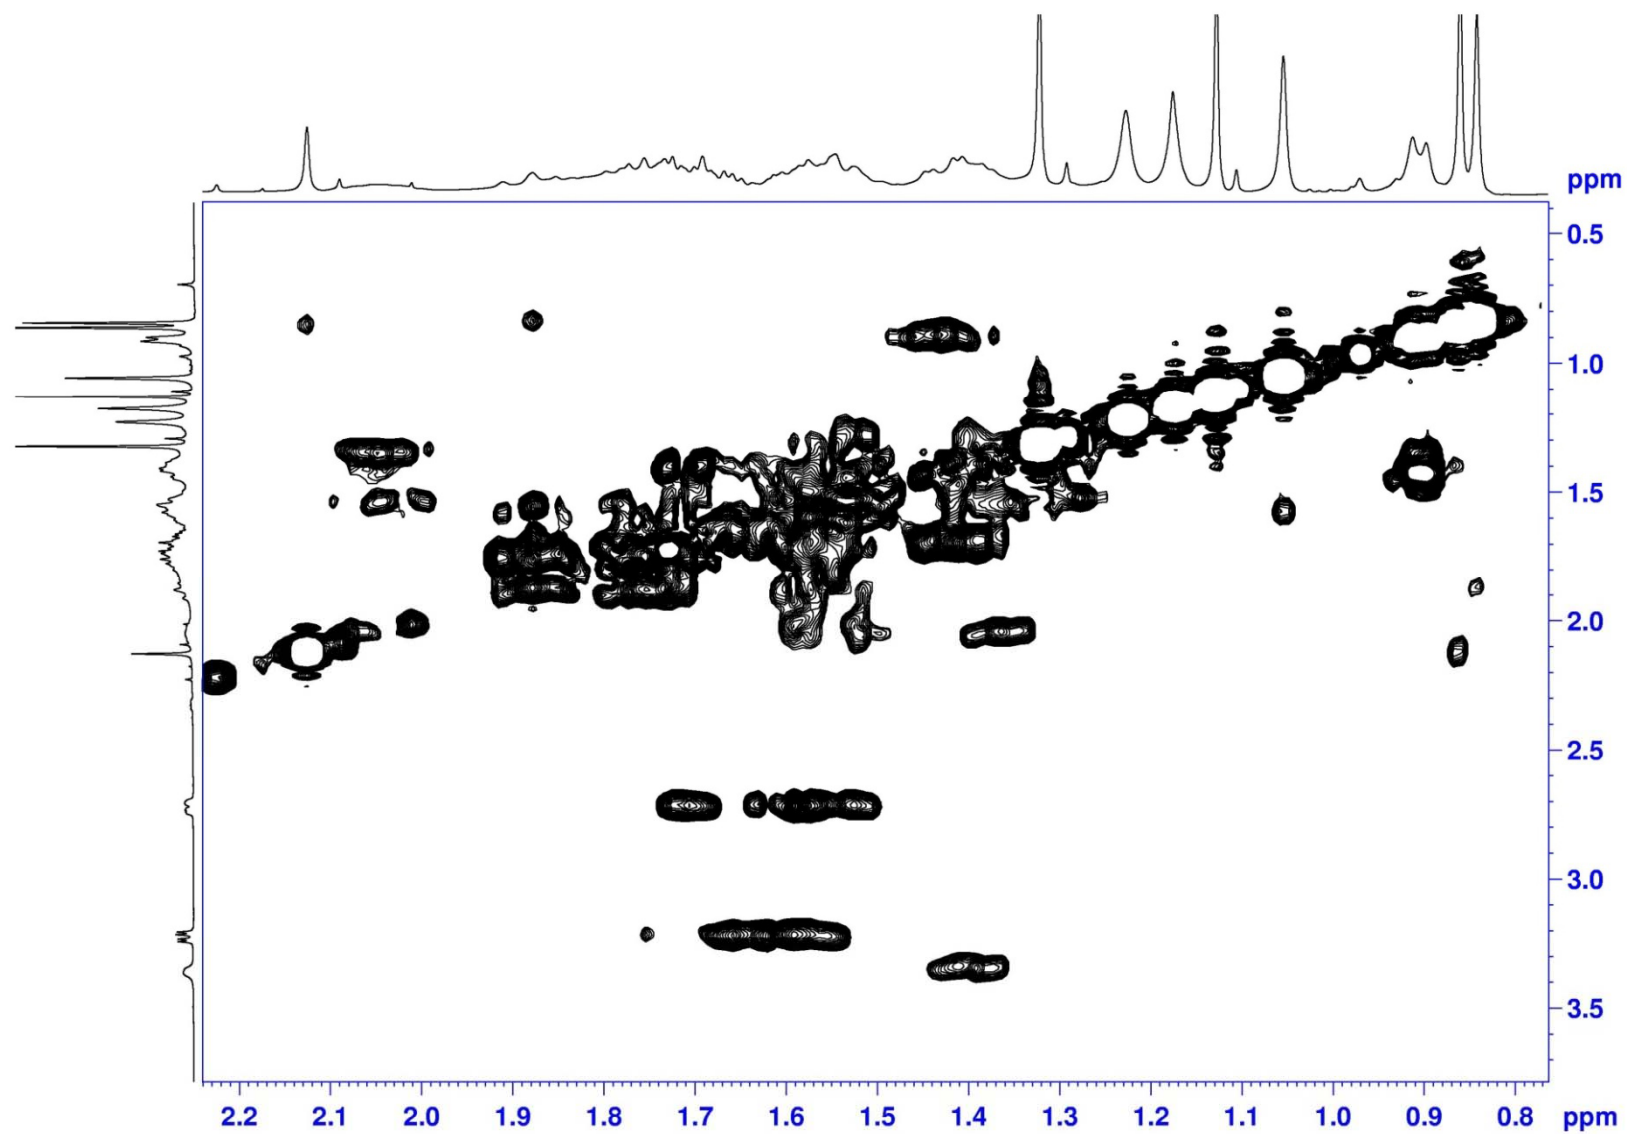

$^1\text{H}$ - $^1\text{H}$  COSY (400 MHz) spectrum of compound **6** in  $\text{CDCl}_3$

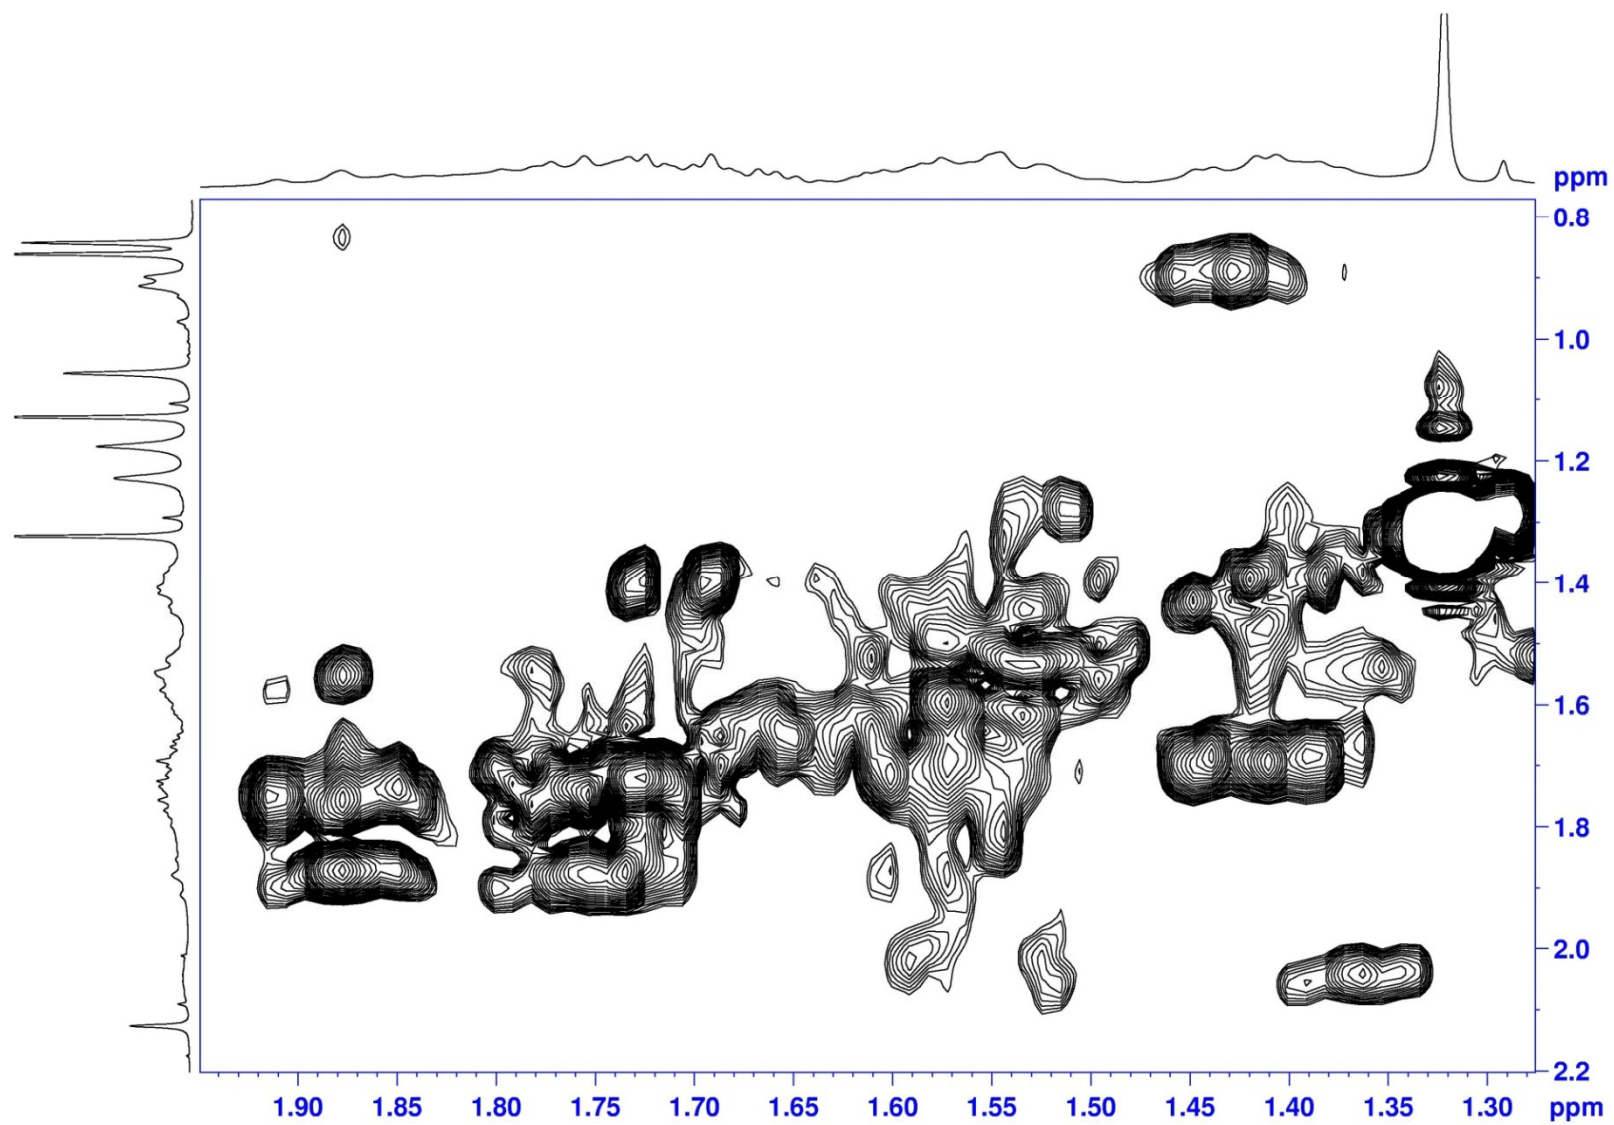

# HSQC (400 MHz) spectrum of compound **6** in CDCl<sub>3</sub>

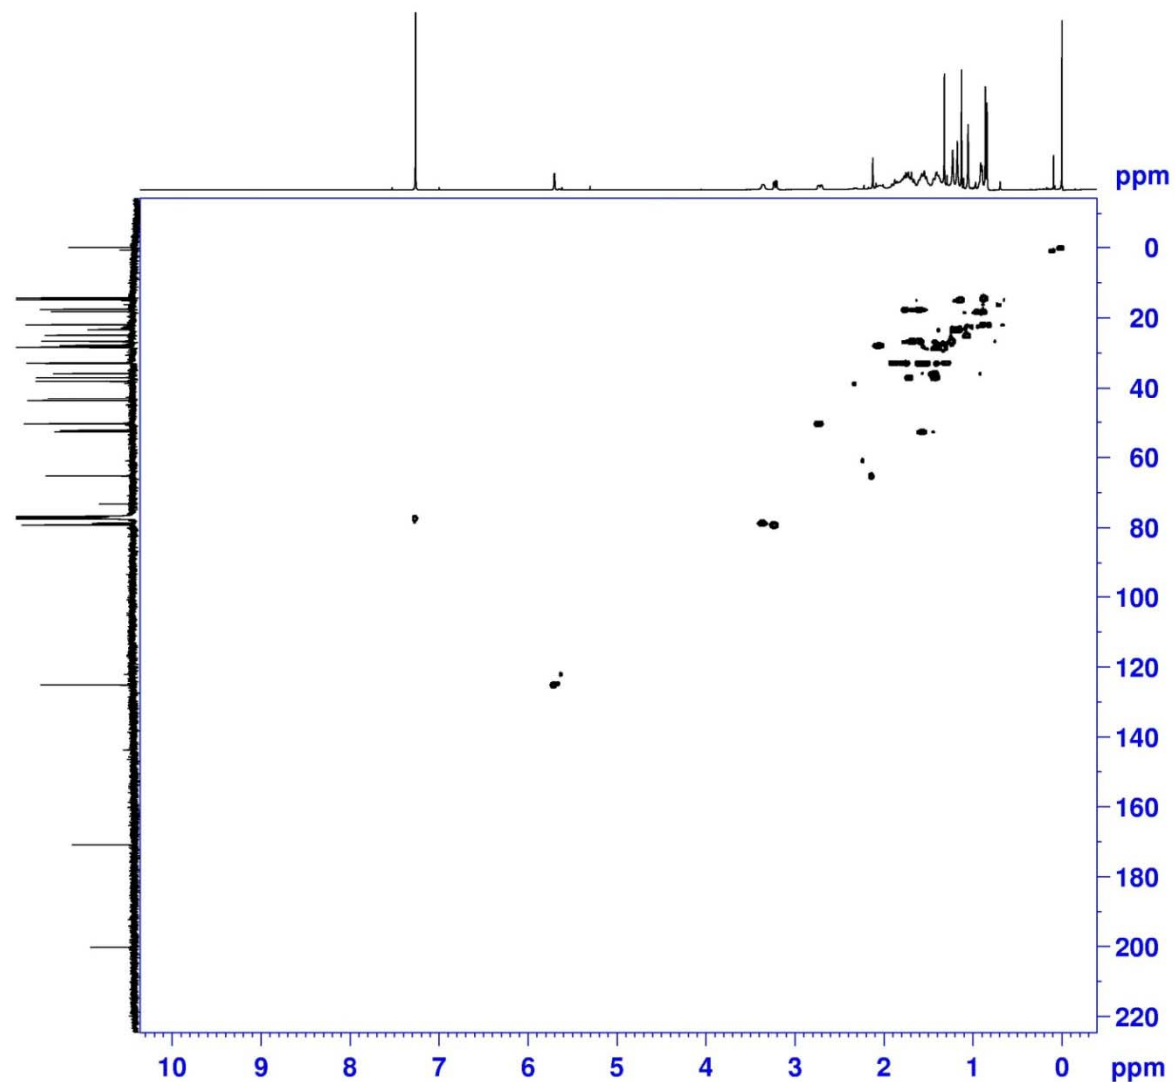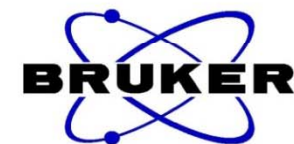

```

NAME           EA-16
EXPNO          5
PROCNO         1
Date_          20160806
Time           6.37
INSTRUM        spect
PROBHD         5 mm CPPBBO BB
PULPROG        hsqcetgpsi2
TD             1024
SOLVENT        CDCl3
NS             16
DS             16
SWH            4302.926 Hz
FIDRES         4.202076 Hz
AQ             0.1190388 sec
RG             208.5
DW             116.200 usec
DE             10.00 usec
TE             297.0 K
CNST2          145.0000000
D0             0.00000300 sec
D1             1.46497905 sec
D4             0.00172414 sec
D11            0.03000000 sec
D16            0.00020000 sec
D24            0.00086207 sec
IN0            0.00002080 sec
ZGOPTNS
    
```

```

===== CHANNEL f1 =====
SF01          400.1320007 MHz
NUC1           1H
P1             11.50 usec
P2             23.00 usec
P28            0.00 usec
ND0            2
TD             256
SF01          100.6233 MHz
FIDRES         93.900238 Hz
SW             238.896 ppm
FnMODE        Echo-Antiecho
SI            1024
SF            400.1300059 MHz
WDW            QSINE
SSB            2
LB             0.00 Hz
GB             0
PC             1.40
SI            1024
MC2           echo-antiecho
SF            100.6127568 MHz
WDW            QSINE
SSB            2
    
```

HSQC (400 MHz) spectrum of compound **6** in  $\text{CDCl}_3$

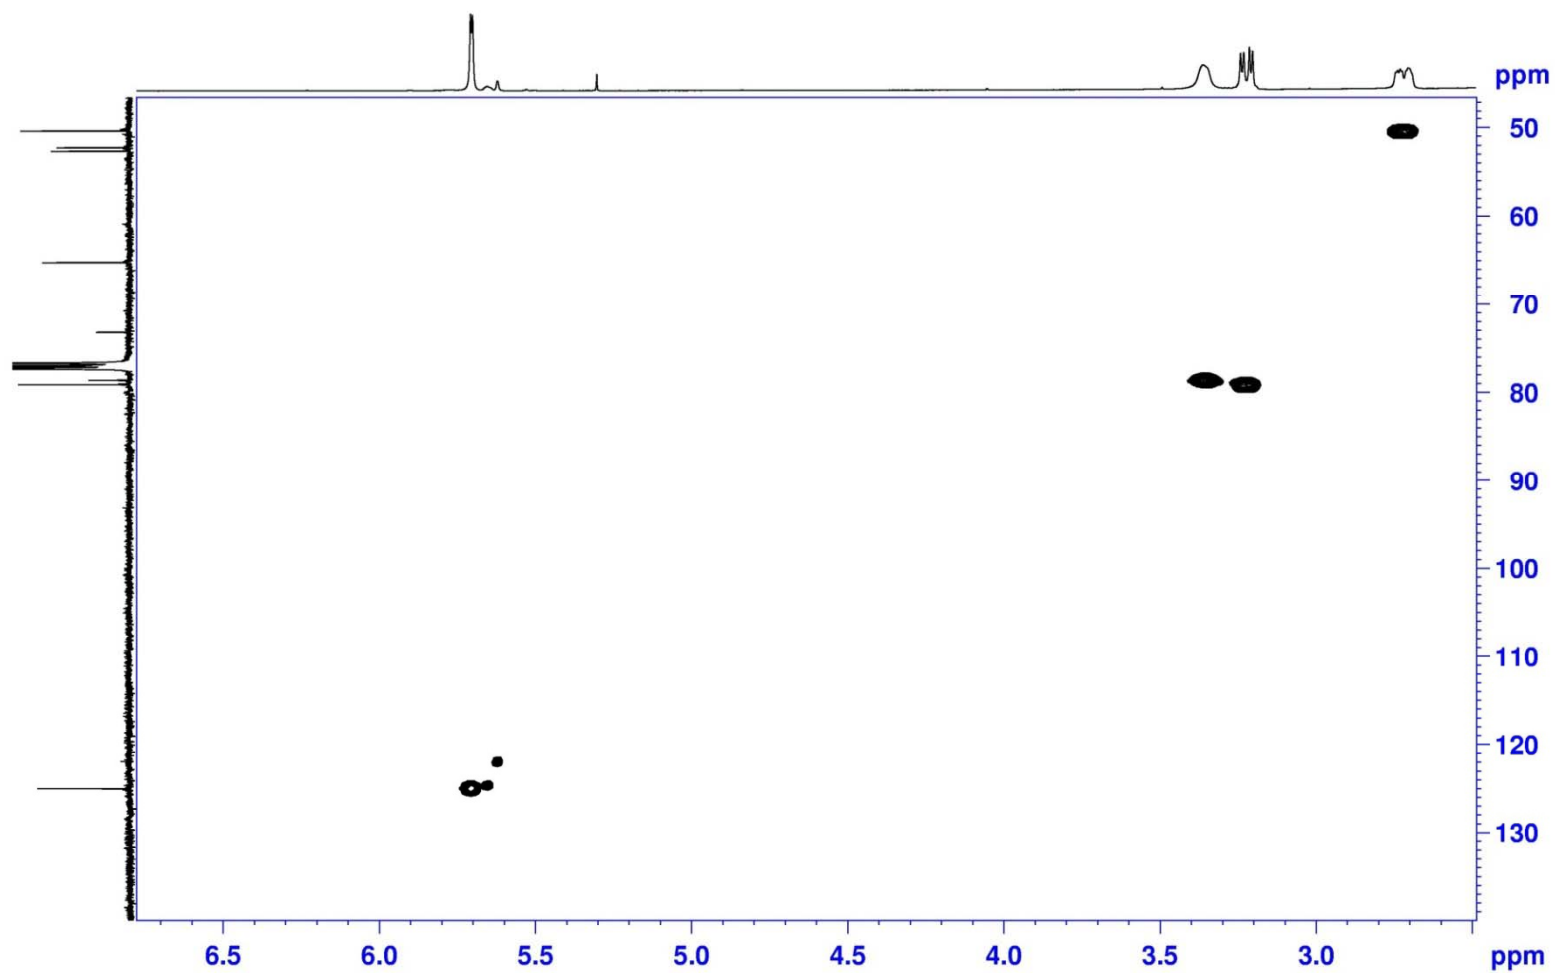



HSQC (400 MHz) spectrum of compound **6** in CDCl<sub>3</sub>

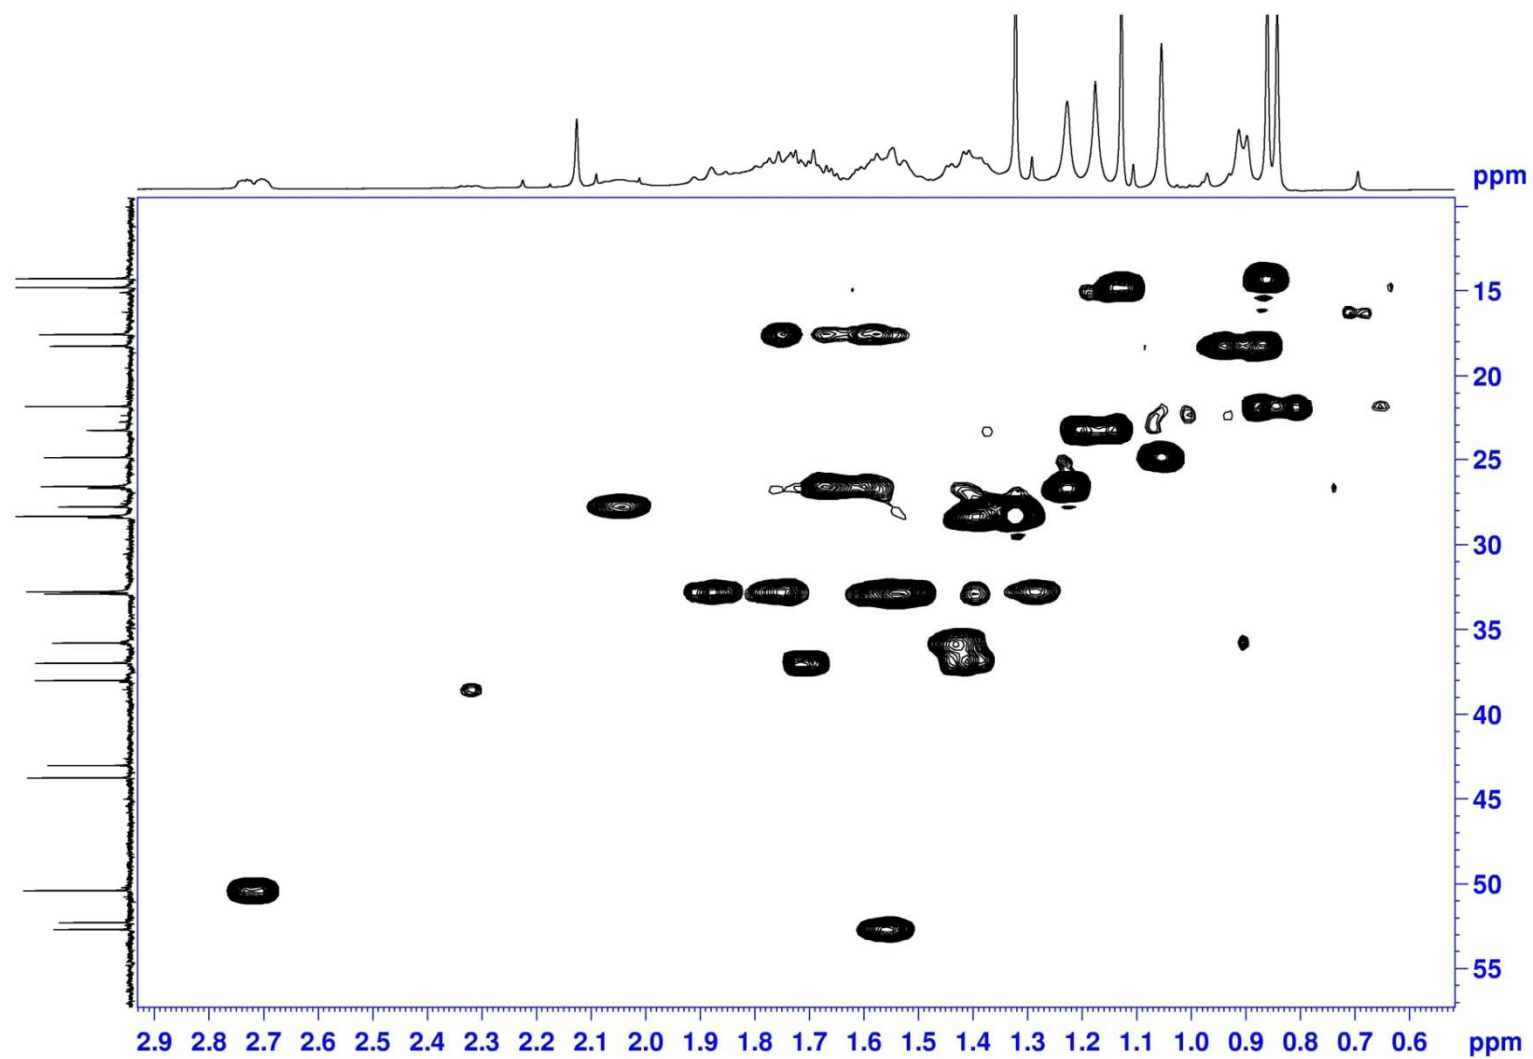

HSQC (400 MHz) spectrum of compound **6** in CDCl<sub>3</sub>

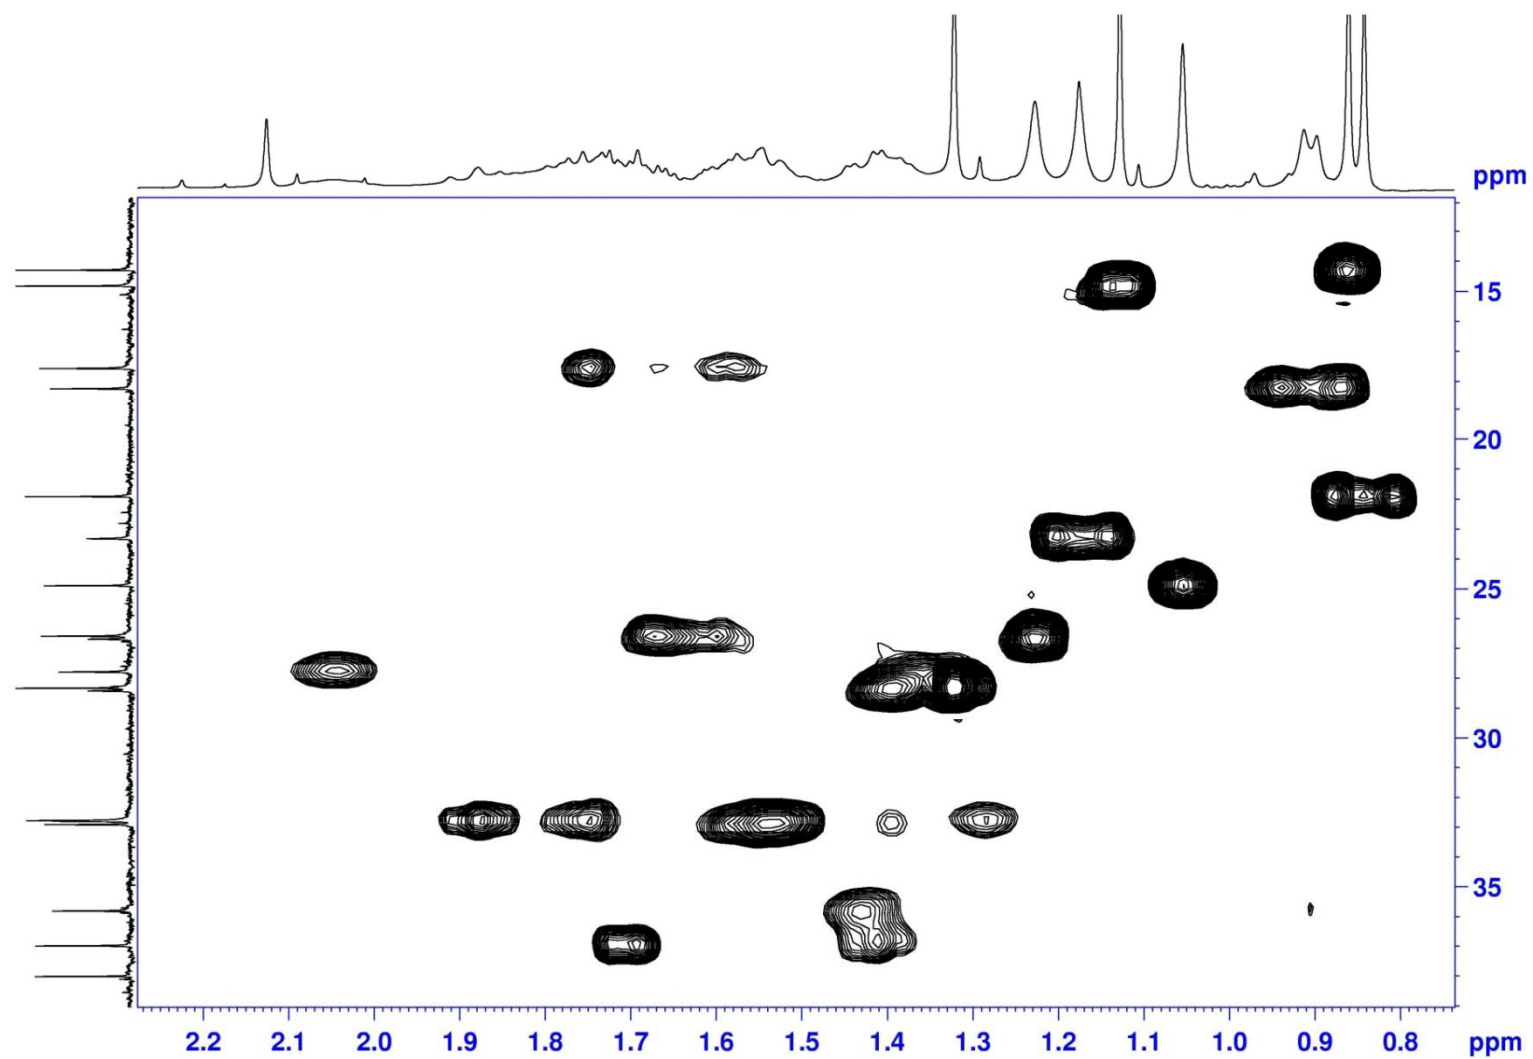

# HMBC (400 MHz) spectrum of compound **6** in CDCl<sub>3</sub>

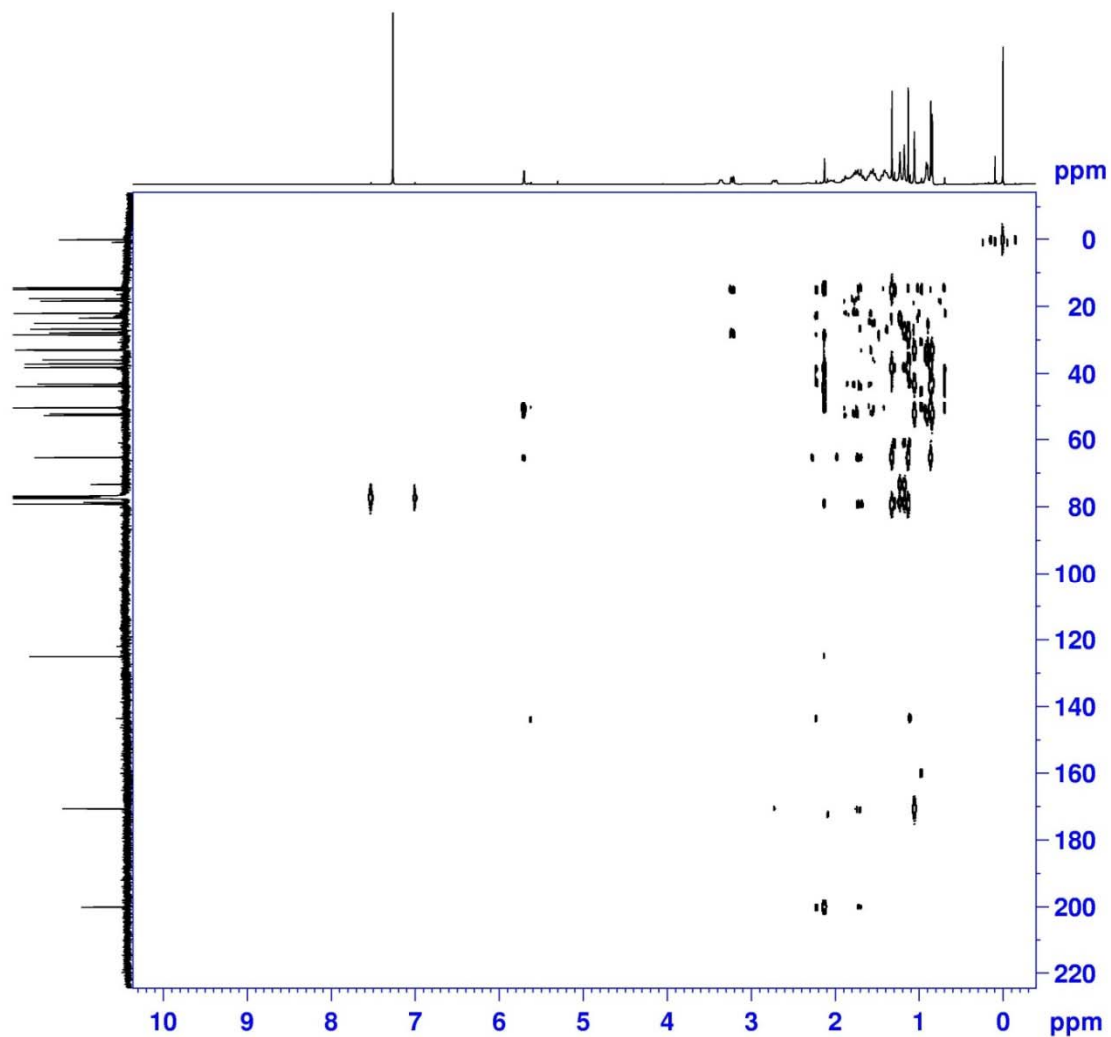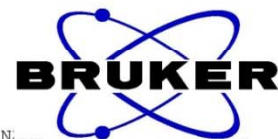

```

N_...
EXPNO 6
PROCNO 1
Date_ 20160806
Time 8.28
INSTRUM spect
PROBHD 5 mm CPPBBO BB
PULPROG hmbcgp1pndqf
TD 4096
SOLVENT CDCl3
NS 32
DS 16
SWH 5197.505 Hz
FIDRES 1.268922 Hz
AQ 0.3940852 sec
RG 208.5
DW 96.200 usec
DE 10.00 usec
TE 297.0 K
CNST2 145.0000000
CNST13 10.0000000
D0 0.00000300 sec
D1 1.50000000 sec
D2 0.00344828 sec
D6 0.05000000 sec
D16 0.00020000 sec
IN0 0.00002080 sec
  
```

```

===== CHANNEL f1 =====
SFO1 400.1323208 MHz
NUC1 1H
P1 11.50 usec
P2 23.00 usec
ND0 2
TD 128
SFO1 100.6233 MHz
FIDRES 187.800476 Hz
SW 238.896 ppm
FnMODE QF
SI 2048
SF 400.1300066 MHz
WDW SINE
SSB 0
LB 0.00 Hz
GB 0
PC 1.40
SI 1024
MC2 QF
SF 100.6127622 MHz
WDW SINE
SSB 0
LB 0.00 Hz
GB 0
  
```

HMBC (400 MHz) spectrum of compound **6** in CDCl<sub>3</sub>

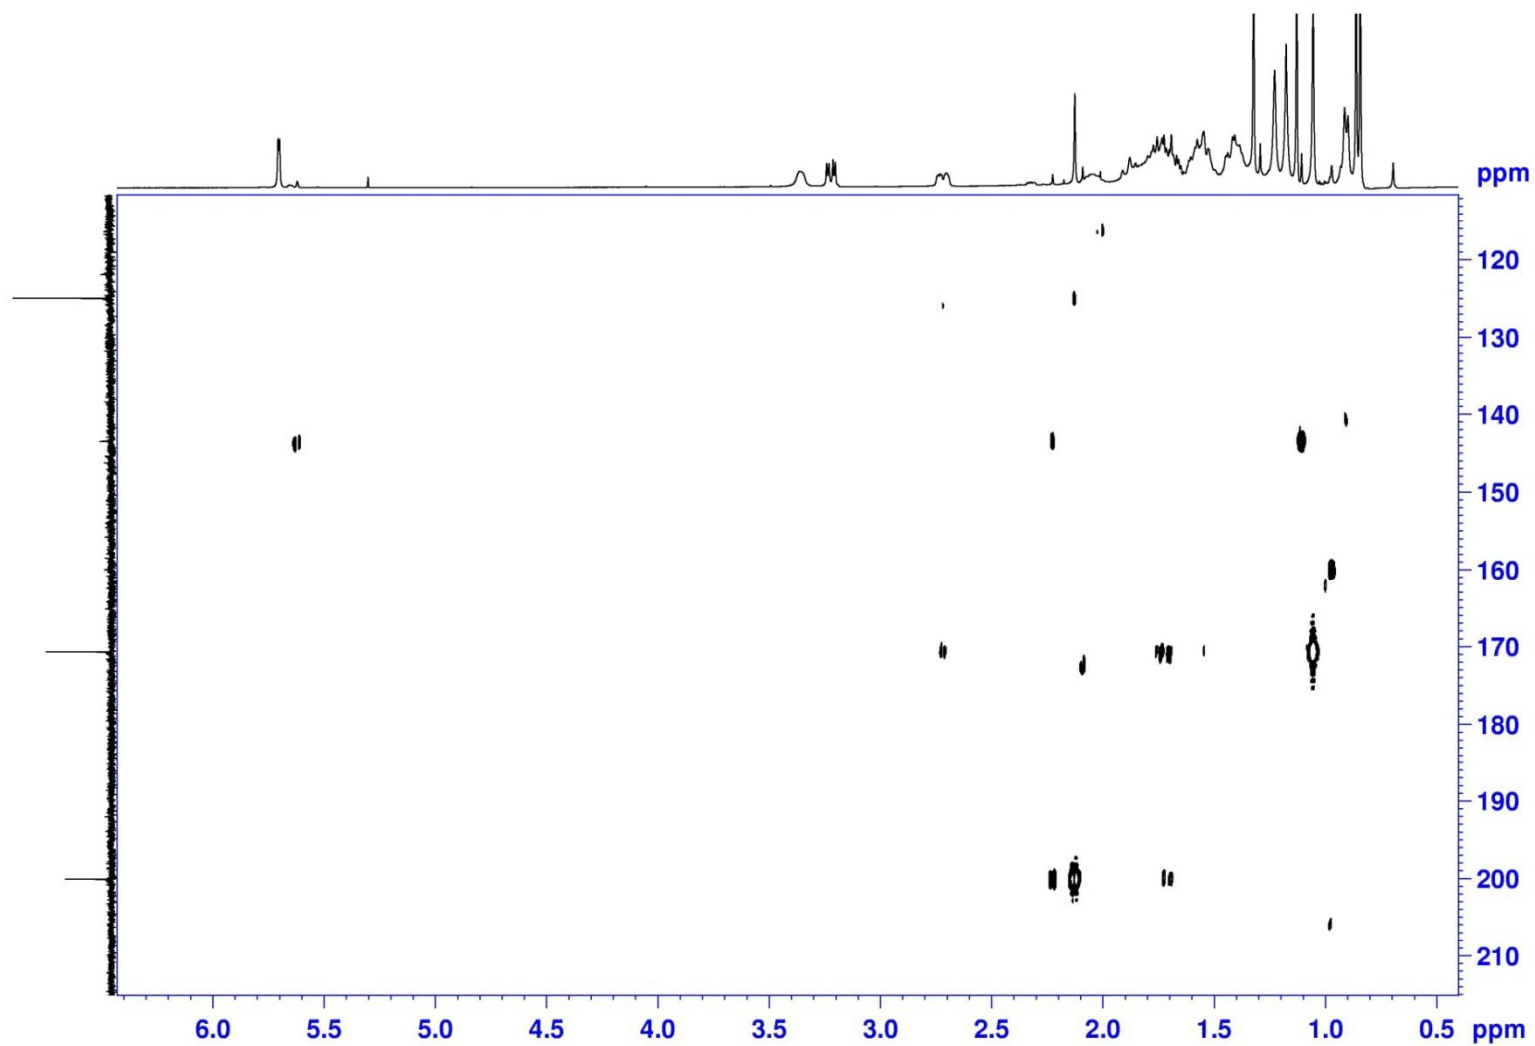

HMBC (400 MHz) spectrum of compound **6** in CDCl<sub>3</sub>

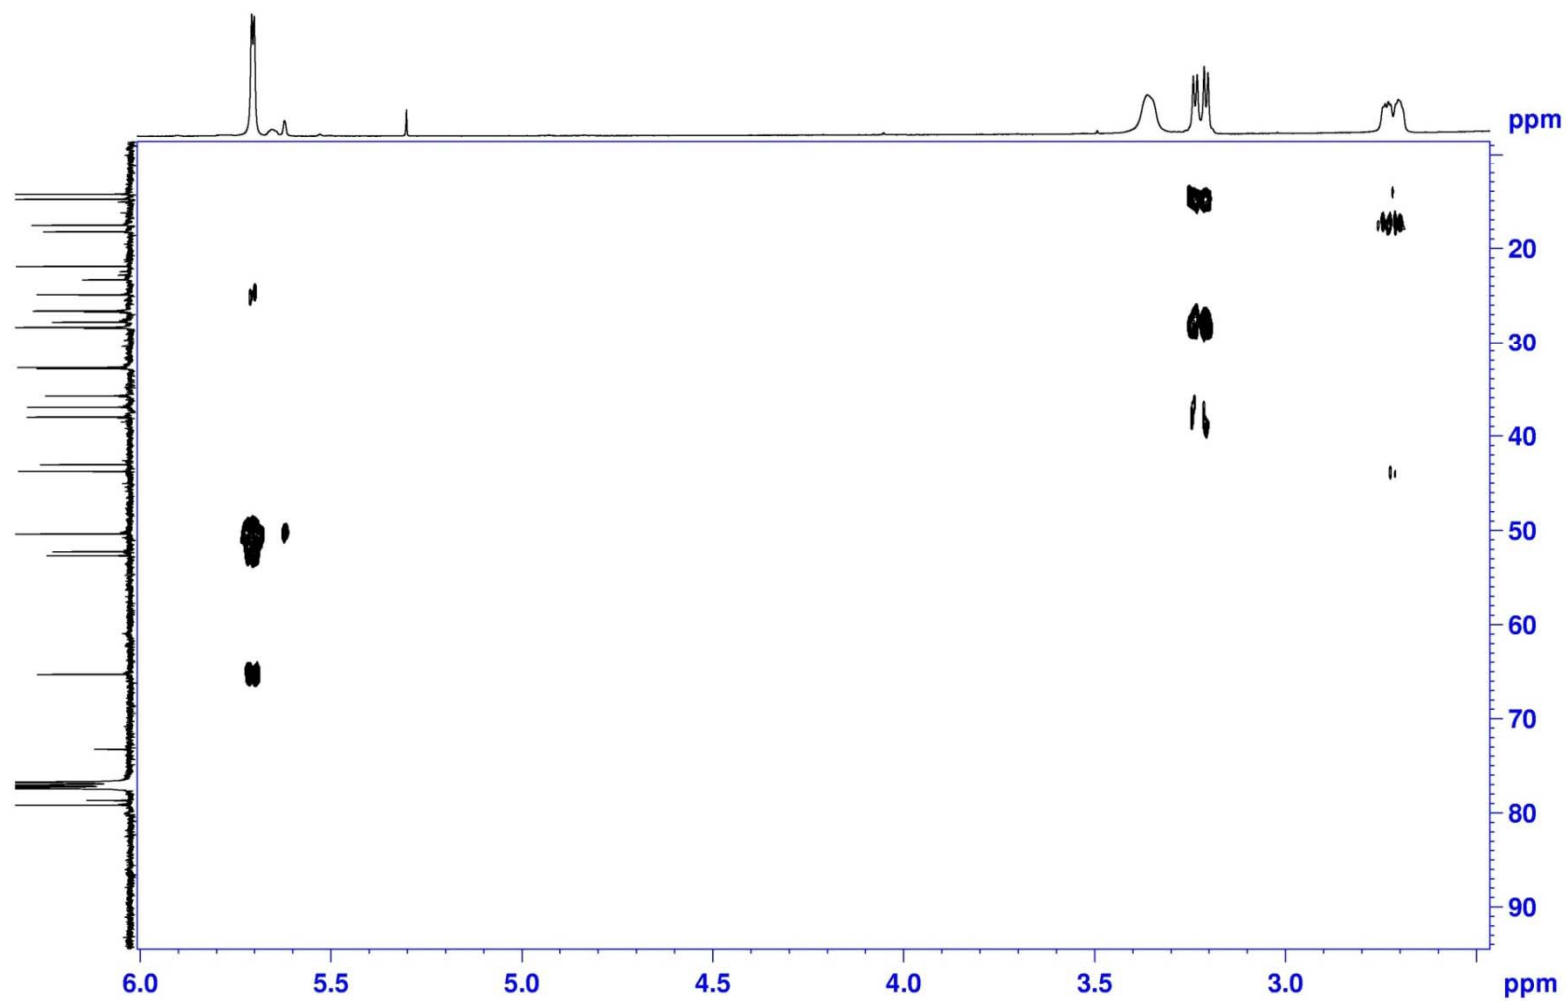

HMBC (400 MHz) spectrum of compound **6** in CDCl<sub>3</sub>

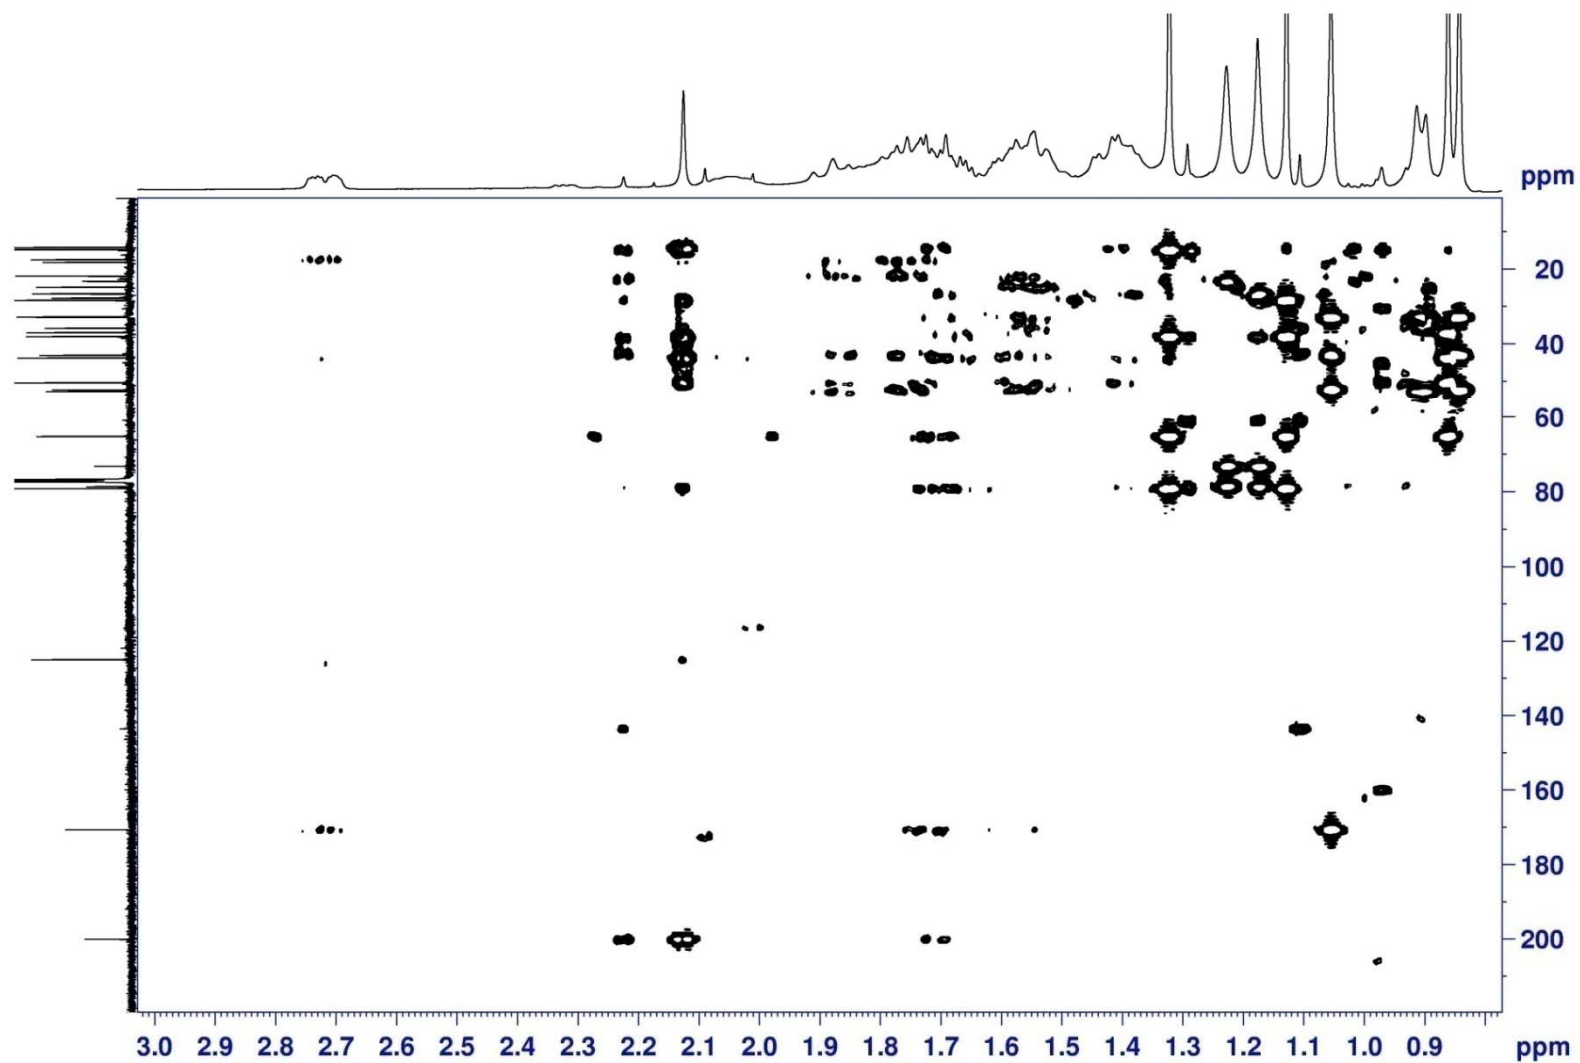

HMBC (400 MHz) spectrum of compound **6** in CDCl<sub>3</sub>

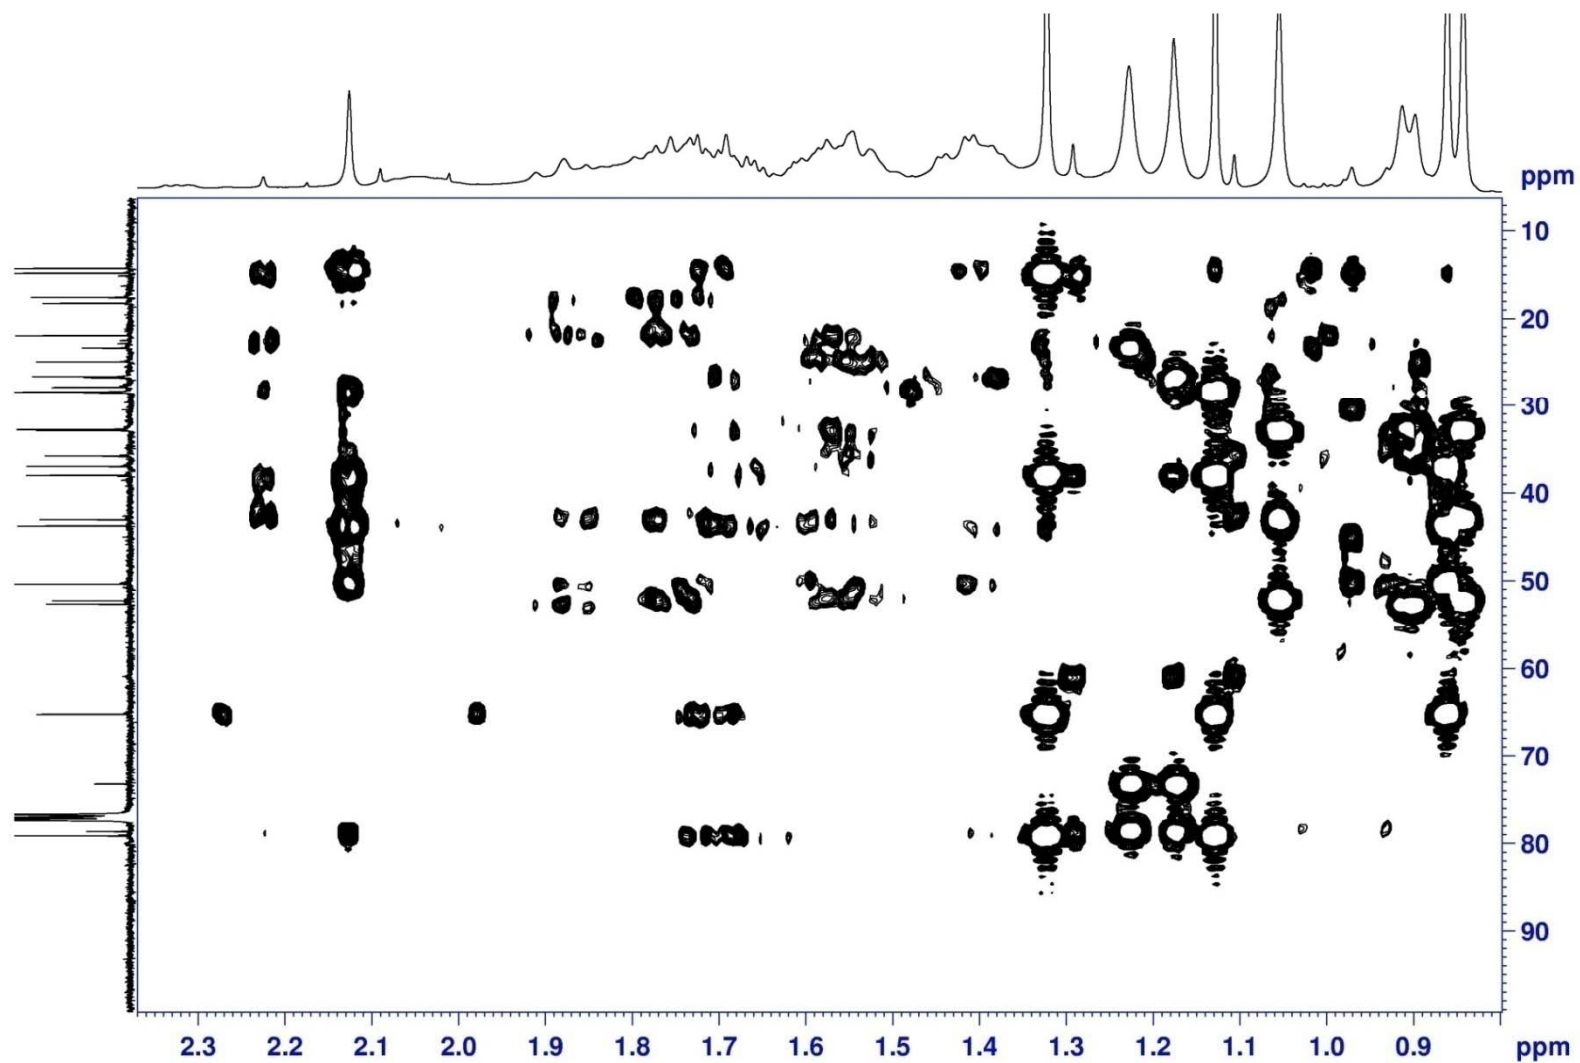

HMBC (400 MHz) spectrum of compound **6** in  $\text{CDCl}_3$

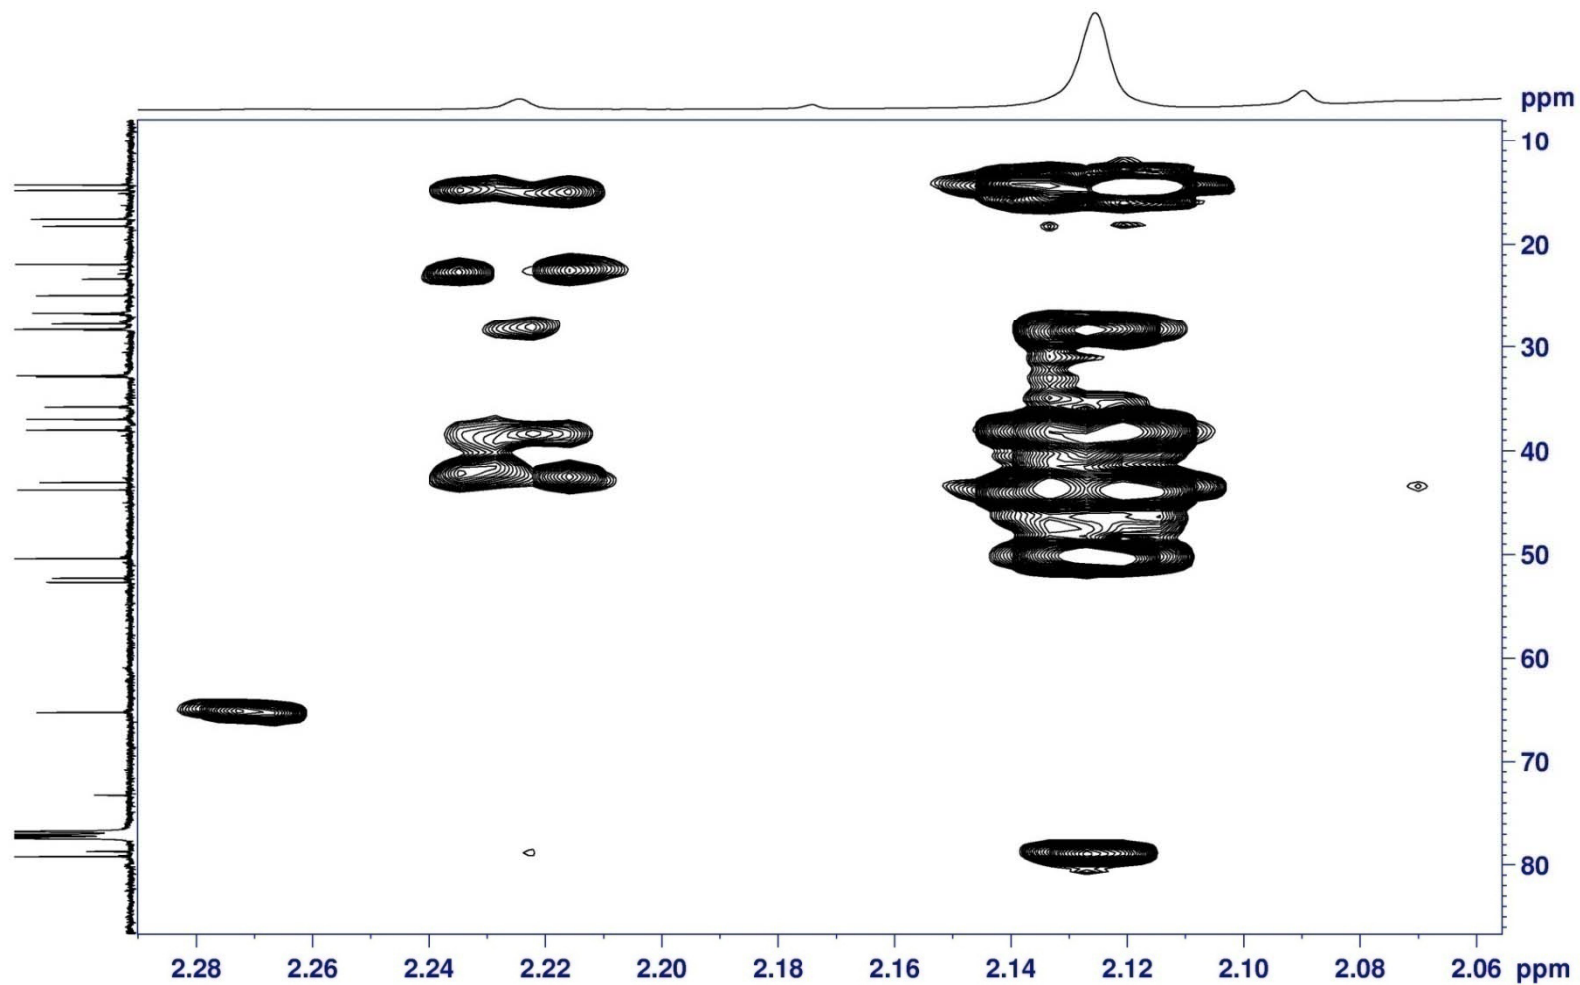



HMBC (400 MHz) spectrum of compound **6** in CDCl<sub>3</sub>

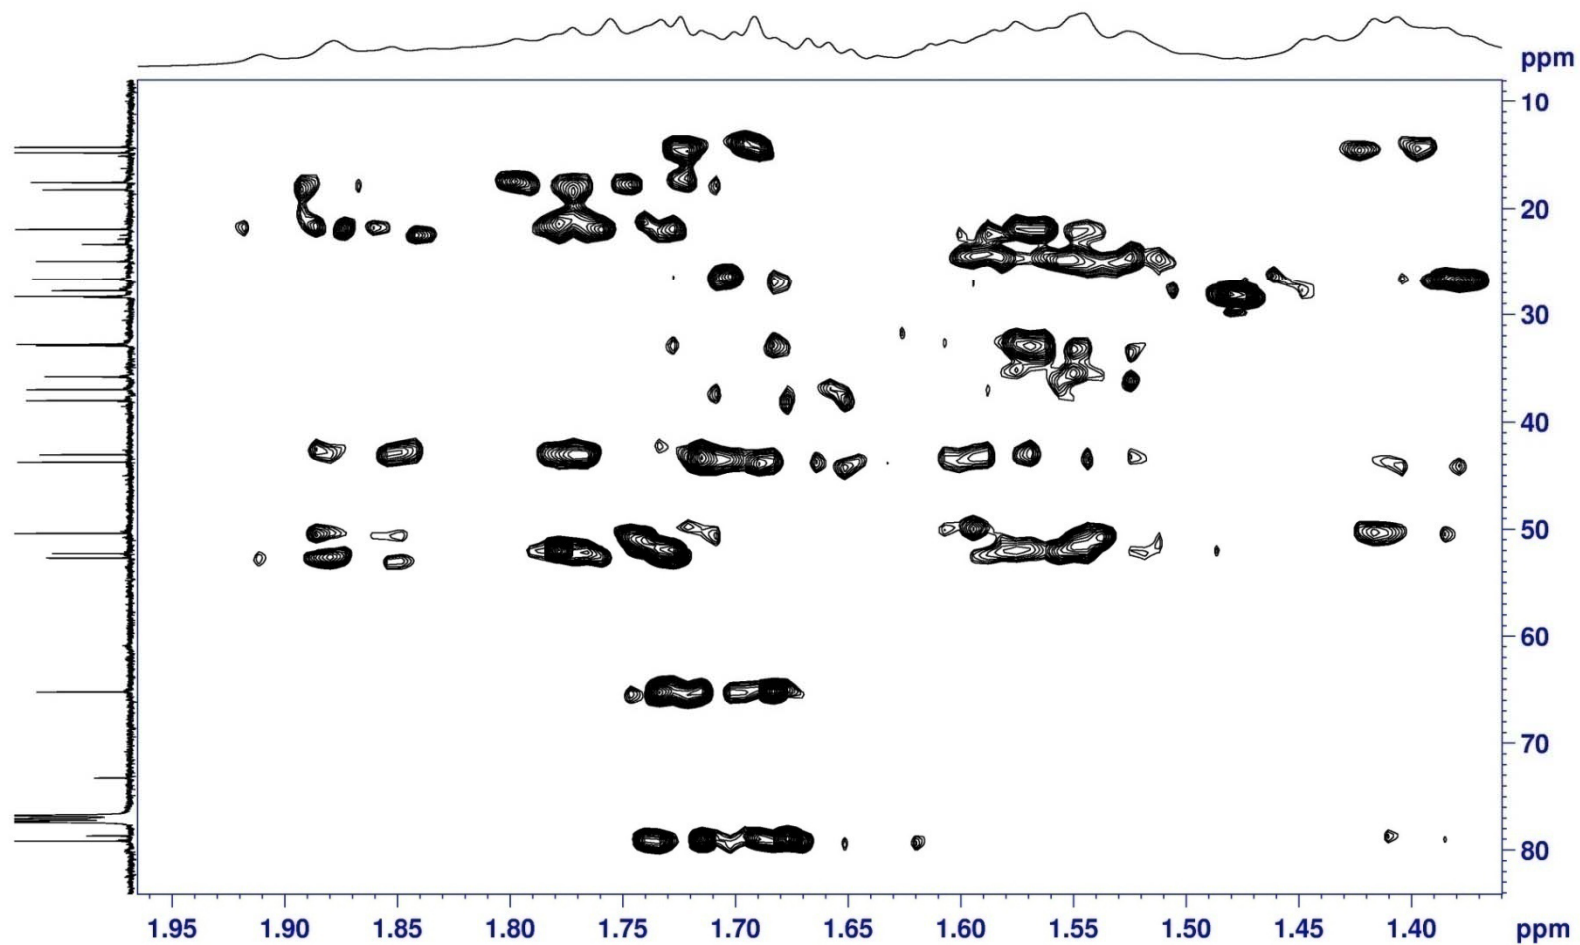

HMBC (400 MHz) spectrum of compound **6** in CDCl<sub>3</sub>

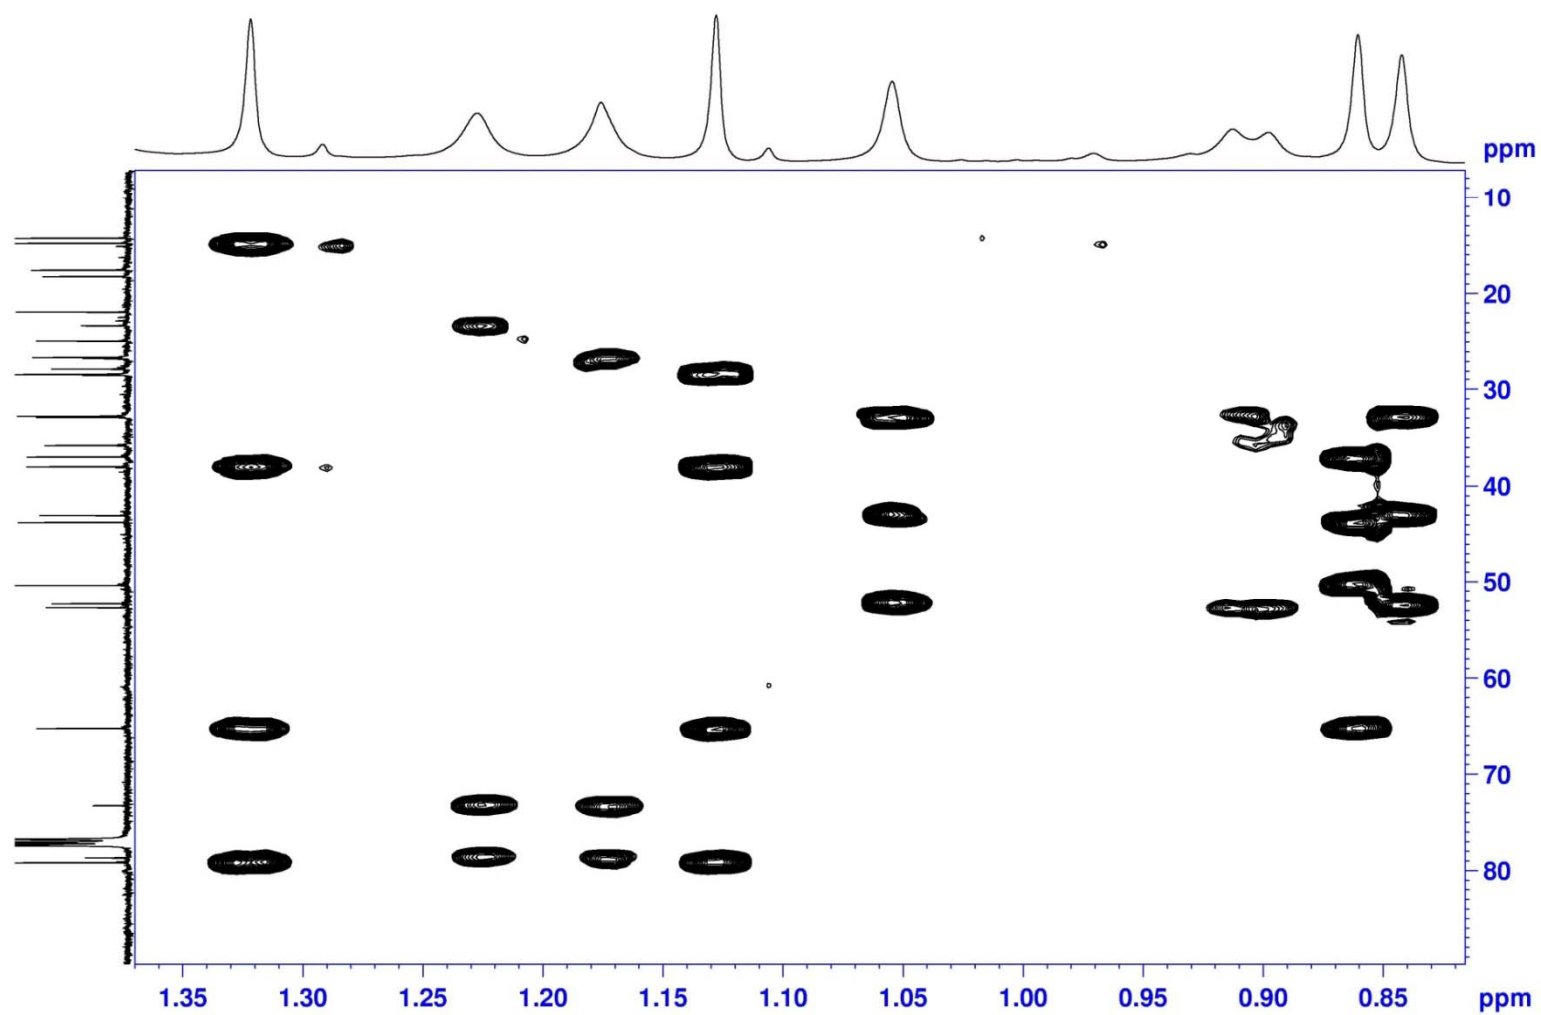

# NOESY (400 MHz) spectrum of compound **6** in CDCl<sub>3</sub>

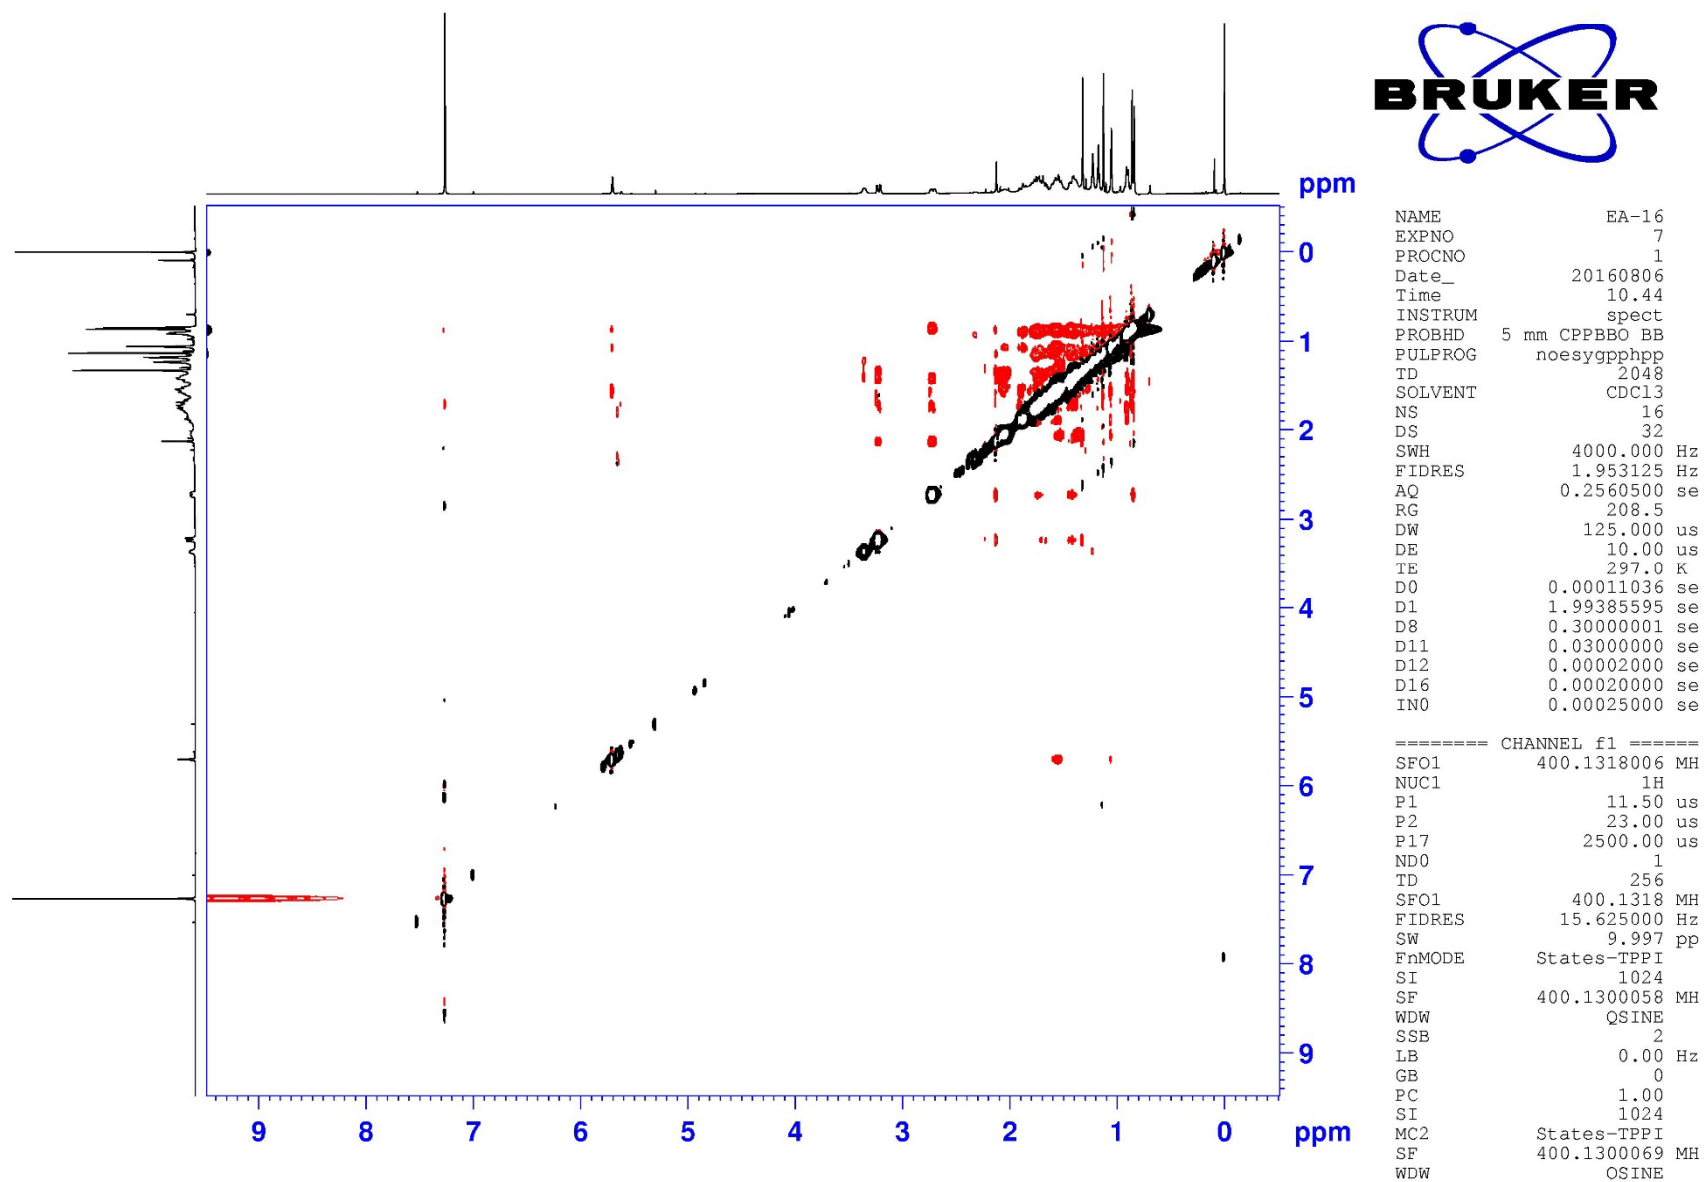

**S165**

NOESY (400 MHz) spectrum of compound **6** in CDCl<sub>3</sub>

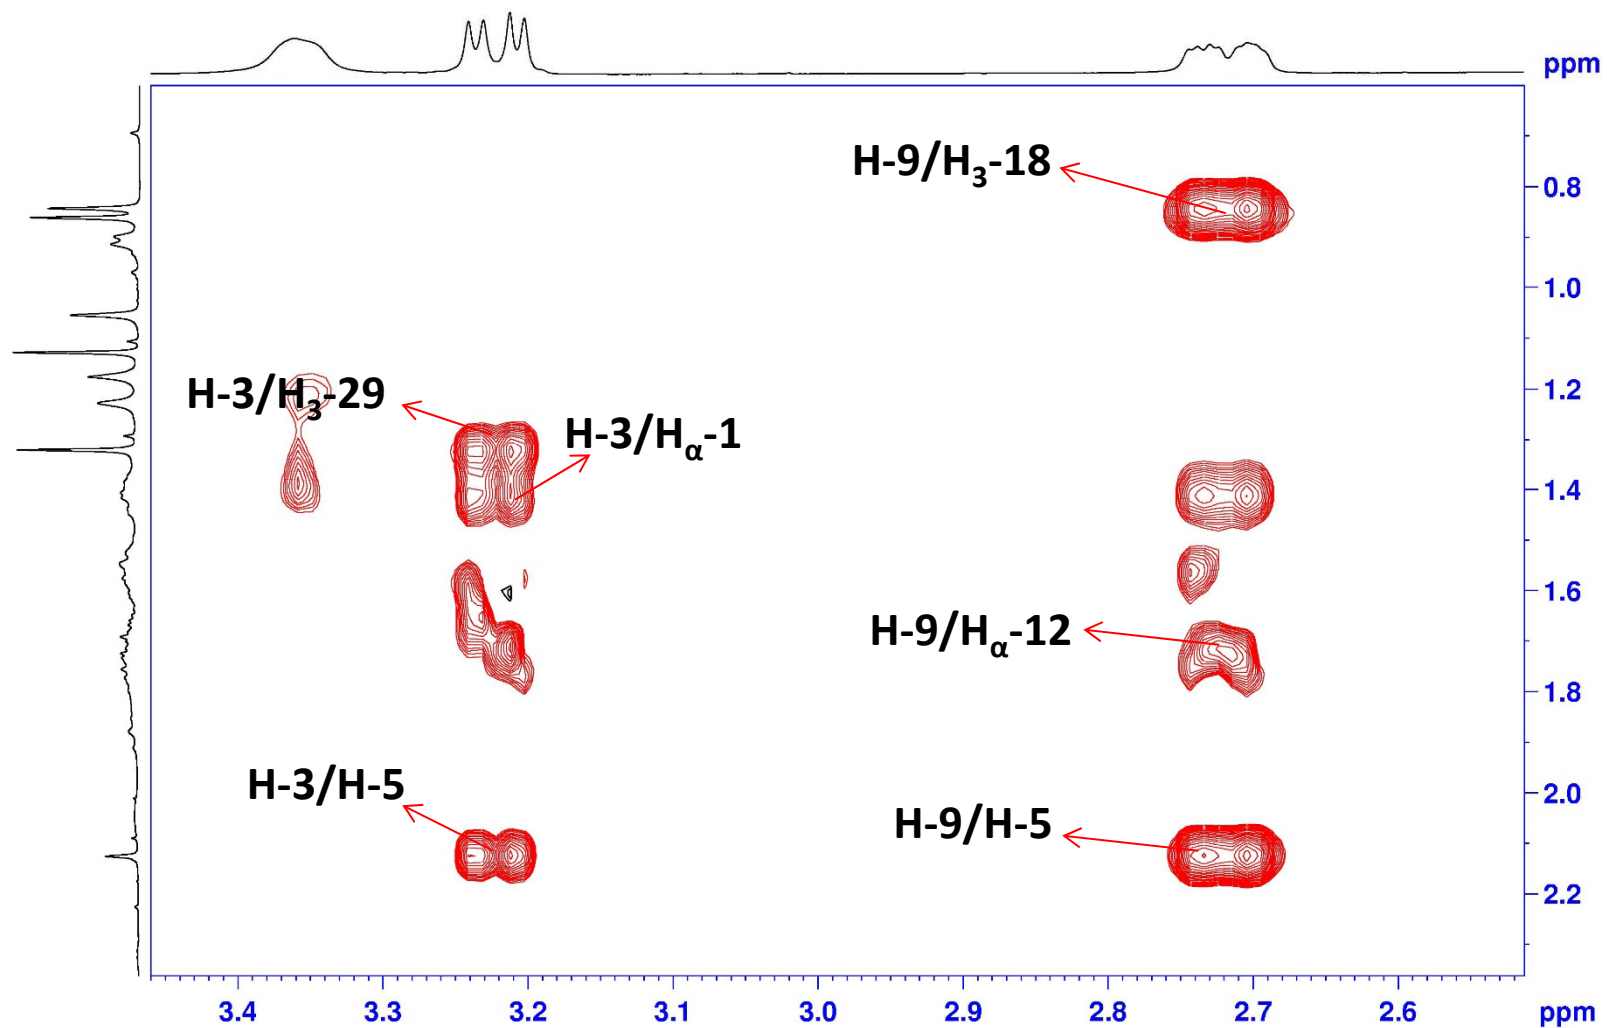

NOESY (400 MHz) spectrum of compound **6** in CDCl<sub>3</sub>

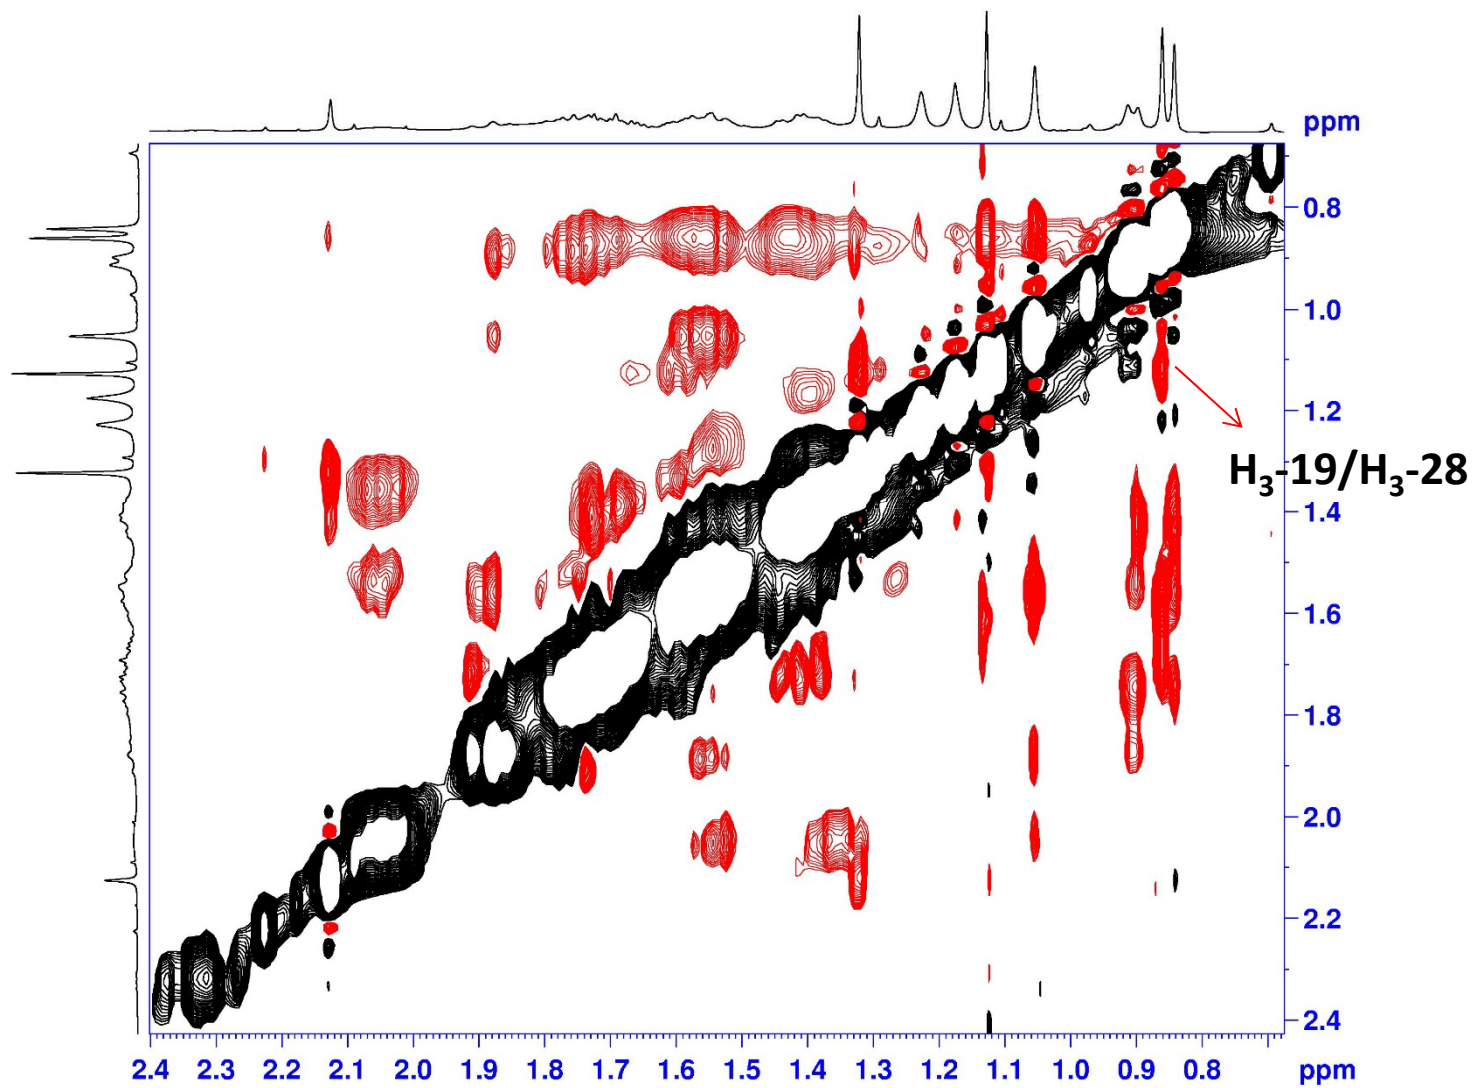

NOESY (400 MHz) spectrum of compound **6** in CDCl<sub>3</sub>

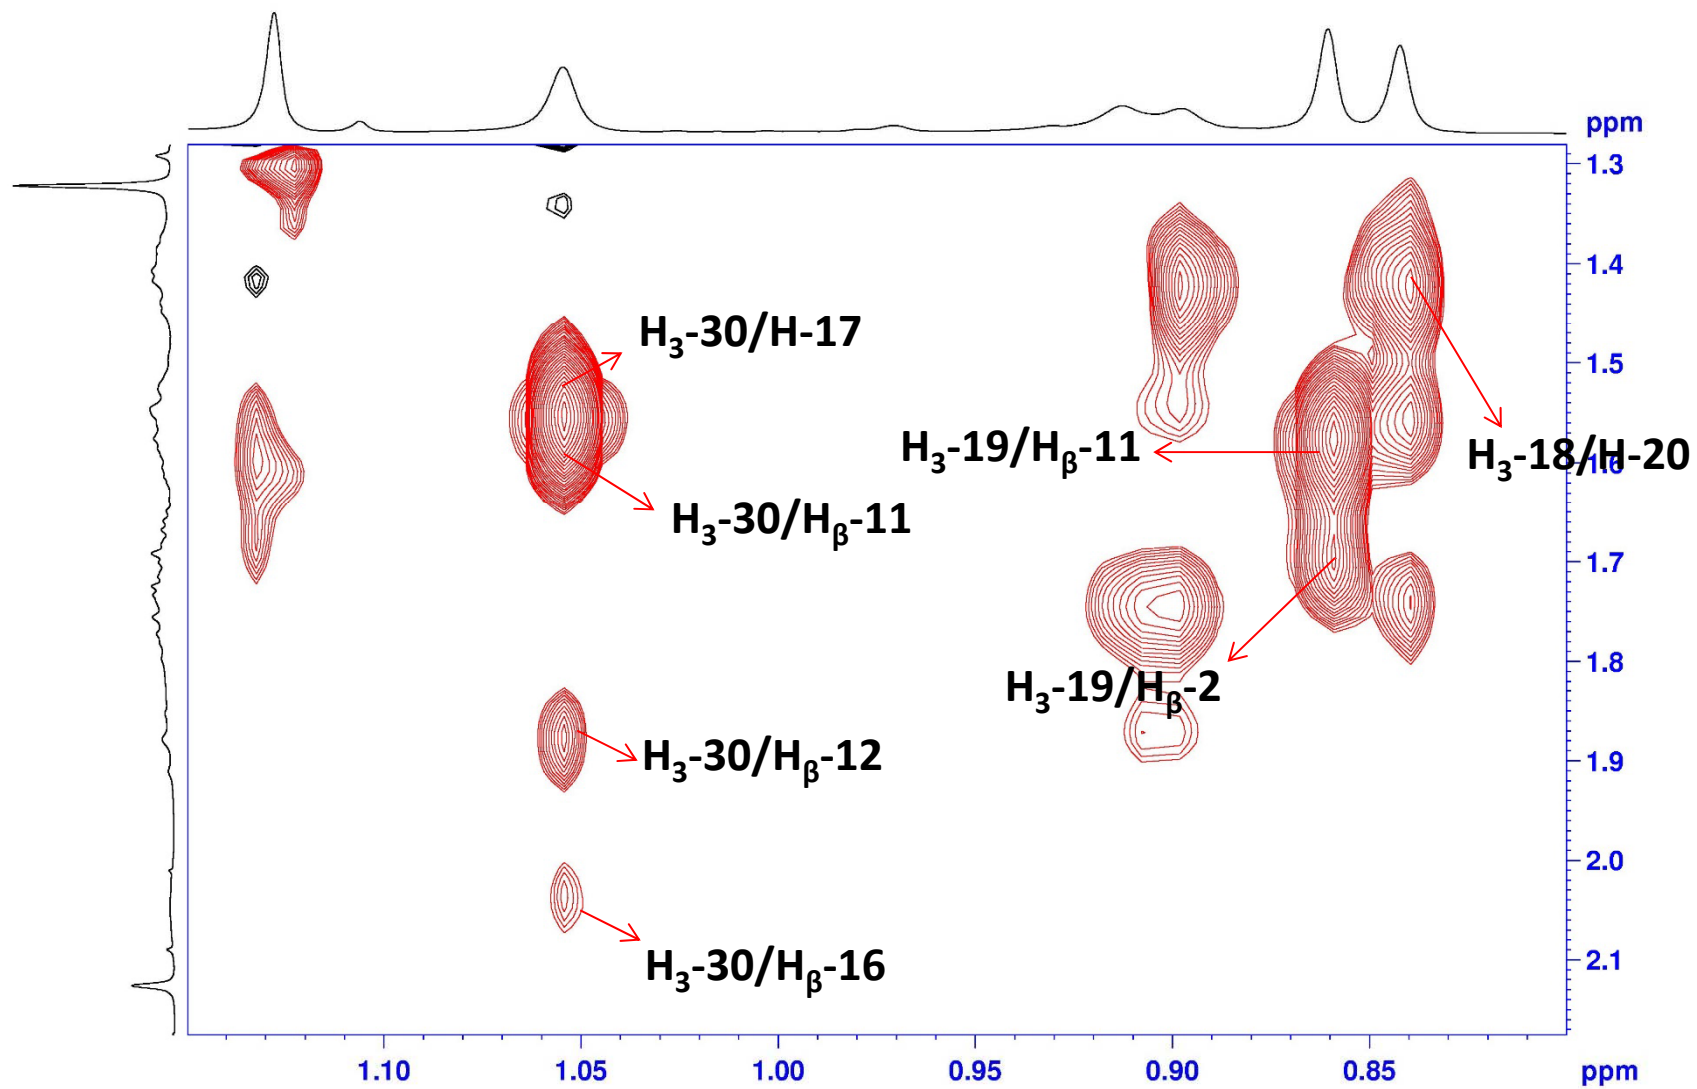

# HR-ESIMS for compound 7

## Generic Display Report

### Analysis Info

Analysis Name D:\Data\MS\data\201612\liwanshan\_EA-17\_pos\_26\_01\_2826.d  
Method LC\_Direct Infusion\_pos\_70-500mz.m  
Sample Name liwanshan\_EA-17\_pos  
Comment

Acquisition Date 12/21/2016 4:55:09 PM

Operator SCSIO  
Instrument maXis

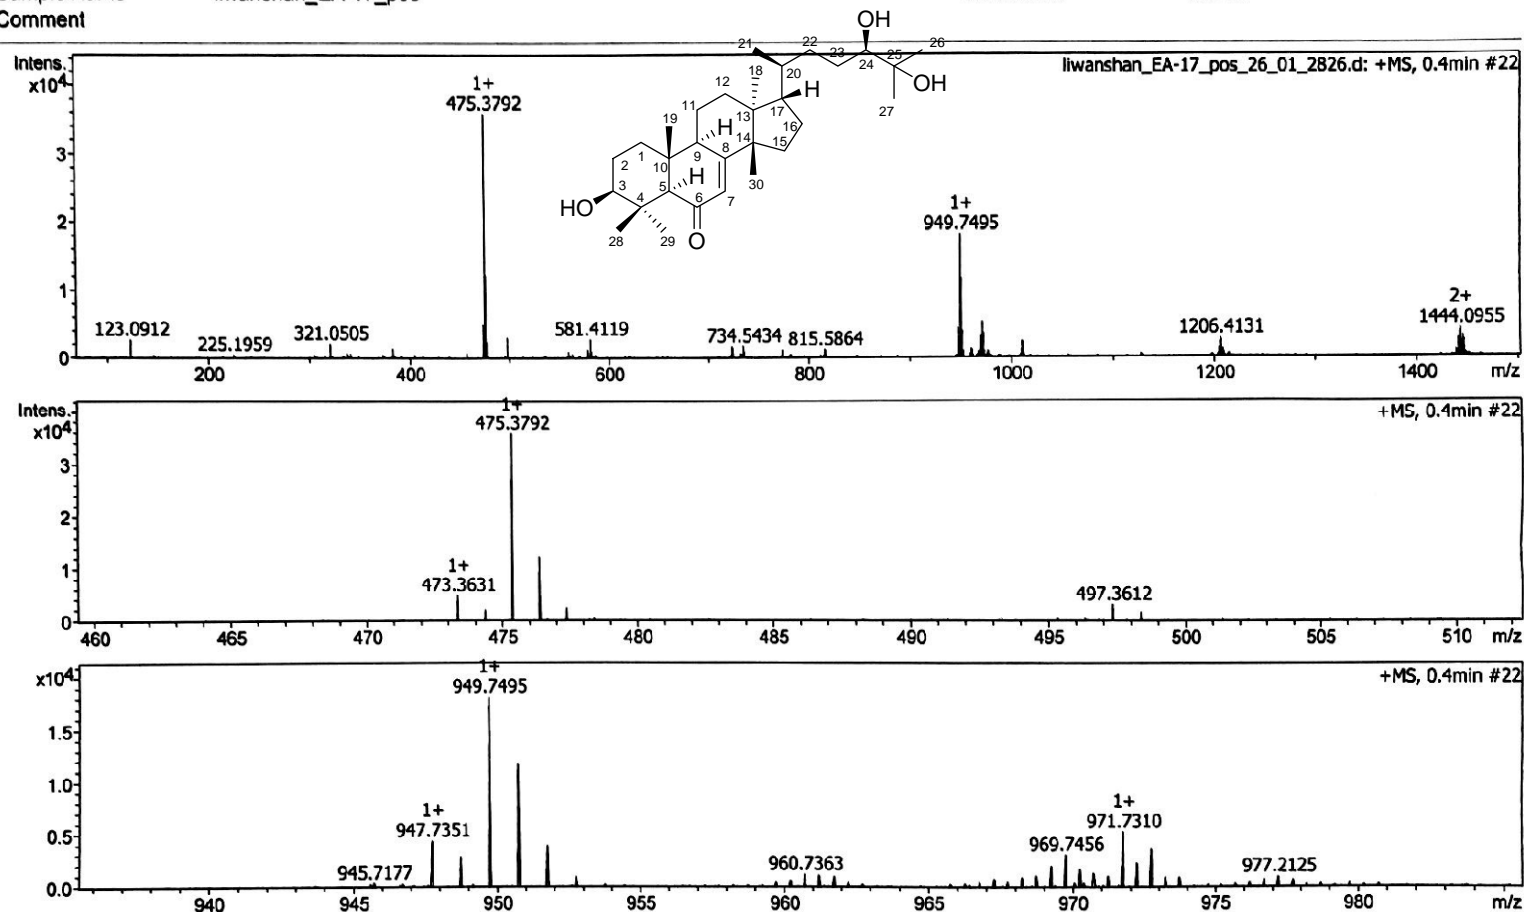



# HR-ESIMS for compound 7

## Mass Spectrum SmartFormula Report

### Analysis Info

Analysis Name D:\Data\MS\data\201612\liwanshan\_EA-17\_pos\_26\_01\_2826.d  
 Method LC\_Direct Infusion\_pos\_70-500mz.m  
 Sample Name liwanshan\_EA-17\_pos  
 Comment

Acquisition Date 12/21/2016 4:55:09 PM  
 Operator SCSIO  
 Instrument maXis 255552.00029

### Acquisition Parameter

|             |          |                      |          |                  |           |
|-------------|----------|----------------------|----------|------------------|-----------|
| Source Type | ESI      | Ion Polarity         | Positive | Set Nebulizer    | 0.4 Bar   |
| Focus       | Active   | Set Capillary        | 4500 V   | Set Dry Heater   | 180 °C    |
| Scan Begin  | 70 m/z   | Set End Plate Offset | -500 V   | Set Dry Gas      | 4.0 l/min |
| Scan End    | 1500 m/z | Set Charging Voltage | 0 V      | Set Divert Valve | Waste     |
|             |          | Set Corona           | 0 nA     | Set APCI Heater  | 0 °C      |

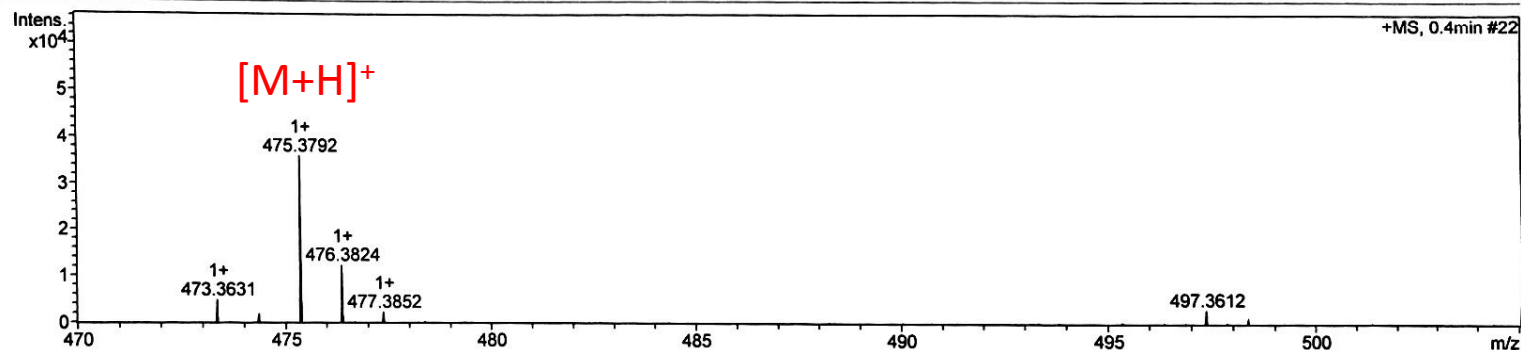

| Meas. m/z  | # | Ion Formula | Score  | m/z        | err [ppm] | err [mDa] | mSigma | rdb  | e <sup>-</sup> Conf | N-Rule |
|------------|---|-------------|--------|------------|-----------|-----------|--------|------|---------------------|--------|
| 475.379226 | 1 | C30H51O4    | 100.00 | 475.378187 | 2.2       | 1.0       | 6.3    | 5.5  | even                | ok     |
| 497.361232 | 1 | C30H50NaO4  | 100.00 | 497.360131 | -2.2      | -1.1      | 20.8   | 5.5  | even                | ok     |
| 949.749486 | 1 | C60H101O8   | 100.00 | 949.749097 | 0.4       | 0.4       | 9.2    | 10.5 | even                | ok     |
| 971.730951 | 1 | C60H100NaO8 | 100.00 | 971.731041 | -0.1      | -0.1      | 25.7   | 10.5 | even                | ok     |

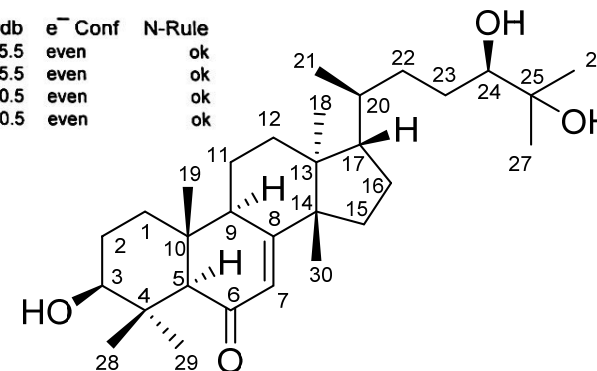

liwanshan\_EA-17\_pos\_26\_01\_2826.d

Bruker Compass DataAnalysis 4.1

printed: 12/21/2016 4:59:28 PM

by: SCSIO

Page 1 of 1

S170



$^1\text{H}$  NMR (400 MHz) spectrum of compound **7** in  $\text{CDCl}_3$

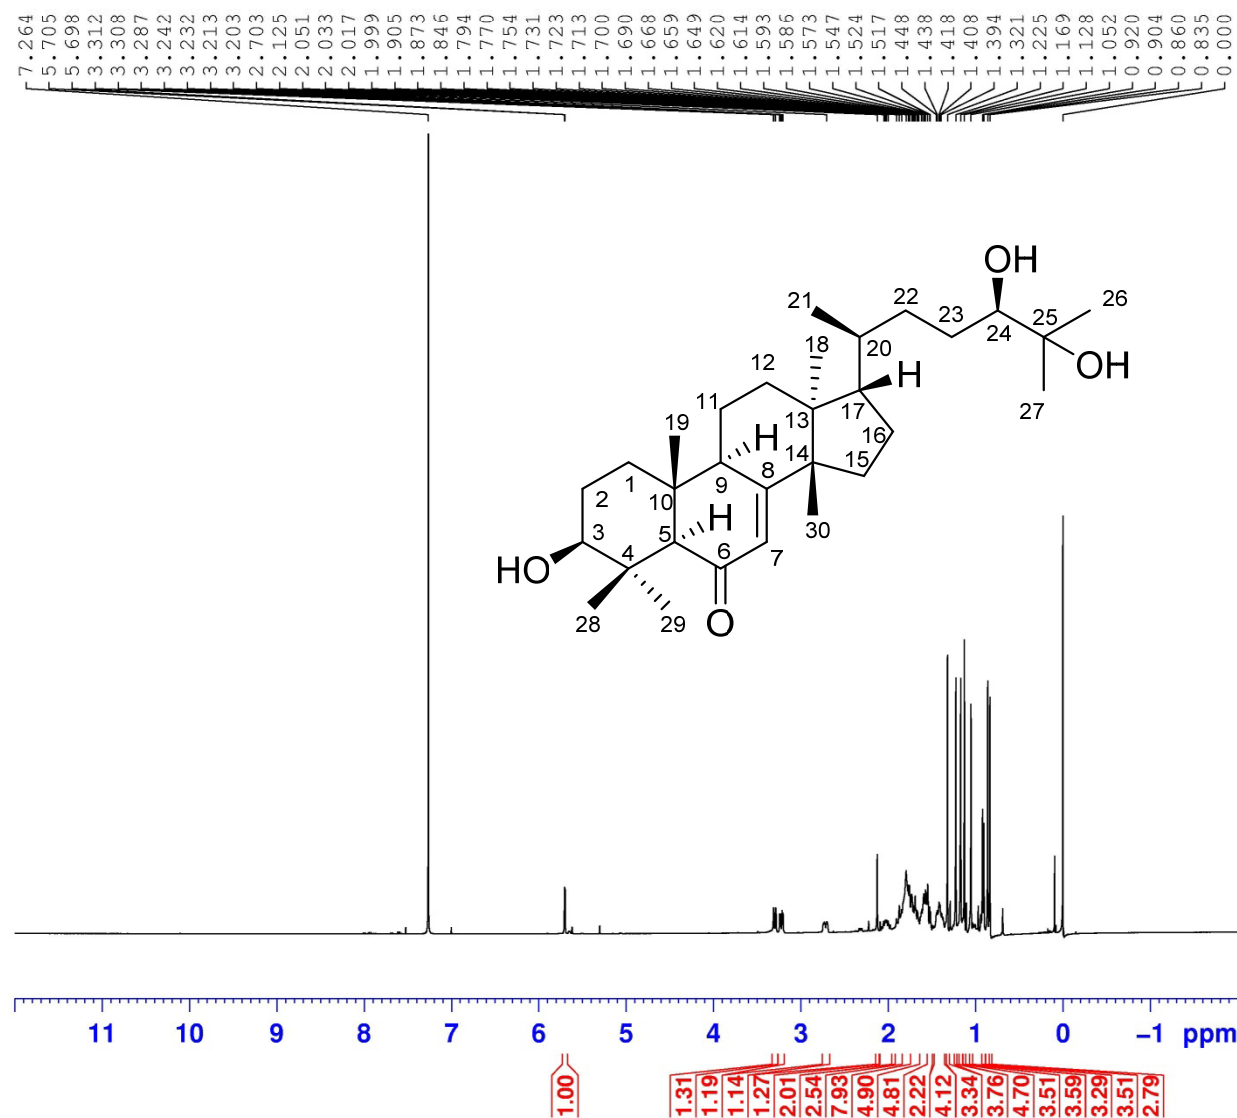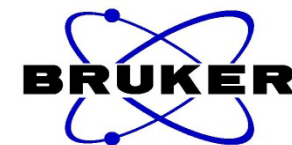

```

NAME          EA-17
EXPNO          1
PROCNO         1
Date_          20160726
Time           12.53
INSTRUM        spect
PROBHD         5 mm CPPBBO BB
PULPROG        zg30
TD             65536
SOLVENT        CDCl3
NS             16
DS             2
SWH            8223.685 Hz
FIDRES         0.125483 Hz
AQ            3.9846387 sec
RG            147.94
DW            60.800 usec
DE            10.00 usec
TE            297.0 K
D1            1.00000000 sec
TD0           1
  
```

```

===== CHANNEL f1 =====
SFO1         400.1324710 MHz
NUC1          1H
P1           11.50 usec
SI           65536
SF           400.1300079 MHz
WDW           EM
SSB           0
LB           0.30 Hz
GB           0
PC           1.00
  
```

$^1\text{H}$  NMR (400 MHz) spectrum of compound **7** in  $\text{CDCl}_3$

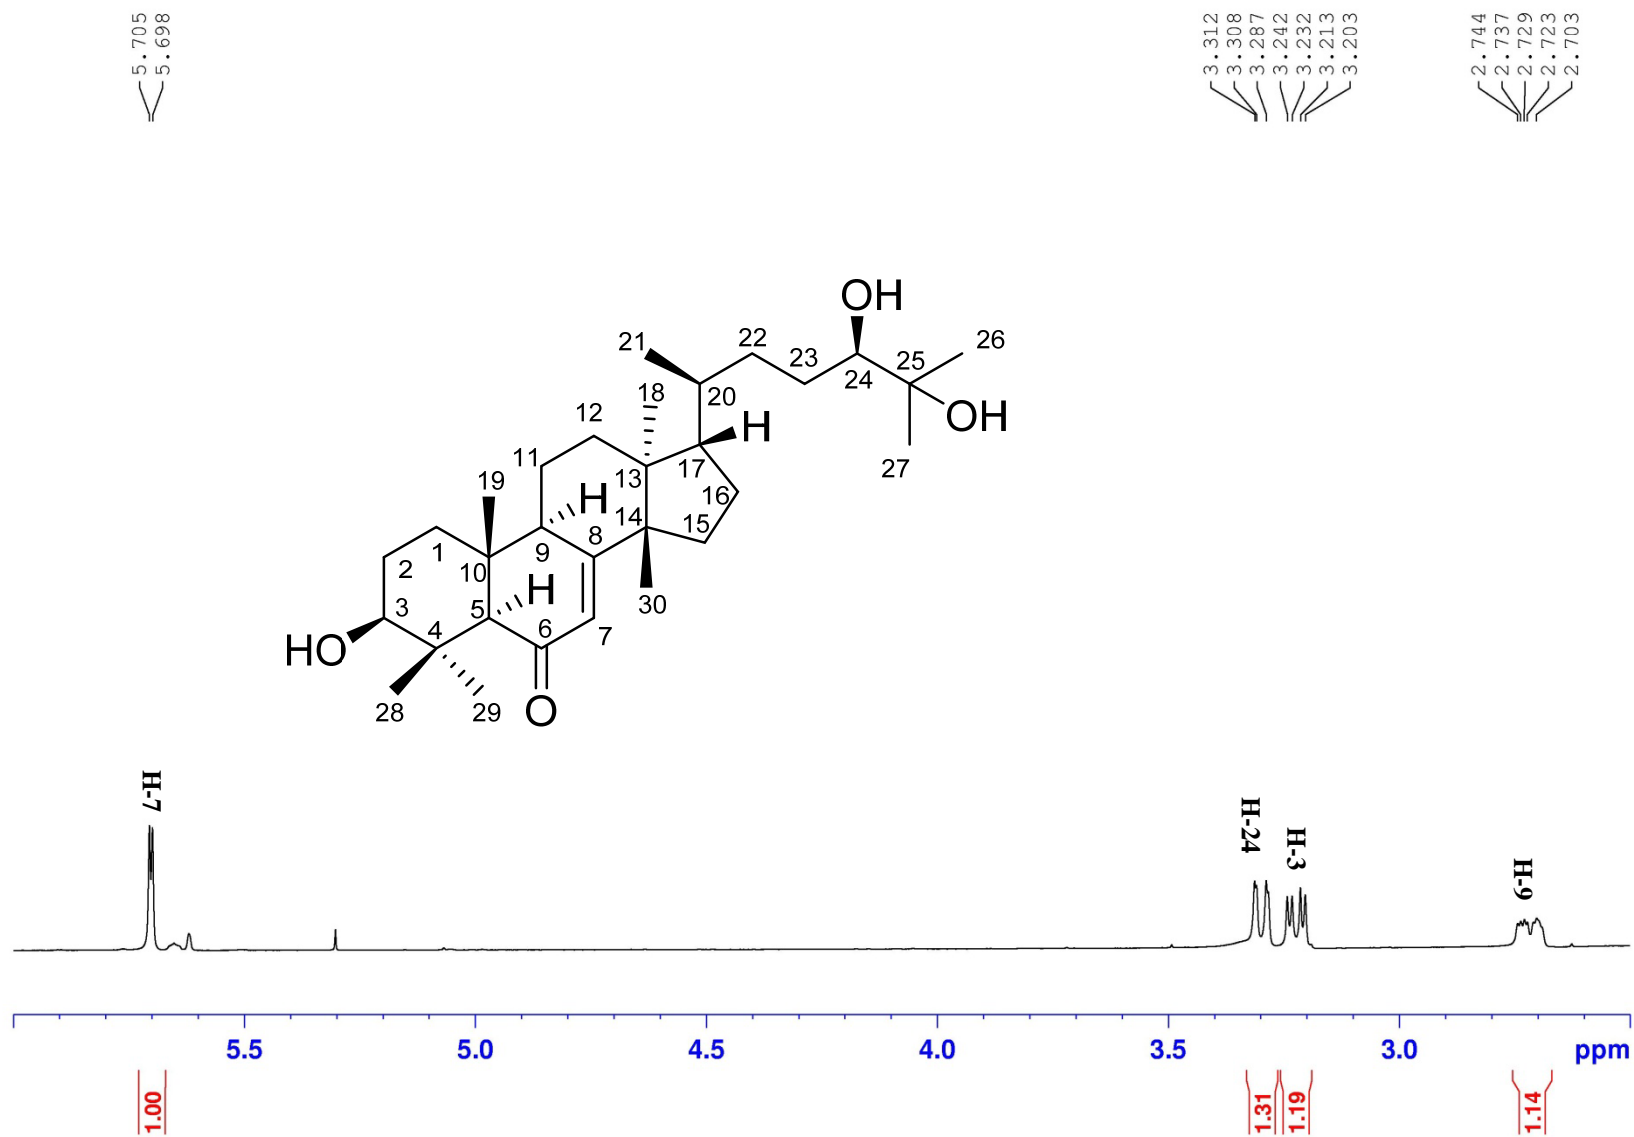

$^1\text{H}$  NMR (400 MHz) spectrum of compound **7** in  $\text{CDCl}_3$

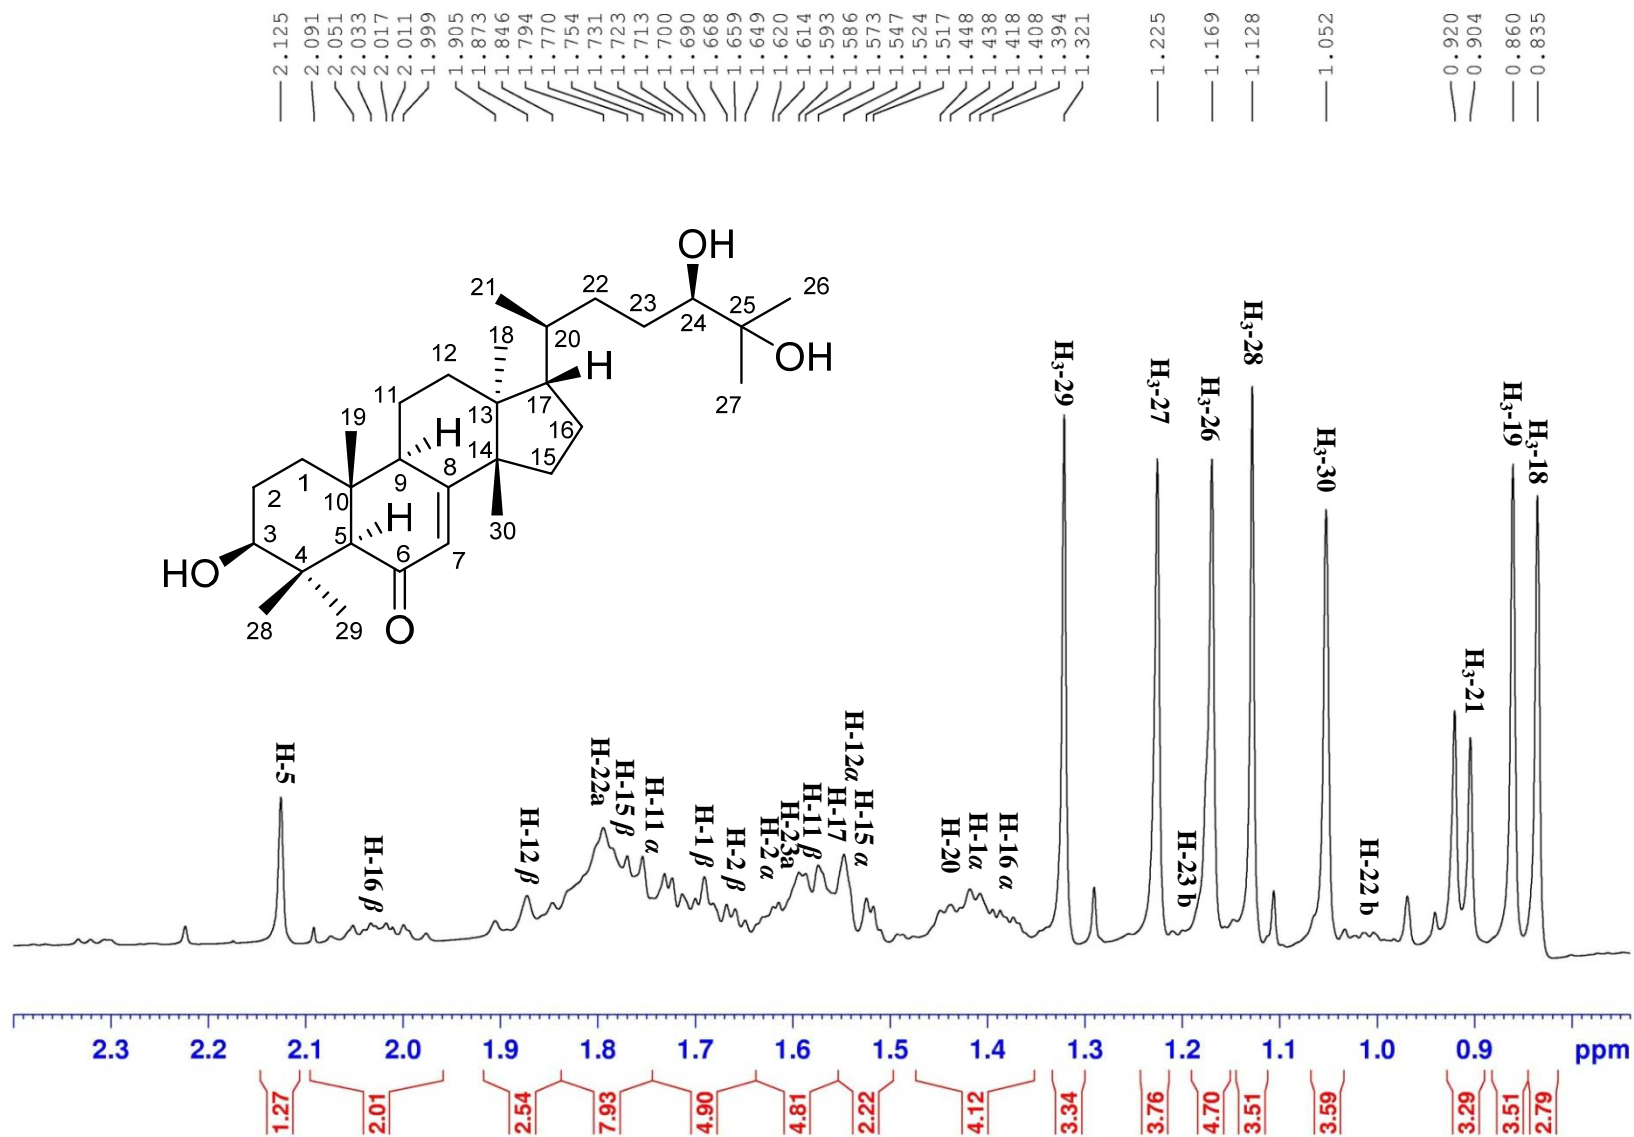

$^{13}\text{C}$  NMR (100 MHz) spectrum of compound **7** in  $\text{CDCl}_3$

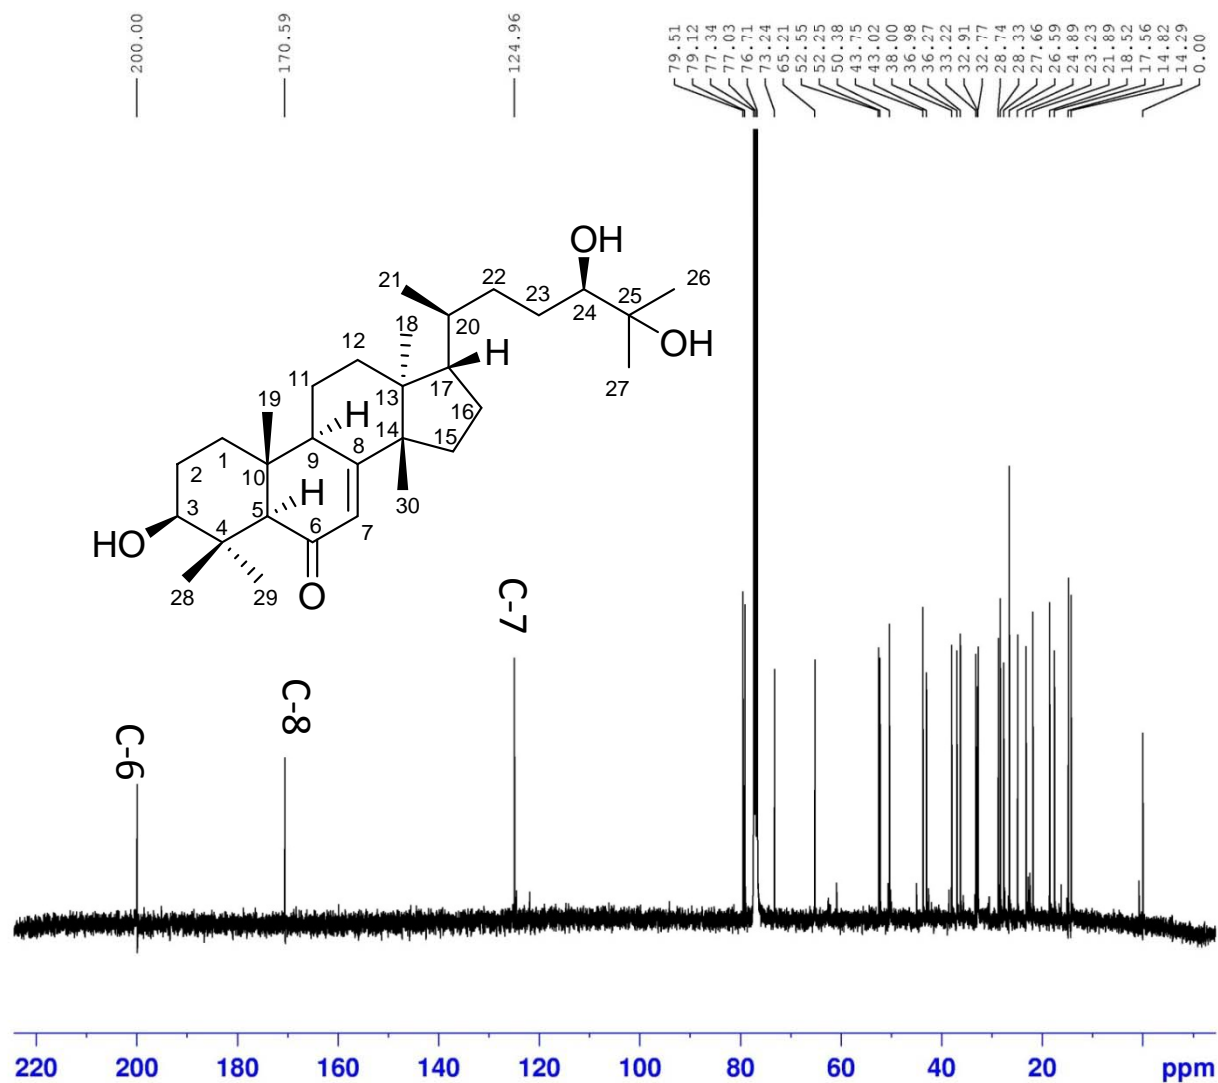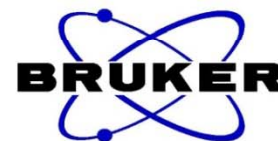

NAME EA-17  
 EXPNO 102  
 PROCNO 1  
 Date\_ 20160727  
 Time 0.54  
 INSTRUM spect  
 PROBHD 5 mm CPPBBO BB  
 PULPROG zgpg30  
 TD 65536  
 SOLVENT  $\text{CDCl}_3$   
 NS 1024  
 DS 4  
 SWH 24038.461 Hz  
 FIDRES 0.366798 Hz  
 AQ 1.3631988 sec  
 RG 102.3  
 DW 20.800 usec  
 DE 18.00 usec  
 TE 297.0 K  
 D1 2.00000000 sec  
 D11 0.03000000 sec  
 TD0 1

===== CHANNEL f1 =====  
 SFO1 100.6233324 MHz  
 NUC1  $^{13}\text{C}$   
 P1 10.00 usec  
 SI 32768  
 SF 100.6127690 MHz  
 WDW EM  
 SSB 0  
 LB 1.00 Hz  
 GB 0  
 PC 1.40

$^{13}\text{C}$  NMR (100 MHz) spectrum of compound **7** in  $\text{CDCl}_3$

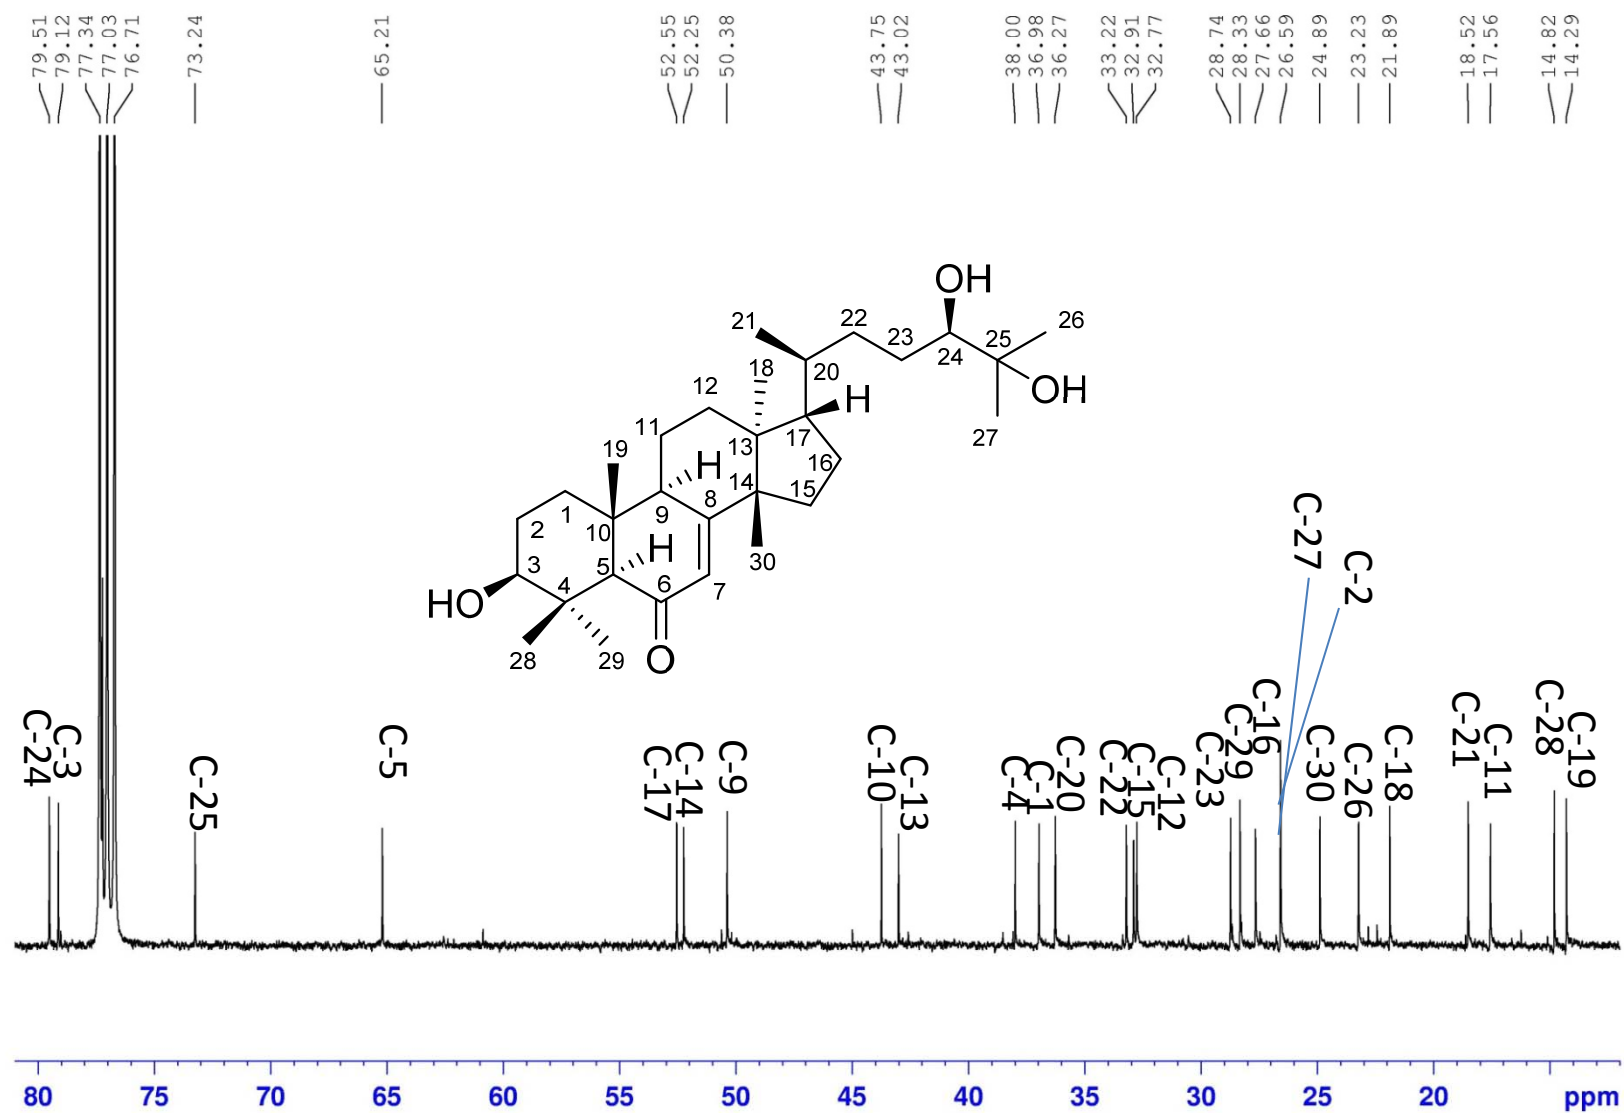

# DEPT135 (100 MHz) spectrum of compound **7** in CDCl<sub>3</sub>

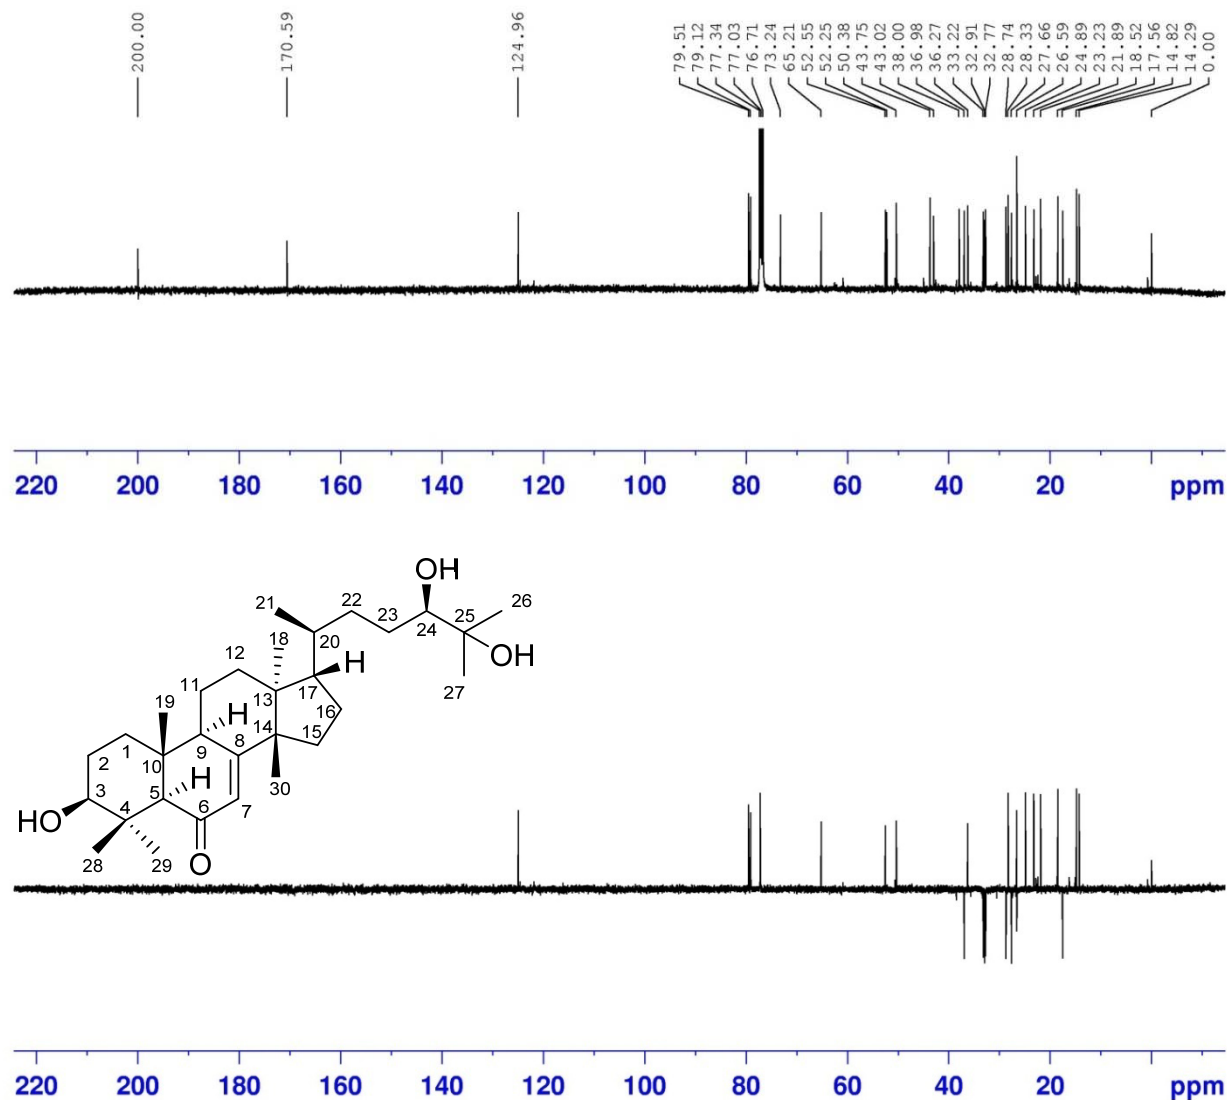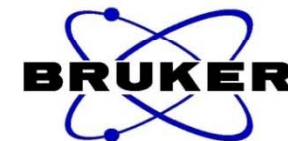

```

NAME          EA-17
EXPNO          103
PROCNO         1
Date_         20160727
Time          1.12
INSTRUM        spect
PROBHD         5 mm CPPBBO BB
PULPROG        deptsp135
TD             65536
SOLVENT        CDCl3
NS             300
DS             4
SWH           24038.461 Hz
FIDRES        0.366798 Hz
AQ            1.3631988 sec
RG            130.26
DW            20.800 usec
DE            18.00 usec
TE            297.0 K
CNST2         145.0000000
D1            2.00000000 sec
D2            0.00344828 sec
D12           0.00002000 sec
TD0           1
  
```

```

===== CHANNEL f1 =====
SF01         100.6233324 MHz
NUC1          13C
P1            10.00 usec
P13           2000.00 usec
SI            32768
SF            100.6127690 MHz
WDW           EM
SSB           0
LB            1.00 Hz
GB            0
PC            1.40
  
```

DEPT135 (100 MHz) spectrum of compound **7** in CDCl<sub>3</sub>

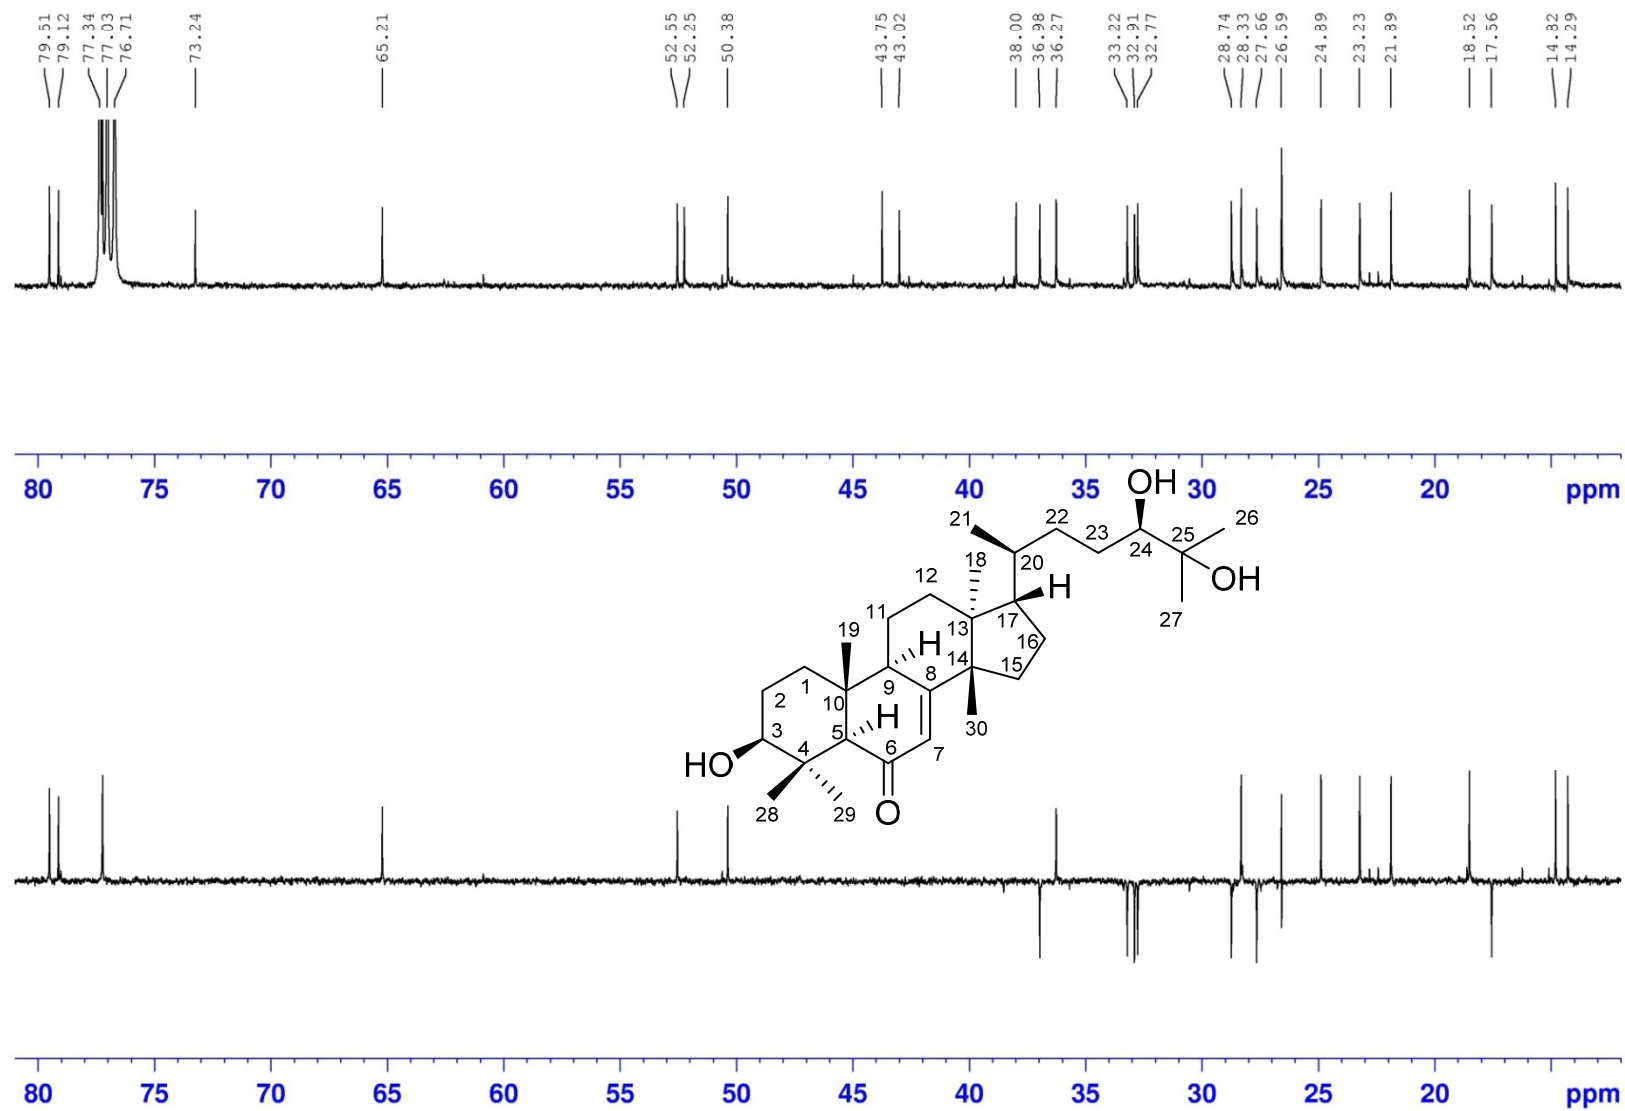

$^1\text{H}$ - $^1\text{H}$  COSY (400 MHz) spectrum of compound **7** in  $\text{CDCl}_3$

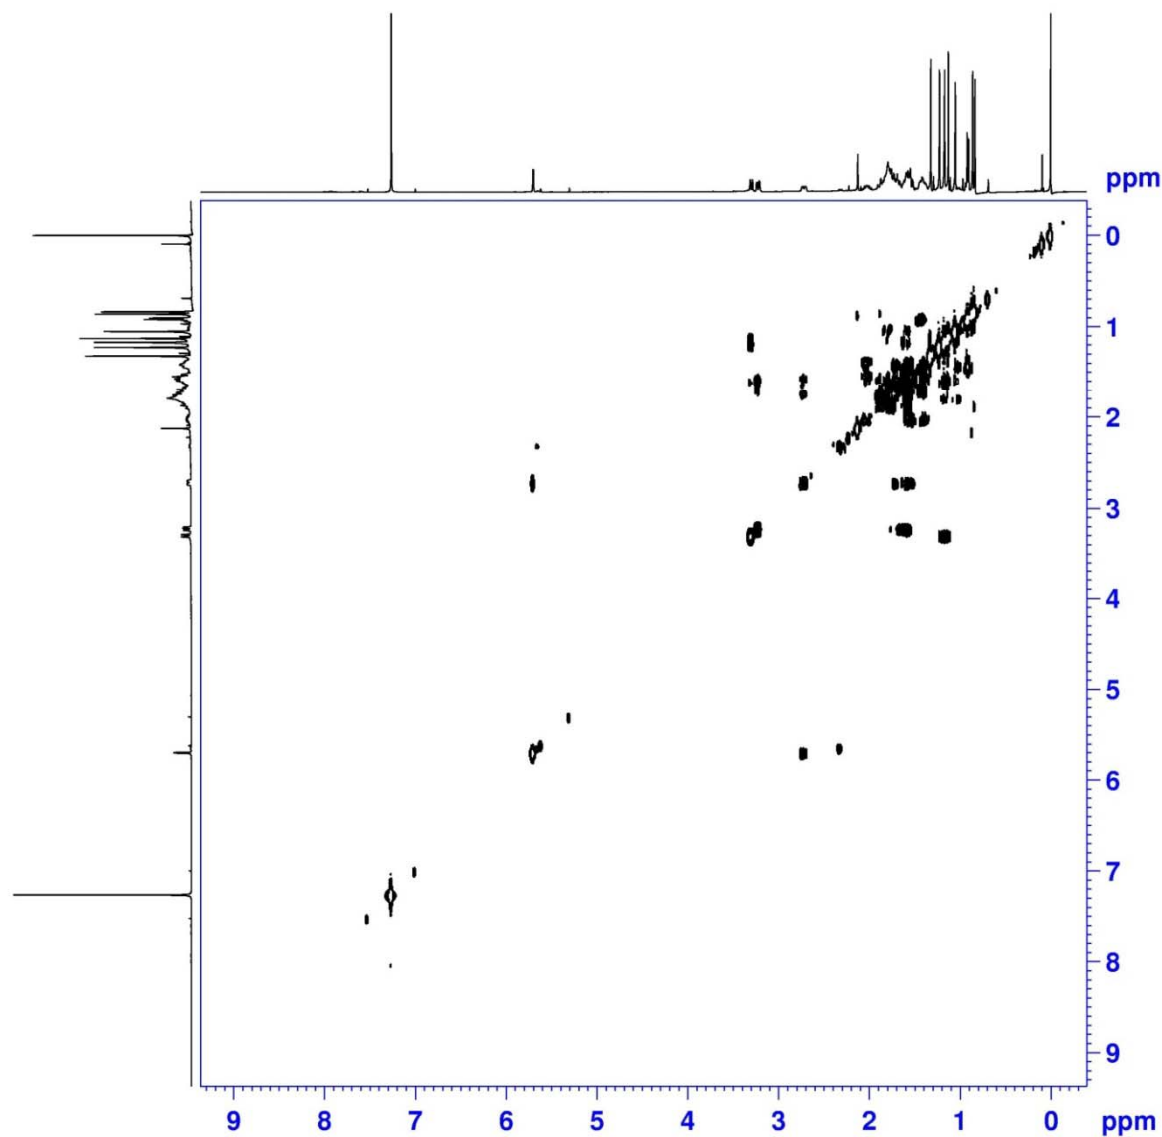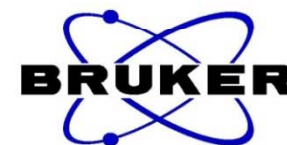

```

NAME          EA-17
EXPNO          104
PROCNO         1
Date_          20160805
Time           22.10
INSTRUM        spect
PROBHD         5 mm CPPBBO BB
PULPROG        cosygpppgf
TD             2048
SOLVENT        CDCl3
NS              8
DS              8
SWH            3906.250 Hz
FIDRES         1.907349 Hz
AQ             0.2621940 sec
RG             208.5
DW             128.000 usec
DE             10.00 usec
TE             297.0 K
D0             0.00000300 sec
D1             1.89678097 sec
D11            0.03000000 sec
D12            0.00002000 sec
D13            0.00000400 sec
D16            0.00020000 sec
IN0            0.00025600 sec
  
```

```

===== CHANNEL f1 =====
SFO1          400.1318006 MHz
NUC1           1H
P0             11.50 usec
P1             11.50 usec
P17            2500.00 usec
ND0            1
TD             128
SFO1          400.1318 MHz
FIDRES         30.517578 Hz
SW             9.762 ppm
FnMODE         QF
SI             1024
SF             400.1300058 MHz
WDW            QSINE
SSB            0
LB             0.00 Hz
GB             0
PC             1.40
SI             1024
MC2            QF
SF             400.1300047 MHz
WDW            QSINE
SSB            0
  
```



$^1\text{H}$ - $^1\text{H}$  COSY (400 MHz) spectrum of compound **7** in  $\text{CDCl}_3$

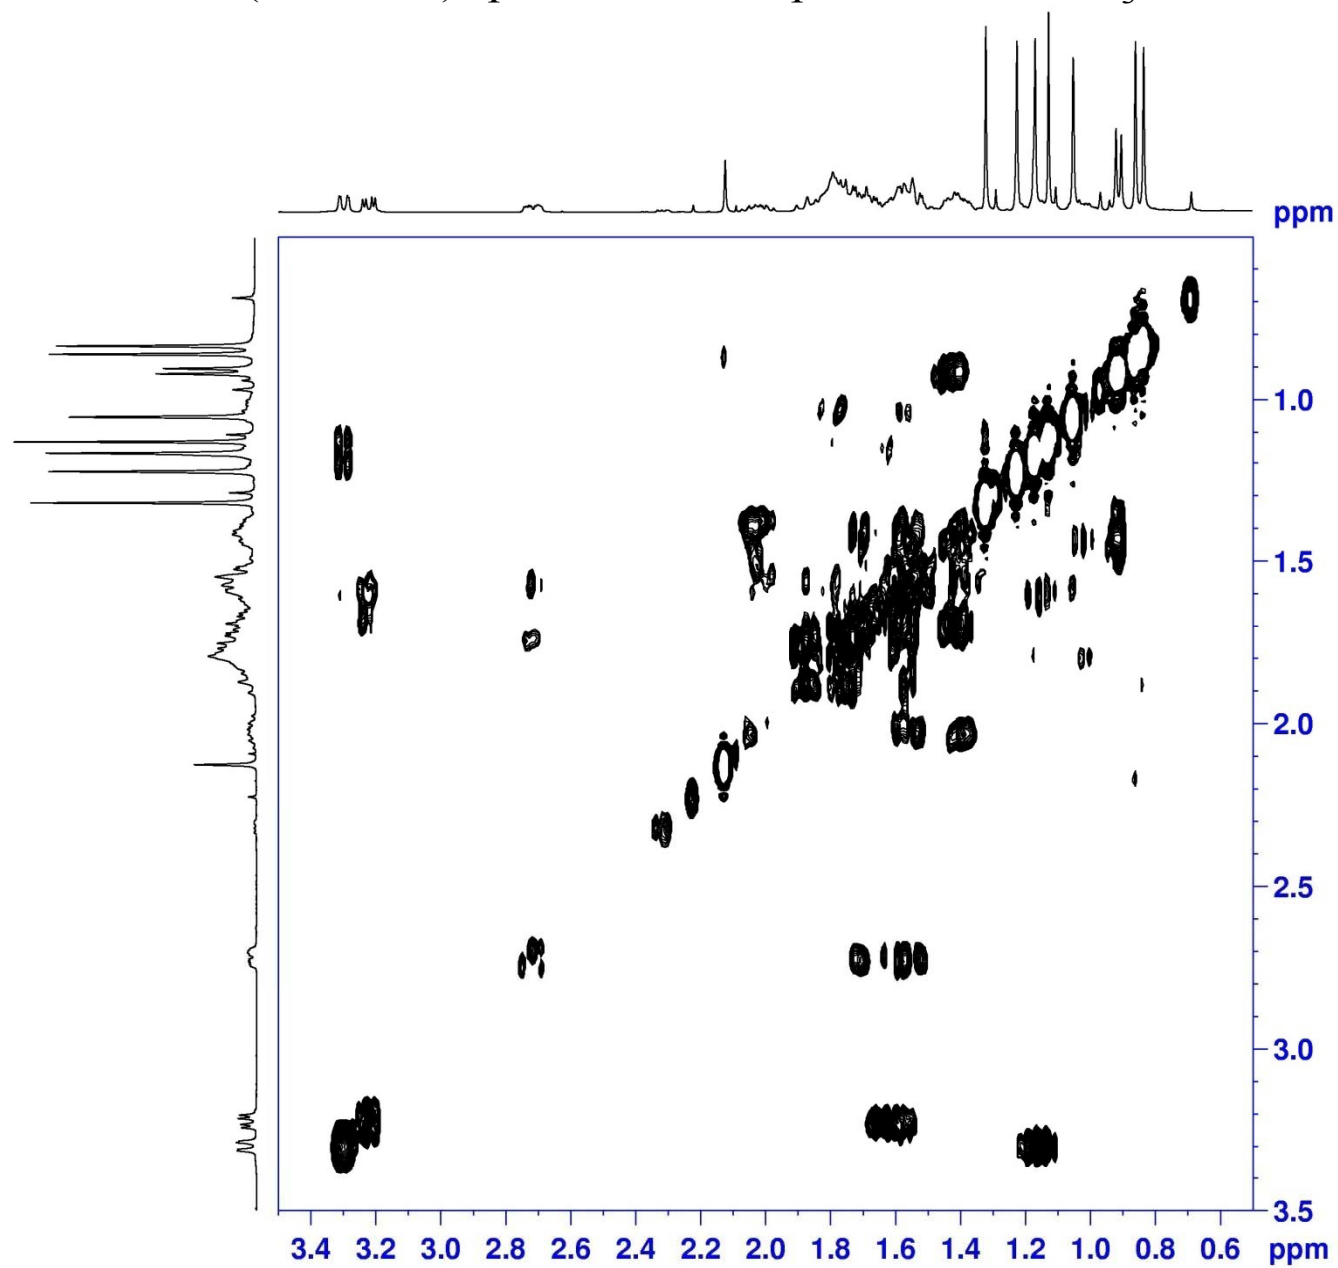

$^1\text{H}$ - $^1\text{H}$  COSY (400 MHz) spectrum of compound **7** in  $\text{CDCl}_3$

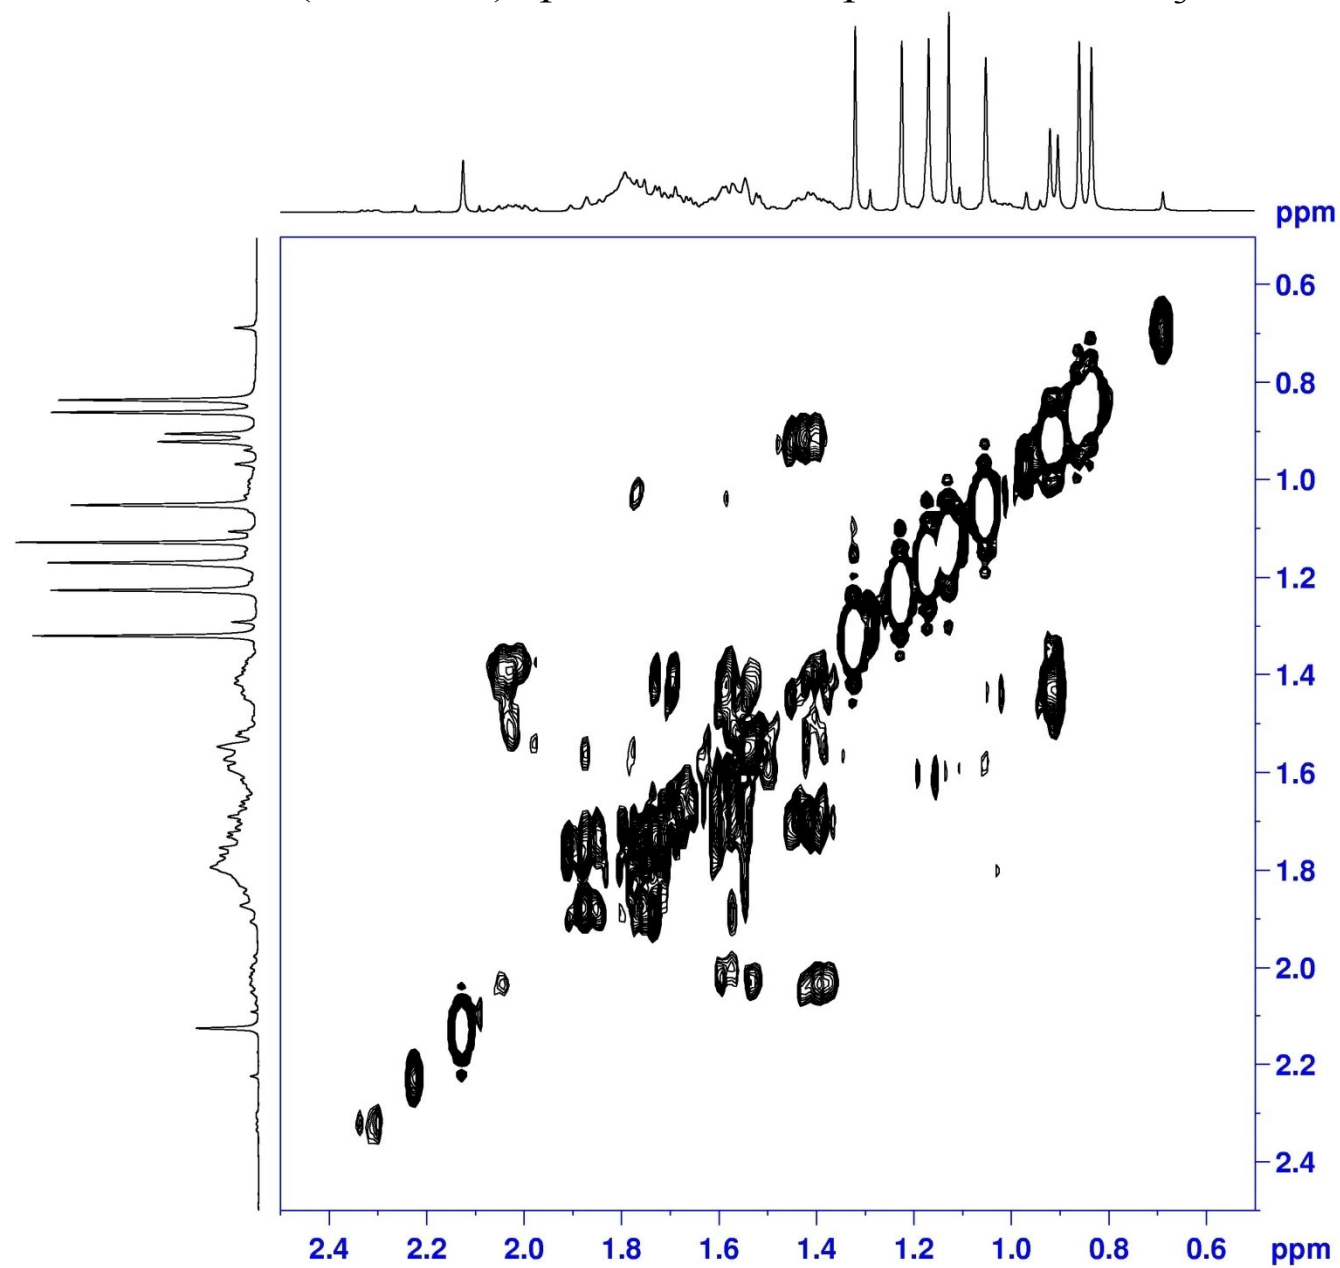

# HSQC (400 MHz) spectrum of compound **7** in CDCl<sub>3</sub>

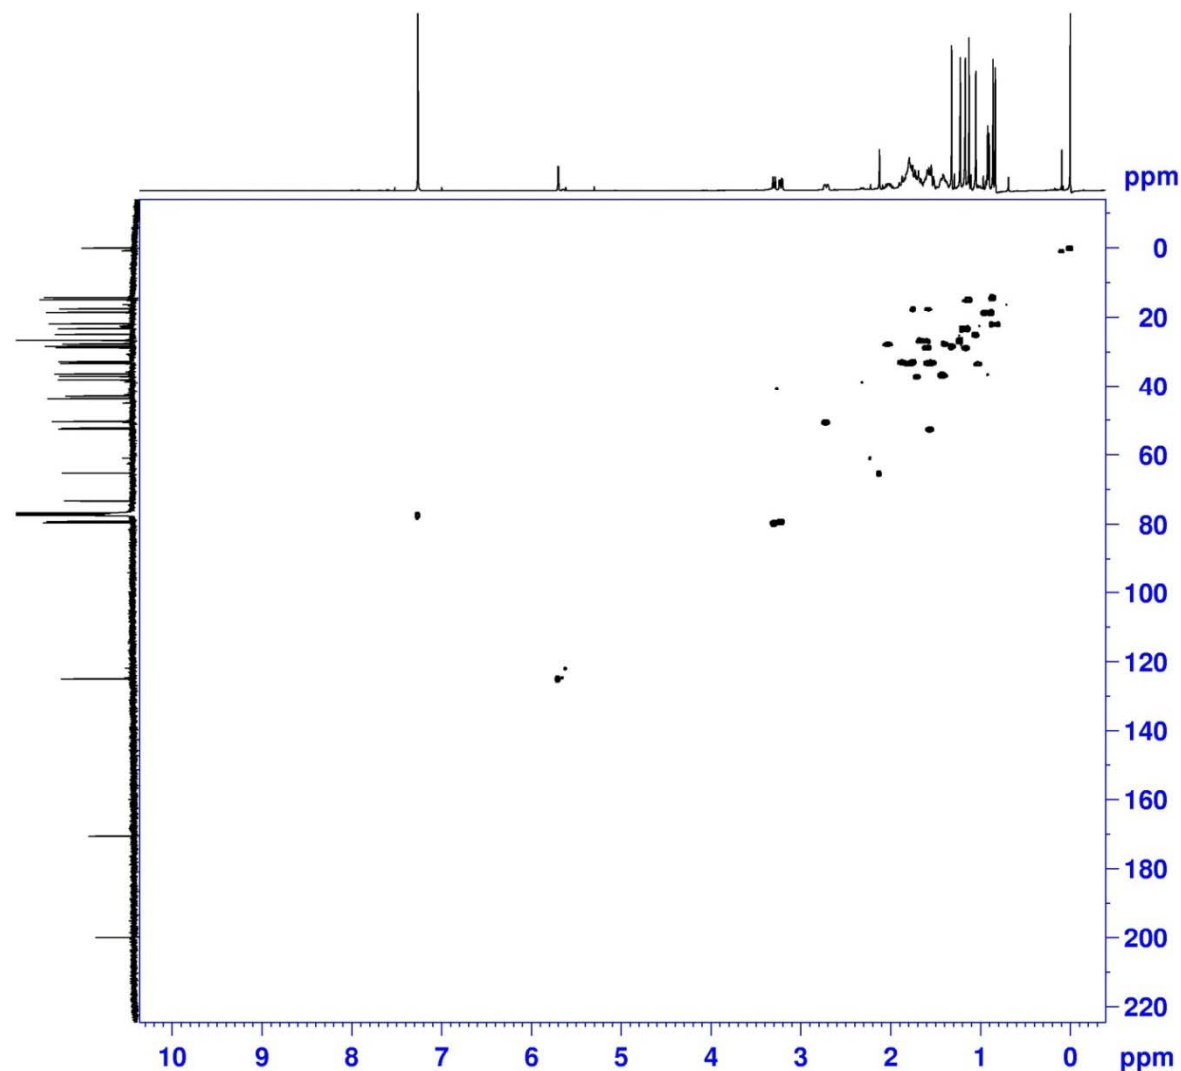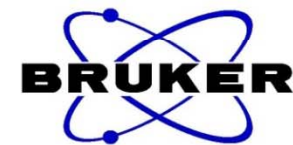

```

NAME          EA-17
EXPNO         105
PROCNO        1
Date_         20160805
Time          22.50
INSTRUM       spect
PROBHD        5 mm CPPBBO BB
PULPROG       hsqcetgpsi2
TD            1024
SOLVENT       CDCl3
NS            16
DS            16
SWH           4302.926 Hz
FIDRES        4.202076 Hz
AQ            0.1190388 sec
RG            208.5
DW            116.200 usec
DE            10.00 usec
TE            297.0 K
CNST2         145.0000000
D0            0.00000300 sec
D1            1.46497905 sec
D4            0.00172414 sec
D11           0.03000000 sec
D16           0.00020000 sec
D24           0.00086207 sec
IN0           0.00002080 sec
ZGPTNS
  
```

```

===== CHANNEL f1 =====
SF01          400.1320007 MHz
NUC1           1H
P1             11.50 usec
P2             23.00 usec
P28            0.00 usec
ND0            2
TD             256
SF01          100.6233 MHz
FIDRES         93.900238 Hz
SW             238.896 ppm
FnMODE         Echo-Antiecho
SI            1024
SF            400.1300061 MHz
WDW            QSINE
SSB            2
LB             0.00 Hz
GB             0
PC             1.40
SI            1024
MC2            echo-antiecho
SF            100.6127554 MHz
WDW            QSINE
SSB            2
LB             0.00 Hz
  
```

HSQC (400 MHz) spectrum of compound **7** in CDCl<sub>3</sub>

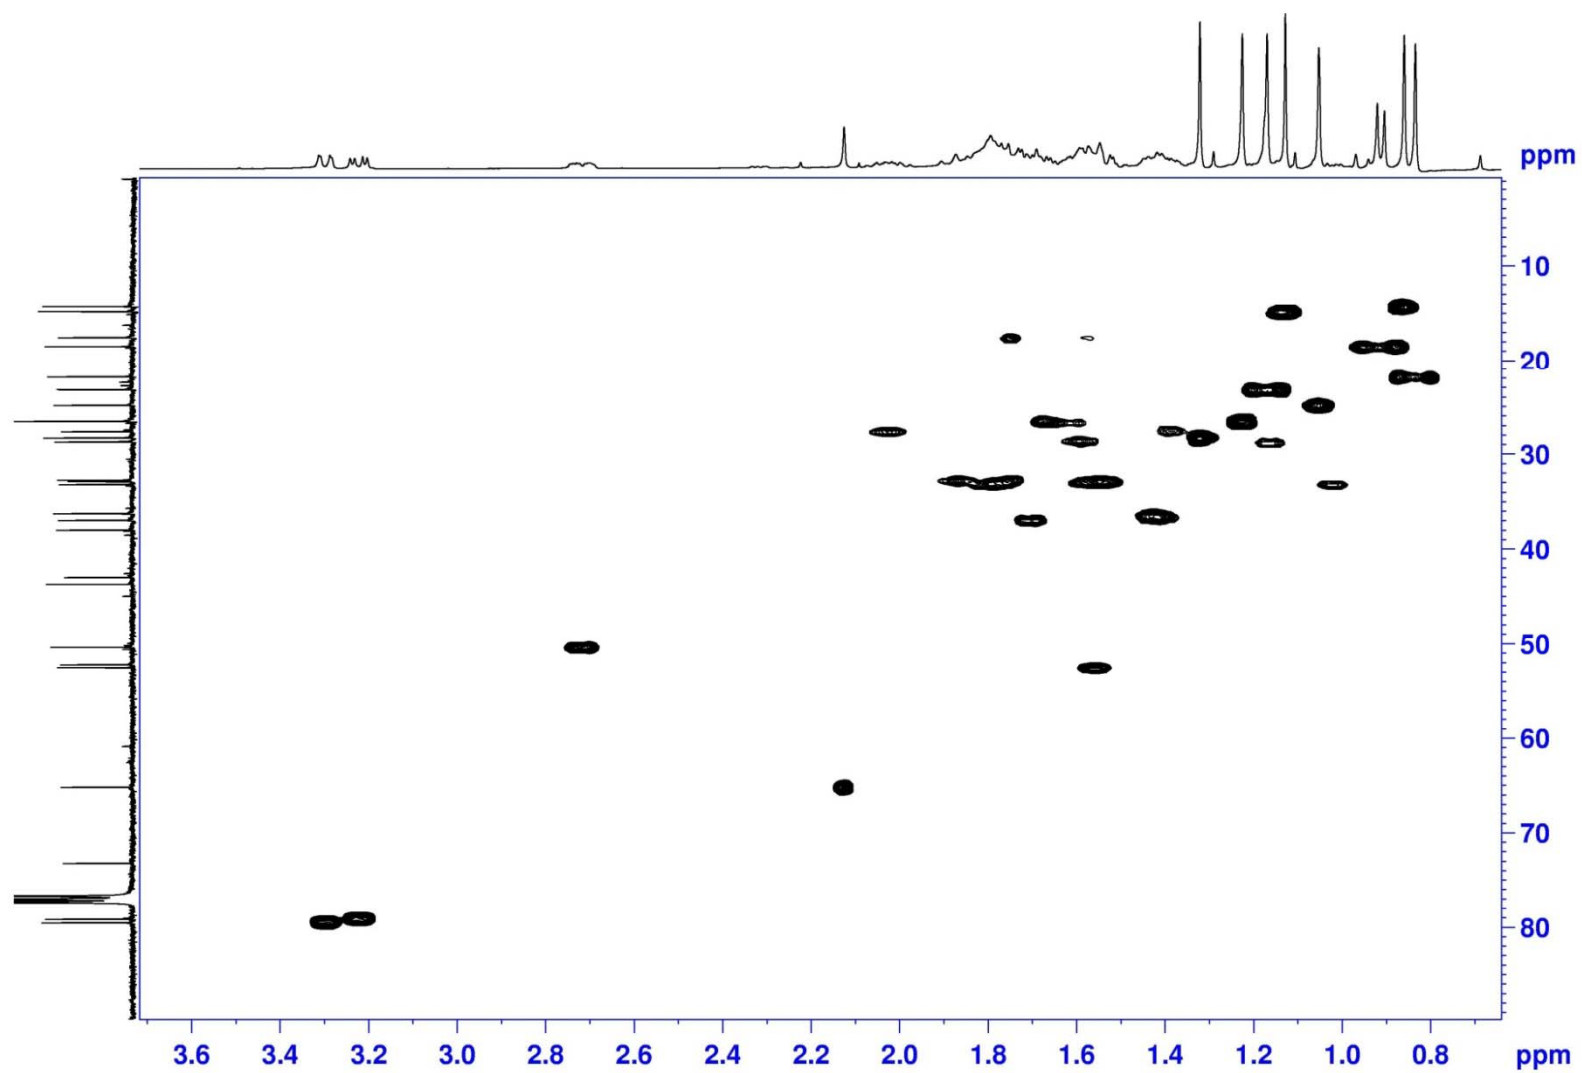

HSQC (400 MHz) spectrum of compound **7** in CDCl<sub>3</sub>

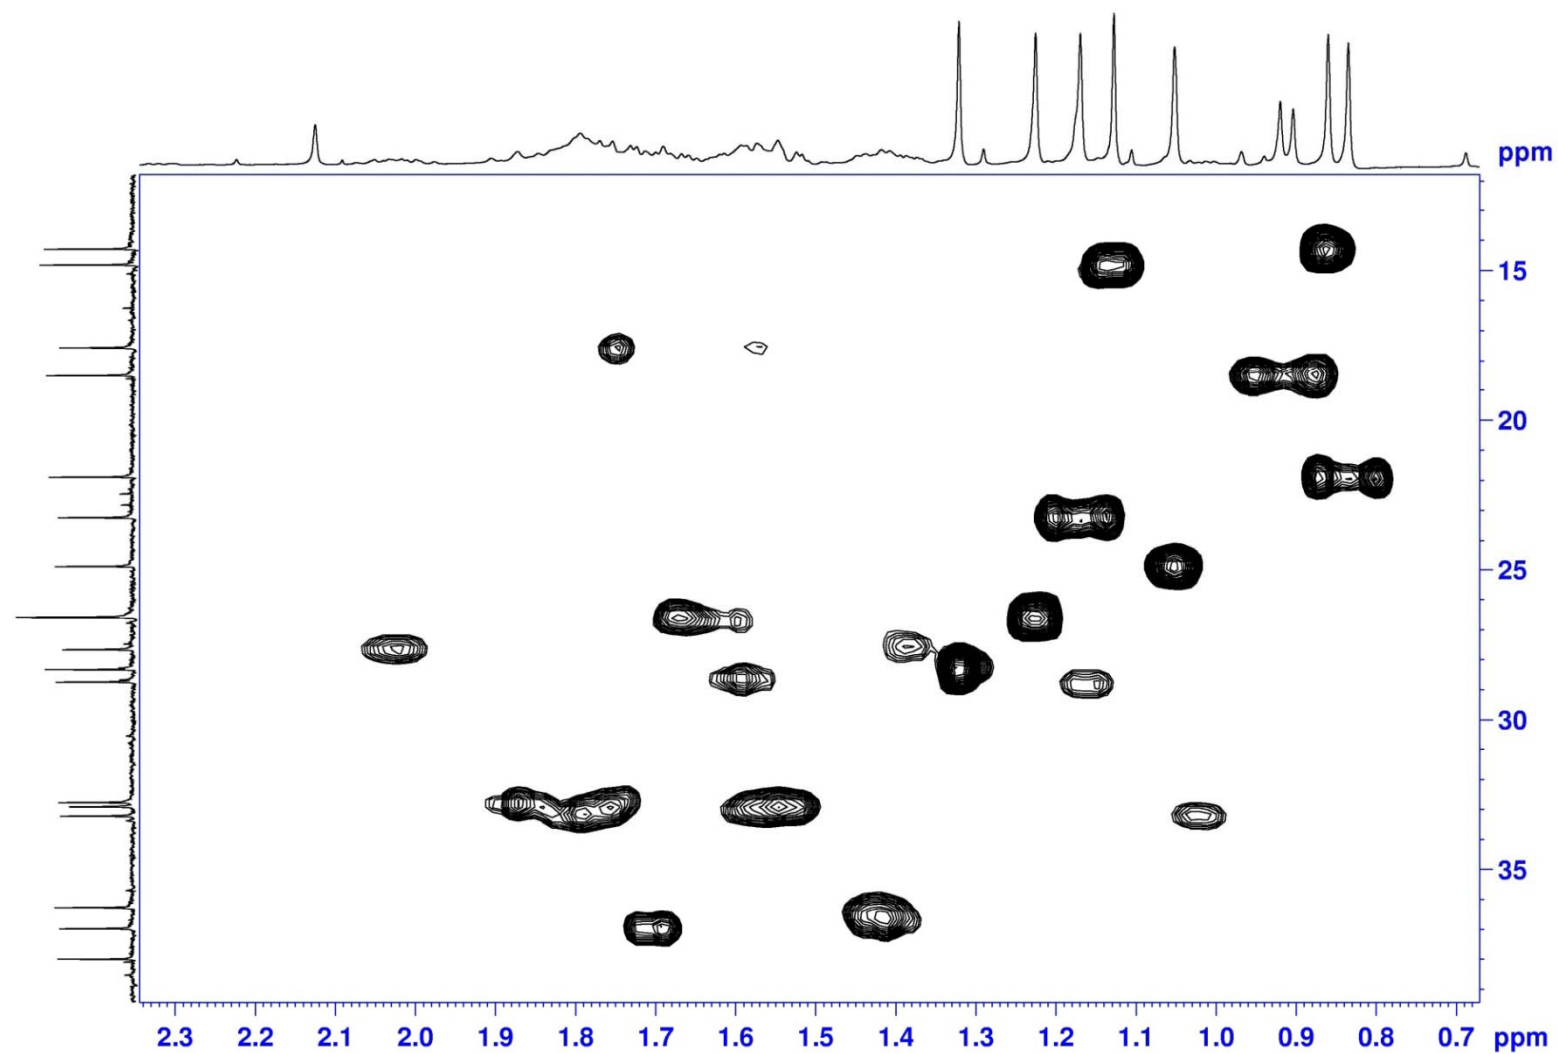

# HMBC (400 MHz) spectrum of compound **7** in CDCl<sub>3</sub>

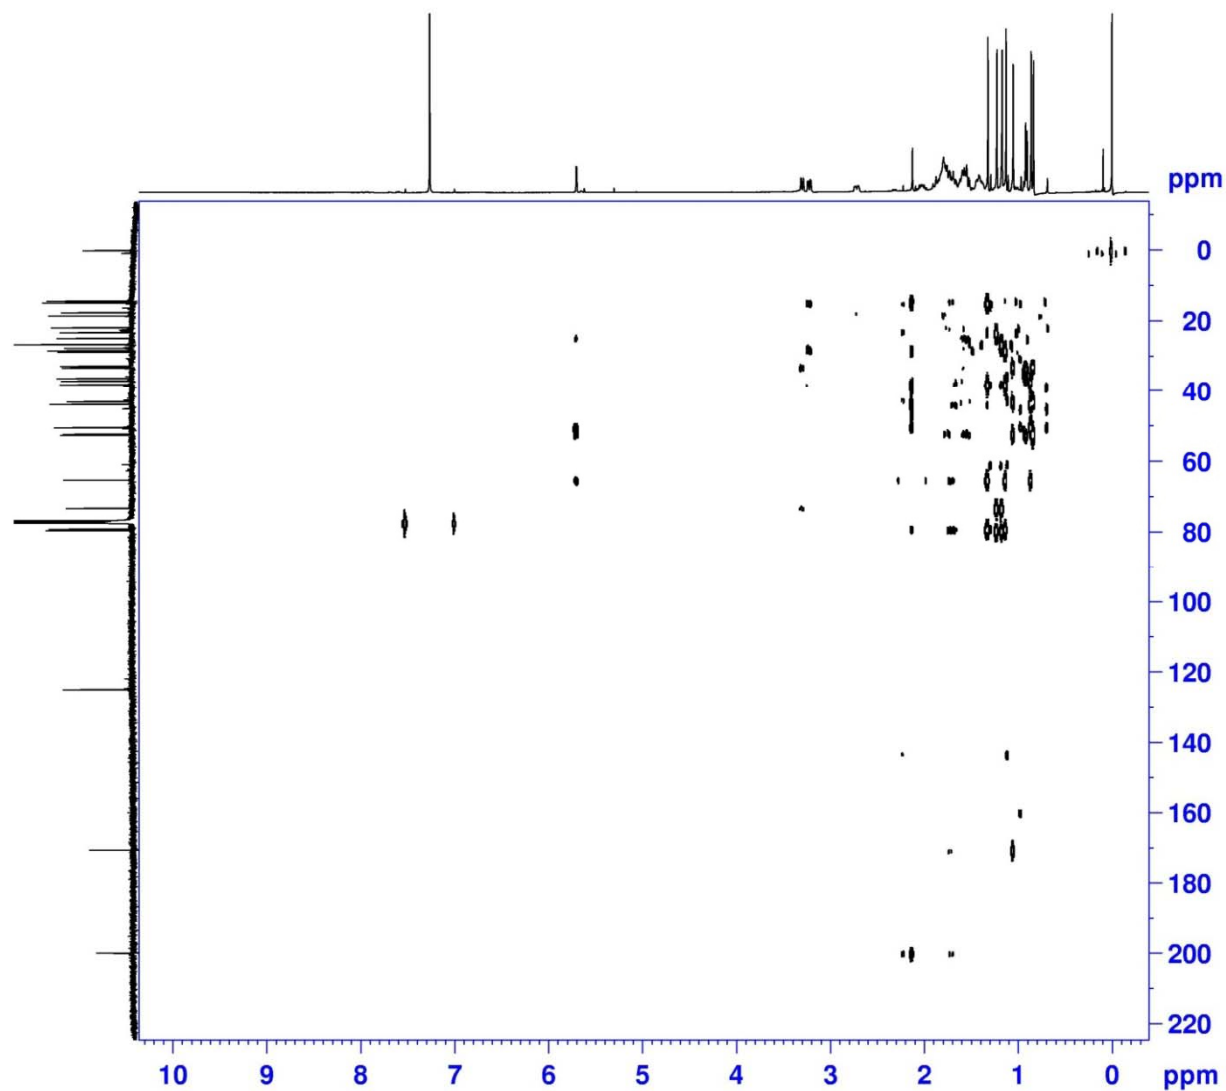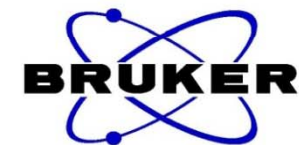

```

NAME          EA-17
EXPNO         106
PROCNO        1
Date_         20160806
Time          0.41
INSTRUM       spect
PROBHD        5 mm CPPBBO BB
PULPROG       hmbcggplpndqf
TD            4096
SOLVENT       CDCl3
NS            32
DS            16
SWH           5197.505 Hz
FIDRES        1.268922 Hz
AQ            0.3940852 sec
RG            208.5
DW            96.200 usec
DE            10.00 usec
TE            297.0 K
CNST2         145.0000000
CNST13        10.0000000
D0            0.00000300 sec
D1            1.50000000 sec
D2            0.00344828 sec
D6            0.05000000 sec
D16           0.00020000 sec
IN0           0.00002080 sec

===== CHANNEL f1 =====
SFO1          400.1323208 MHz
NUC1           1H
P1            11.50 usec
P2            23.00 usec
ND0            2
TD            128
SFO1          100.6233 MHz
FIDRES        187.800476 Hz
SW            238.896 ppm
FnMODE        QF
SI            2048
SF            400.1300075 MHz
WDW           SINE
SSB            0
LB            0.00 Hz
GB            0
PC            1.40
SI            1024
MC2           QF
SF            100.6127394 MHz
WDW           SINE
SSB            0
LB            0.00 Hz
    
```

HMBC (400 MHz) spectrum of compound **7** in  $\text{CDCl}_3$

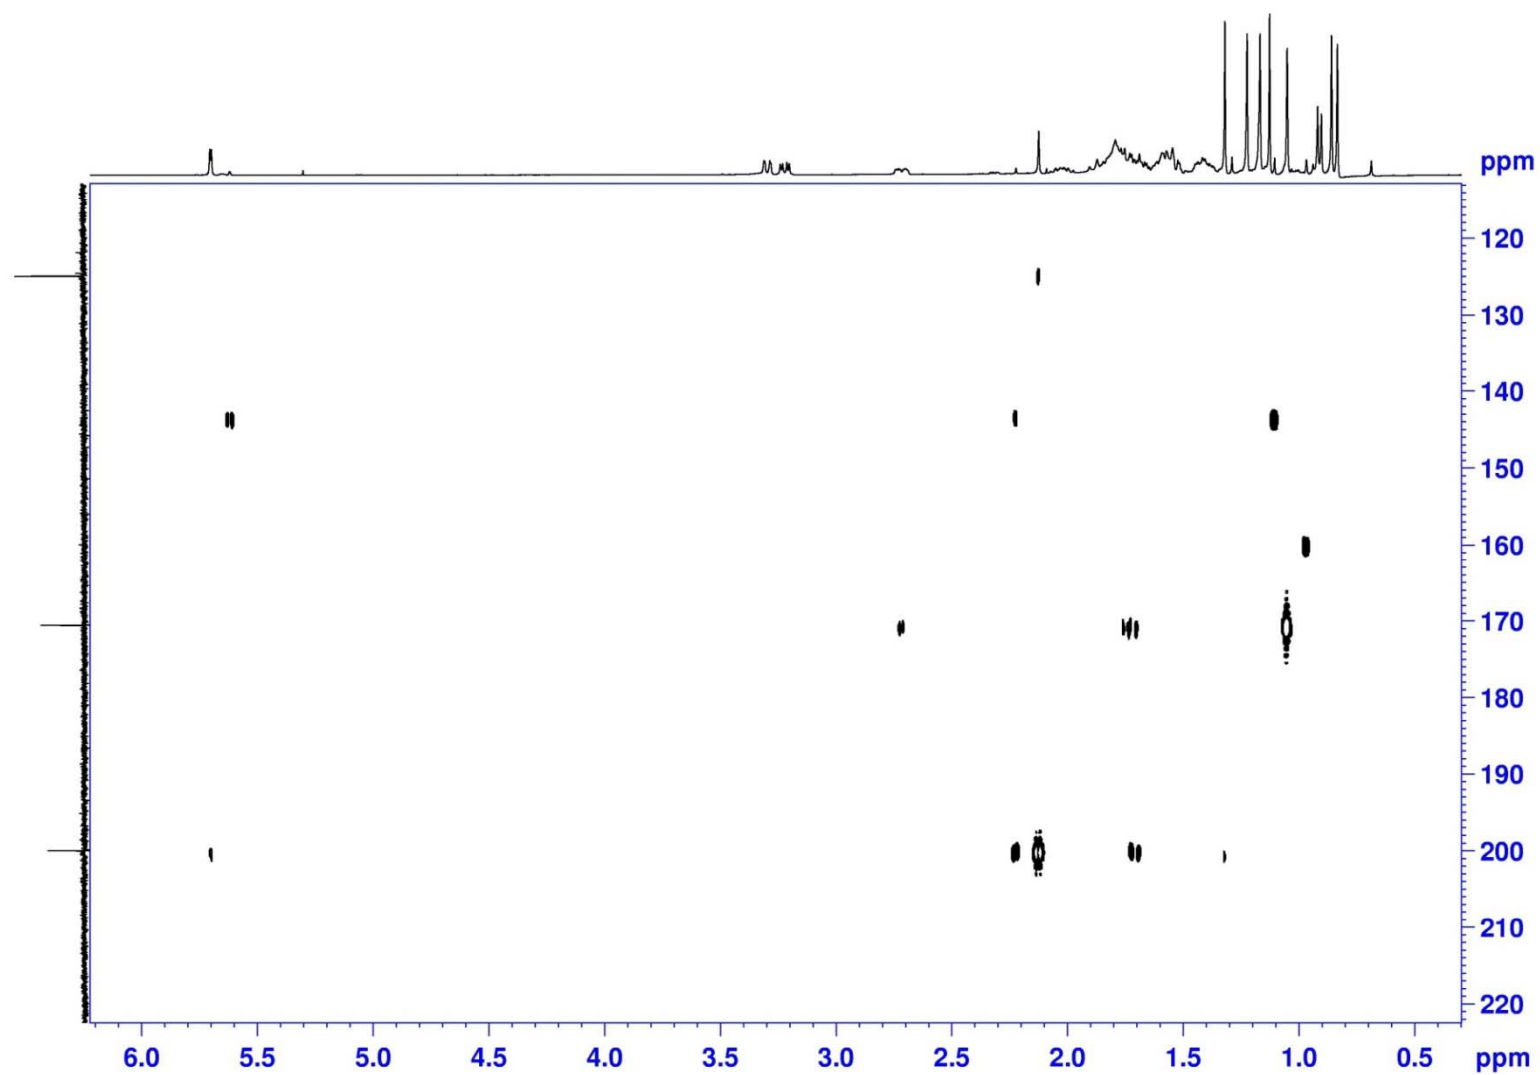

HMBC (400 MHz) spectrum of compound **7** in CDCl<sub>3</sub>

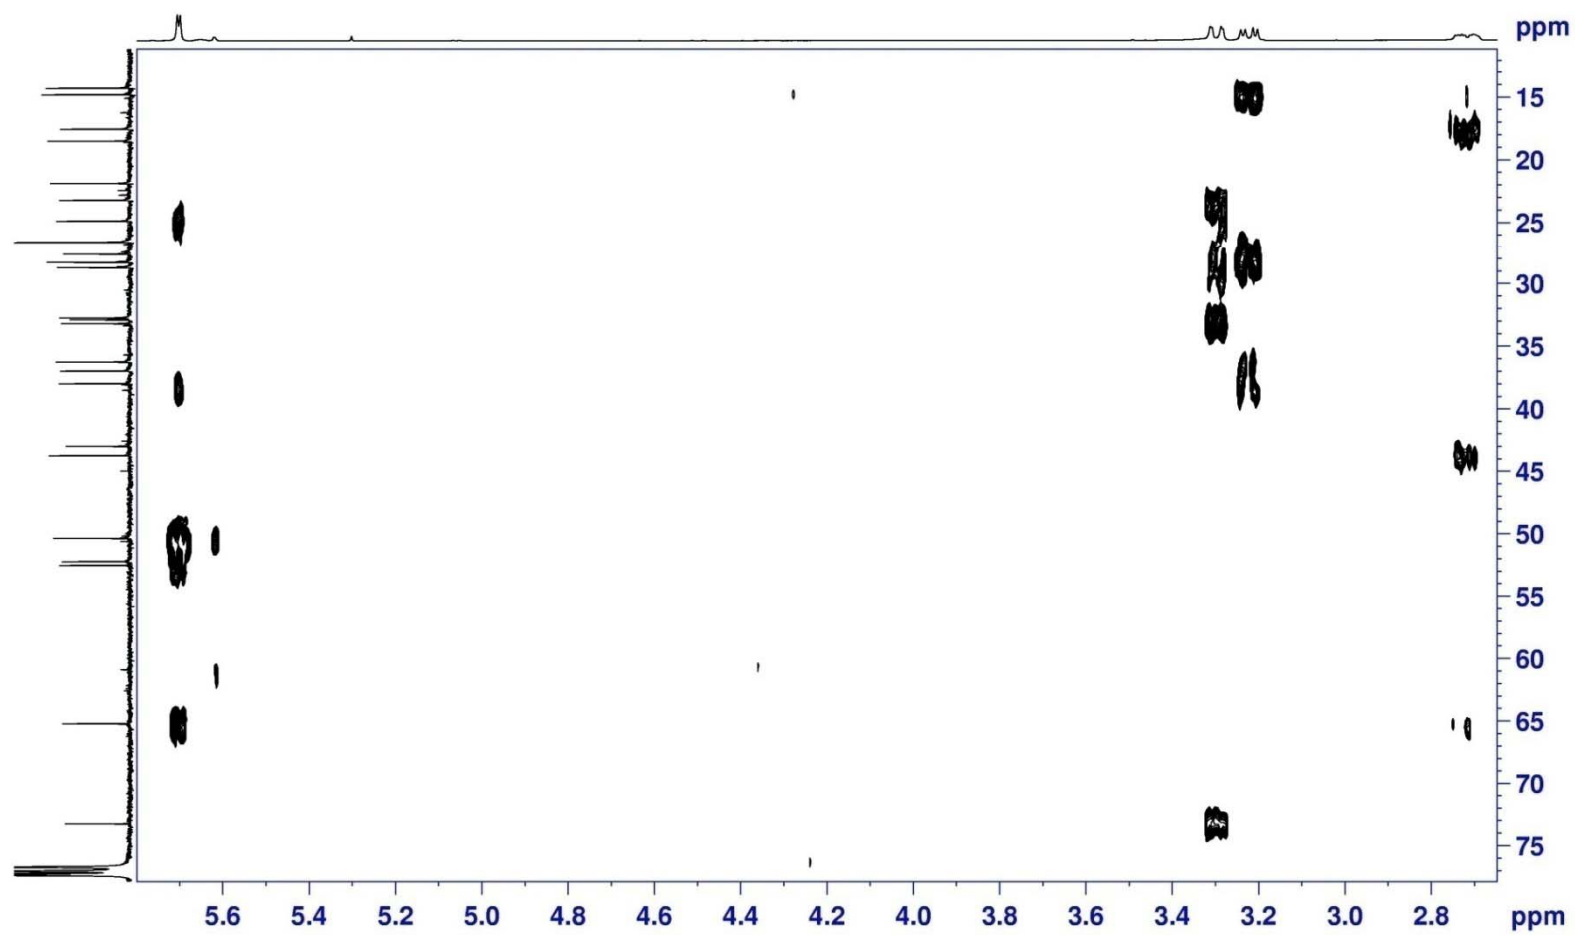



HMBC (400 MHz) spectrum of compound **7** in CDCl<sub>3</sub>

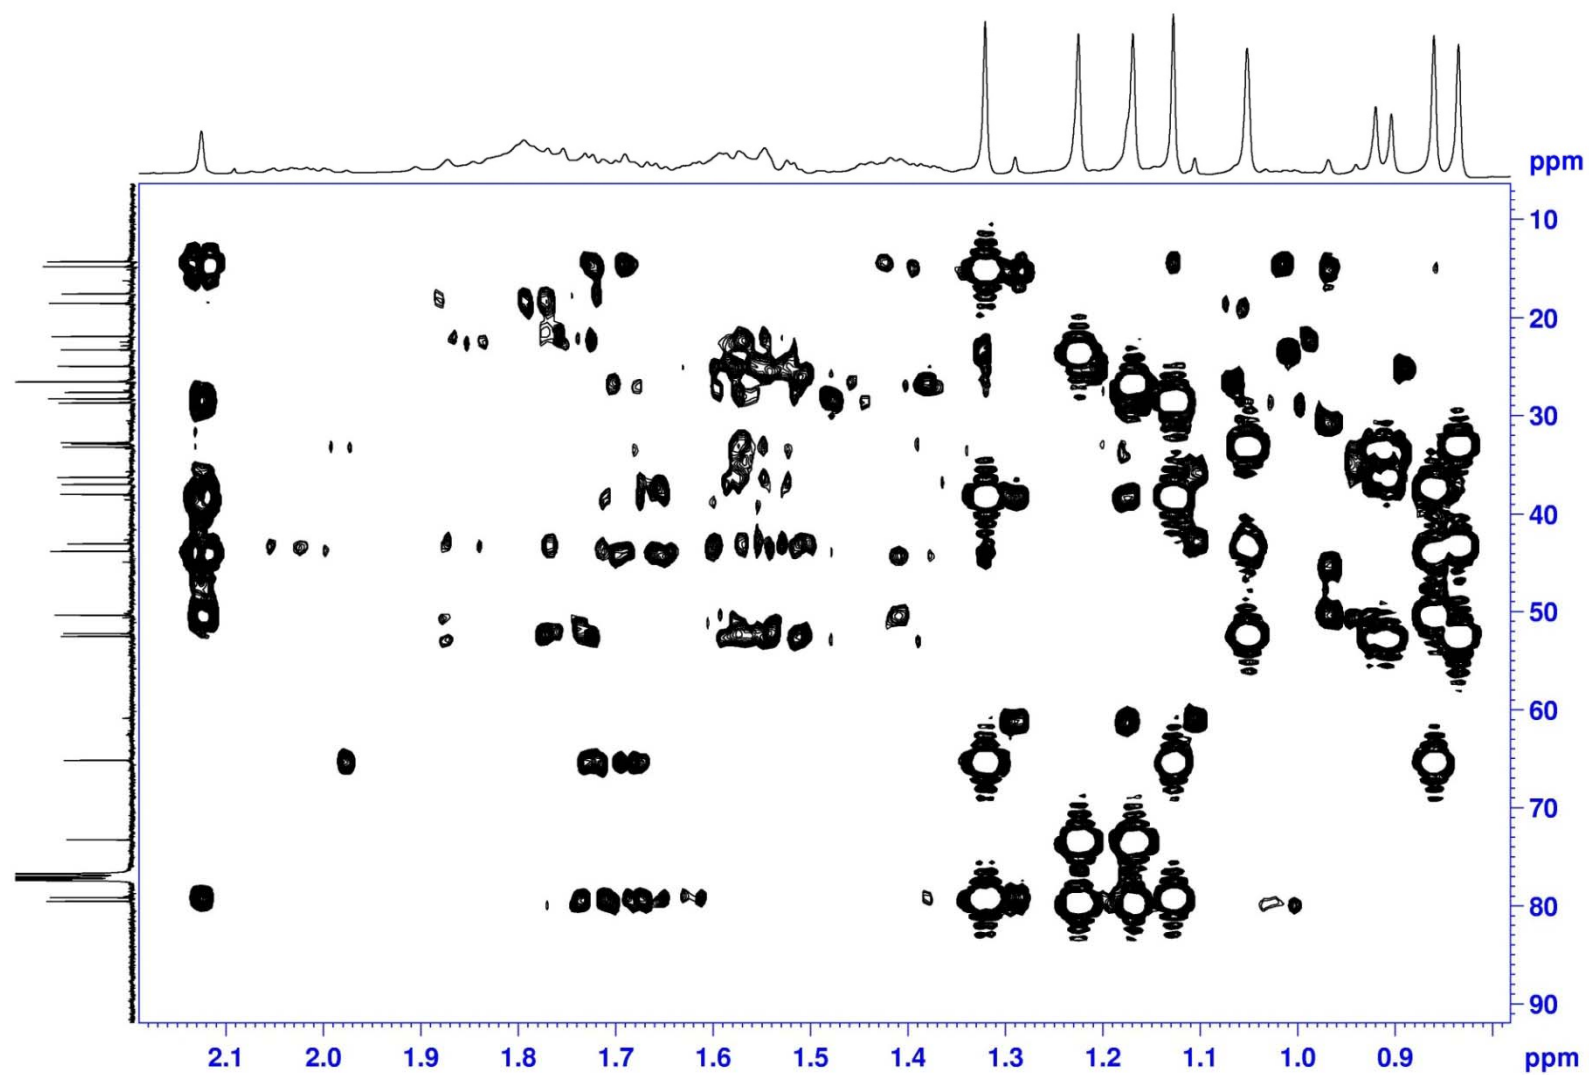

HMBC (400 MHz) spectrum of compound **7** in  $\text{CDCl}_3$

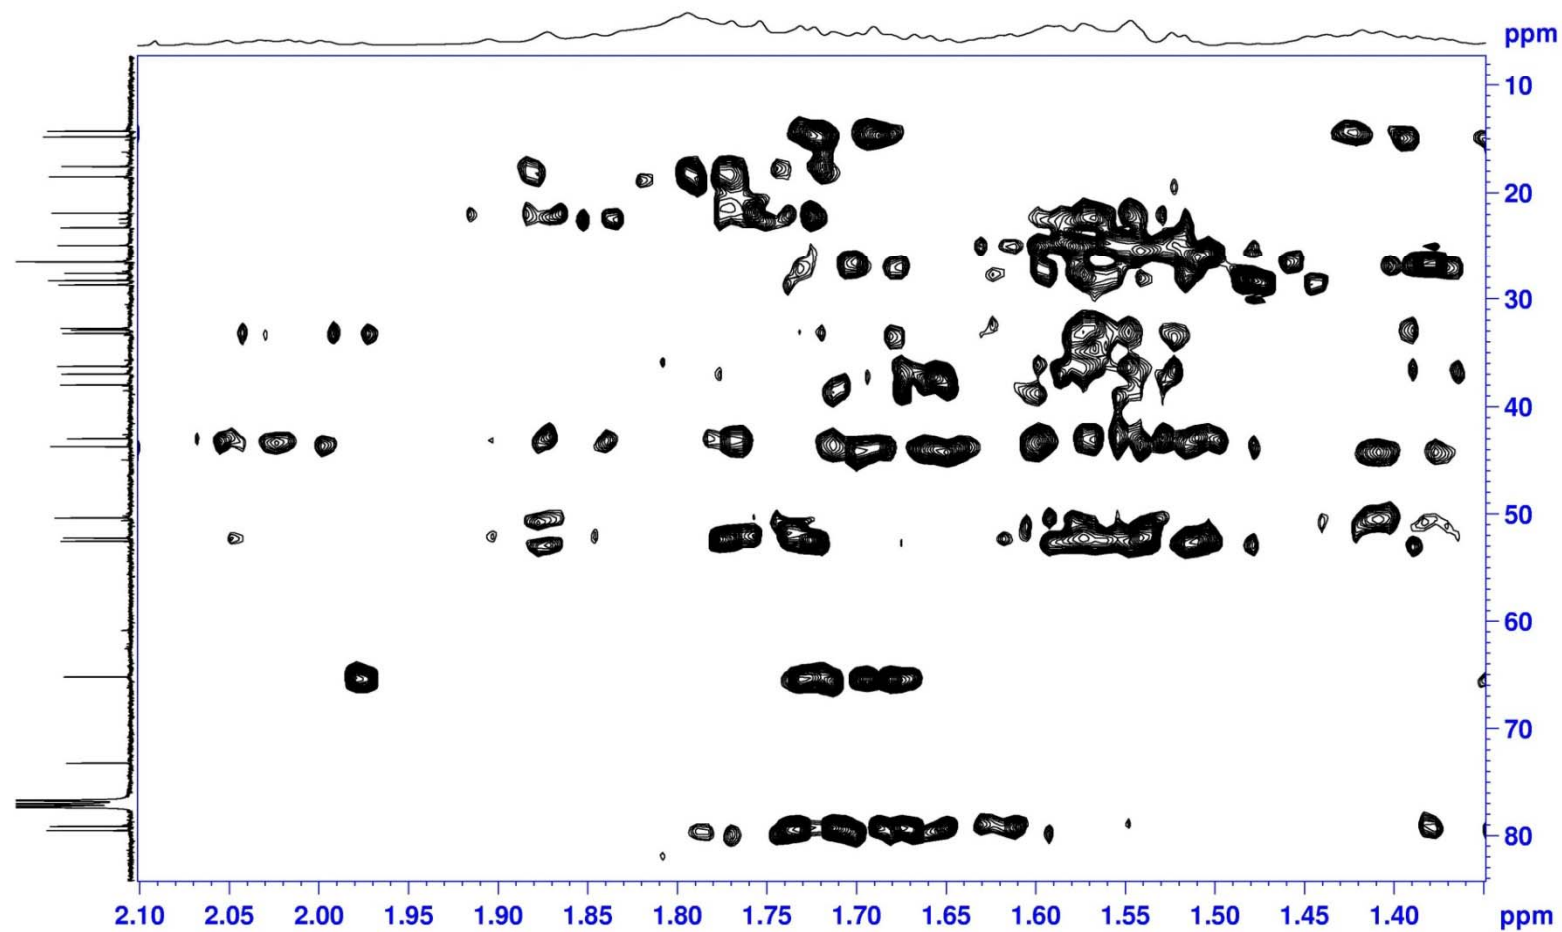

HMBC (400 MHz) spectrum of compound **7** in CDCl<sub>3</sub>

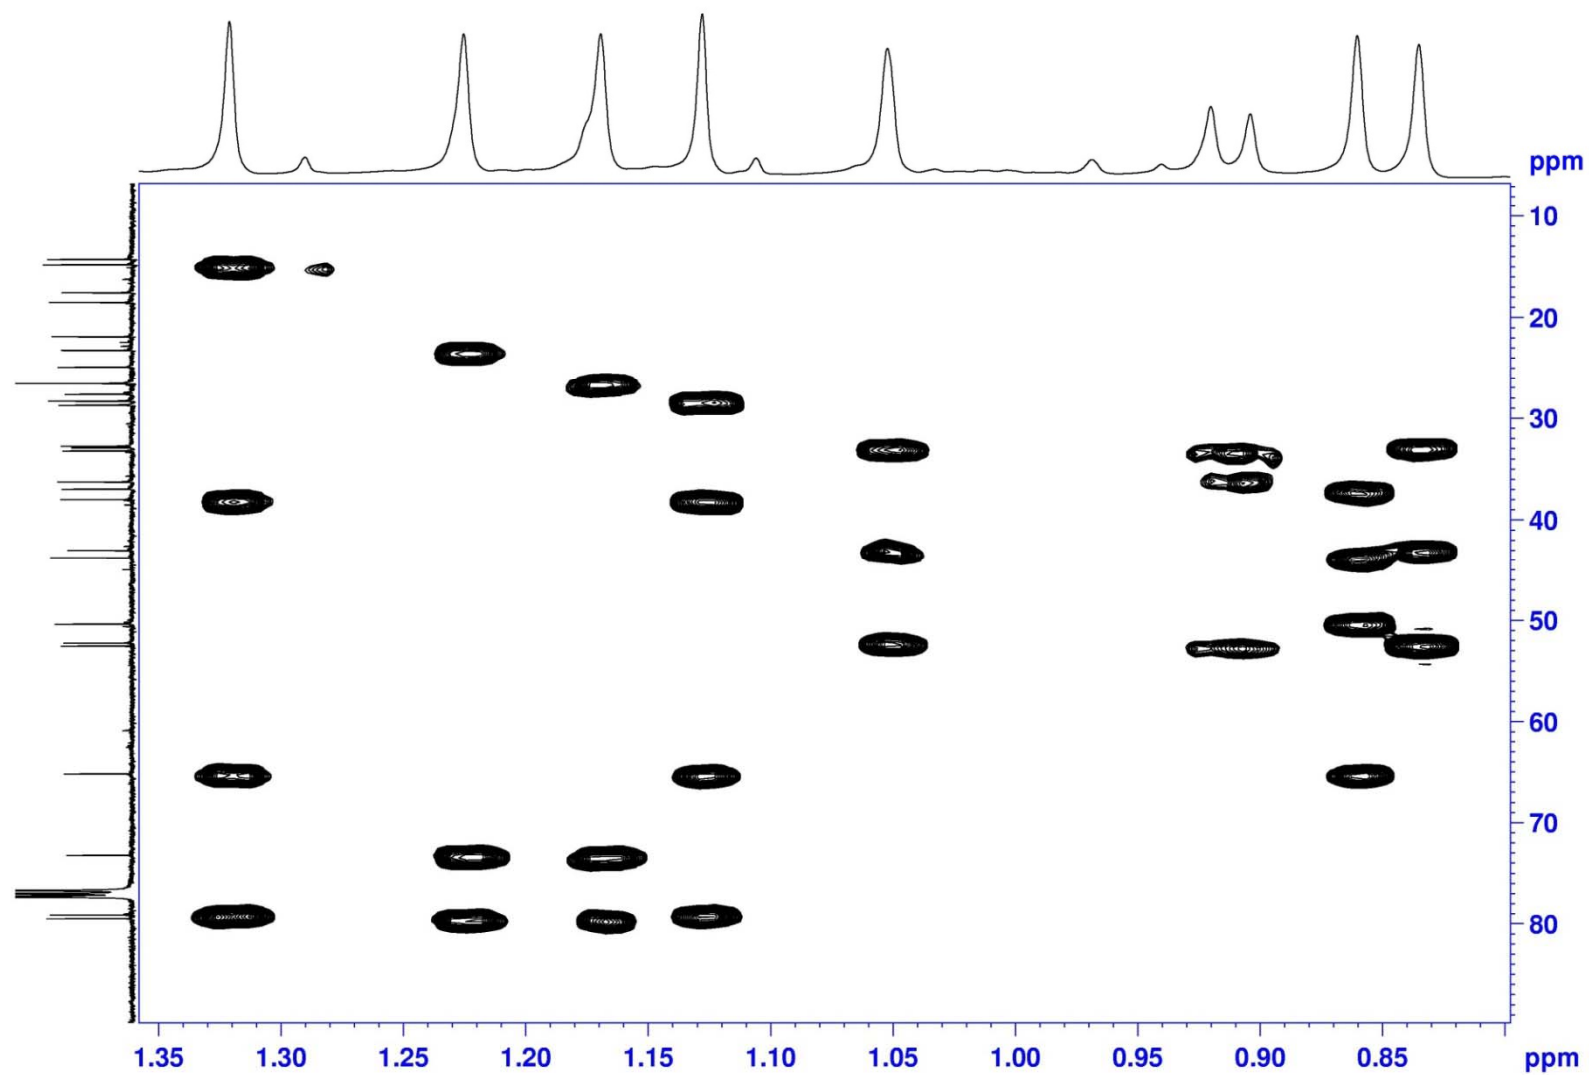

# NOESY (400 MHz) spectrum of compound **7** in CDCl<sub>3</sub>

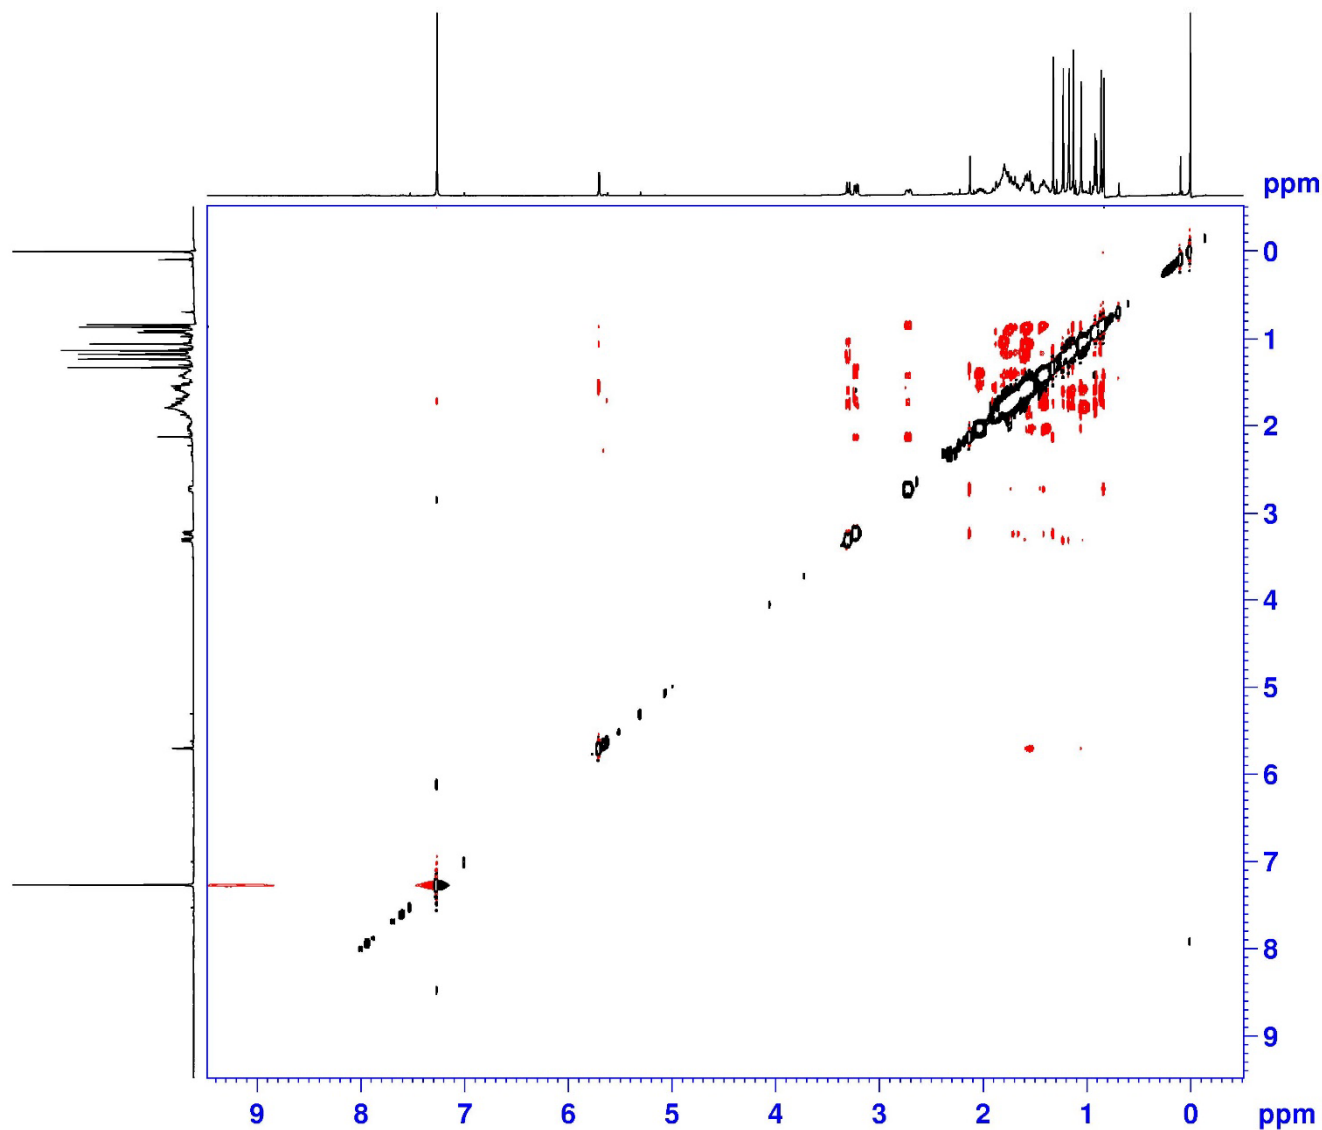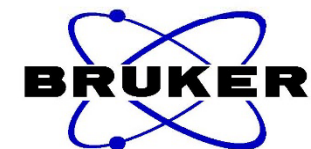

```

NAME          EA 17
EXPNO          107
PROCNO         1
Date_          20160806
Time           2.56
INSTRUM        spect
PROBHD         5 mm CFPBBO BB
PULPROG        noesygpphpp
TD             2048
SOLVENT        CDCl3
NS             16
DS             32
SWH            4000.000 Hz
FIDRES         1.953125 Hz
AQ             0.2560500 sec
RG             208.5
DW             125.000 usec
DE             10.00 usec
TE             297.0 K
D0             0.00011036 sec
D1             1.99385595 sec
D8             0.30000001 sec
D11            0.03000000 sec
D12            0.00002000 sec
D16            0.00020000 sec
IN0            0.00025000 sec
  
```

```

===== CHANNEL f1 =====
SFO1          400.1318006 MHz
NUC1           1H
P1             11.50 usec
P2             23.00 usec
P17            2500.00 usec
ND0            1
TD             256
SFO1          400.1318 MHz
FIDRES         15.625000 Hz
SW             9.997 ppm
FnMODE         States-TPPI
SI             1024
SF            400.1300055 MHz
WDW            QSINE
SSB            2
LB             0.00 Hz
GB             0
PC             1.00
SI             1024
MC2            States-TPPI
SF            400.1300064 MHz
WDW            QSINE
SSB            ?
  
```

**S190**

NOESY (400 MHz) spectrum of compound **7** in  $\text{CDCl}_3$

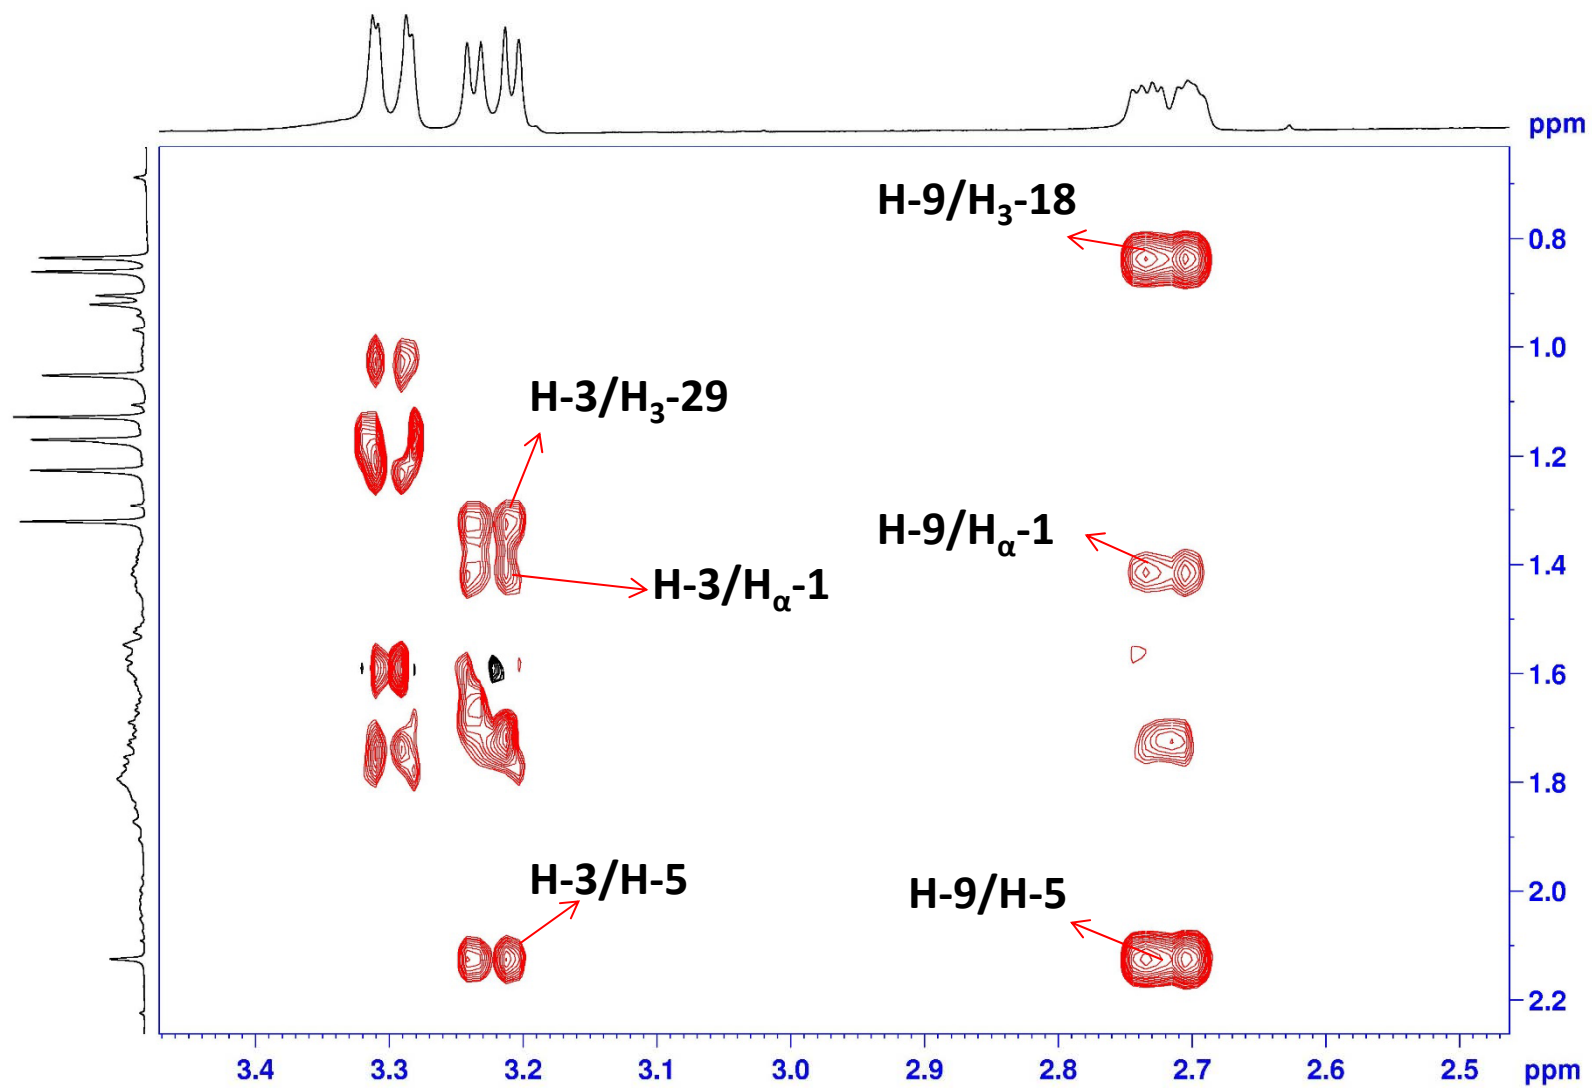

NOESY (400 MHz) spectrum of compound **7** in  $\text{CDCl}_3$

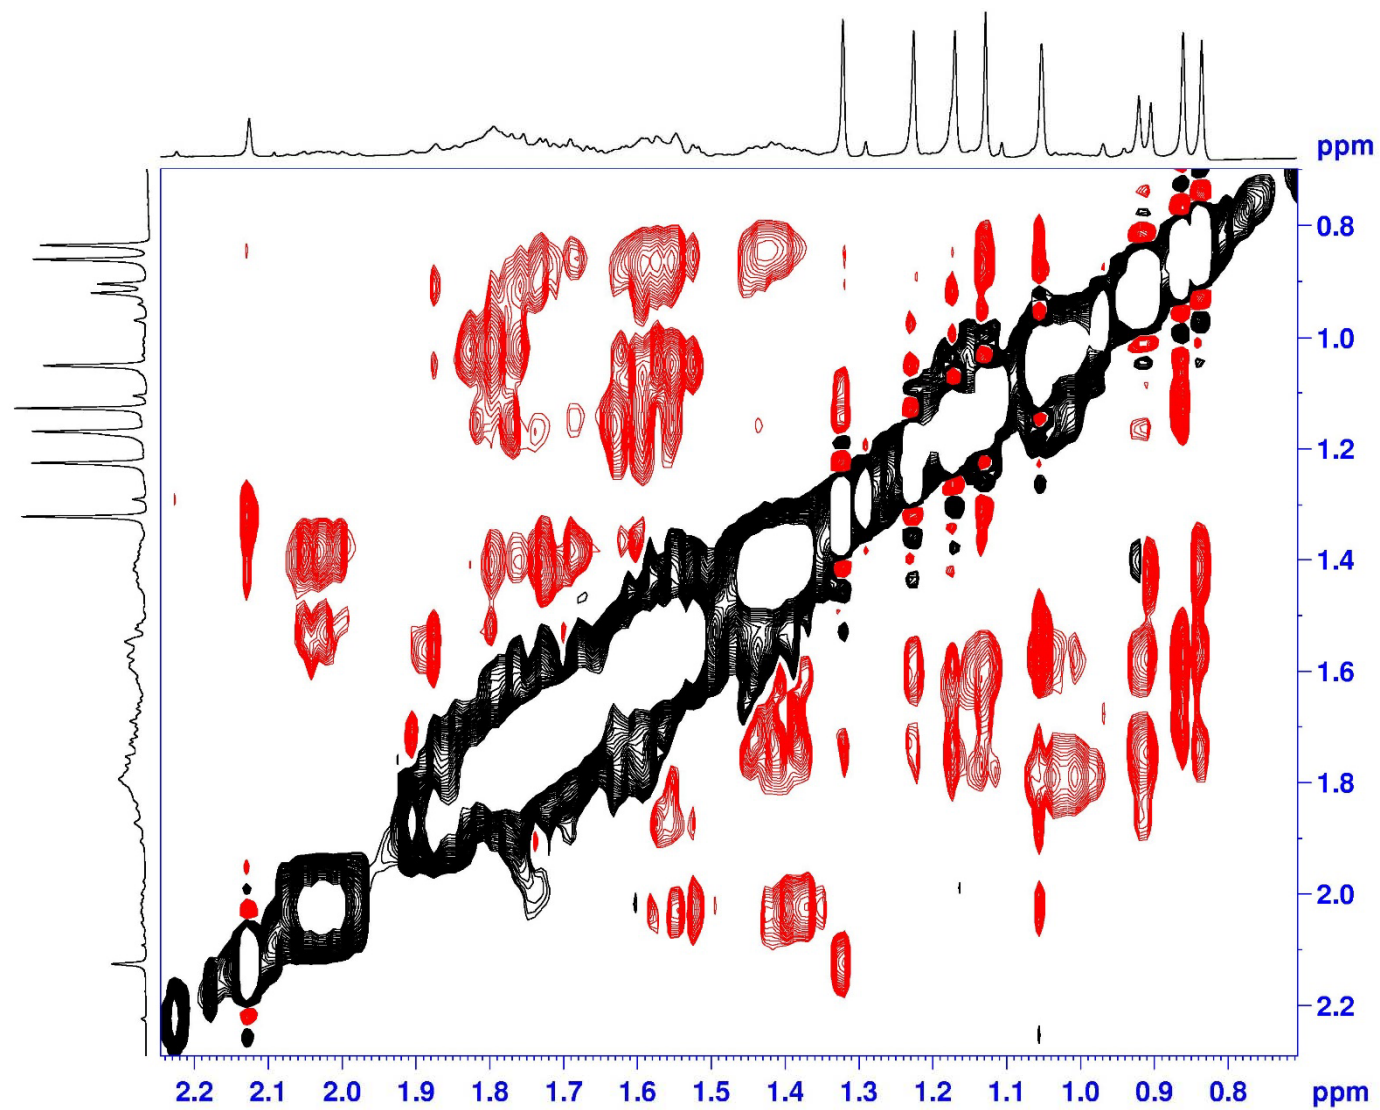

NOESY (400 MHz) spectrum of compound **7** in CDCl<sub>3</sub>

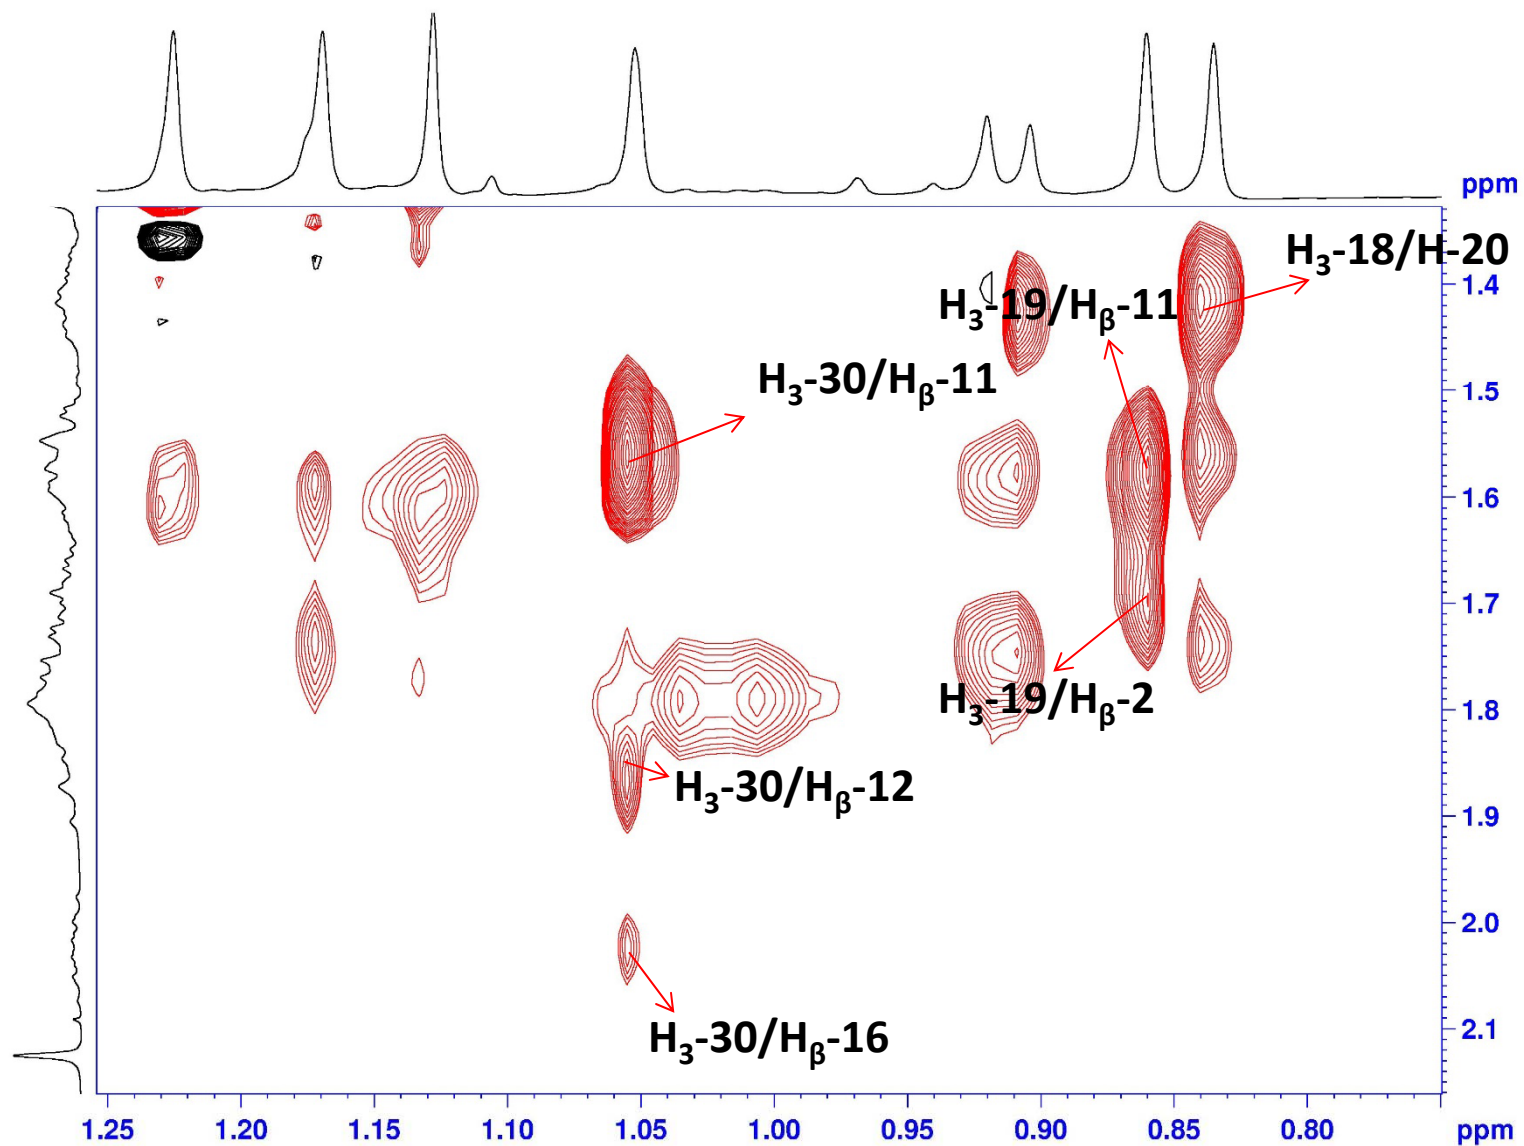



# HR-ESIMS for compound 8

## Elemental Composition Report

Page 1

### Single Mass Analysis

Tolerance = 5.0 PPM / DBE: min = -1.5, max = 50.0

Element prediction: Off

Number of isotope peaks used for i-FIT = 3

Monoisotopic Mass, Even Electron Ions

360 formula(e) evaluated with 2 results within limits (up to 50 closest results for each mass)

Elements Used:

C: 0-50 H: 0-100 N: 0-1 O: 0-20 Na: 0-1

EA3-44-3-1

201807308 258 (2.075)

$[M+H]^+$

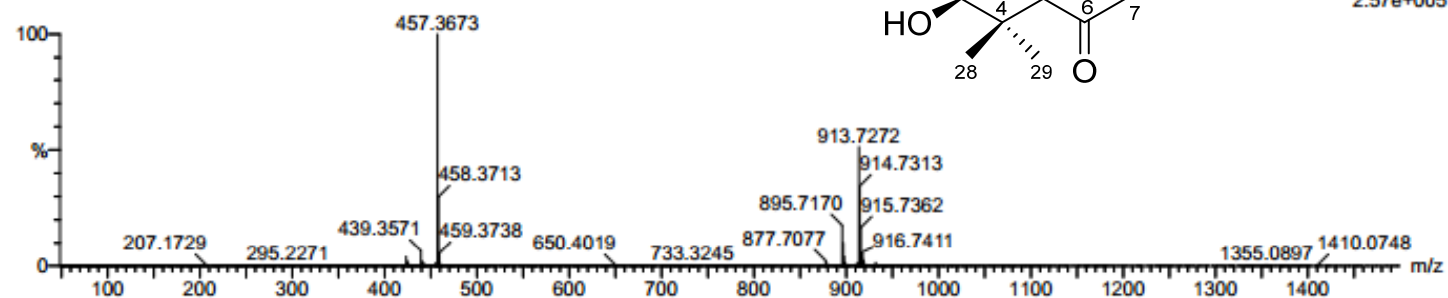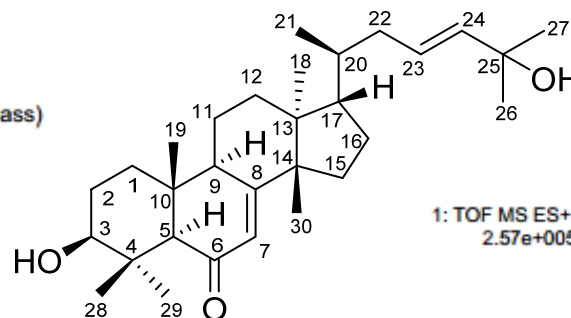

Minimum: -1.5  
Maximum: 5.0 5.0 50.0

| Mass     | Calc. Mass | mDa  | PPM  | DBE | i-FIT | Norm  | Conf (%) | Formula       |
|----------|------------|------|------|-----|-------|-------|----------|---------------|
| 457.3673 | 457.3682   | -0.9 | -2.0 | 6.5 | 415.9 | 2.086 | 12.41    | C30 H49 O3    |
|          | 457.3658   | 1.5  | 3.3  | 3.5 | 414.0 | 0.133 | 87.59    | C28 H50 O3 Na |



$^1\text{H}$  NMR (400 MHz) spectrum of compound **8** in  $\text{CDCl}_3$

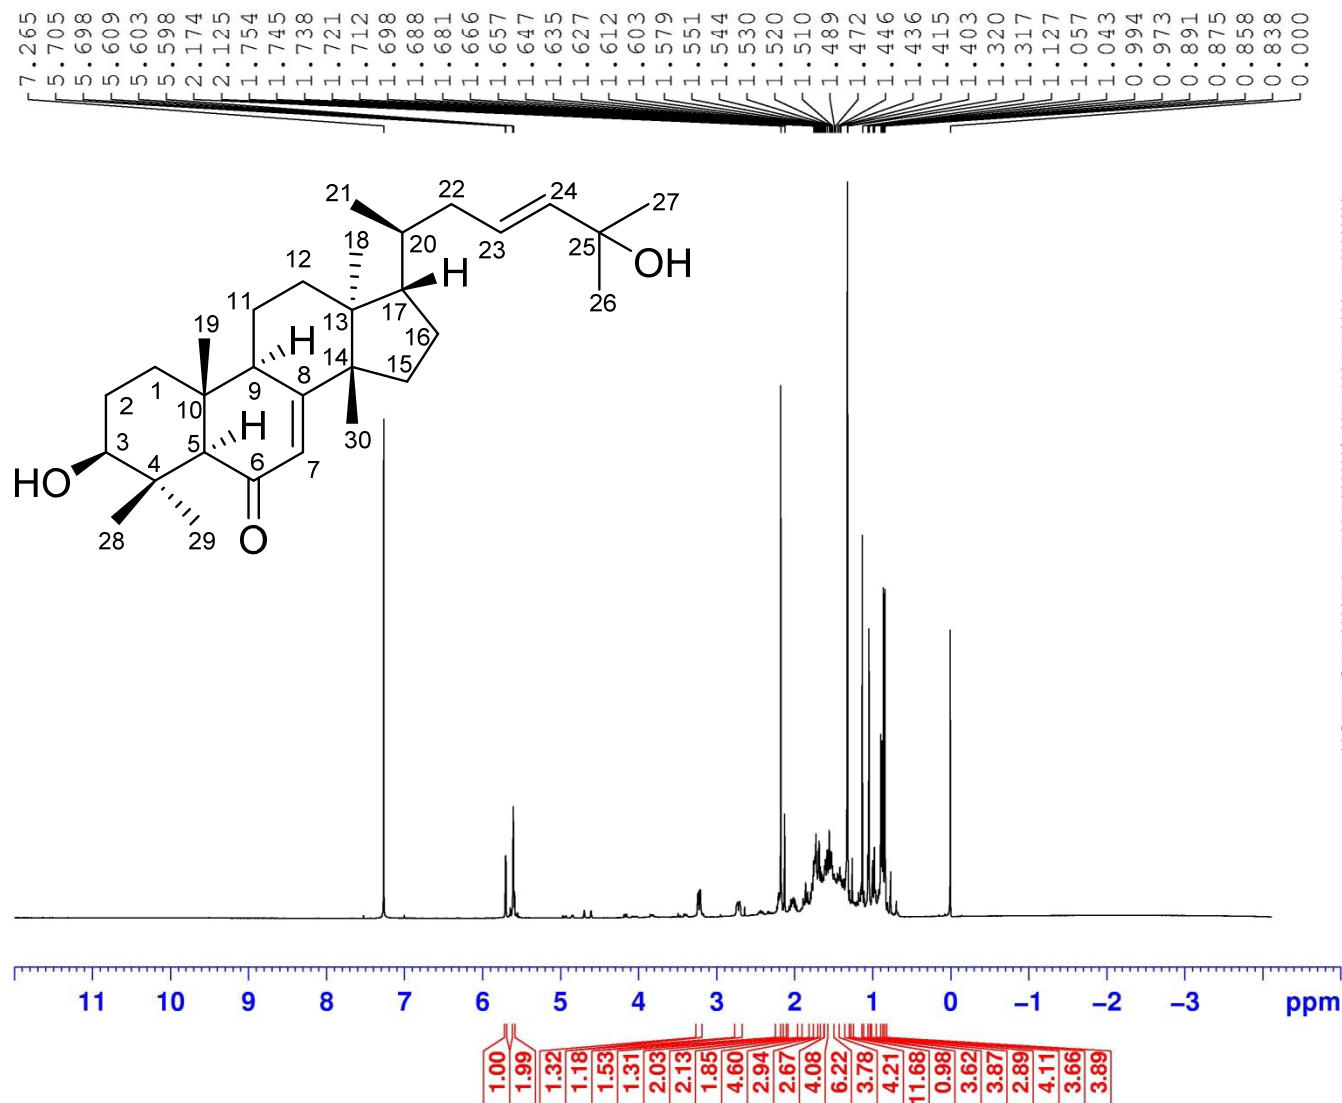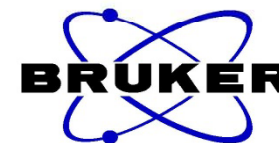

```

NAME      EA3-44-3-1
EXPNO     1
PROCNO    1
Date_     20171106
Time      22.27
INSTRUM   spect
PROBHD    5 mm CFPBBO BB
PULPROG   zg30
TD        65536
SOLVENT   CDCl3
NS        16
DS        2
SWH       8223.685 Hz
FIDRES    0.125483 Hz
AQ        3.9846387 sec
RG        147.94
DW        60.800 usec
DE        10.00 usec
TE        297.0 K
D1        1.00000000 sec
TD0       1
    
```

```

----- CHANNEL f1 -----
SFO1      400.1324710 MHz
NUC1      1H
P1        11.50 usec
SI        65536
SF        400.1300076 MHz
WDW       EM
SSB       0
LB        0.30 Hz
GB        0
PC        1.00
    
```

$^1\text{H}$  NMR (400 MHz) spectrum of compound **8** in  $\text{CDCl}_3$

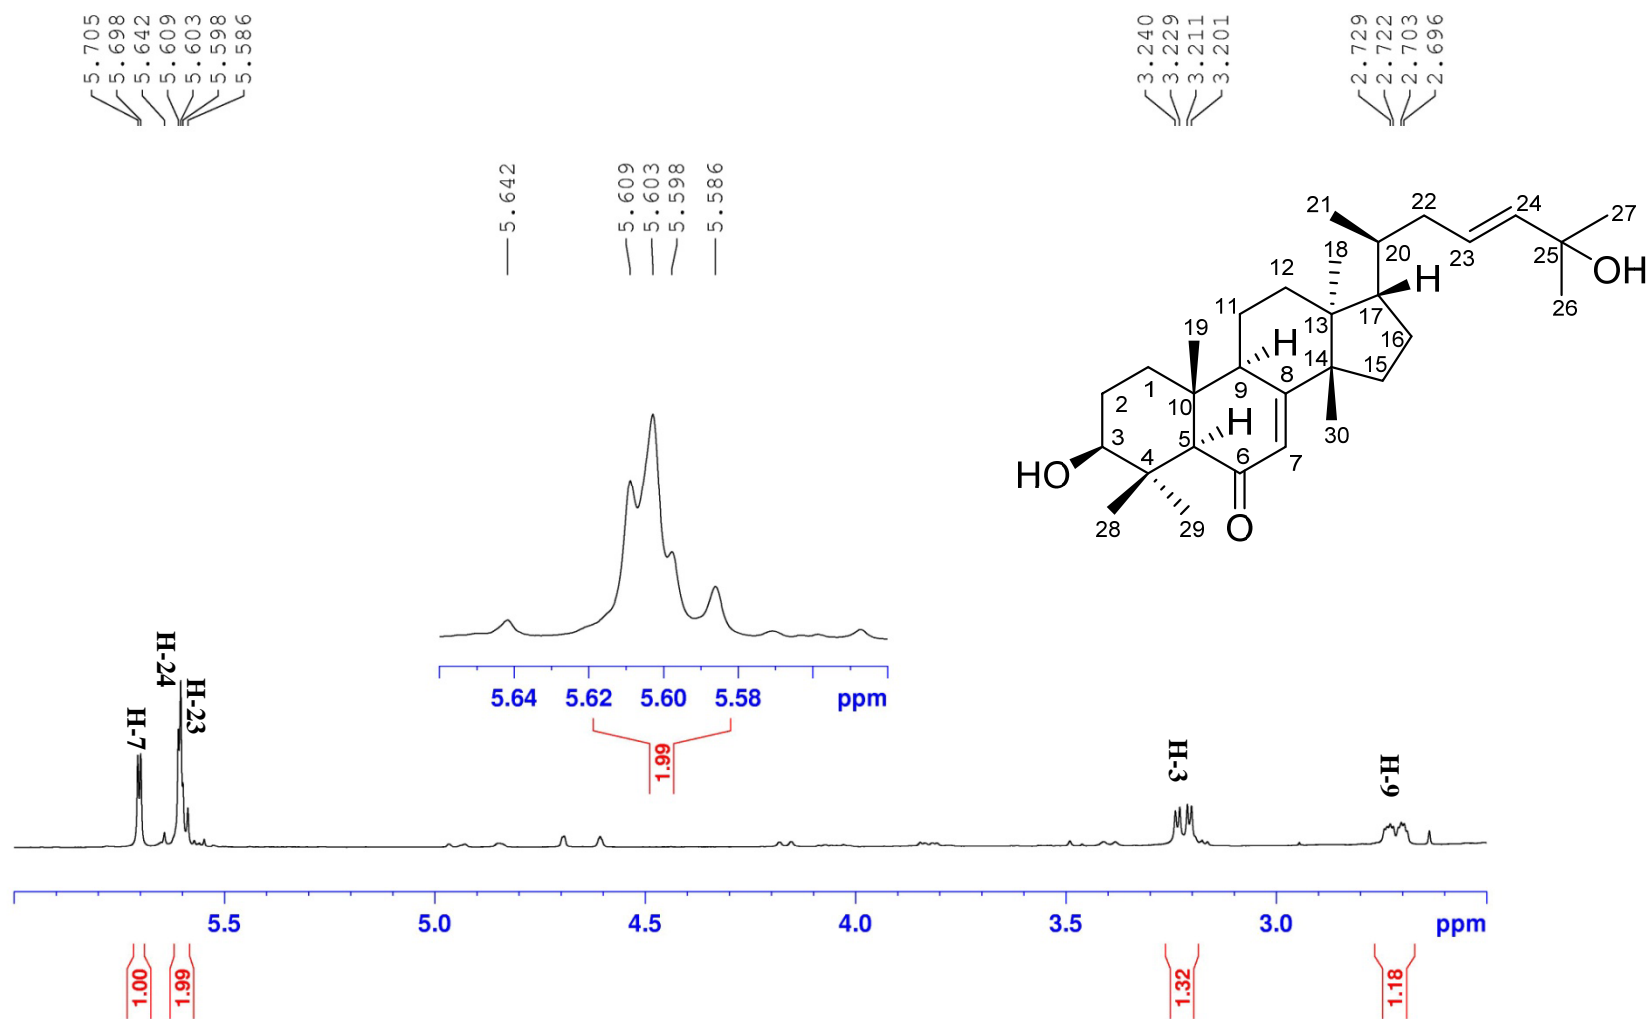

$^1\text{H}$  NMR (400 MHz) spectrum of compound **8** in  $\text{CDCl}_3$

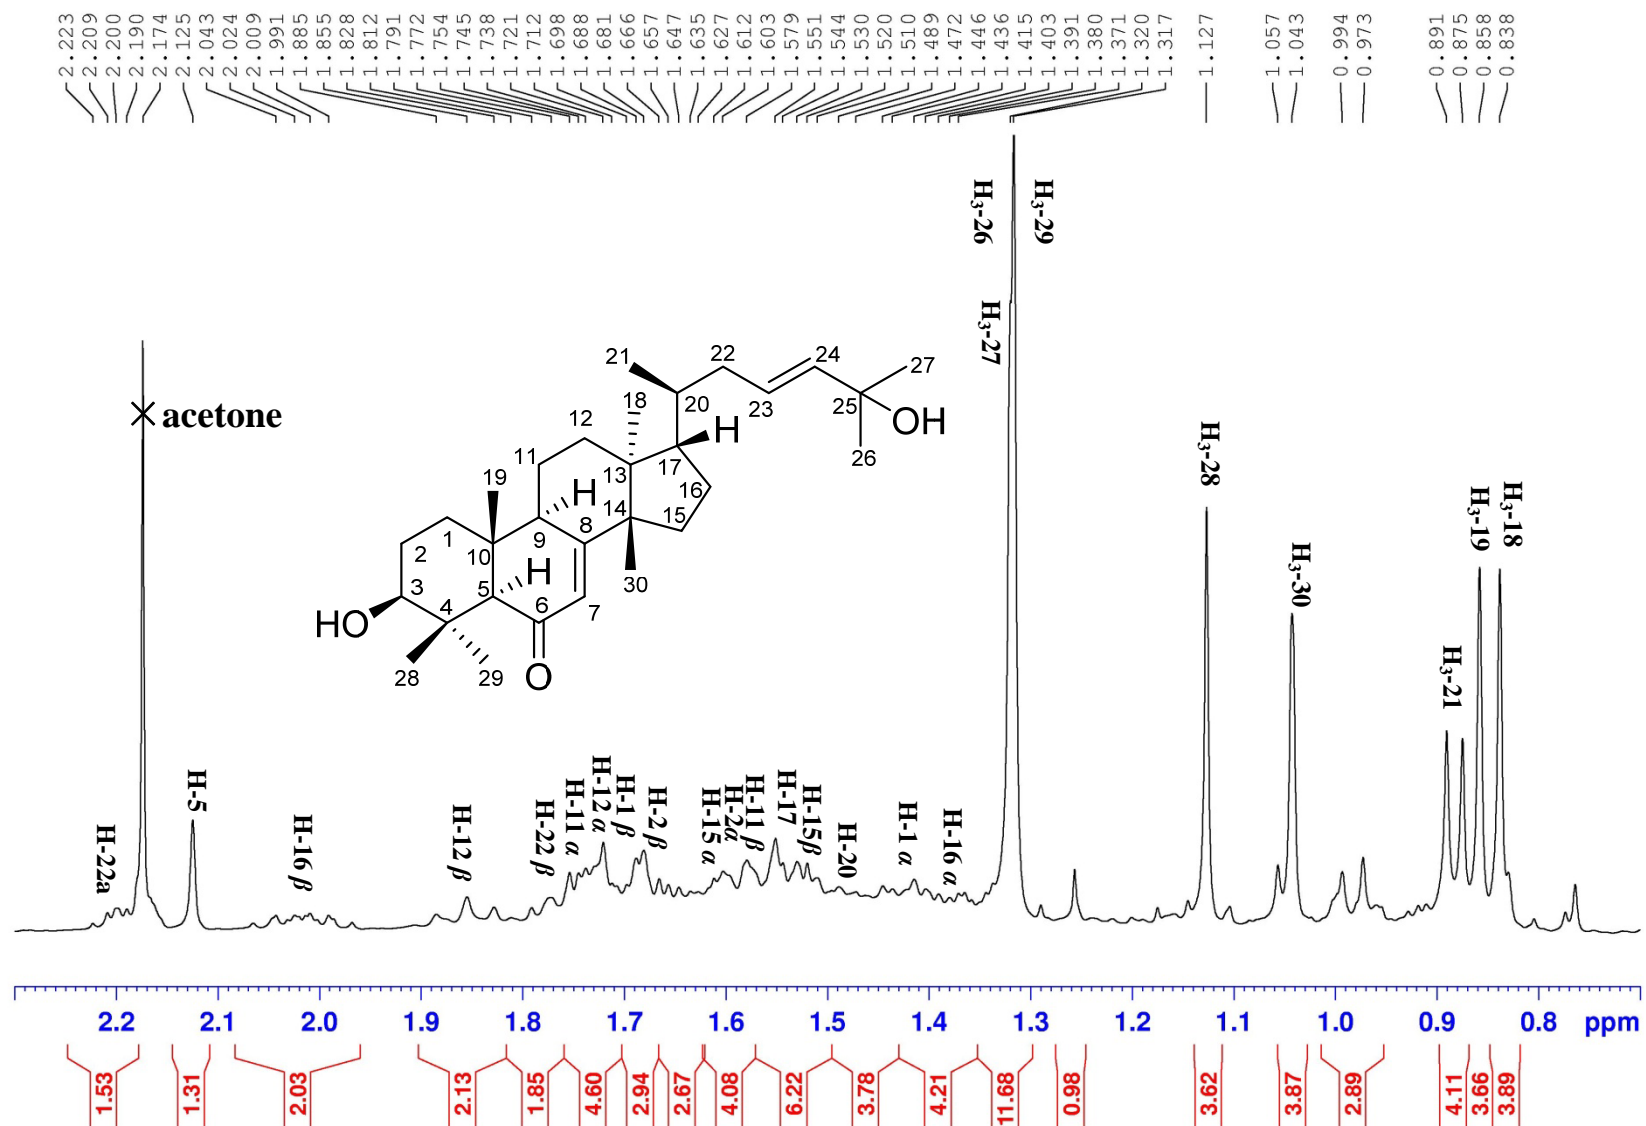

$^{13}\text{C}$  NMR (100 MHz) spectrum of compound **8** in  $\text{CDCl}_3$

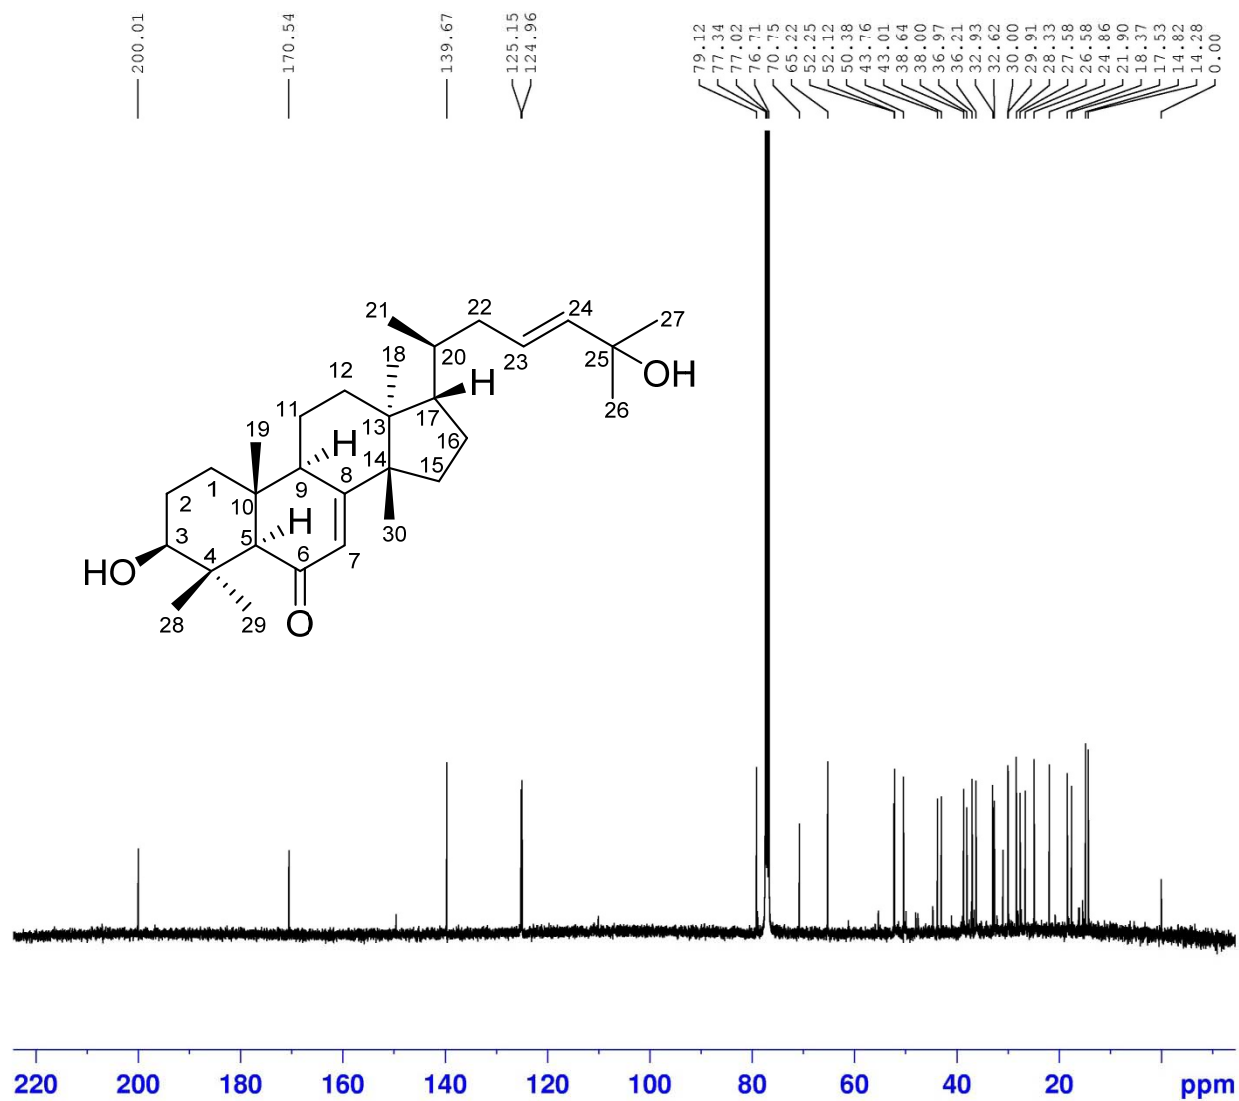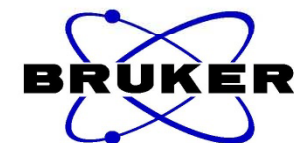

NAME EA3-44-3-1  
 EXPNO 2  
 PROCNO 1  
 Date\_ 20171107  
 Time 2.49  
 INSTRUM spect  
 PROBHD 5 mm CPPBBO BB  
 PULPROG zgpg30  
 TD 65536  
 SOLVENT CDCl3  
 NS 1024  
 DS 4  
 SWH 24038.461 Hz  
 FIDRES 0.366798 Hz  
 AQ 1.3631988 sec  
 RG 117.37  
 DW 20.800 usec  
 DE 18.00 usec  
 TE 297.0 K  
 D1 2.00000000 sec  
 D11 0.03000000 sec  
 TD0 1

===== CHANNEL f1 =====  
 SFO1 100.6233324 MHz  
 NUC1 13C  
 P1 10.00 usec  
 SI 32768  
 SF 100.6127689 MHz  
 WDW EM  
 SSB 0  
 LB 1.00 Hz  
 GB 0  
 PC 1.40

$^{13}\text{C}$  NMR (100 MHz) spectrum of compound **8** in  $\text{CDCl}_3$

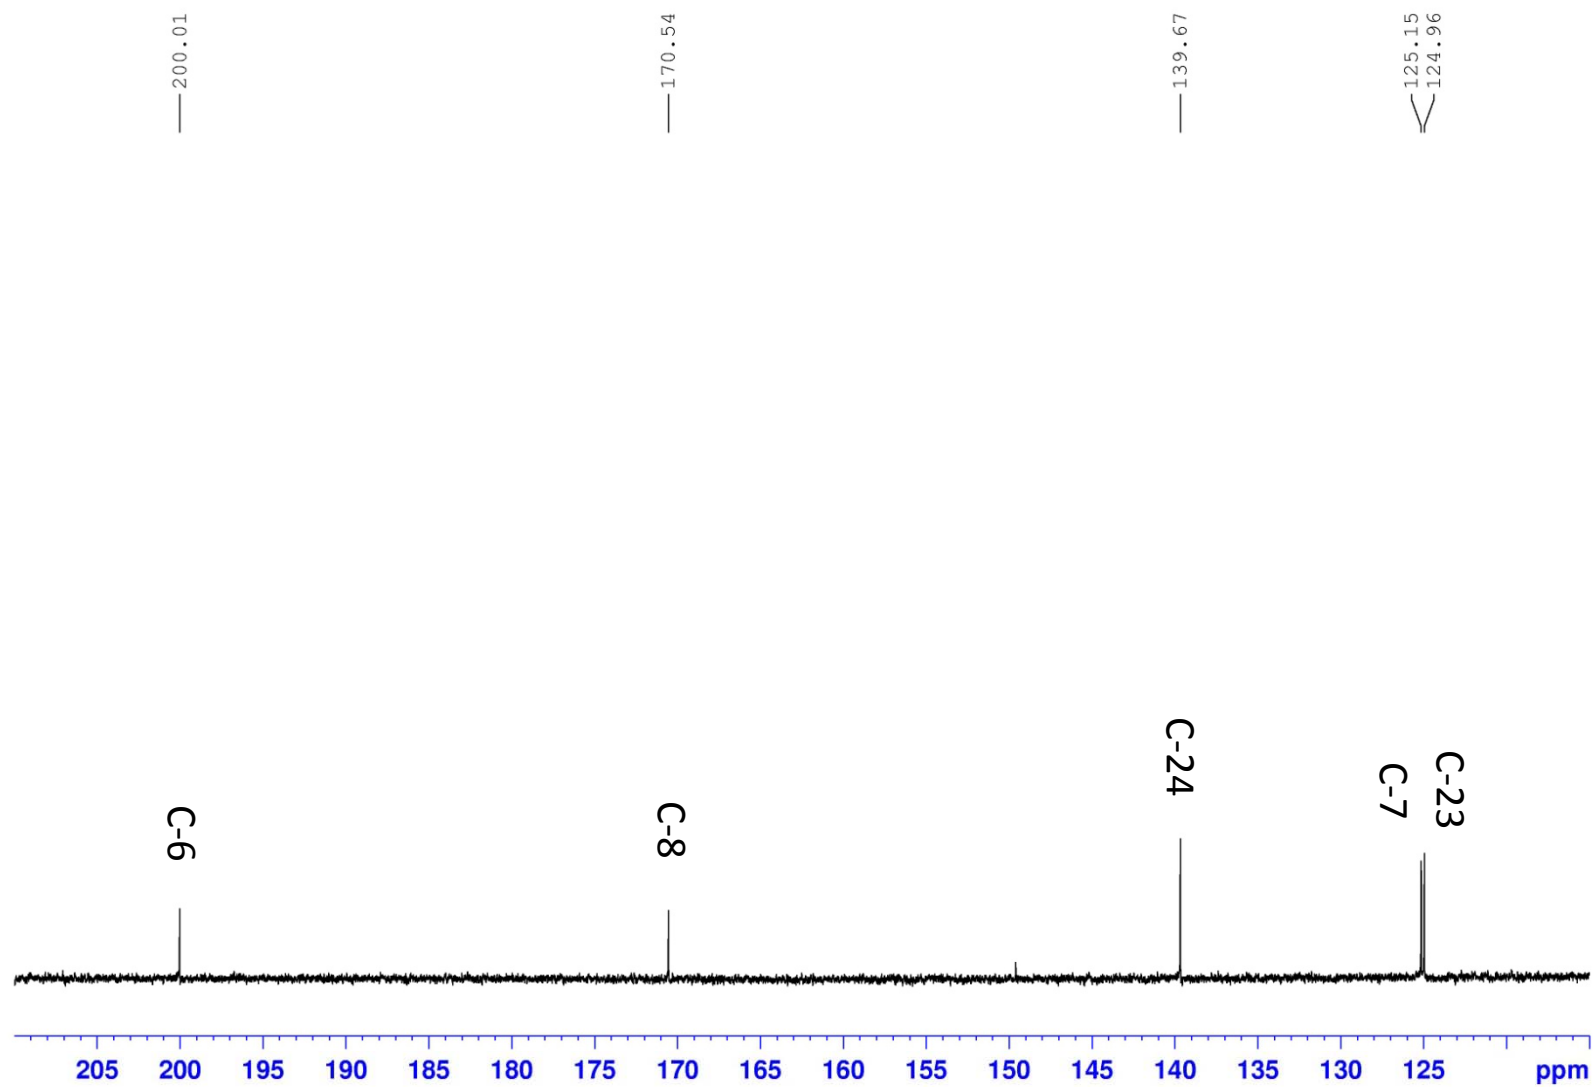

$^{13}\text{C}$  NMR (100 MHz) spectrum of compound **8** in  $\text{CDCl}_3$

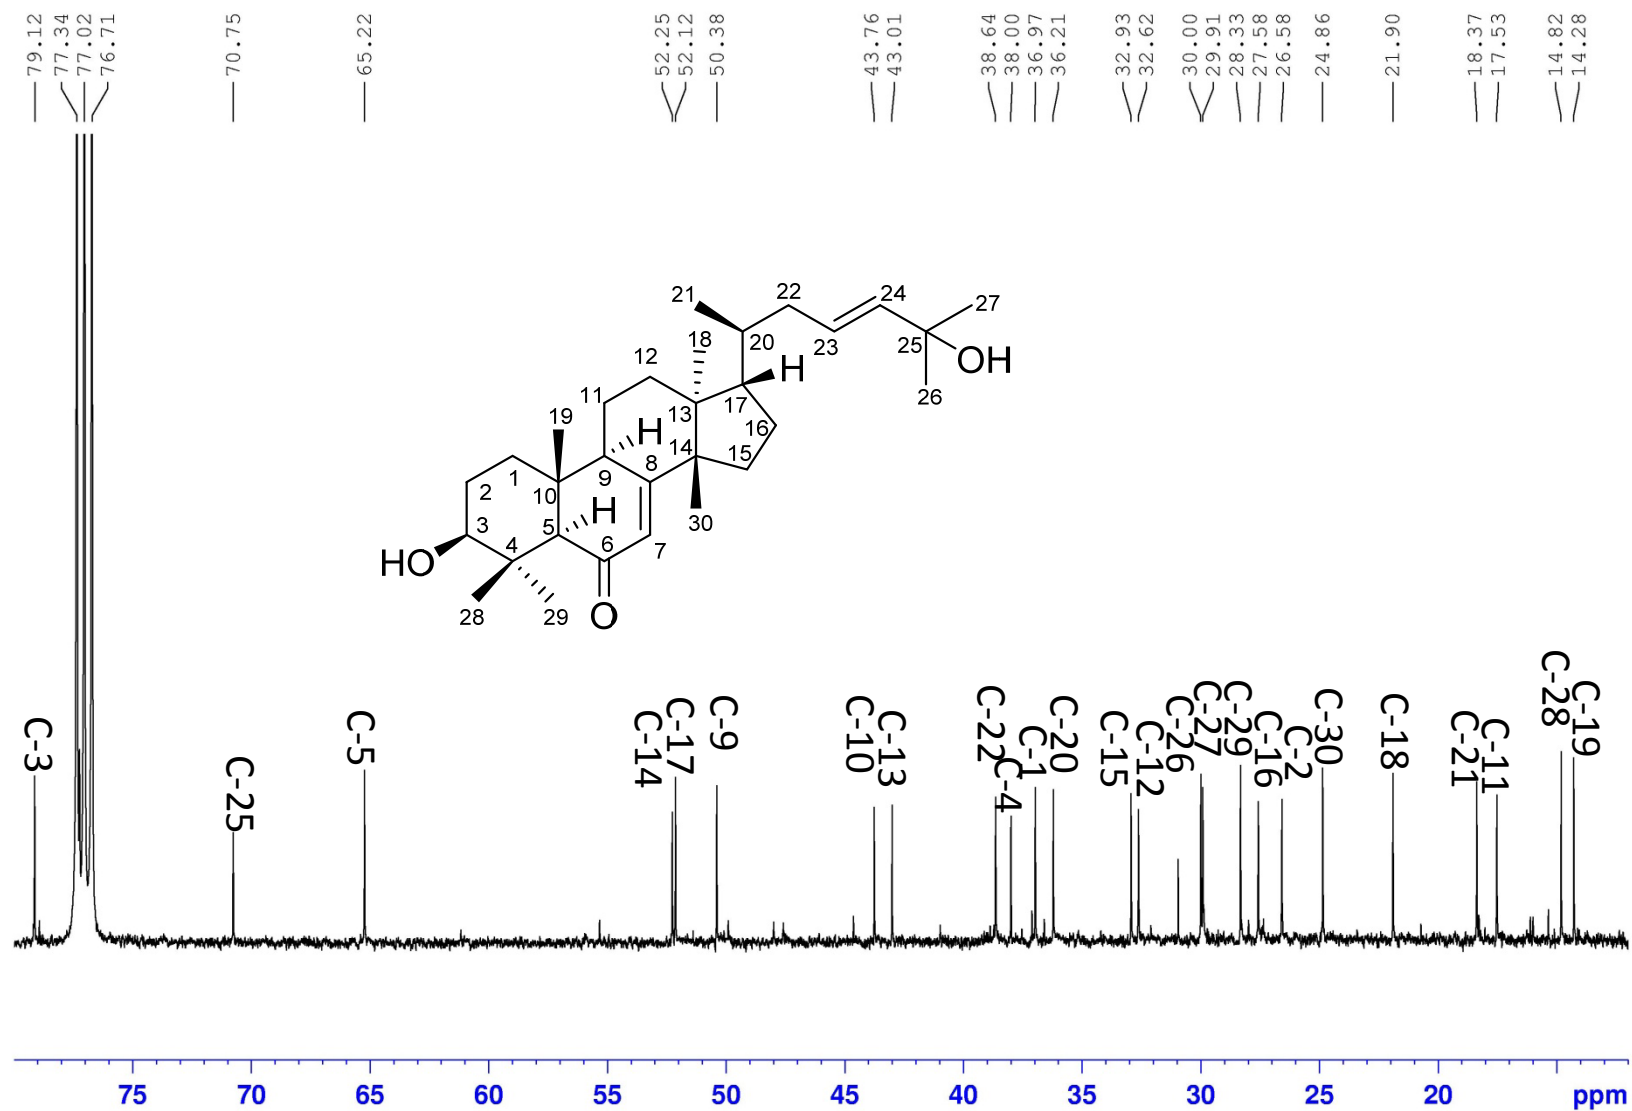

# DEPT135 (100 MHz) spectrum of compound **8** in CDCl<sub>3</sub>

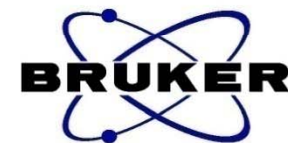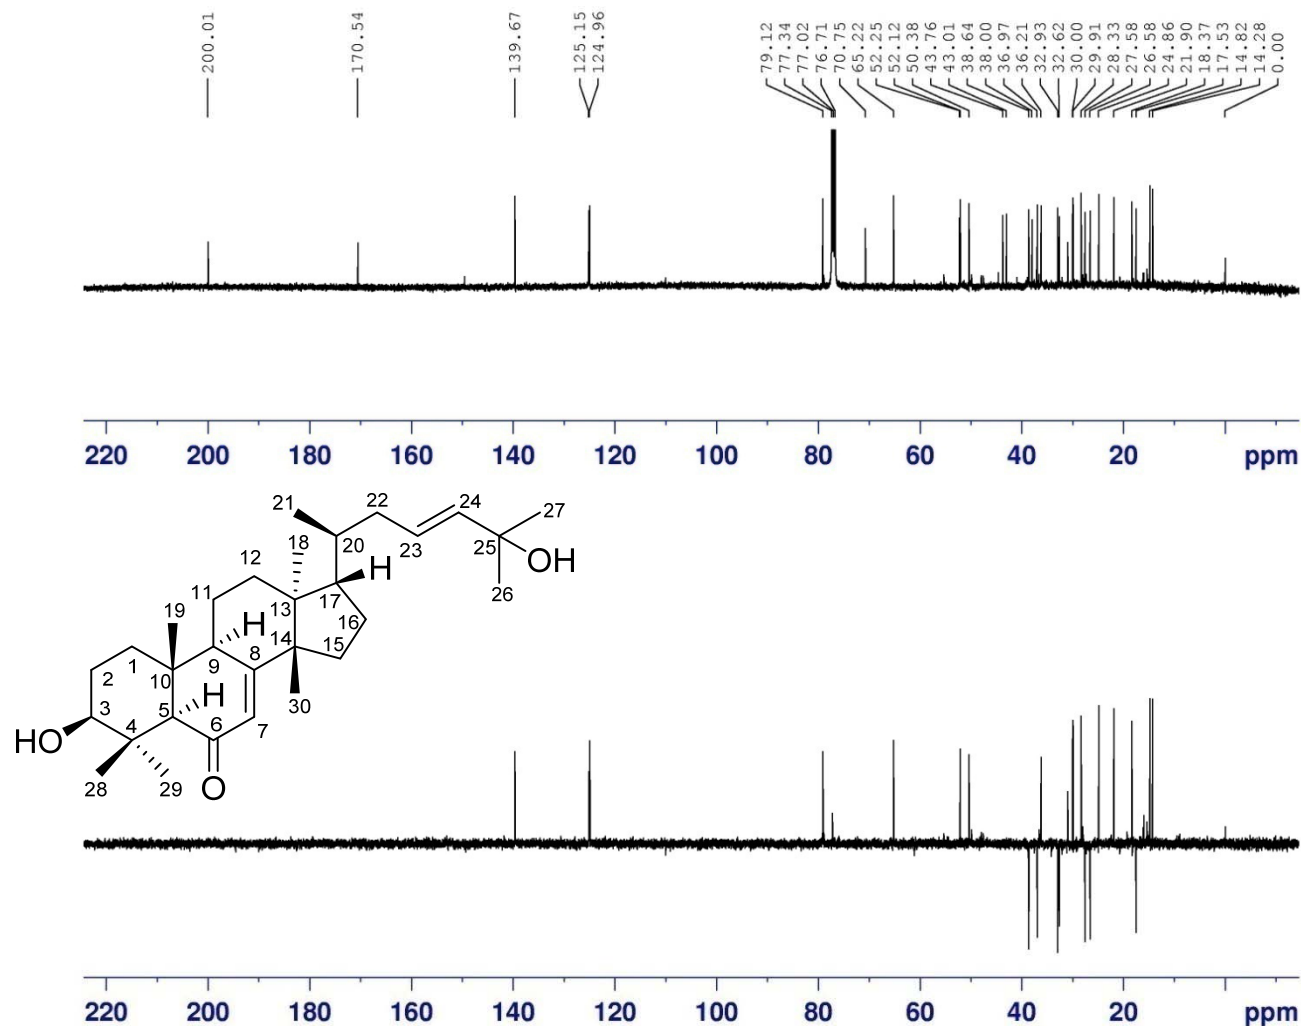

```

NAME          EA3-44-3-1
EXPNO          3
PROCNO         1
Date_          20171107
Time           3.07
INSTRUM        spect
PROBHD         5 mm CPPBBO BB
PULPROG        deptsp135
TD             65536
SOLVENT        CDCl3
NS             300
DS             4
SWH            24038.461 Hz
FIDRES         0.366798 Hz
AQ             1.3631988 sec
RG             130.26
DW            20.800 usec
DE            18.00 usec
TE            297.0 K
CNST2          145.0000000
D1            2.00000000 sec
D2            0.00344828 sec
D12           0.00002000 sec
TD0            1
    
```

```

===== CHANNEL f1 =====
SFO1          100.6233324 MHz
NUC1           13C
P1            10.00 usec
P13           2000.00 usec
SI            32768
SF            100.6127689 MHz
WDW           EM
SSB           0
LB            1.00 Hz
GB            0
PC            1.40
    
```

# DEPT135 (100 MHz) spectrum of compound **8** in CDCl<sub>3</sub>

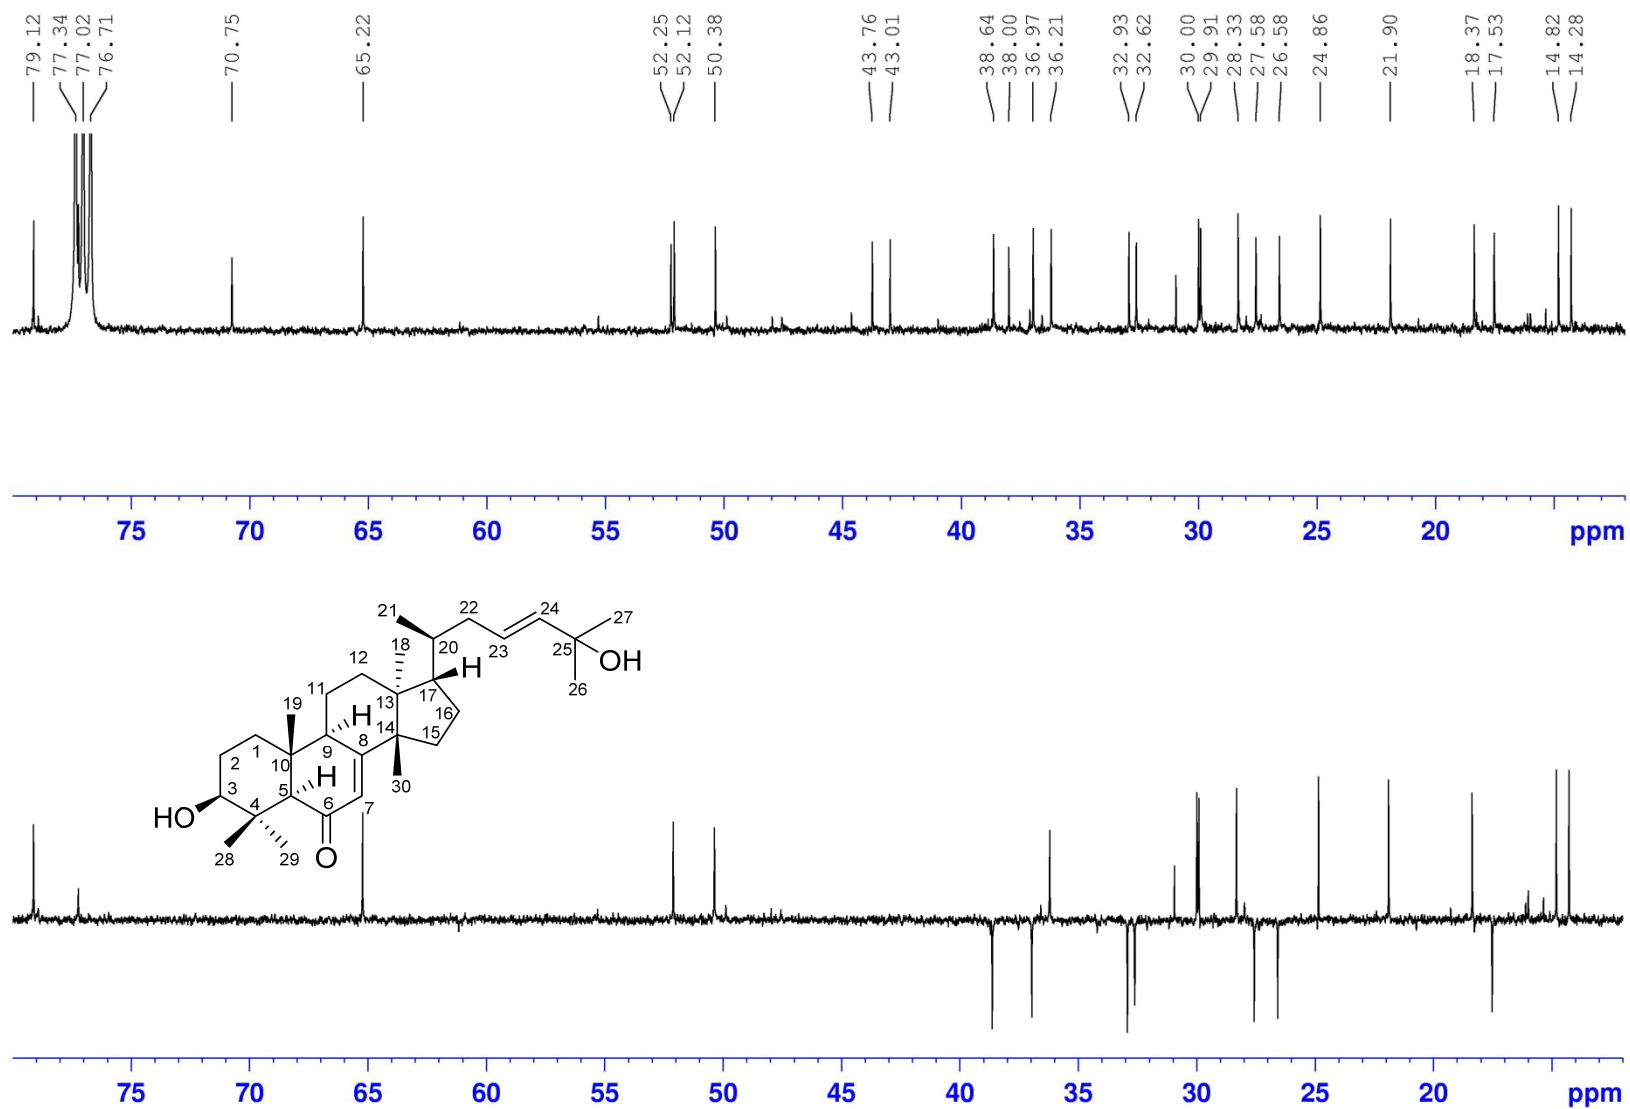



$^1\text{H}$ - $^1\text{H}$  COSY (400 MHz) spectrum of compound **8** in  $\text{CDCl}_3$

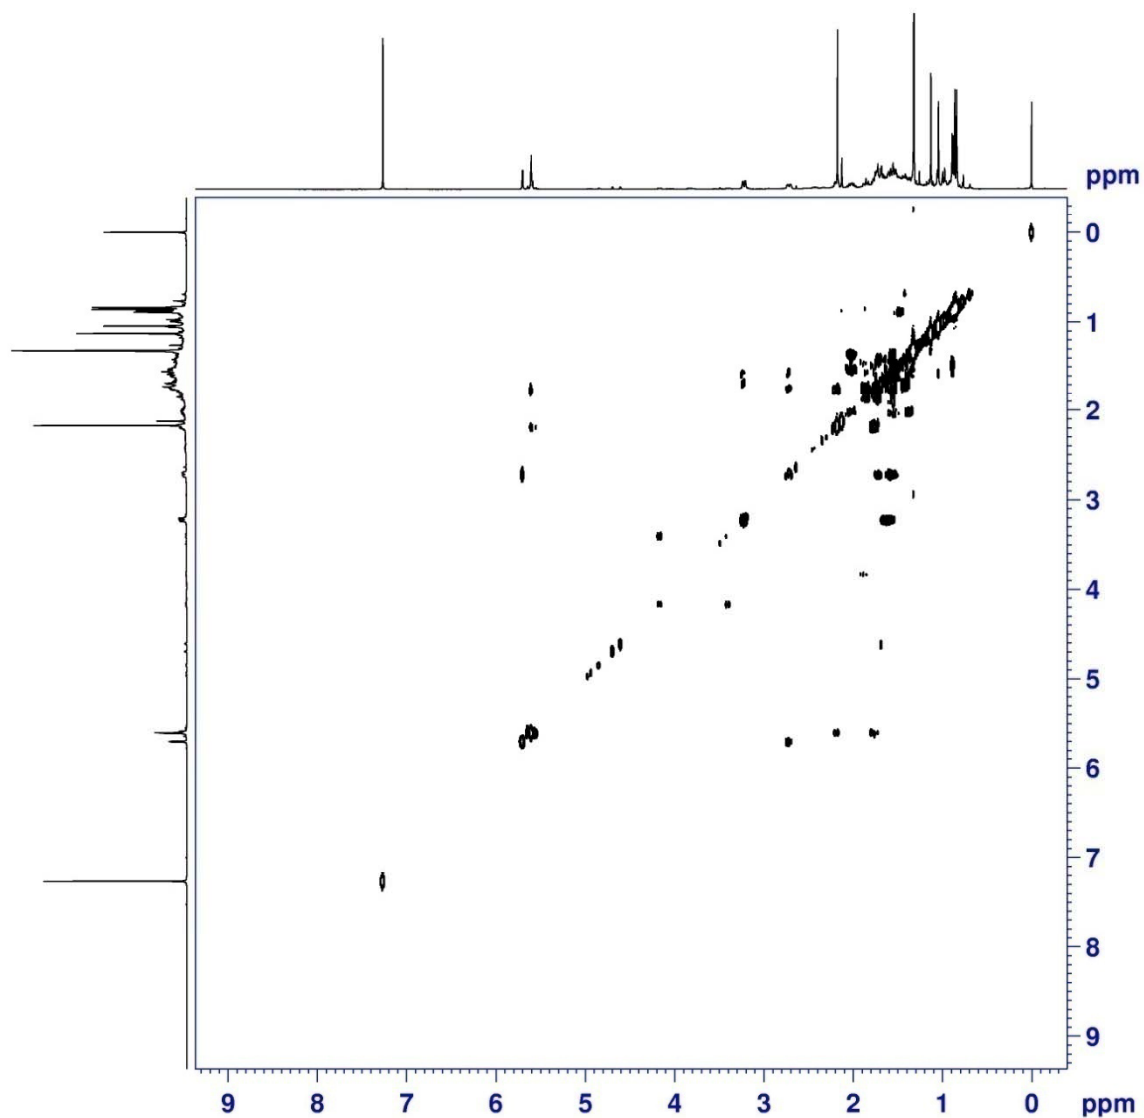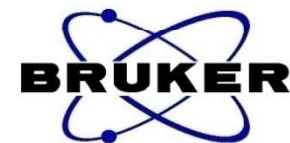

```

NAME          EA3-44-3-1
EXPNO          4
PROCNO         1
Date_         20171109
Time          16.41
INSTRUM        spect
PROBHD         5 mm CPPBBO BB
PULPROG        cosygpppqf
TD             2048
SOLVENT        CDCl3
NS              8
DS              8
SWH            3906.250 Hz
FIDRES         1.907349 Hz
AQ             0.2621940 sec
RG             208.5
DW             128.000 usec
DE             10.00 usec
TE             297.0 K
D0             0.00000300 sec
D1             1.89678097 sec
D11            0.03000000 sec
D12            0.00002000 sec
D13            0.00000400 sec
D16            0.00020000 sec
IN0            0.00025600 sec
  
```

```

===== CHANNEL f1 =====
SFO1          400.1318006 MHz
NUC1           1H
P0             11.50 usec
P1             11.50 usec
P17            2500.00 usec
ND0            1
TD             128
SFO1          400.1318 MHz
FIDRES         30.517578 Hz
SW             9.762 ppm
FnMODE         QF
SI             1024
SF            400.1300062 MHz
WDW            QSINE
SSB            0
LB             0.00 Hz
GB             0
PC             1.40
SI             1024
MC2            QF
SF            400.1300068 MHz
WDW            QSINE
SSB            0
LB             0.00 Hz
  
```

$^1\text{H}$ - $^1\text{H}$  COSY (400 MHz) spectrum of compound **8** in  $\text{CDCl}_3$

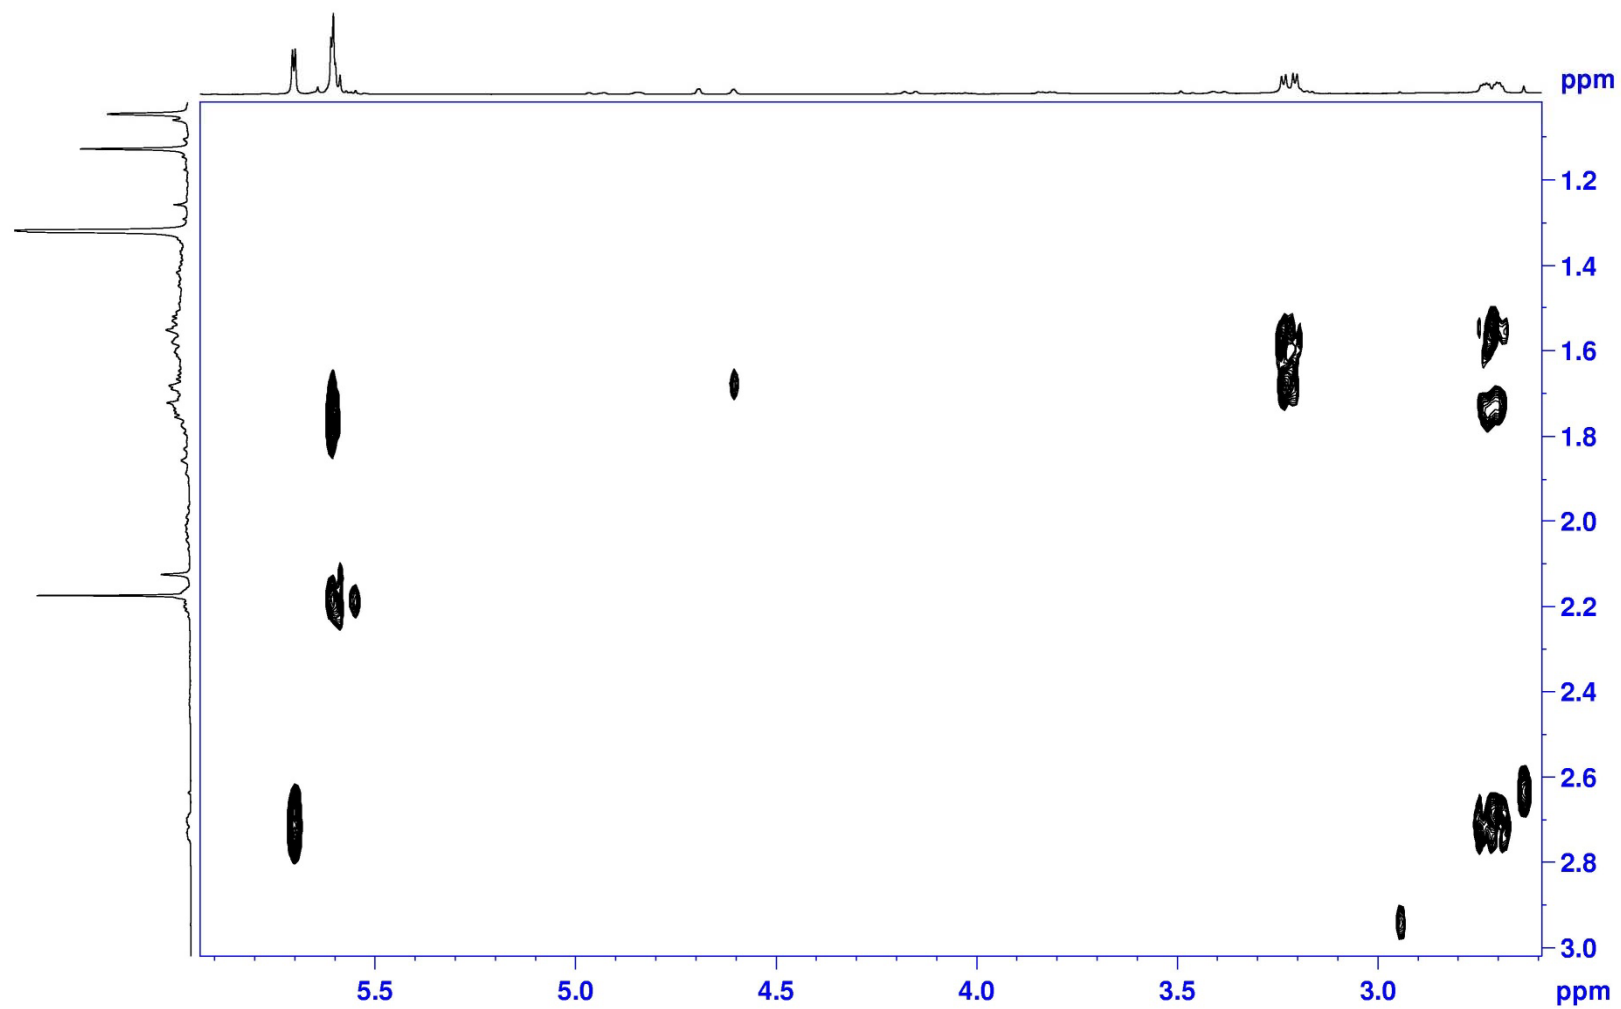

$^1\text{H}$ - $^1\text{H}$  COSY (400 MHz) spectrum of compound **8** in  $\text{CDCl}_3$

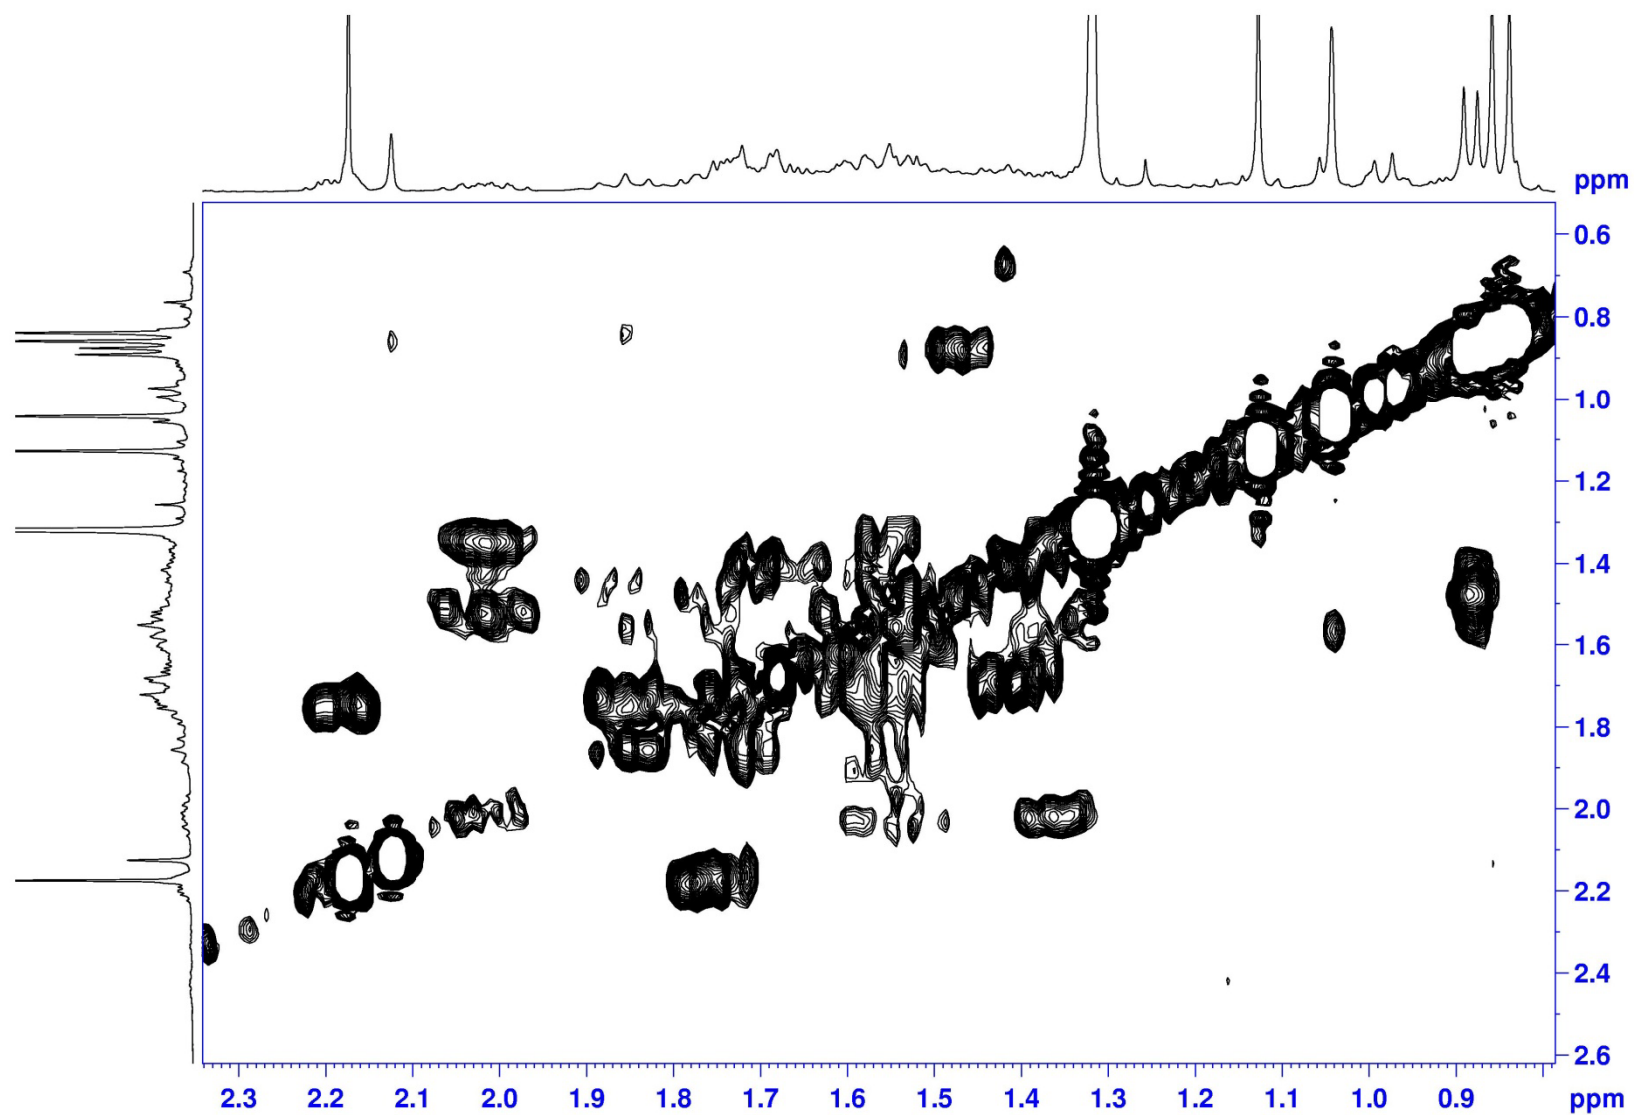

$^1\text{H}$ - $^1\text{H}$  COSY (400 MHz) spectrum of compound **8** in  $\text{CDCl}_3$

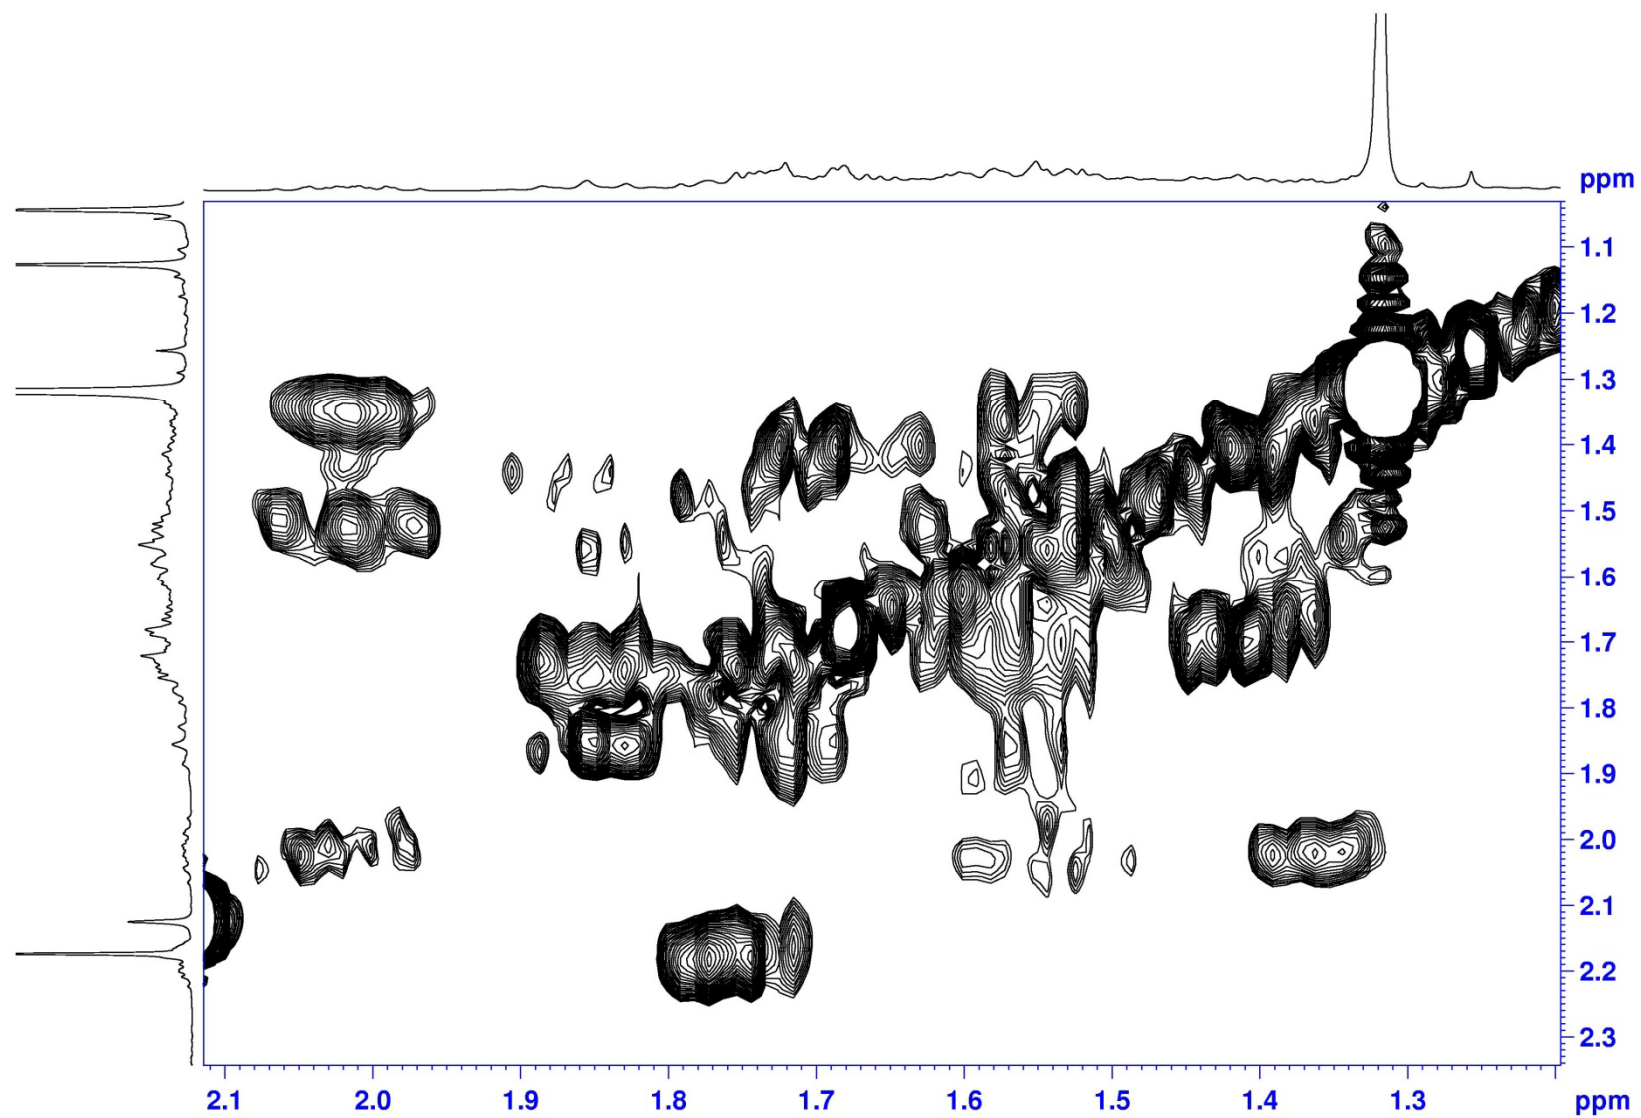

# HSQC (400 MHz) spectrum of compound **8** in CDCl<sub>3</sub>

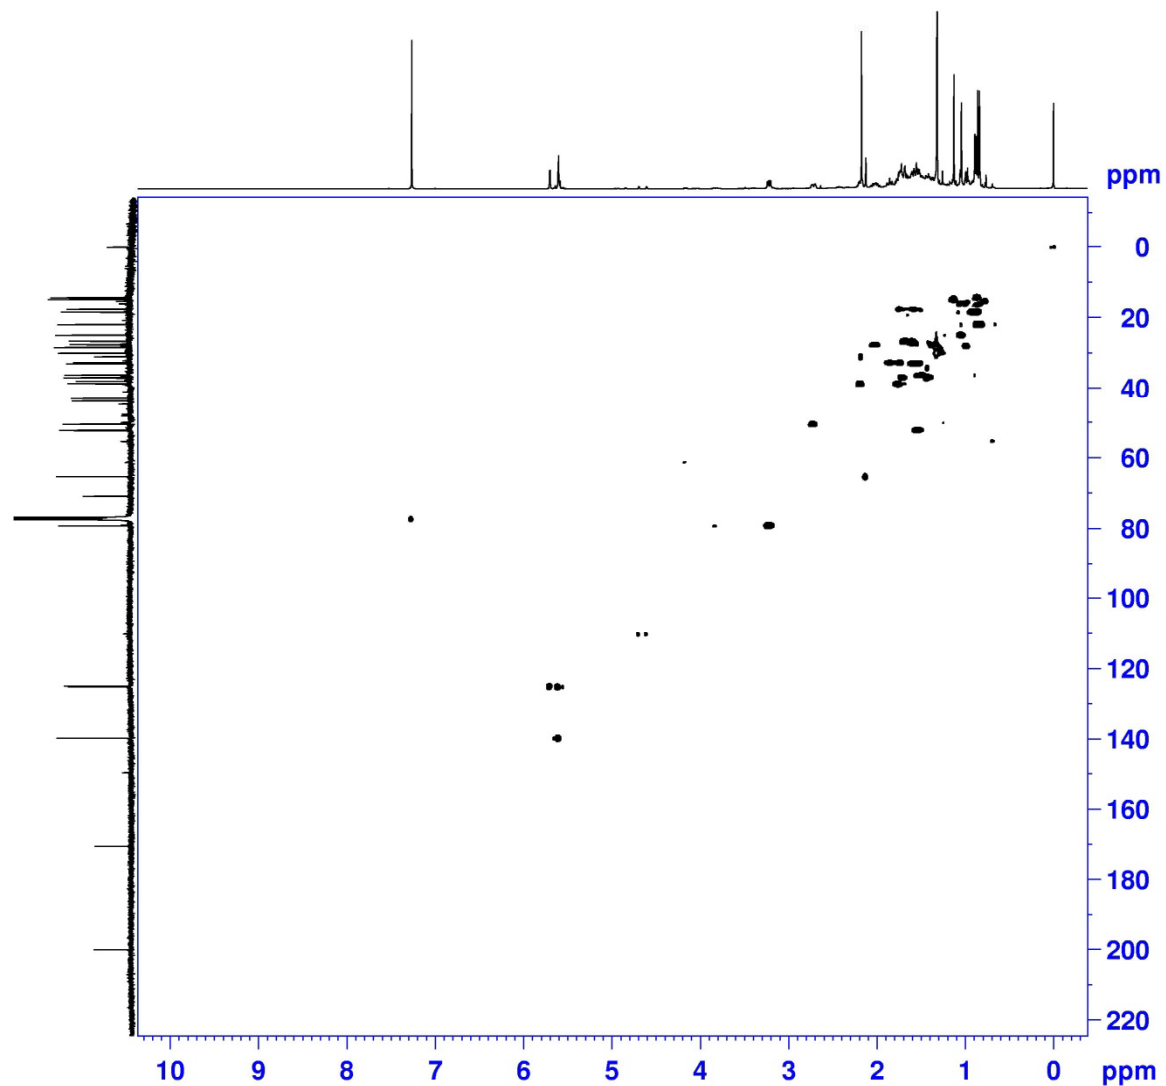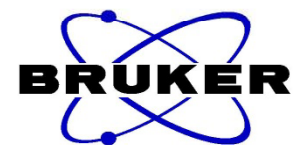

```

NAME          EA3-44-3-1
EXPNO          5
PROCNO         1
Date_         20171109
Time          17.20
INSTRUM        spect
PROBHD         5 mm CFPBBO BB
PULPROG        hsqcetgpsi2
TD            1024
SOLVENT        CDCl3
NS             16
DS             16
SWH            4302.926 Hz
FIDRES         4.202076 Hz
AQ             0.1190388 sec
RG            208.5
DW            116.200 usec
DE             10.00 usec
TE            297.0 K
CNST2          145.0000000
D0             0.00000300 sec
D1            1.46497905 sec
D4            0.00172414 sec
D11           0.03000000 sec
D16           0.00020000 sec
D24           0.00086207 sec
IN0           0.00002080 sec
ZGPTNS
  
```

```

===== CHANNEL f1 =====
SF01          400.1320007 MHz
NUC1           1H
P1            11.50 usec
P2            23.00 usec
P28           0.00 usec
ND0           2
TD            256
SF01          100.6233 MHz
FIDRES         93.900238 Hz
SW            238.896 ppm
FnMODE        Echo-Antiecho
SI            1024
SF            400.1300033 MHz
WDW           QSINE
SSB           2
LB            0.00 Hz
GB            0
PC            1.40
SI            1024
MC2           echo-antiecho
SF            100.6127549 MHz
WDW           QSINE
  
```

HSQC (400 MHz) spectrum of compound **8** in  $\text{CDCl}_3$

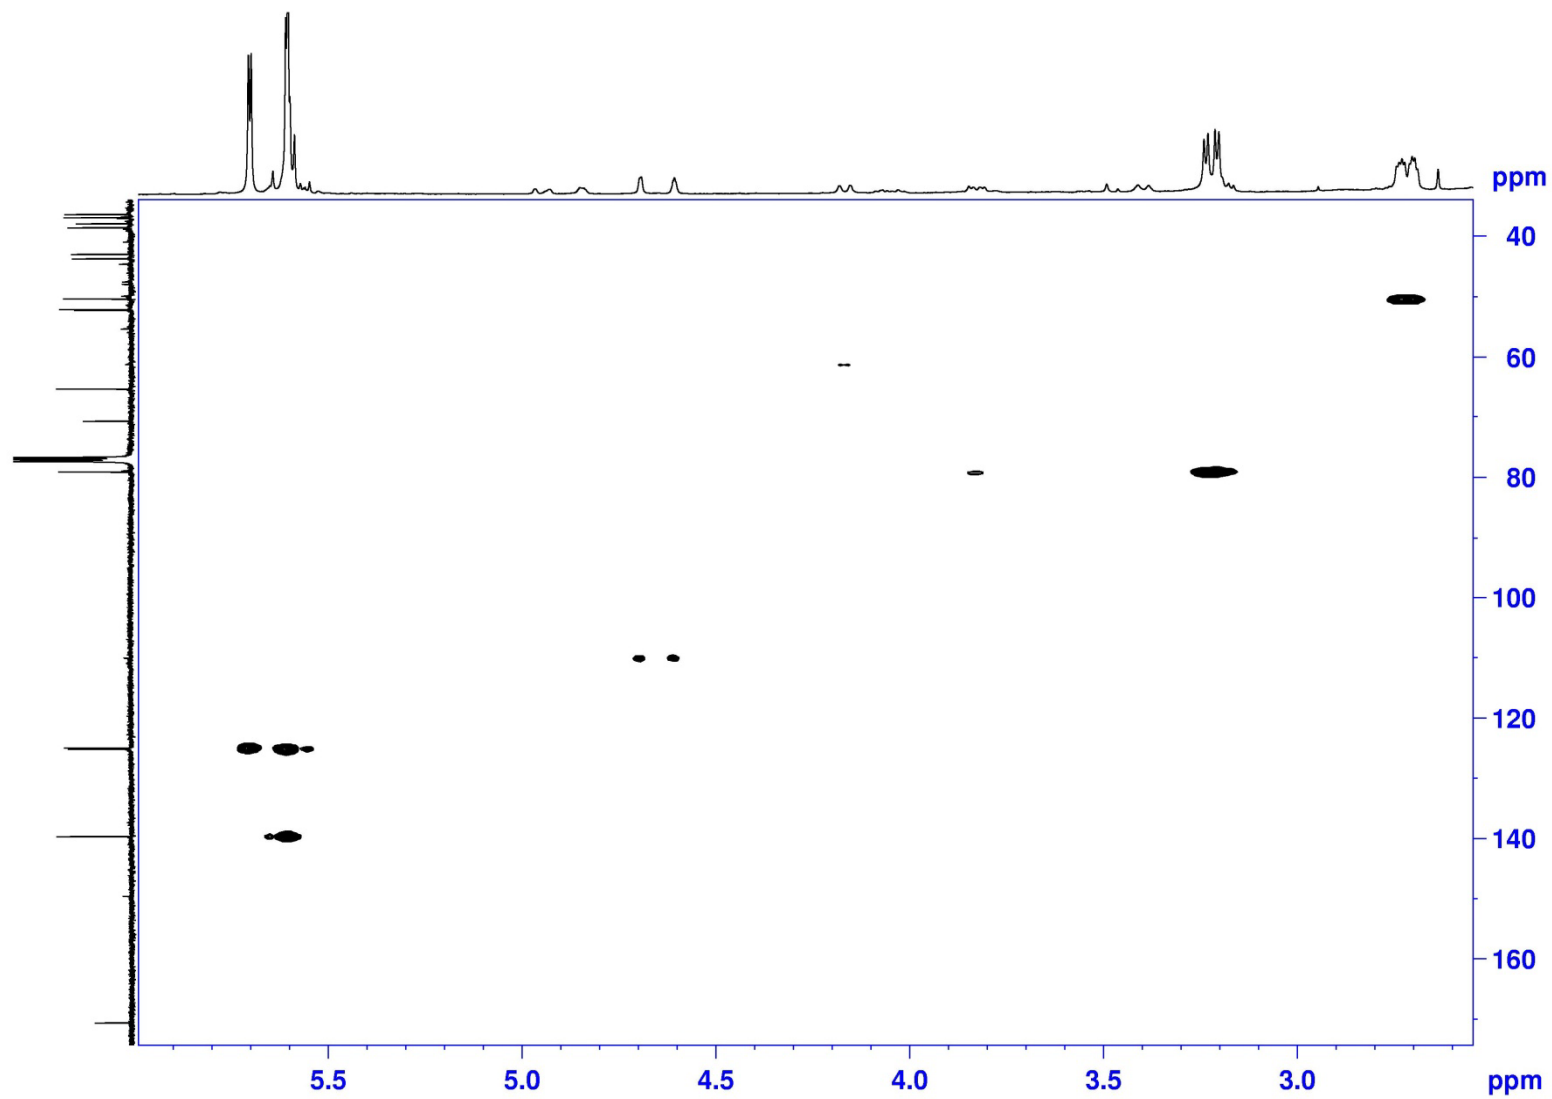

HSQC (400 MHz) spectrum of compound **8** in CDCl<sub>3</sub>

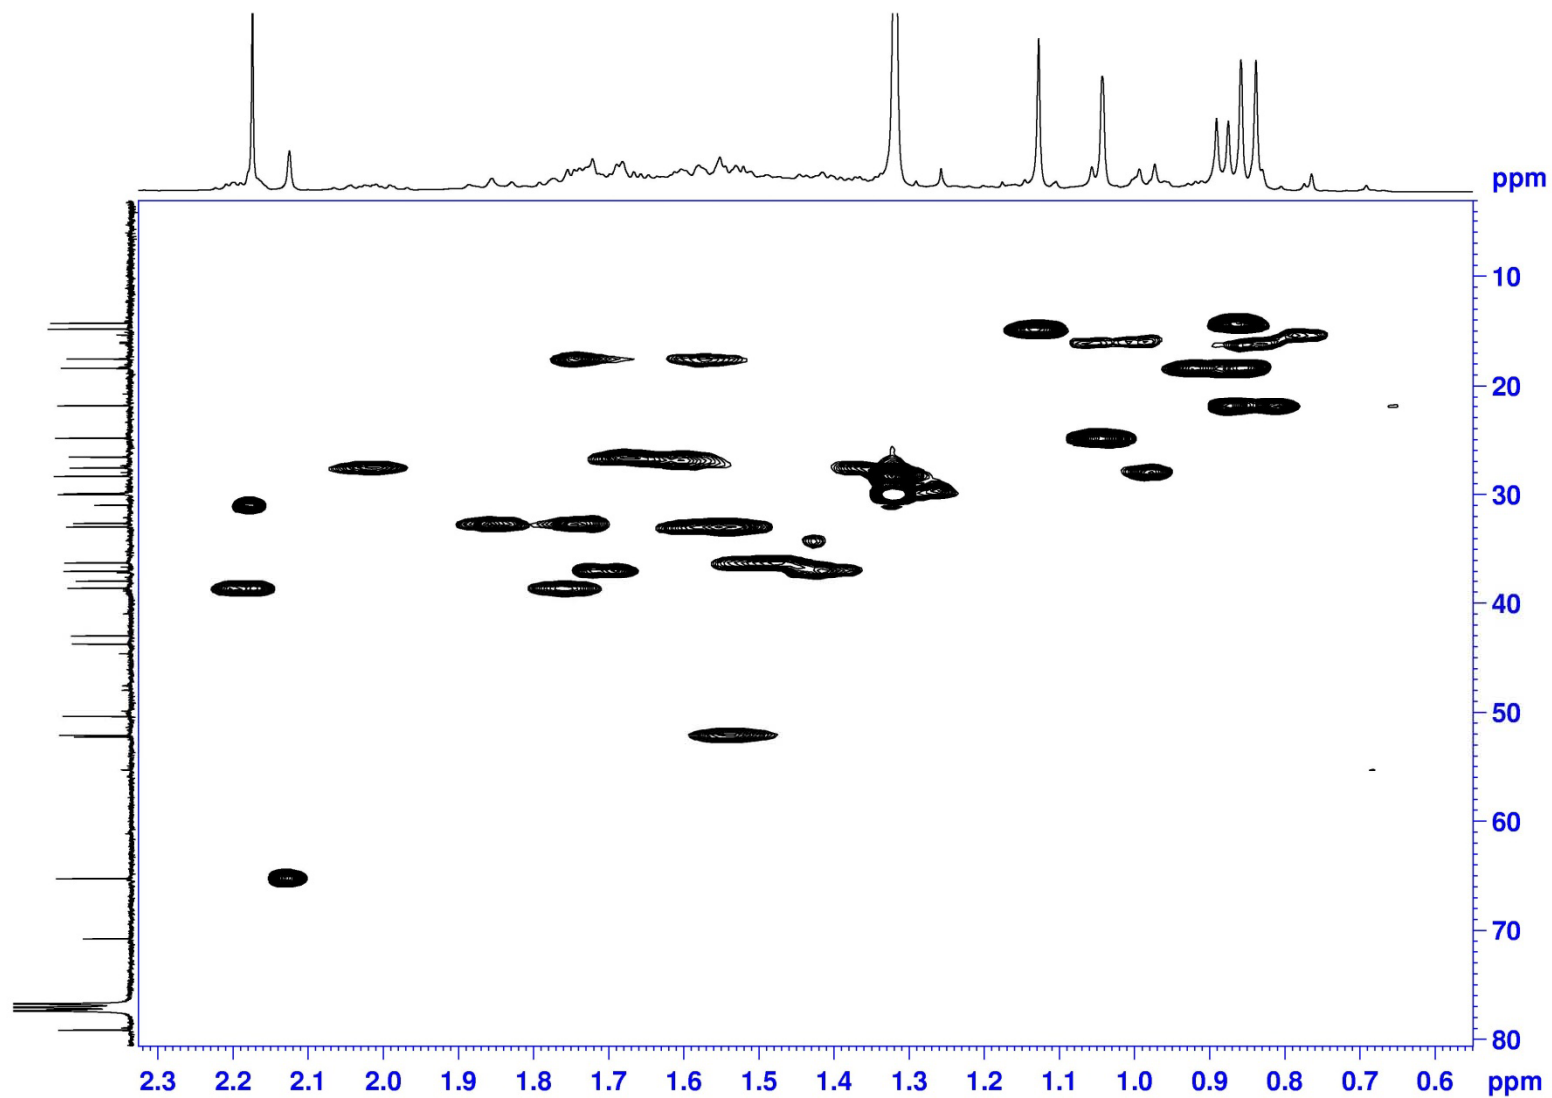

HSQC (400 MHz) spectrum of compound **8** in CDCl<sub>3</sub>

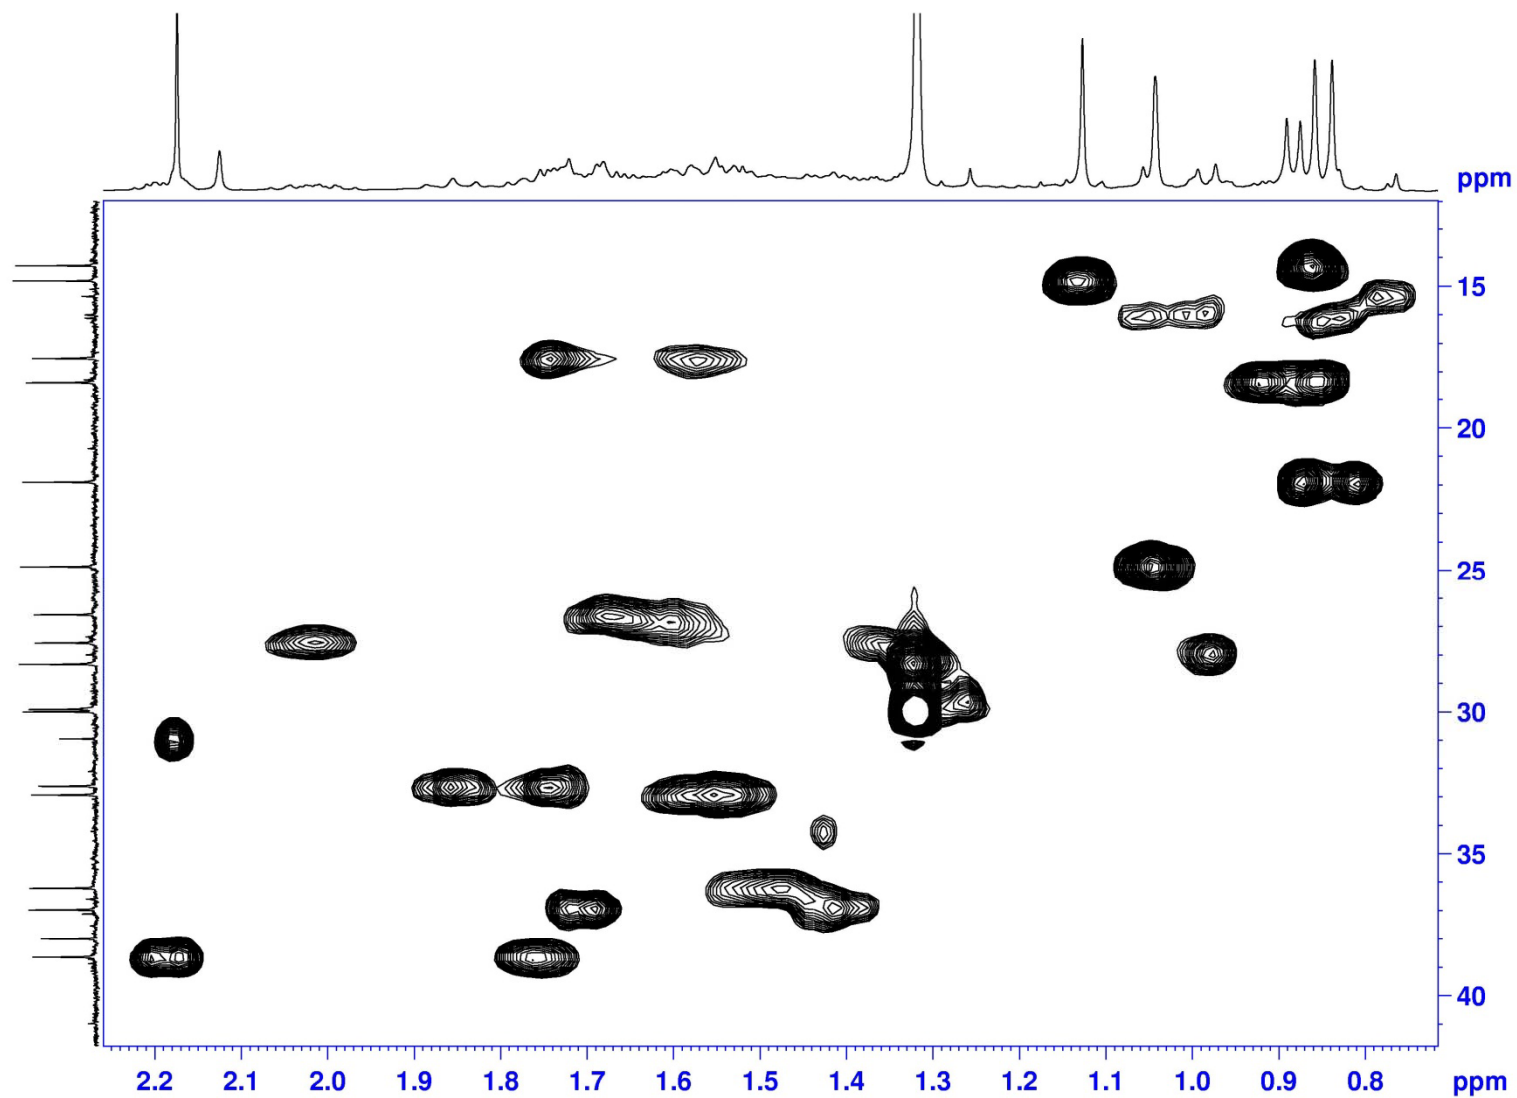



# HMBC (400 MHz) spectrum of compound **8** in CDCl<sub>3</sub>

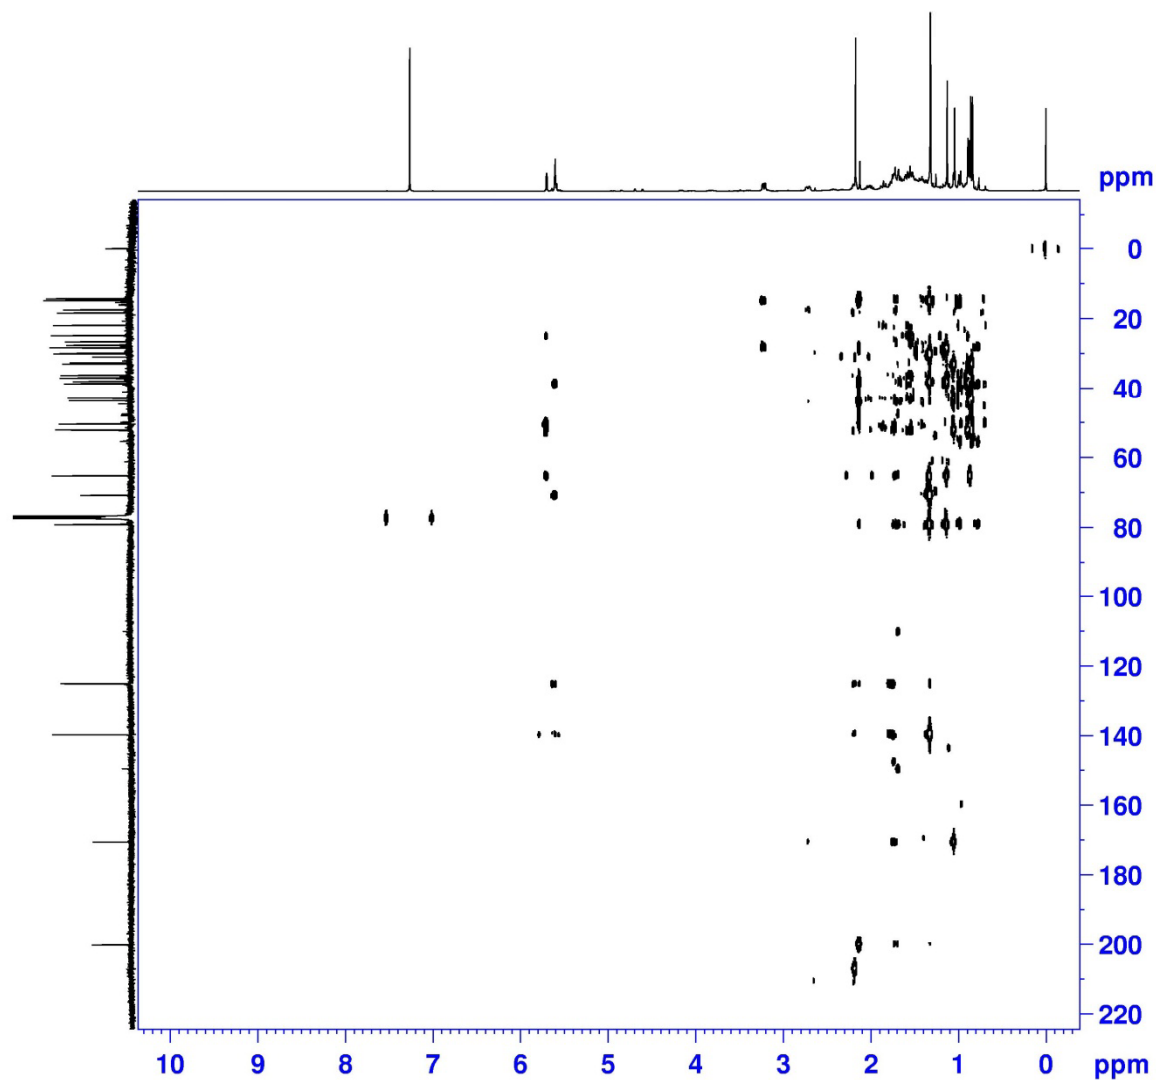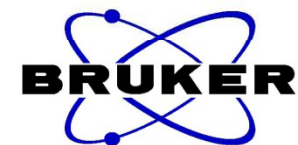

```

NAME          EA3-44-3-1
EXPNO         6
PROCNO        1
Date_         20171109
Time          19.11
INSTRUM       spect
PROBHD        5 mm CPPBBO BB
PULPROG       hmbcgp1pndqf
TD            4096
SOLVENT       CDCl3
NS            32
DS            16
SWH           5197.505 Hz
FIDRES        1.268922 Hz
AQ            0.3940852 sec
RG            208.5
DW            96.200 usec
DE            10.00 usec
TE            297.0 K
CNST2         145.0000000
CNST13        10.0000000
D0            0.00000300 sec
D1            1.50000000 sec
D2            0.00344828 sec
D6            0.05000000 sec
D16           0.00020000 sec
IN0           0.00002080 sec
  
```

```

===== CHANNEL f1 =====
SF01          400.1323208 MHz
NUC1           1H
P1             11.50 usec
P2             23.00 usec
ND0            2
TD            128
SF01          100.6233 MHz
FIDRES         187.800476 Hz
SW             238.896 ppm
F0MODE         QF
SI             2048
SF            400.1300051 MHz
WDW            SINE
SSB            0
LB             0.00 Hz
GB             0
PC             1.40
SI            1024
MC2            QF
SF            100.6127717 MHz
WDW            SINE
SSB            0
LB             0.00 Hz
  
```

HMBC (400 MHz) spectrum of compound **8** in CDCl<sub>3</sub>

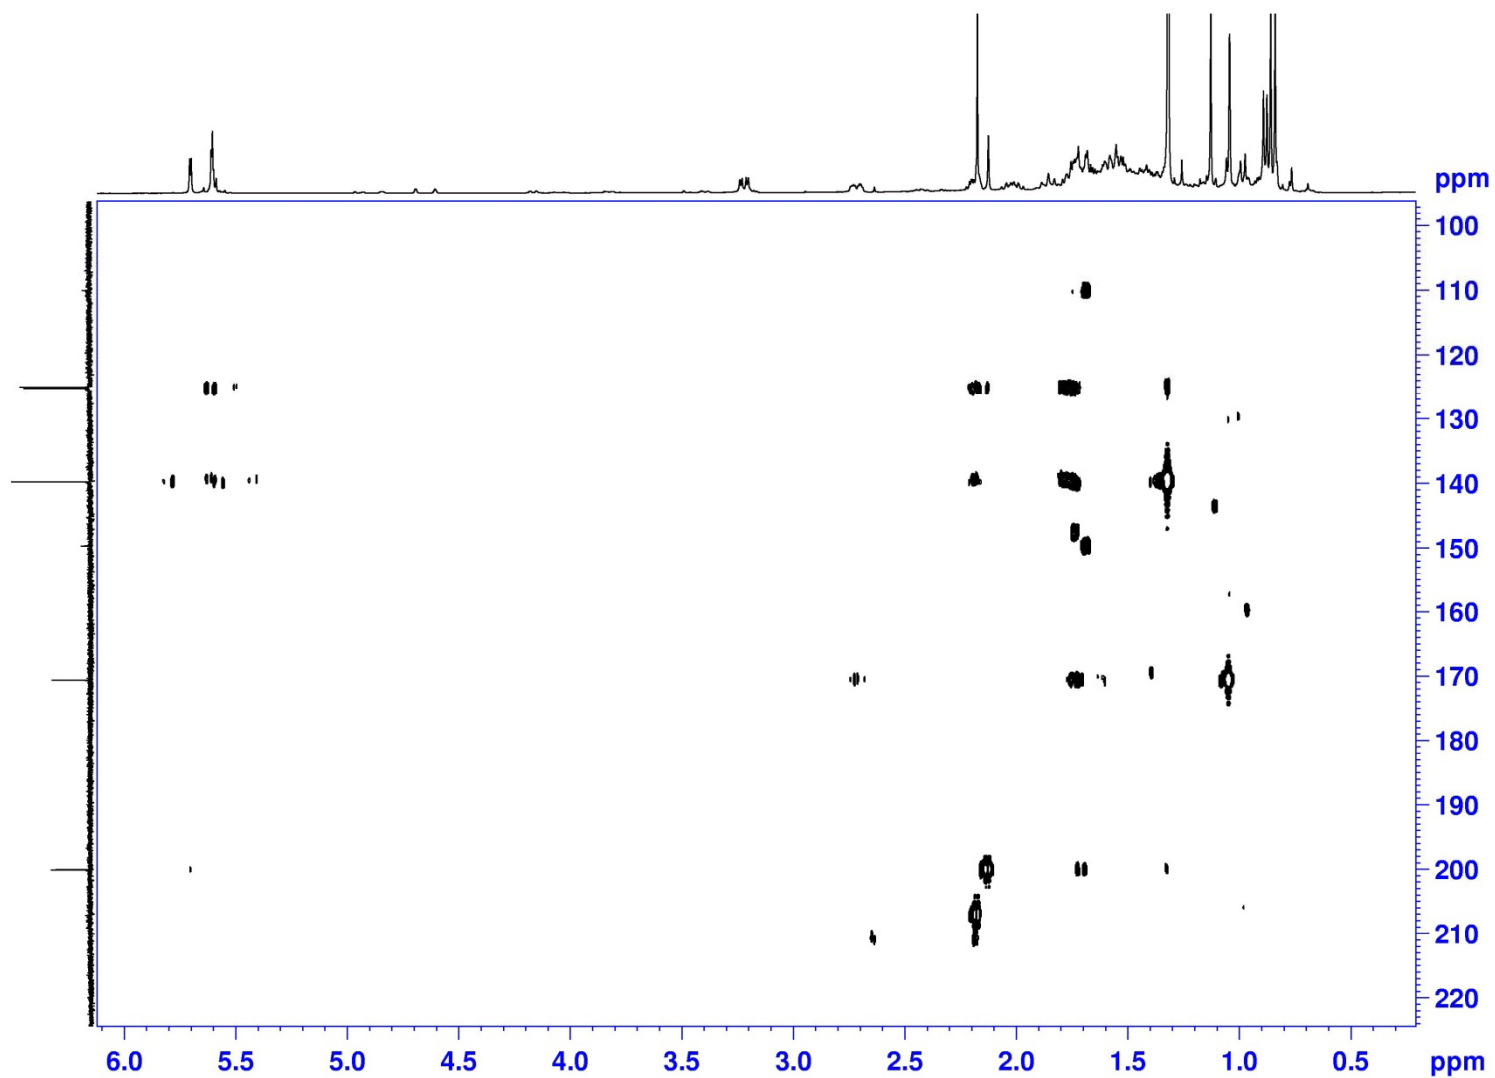

HMBC (400 MHz) spectrum of compound **8** in CDCl<sub>3</sub>

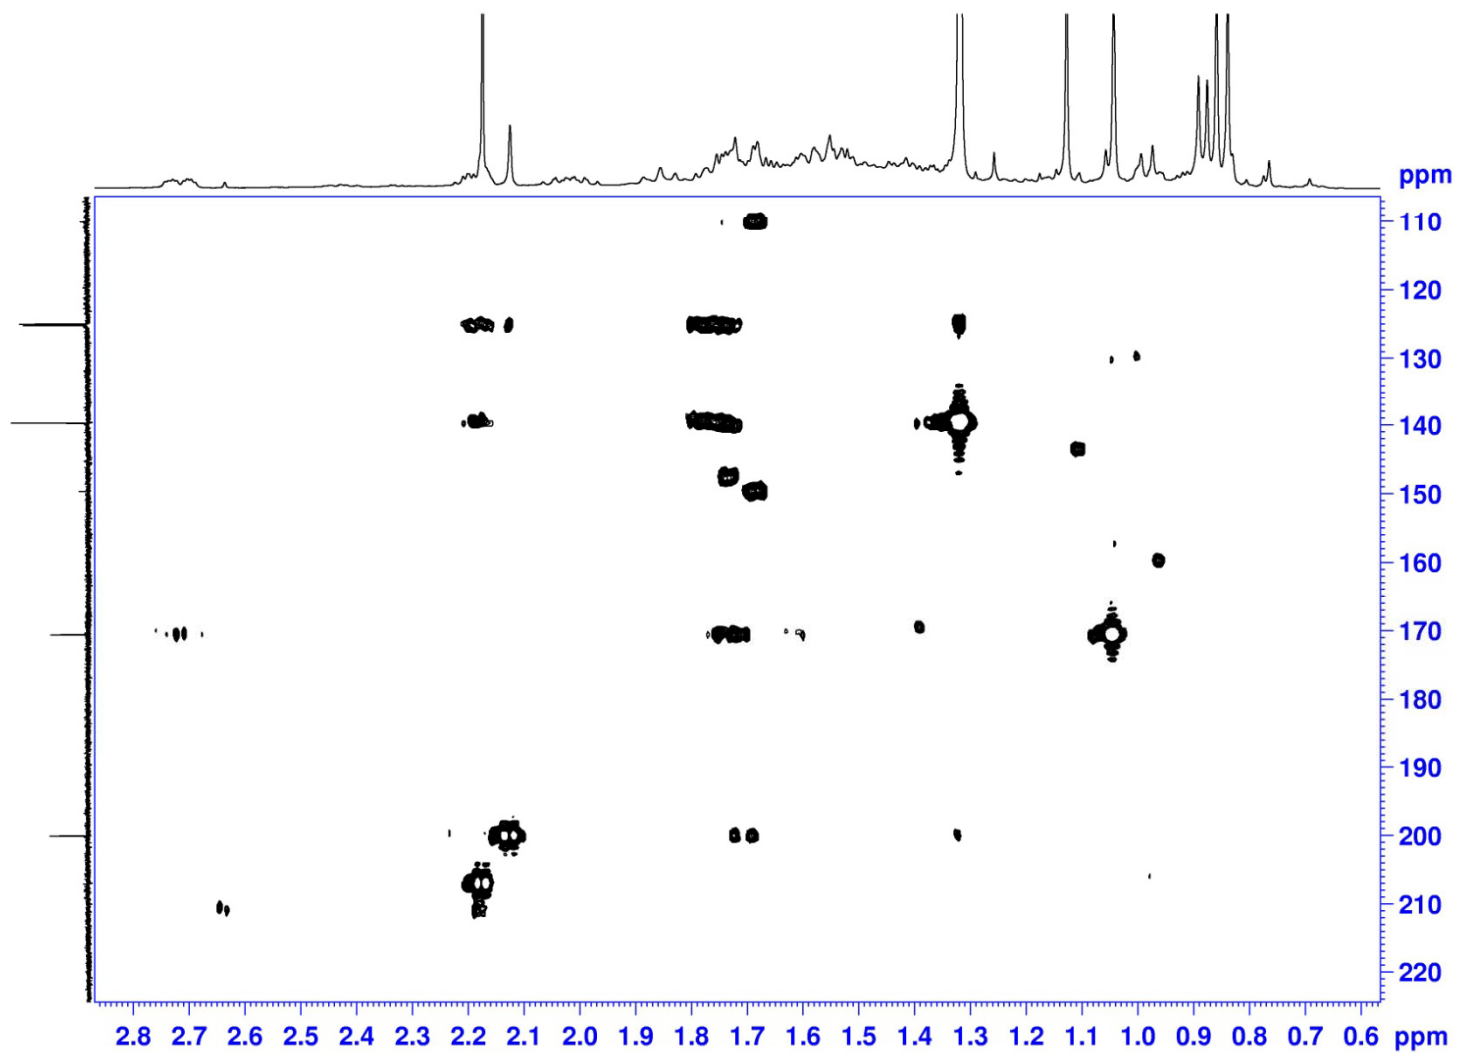

HMBC (400 MHz) spectrum of compound **8** in CDCl<sub>3</sub>

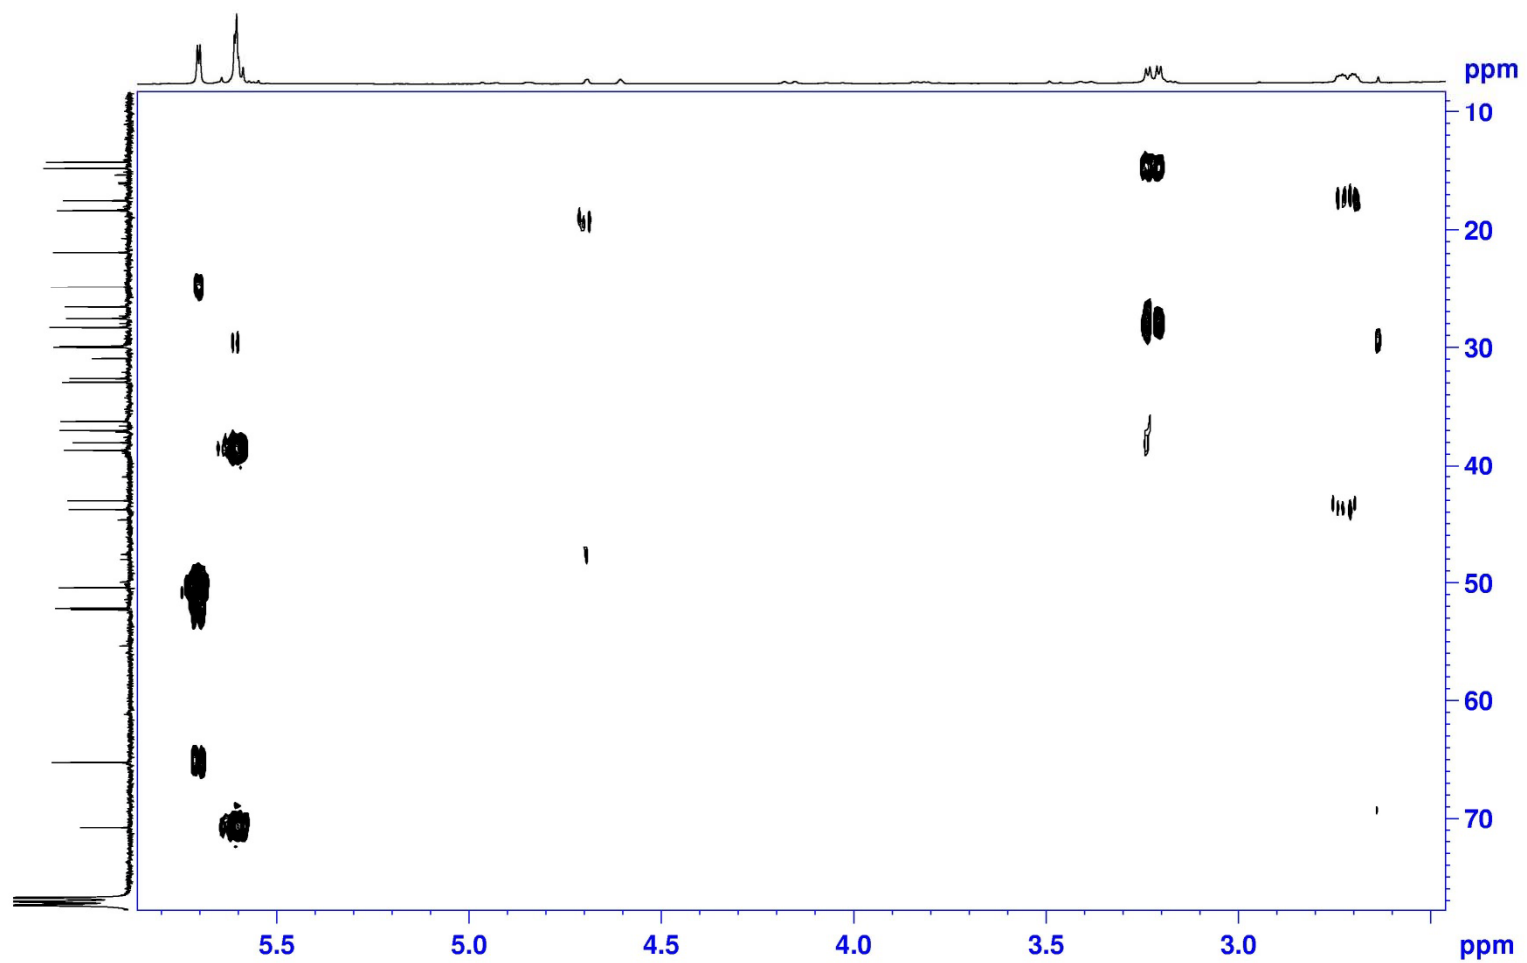

HMBC (400 MHz) spectrum of compound **8** in CDCl<sub>3</sub>

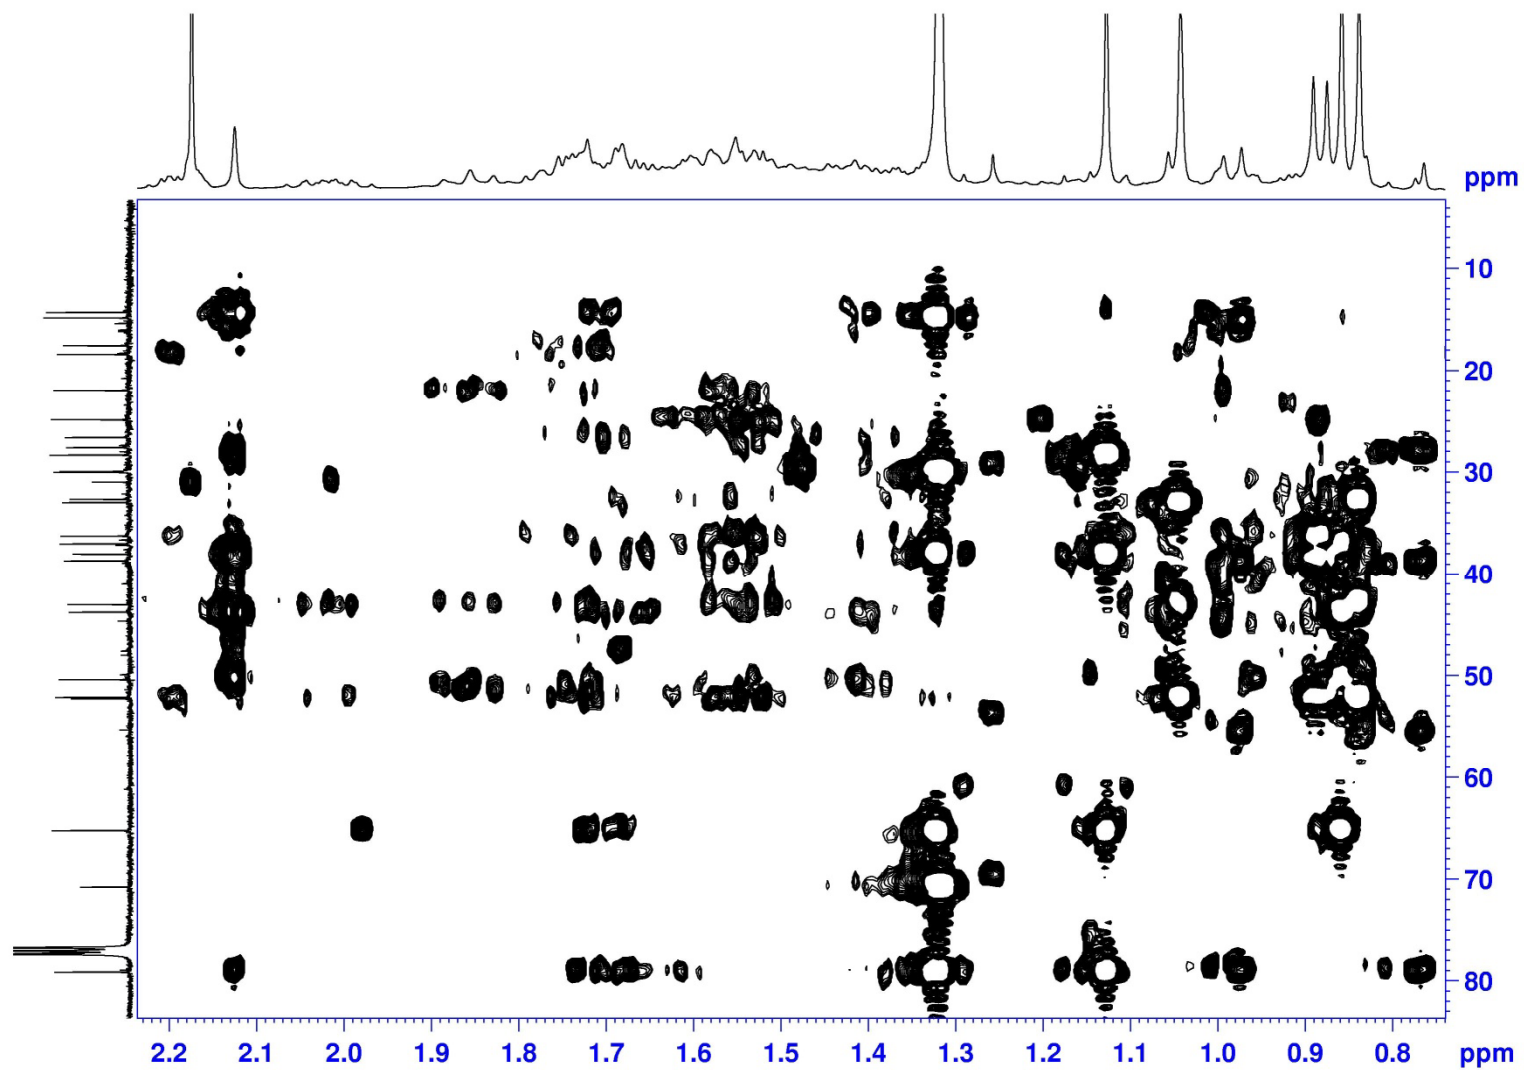

HMBC (400 MHz) spectrum of compound **8** in CDCl<sub>3</sub>

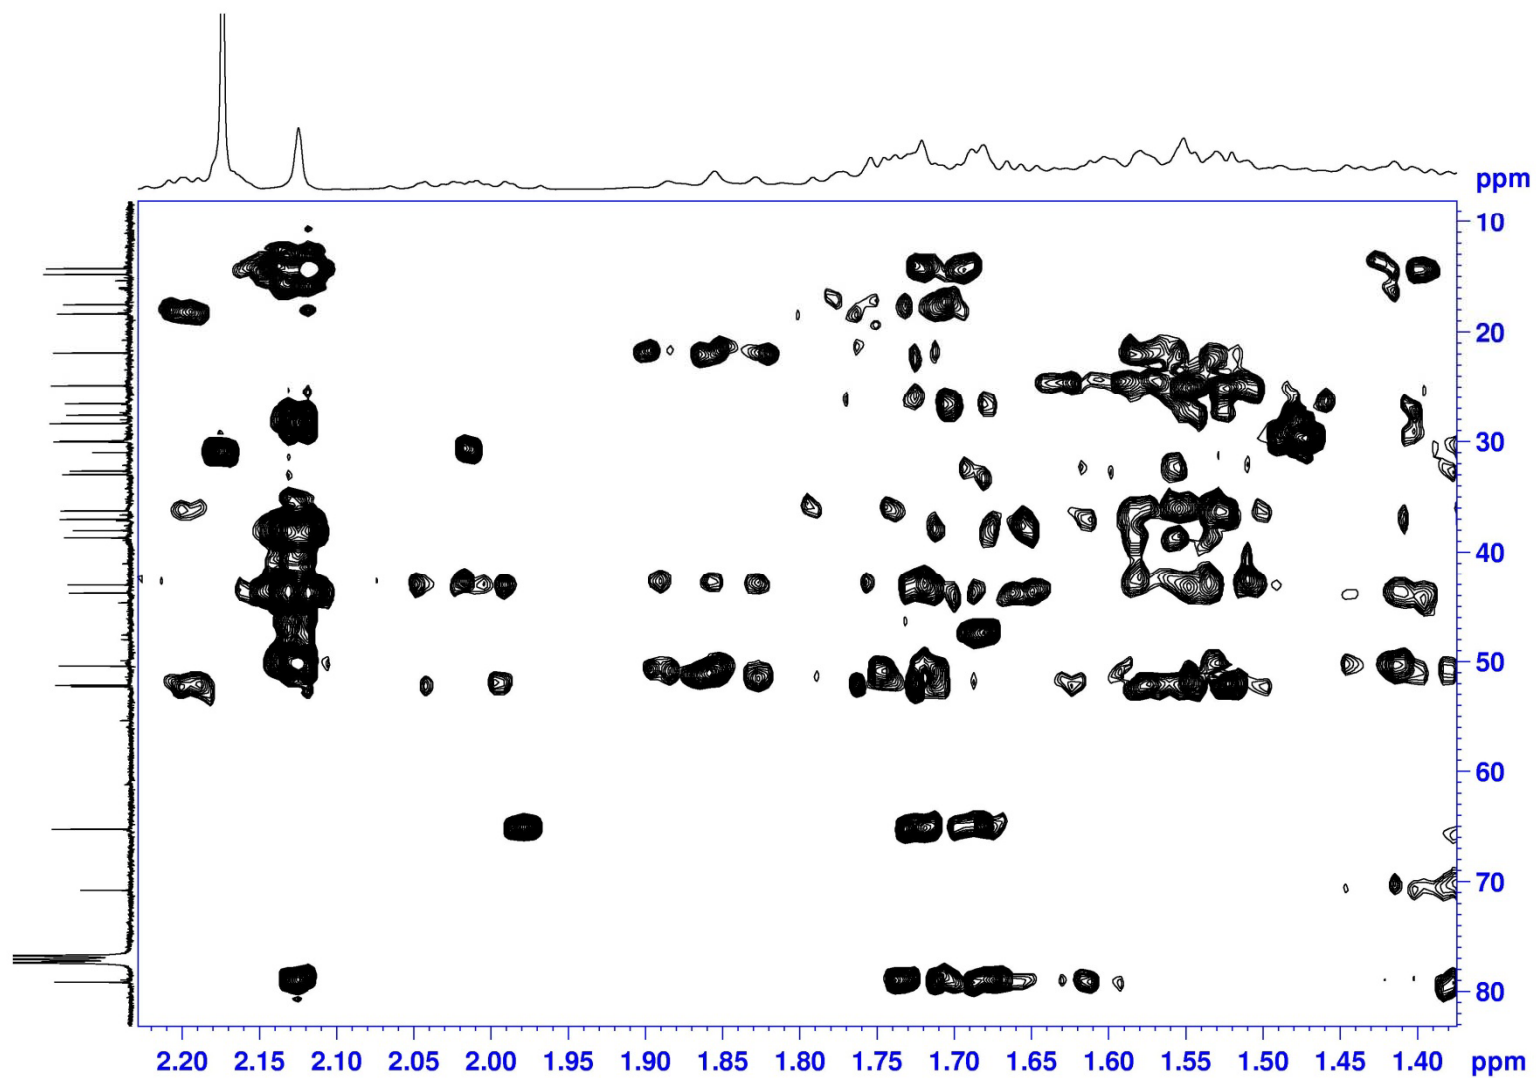

HMBC (400 MHz) spectrum of compound **8** in CDCl<sub>3</sub>

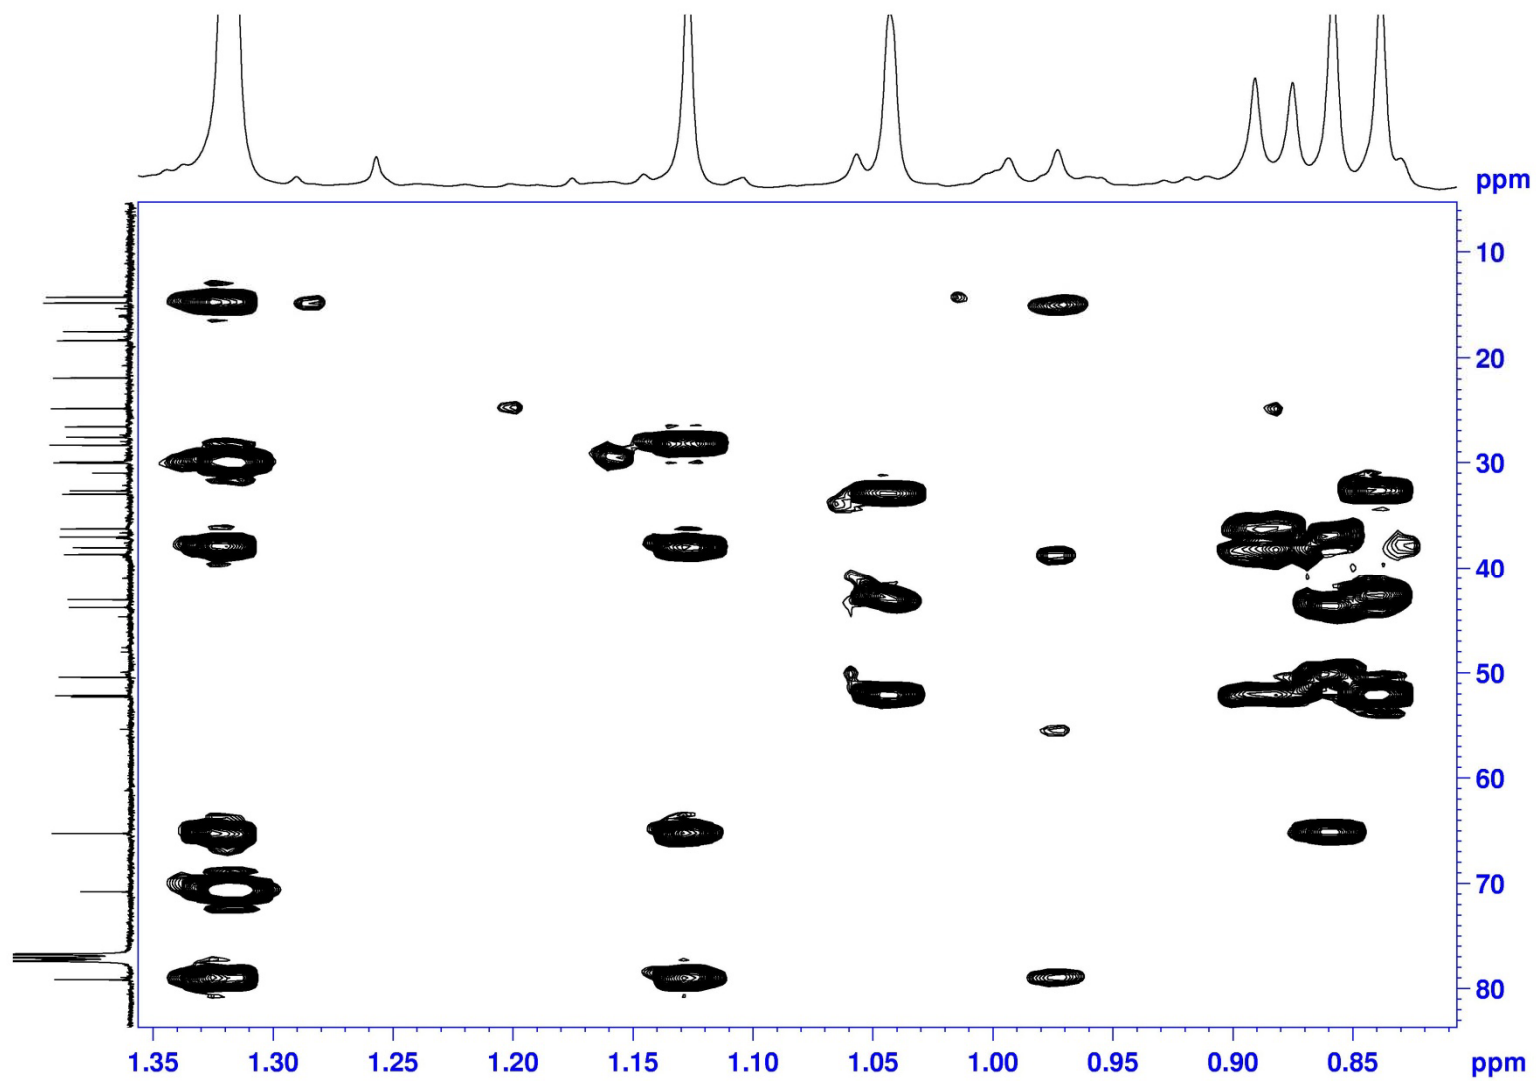

# NOESY (400 MHz) spectrum of compound **8** in CDCl<sub>3</sub>

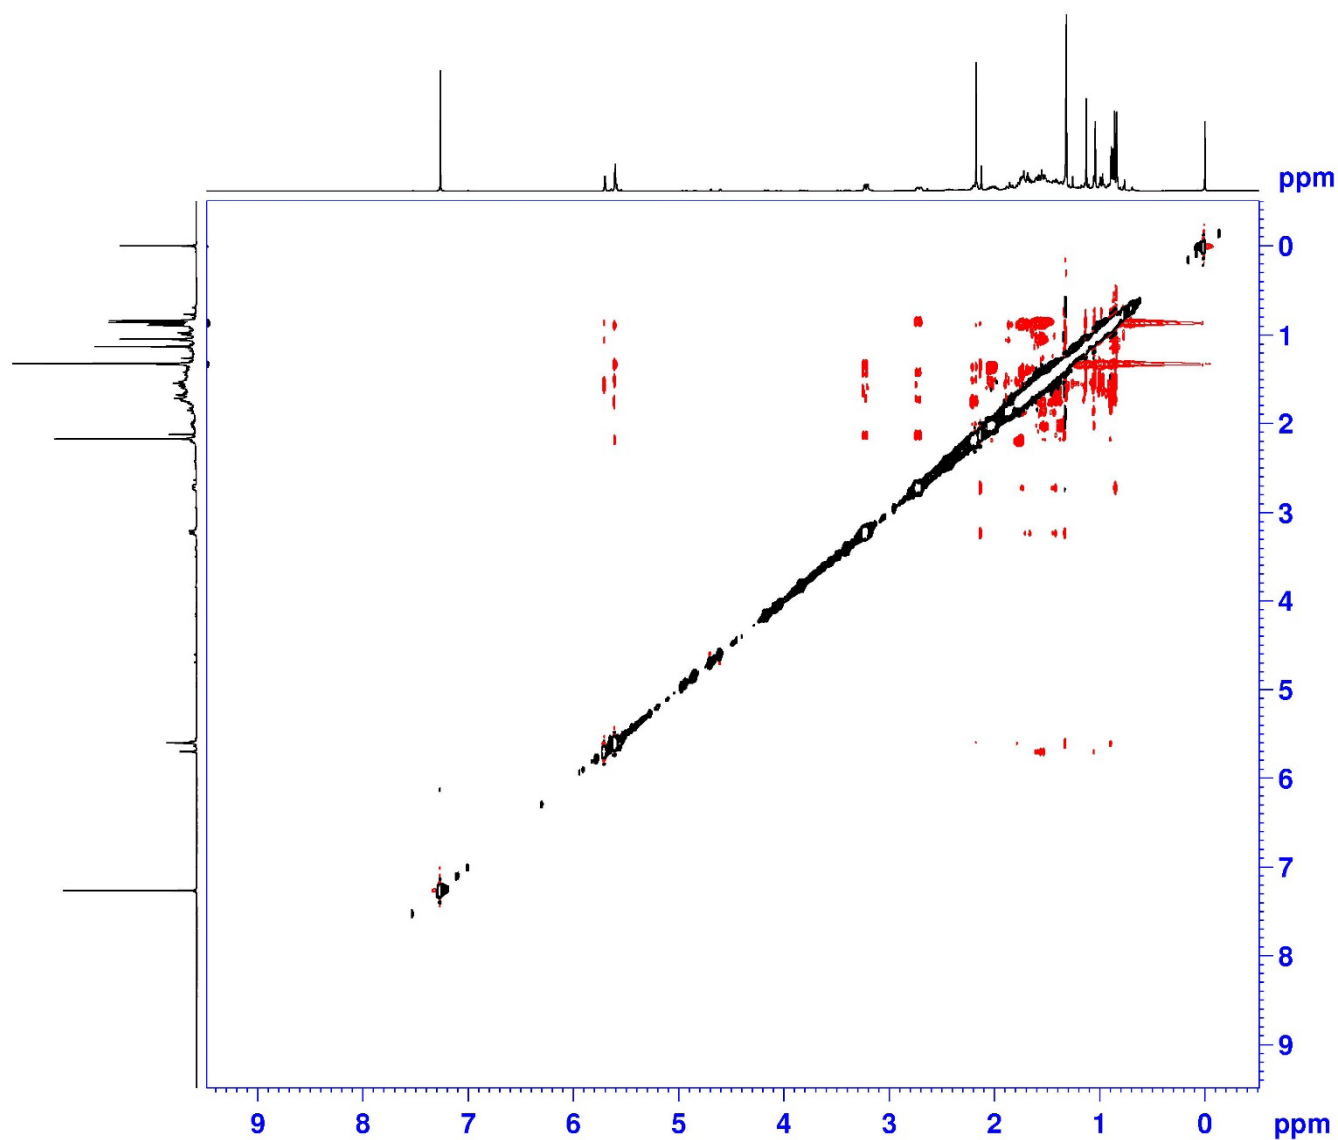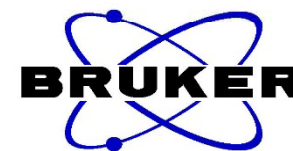

```

NAME          EA3-44-3-1
EXPNO          107
PROCNO         1
Date_          20171127
Time           0.52
INSTRUM        spect
PROBHD         5 mm CPPBBO BB
PULPROG        noesygpphph
TD             2048
SOLVENT        CDCl3
NS             32
DS             32
SWH            4000.000 Hz
FIDRES         1.953125 Hz
AQ             0.2560500 se
RG             208.5
DW             125.000 us
DE             10.00 us
TE             297.0 K
D0             0.00011036 se
D1             1.99385595 se
D8             0.30000001 se
D11            0.03000000 se
D12            0.00002000 se
D16            0.00020000 se
IN0            0.00025000 se
    
```

```

===== CHANNEL f1 =====
SFO1          400.1318006 MF
NUC1           1H
P1             11.50 us
P2             23.00 us
P17            2500.00 us
ND0            1
TD             256
SFO1          400.1318 MF
FIDRES         15.625000 Hz
SW             9.997 PF
FnMODE         States-TPPI
SI             1024
SF            400.1300059 MF
WDW            QSINE
SSB            2
LB             0.00 Hz
GB             0
PC             1.00
SI             1024
MC2            States-TPPI
SF            400.1300055 MF
WDW            QSINE
SSB            2
LR             0.00 Hz
    
```

**S218**



NOESY (400 MHz) spectrum of compound **8** in  $\text{CDCl}_3$

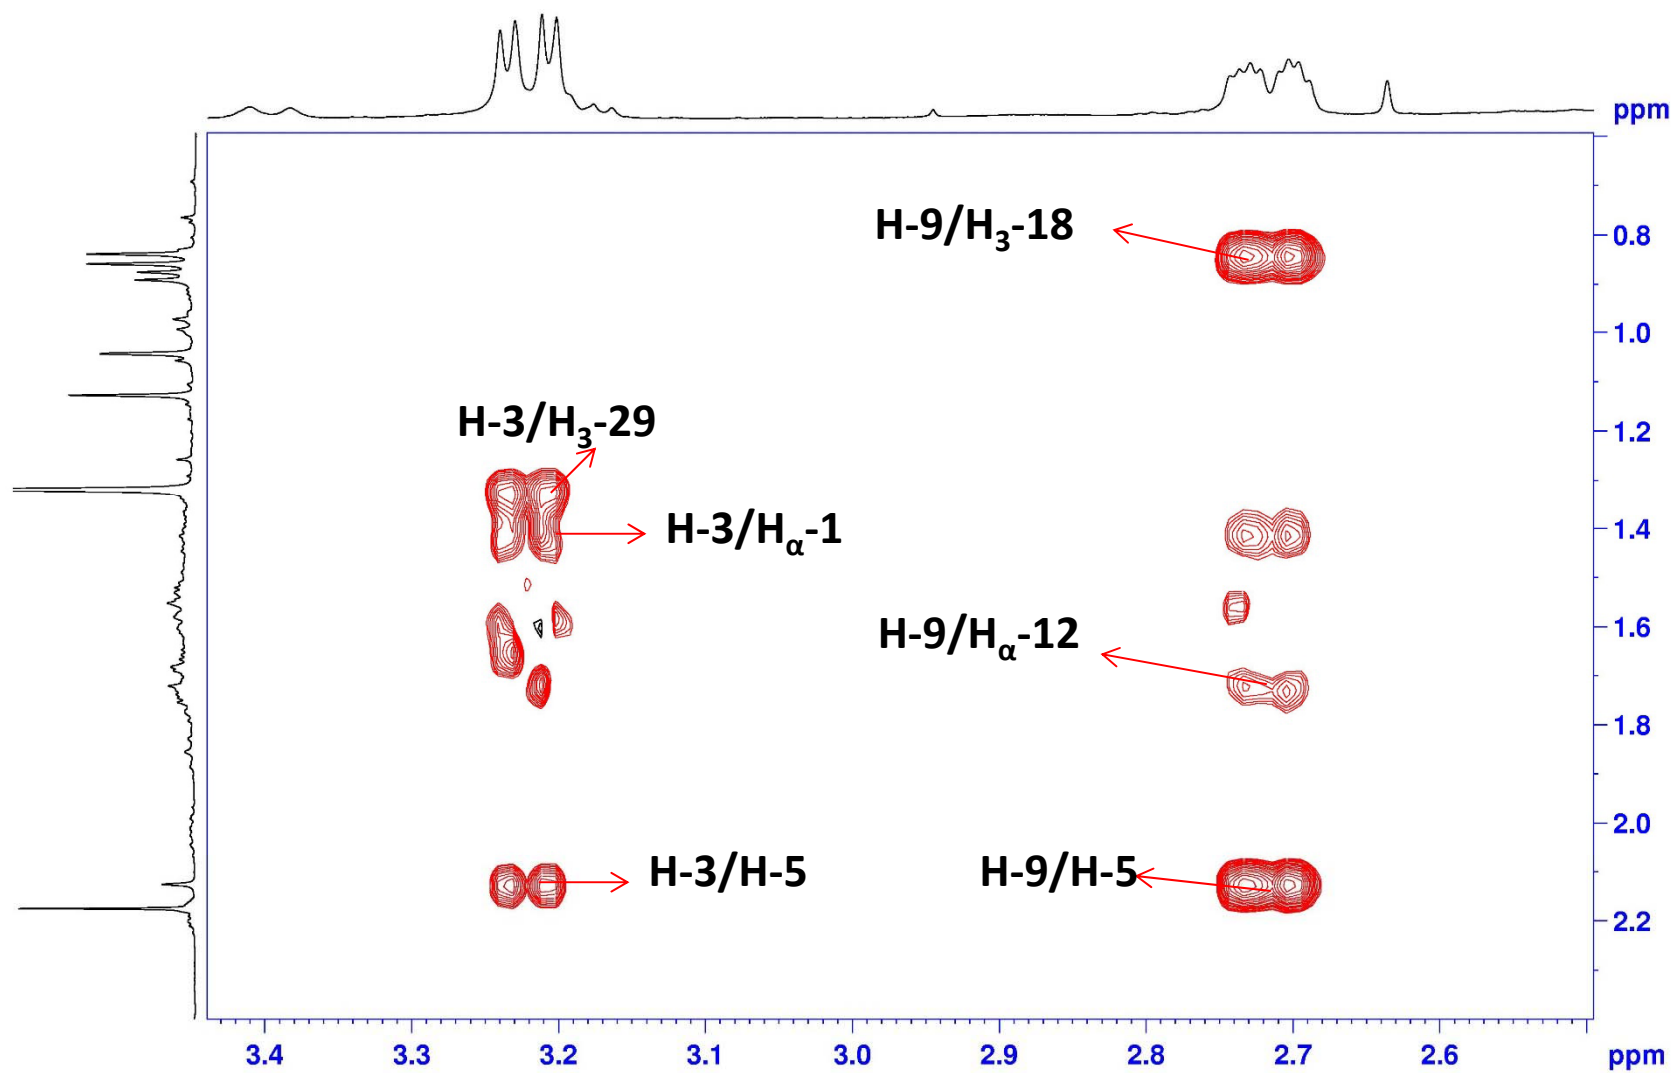

NOESY (400 MHz) spectrum of compound **8** in  $\text{CDCl}_3$

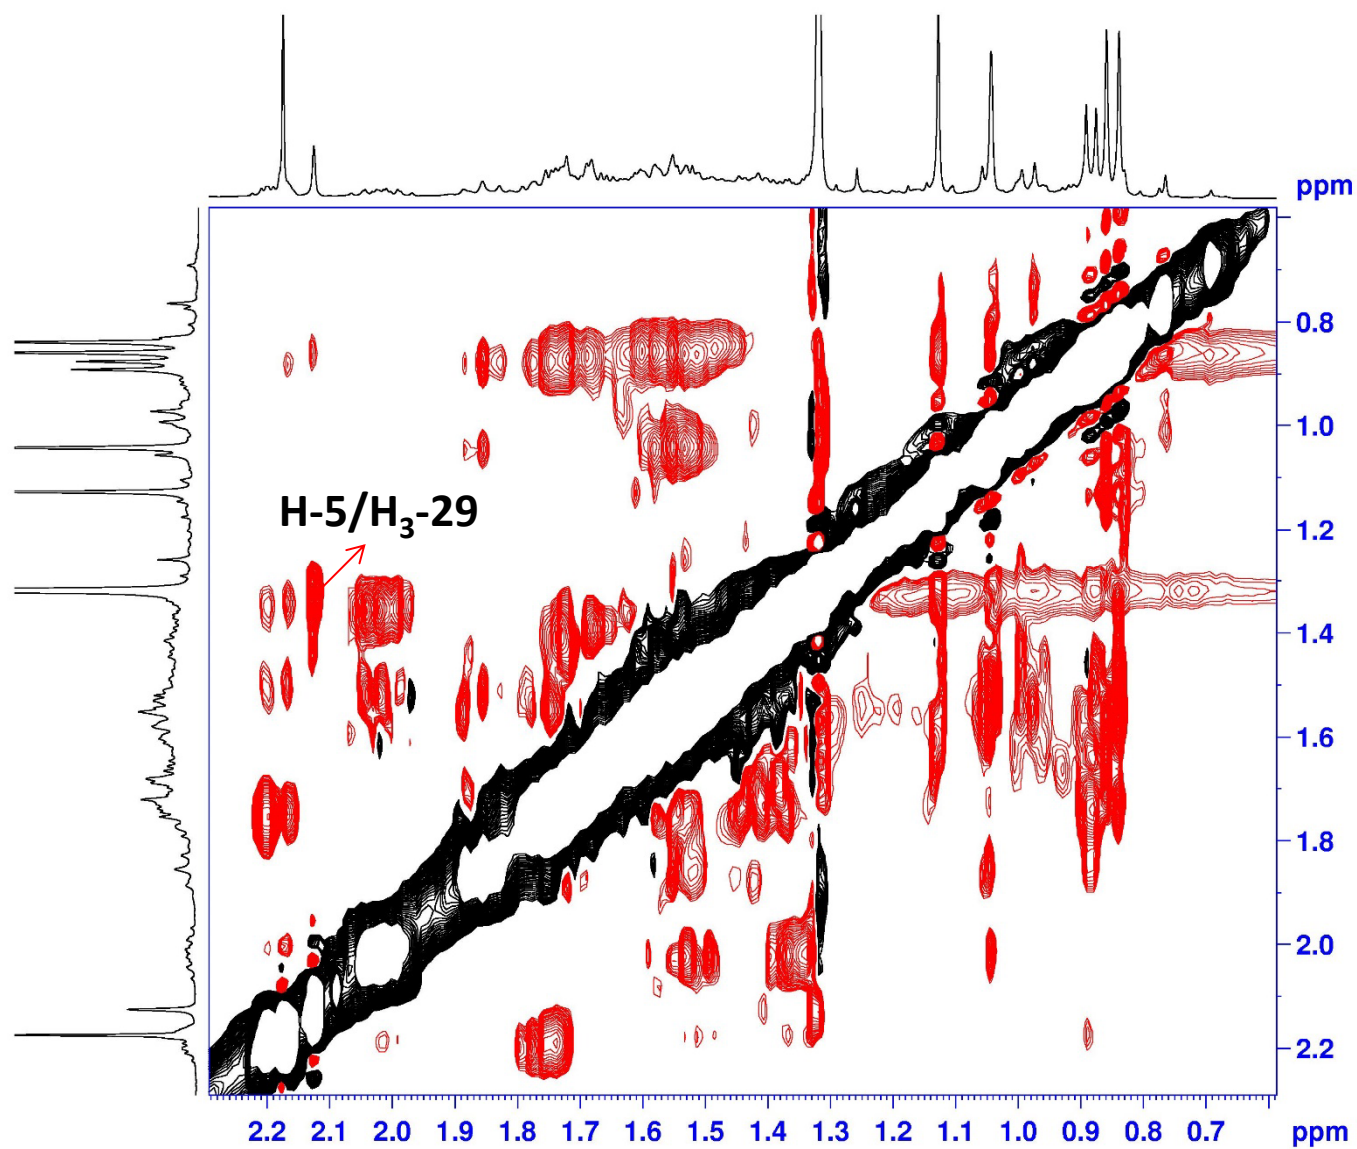

NOESY (400 MHz) spectrum of compound **8** in  $\text{CDCl}_3$

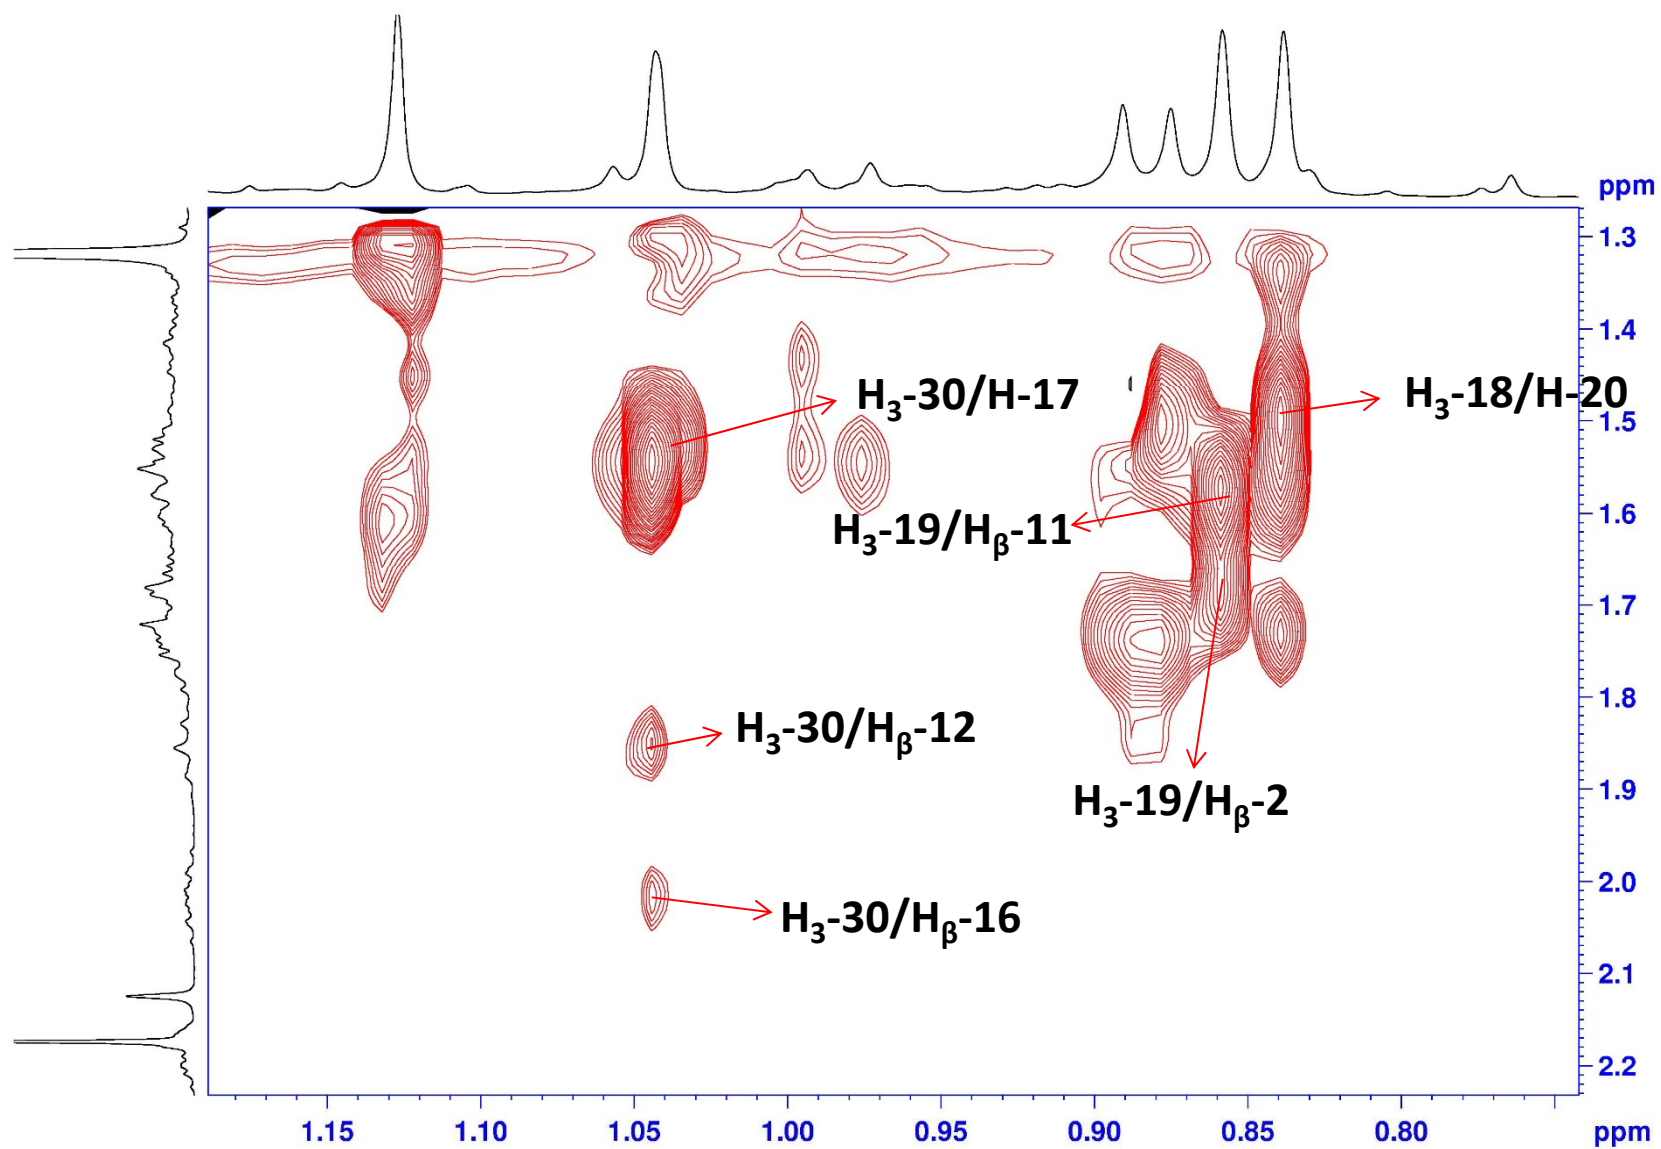

NOESY (400 MHz) spectrum of compound **8** in  $\text{CDCl}_3$

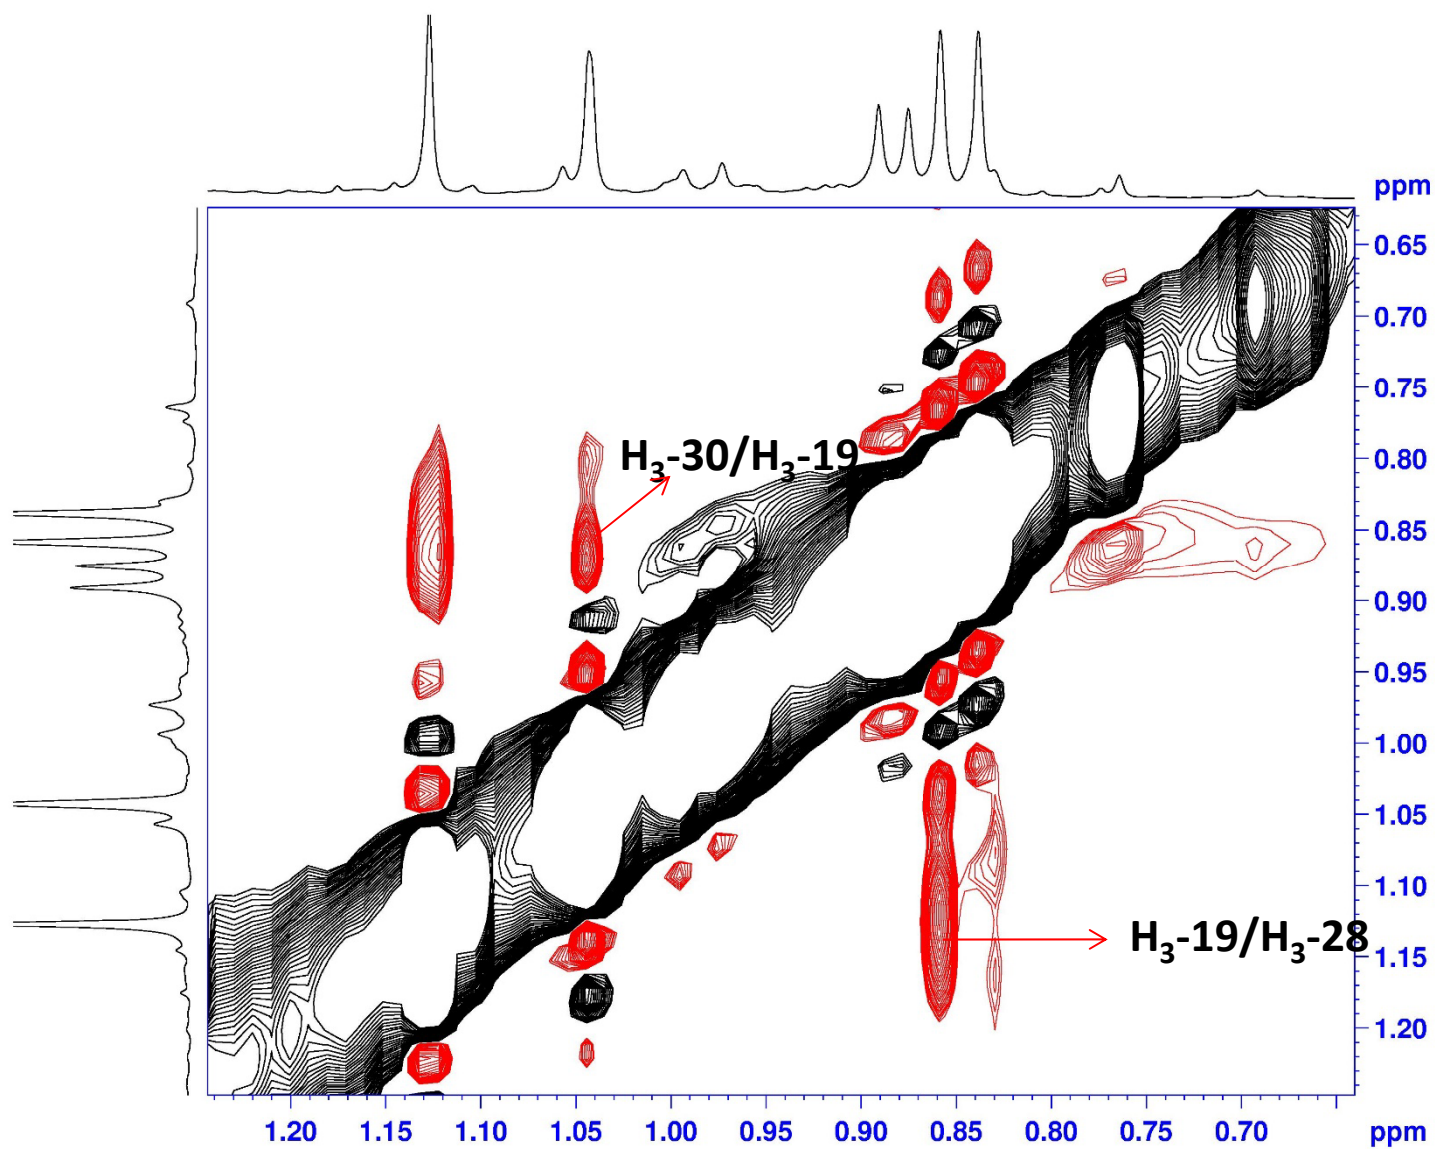

# HR-ESIMS for compound 9

## Generic Display Report

### Analysis Info

Analysis Name D:\Data\MS\data\201708\jiangzhongping\_EA2-27\_neg\_6\_01\_3384.d  
Method LC\_Direct Infusion\_neg\_100-1000mz.m  
Sample Name jiangzhongping\_EA2-27\_neg  
Comment

Acquisition Date 8/21/2017 4:14:53 PM

Operator SCSIO  
Instrument maXis

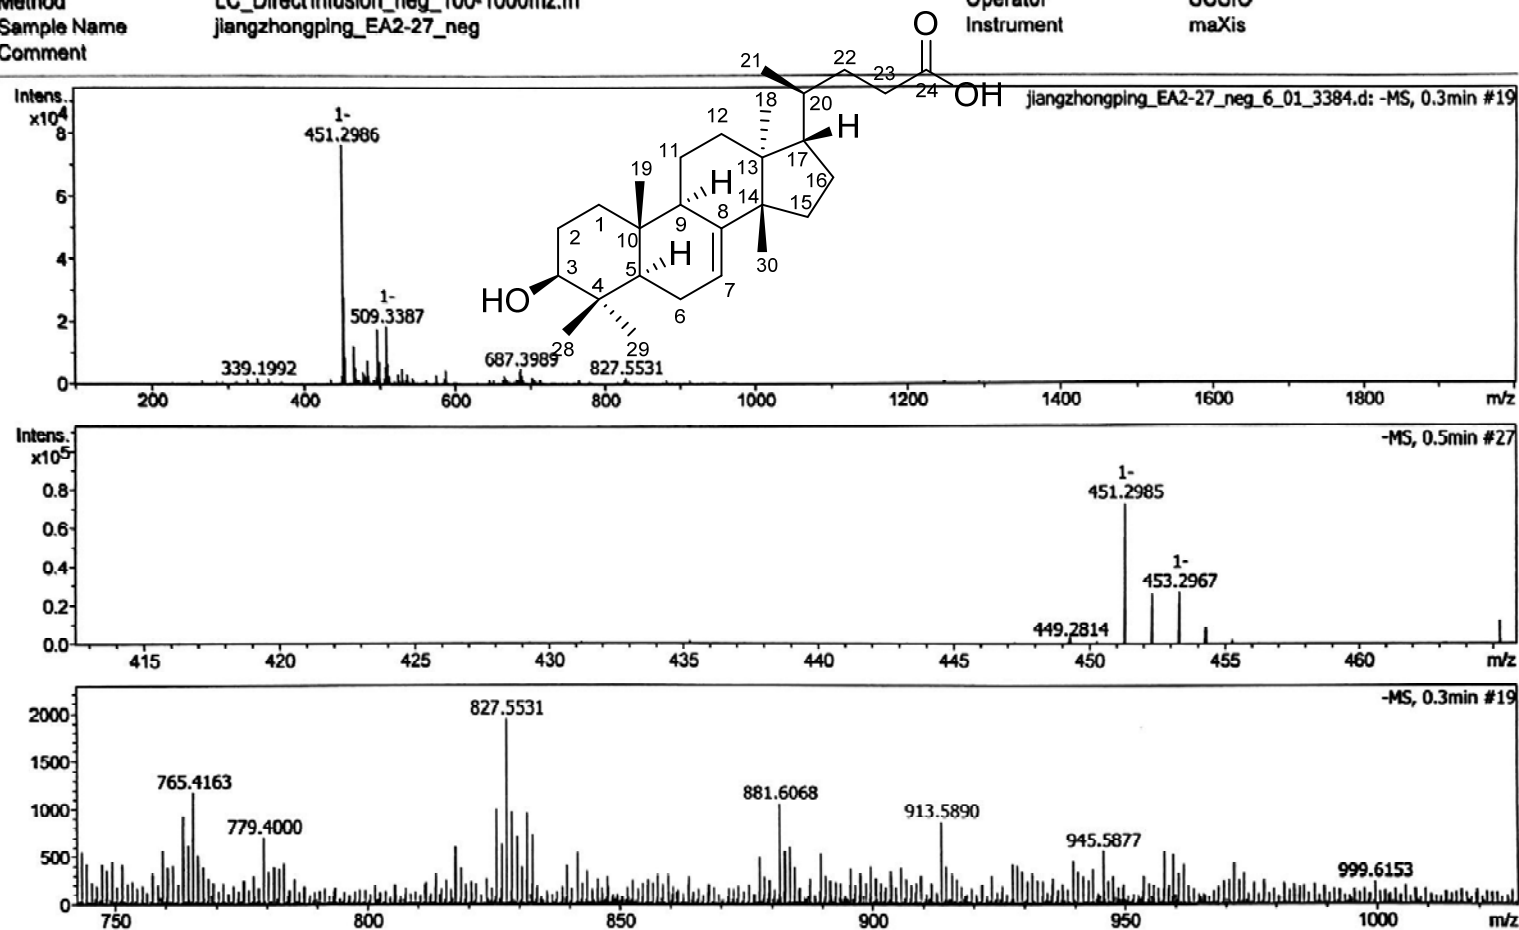

# HR-ESIMS for compound 9

## Mass Spectrum SmartFormula Report

### Analysis Info

Analysis Name D:\Data\MS\data\201708\jiangzhongping\_EA2-27\_neg\_6\_01\_3384.d  
Method LC\_Direct Infusion\_neg\_100-1000mz.m  
Sample Name jiangzhongping\_EA2-27\_neg  
Comment

Acquisition Date 8/21/2017 4:14:53 PM

Operator SCSIO  
Instrument maXis 256552.00029

### Acquisition Parameter

| Source Type | ESI      | Ion Polarity         | Negative | Set Nebulizer    | 0.4 Bar   |
|-------------|----------|----------------------|----------|------------------|-----------|
| Focus       | Active   | Set Capillary        | 4000 V   | Set Dry Heater   | 180 °C    |
| Scan Begin  | 100 m/z  | Set End Plate Offset | -500 V   | Set Dry Gas      | 4.0 l/min |
| Scan End    | 2000 m/z | Set Charging Voltage | 0 V      | Set Divert Valve | Waste     |
|             |          | Set Corona           | 0 nA     | Set APCI Heater  | 0 °C      |

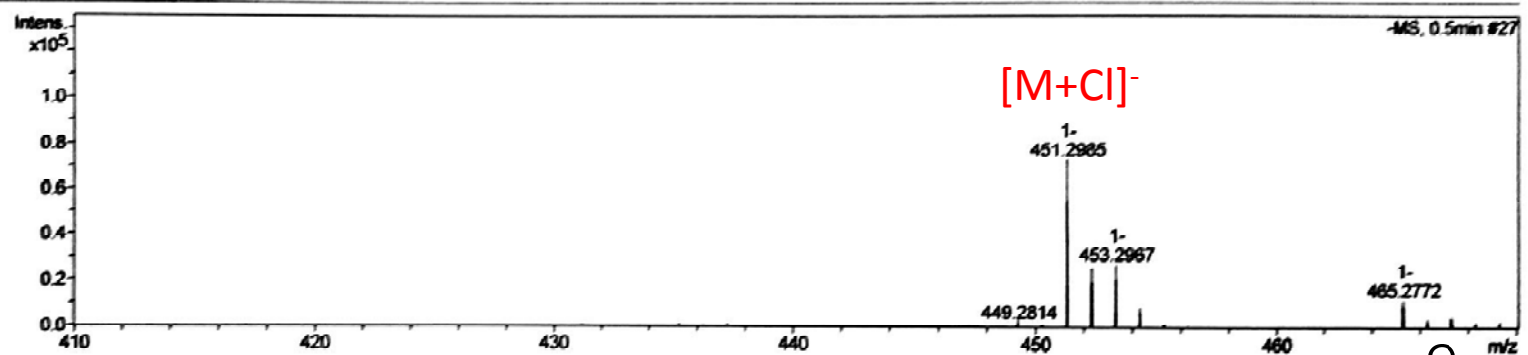

| Meas. m/z  | # | Ion Formula                                      | Score  | m/z        | err [ppm] | err [mDa] | mSigma | rdB | e <sup>-</sup> Conf | N-Rule |
|------------|---|--------------------------------------------------|--------|------------|-----------|-----------|--------|-----|---------------------|--------|
| 451.298467 | 1 | C <sub>27</sub> H <sub>44</sub> ClO <sub>3</sub> | 100.00 | 451.298447 | -0.0      | -0.0      | 25.6   | 5.5 | even                | ok     |

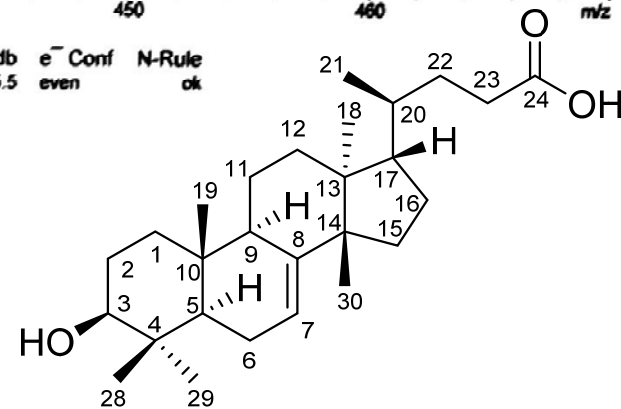

jiangzhongping\_EA2-27\_neg\_6\_01\_3384.d

Bruker Compass DataAnalysis 4.1

printed: 8/21/2017 4:20:24 PM

by: SCSIO

Page 1 of 1



$^1\text{H}$  NMR (400 MHz) spectrum of compound **9** in  $\text{CDCl}_3$

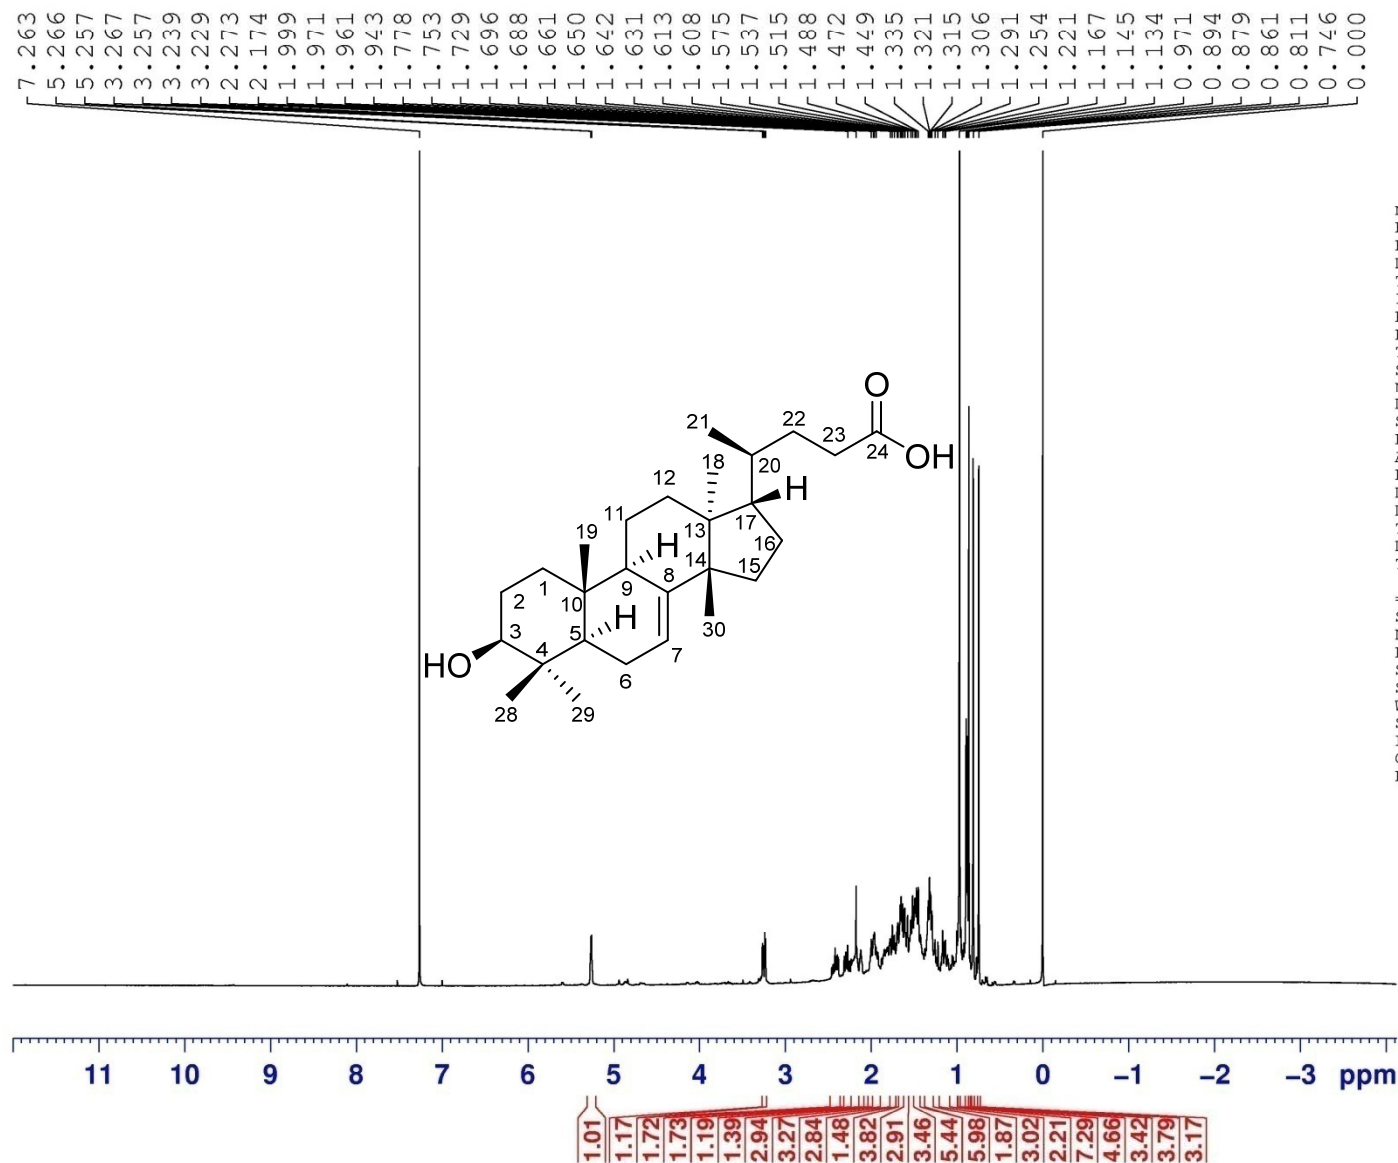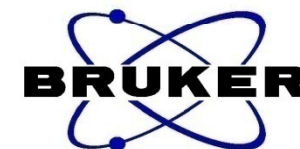

```

NAME      EA2-27 (EA2-33-3)
EXPNO     1
PROCNO    1
Date_     20170613
Time      4.00
INSTRUM   spect
PROBHD    5 mm CPPBBO BB
PULPROG   zg30
TD        65536
SOLVENT   CDCl3
NS        16
DS        2
SWH       8223.685 Hz
FIDRES    0.125483 Hz
AQ        3.9846387 sec
RG        208.5
DW        60.800 usec
DE        10.00 usec
TE        297.0 K
D1        1.00000000 sec
D10       1

===== CHANNEL f1 =====
SF01      400.1324710 MHz
NUC1       1H
P1        11.50 usec
SI        65536
SF        400.1300088 MHz
WDW       EM
SSB       0
LB        0.30 Hz
GB        0
PC        1.00
    
```

$^1\text{H}$  NMR (400 MHz) spectrum of compound **9** in  $\text{CDCl}_3$

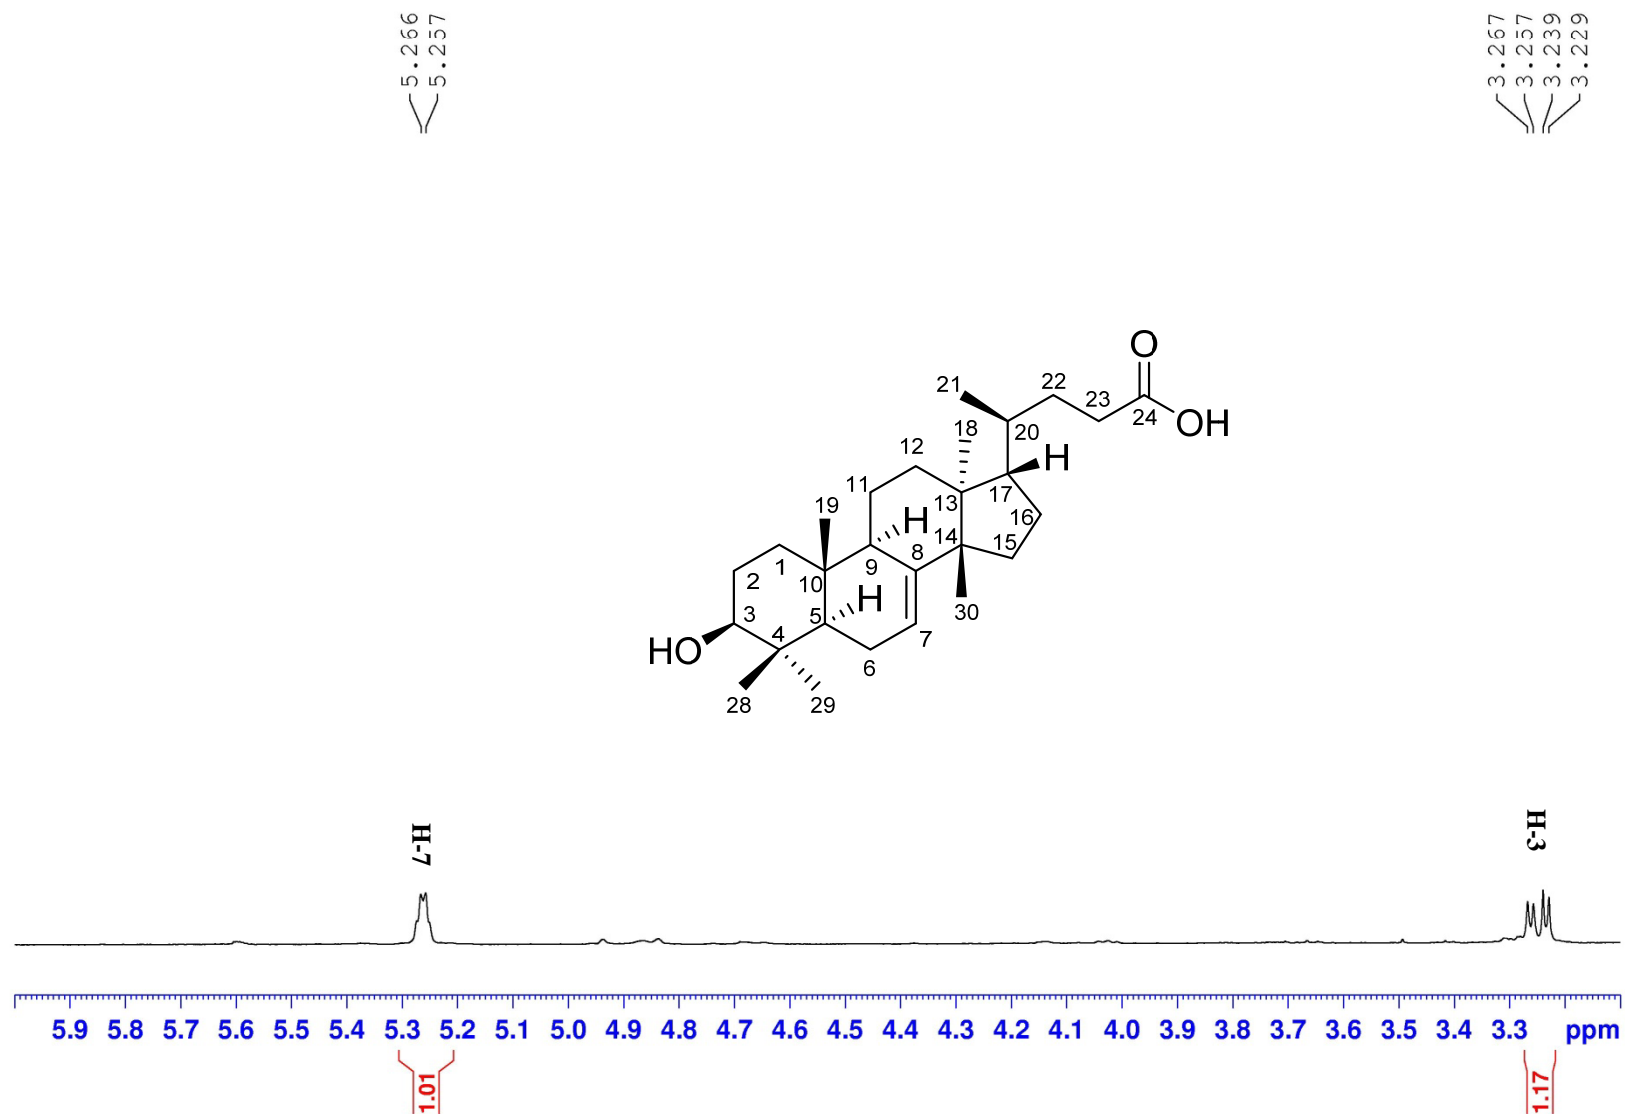



$^1\text{H}$  NMR (400 MHz) spectrum of compound **9** in  $\text{CDCl}_3$

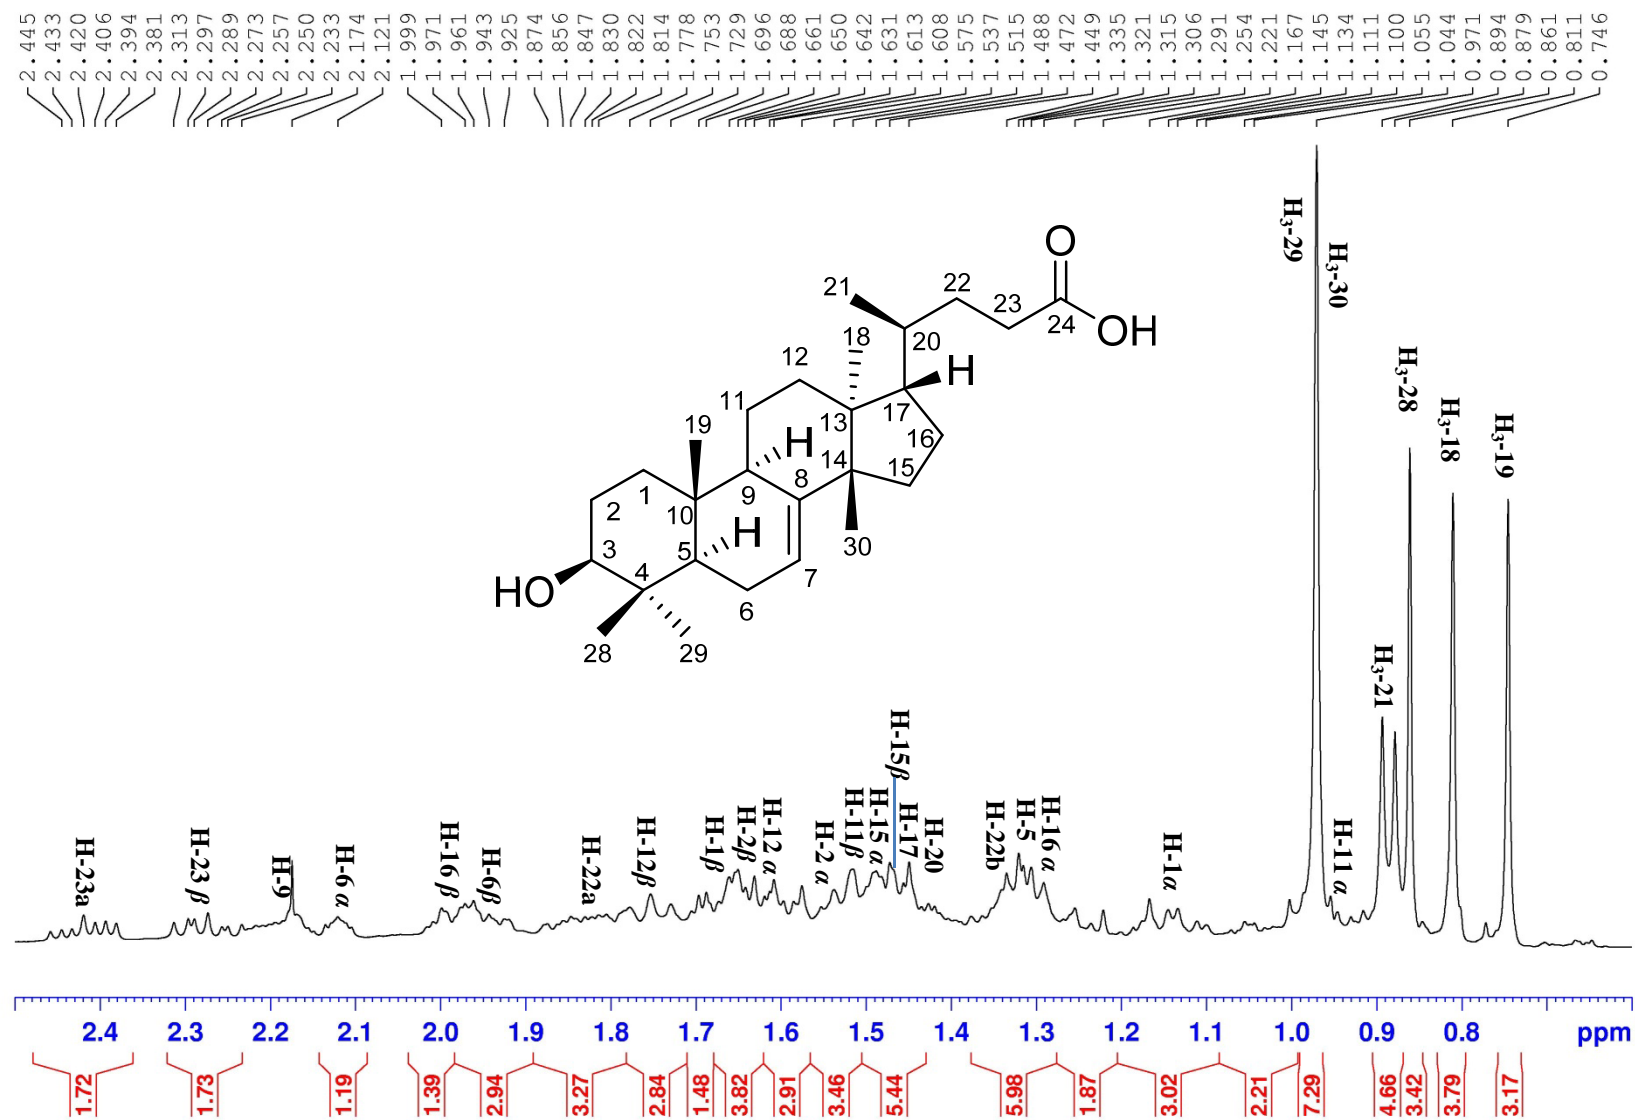

$^{13}\text{C}$  NMR (100 MHz) spectrum of compound **9** in  $\text{CDCl}_3$

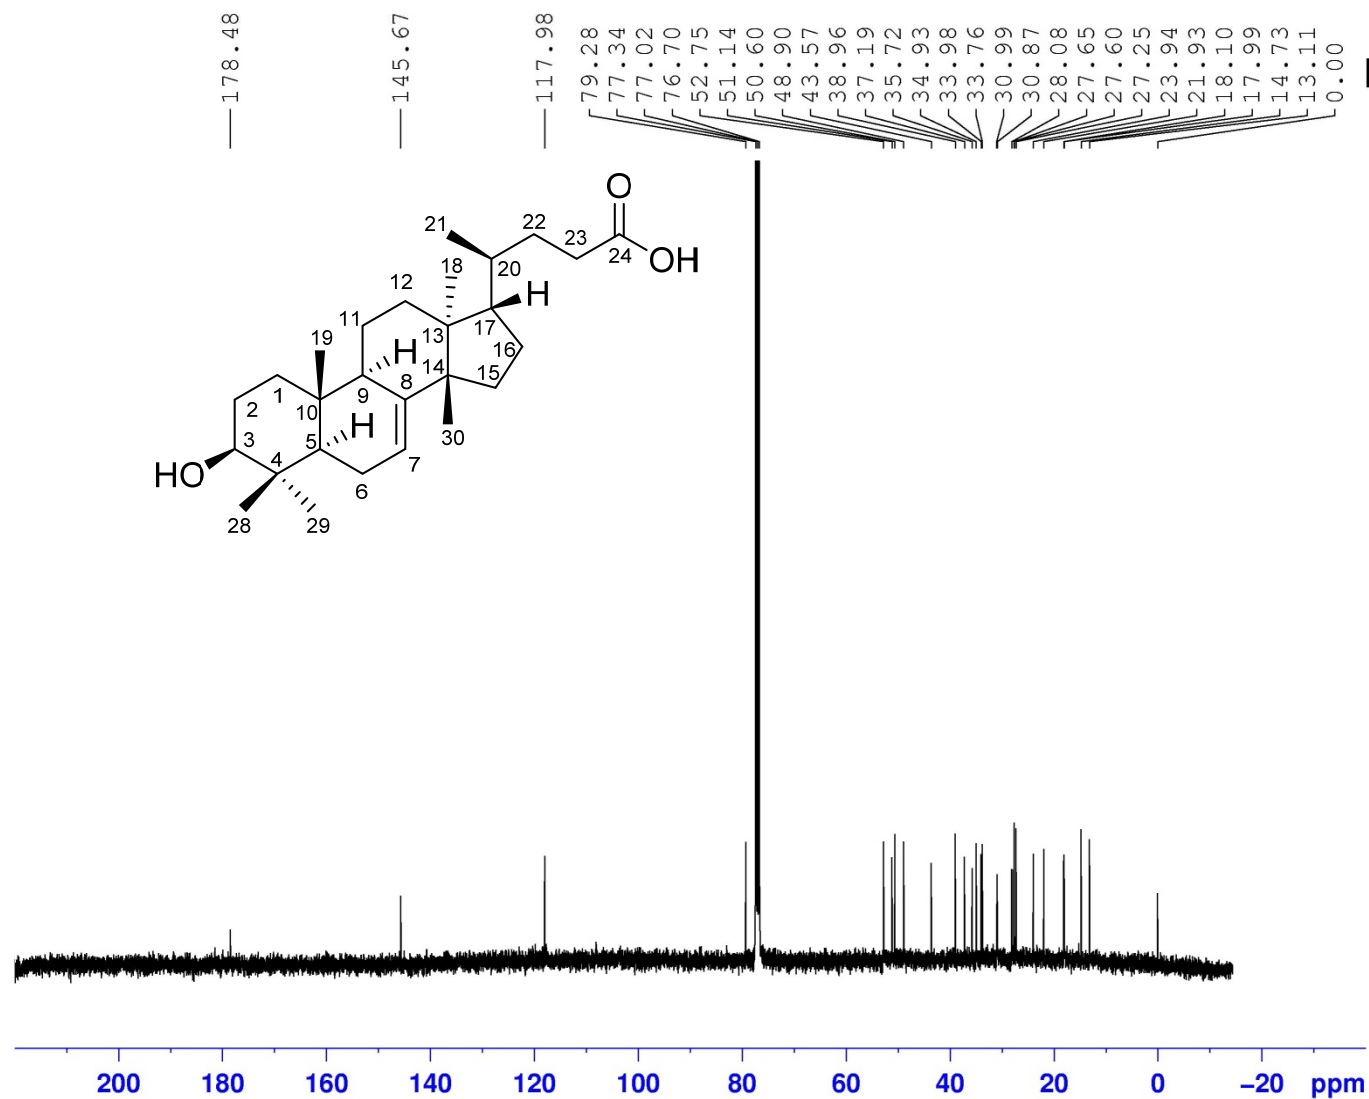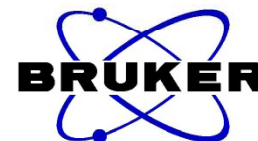

```

NAME      EA2-27 (EA2-33-3)
EXPNO     2
PROCNO    1
Date_     20170613
Time      4.30
INSTRUM   spect
PROBHD    5 mm CPPBBO BB
PULPROG   zgpg30
TD         65536
SOLVENT   CDCl3
NS         500
DS         4
SWH        24038.461 Hz
FIDRES     0.366798 Hz
AQ         1.3631988 sec
RG         85.34
DW         20.800 usec
DE         18.00 usec
TE         297.0 K
D1         2.00000000 sec
D11        0.03000000 sec
TD0        1

===== CHANNEL f1 =====
SFO1      100.6233324 MHz
NUC1      13C
P1        10.00 usec
SI        32768
SF        100.6127690 MHz
WDW        EM
SSB        0
LB         1.00 Hz
GB         0
PC         1.40
    
```

$^{13}\text{C}$  NMR (100 MHz) spectrum of compound **9** in  $\text{CDCl}_3$

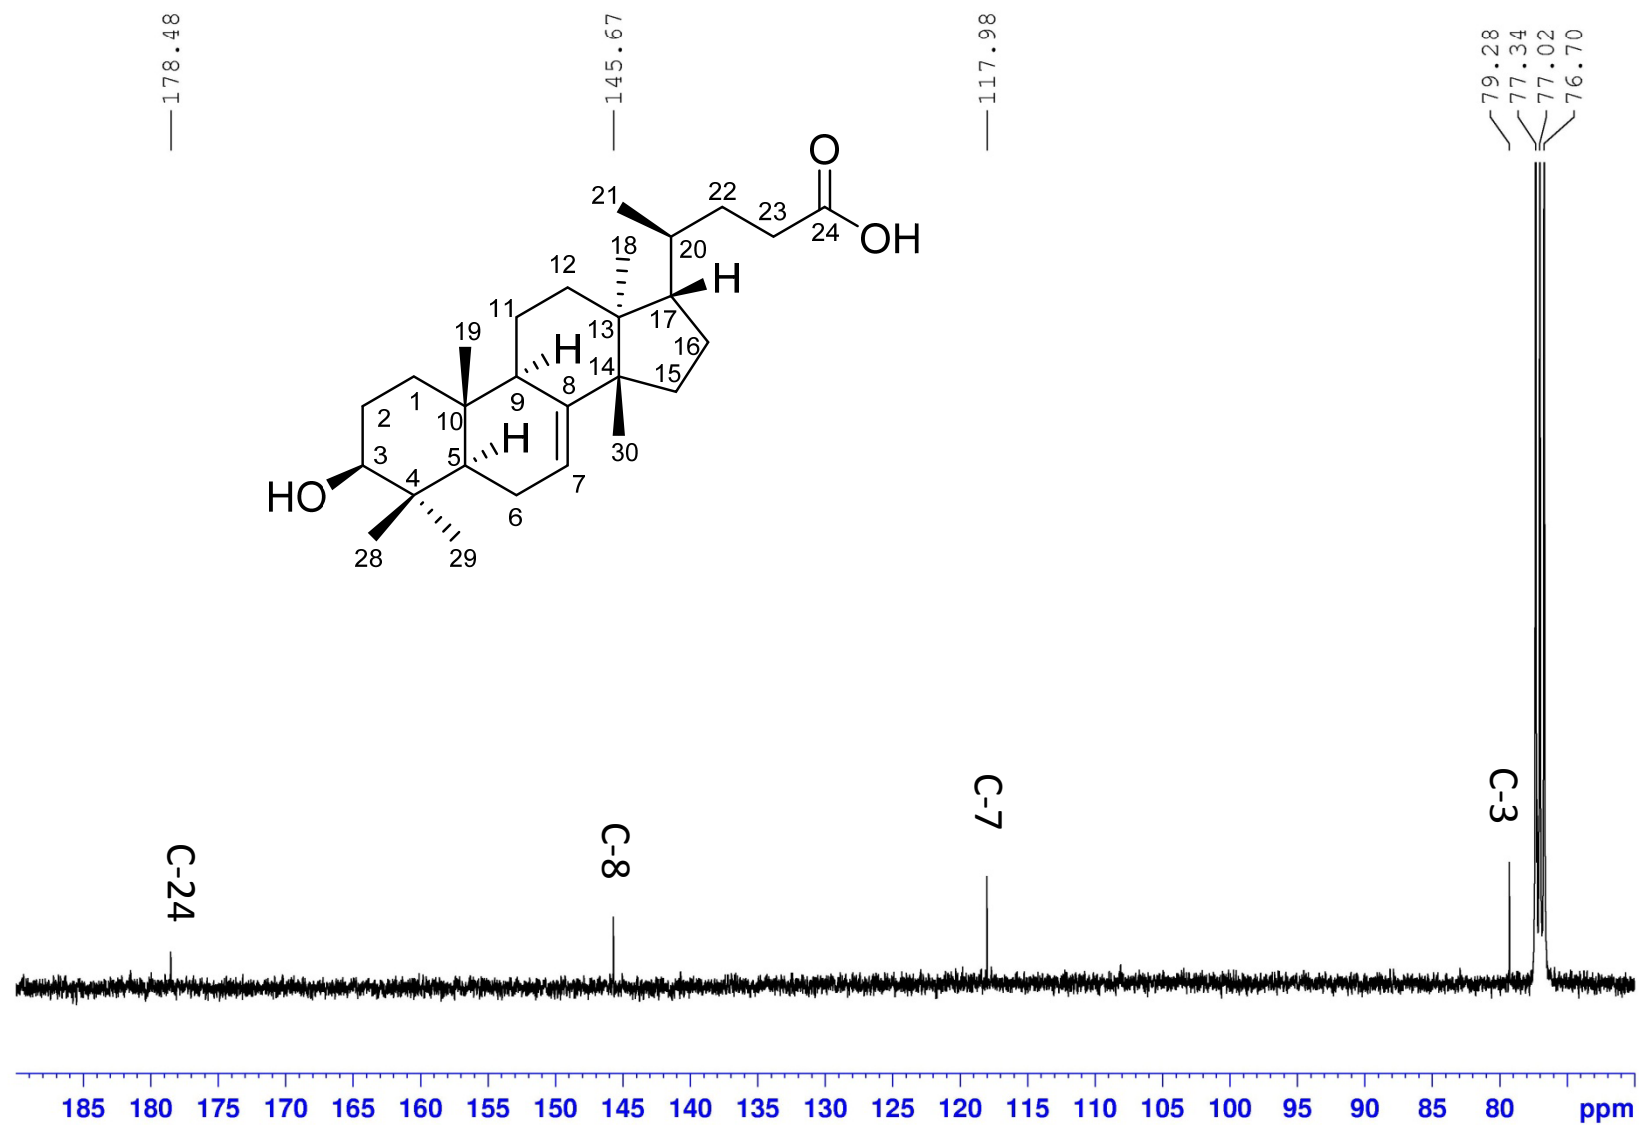

$^{13}\text{C}$  NMR (100 MHz) spectrum of compound **9** in  $\text{CDCl}_3$

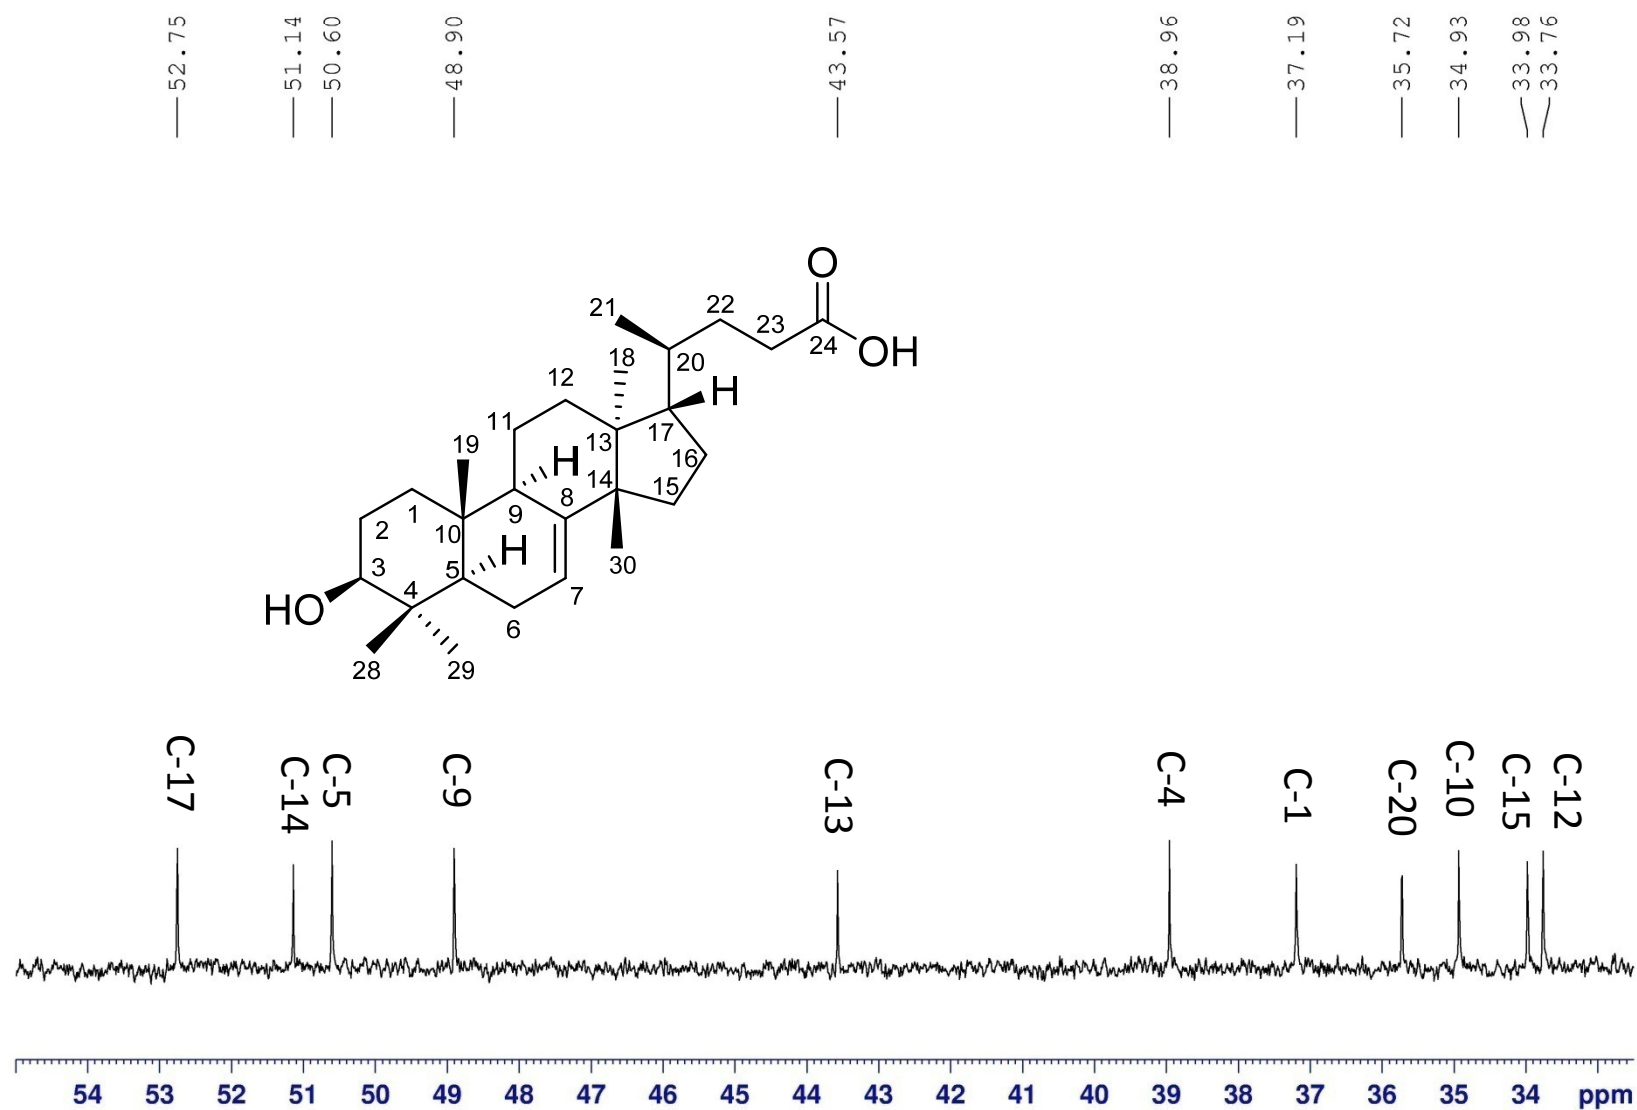

$^{13}\text{C}$  NMR (100 MHz) spectrum of compound **9** in  $\text{CDCl}_3$

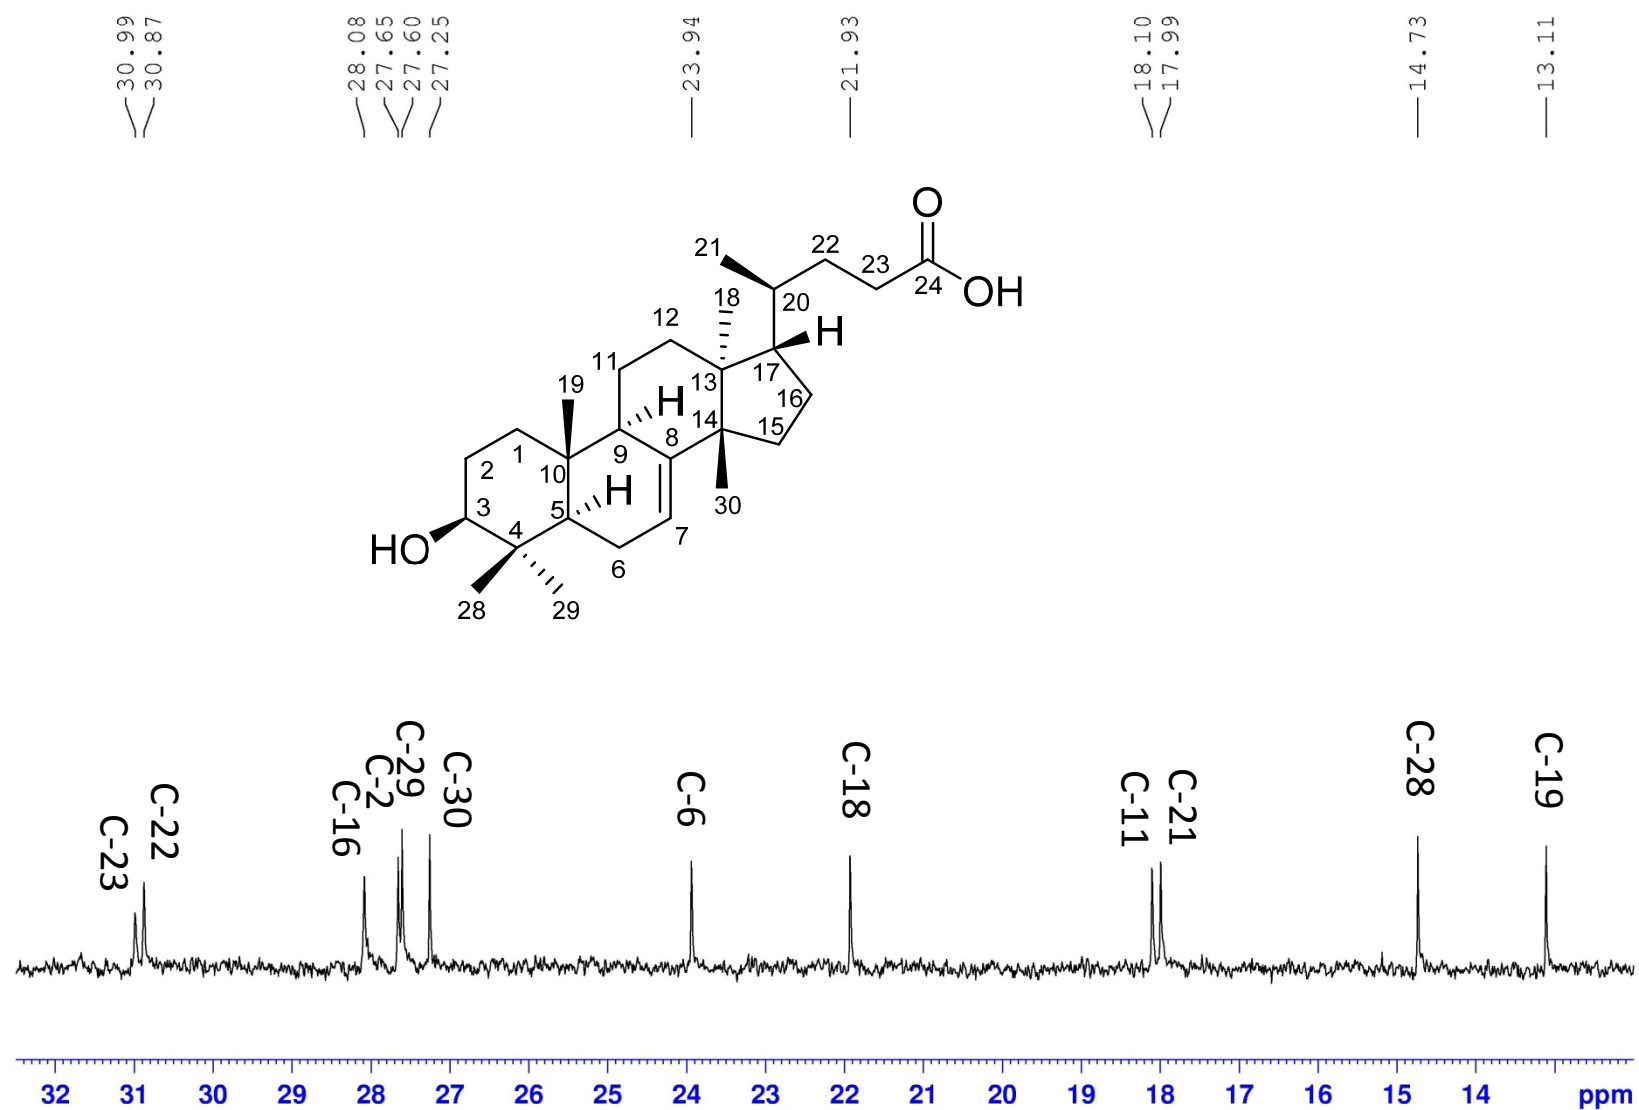

# DEPT135 (100 MHz) spectrum of compound **9** in CDCl<sub>3</sub>

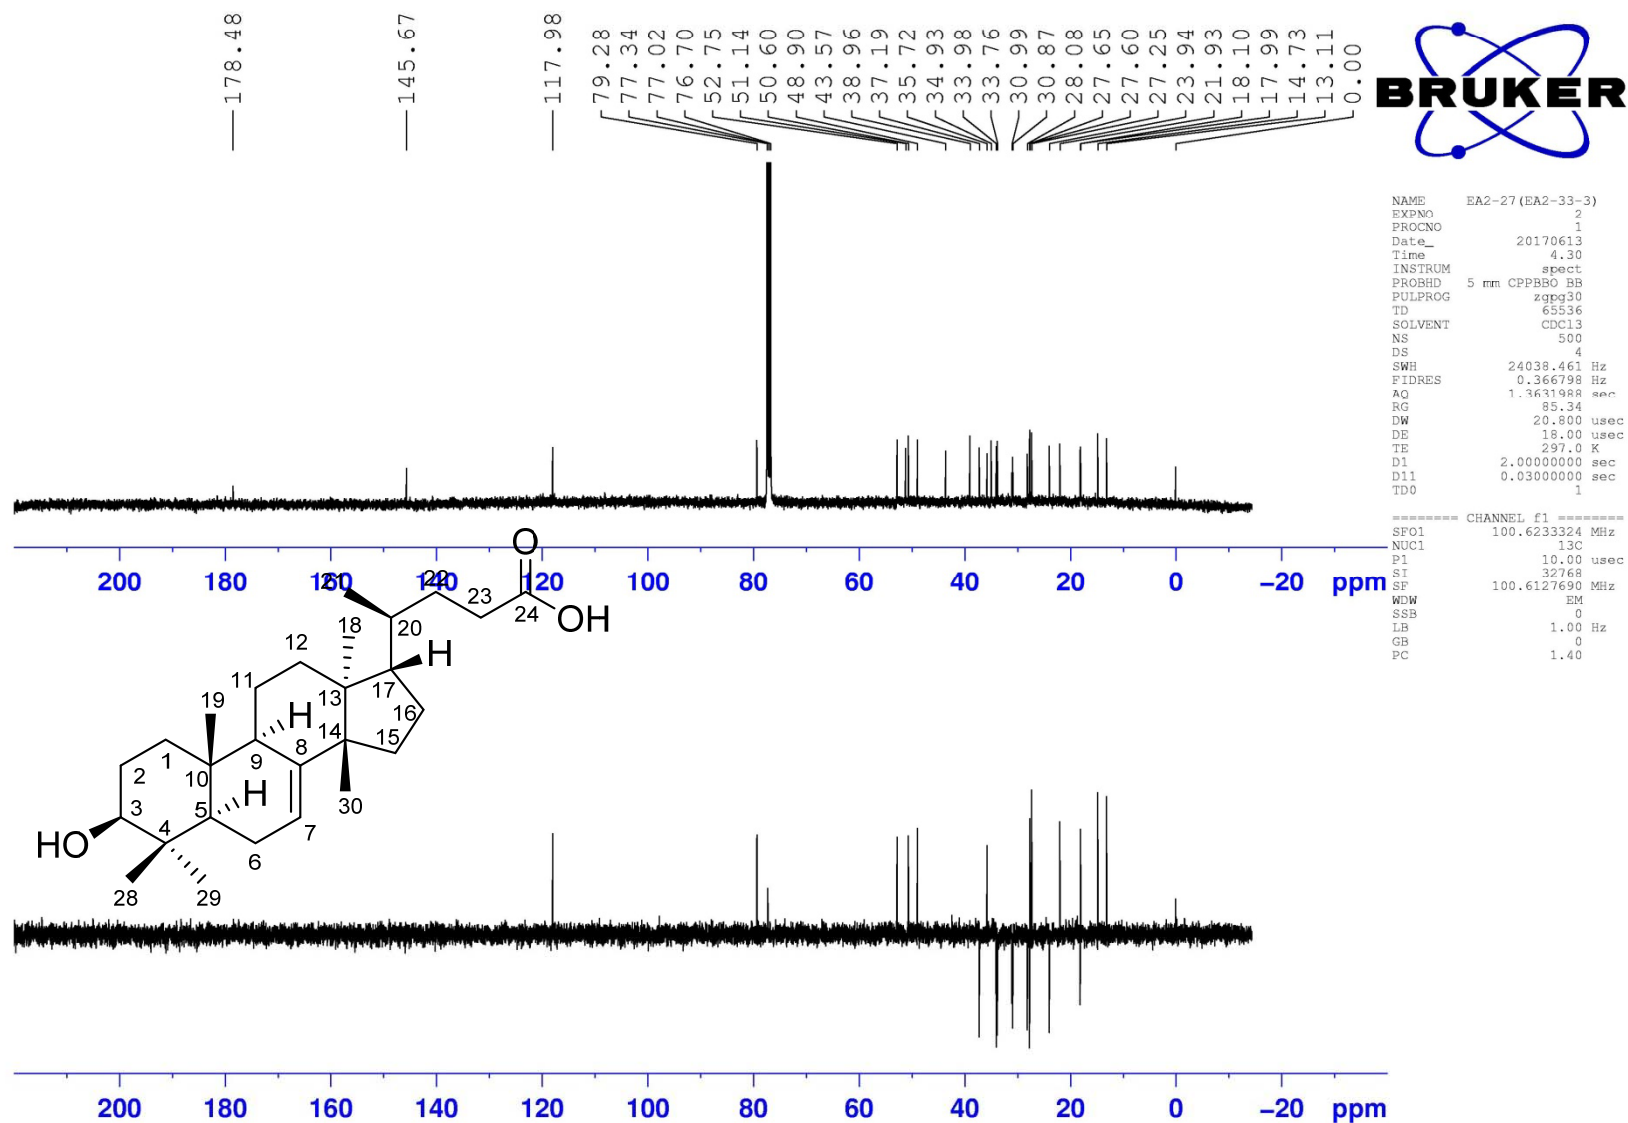

DEPT135 (100 MHz) spectrum of compound **9** in CDCl<sub>3</sub>

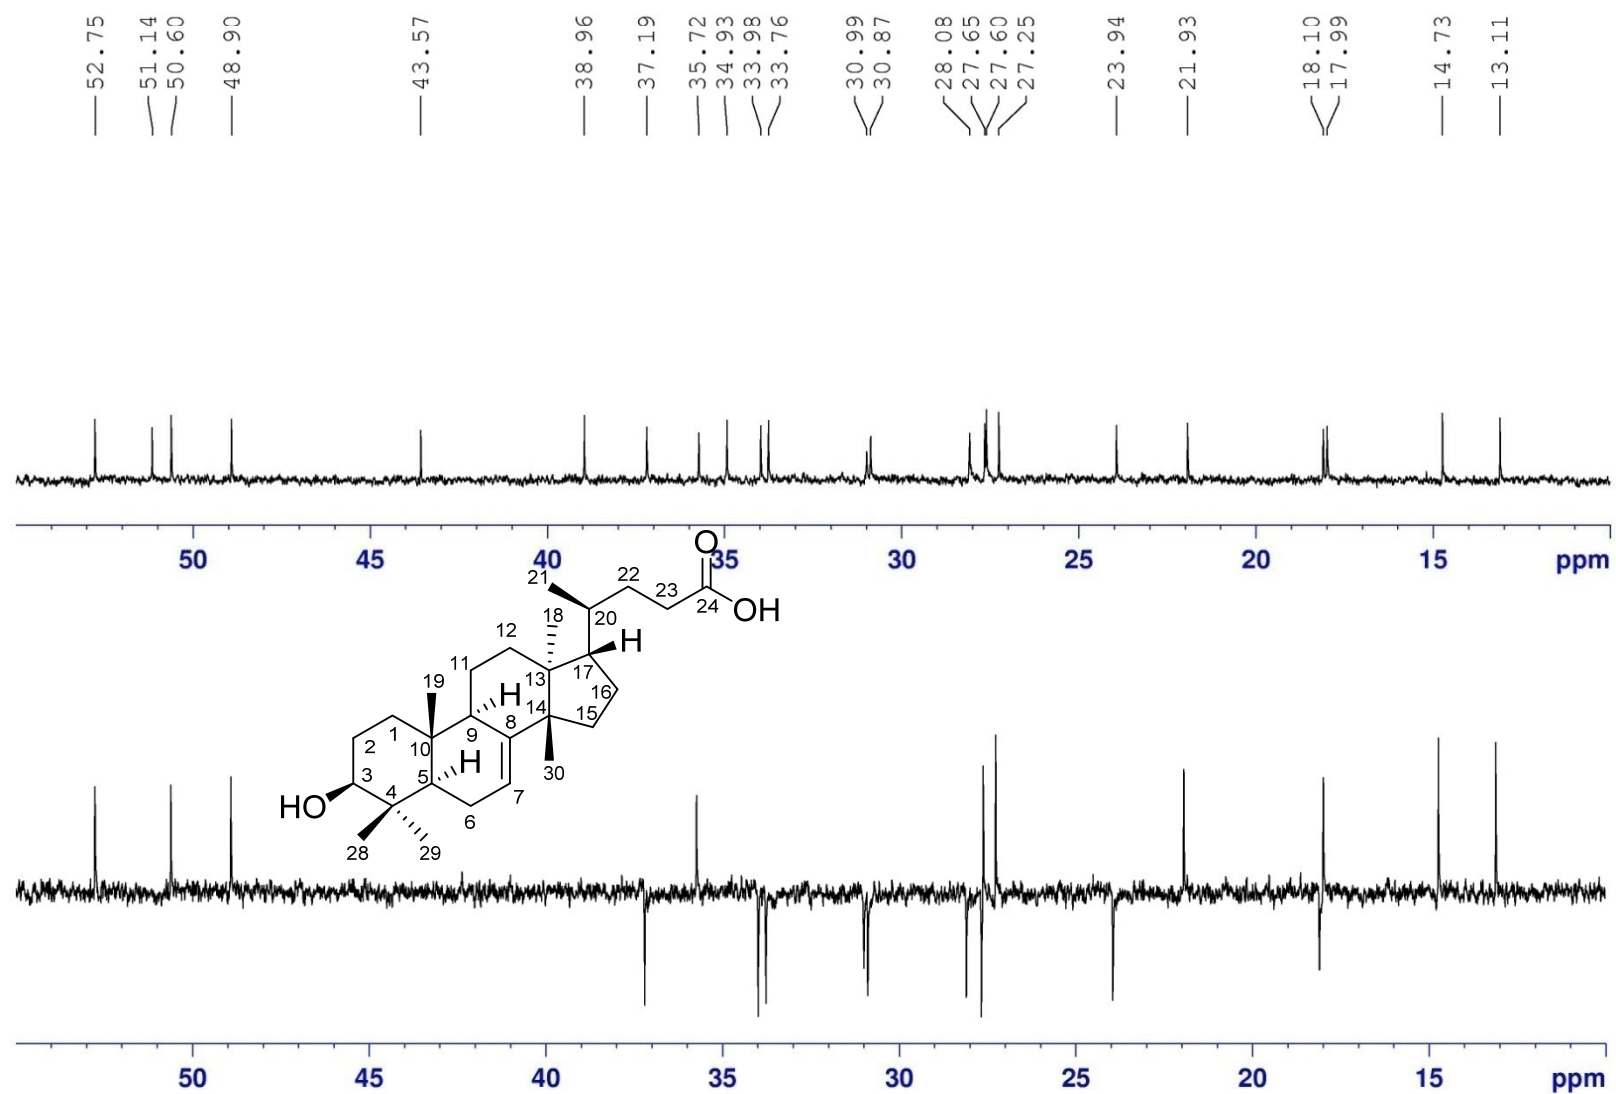

$^1\text{H}$ - $^1\text{H}$  COSY (400 MHz) spectrum of compound **9** in  $\text{CDCl}_3$

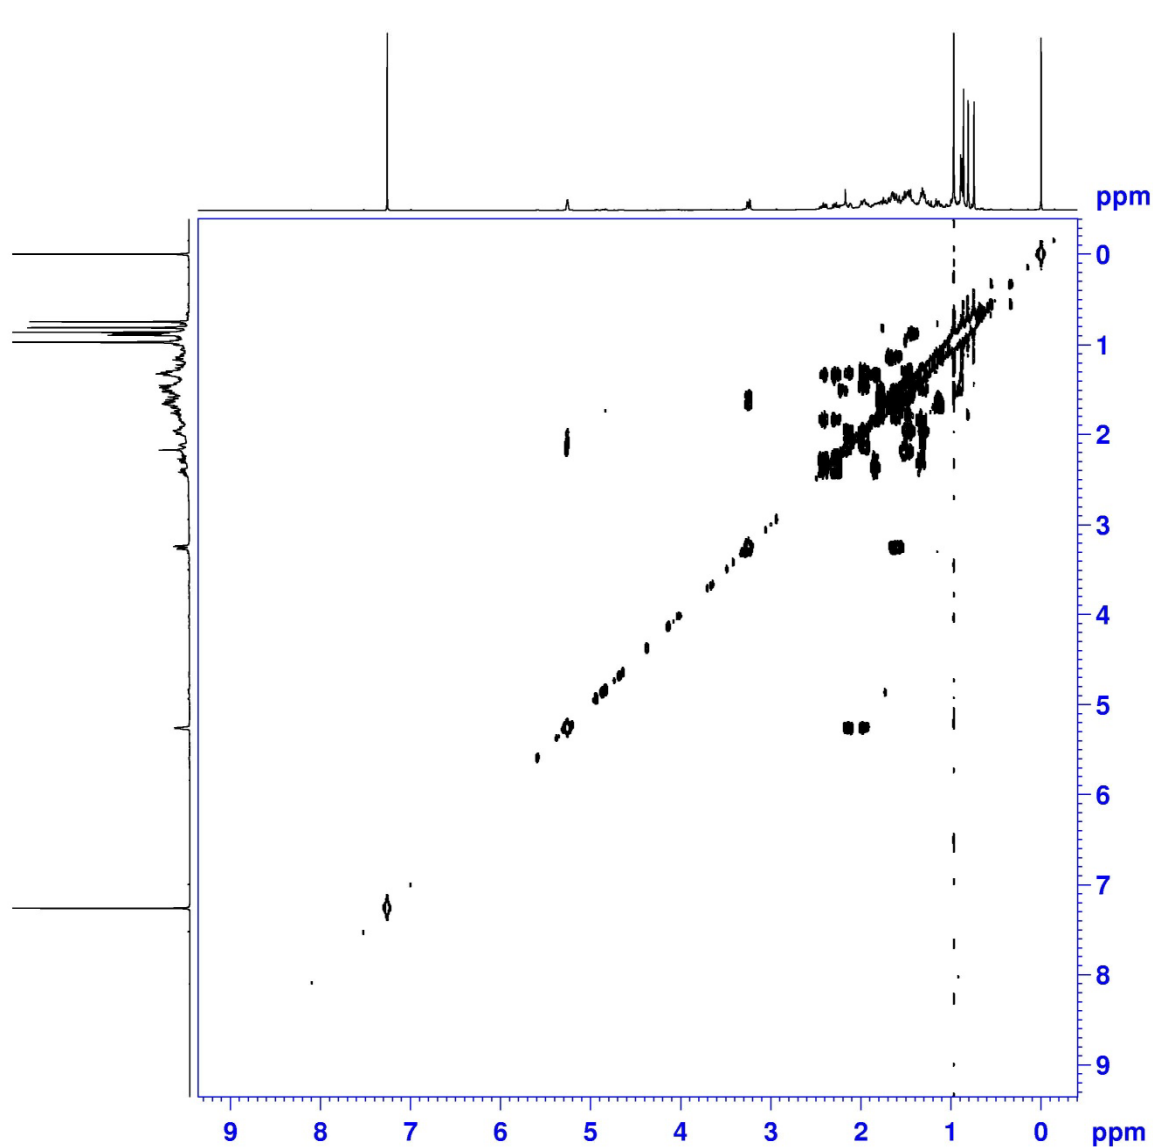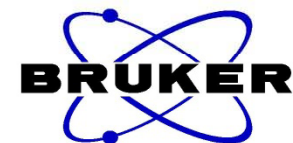

NAME EA2-27 (EA2-33-3)  
EXPNO 103  
PROCNO 1  
Date\_ 20170620  
Time 12.26  
INSTRUM spect  
PROBHD 5 mm CPPBBO BB  
PULPROG cosygpppgf  
TD 2048  
SOLVENT  $\text{CDCl}_3$   
NS 8  
DS 8  
SWH 3906.250 Hz  
FIDRES 1.907349 Hz  
AQ 0.2621940 sec  
RG 208.5  
DW 128.000 usec  
DE 10.00 usec  
TE 297.0 K  
D0 0.00000300 sec  
D1 1.89678097 sec  
D11 0.03000000 sec  
D12 0.00002000 sec  
D13 0.00000400 sec  
D16 0.00020000 sec  
IN0 0.00025600 sec

===== CHANNEL f1 =====  
SFO1 400.1318006 MHz  
NUC1  $^1\text{H}$   
P0 11.50 usec  
P1 11.50 usec  
P17 2500.00 usec  
ND0 1  
TD 128  
SFO1 400.1318 MHz  
FIDRES 30.517578 Hz  
SW 9.762 ppm  
FnMODE QF  
SI 1024  
SF 400.1300098 MHz  
WDW QSINE  
SSB 0  
LB 0.00 Hz  
GB 0  
PC 1.40  
SI 1024  
MC2 QF  
SF 400.1300098 MHz  
WDW QSINE  
SSB 0  
LB 0.00 Hz  
GB 0



$^1\text{H}$ - $^1\text{H}$  COSY (400 MHz) spectrum of compound **9** in  $\text{CDCl}_3$

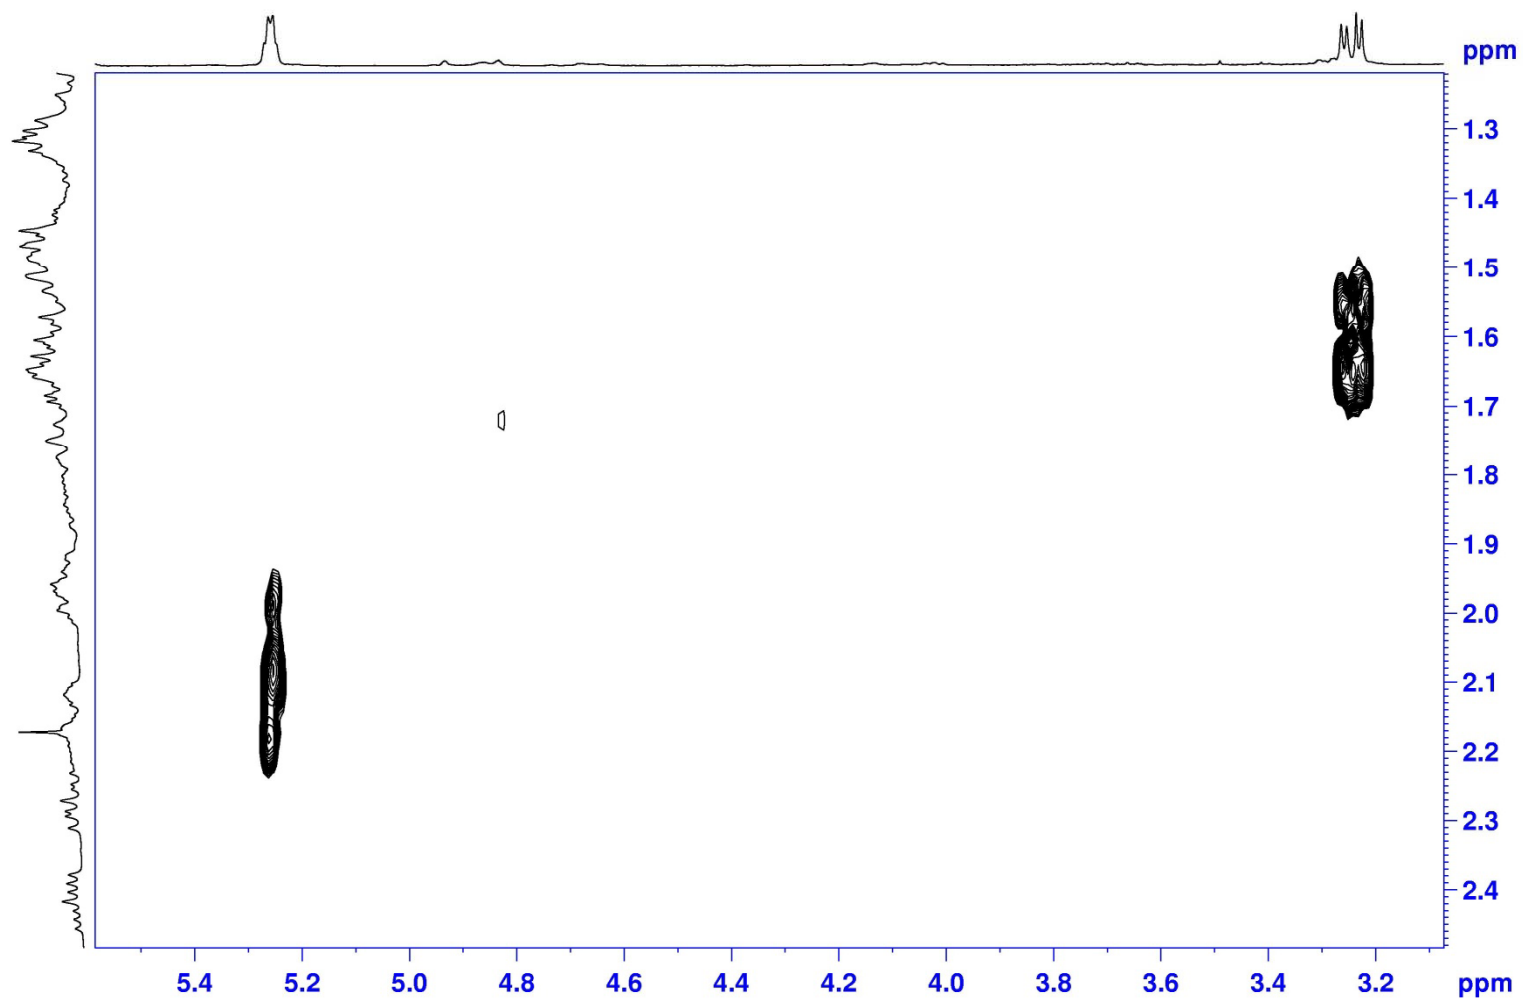

$^1\text{H}$ - $^1\text{H}$  COSY (400 MHz) spectrum of compound **9** in  $\text{CDCl}_3$

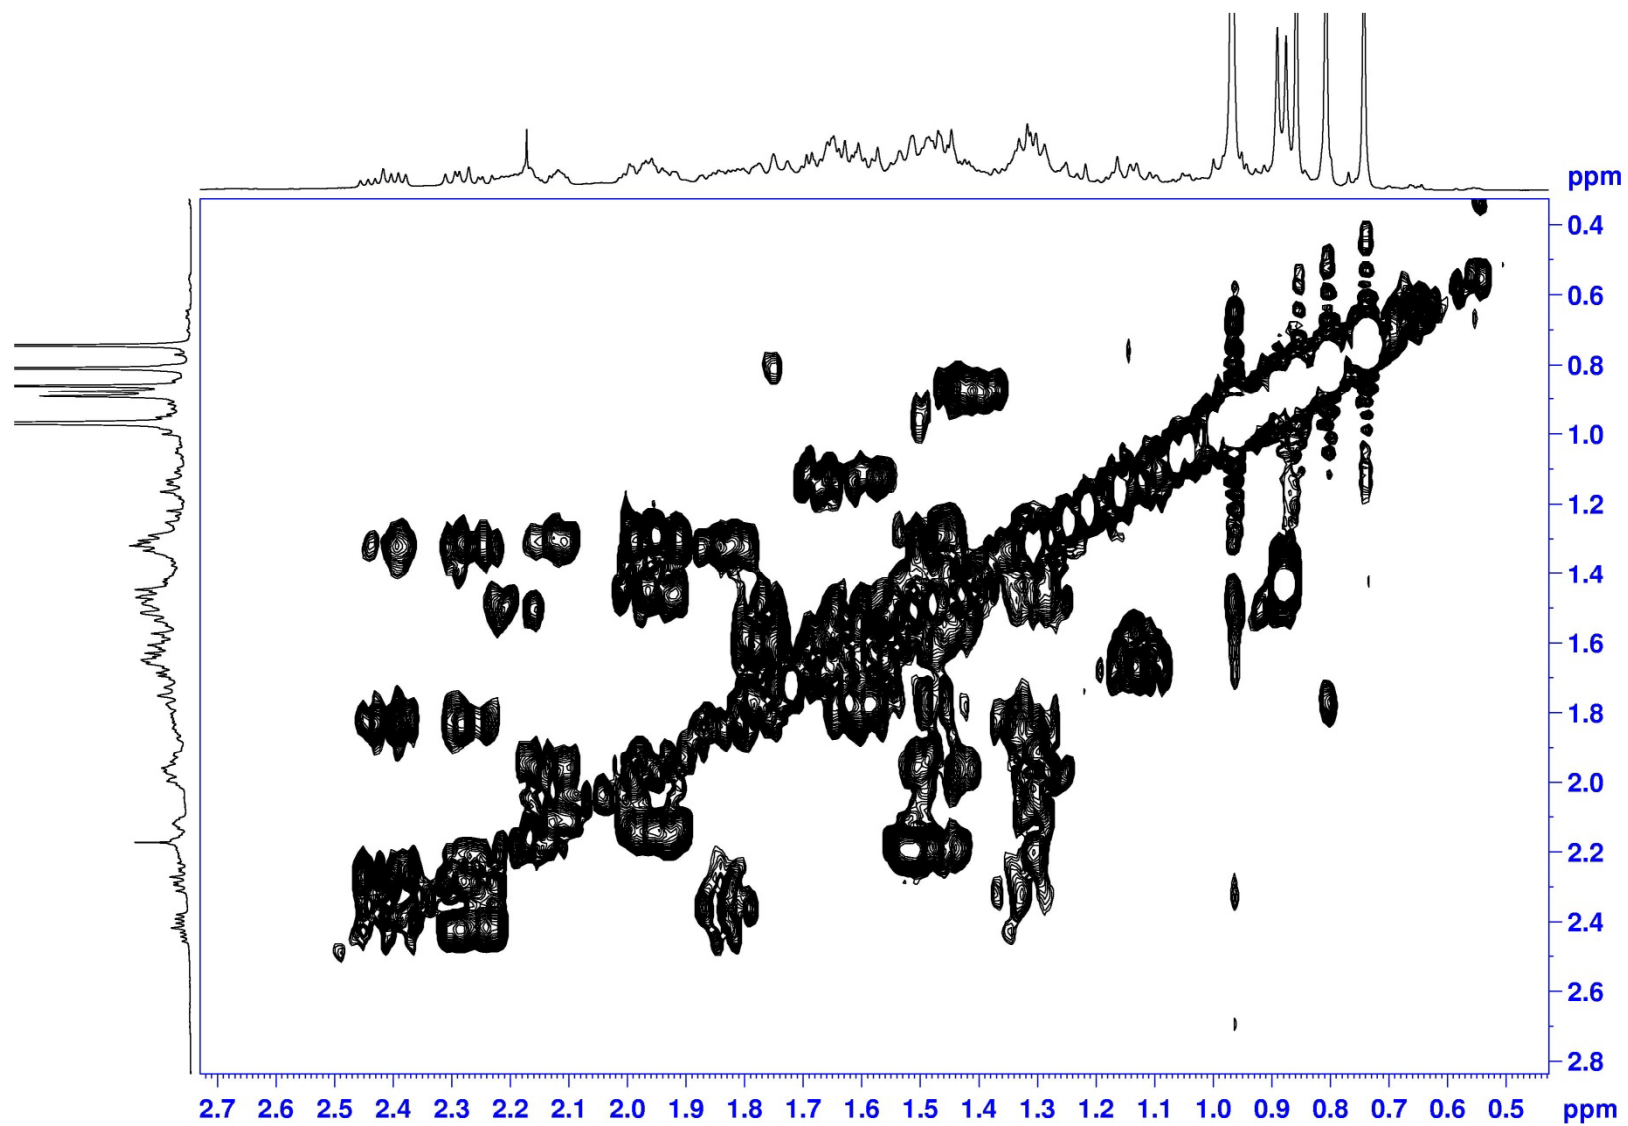

$^1\text{H}$ - $^1\text{H}$  COSY (400 MHz) spectrum of compound **9** in  $\text{CDCl}_3$

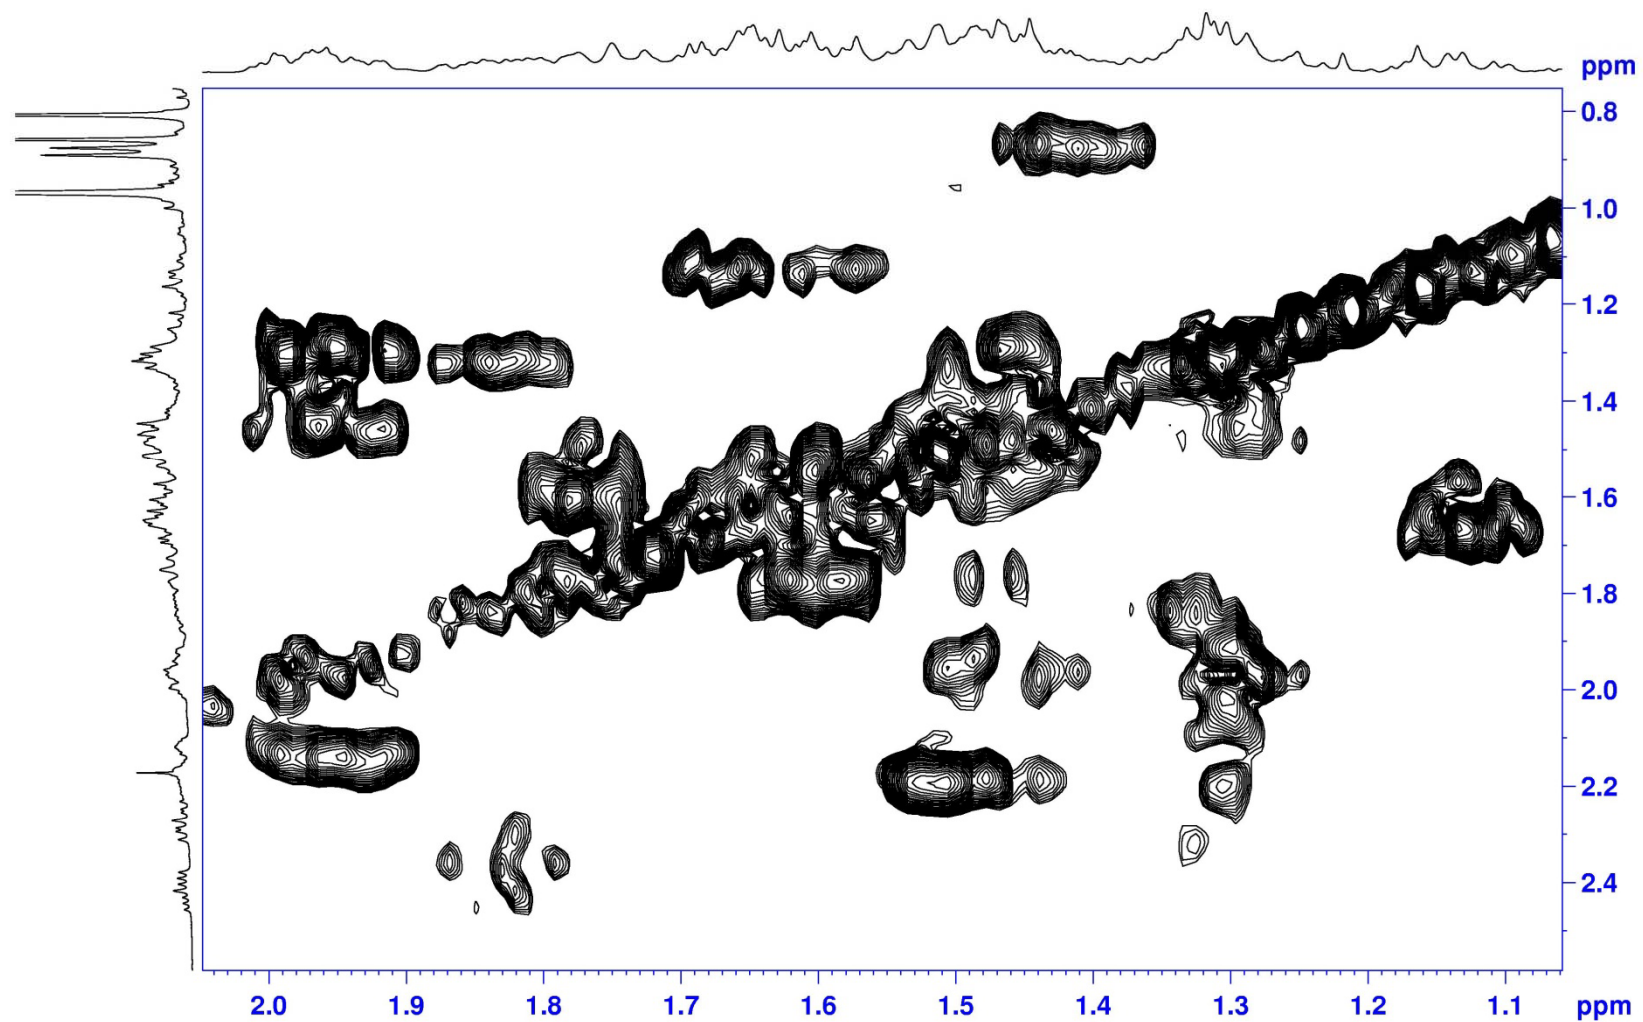

# HSQC (400 MHz) spectrum of compound **9** in CDCl<sub>3</sub>

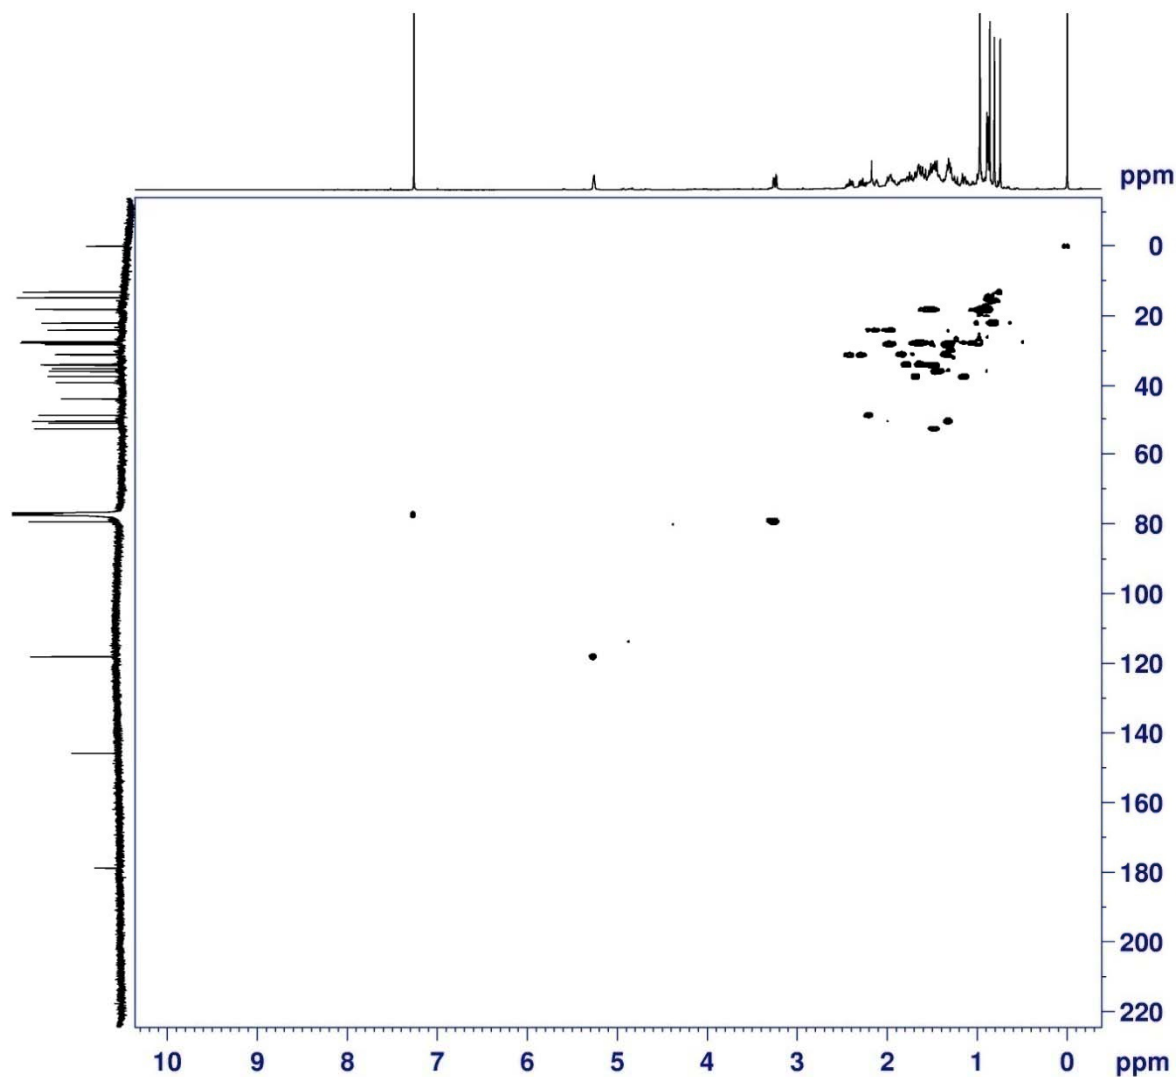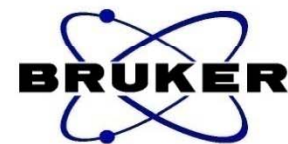

```

NAME      EA2-27 (EA2-33-3)
EXPNO      104
PROCNO      1
Date_      20170620
Time       13.06
INSTRUM     spect
PROBHD      5 mm CPPBBO BB
PULPROG     hsqcetgpsi2
TD          1024
SOLVENT      CDCl3
NS          16
DS          16
SWH         4302.926 Hz
FIDRES      4.202076 Hz
AQ          0.1190388 sec
RG          208.5
DW          116.200 usec
DE          10.00 usec
TE          297.0 K
CNST2       145.0000000
D0          0.00000300 sec
D1          1.46497905 sec
D4          0.00172414 sec
D11         0.03000000 sec
D16         0.00020000 sec
D24         0.00086207 sec
IN0         0.00002080 sec
ZGPTNS
  
```

```

===== CHANNEL f1 =====
SF01       400.1320007 MHz
NUC1        1H
P1          11.50 usec
P2          23.00 usec
P28         0.00 usec
ND0         2
TD          256
SF01       100.6233 MHz
FIDRES      93.900238 Hz
SW          238.896 ppm
FnMODE      Echo-Antiecho
SI          1024
SF         400.1300068 MHz
WDW         QSINE
SSB         2
LB          0.00 Hz
GB          0
PC          1.40
SI          1024
MC2         echo-antiecho
SF         100.6127543 MHz
WDW         QSINE
SSB         2
LB          0.00 Hz
CP          0
  
```

HSQC (400 MHz) spectrum of compound **9** in CDCl<sub>3</sub>

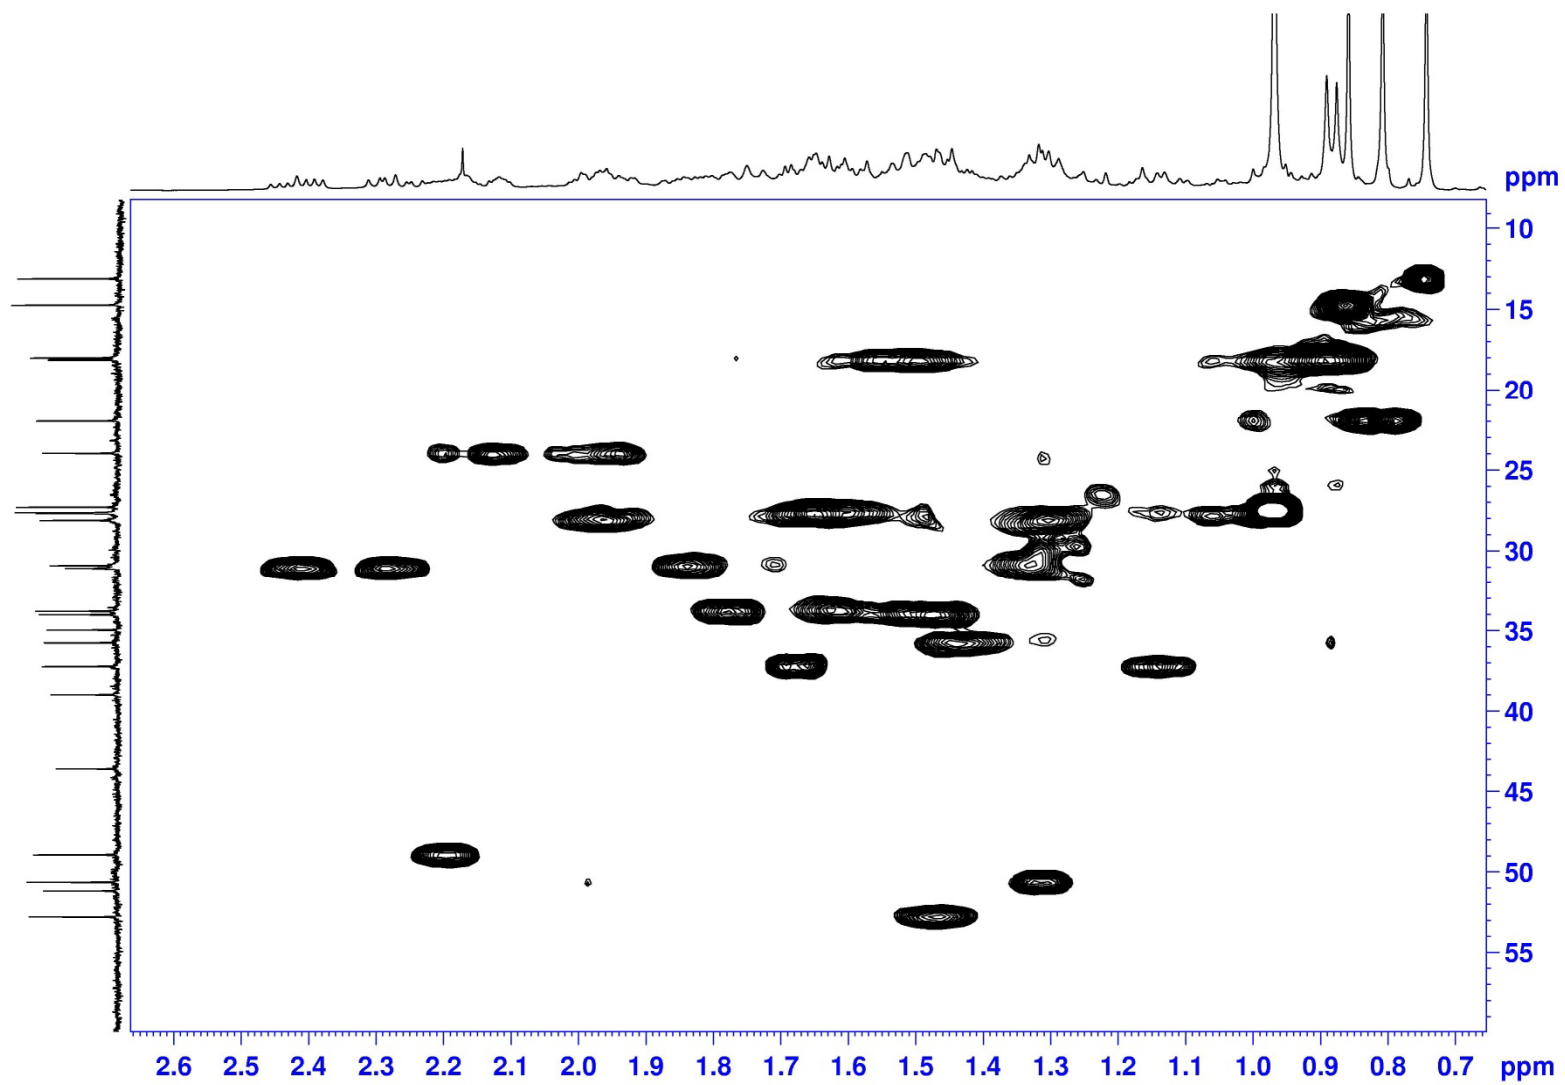

HSQC (400 MHz) spectrum of compound **9** in CDCl<sub>3</sub>

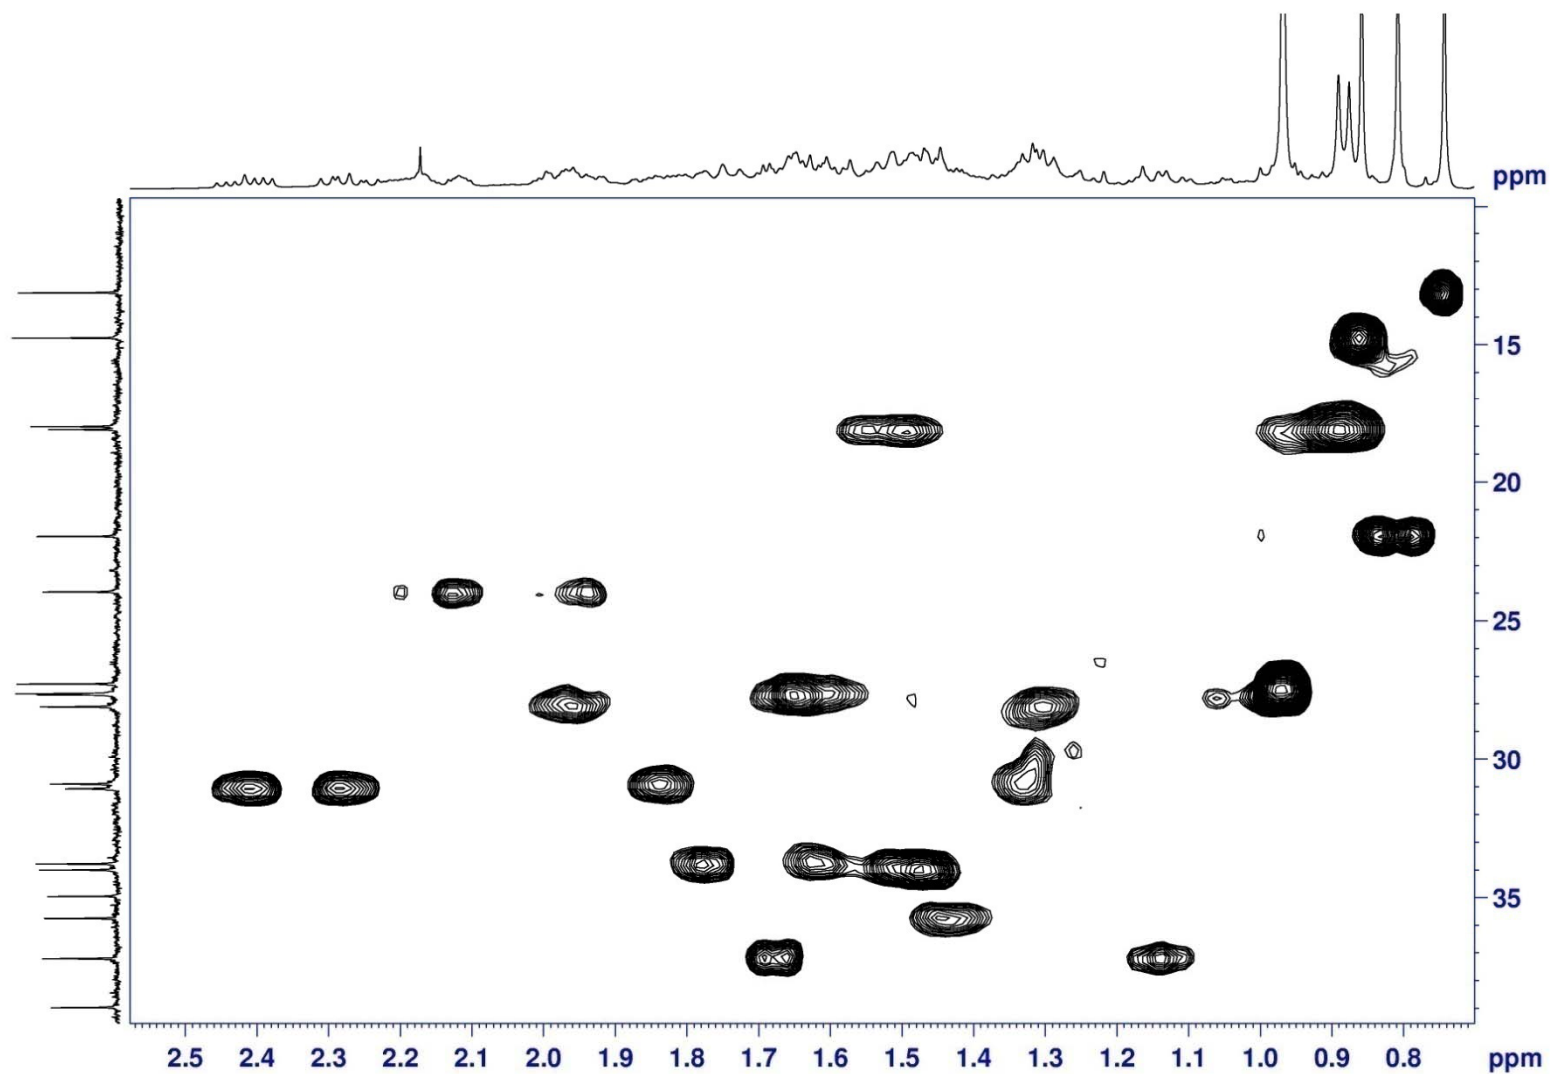

# HMBC (400 MHz) spectrum of compound **9** in CDCl<sub>3</sub>

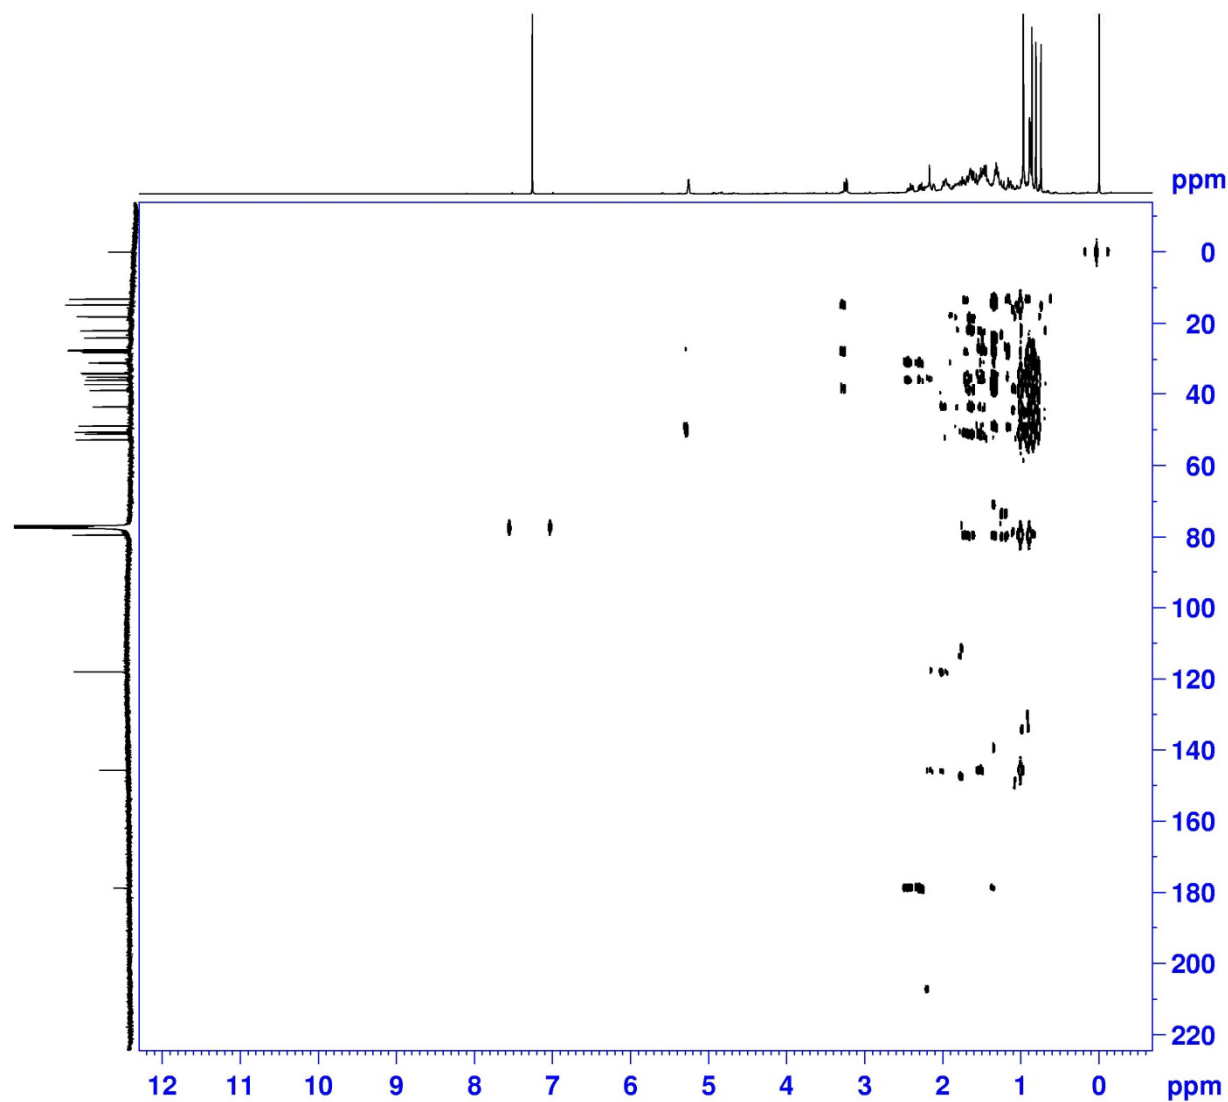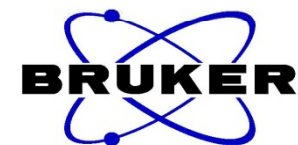

```

NAME      EA2-27 (EA2-33-3)
EXPNO      1006
PROCNO      1
Date_      20170620
Time       23.02
INSTRUM     spect
PROBHD      5 mm CPMBO BB
PULPROG     hmbcgp1pndqf
TD          4096
SOLVENT     CDCl3
NS          64
DS          16
SWH         5197.505 Hz
FIDRES      1.268922 Hz
AQ          0.3940852 sec
RG          208.5
DW          96.200 usec
DE          10.00 usec
TE          297.0 K
CNST2       145.0000000
CNST13      10.0000000
D0          0.00000300 sec
D1          1.50000000 sec
D2          0.00344828 sec
D6          0.05000000 sec
D16         0.00020000 sec
IN0         0.00002080 sec
    
```

```

===== CHANNEL f1 =====
SFO1       400.1323208 MHz
NUC1        1H
P1          11.50 usec
P2          23.00 usec
ND0         2
TD          128
SFO1       100.6233 MHz
FIDRES      187.800476 Hz
SW          238.896 ppm
FnMODE      QF
SI          2048
SF          400.1300000 MHz
WDW         SINE
SSB         0
LB          0.00 Hz
GB          0
PC          1.40
SI          1024
MC2         QF
SF          100.6127685 MHz
WDW         SINE
SSB         0
    
```

HMBC (400 MHz) spectrum of compound **9** in  $\text{CDCl}_3$

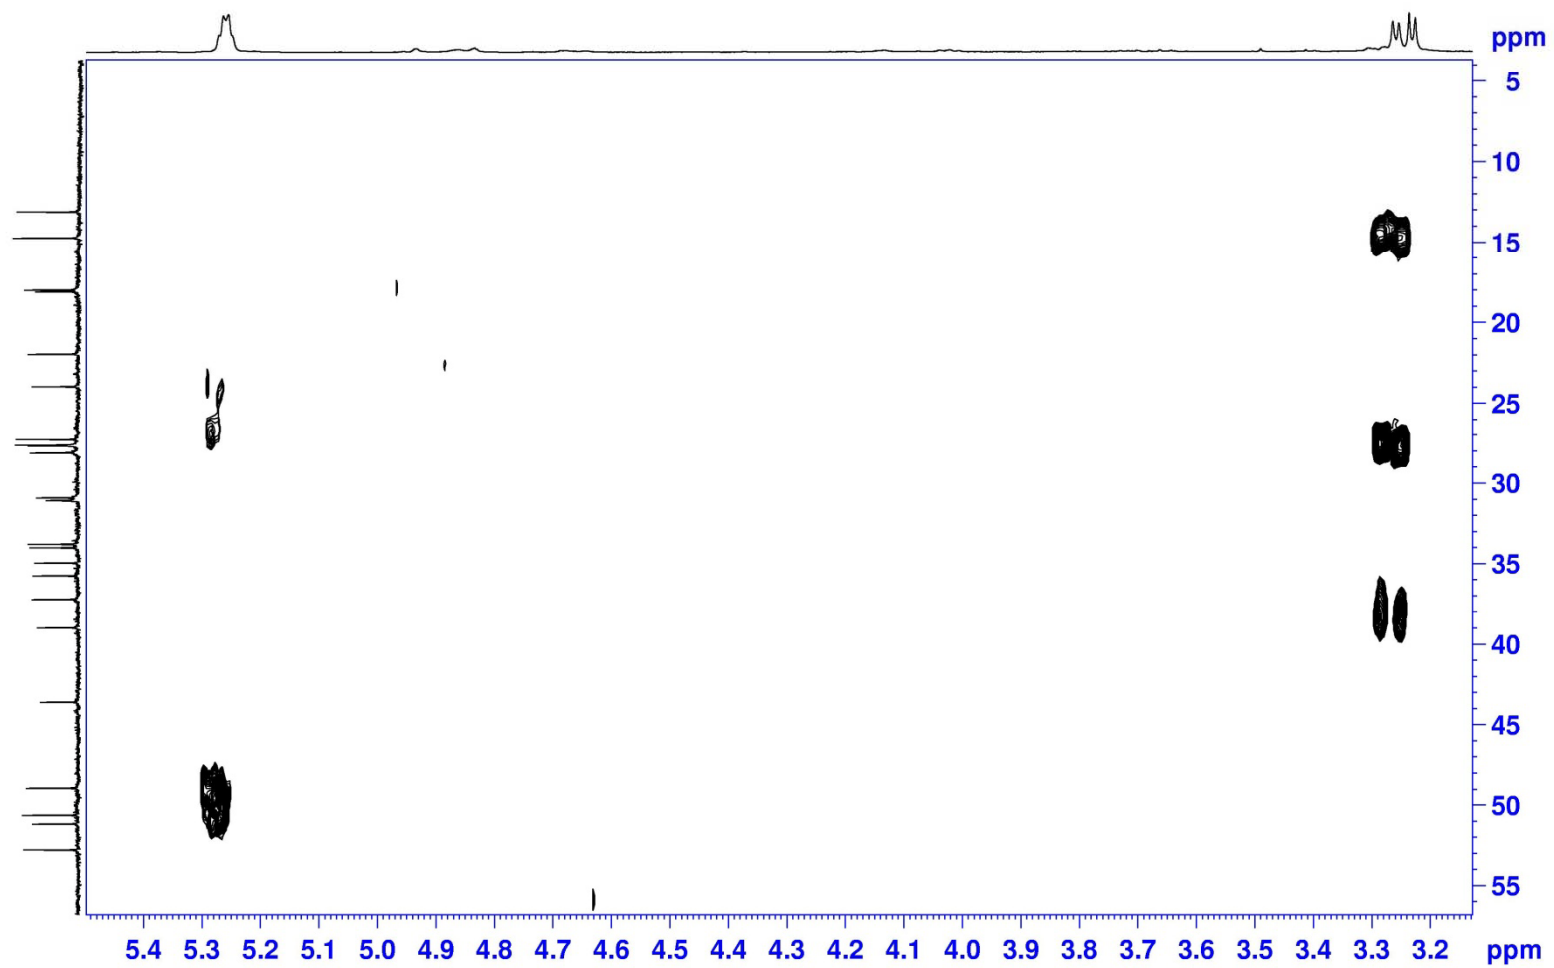



HMBC (400 MHz) spectrum of compound **9** in CDCl<sub>3</sub>

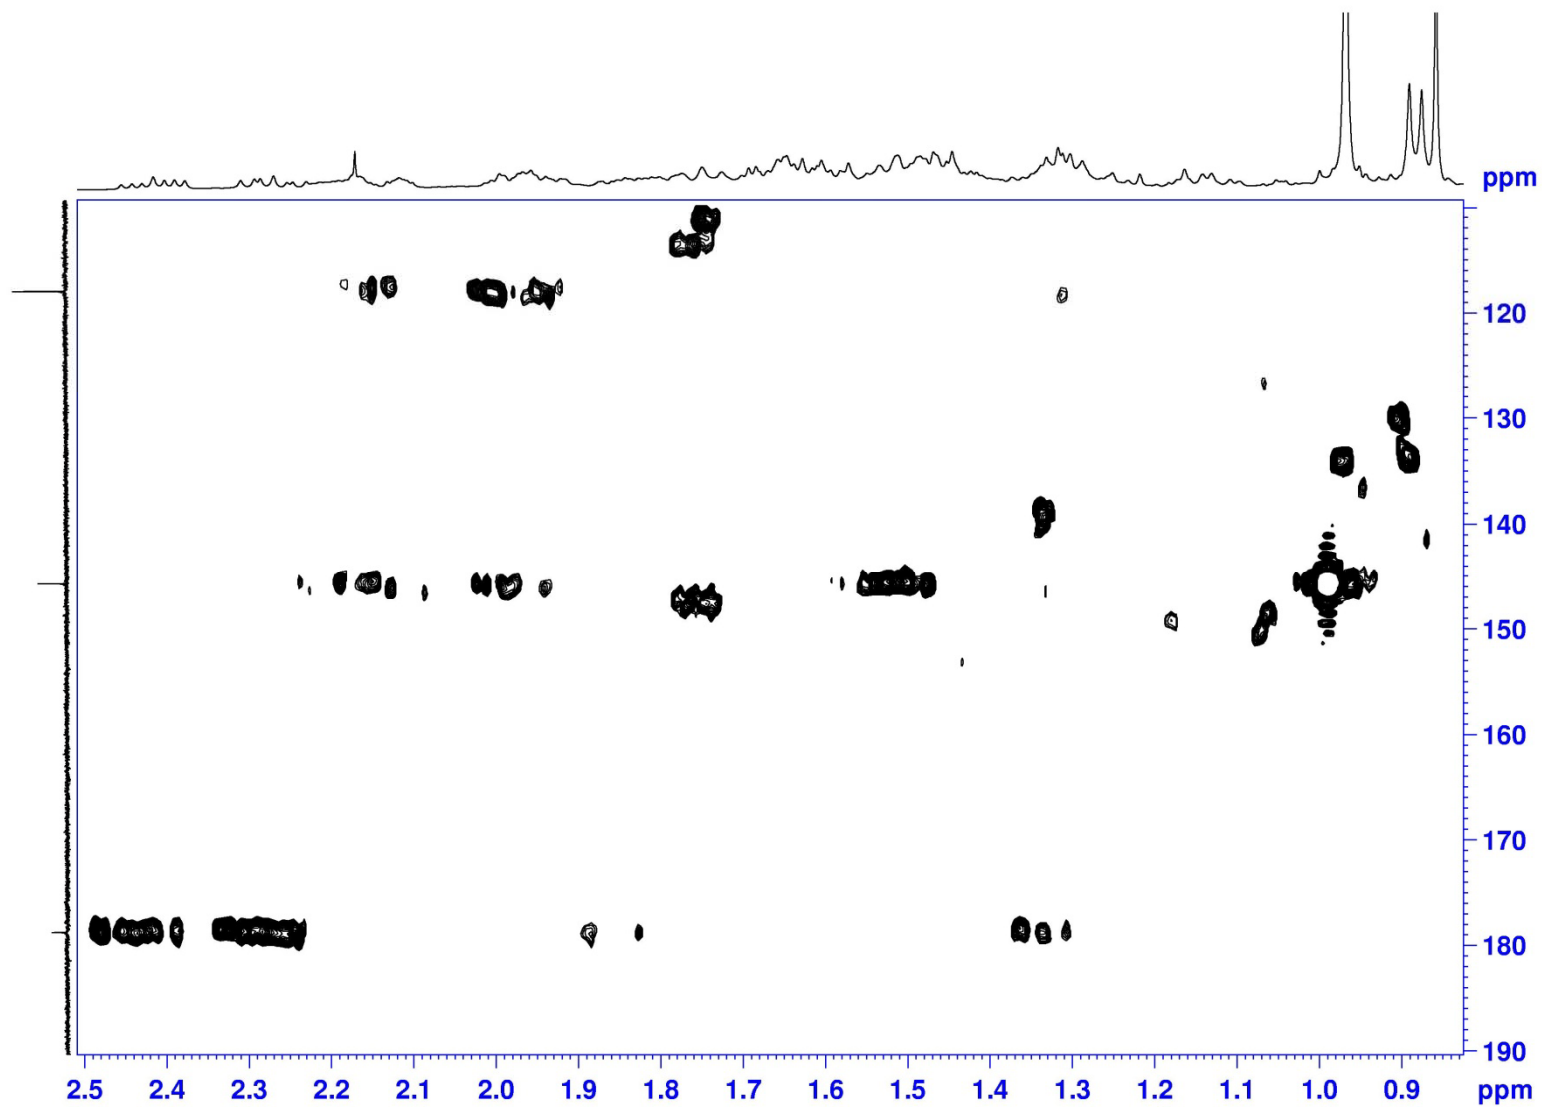

HMBC (400 MHz) spectrum of compound **9** in CDCl<sub>3</sub>

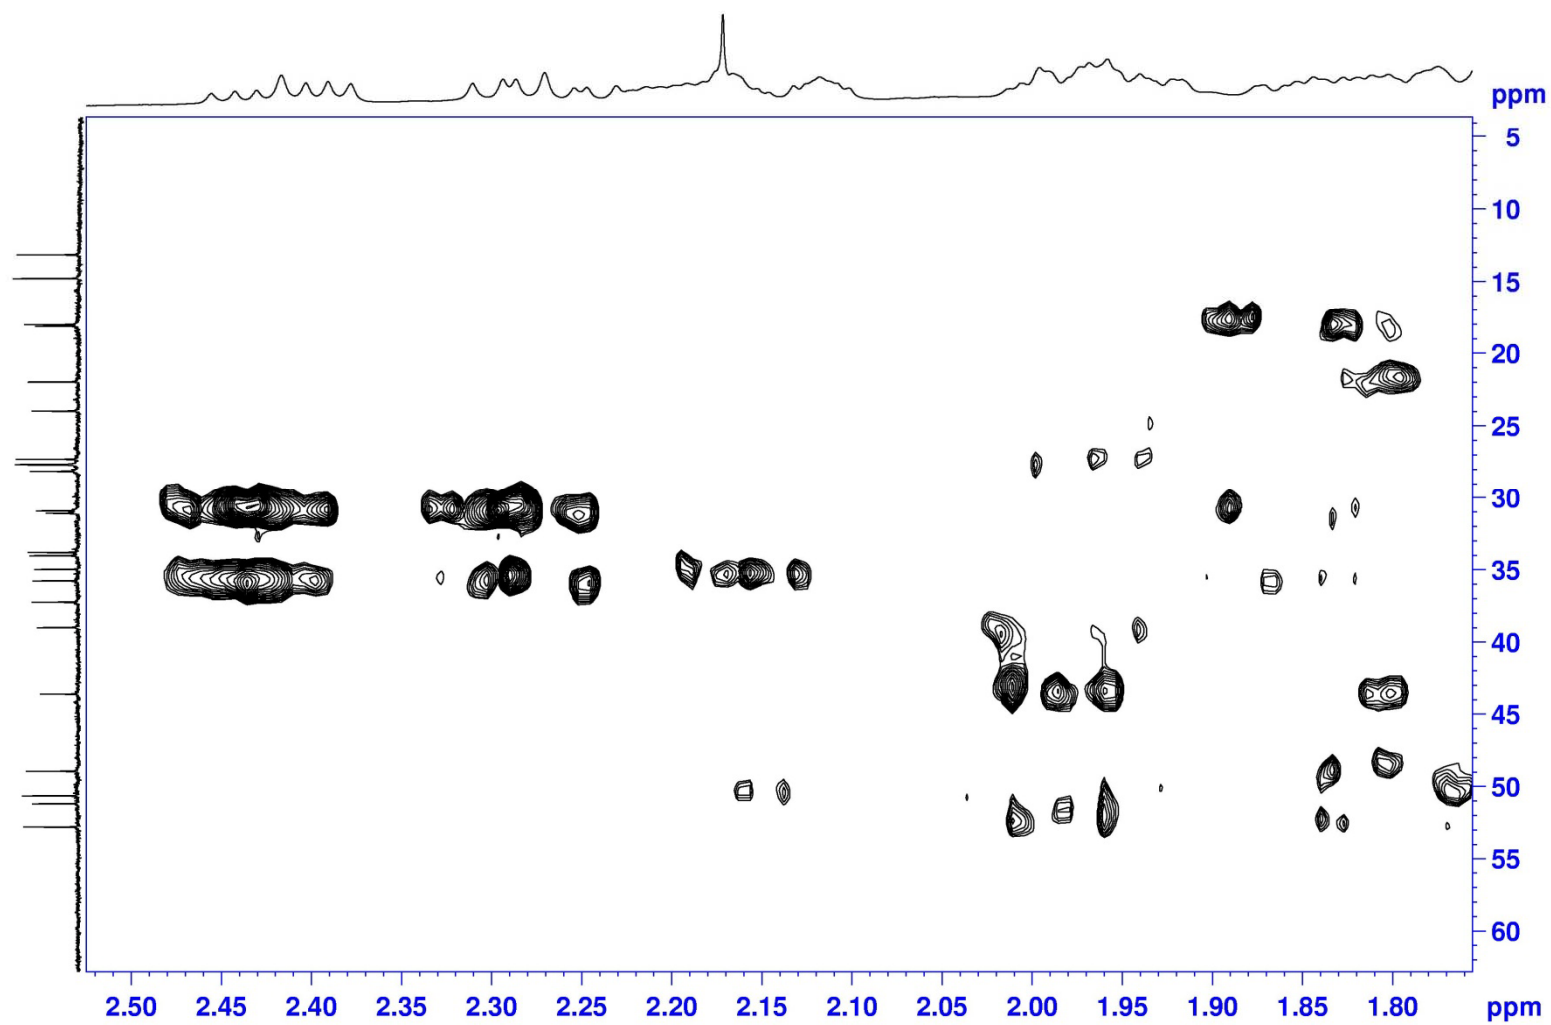

HMBC (400 MHz) spectrum of compound **9** in CDCl<sub>3</sub>

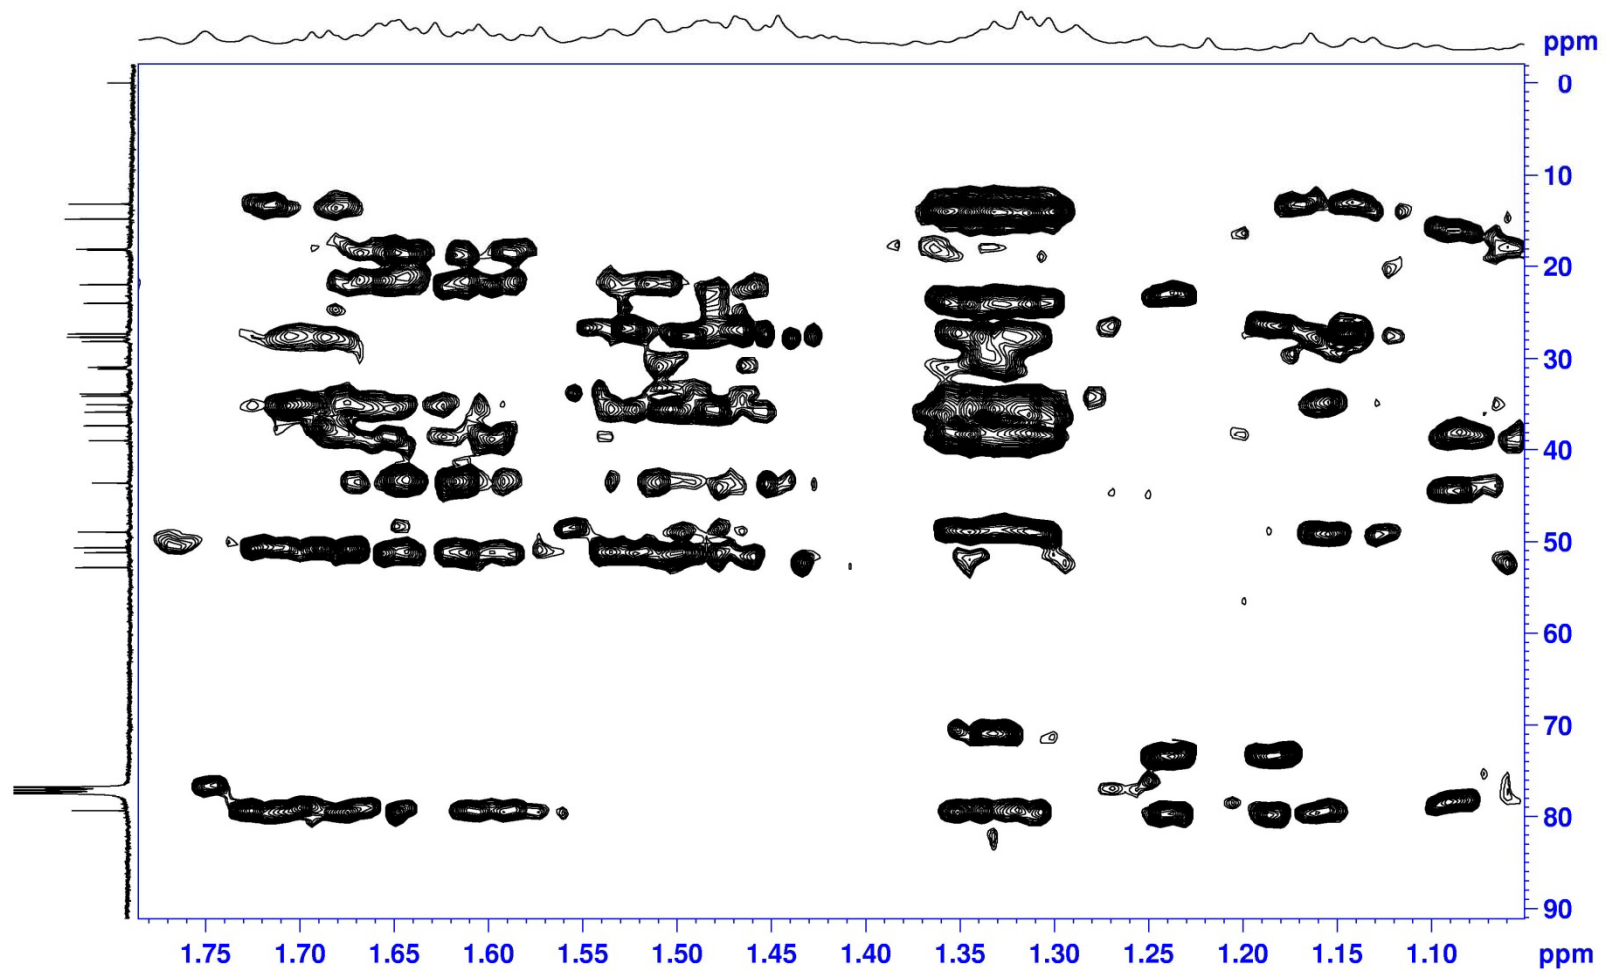

HMBC (400 MHz) spectrum of compound **9** in CDCl<sub>3</sub>

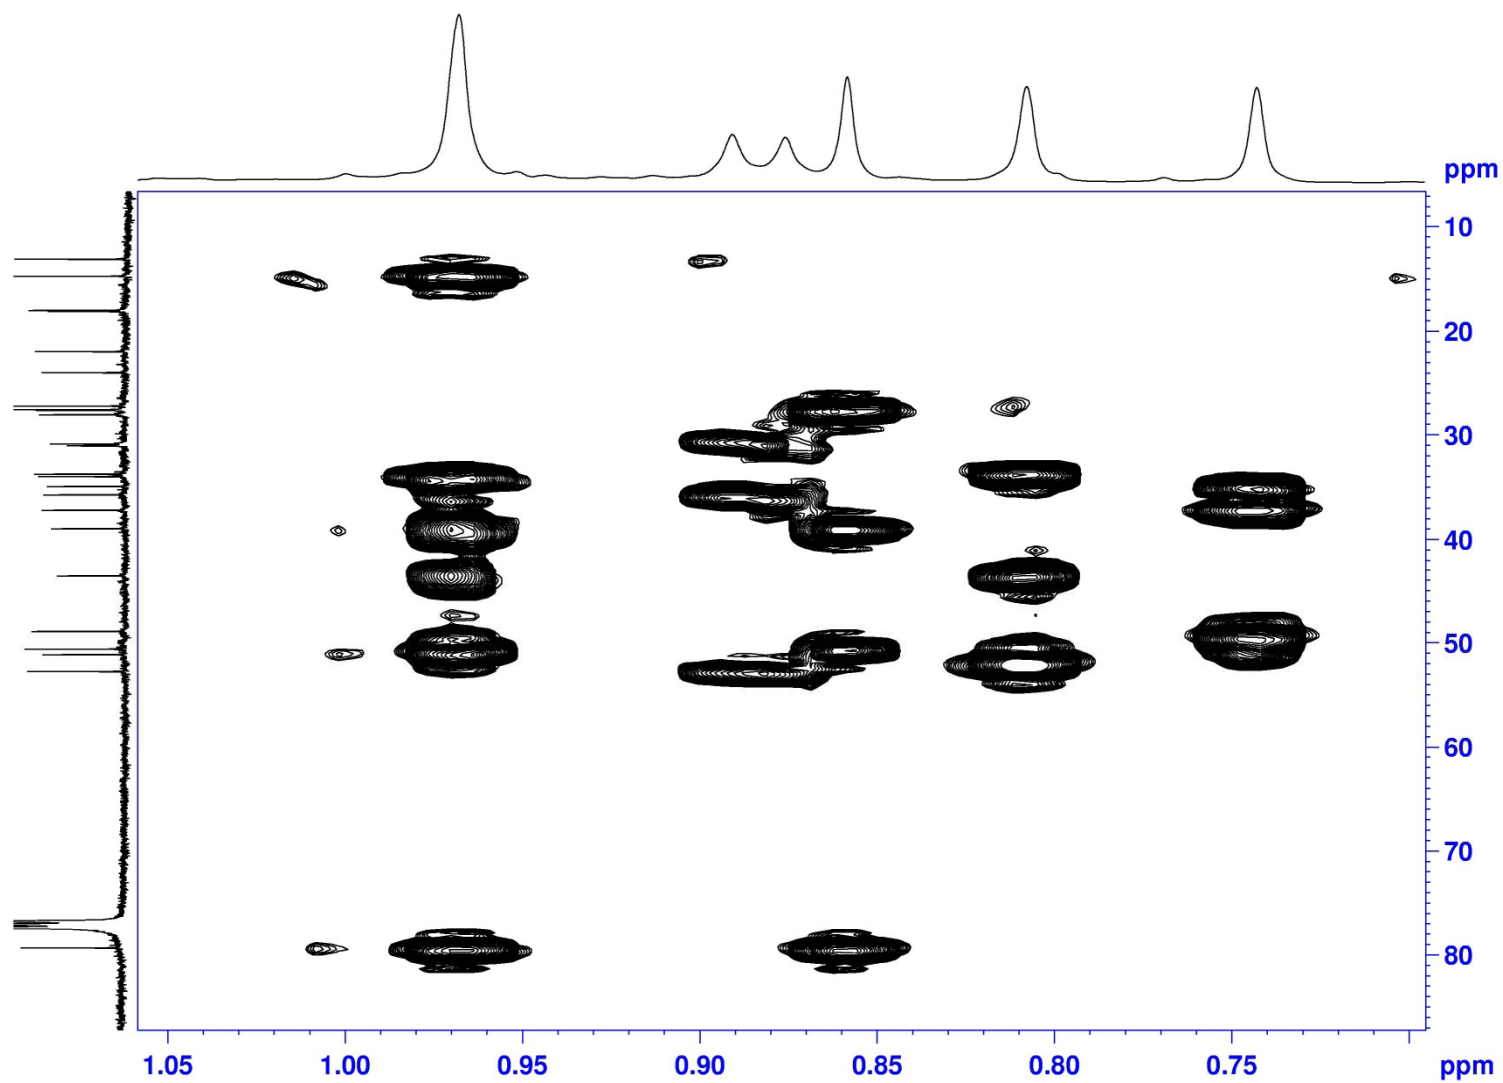

# NOESY (400 MHz) spectrum of compound **9** in CDCl<sub>3</sub>

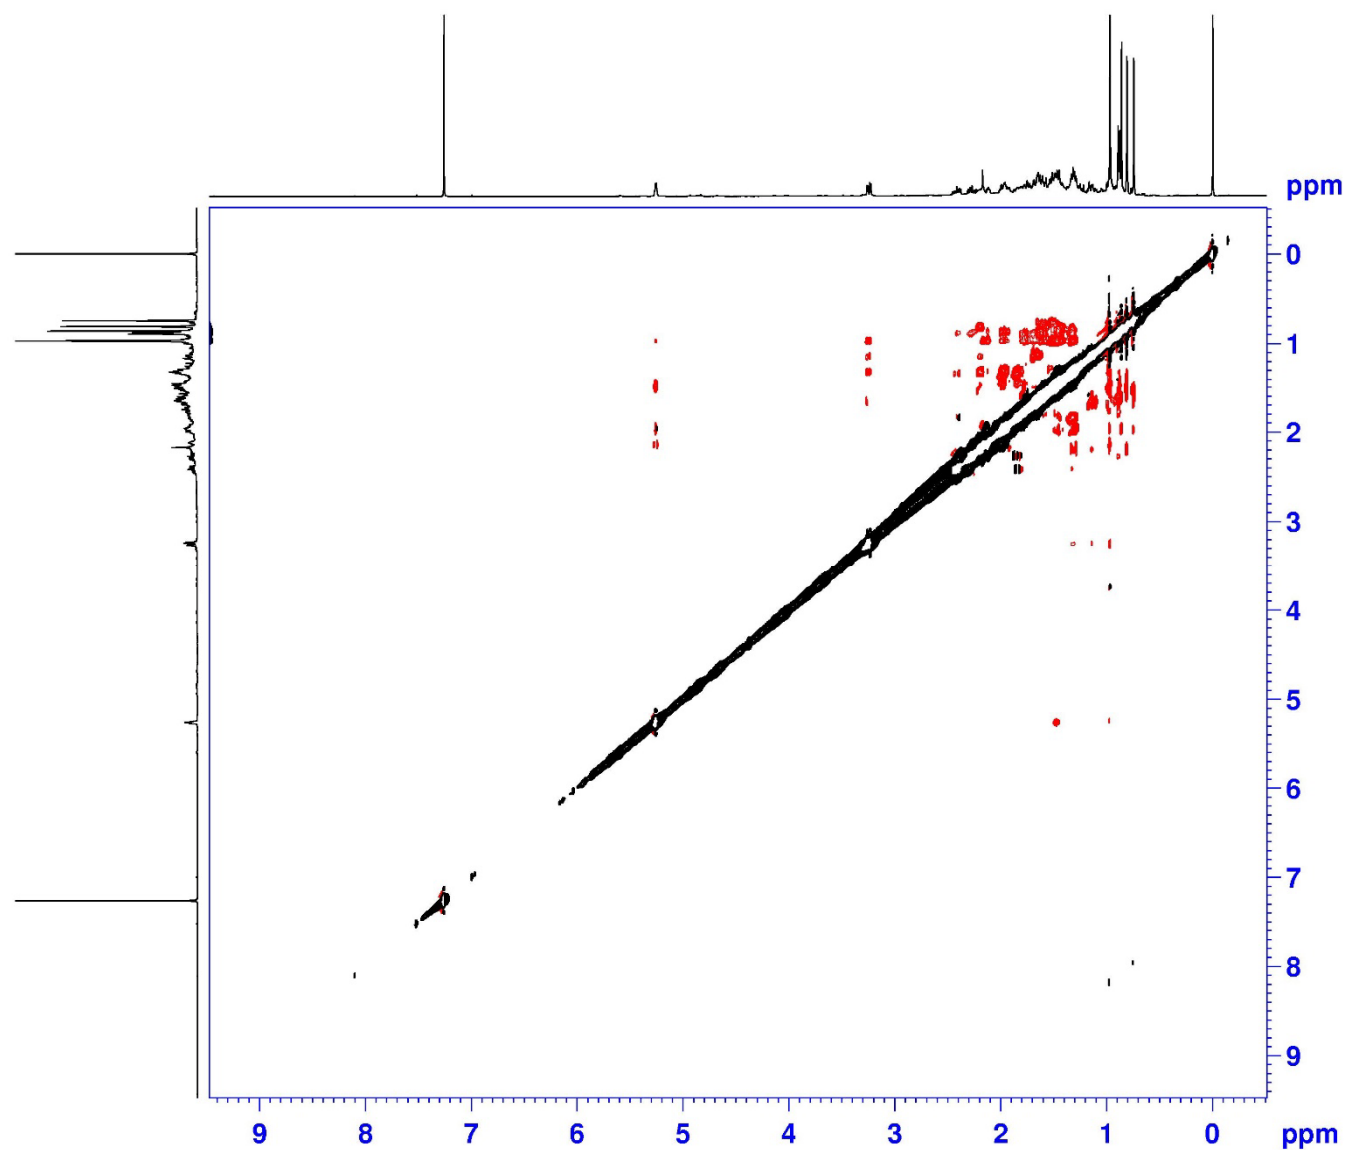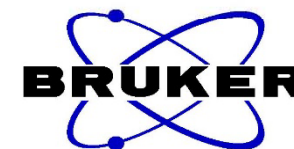

```

NAME      EA2-27 (EA2-33-3)
EXPNO      1007
PROCNO      1
Date_      20170621
Time       3.31
INSTRUM     spect
PROBHD      5 mm CPPBBO BB
PULPROG     noesygpphpp
TD          2048
SOLVENT     CDCl3
NS          32
DS          32
SWH         4000.000 Hz
FIDRES      1.953125 Hz
AQ          0.2560500 se.
RG          208.5
DW          125.000 us.
DE          10.00 us.
TE          297.0 K
D0          0.00011036 se.
D1          1.99385595 se.
D8          0.30000001 se.
D11         0.03000000 se.
D12         0.00002000 se.
D16         0.00020000 se.
IN0         0.00025000 se.
    
```

```

===== CHANNEL f1 =====
SFO1      400.1318006 MH
NUC1       1H
P1         11.50 us.
P2         23.00 us.
P17        2500.00 us.
ND0         1
TD          256
SFO1      400.1318 MH
FIDRES     15.625000 Hz
SW          9.997 ppi
FnMODE     States-TPPI
SI          1024
SF         400.1300098 MH
WDW         QSINE
SSB         2
LB          0.00 Hz
GB          0
PC          1.00
SI          1024
MC2        States-TPPI
SF         400.1300098 MH
WDW         QSINE
SSB         ?
    
```

**S247**

NOESY (400 MHz) spectrum of compound **9** in  $\text{CDCl}_3$

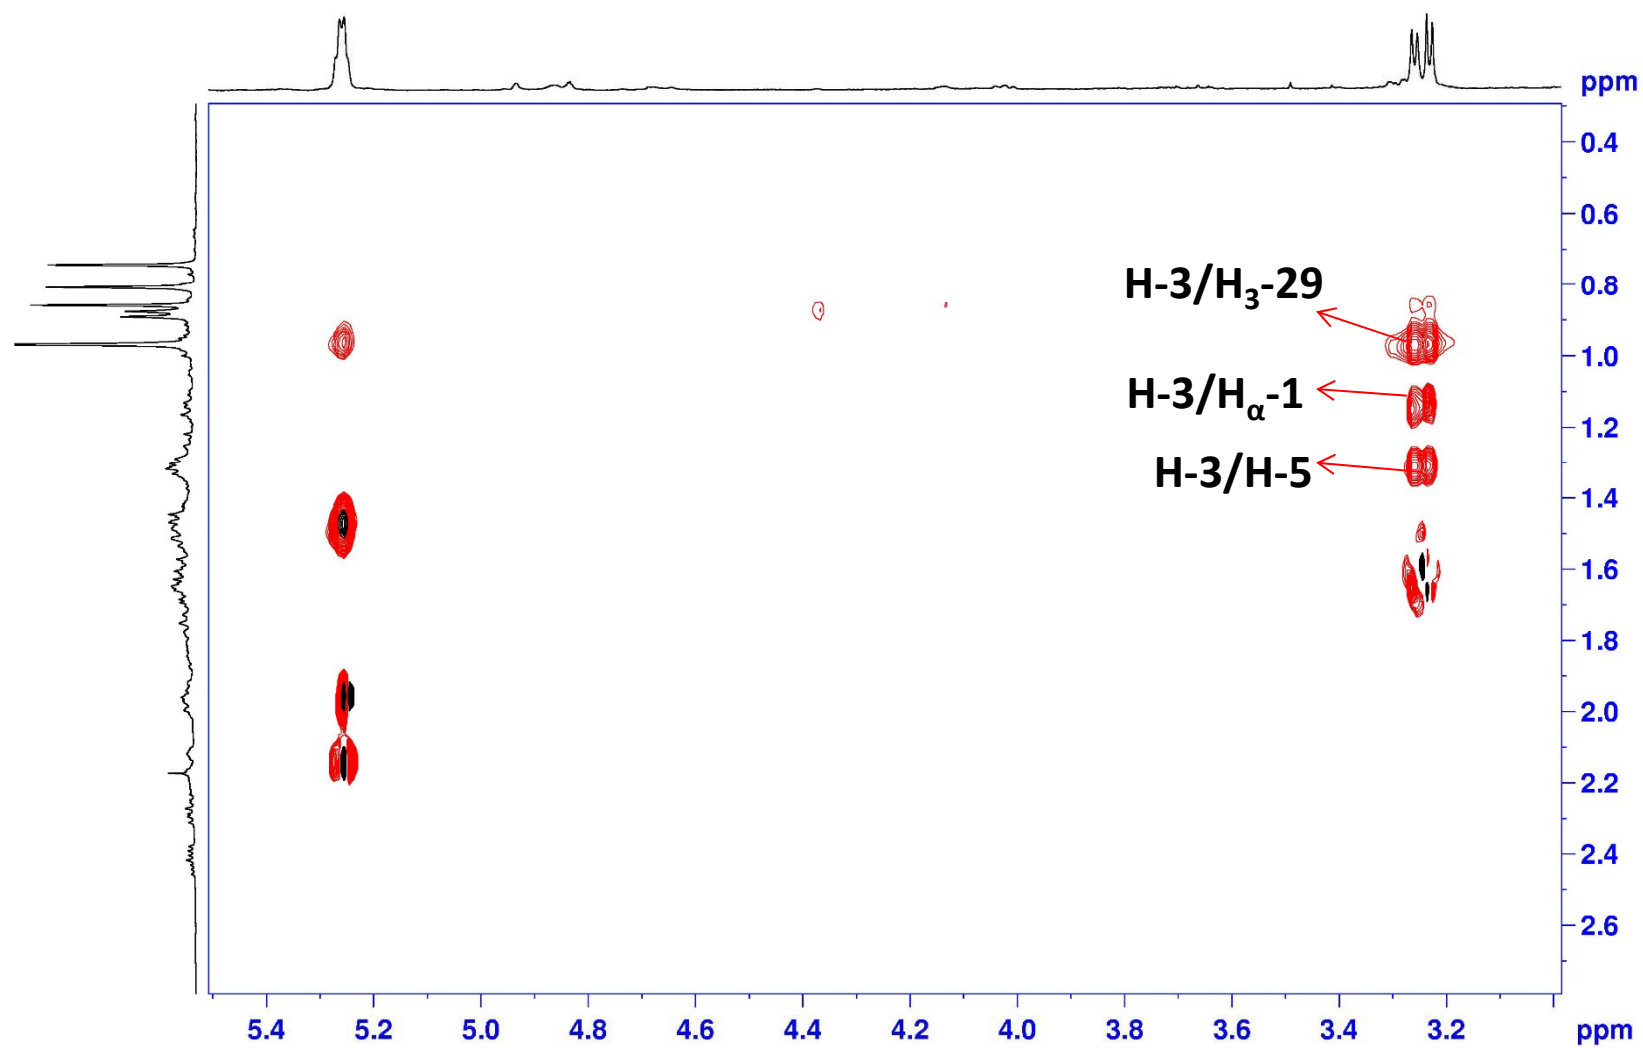

NOESY (400 MHz) spectrum of compound **9** in  $\text{CDCl}_3$

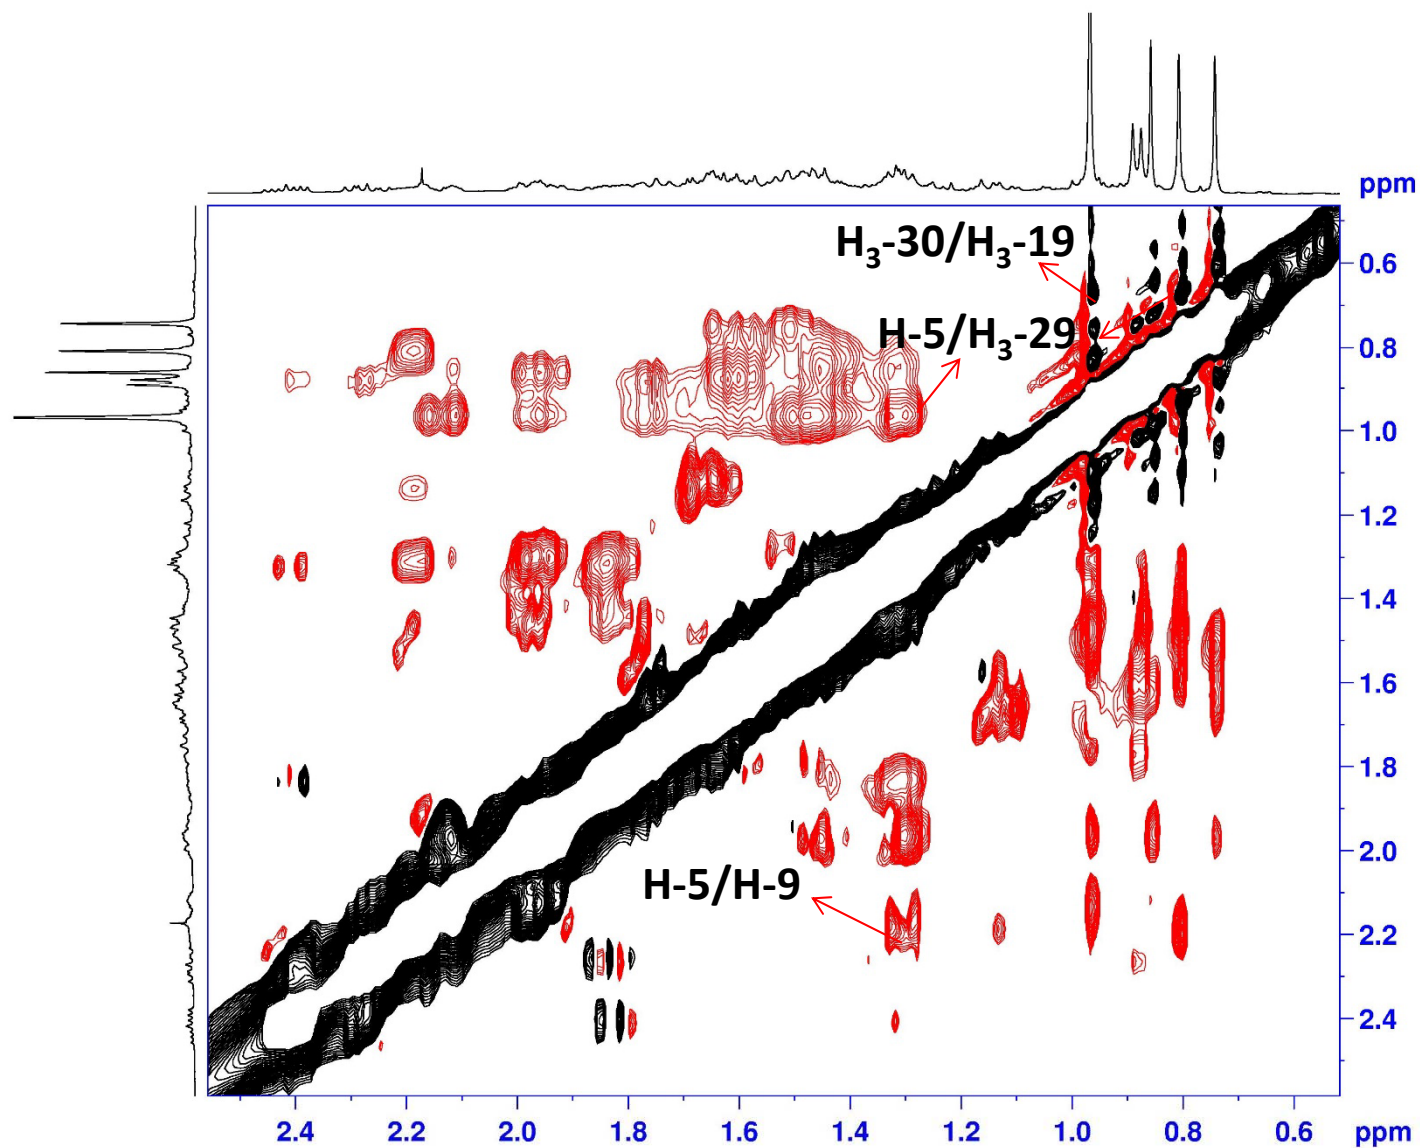



NOESY (400 MHz) spectrum of compound **9** in CDCl<sub>3</sub>

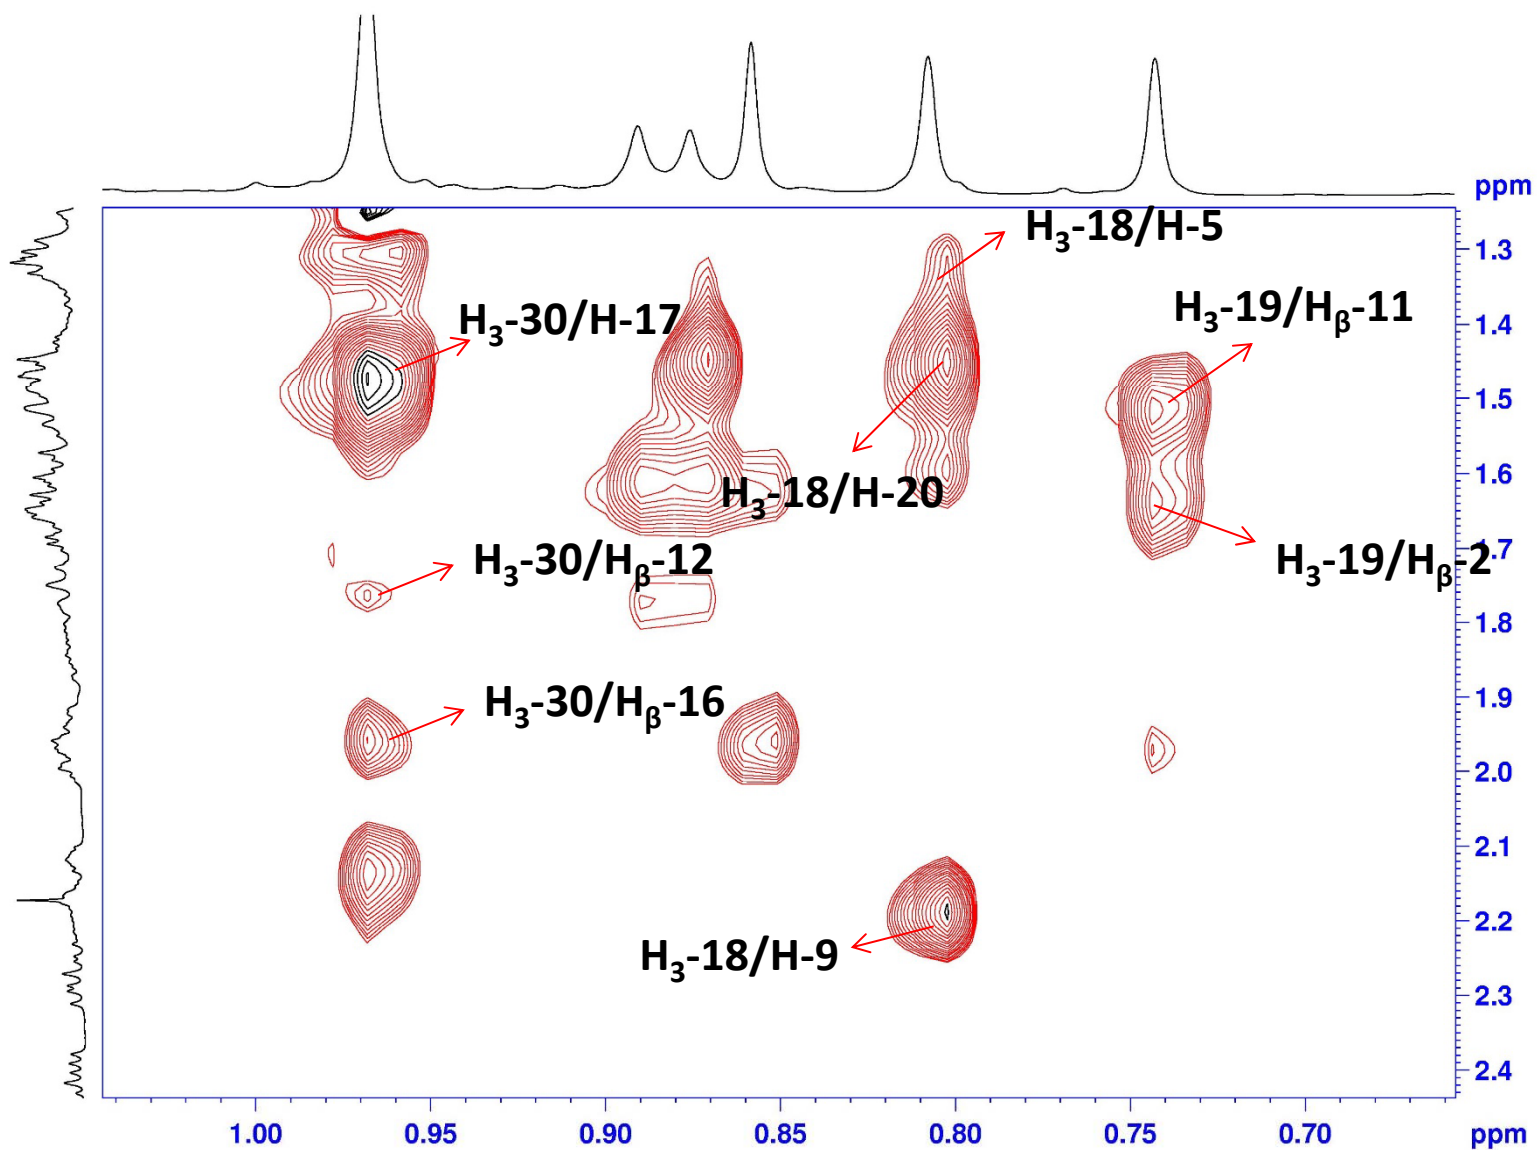



## HR-ESIMS for compound **10**

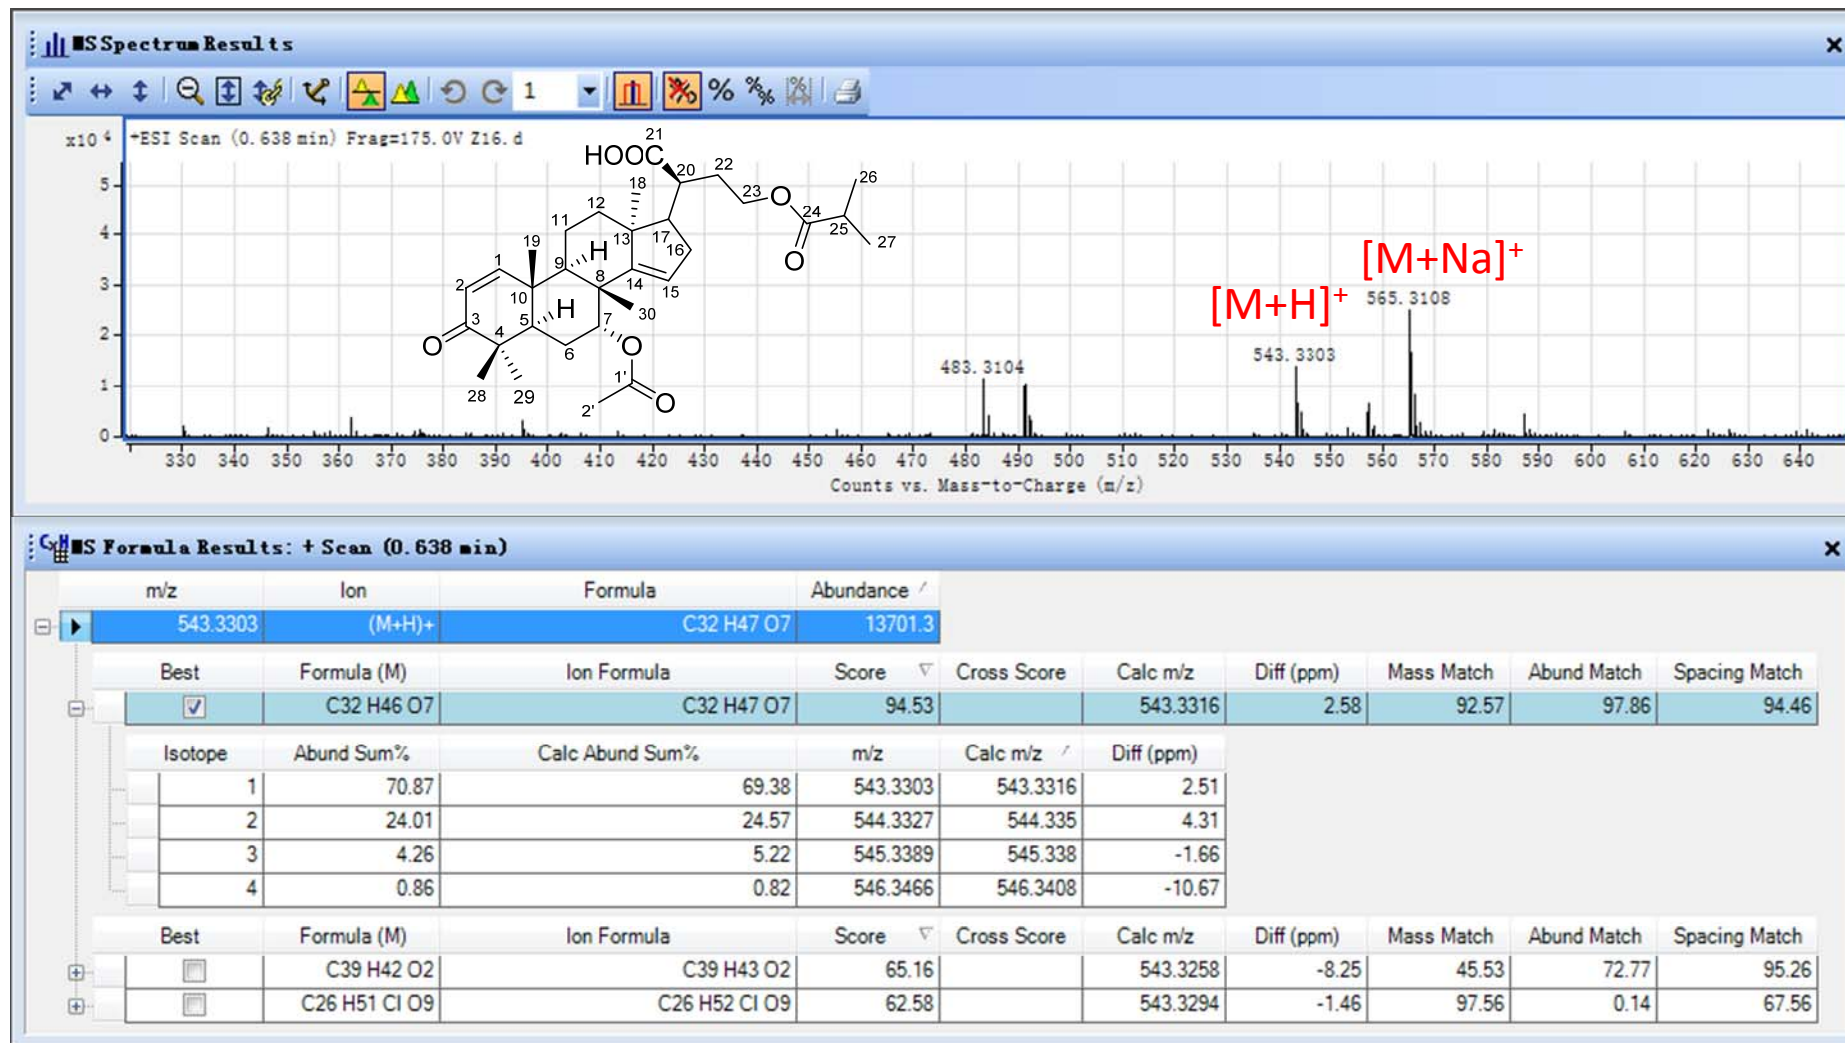

$^1\text{H}$  NMR (400 MHz) spectrum of compound **10** in  $\text{CDCl}_3$

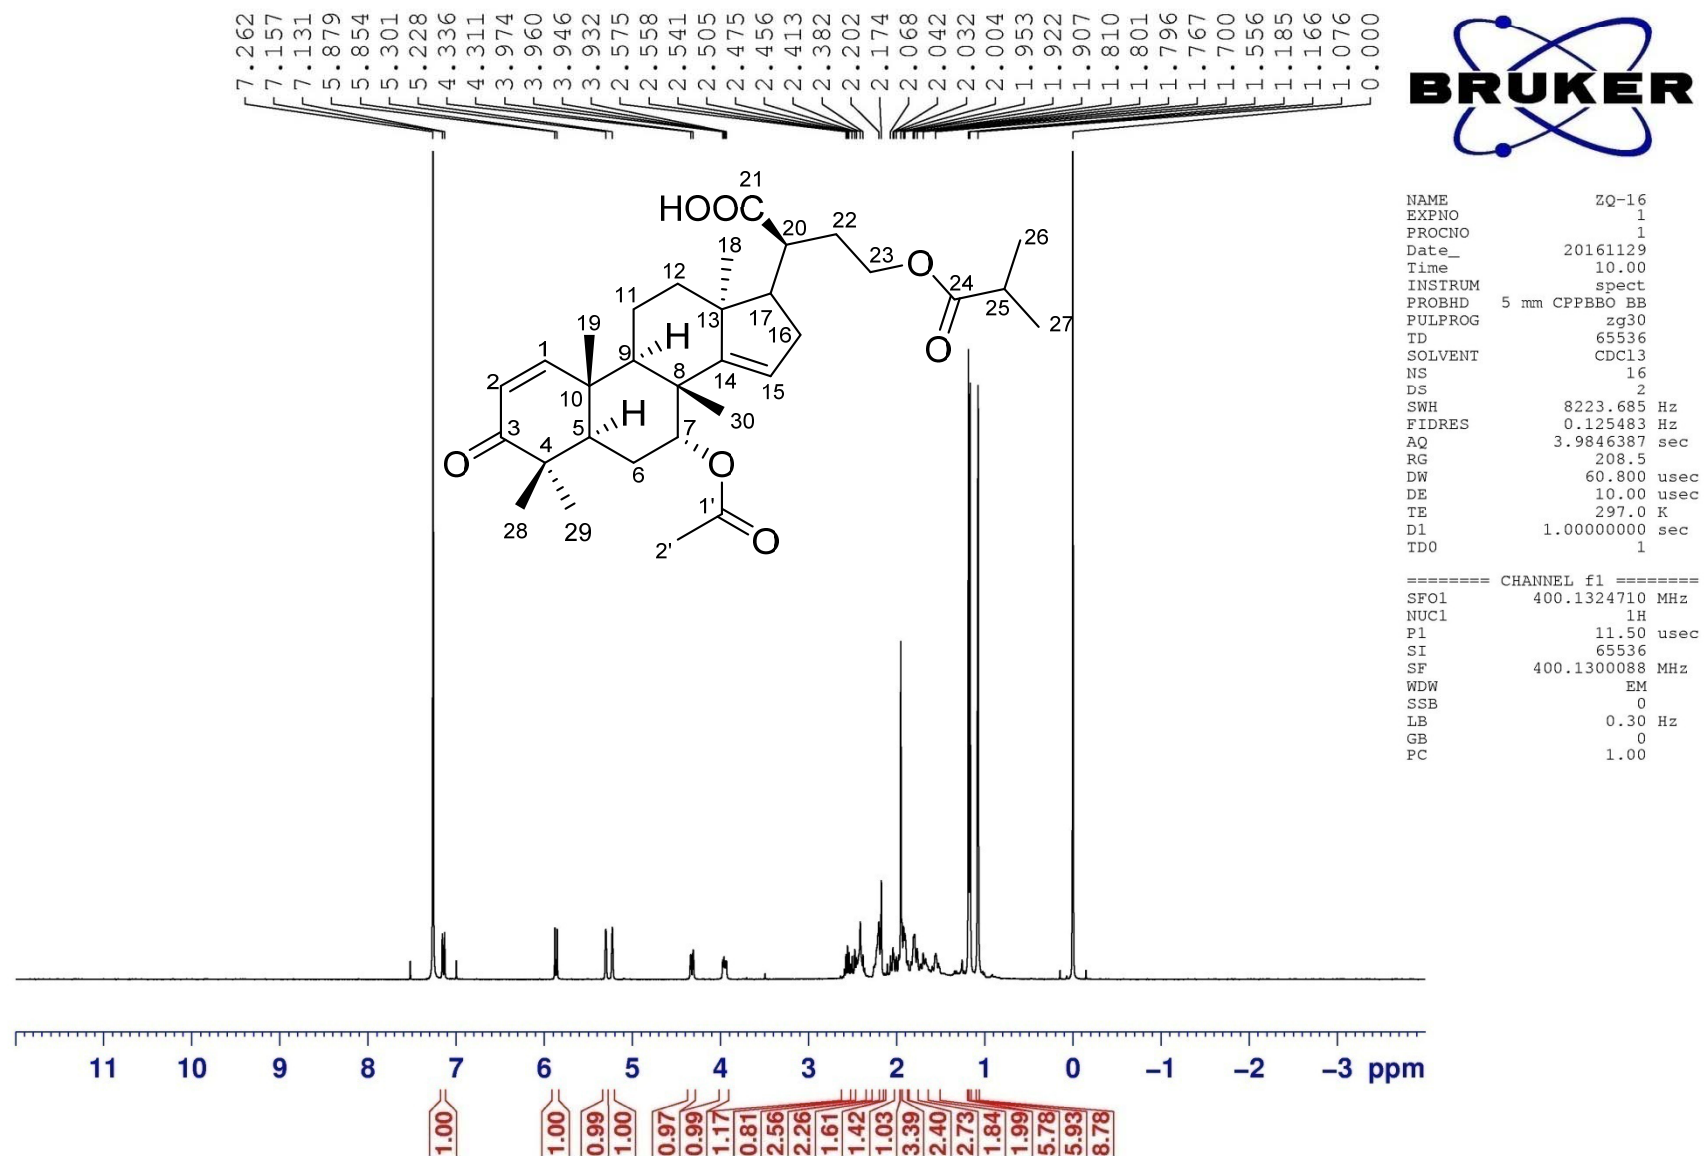

$^1\text{H}$  NMR (400 MHz) spectrum of compound **10** in  $\text{CDCl}_3$

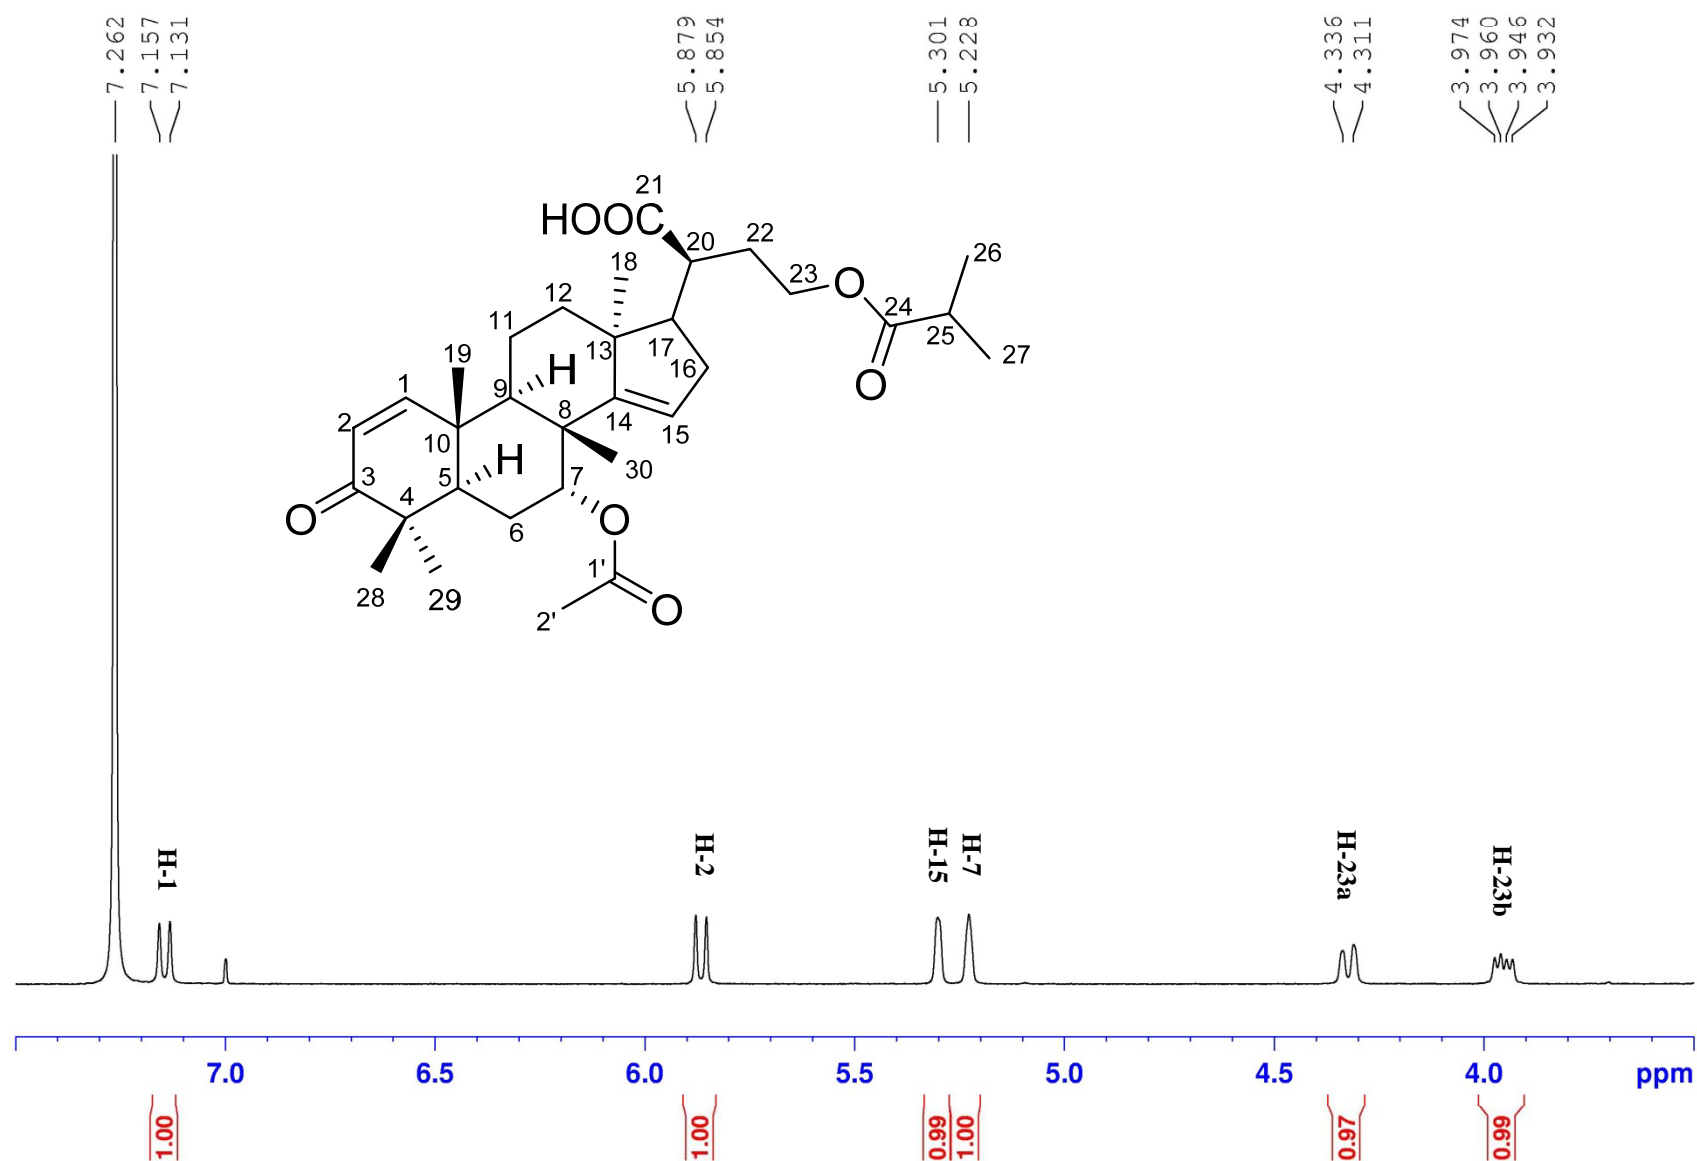

$^1\text{H}$  NMR (400 MHz) spectrum of compound **10** in  $\text{CDCl}_3$

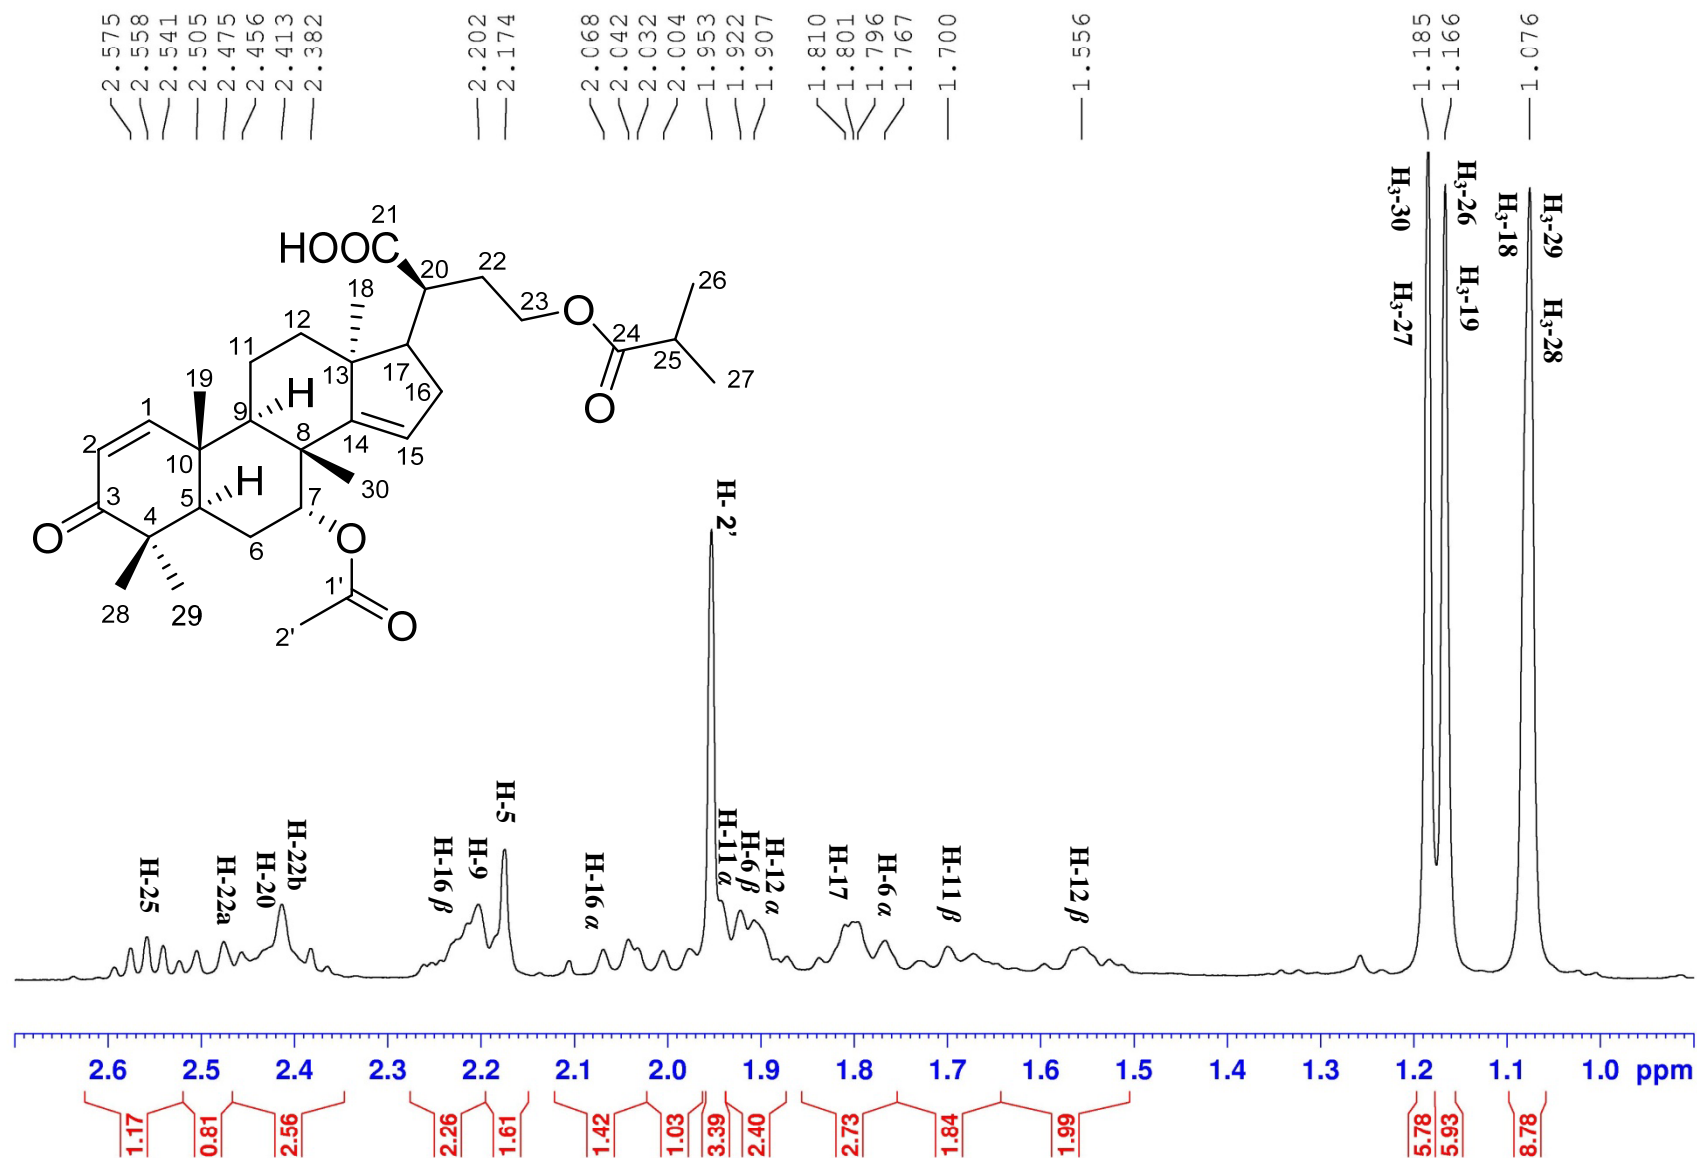

$^{13}\text{C}$  NMR (100 MHz) spectrum of compound **10** in  $\text{CDCl}_3$

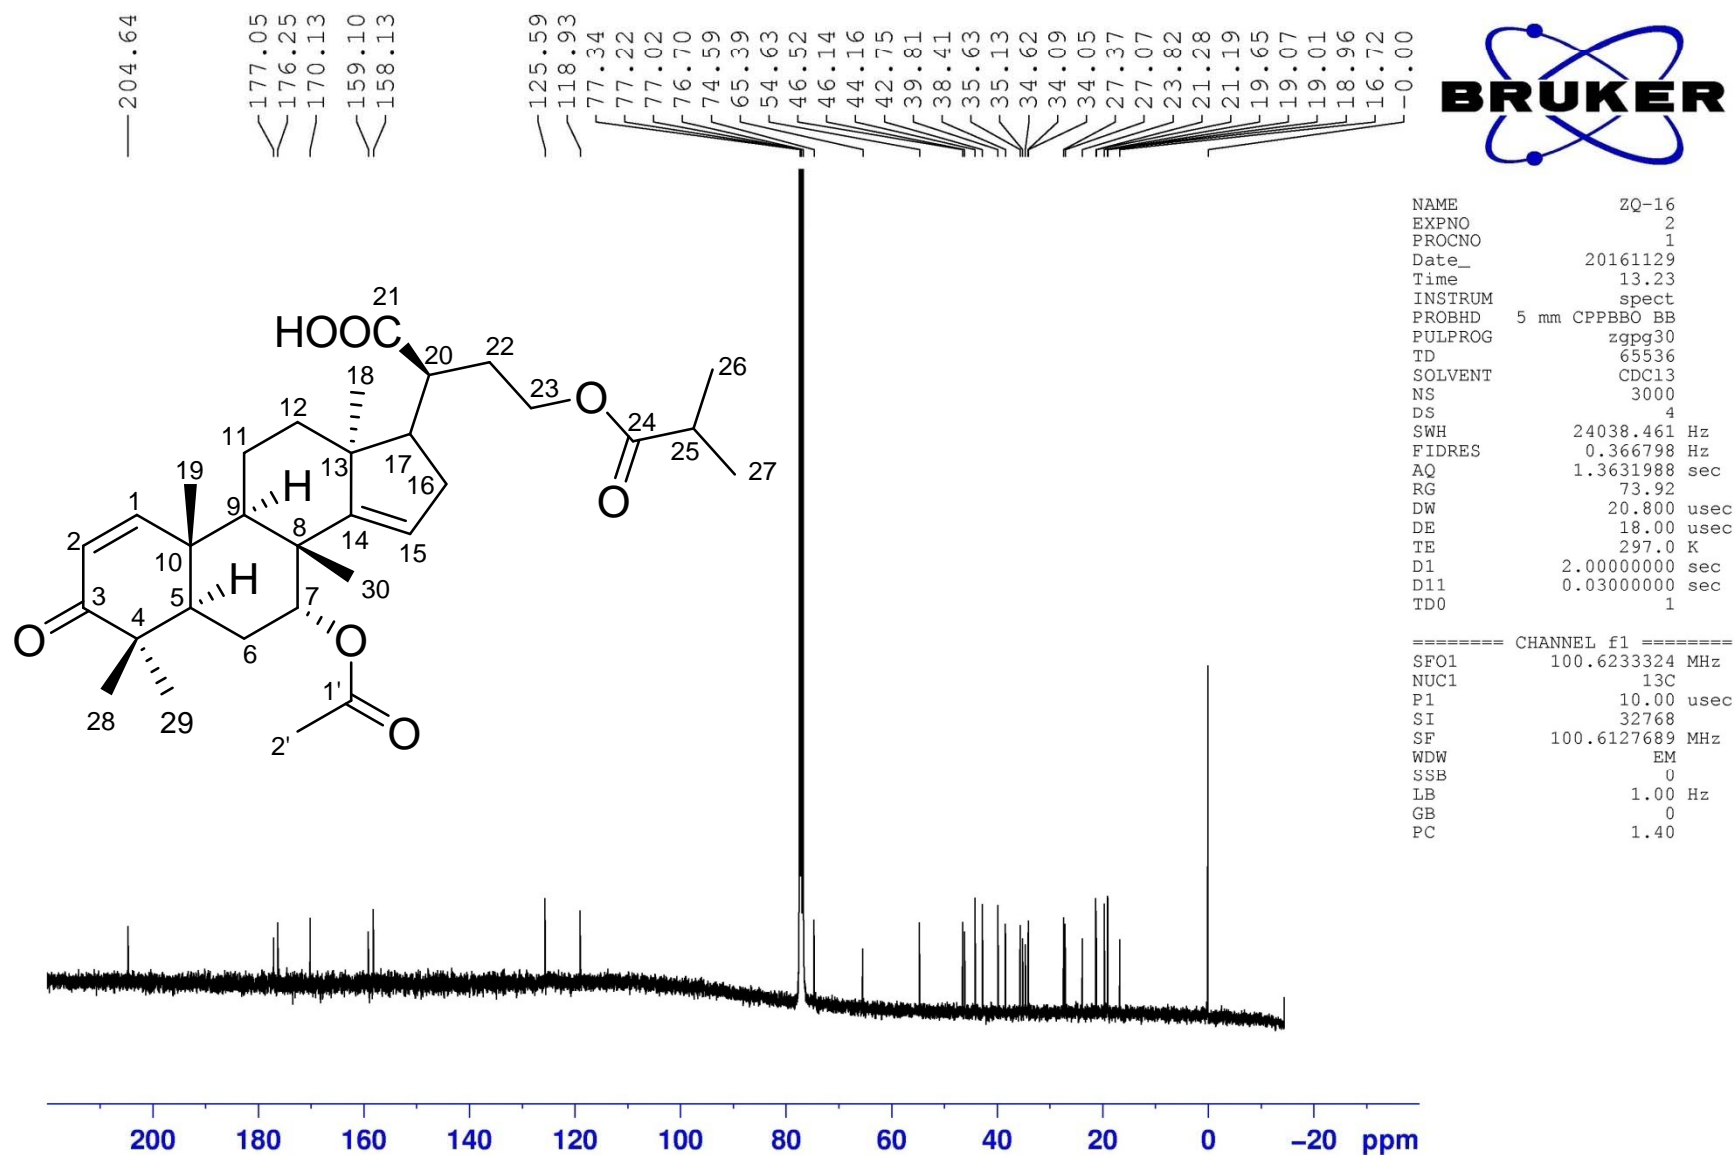

Chemical structure of compound 1 is shown, along with its <sup>13</sup>C NMR spectrum (CDCl<sub>3</sub>). The structure is a complex polycyclic molecule with a carboxylic acid group (HOOC) and a side chain containing an ester and a carboxylic acid. The <sup>13</sup>C NMR spectrum displays peaks corresponding to the structure, with the following chemical shifts (ppm) labeled above the peaks:

| Peak Label | Chemical Shift (ppm) |
|------------|----------------------|
| C-15       | 118.93               |
| C-2        | 125.59               |
| C-14       | 158.13               |
| C-1'       | 170.13               |
| C-21       | 176.25               |
| C-24       | 177.05               |
| C-3        | 204.64               |

The chemical structure of compound 1 is shown, featuring a complex polycyclic core with a carboxylic acid group (HOOC) and a side chain containing an ester and a carboxylic acid. The <sup>13</sup>C NMR spectrum (CDCl<sub>3</sub>) displays peaks corresponding to the structure, with the following chemical shifts (ppm) labeled above the peaks:

- C-15: 118.93
- C-2: 125.59
- C-14: 158.13
- C-1': 170.13
- C-21: 176.25
- C-24: 177.05
- C-3: 204.64

DEPT135 (100 MHz) spectrum of compound **10** in CDCl<sub>3</sub>

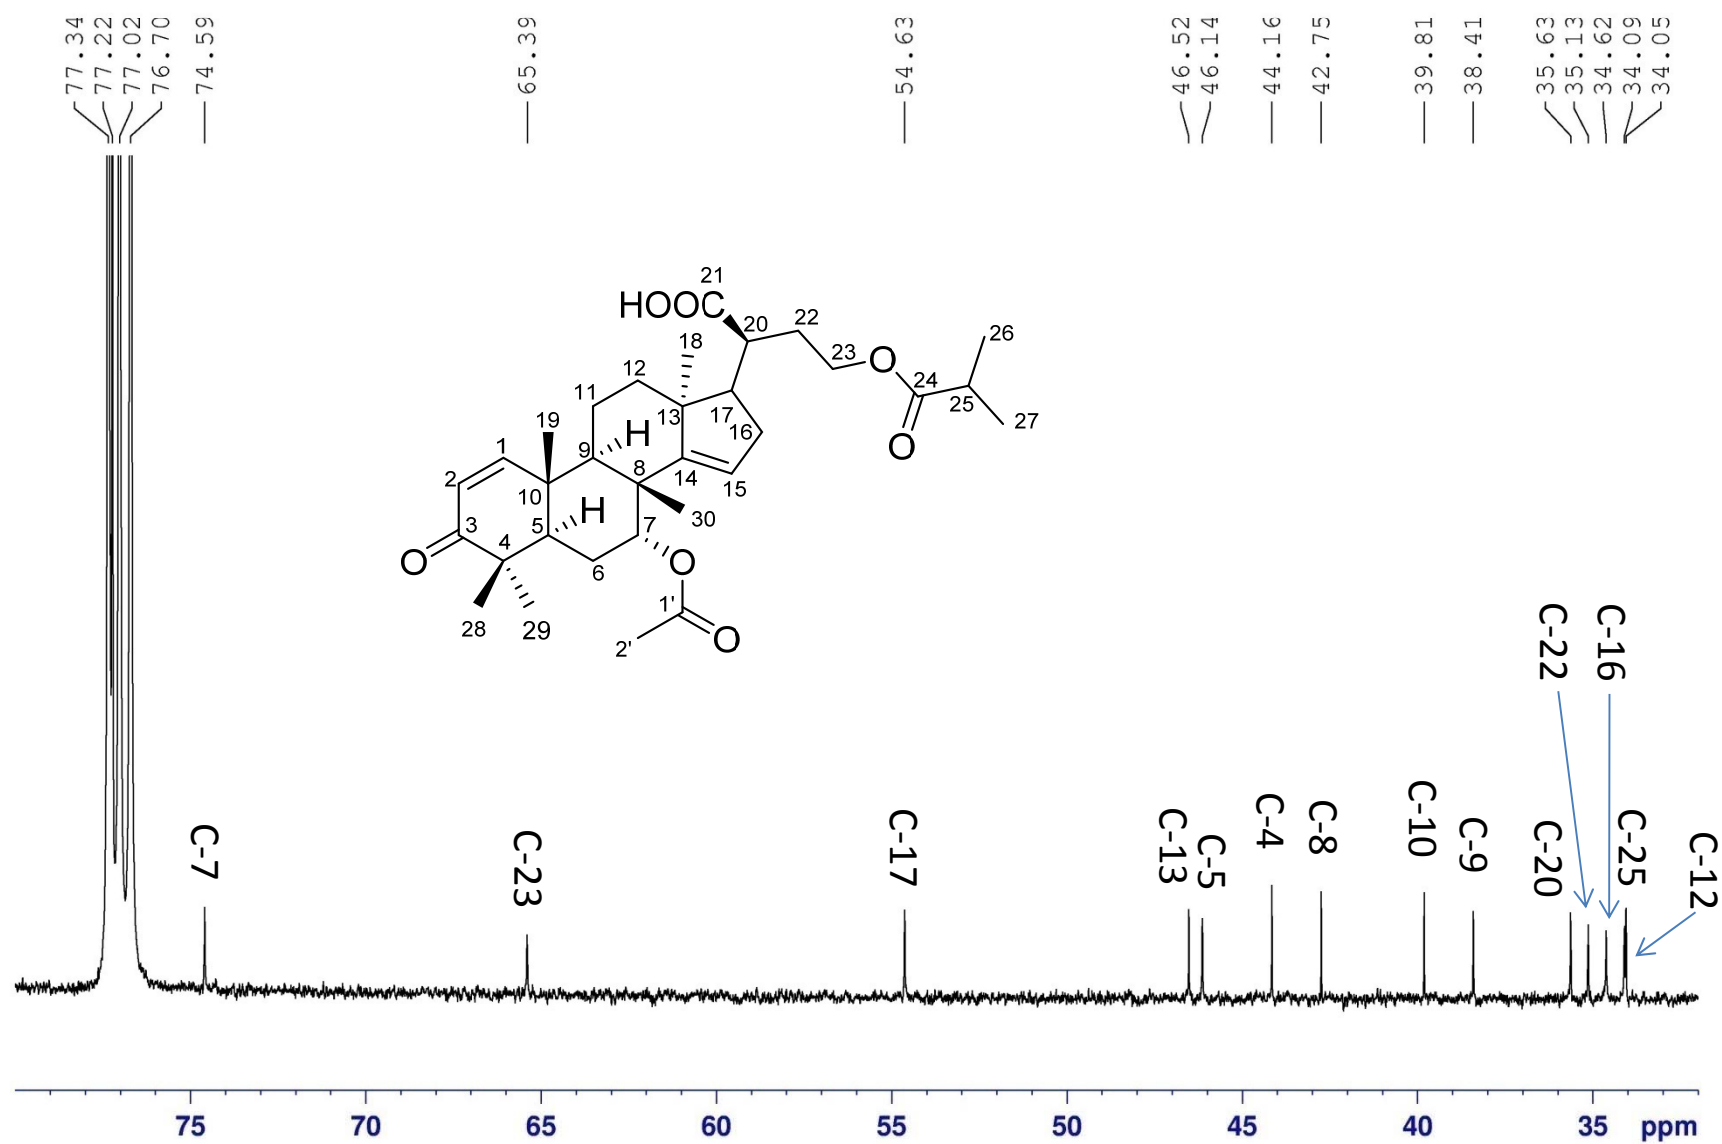

DEPT135 (100 MHz) spectrum of compound **10** in CDCl<sub>3</sub>

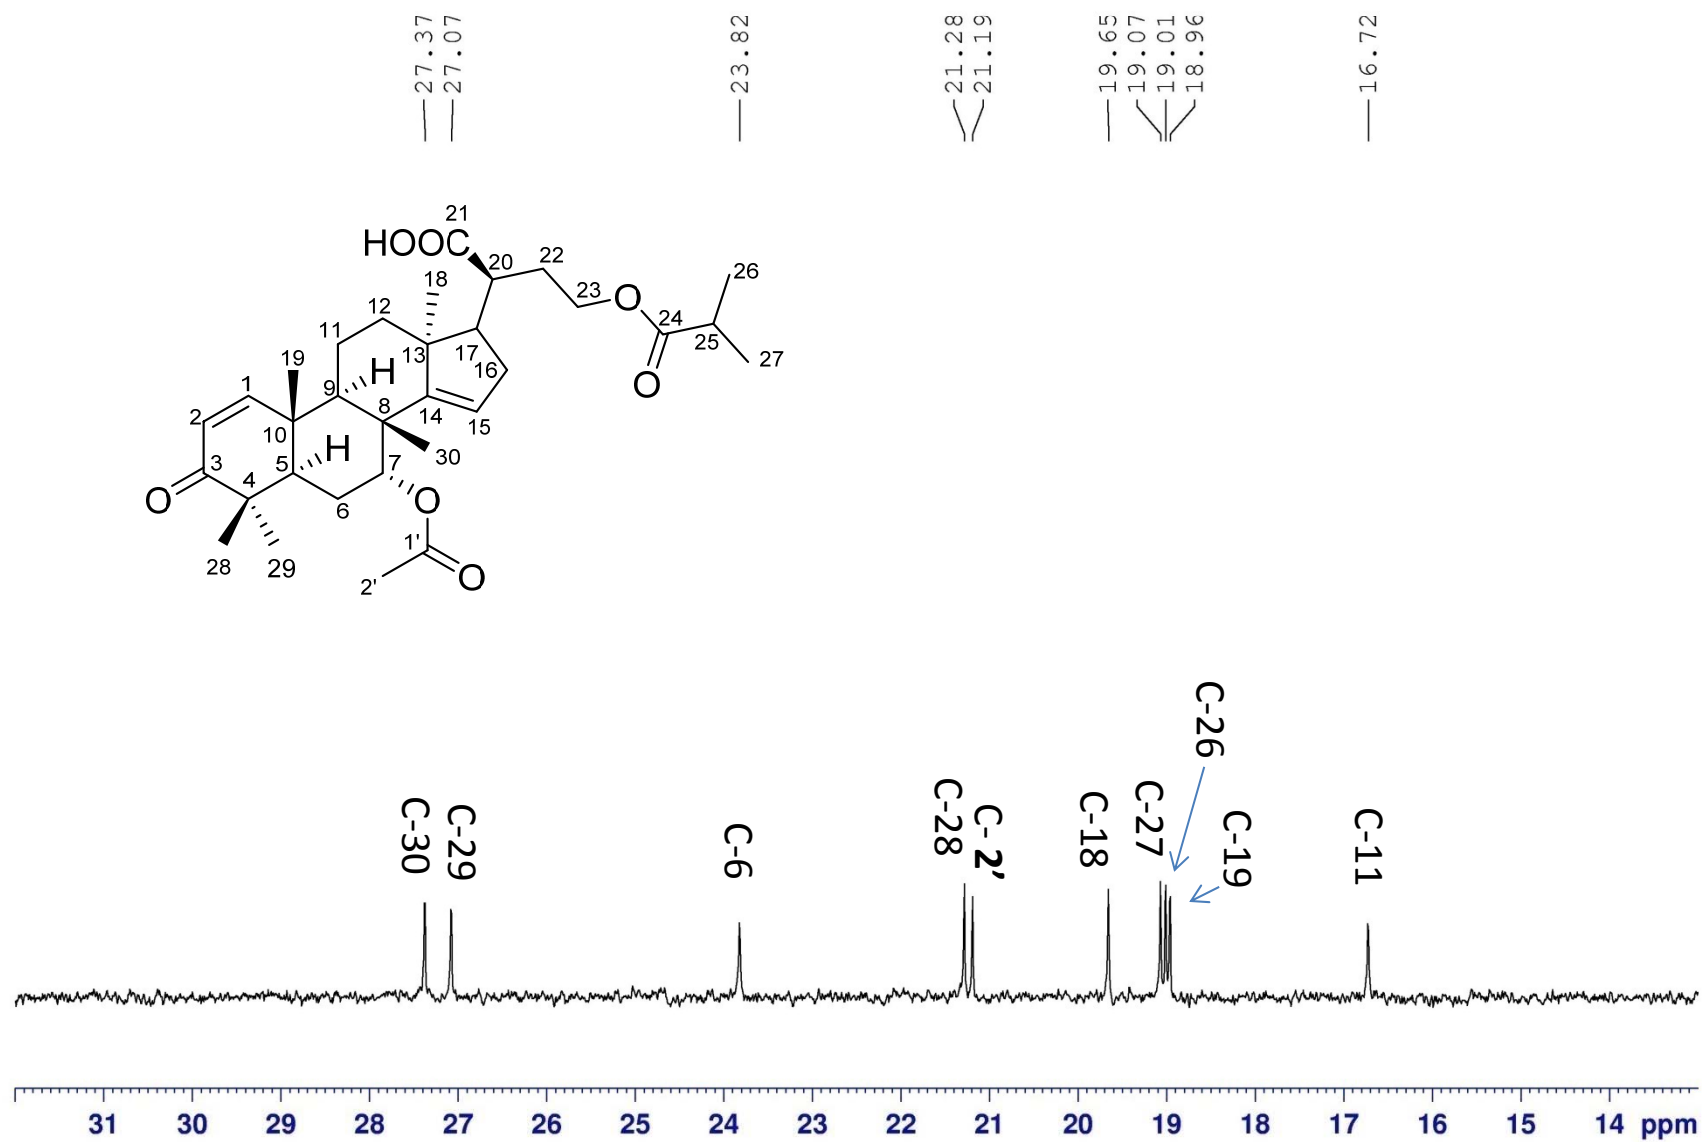



# DEPT135 (100 MHz) spectrum of compound **10** in CDCl<sub>3</sub>

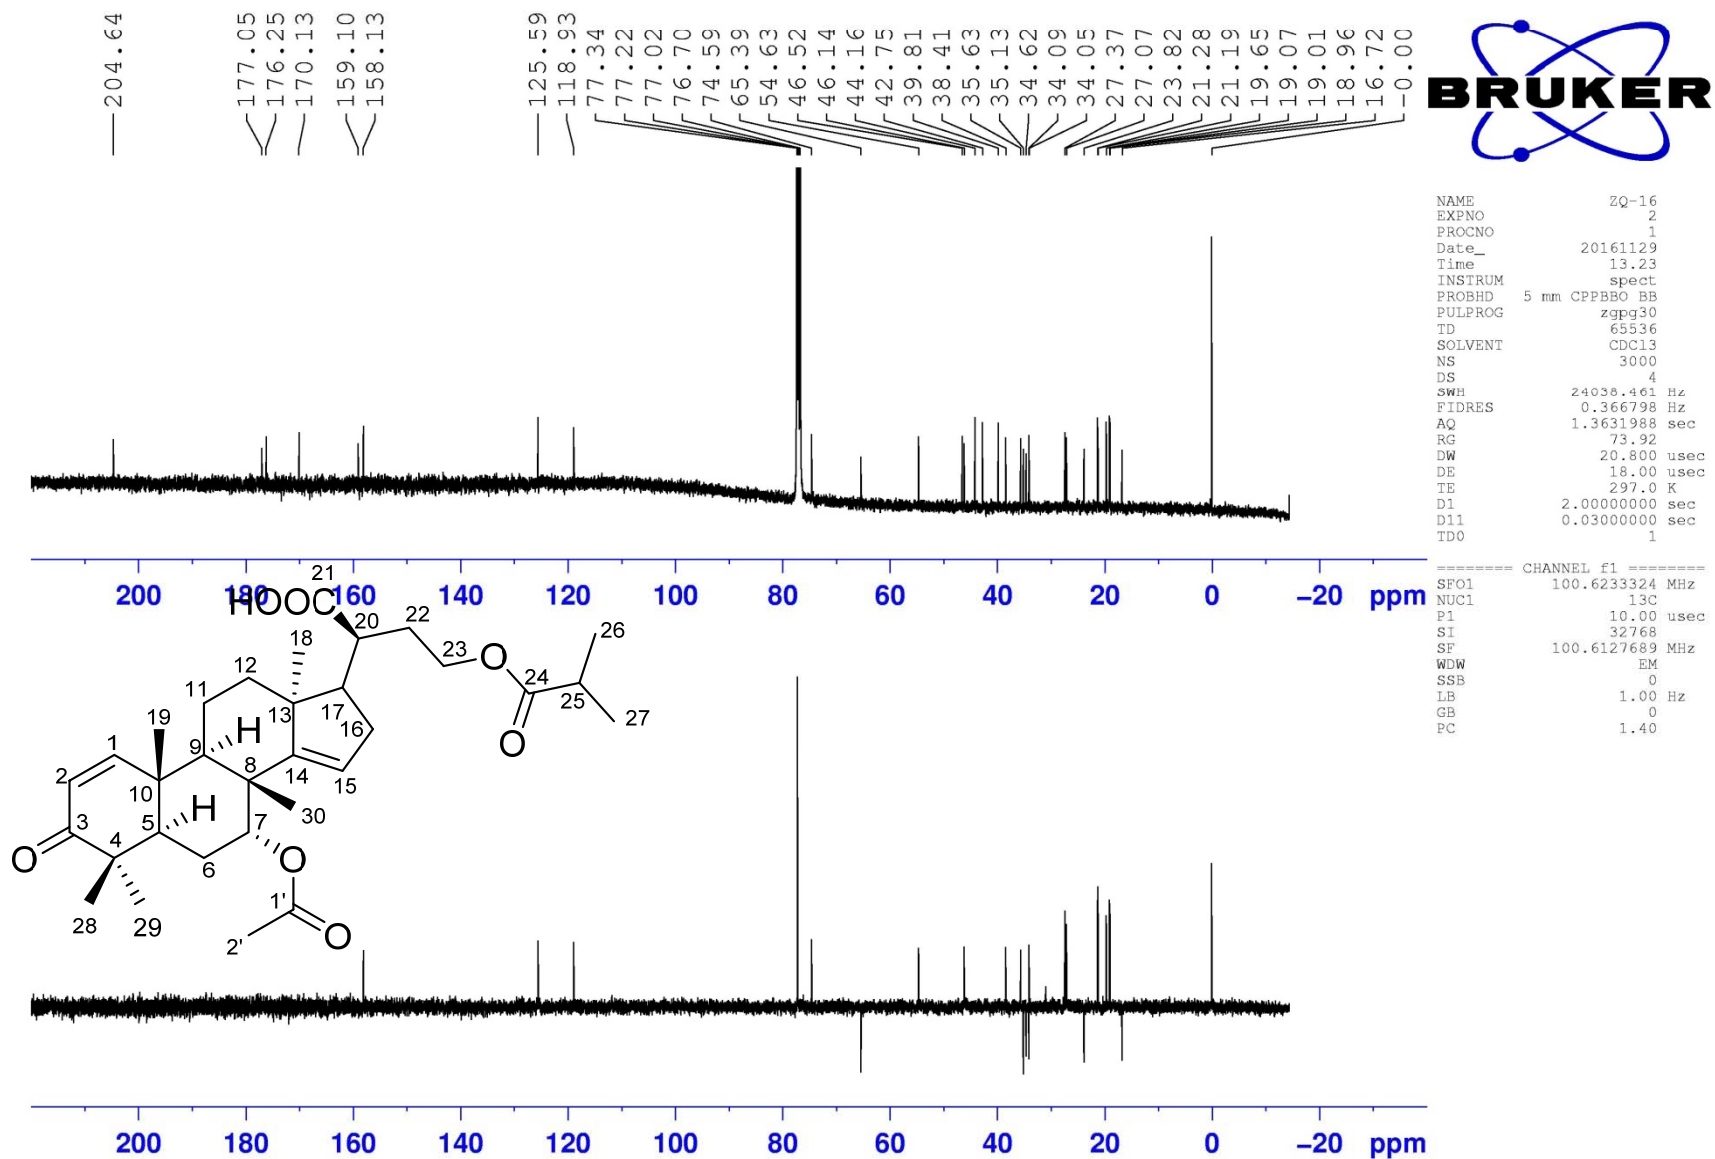

DEPT135 (100 MHz) spectrum of compound **10** in CDCl<sub>3</sub>

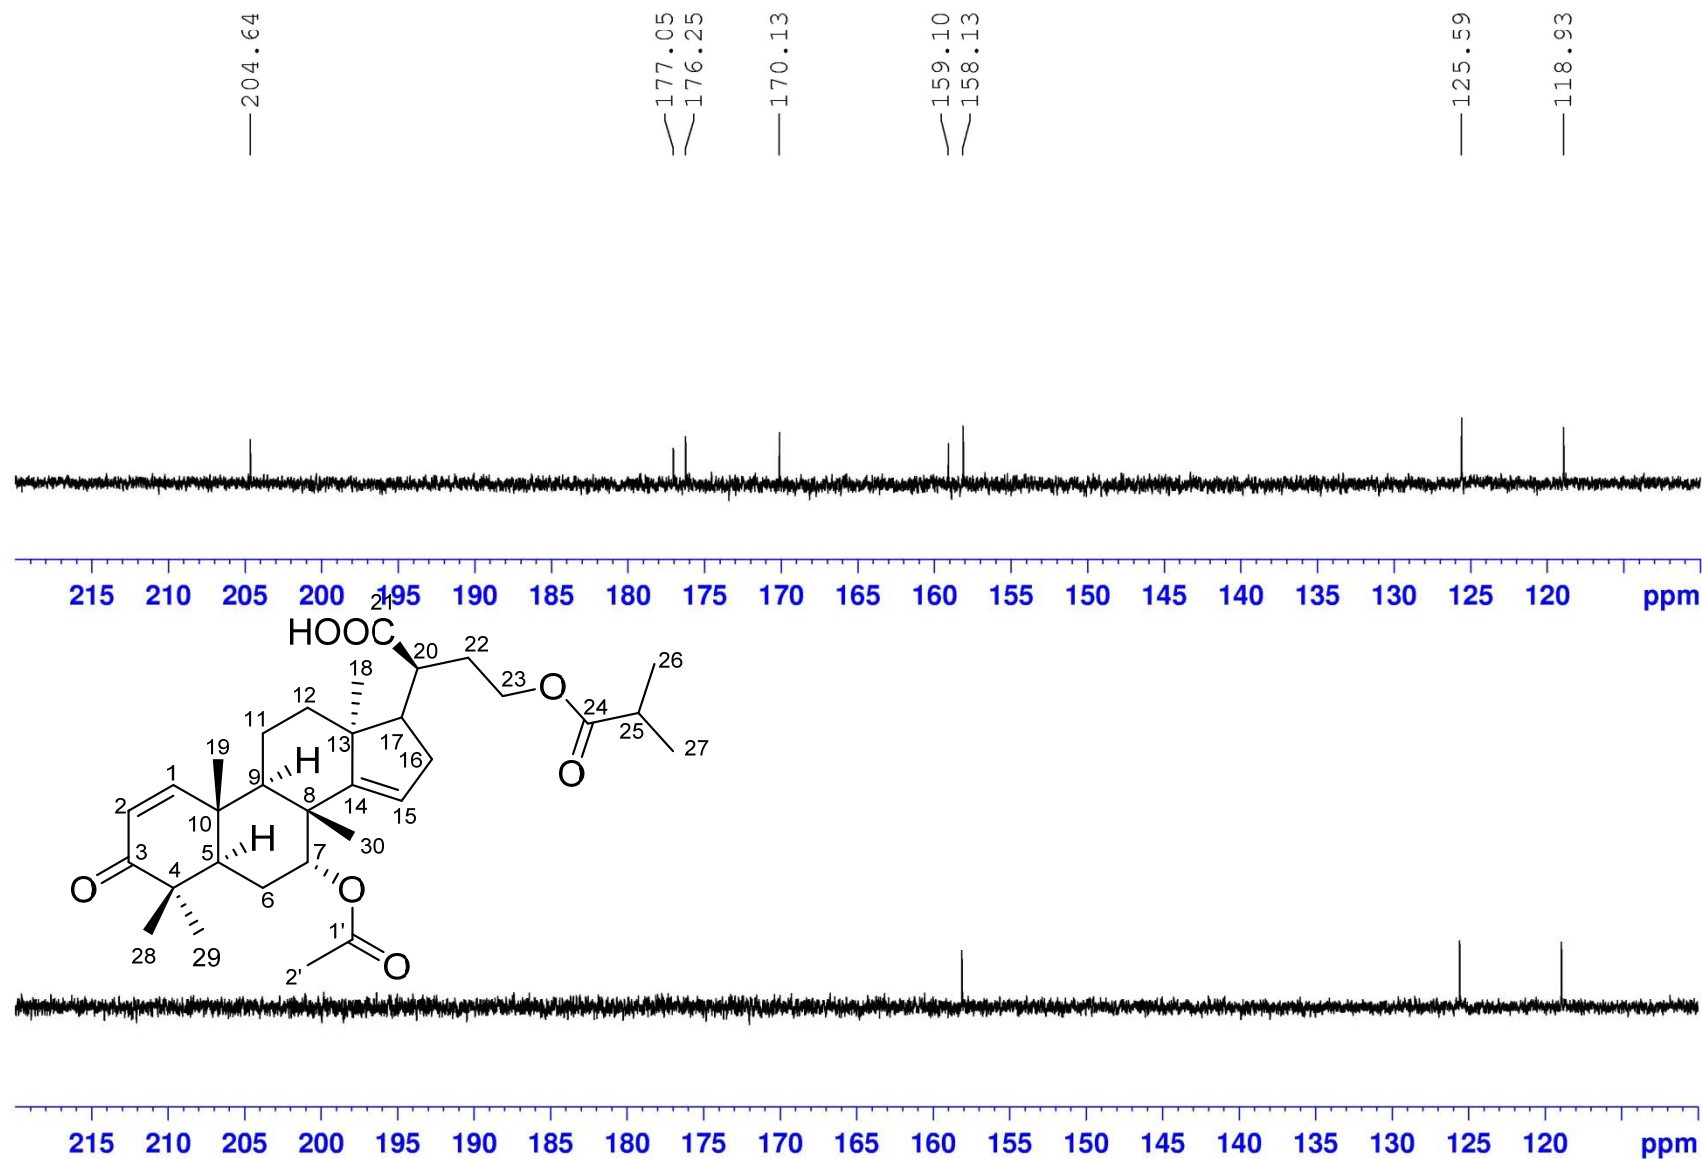

DEPT135 (100 MHz) spectrum of compound **10** in  $\text{CDCl}_3$

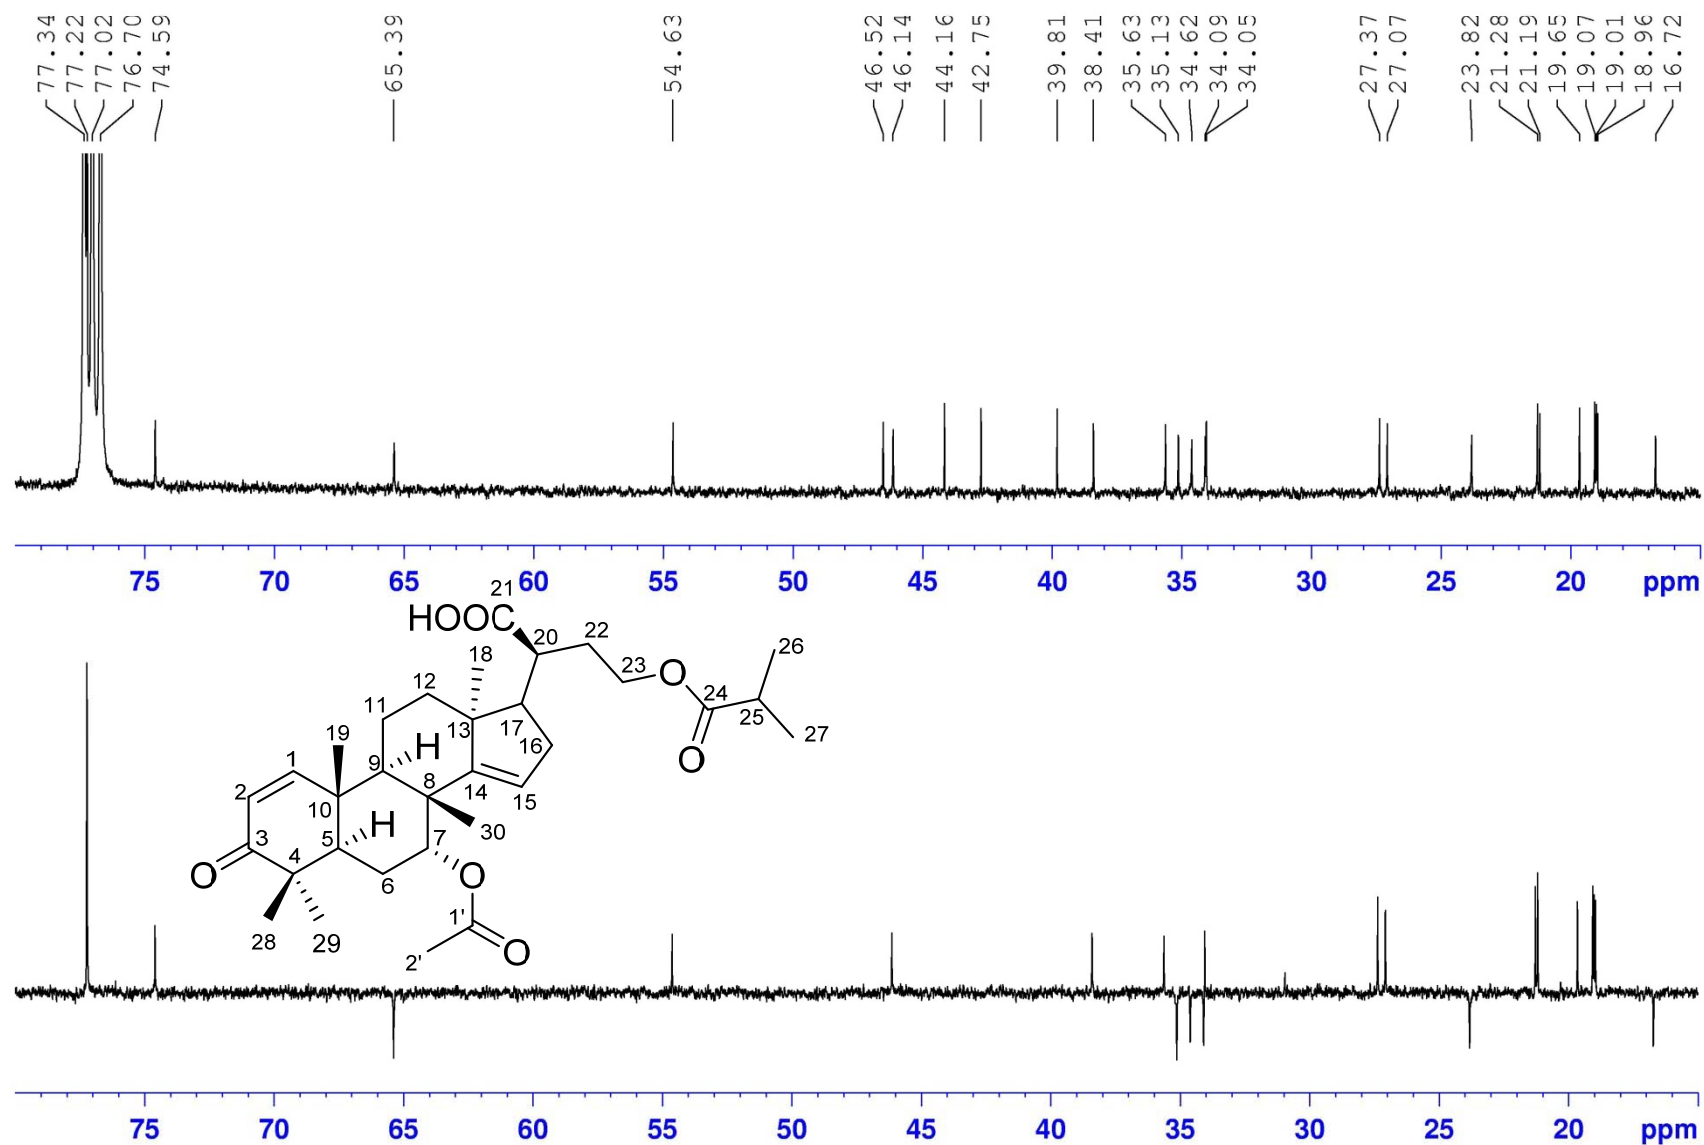

$^1\text{H}$ - $^1\text{H}$  COSY (400 MHz) spectrum of compound **10** in  $\text{CDCl}_3$

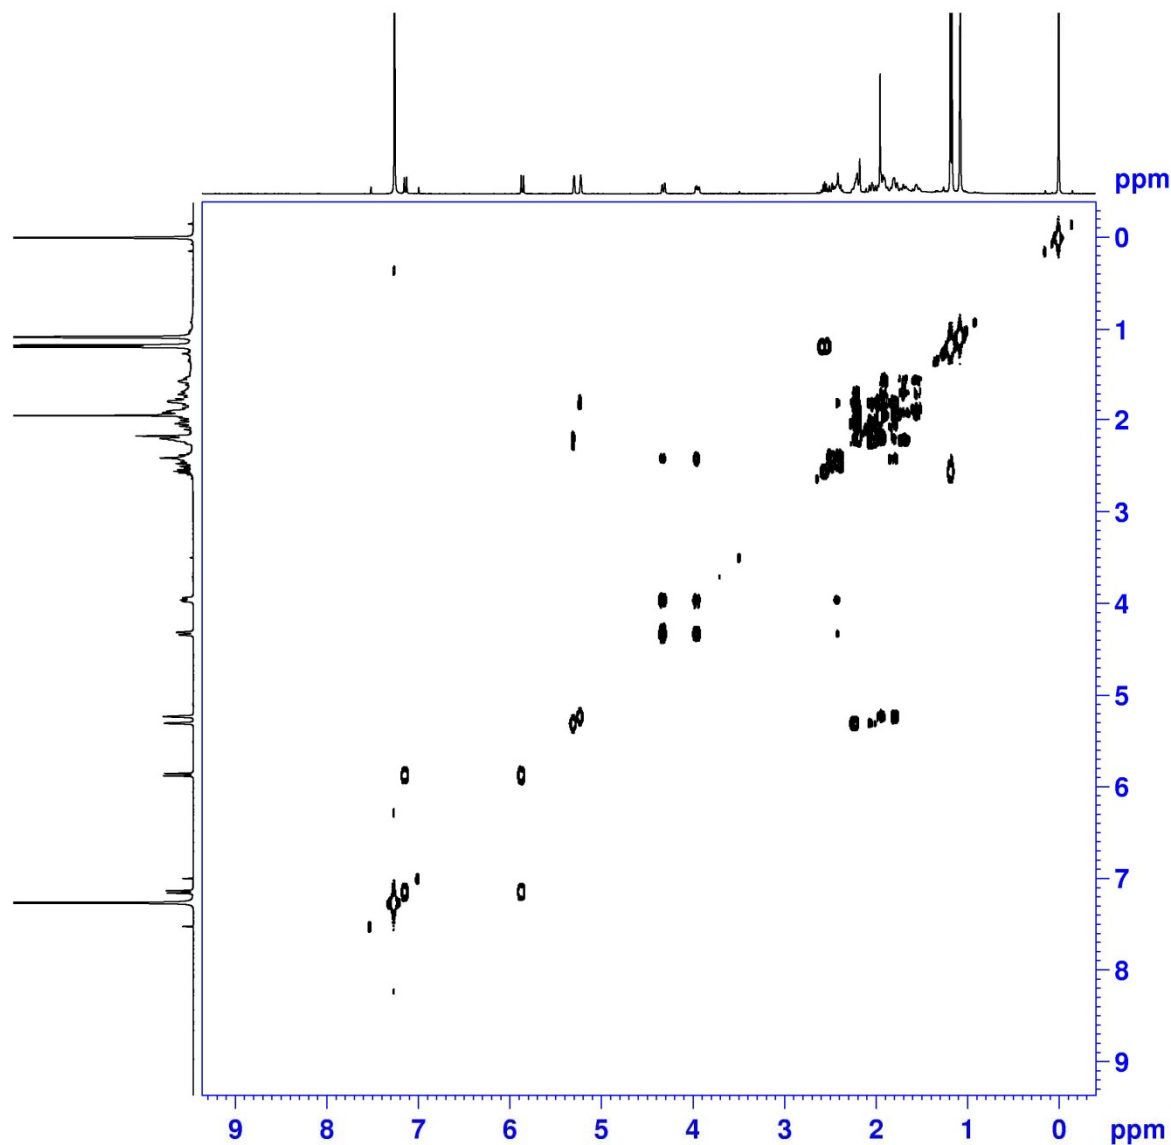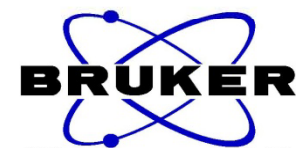

```

NAME           ZQ-16
EXPNO           4
PROCNO          1
Date_          20161203
Time            8.34
INSTRUM         spect
PROBHD          5 mm CPPBBO BB
PULPROG         cosygpppqf
TD              2048
SOLVENT         CDCl3
NS               8
DS               8
SWH             3906.250 Hz
FIDRES          1.907349 Hz
AQ              0.2621940 sec
RG              208.5
DW              128.000 usec
DE              10.00 usec
TE              297.0 K
D0              0.00000300 sec
D1              1.89678097 sec
D11             0.03000000 sec
D12             0.00002000 sec
D13             0.00000400 sec
D16             0.00020000 sec
IN0             0.00025600 sec
  
```

```

===== CHANNEL f1 =====
SFO1          400.1318006 MHz
NUC1           1H
P0             11.50 usec
P1             11.50 usec
P17           2500.00 usec
ND0            1
TD             128
SFO1          400.1318 MHz
FIDRES        30.517578 Hz
SW             9.762 ppm
FnMODE         QF
SI             1024
SF            400.1300074 MHz
WDW            QSINE
SSB            0
LB             0.00 Hz
GB            0
PC             1.40
SI             1024
MC2            QF
SF            400.1300054 MHz
WDW            QSINE
SSB            0
LB             0.00 Hz
  
```

$^1\text{H}$ - $^1\text{H}$  COSY (400 MHz) spectrum of compound **10** in  $\text{CDCl}_3$

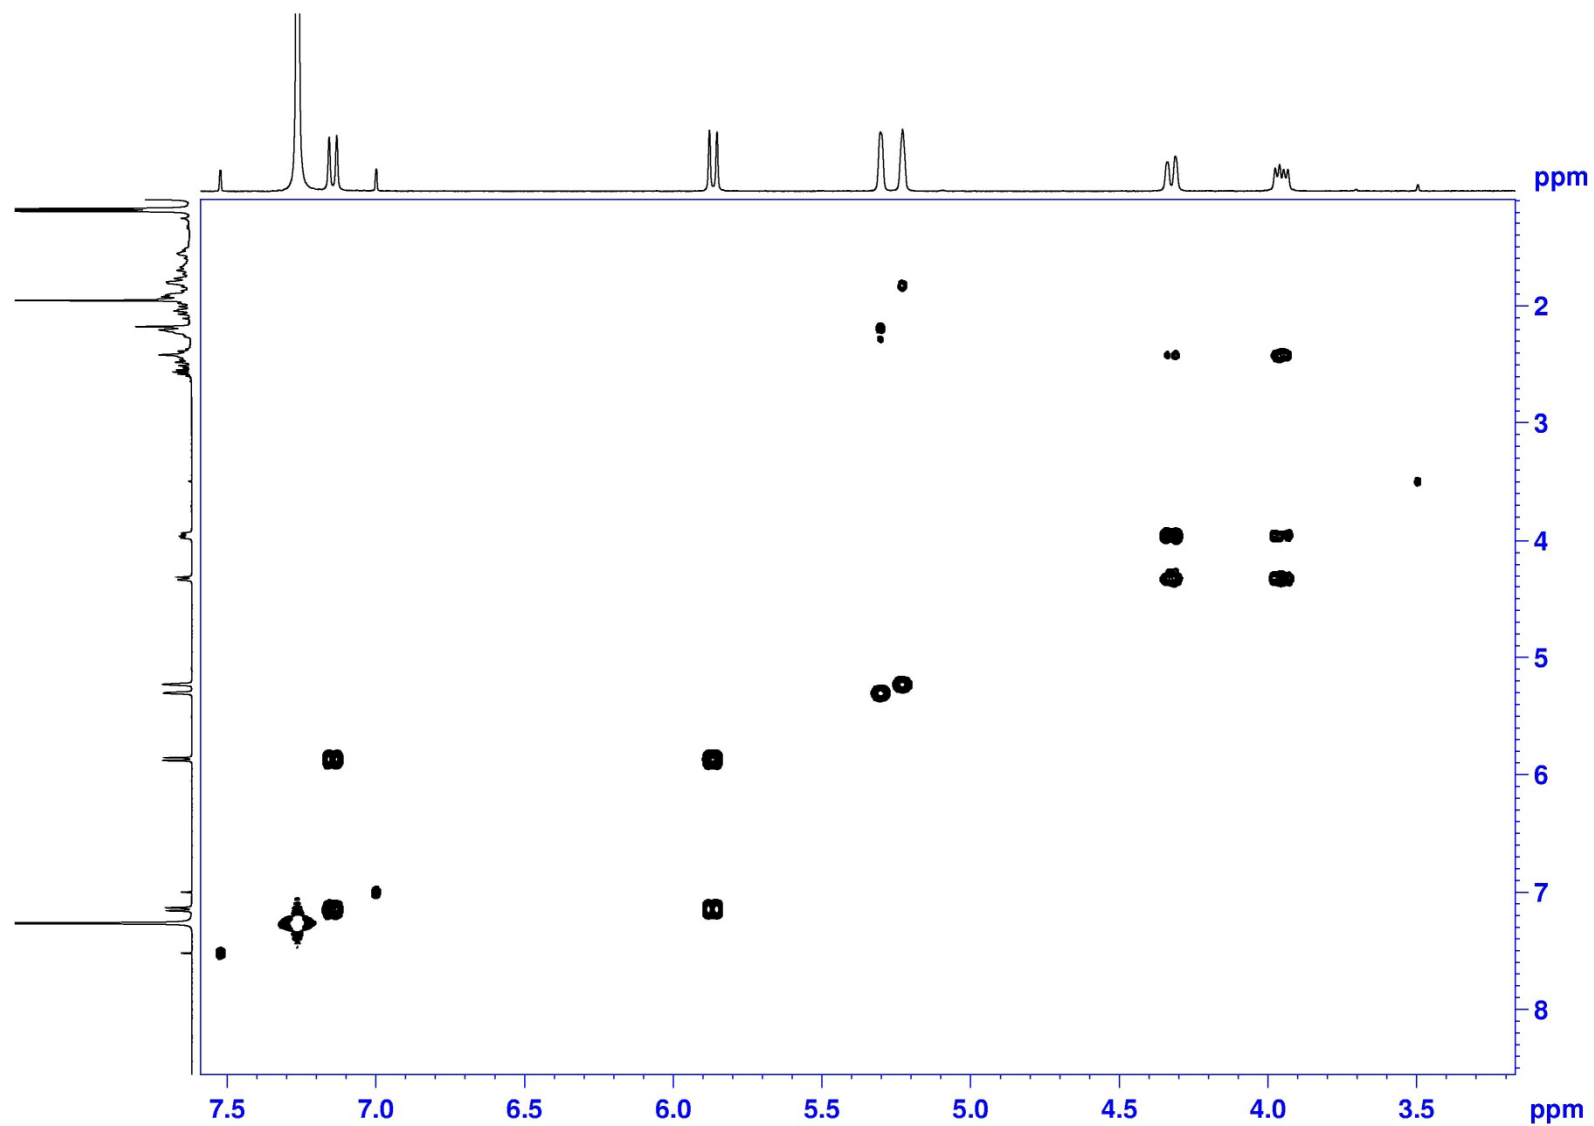

<sup>1</sup>H-<sup>1</sup>H COSY (400 MHz) spectrum of compound **10** in CDCl<sub>3</sub>

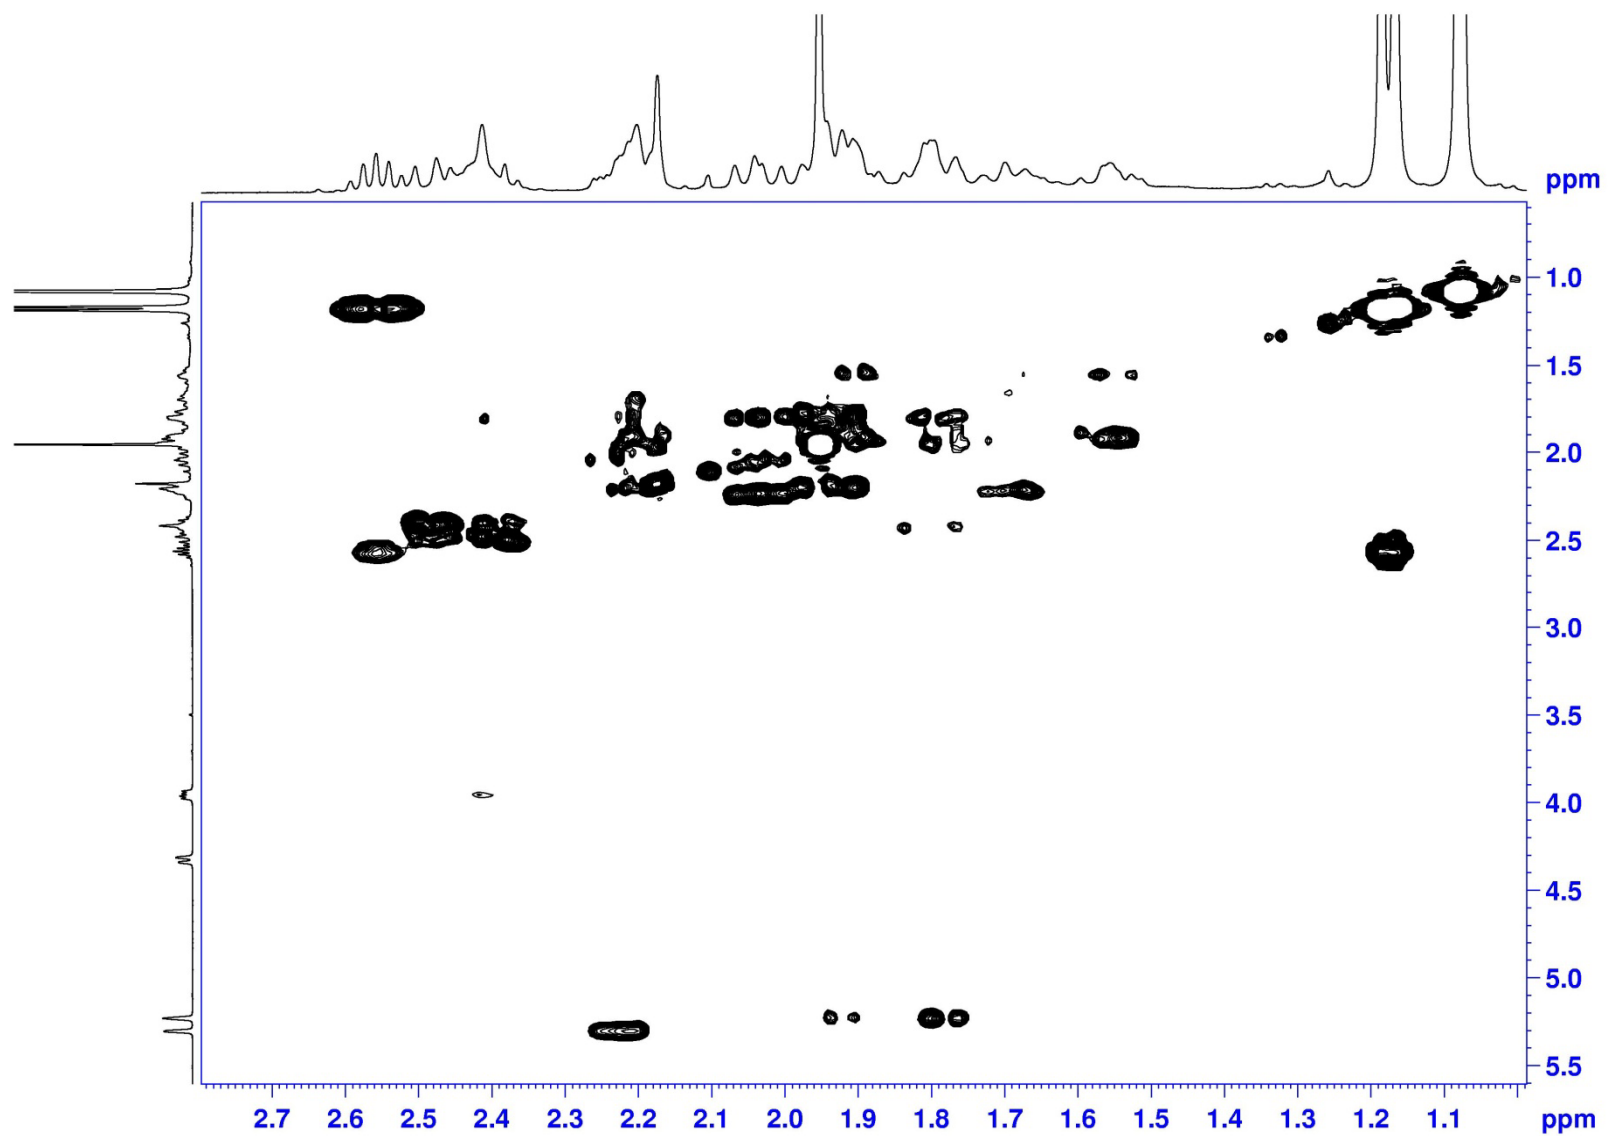

# HSQC (400 MHz) spectrum of compound **10** in CDCl<sub>3</sub>

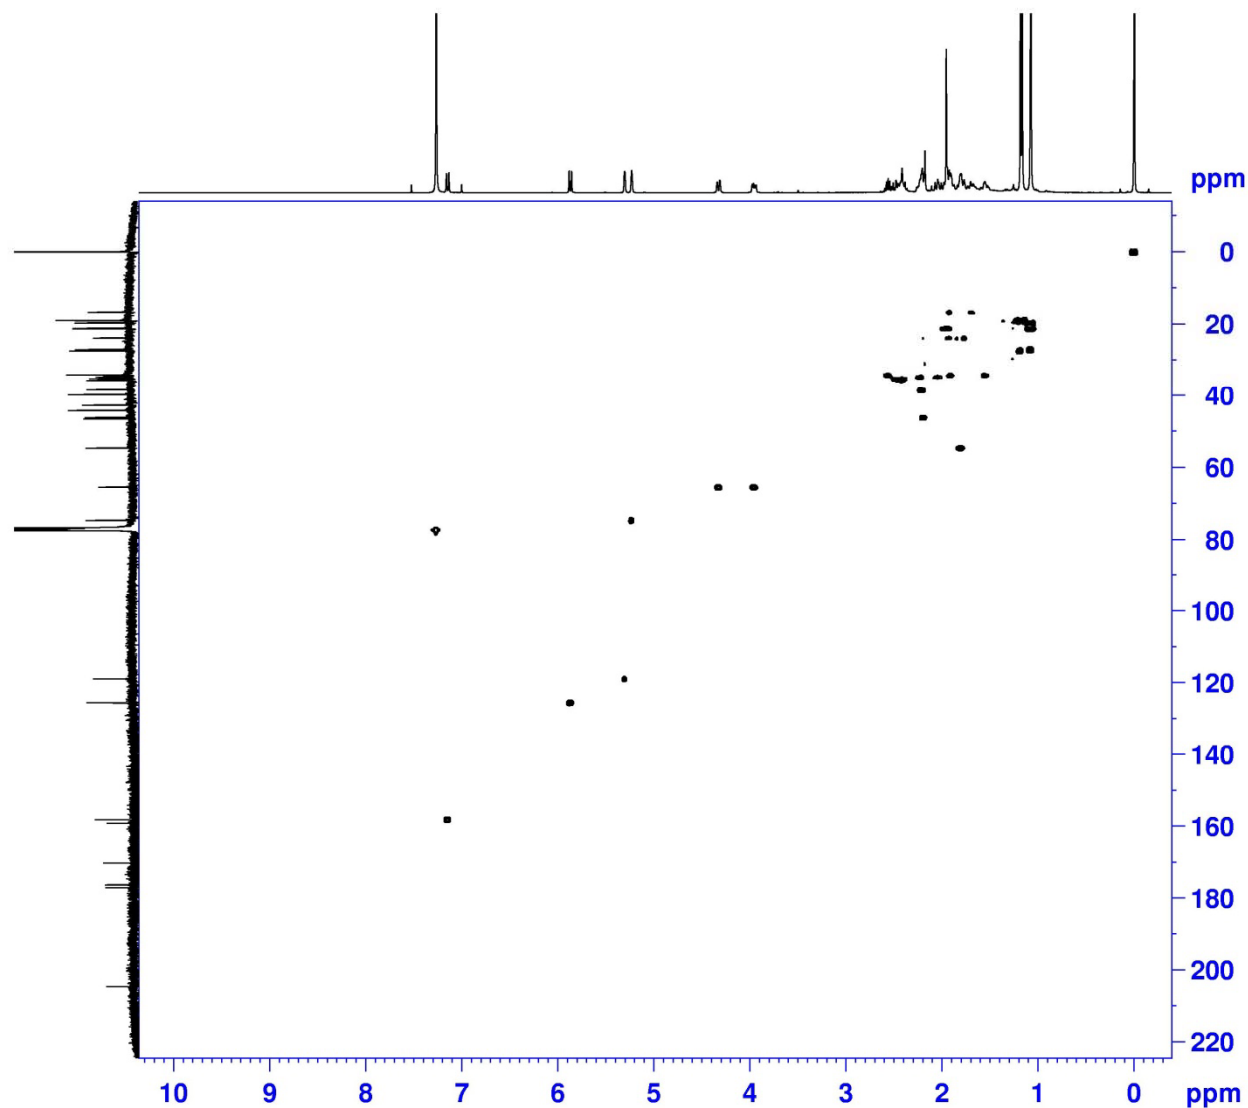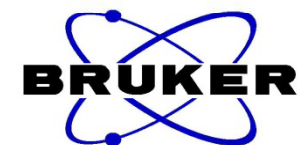

```

NAME           ZQ-16
EXPNO           5
PROCNO          1
Date_          20161203
Time            9.13
INSTRUM         spect
PROBHD          5 mm CPPBBO BB
PULPROG         hsqcetgpsi2
TD             1024
SOLVENT         CDCl3
NS              16
DS              16
SWH             4302.926 Hz
FIDRES          4.202076 Hz
AQ              0.1190388 sec
RG              208.5
DW              116.200 usec
DE              10.00 usec
TE              297.0 K
CNST2          145.0000000
D0              0.00000300 sec
D1              1.46497905 sec
D4              0.00172414 sec
D11             0.03000000 sec
D16             0.00020000 sec
D24             0.00086207 sec
IN0             0.00002080 sec
ZGPTNS
    
```

```

===== CHANNEL f1 =====
SF01          400.1320007 MHz
NUC1           1H
P1             11.50 usec
P2             23.00 usec
P28            0.00 usec
ND0            2
TD             256
SF01          100.6233 MHz
FIDRES         93.900238 Hz
SW             238.896 ppm
FnMODE         Echo-Antiecho
SI             1024
SF             400.1300066 MHz
WDW            QSINE
SSB            2
LB             0.00 Hz
GB             0
PC             1.40
SI             1024
MC2            echo-antiecho
SF             100.6127567 MHz
WDW            QSINE
    
```

HSQC (400 MHz) spectrum of compound **10** in CDCl<sub>3</sub>

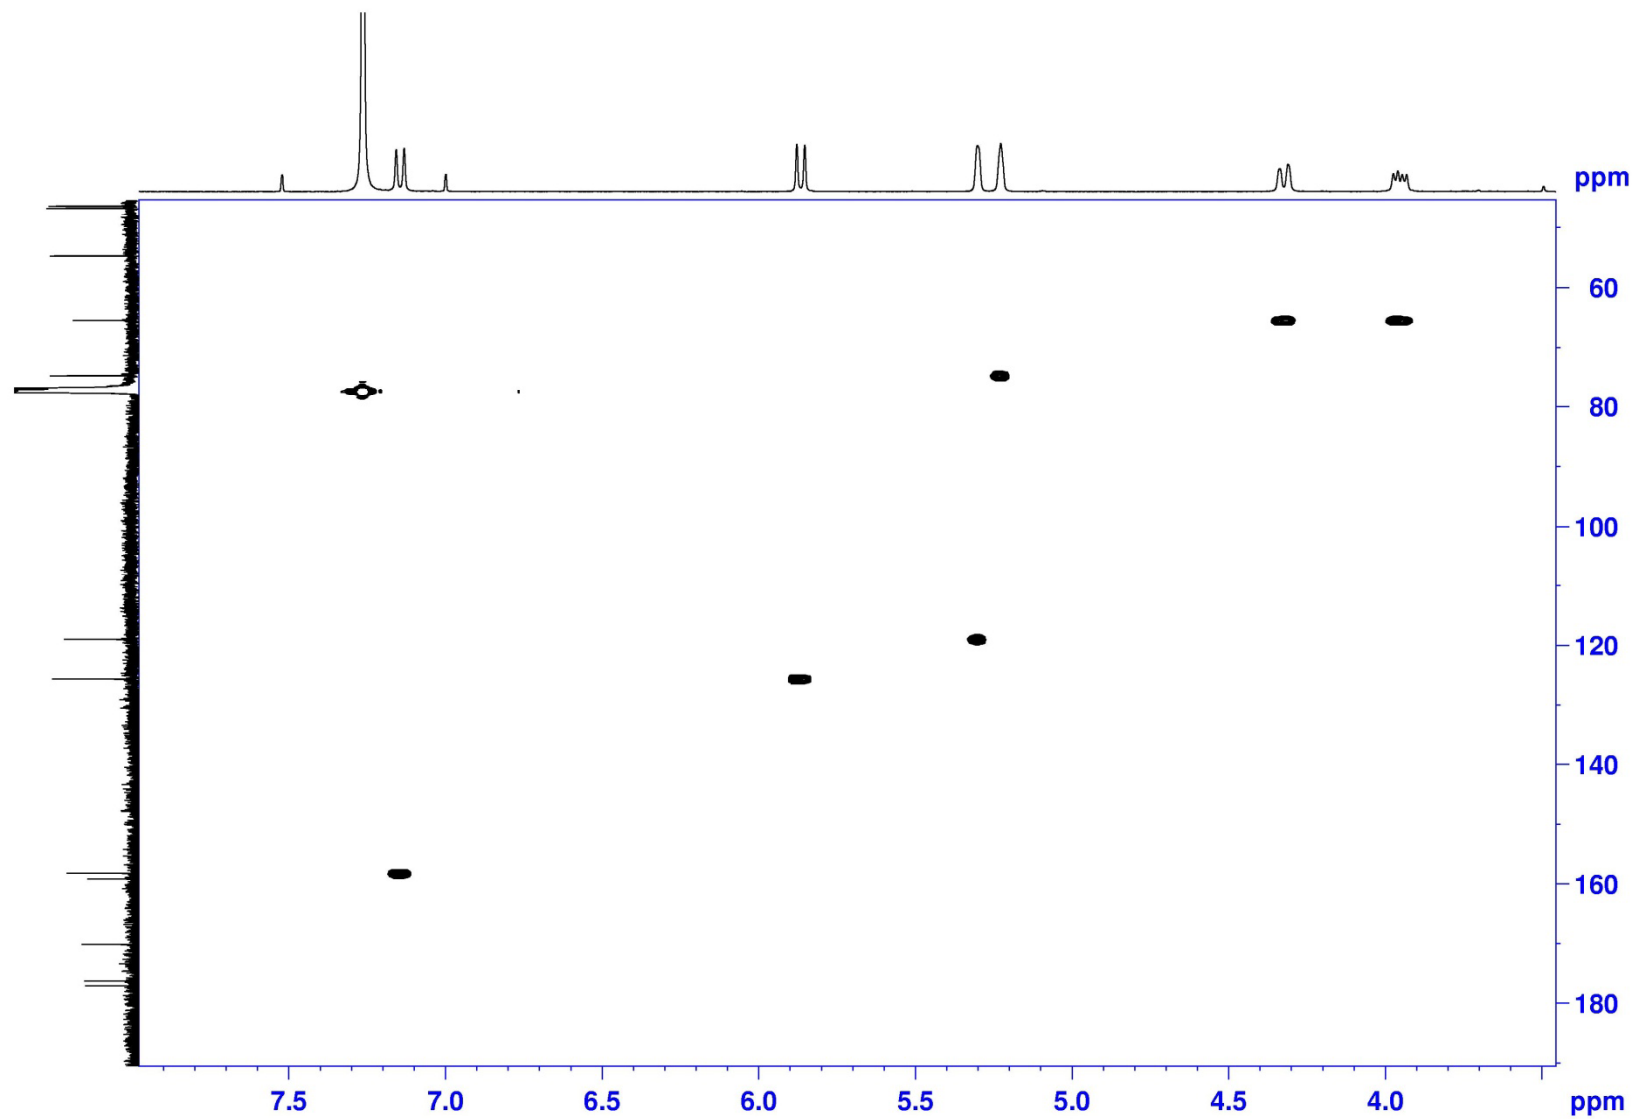



HSQC (400 MHz) spectrum of compound **10** in CDCl<sub>3</sub>

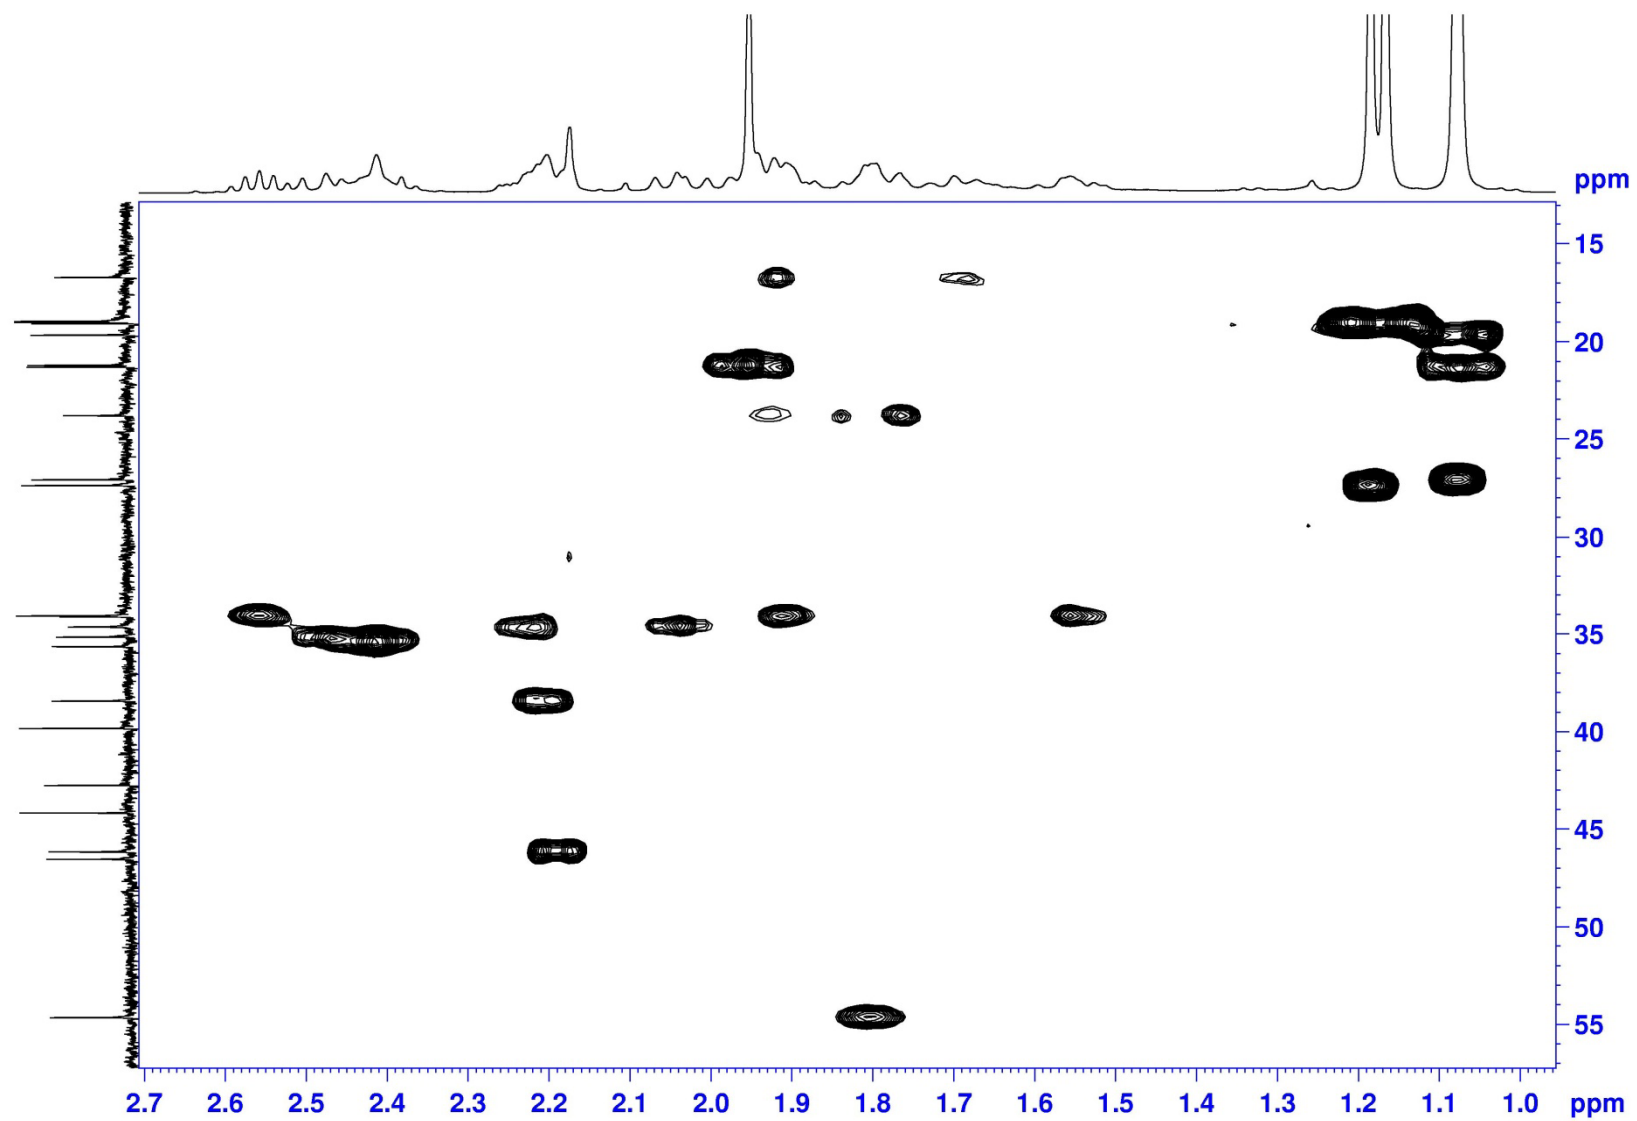

# HMBC (400 MHz) spectrum of compound **10** in CDCl<sub>3</sub>

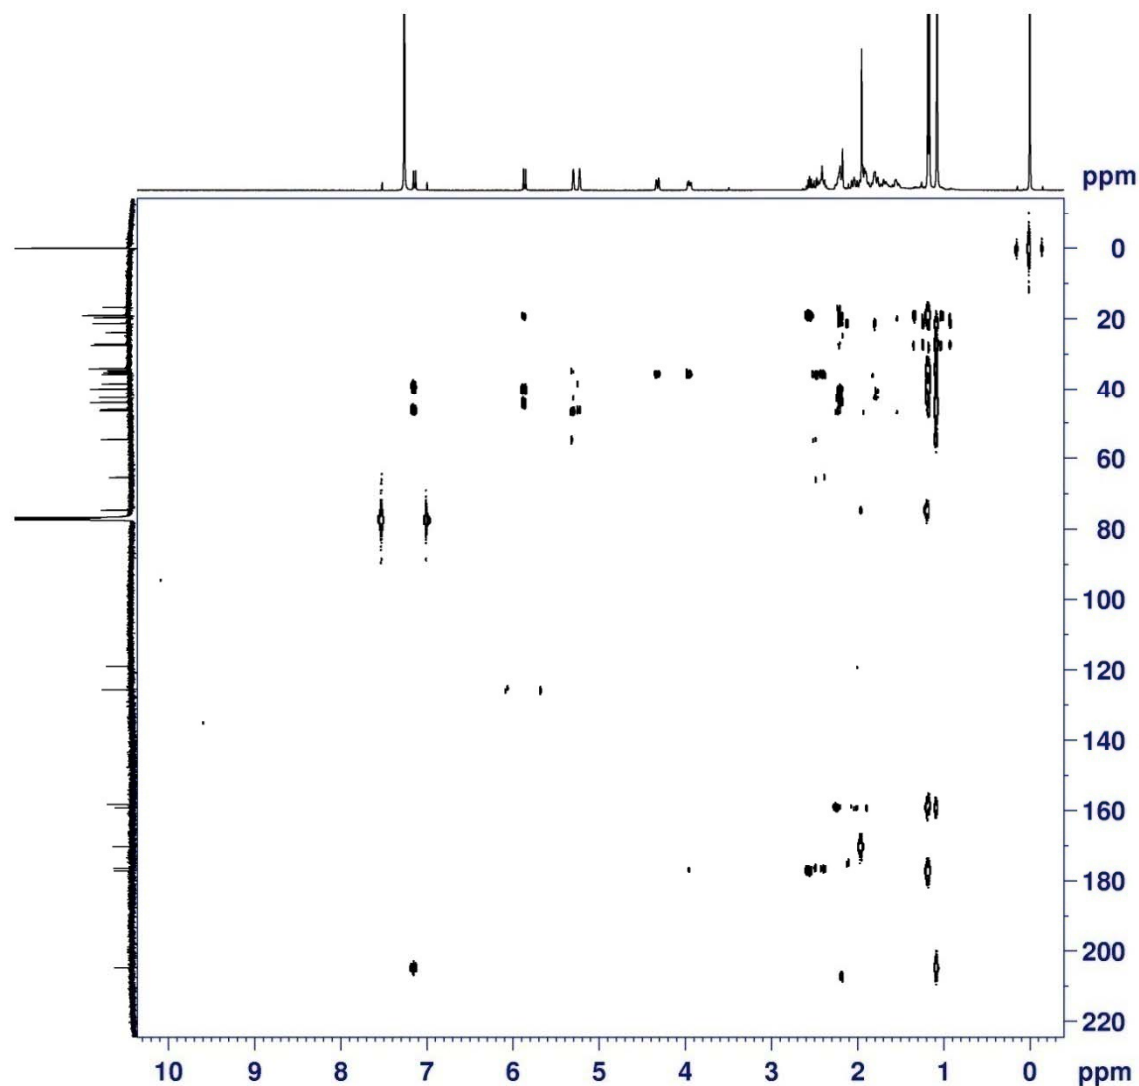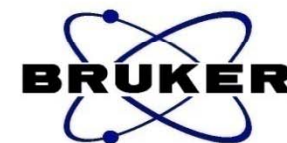

```

NAME          ZQ-16
EXPNO         6
PROCNO        1
Date_         20161203
Time          11.04
INSTRUM       spect
PROBHD        5 mm CPPBBO BB
PULPROG       hmbcgp1pndqf
TD            4096
SOLVENT       CDC13
NS            32
DS            16
SWH           5197.505 Hz
FIDRES        1.268922 Hz
AQ            0.3940852 sec
RG            208.5
DW            96.200 usec
DE            10.00 usec
TE            297.0 K
CNST2         145.0000000
CNST13        10.0000000
D0            0.00000300 sec
D1            1.50000000 sec
D2            0.00344828 sec
D6            0.05000000 sec
D16           0.00020000 sec
IN0           0.00002080 sec
  
```

```

===== CHANNEL f1 =====
SFO1         400.1323208 MHz
NUC1          1H
P1            11.50 usec
P2            23.00 usec
ND0           2
TD            128
SFO1         100.6233 MHz
FIDRES        187.800476 Hz
SW            238.896 ppm
FnMODE        QF
SI            2048
SF            400.1300076 MHz
WDW           SINE
SSB           0
LB            0.00 Hz
GB            0
PC            1.40
SI            1024
MC2           QF
SF            100.6127600 MHz
WDW           SINE
SSB           0
LB            0.00 Hz
GB            0
  
```

HMBC (400 MHz) spectrum of compound **10** in  $\text{CDCl}_3$

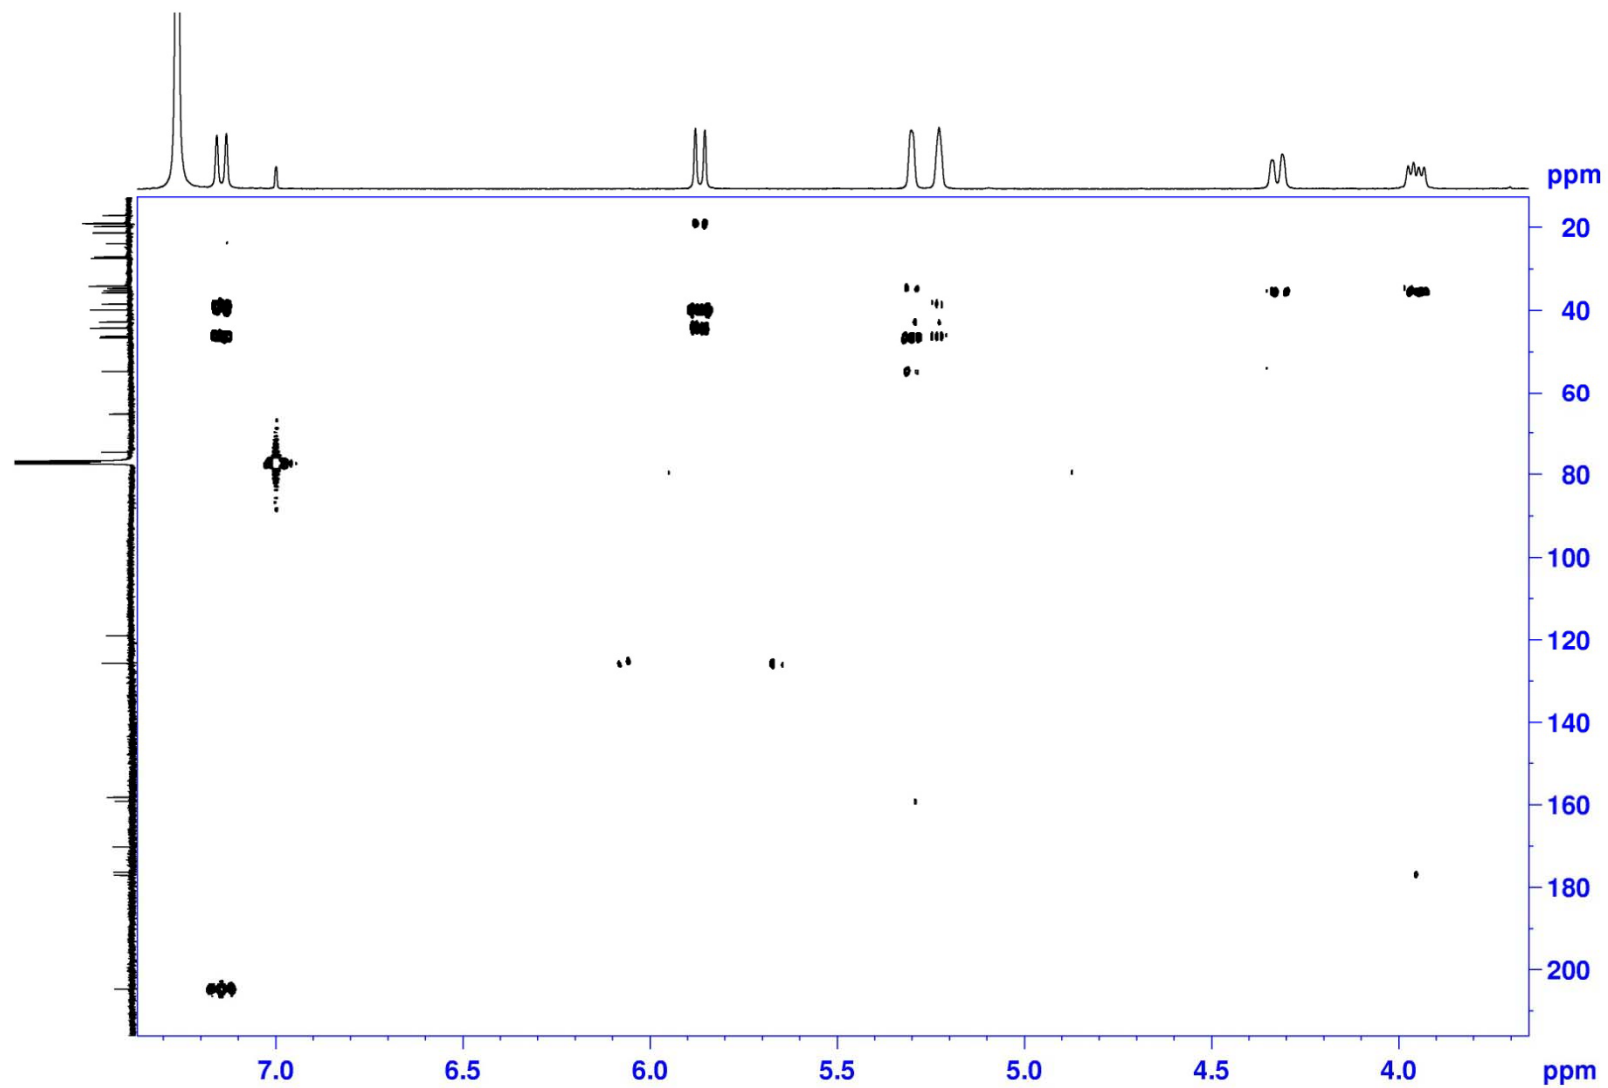

HMBC (400 MHz) spectrum of compound **10** in  $\text{CDCl}_3$

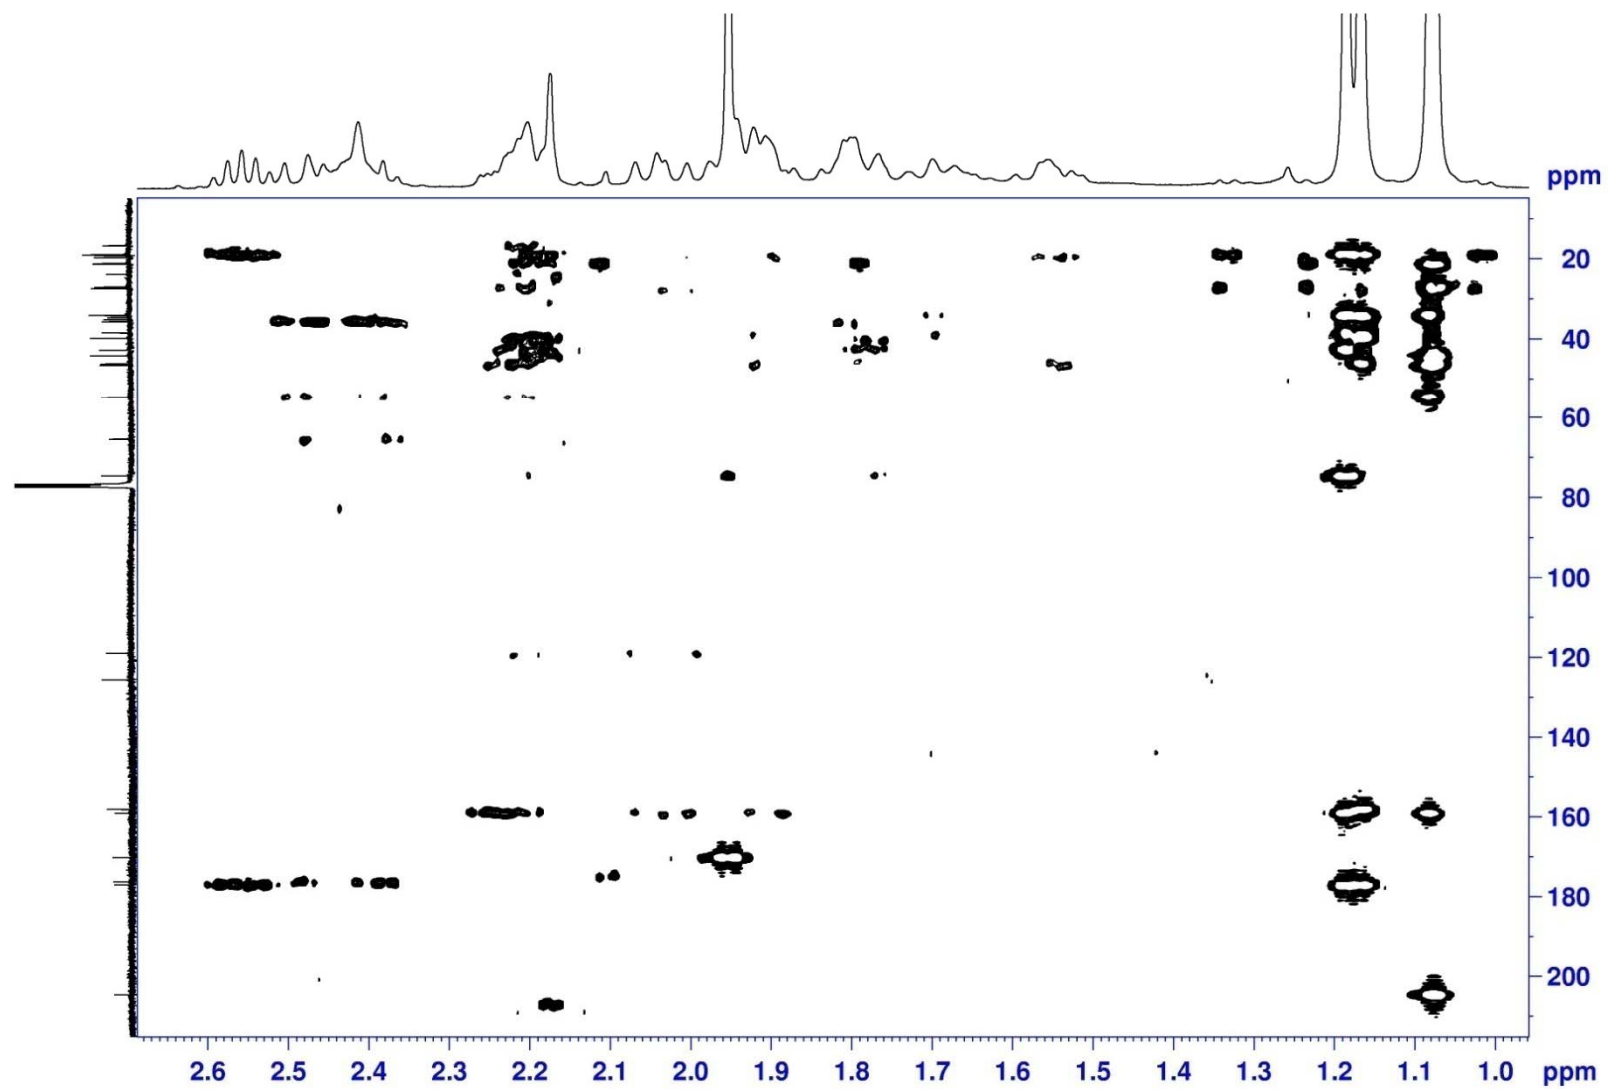

HMBC (400 MHz) spectrum of compound **10** in  $\text{CDCl}_3$

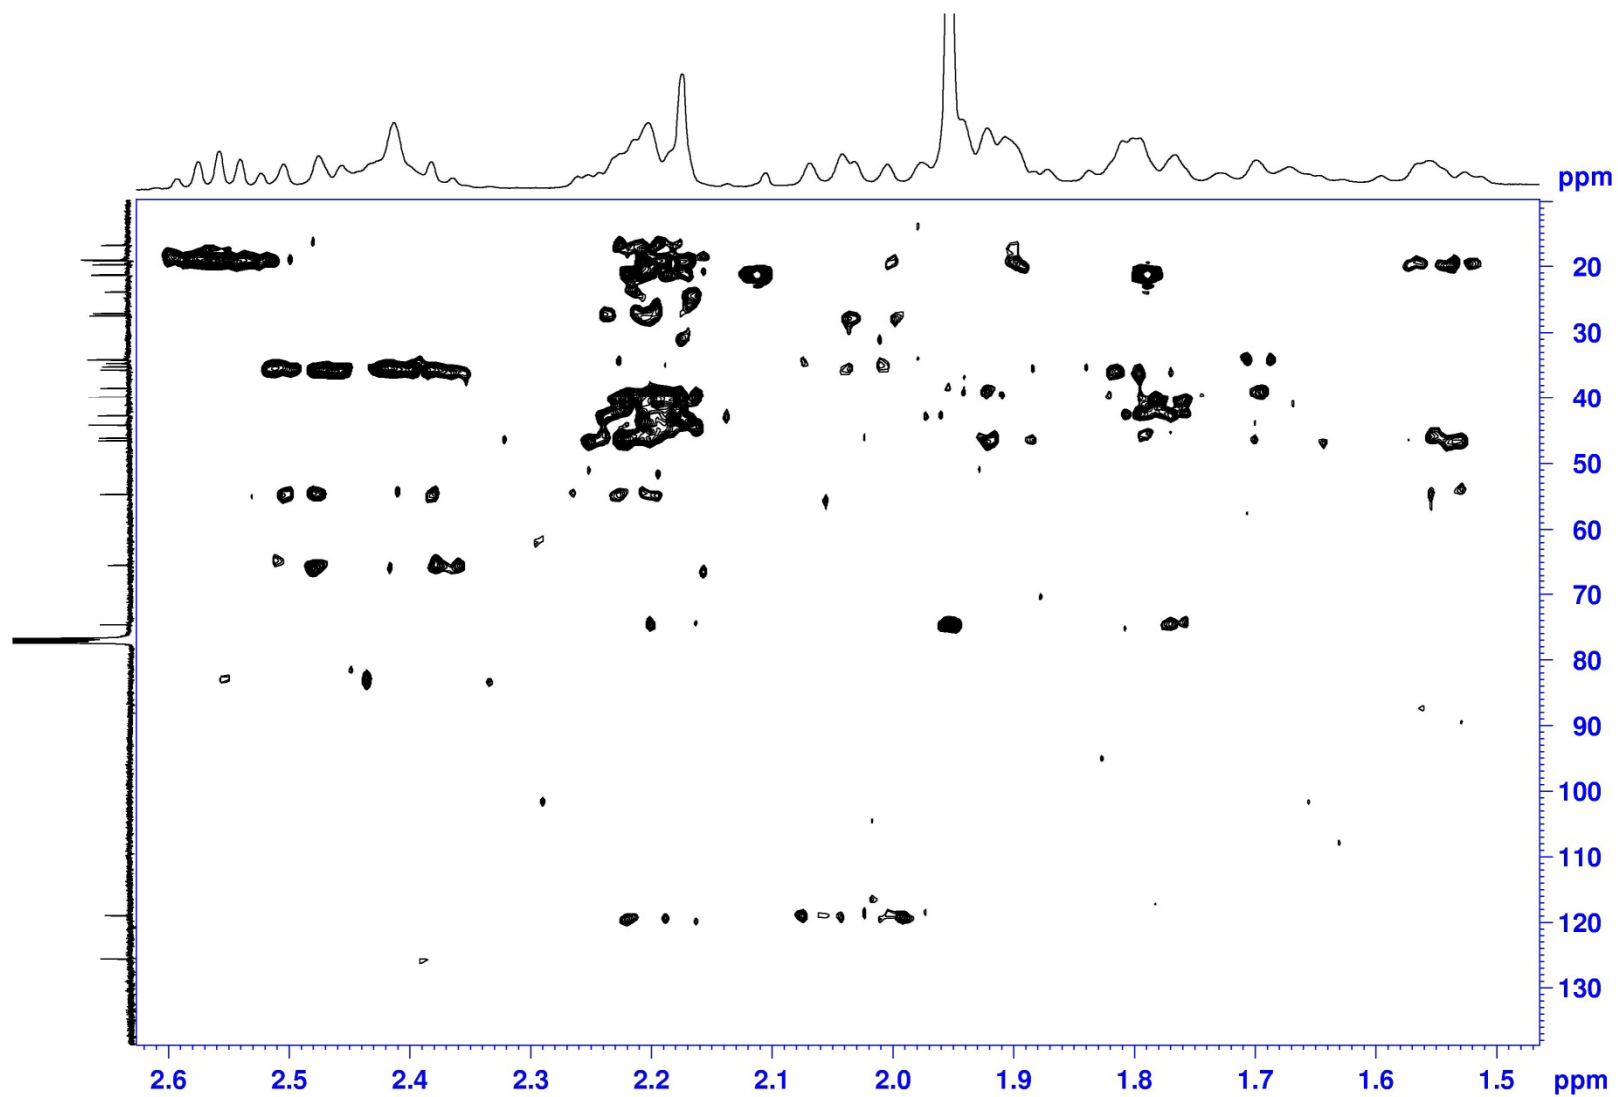

HMBC (400 MHz) spectrum of compound **10** in  $\text{CDCl}_3$

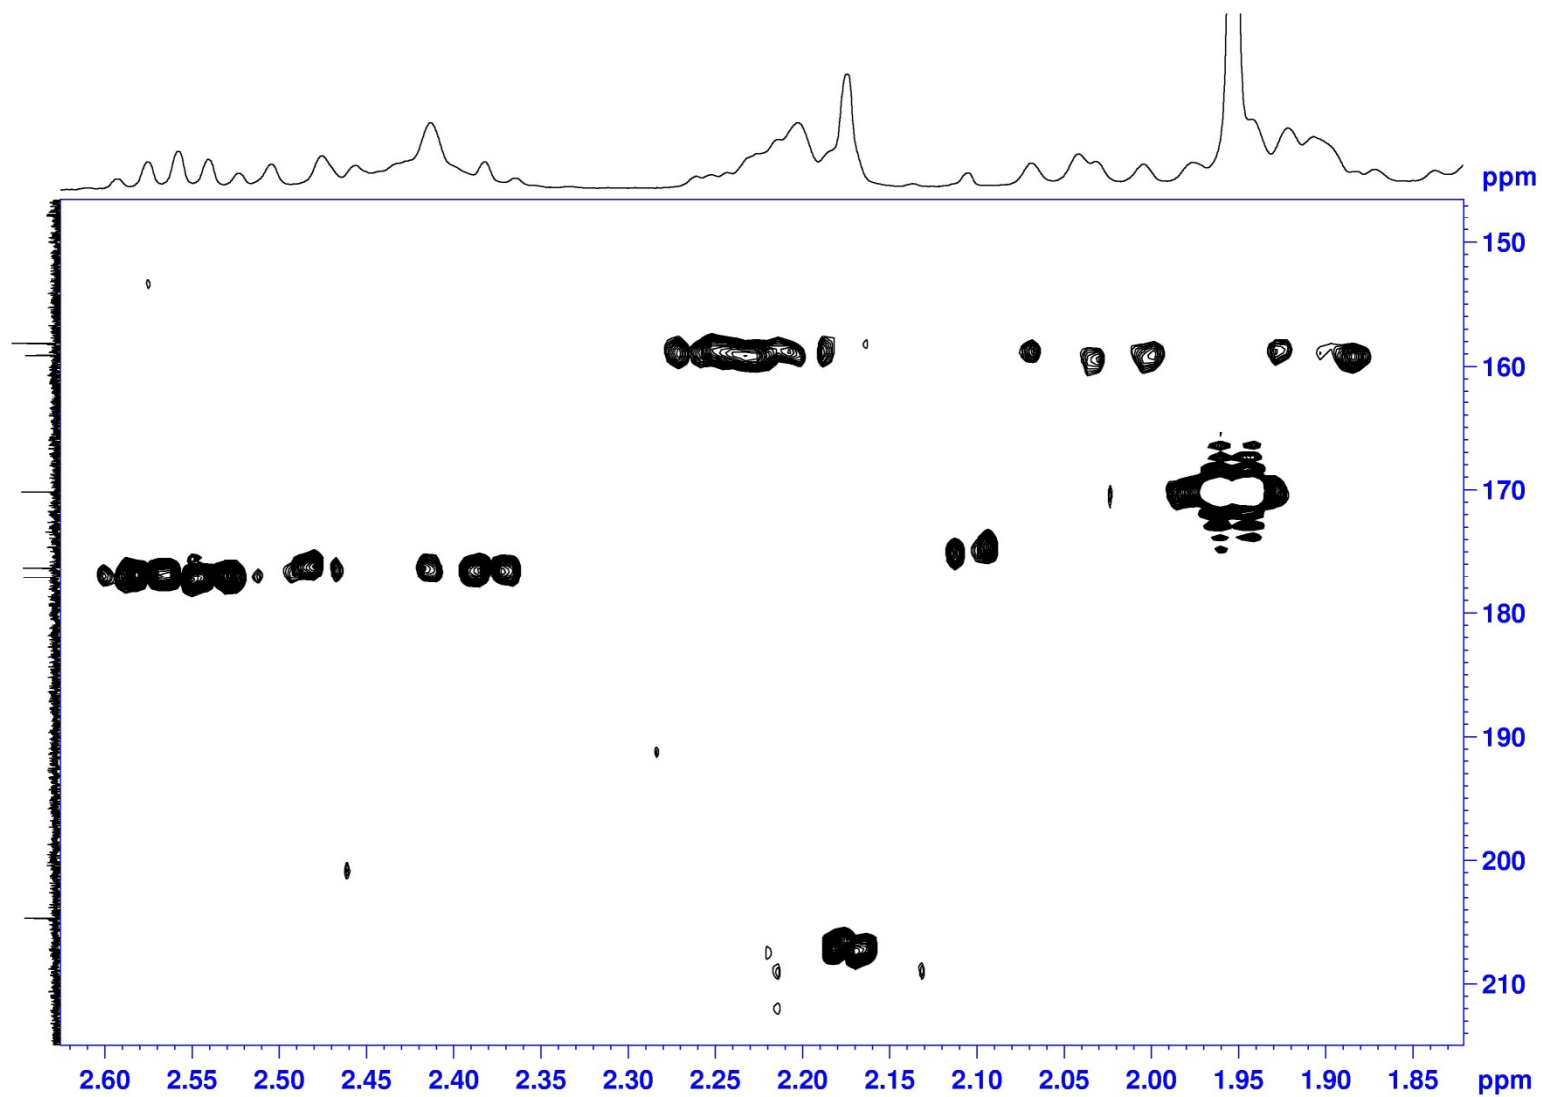

HMBC (400 MHz) spectrum of compound **10** in  $\text{CDCl}_3$

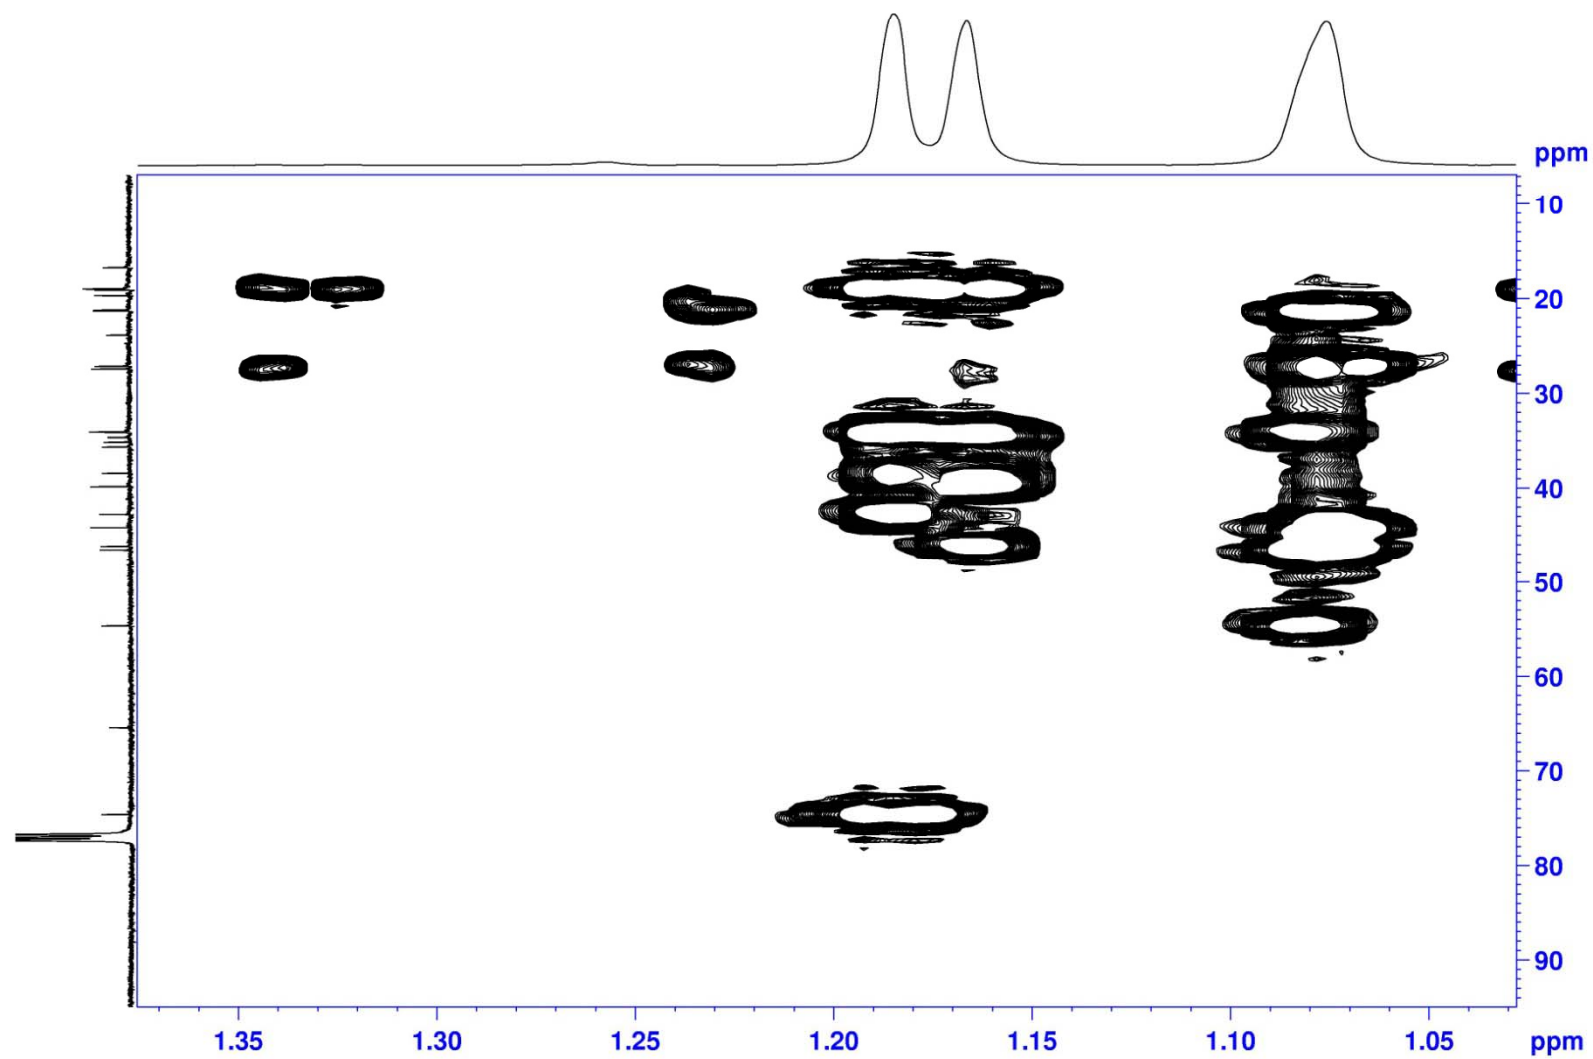

HMBC (400 MHz) spectrum of compound **10** in  $\text{CDCl}_3$

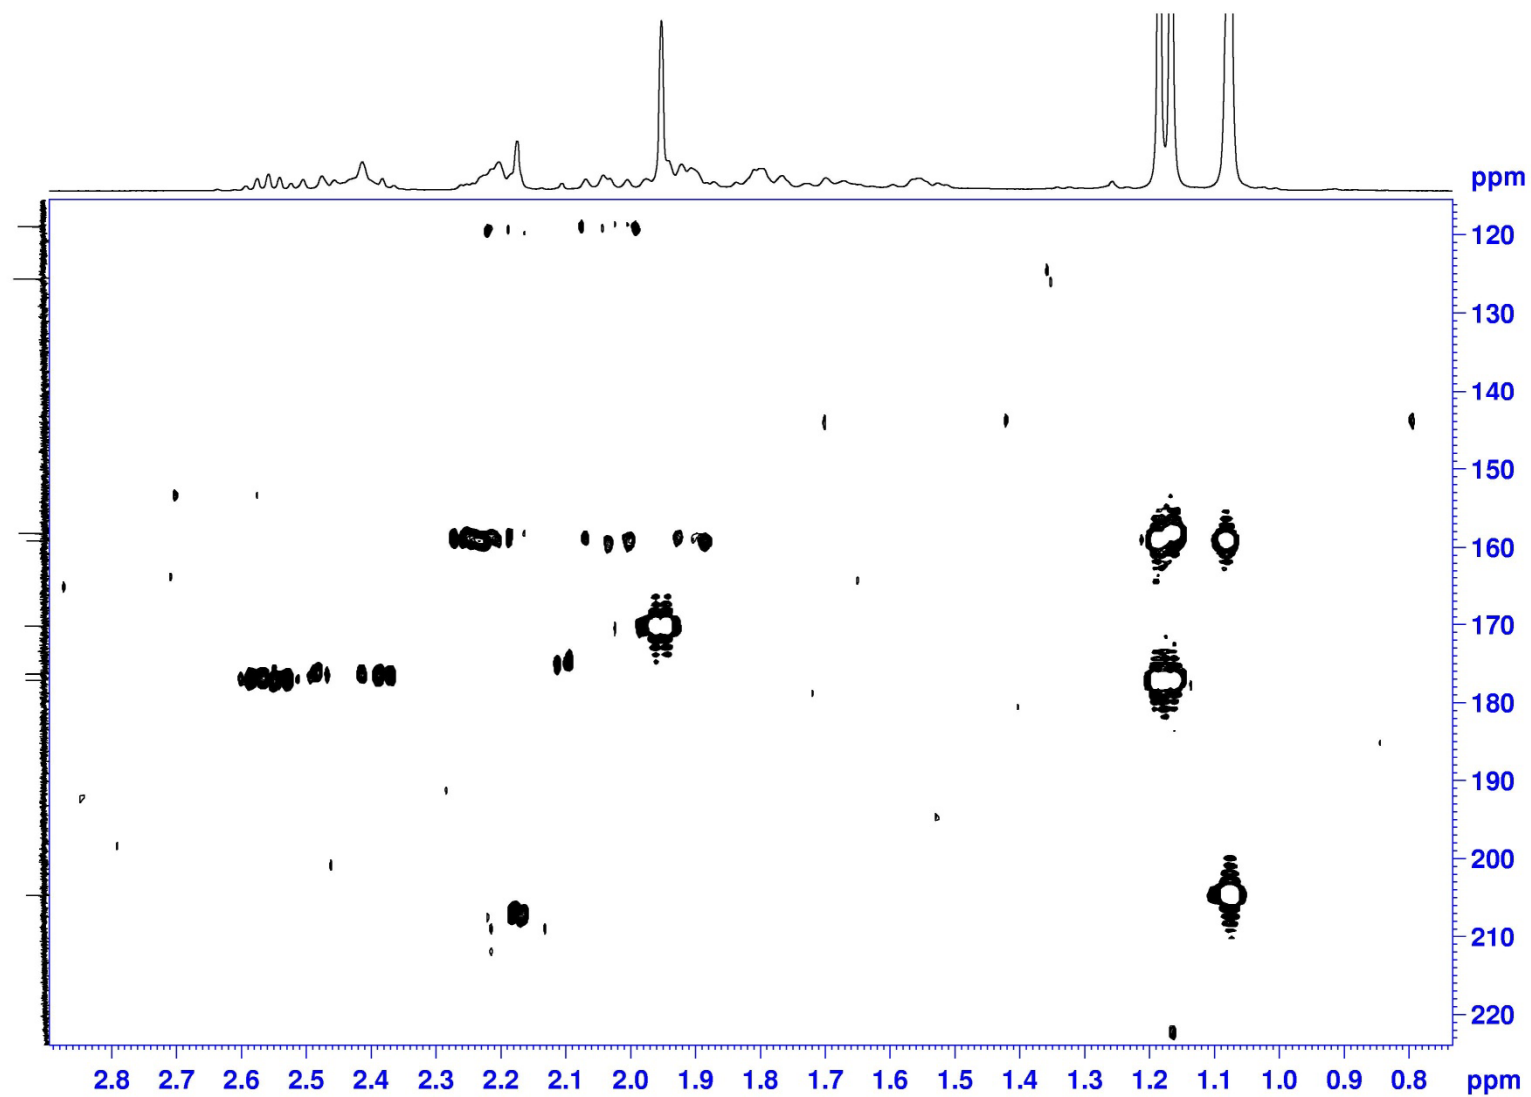



# NOESY (400 MHz) spectrum of compound **10** in CDCl<sub>3</sub>

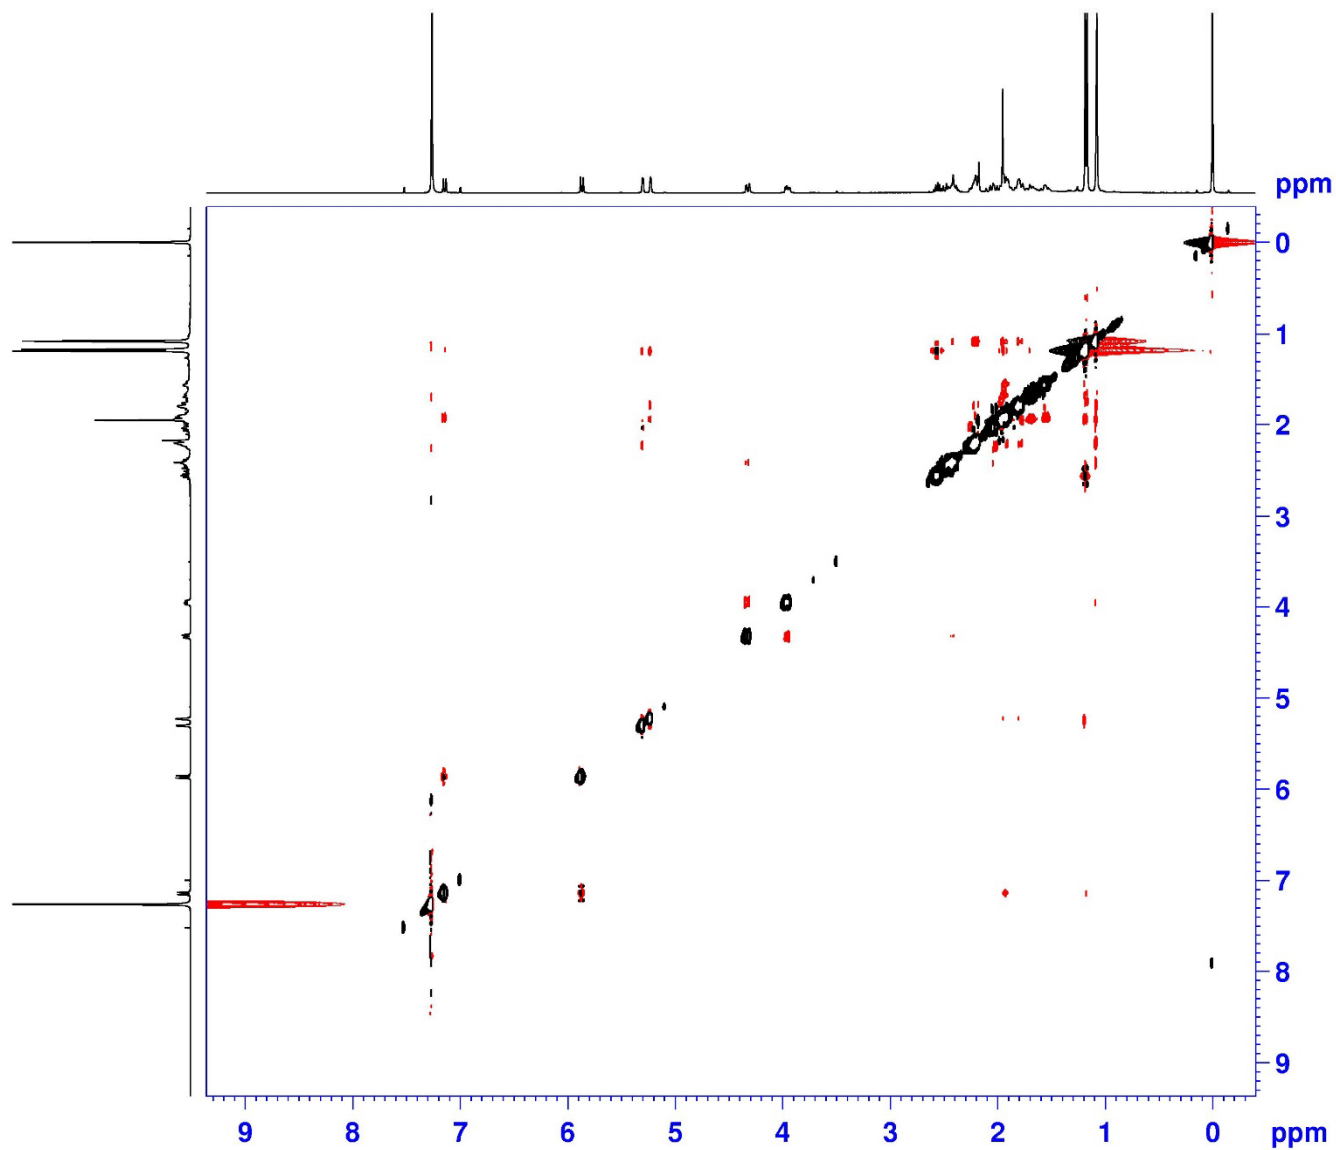

NAME ZQ-16  
EXPNO 7  
PROCNO 1  
Date\_ 20161203  
Time 13.20  
INSTRUM spect  
PROBHD 5 mm CPPBBO BB  
PULPROG noesygpphpp  
TD 2048  
SOLVENT CDCl3  
NS 16  
DS 32  
SWH 4000.000 Hz  
FIDRES 1.953125 Hz  
AQ 0.2560500 se  
RG 208.5  
DW 125.000 us  
DE 10.00 us  
TE 297.0 K  
D0 0.00011036 se  
D1 1.99385595 se  
D8 0.30000001 se  
D11 0.03000000 se  
D12 0.00002000 se  
D16 0.00020000 se  
IN0 0.00025000 se

===== CHANNEL f1 =====  
SFO1 400.1318006 MHz  
NUC1 1H  
P1 11.50 us  
P2 23.00 us  
P17 2500.00 us  
ND0 1  
TD 256  
SFO1 400.1318 MHz  
FIDRES 15.625000 Hz  
SW 9.997 PF  
FnMODE States-TPPI  
SI 1024  
SF 400.1300061 MHz  
WDW QSINE  
SSB 2  
LB 0.00 Hz  
GB 0  
PC 1.00  
SI 1024  
MC2 States-TPPI  
SF 400.1300088 MHz  
WDW QSINE  
SSB 2

S275

NOESY (400 MHz) spectrum of compound **10** in  $\text{CDCl}_3$

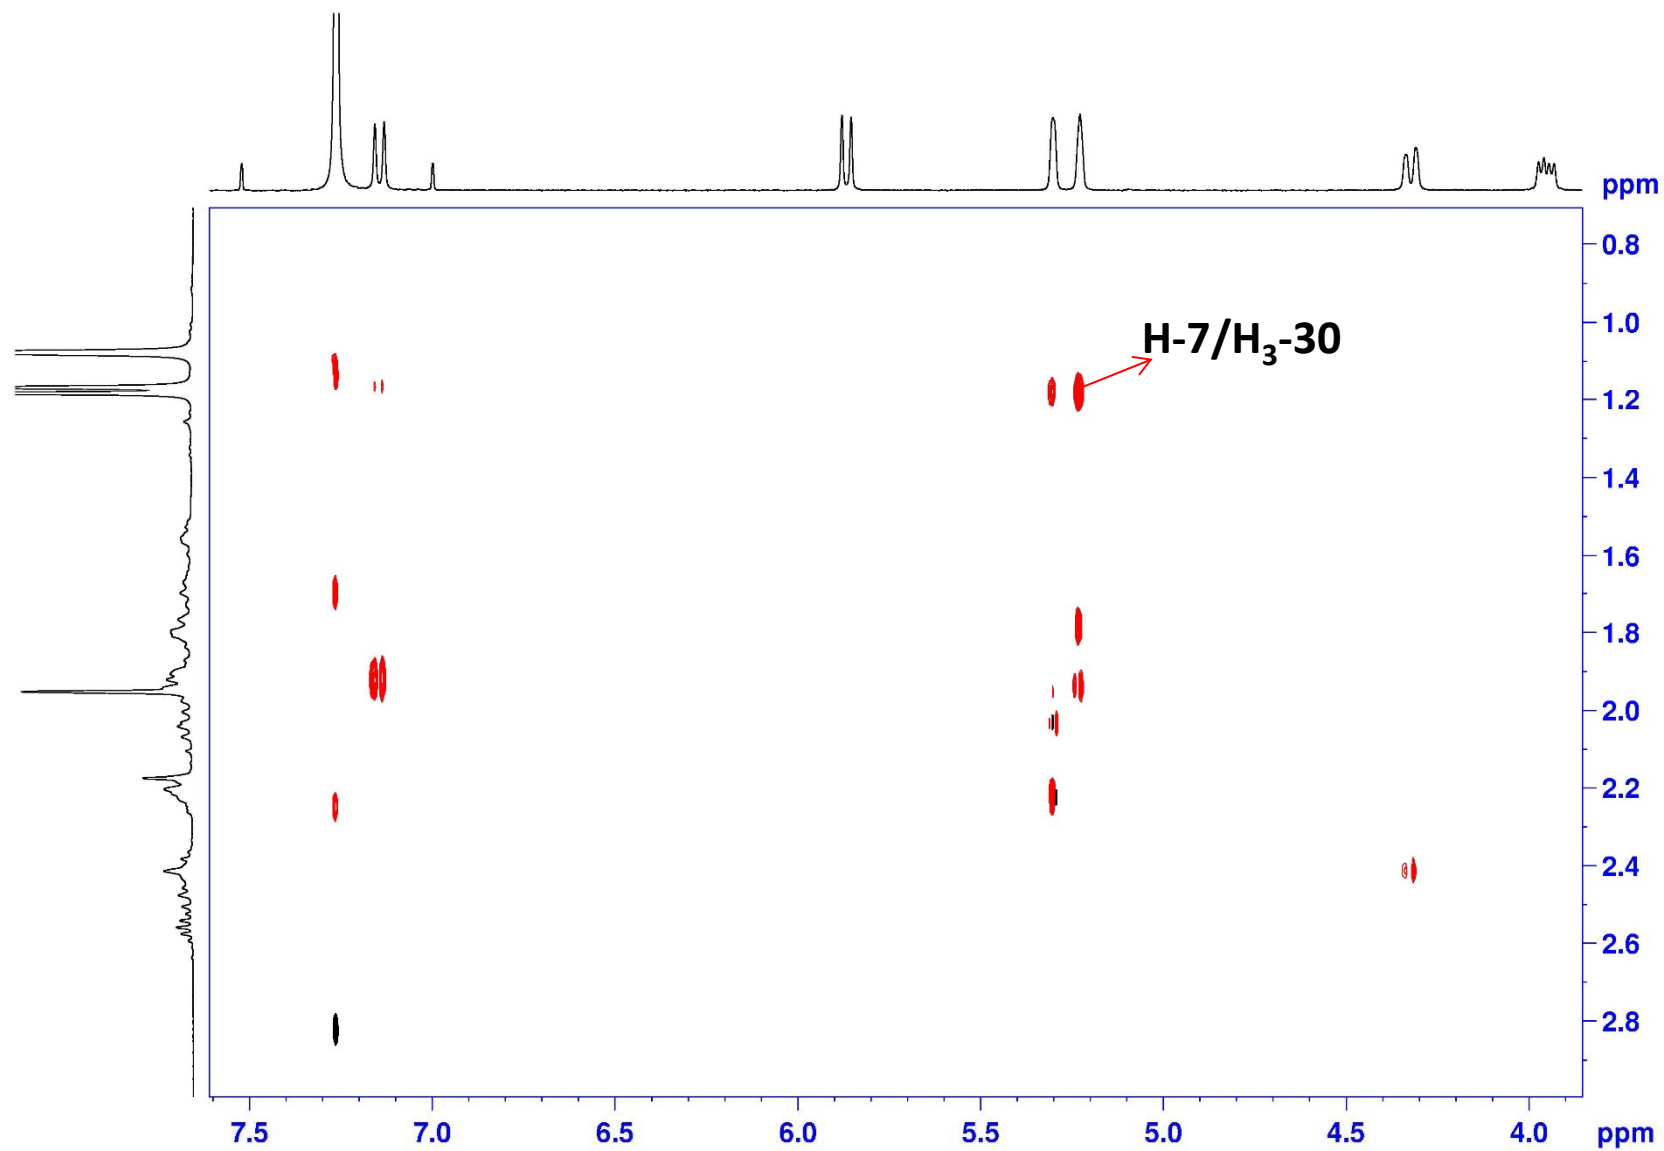

NOESY (400 MHz) spectrum of compound **10** in CDCl<sub>3</sub>

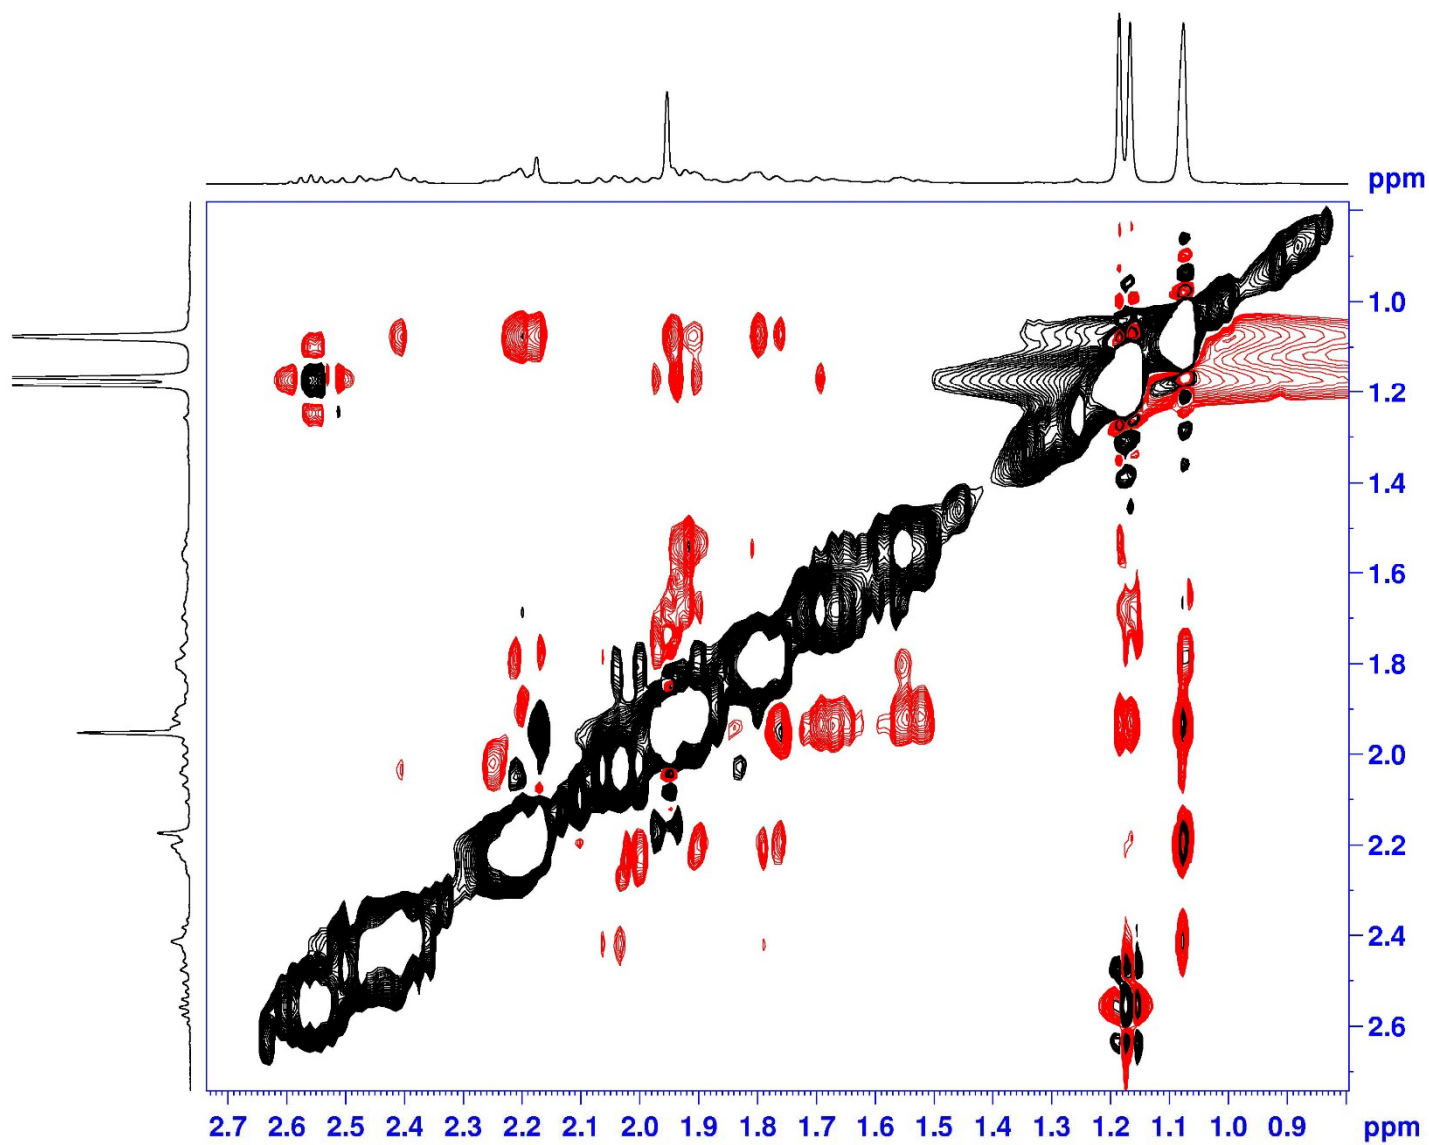

NOESY (400 MHz) spectrum of compound **10** in CDCl<sub>3</sub>

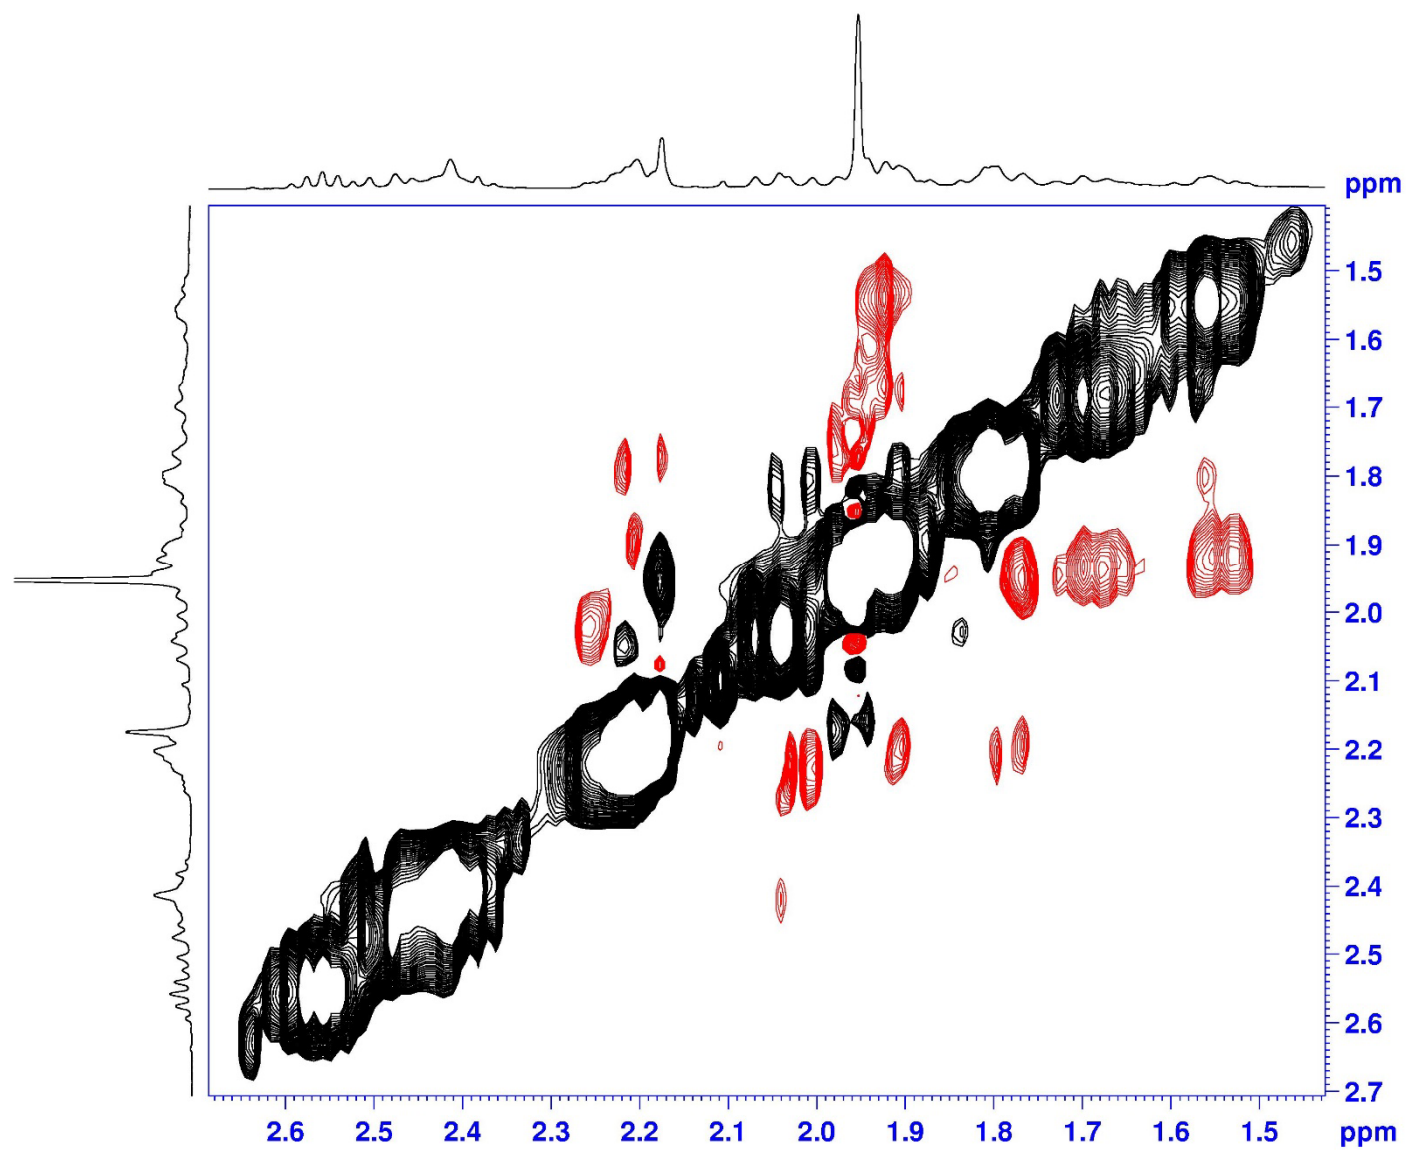

NOESY (400 MHz) spectrum of compound **10** in CDCl<sub>3</sub>

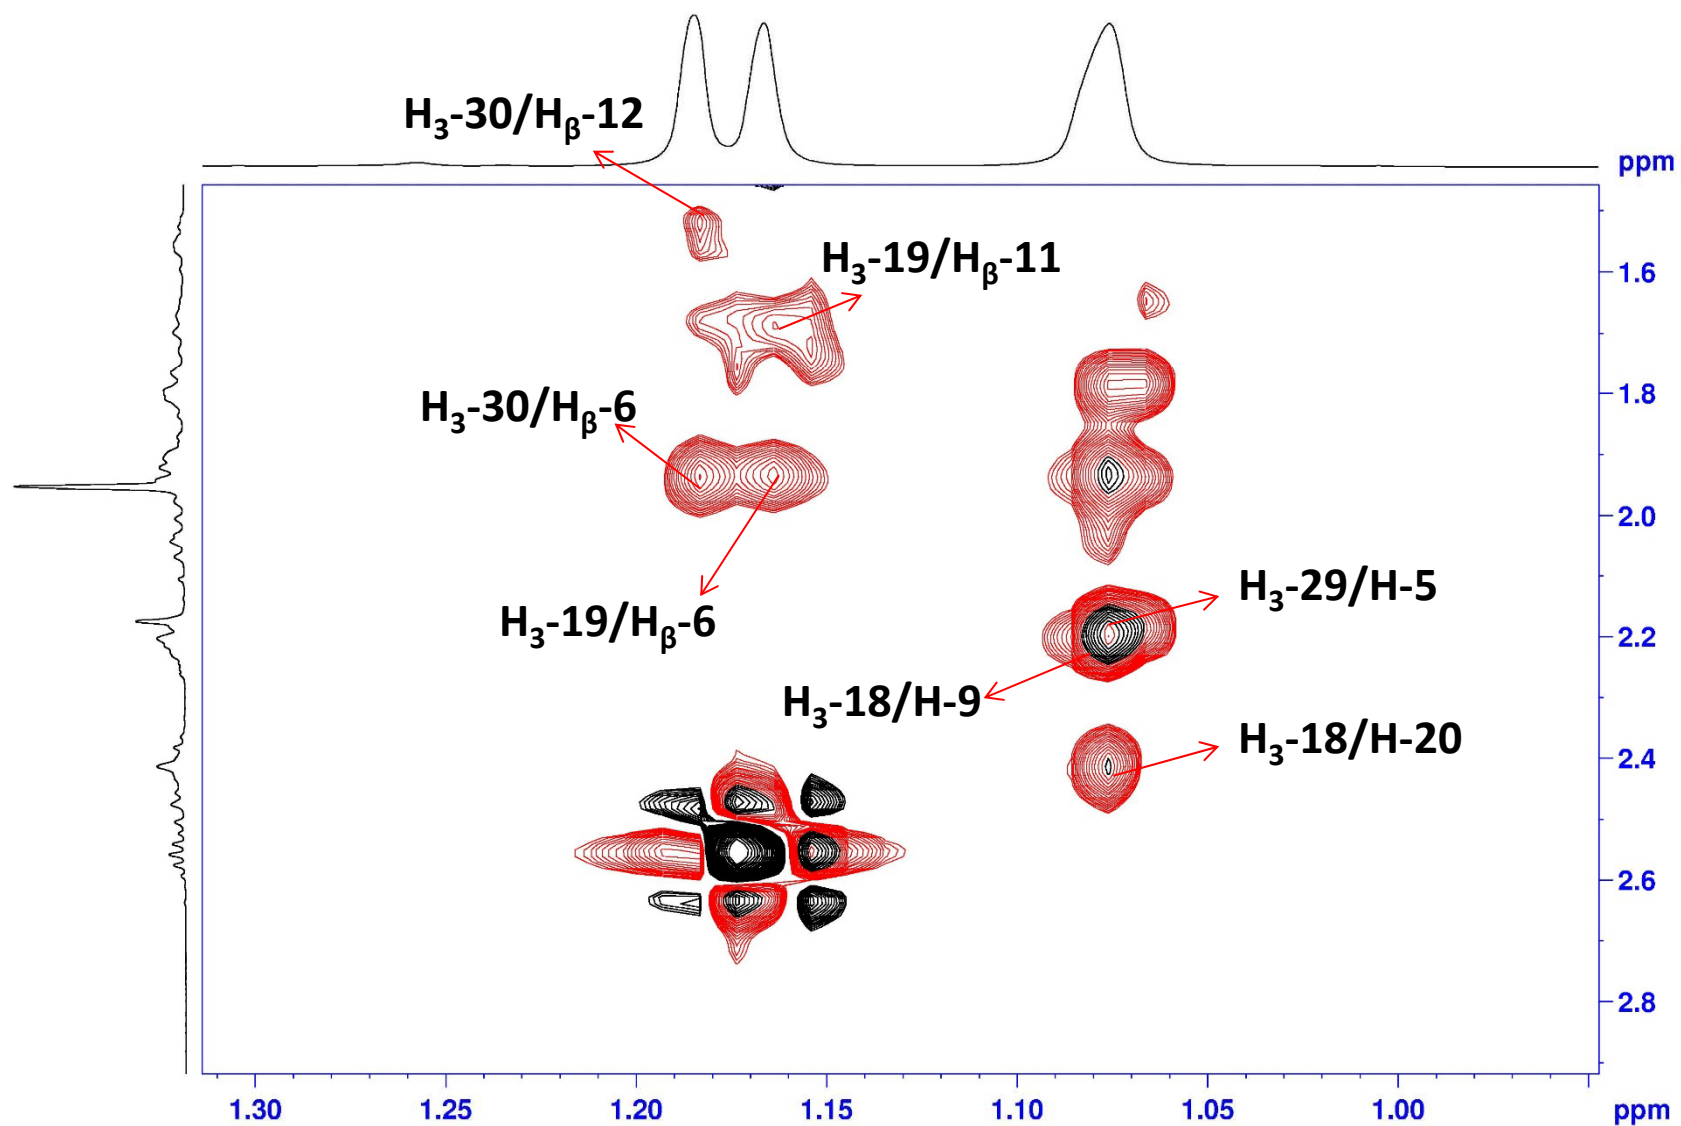

# HR-ESIMS for compound 4s

## Generic Display Report

### Analysis Info

Analysis Name D:\Data\MS\data\201810\jiangzhongping\_53-5-S\_pos\_28\_01\_5628.d  
Method LC\_Direct Infusion\_pos\_100-3000mz.m  
Sample Name jiangzhongping\_53-5-S\_pos  
Comment

Acquisition Date 10/18/2018 3:03:40 PM

Operator SCSIO  
Instrument maXis

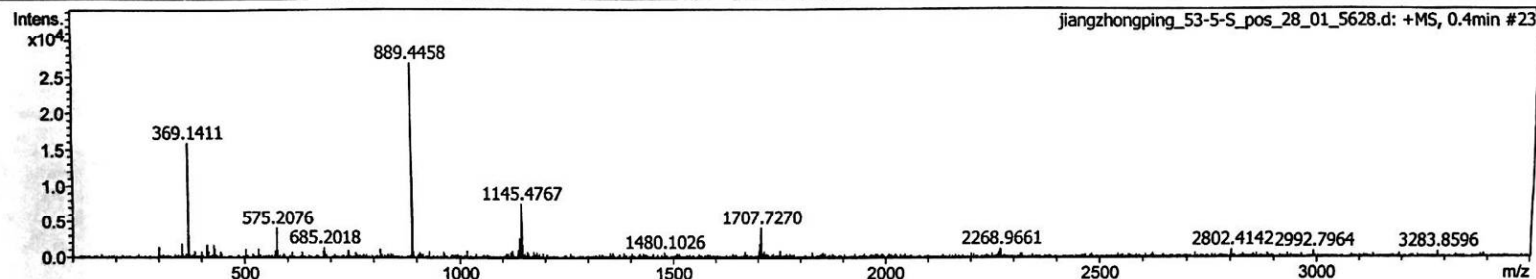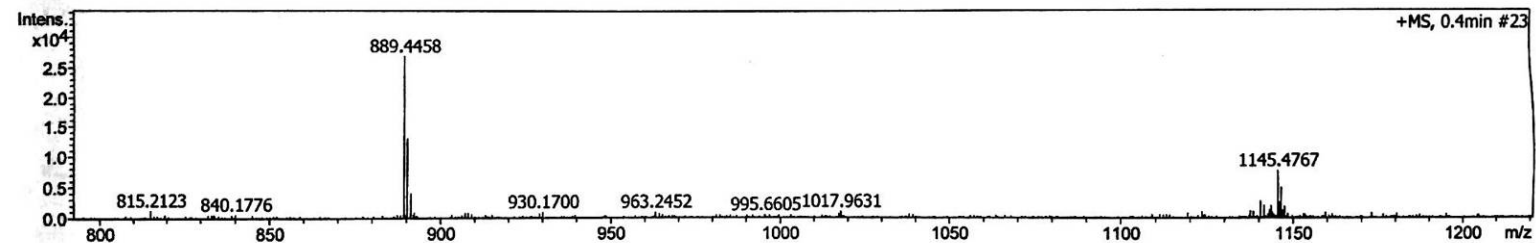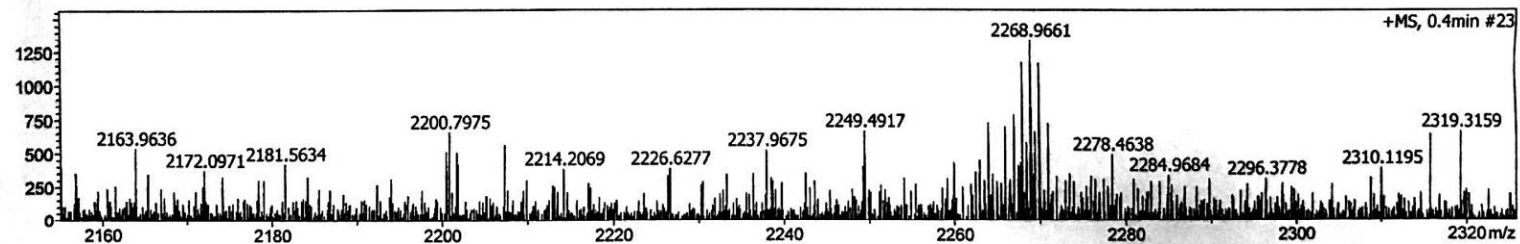

# HR-ESIMS for compound 4s

## Mass Spectrum SmartFormula Report

|               |                                                               |                  |  |                       |              |
|---------------|---------------------------------------------------------------|------------------|--|-----------------------|--------------|
| Analysis Info |                                                               | Acquisition Date |  | 10/18/2018 3:03:40 PM |              |
| Analysis Name | D:\Data\MS\data\201810\jiangzhongping_53-5-S_pos_28_01_5628.d |                  |  |                       |              |
| Method        | LC_Direct Infusion_pos_100-3000mz.m                           |                  |  | Operator              | SCSIO        |
| Sample Name   | jiangzhongping_53-5-S_pos                                     |                  |  | Instrument            | maXis        |
| Comment       |                                                               |                  |  |                       | 255552.00029 |

|                              |          |                      |          |                  |           |
|------------------------------|----------|----------------------|----------|------------------|-----------|
| <b>Acquisition Parameter</b> |          |                      |          |                  |           |
| Source Type                  | ESI      | Ion Polarity         | Positive | Set Nebulizer    | 0.4 Bar   |
| Focus                        | Active   | Set Capillary        | 4500 V   | Set Dry Heater   | 180 °C    |
| Scan Begin                   | 100 m/z  | Set End Plate Offset | 0 V      | Set Dry Gas      | 4.0 l/min |
| Scan End                     | 3500 m/z | Set Charging Voltage | 0 V      | Set Divert Valve | Waste     |
|                              |          | Set Corona           | 0 nA     | Set APCI Heater  | 0 °C      |

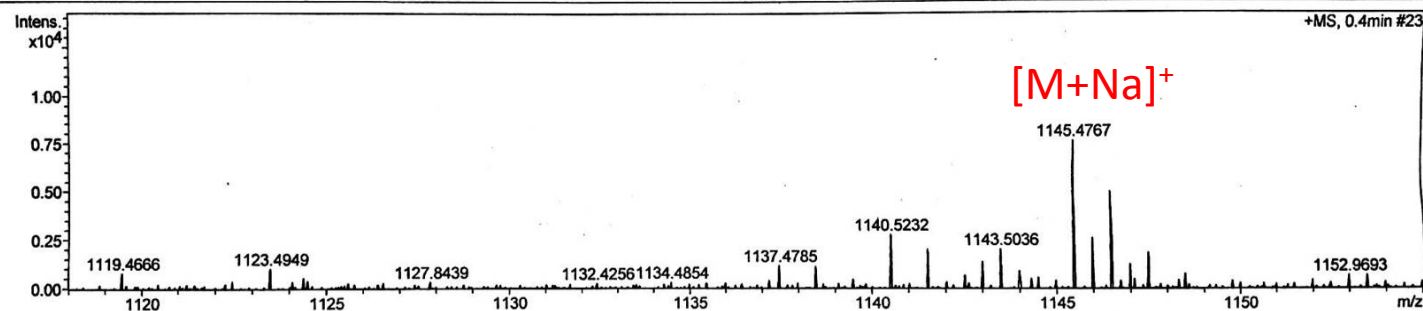

| Meas. m/z | # | Ion Formula   | Score  | m/z       | err [ppm] | err [mDa] | mSigma | rdb  | e <sup>-</sup> Conf | N-Rule |
|-----------|---|---------------|--------|-----------|-----------|-----------|--------|------|---------------------|--------|
| 1123.4949 | 1 | C60H72F9O10   | 100.00 | 1123.4976 | 2.4       | 2.7       | 121.2  | 20.5 | even                | ok     |
| 1145.4767 | 1 | C60H71F9NaO10 | 100.00 | 1145.4796 | -2.5      | -2.8      | 18.1   | 20.5 | even                | ok     |

jiangzhongping\_53-5-S\_pos\_28\_01\_5628.d

Bruker Compass DataAnalysis 4.1

printed: 10/18/2018 3:08:57 PM

by: SCSIO

Page 1 of 1



$^1\text{H}$  NMR (400 MHz) spectrum of compound **4s** in  $\text{CDCl}_3$

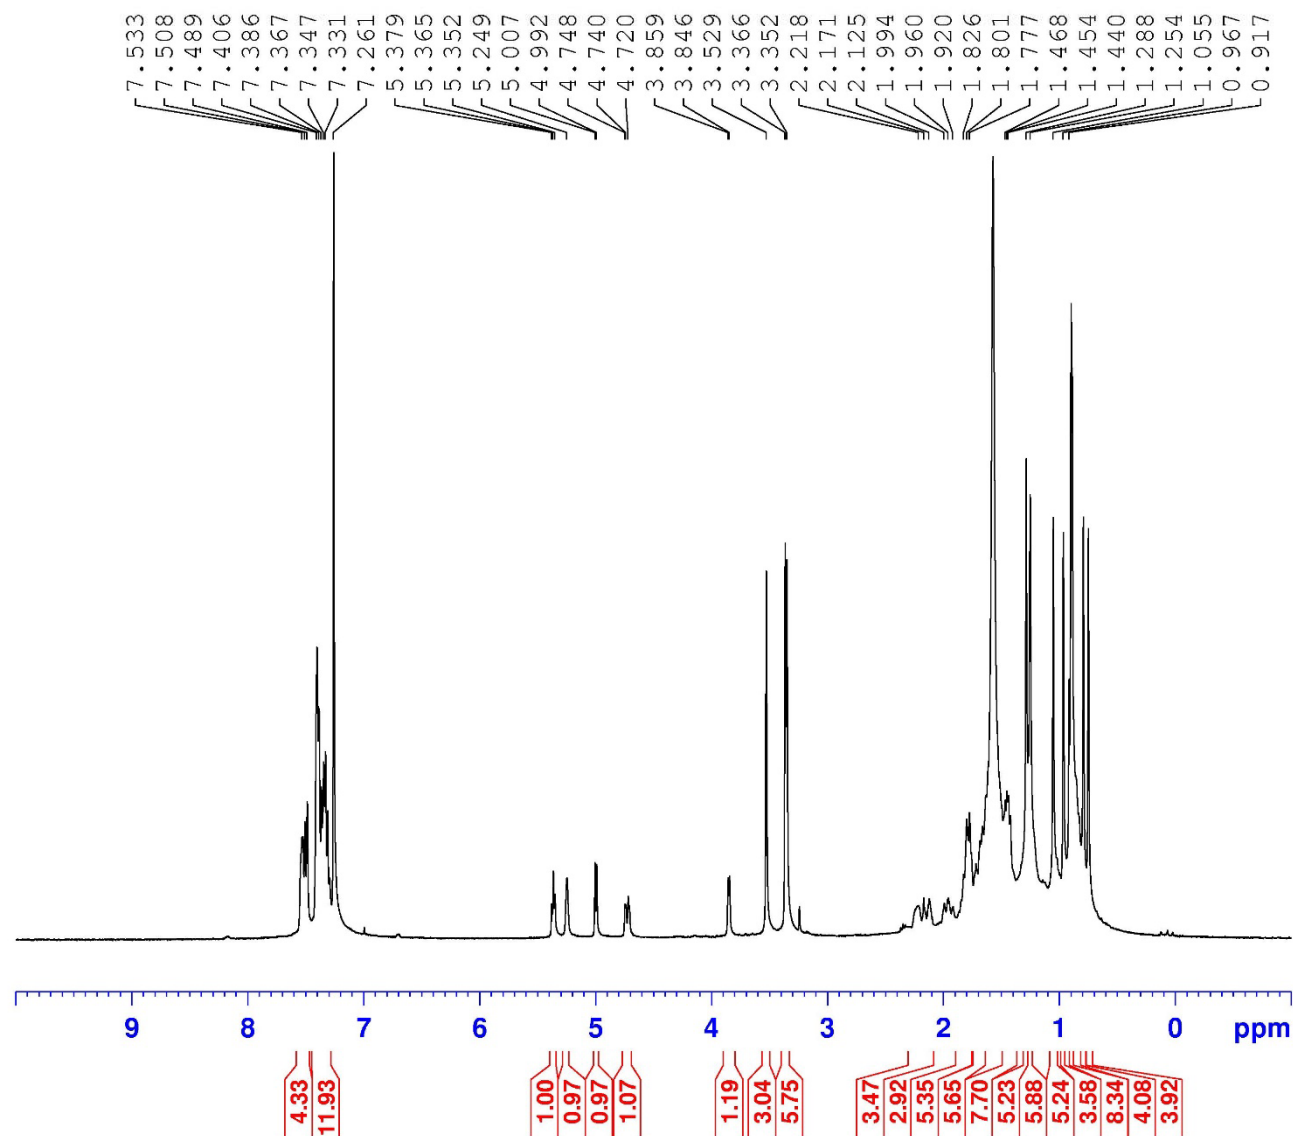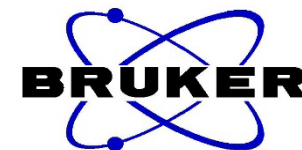

NAME XG-53-5-S-MOSHER  
 EXPNO 20  
 PROCNO 1  
 Date\_ 20180804  
 Time 12.29  
 INSTRUM spect  
 PROBHD 5 mm CPPBBO BB  
 PULPROG zg30  
 TD 65536  
 SOLVENT  $\text{CDCl}_3$   
 NS 32  
 DS 2  
 SWH 8223.685 Hz  
 FIDRES 0.125483 Hz  
 AQ 3.9846387 sec  
 RG 208.5  
 DW 60.800 usec  
 DE 10.00 usec  
 TE 297.0 K  
 D1 1.00000000 sec  
 TD0 1

===== CHANNEL f1 =====  
 SF01 400.1324710 MHz  
 NUC1  $^1\text{H}$   
 P1 11.50 usec  
 SI 65536  
 SF 400.1300098 MHz  
 WDW EM  
 SSB 0  
 LB 0.30 Hz  
 GB 0  
 PC 1.00



$^1\text{H}$  NMR (400 MHz) spectrum of compound **4s** in  $\text{CDCl}_3$

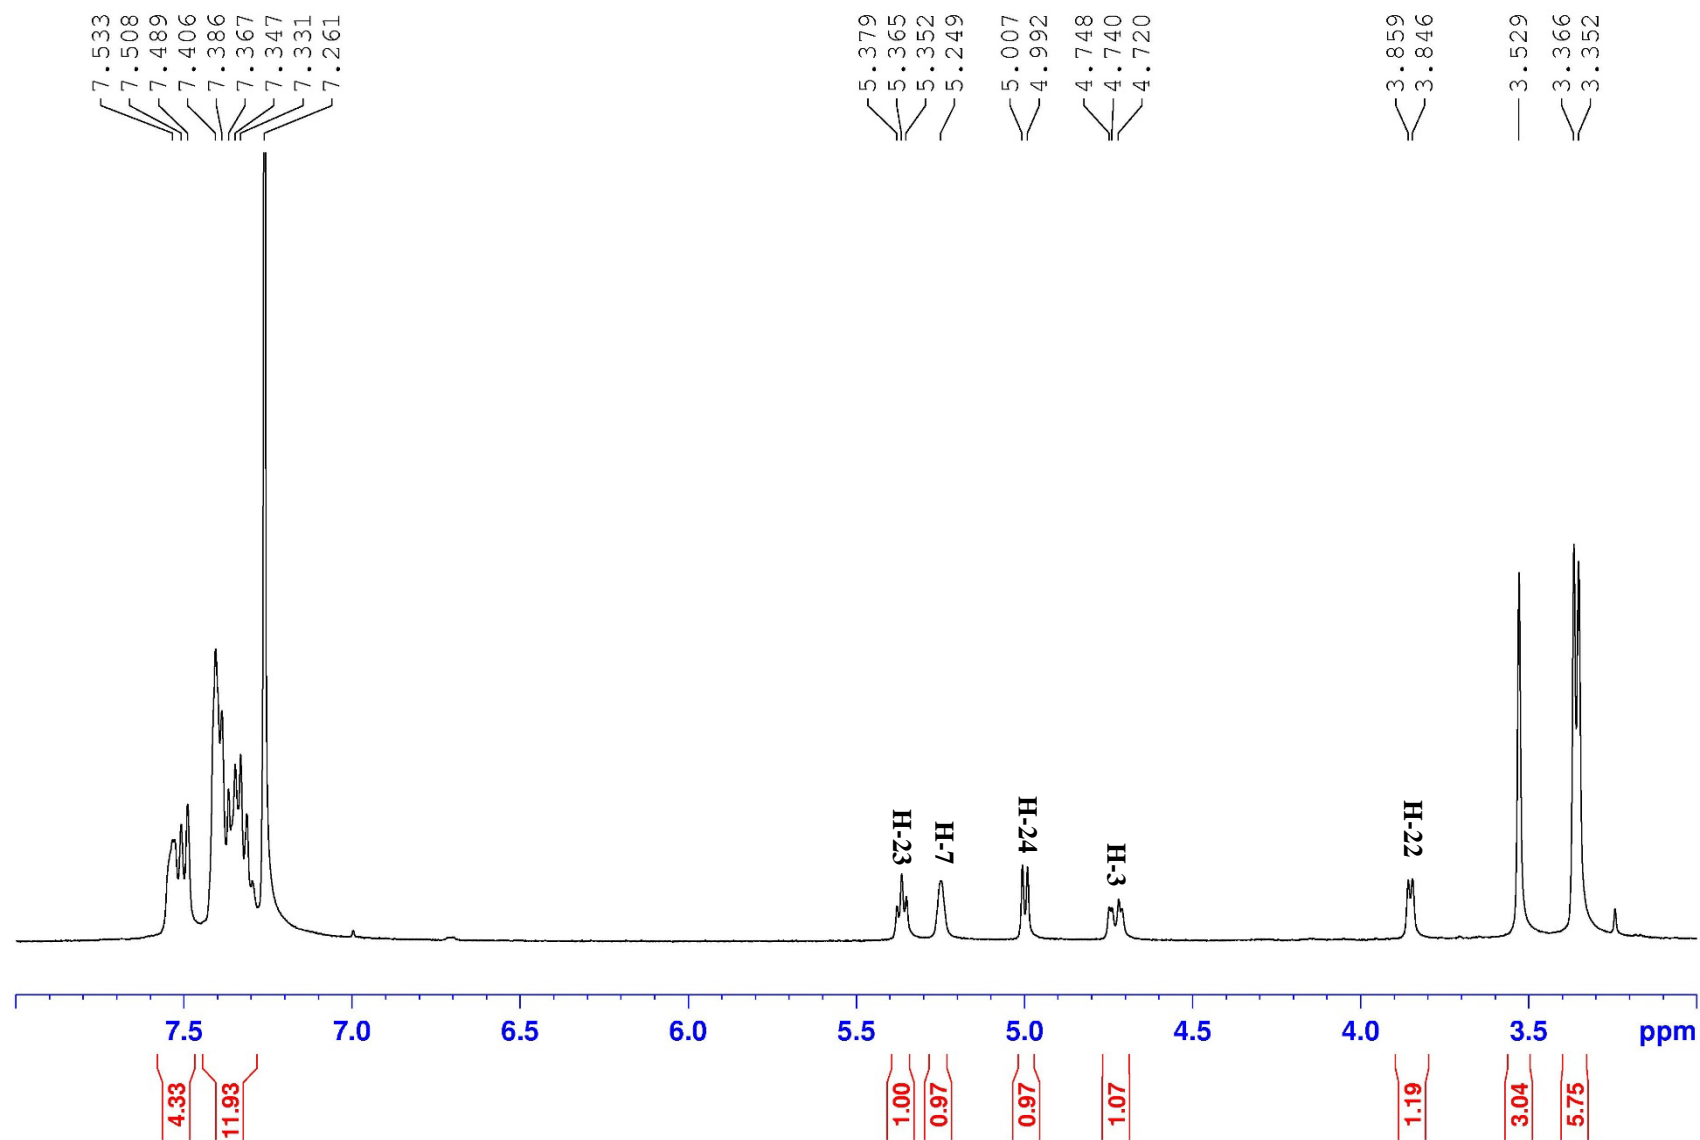

$^1\text{H}$  NMR (400 MHz) spectrum of compound **4s** in  $\text{CDCl}_3$

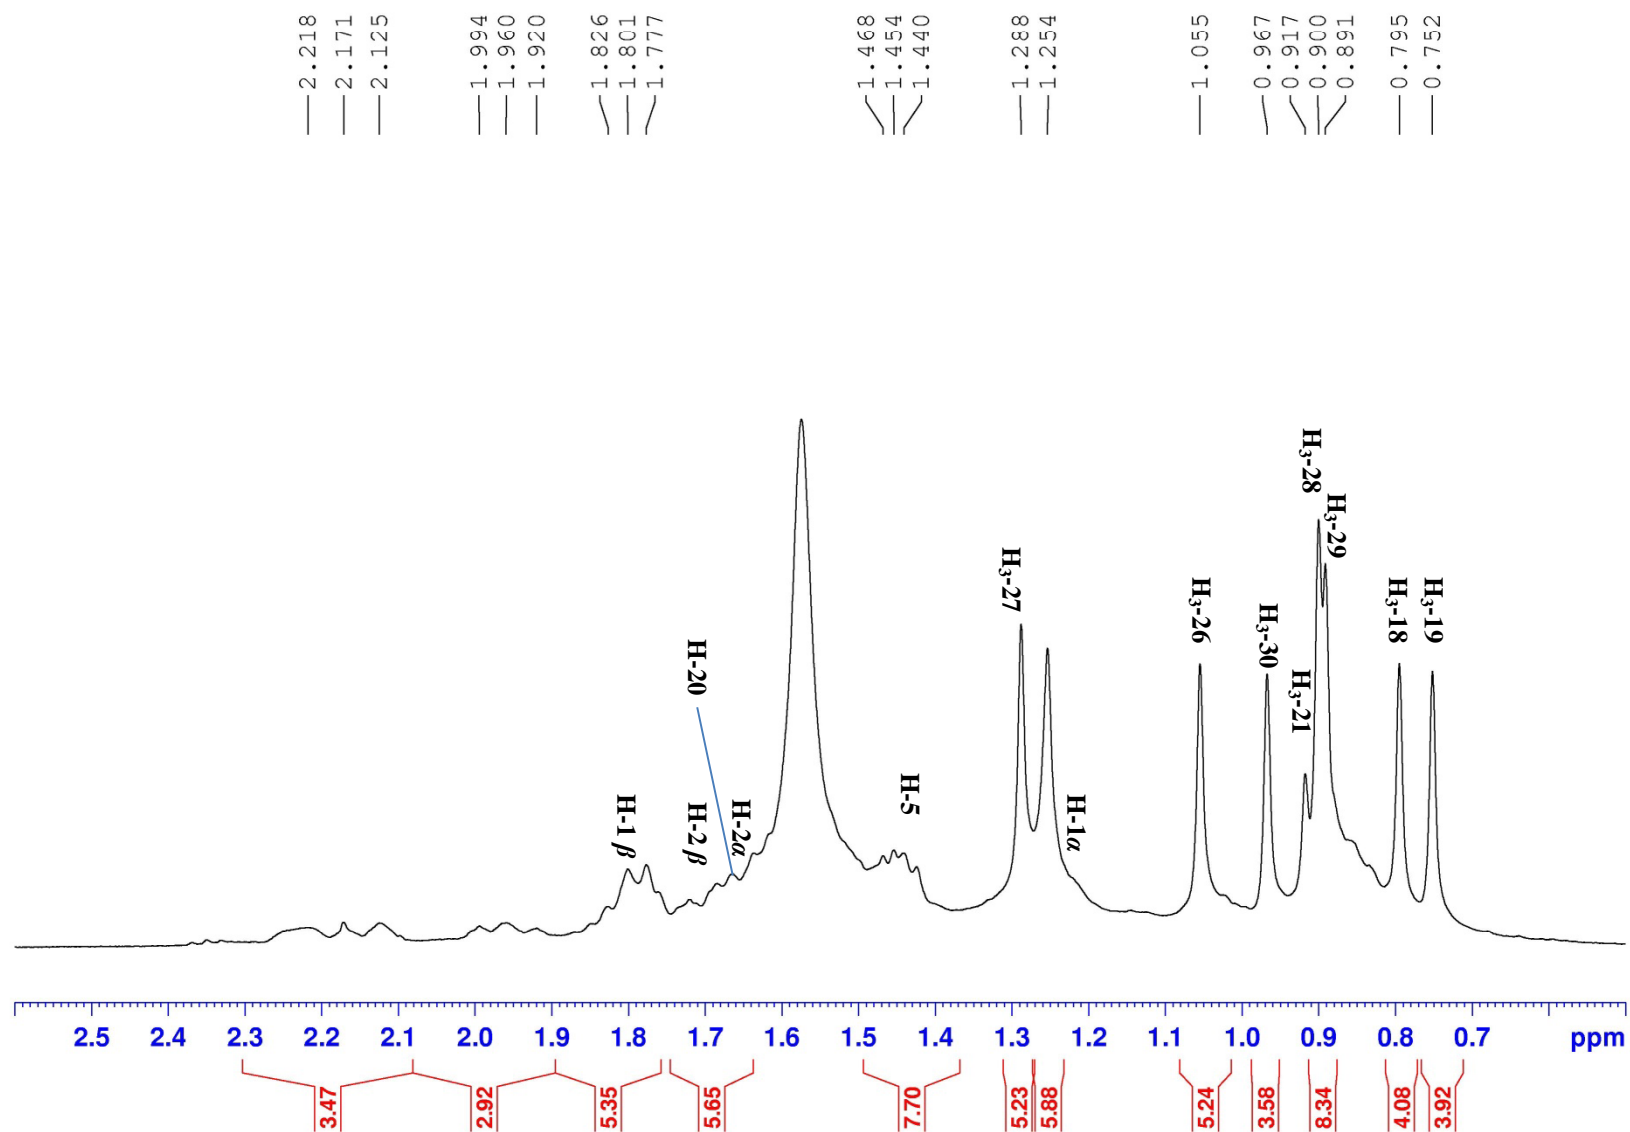

# HR-ESIMS for compound **4r**

## Generic Display Report

### Analysis Info

Analysis Name D:\Data\MS\data\201810\jiangzhongping\_53-5-R\_pos\_27\_01\_5627.d  
Method LC\_DirectInfusion\_pos\_100-3000mz.m  
Sample Name jiangzhongping\_53-5-R\_pos  
Comment

Acquisition Date 10/18/2018 3:00:09 PM

Operator SCSIO  
Instrument maXis

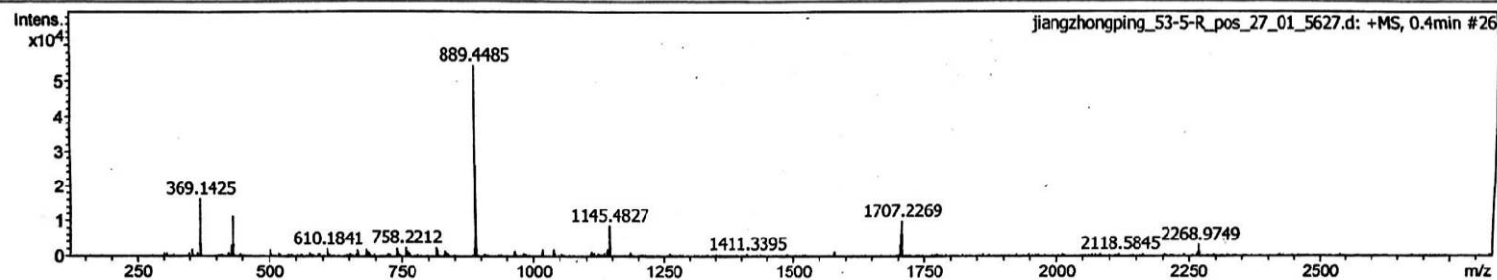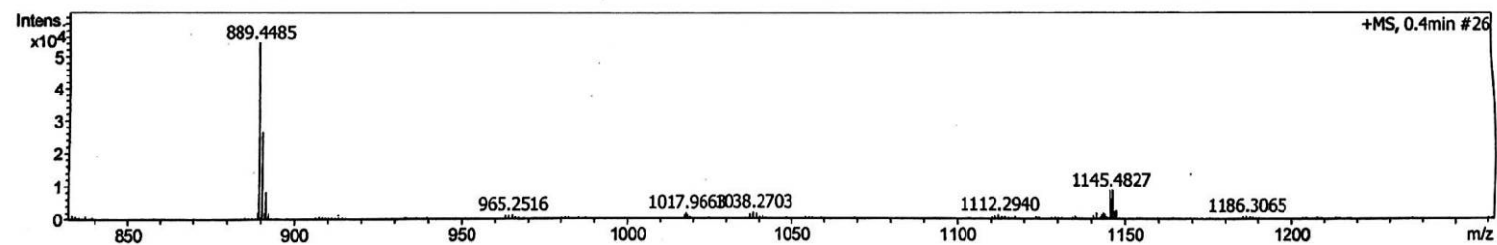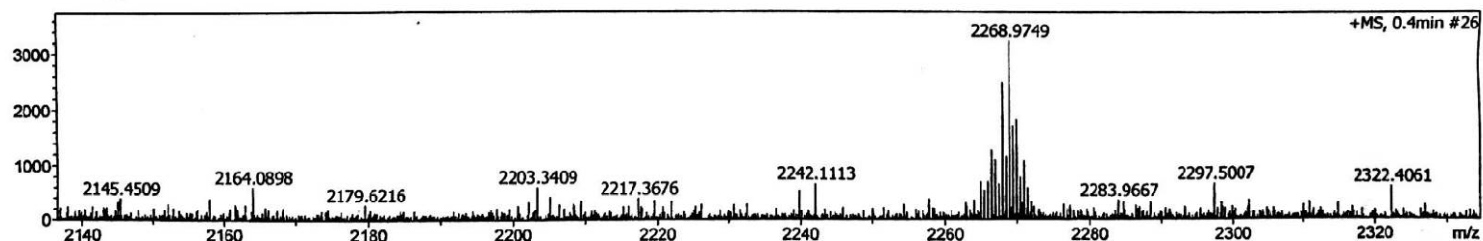

# HR-ESIMS for compound **4r**

## Mass Spectrum SmartFormula Report

### Analysis Info

Analysis Name D:\Data\MS\data\201810\jiangzhongping\_53-5-R\_pos\_27\_01\_5627.d  
 Method LC\_Direct Infusion\_pos\_100-3000mz.m  
 Sample Name jiangzhongping\_53-5-R\_pos  
 Comment

Acquisition Date 10/18/2018 3:00:09 PM

Operator SCSIO  
 Instrument maXis 255552.00029

### Acquisition Parameter

|             |          |                      |          |                  |           |
|-------------|----------|----------------------|----------|------------------|-----------|
| Source Type | ESI      | Ion Polarity         | Positive | Set Nebulizer    | 0.4 Bar   |
| Focus       | Active   | Set Capillary        | 4500 V   | Set Dry Heater   | 180 °C    |
| Scan Begin  | 100 m/z  | Set End Plate Offset | 0 V      | Set Dry Gas      | 4.0 l/min |
| Scan End    | 3500 m/z | Set Charging Voltage | 0 V      | Set Divert Valve | Waste     |
|             |          | Set Corona           | 0 nA     | Set APCI Heater  | 0 °C      |

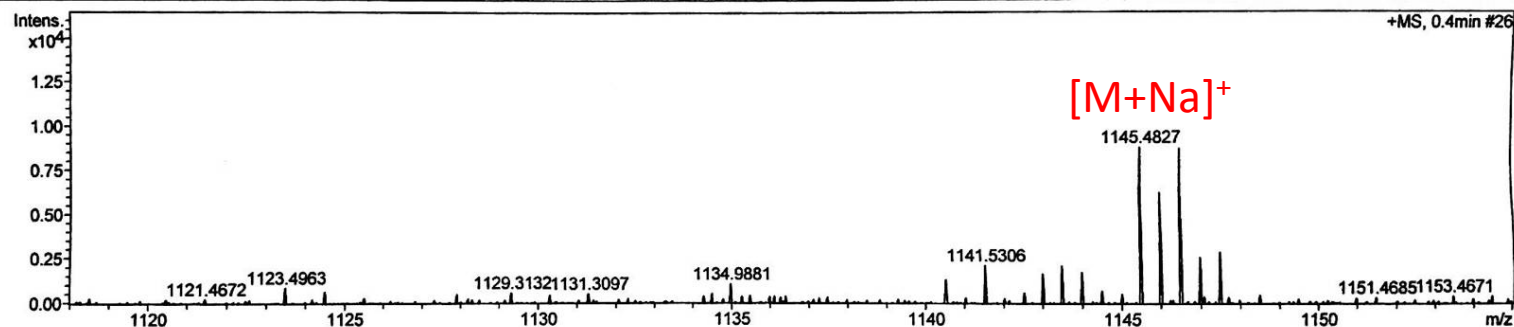

| Meas. m/z | # | Ion Formula   | Score  | m/z       | err [ppm] | err [mDa] | mSigma | rdb  | e <sup>-</sup> Conf | N-Rule |
|-----------|---|---------------|--------|-----------|-----------|-----------|--------|------|---------------------|--------|
| 1123.4963 | 1 | C60H72F9O10   | 100.00 | 1123.4976 | -1.2      | -1.3      | 113.8  | 20.5 | even                | ok     |
| 1145.4827 | 1 | C60H71F9NaO10 | 100.00 | 1145.4796 | -2.7      | -3.1      | 154.1  | 20.5 | even                | ok     |

jiangzhongping\_53-5-R\_pos\_27\_01\_5627.d

Bruker Compass DataAnalysis 4.1

printed: 10/18/2018 3:06:11 PM

by: SCSIO

Page 1 of 1

$^1\text{H}$  NMR (400 MHz) spectrum of compound **4r** in  $\text{CDCl}_3$

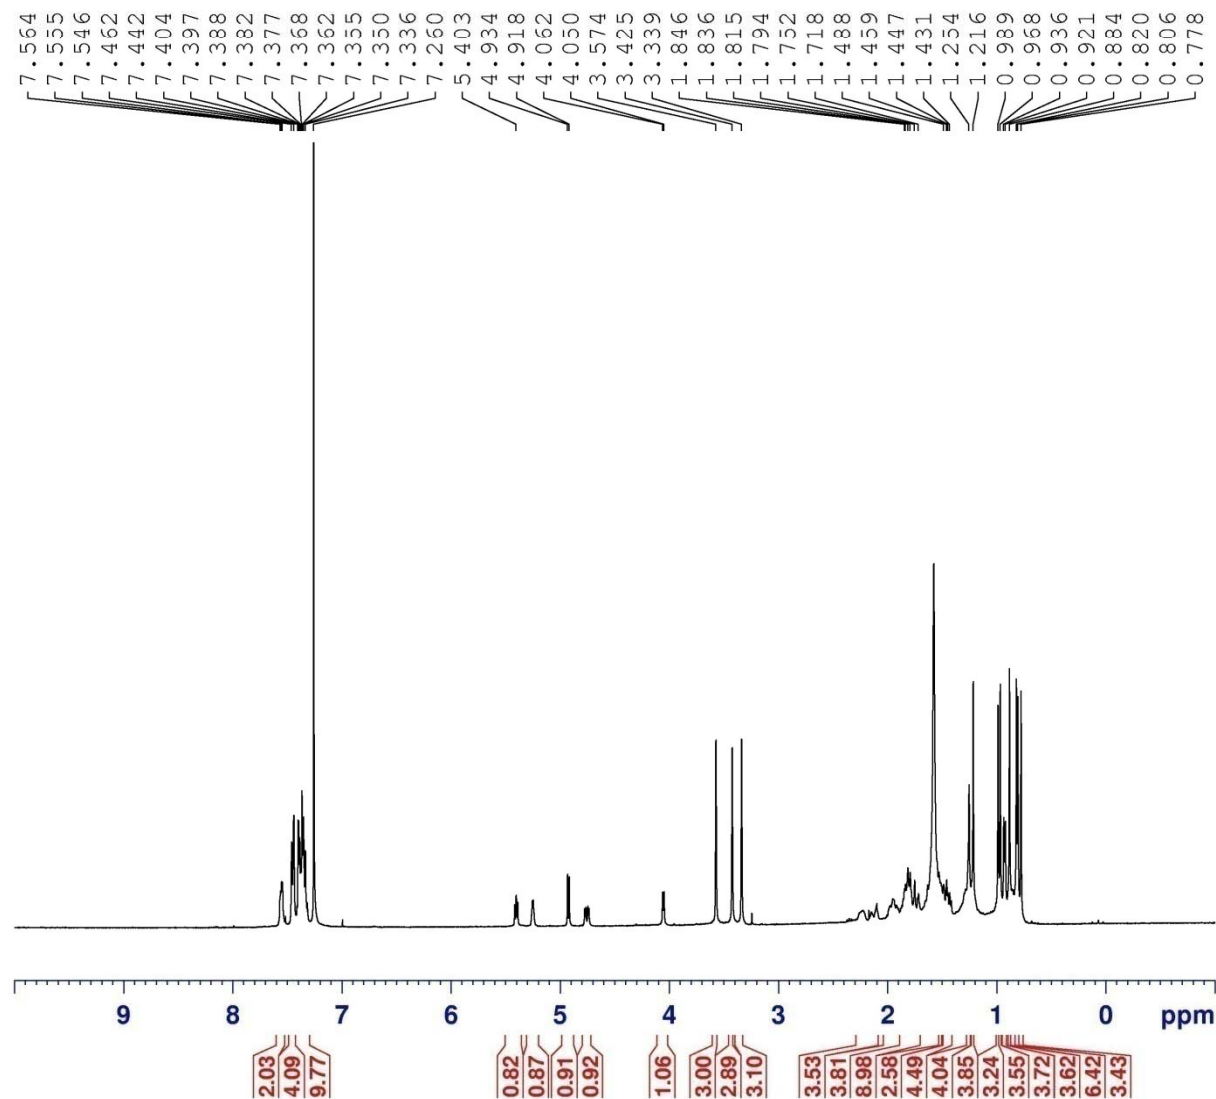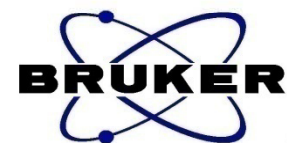

```

EXPNO 1
PROCNO 1
Date_ 20180728
Time 21.32
INSTRUM spect
PROBHD 5 mm CPPBBO BB
PULPROG zg30
TD 65536
SOLVENT CDCl3
NS 16
DS 2
SWH 8223.685 Hz
FIDRES 0.125483 Hz
AQ 3.9846387 sec
RG 208.5
DW 60.800 usec
DE 10.00 usec
TE 297.0 K
D1 1.00000000 sec
TD0 1
  
```

```

===== CHANNEL f1 =====
SFO1 400.1324710 MHz
NUC1 1H
P1 11.50 usec
SI 65536
SF 400.1300098 MHz
WDW EM
SSB 0
LB 0.30 Hz
GB 0
PC 1.00
  
```

$^1\text{H}$  NMR (400 MHz) spectrum of compound **4r** in  $\text{CDCl}_3$

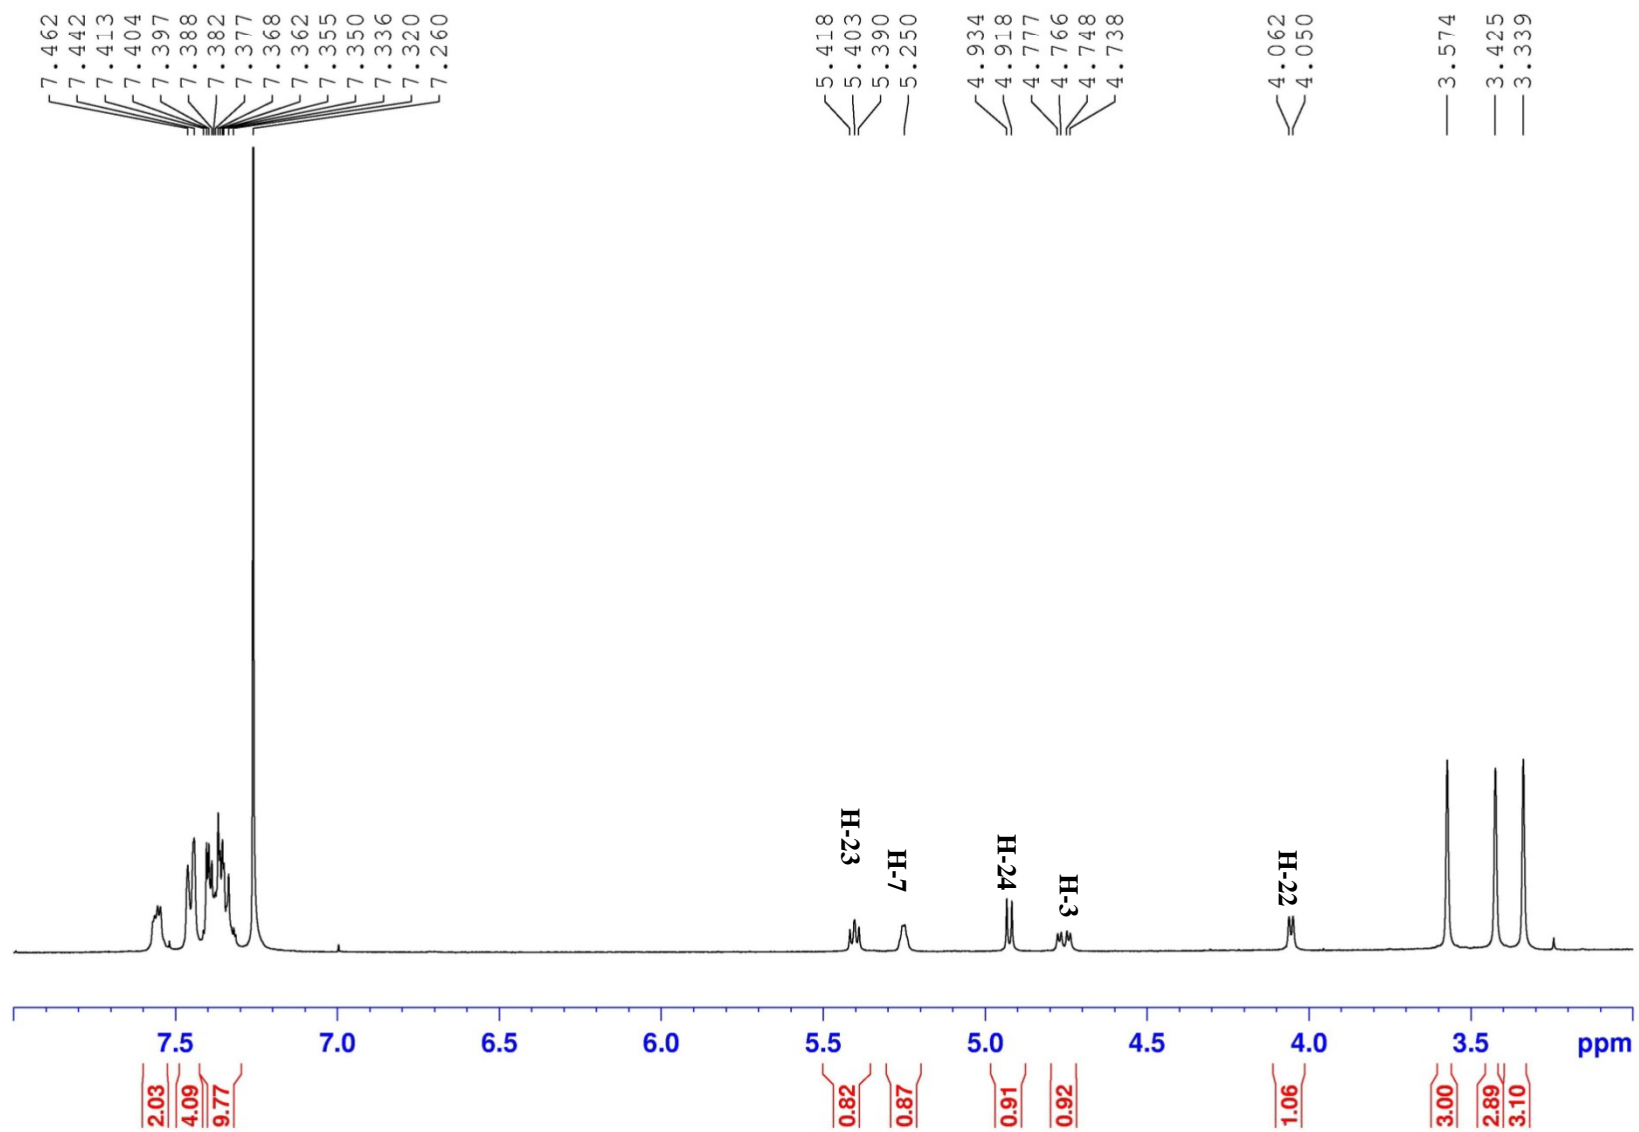

$^1\text{H}$  NMR (400 MHz) spectrum of compound **4r** in  $\text{CDCl}_3$

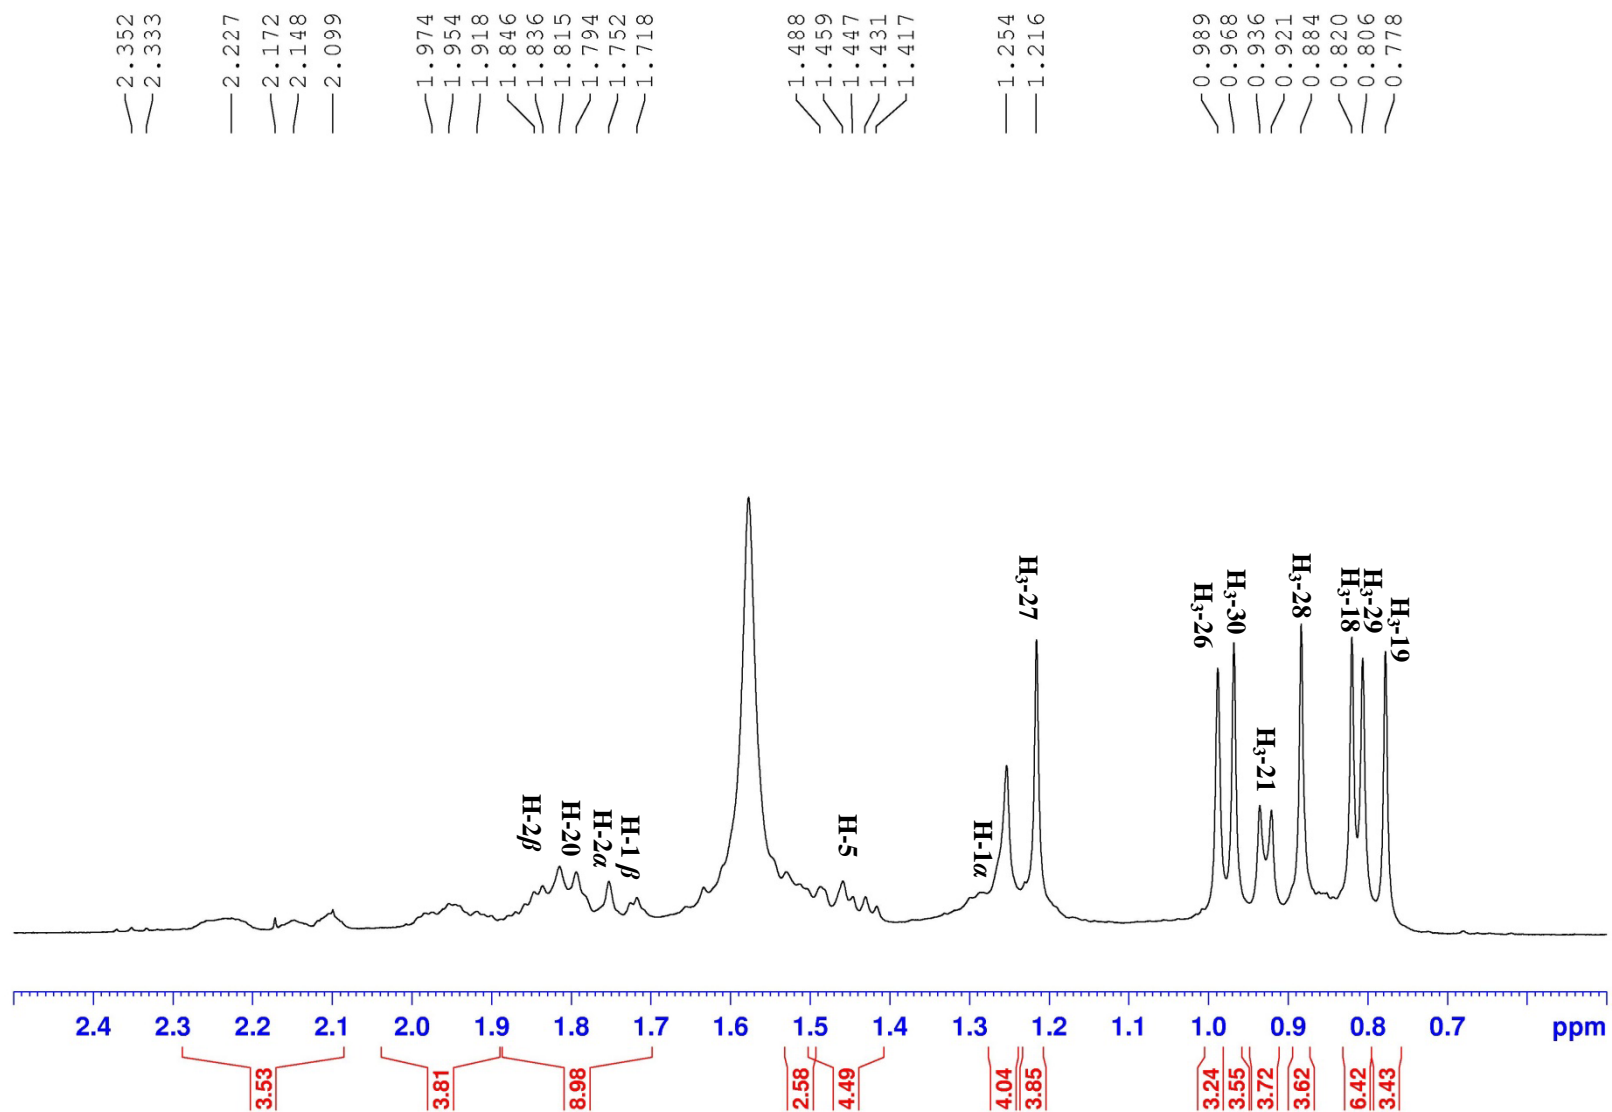

# HR-ESIMS for compound 6s

## Elemental Composition Report

Page 1

### Single Mass Analysis

Tolerance = 10.0 PPM / DBE: min = -1.5, max = 50.0

Element prediction: Off

Number of isotope peaks used for i-FIT = 3

Monoisotopic Mass, Even Electron Ions

66 formula(e) evaluated with 1 results within limits (up to 50 best isotopic matches for each mass)

Elements Used:

C: 0-50 H: 0-100 O: 0-8 F: 0-6

16-S

20181014-5 332 (2.674)

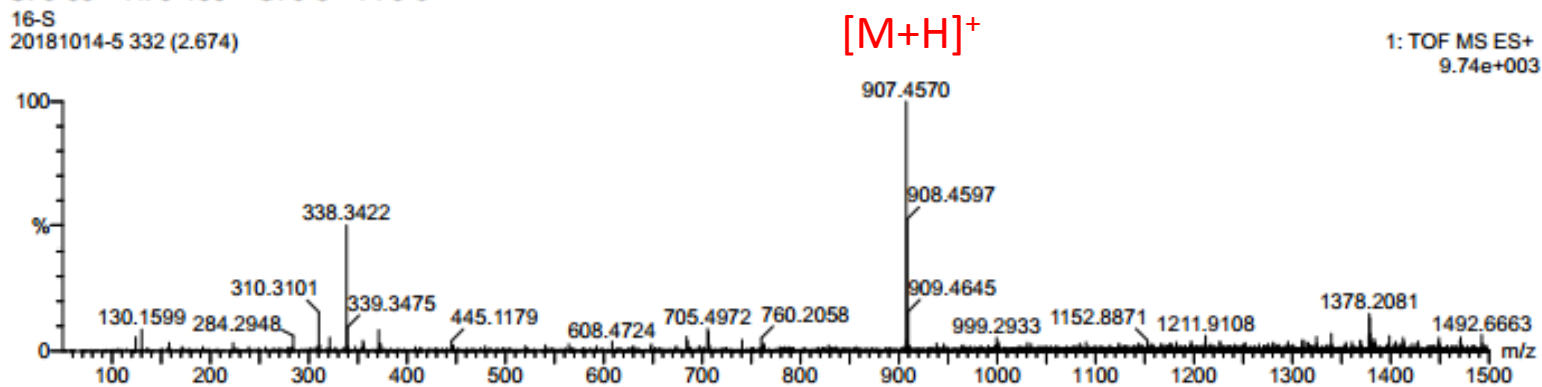

Minimum: -1.5  
Maximum: 2.0 10.0 50.0

| Mass     | Calc. Mass | mDa  | PPM  | DBE  | i-FIT | Norm | Conf (%) | Formula       |
|----------|------------|------|------|------|-------|------|----------|---------------|
| 907.4570 | 907.4584   | -1.4 | -1.5 | 15.5 | 142.9 | n/a  | n/a      | C50 H65 O8 F6 |



$^1\text{H}$  NMR (400 MHz) spectrum of compound **6s** in  $\text{CDCl}_3$

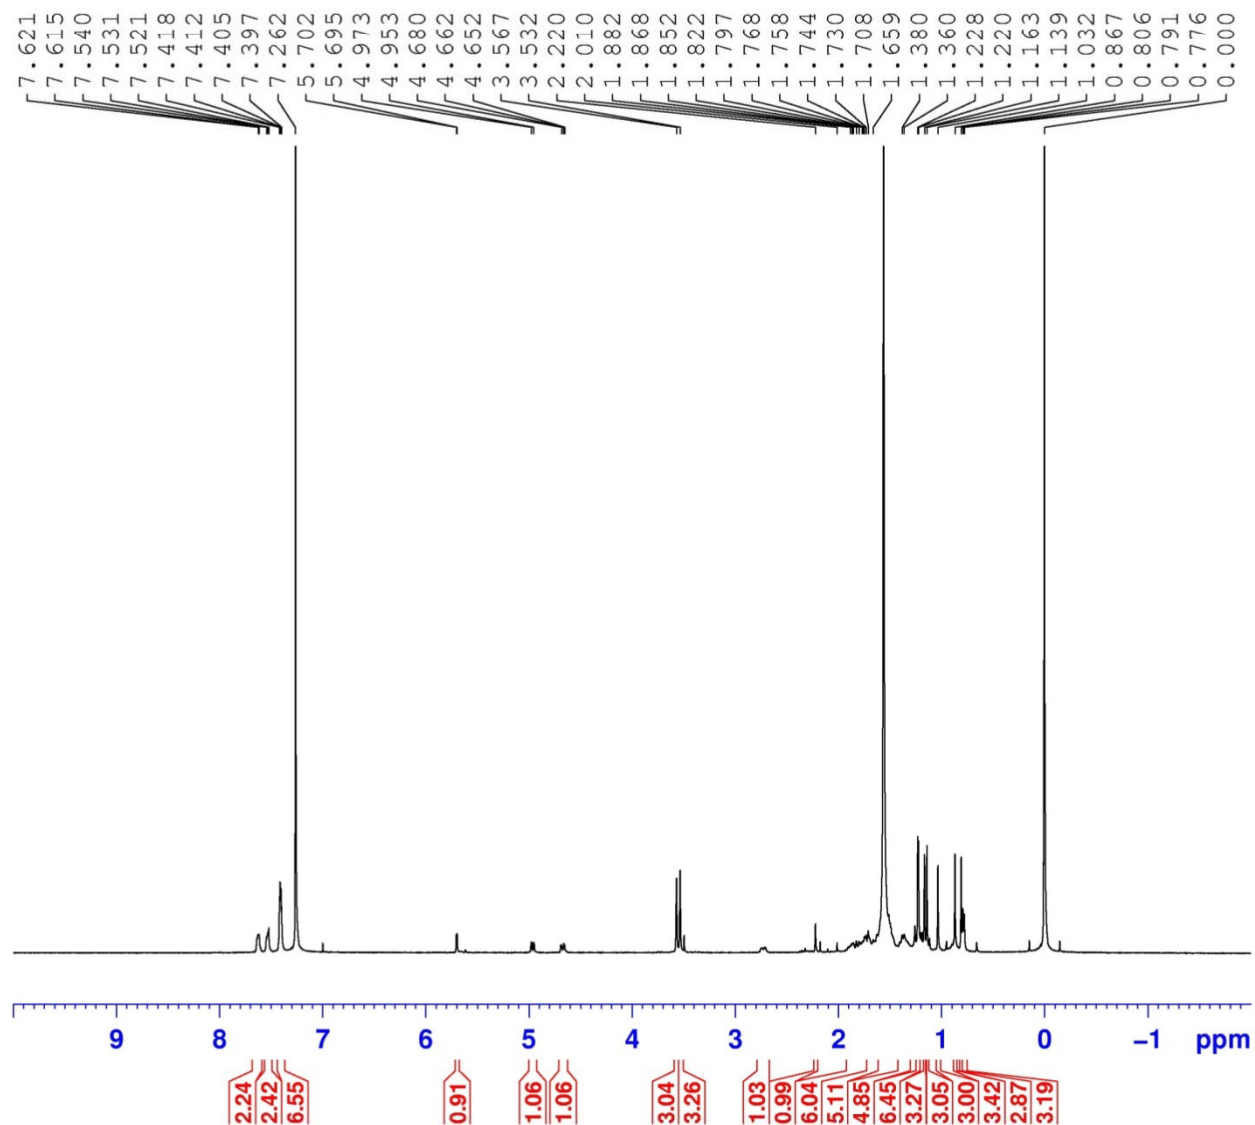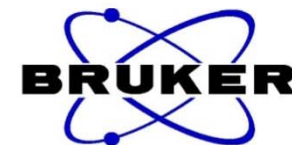

NAME EA-16-S-1  
EXPNO 1  
PROCNO 1  
Date\_ 20170119  
Time 23.04  
INSTRUM spect  
PROBHD 5 mm CPPBBO BB  
PULPROG zg30  
TD 65536  
SOLVENT  $\text{CDCl}_3$   
NS 32  
DS 2  
SWH 8223.685 Hz  
FIDRES 0.125483 Hz  
AQ 3.9846387 sec  
RG 208.5  
DW 60.800 usec  
DE 10.00 usec  
TE 297.0 K  
D1 1.00000000 sec  
TD0 1

===== CHANNEL f1 =====  
SFO1 400.1324710 MHz  
NUC1  $^1\text{H}$   
P1 11.50 usec  
SI 65536  
SF 400.1300091 MHz  
WDW EM  
SSB 0  
LB 0.30 Hz  
GB 0  
PC 1.00

$^1\text{H}$  NMR (400 MHz) spectrum of compound **6s** in  $\text{CDCl}_3$

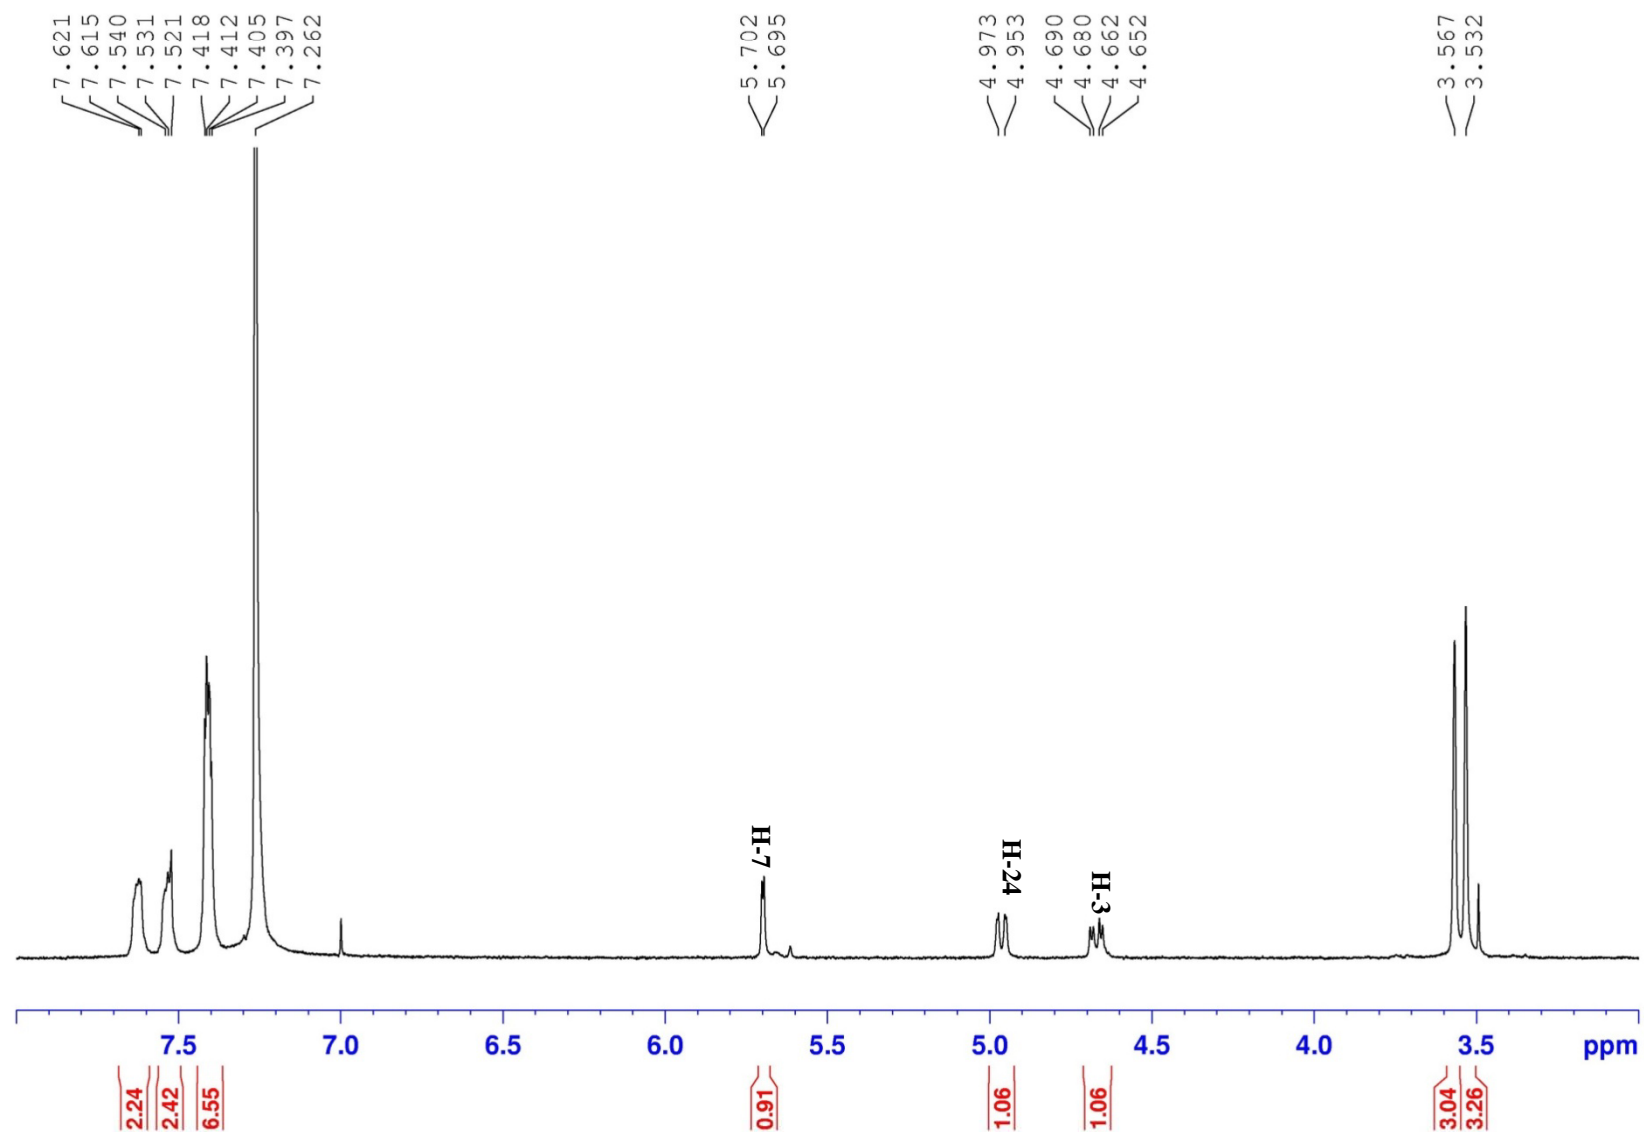

$^1\text{H}$  NMR (400 MHz) spectrum of compound **6s** in  $\text{CDCl}_3$

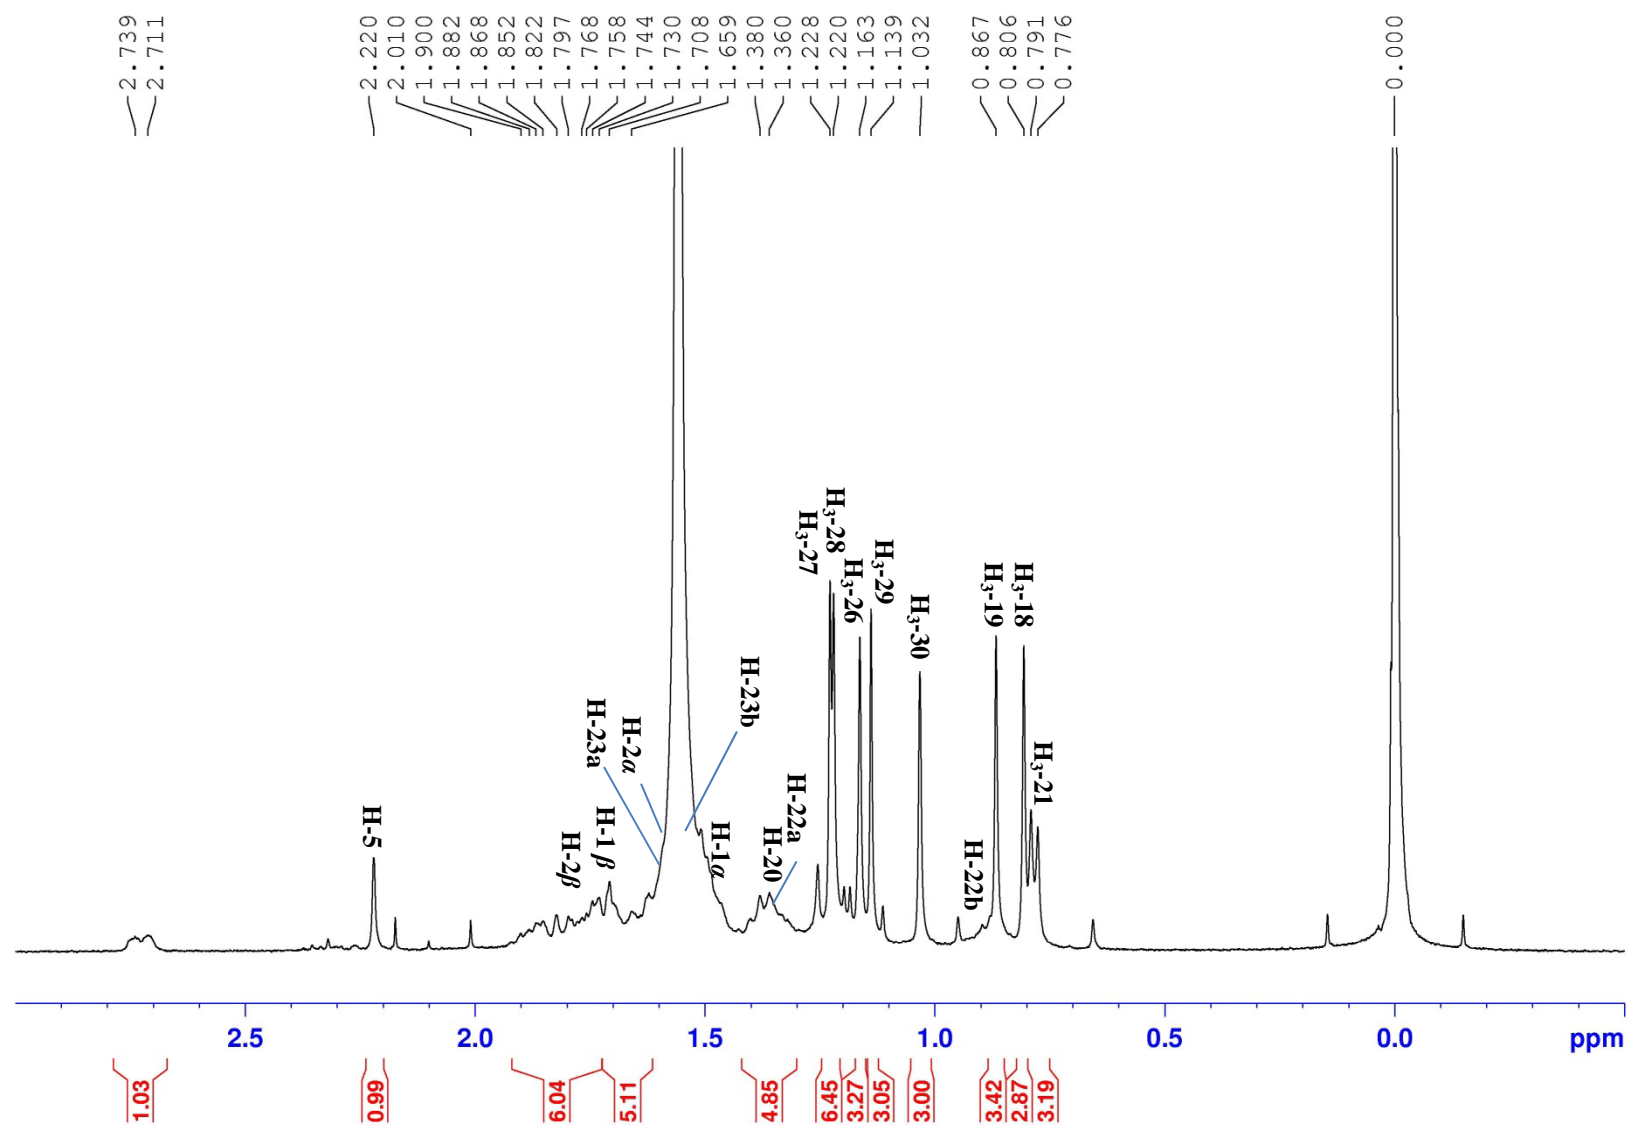

# HR-ESIMS for compound **6r**

## Elemental Composition Report

Page 1

### Single Mass Analysis

Tolerance = 10.0 PPM / DBE: min = -1.5, max = 50.0

Element prediction: Off

Number of isotope peaks used for i-FIT = 3

Monoisotopic Mass, Even Electron Ions

66 formula(e) evaluated with 1 results within limits (up to 50 best isotopic matches for each mass)

Elements Used:

C: 0-50 H: 0-100 O: 0-8 F: 0-6

16-R

20181014-4 331 (2.666)

1: TOF MS ES+  
1.13e+004

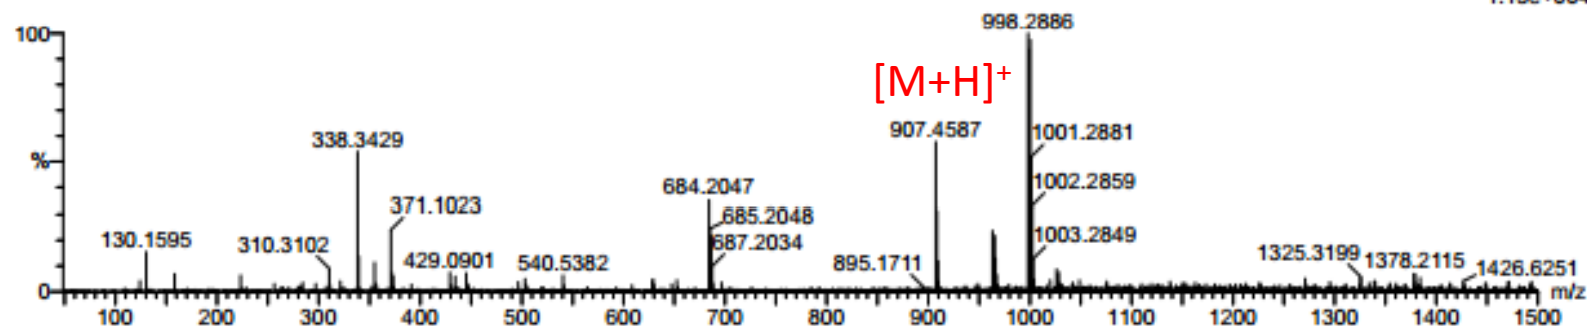

Minimum: -1.5  
Maximum: 2.0 10.0 50.0

| Mass     | Calc. Mass | mDa | PPM | DBE  | i-FIT | Norm | Conf (%) | Formula       |
|----------|------------|-----|-----|------|-------|------|----------|---------------|
| 907.4587 | 907.4584   | 0.3 | 0.3 | 15.5 | 157.4 | n/a  | n/a      | C50 H65 O8 F6 |

$^1\text{H}$  NMR (400 MHz) spectrum of compound **6r** in  $\text{CDCl}_3$

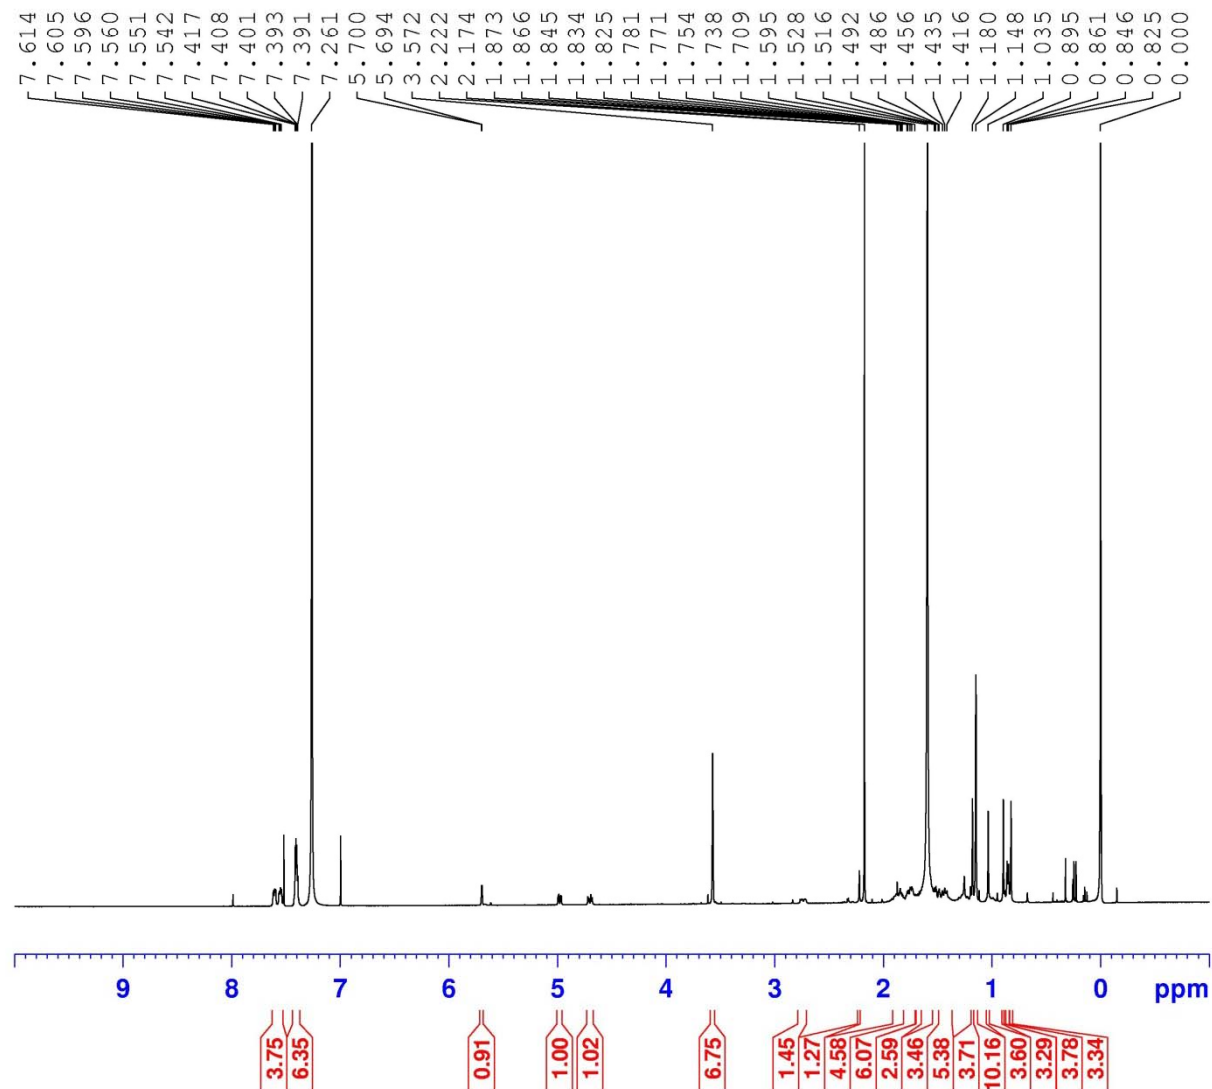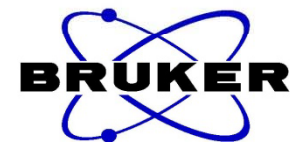

```

NAME      EA-16-R-MOSHER-2
EXPNO     1
PROCNO    1
Date_     20170310
Time      5.07
INSTRUM   spect
PROBHD    5 mm CPPBBO BB
PULPROG   zg30
TD        65536
SOLVENT   CDCl3
NS        128
DS        2
SWH       8223.685 Hz
FIDRES    0.125483 Hz
AQ        3.9846387 sec
RG        208.5
DW        60.800 usec
DE        10.00 usec
TE        297.0 K
D1        1.00000000 sec
TD0       1

===== CHANNEL f1 =====
SFO1      400.1324710 MHz
NUC1      1H
P1        11.50 usec
SI        65536
SF        400.1300091 MHz
WDW       EM
SSB       0
LB        0.30 Hz
GB        0
PC        1.00
    
```

$^1\text{H}$  NMR (400 MHz) spectrum of compound **6r** in  $\text{CDCl}_3$

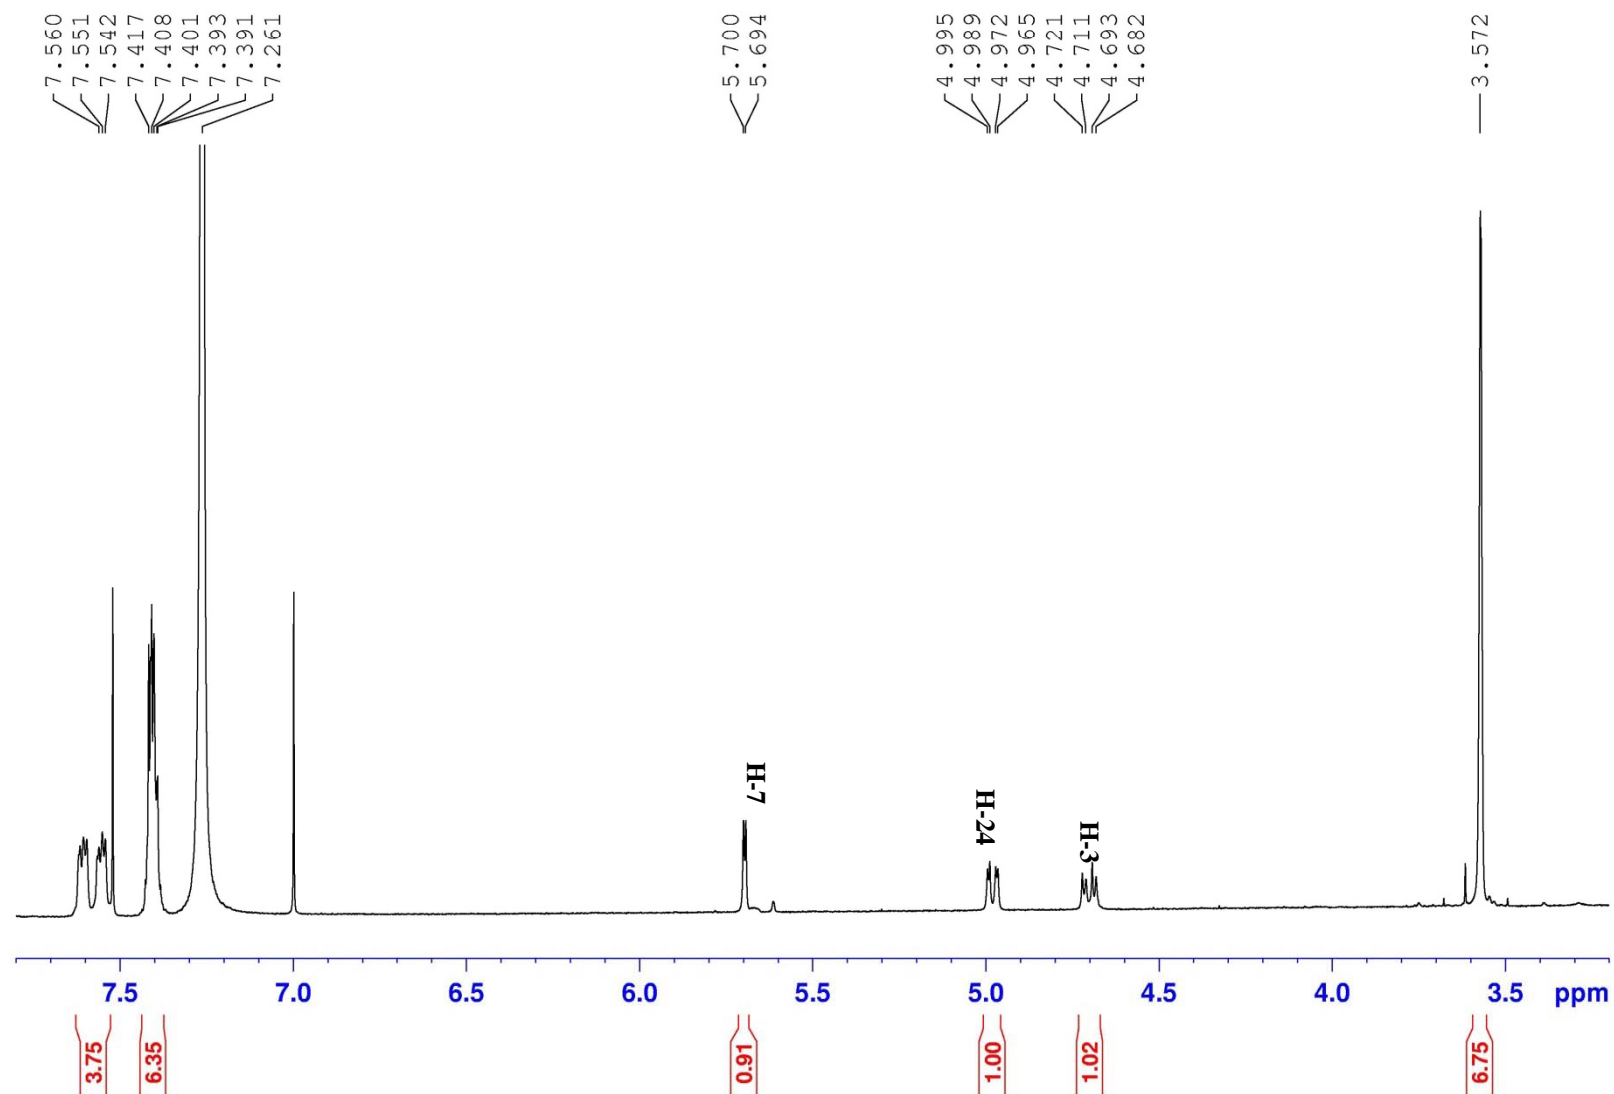

$^1\text{H}$  NMR (400 MHz) spectrum of compound **6r** in  $\text{CDCl}_3$

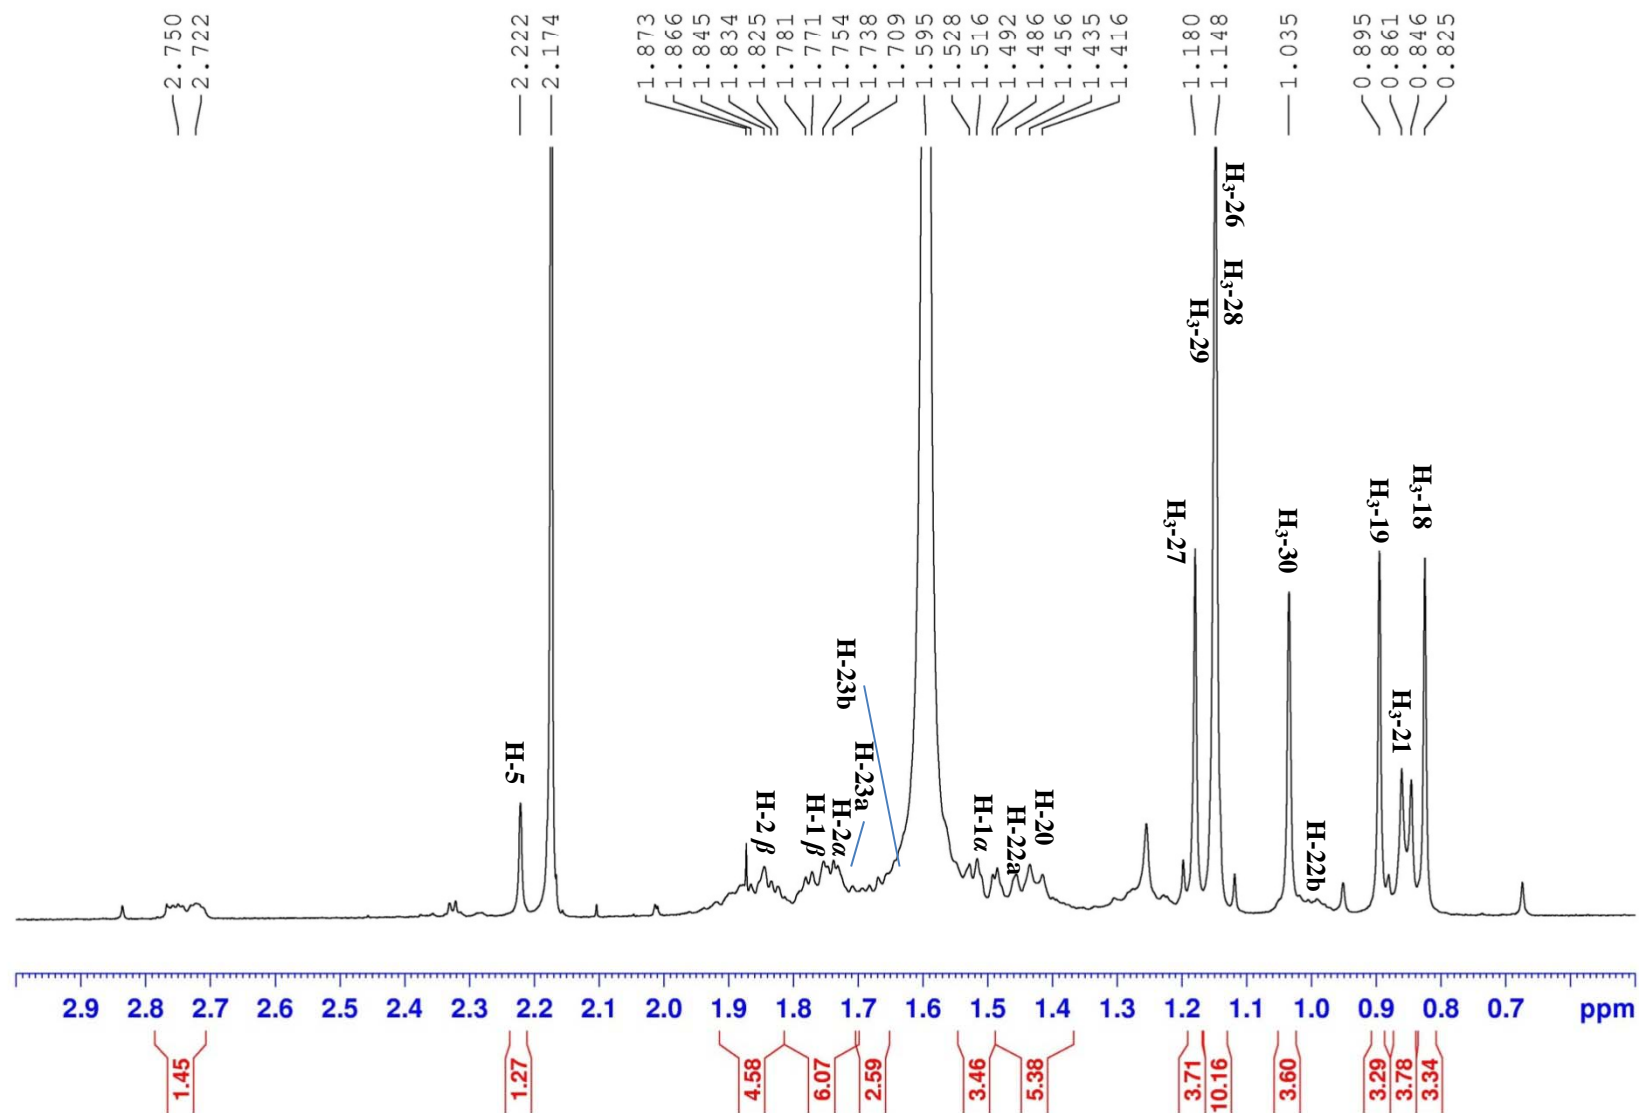

# HR-ESIMS for compound **7s**

## Elemental Composition Report

Page 1

### Single Mass Analysis

Tolerance = 10.0 PPM / DBE: min = -1.5, max = 50.0

Element prediction: Off

Number of isotope peaks used for i-FIT = 3

Monoisotopic Mass, Even Electron Ions

66 formula(e) evaluated with 1 results within limits (up to 50 best isotopic matches for each mass)

Elements Used:

C: 0-50 H: 0-100 O: 0-8 F: 0-6

17-S

20181014-7 339 (2.726)

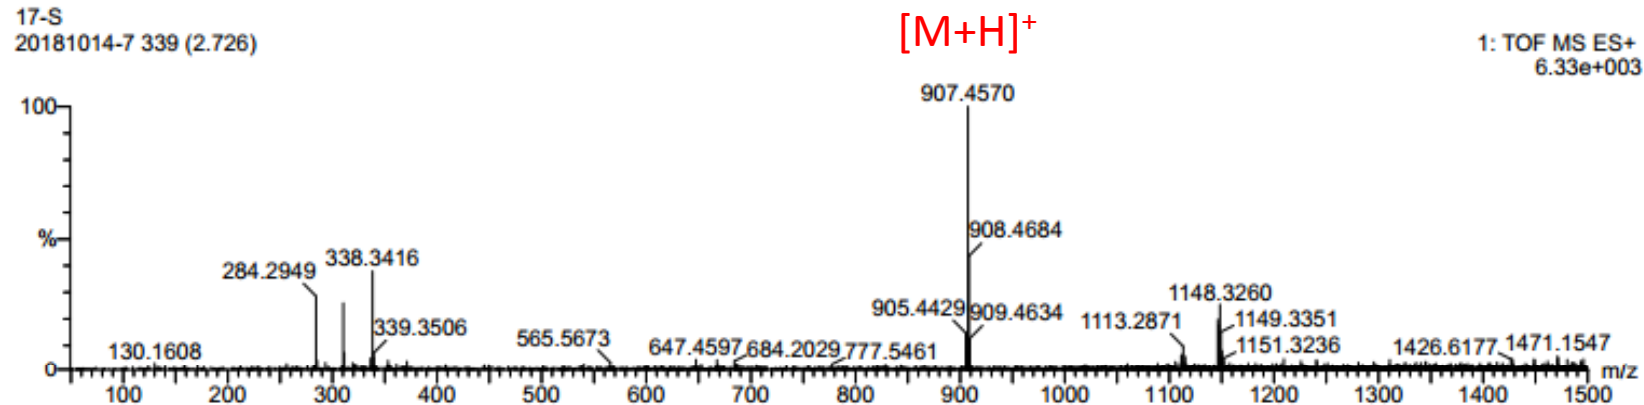

Minimum: -1.5  
Maximum: 2.0 10.0 50.0

| Mass     | Calc. Mass | mDa  | PPM  | DBE  | i-FIT | Norm | Conf(%) | Formula       |
|----------|------------|------|------|------|-------|------|---------|---------------|
| 907.4570 | 907.4584   | -1.4 | -1.5 | 15.5 | 120.6 | n/a  | n/a     | C50 H65 O8 F6 |



# $^1\text{H}$ NMR (400 MHz) spectrum of compound **7s** in $\text{CDCl}_3$

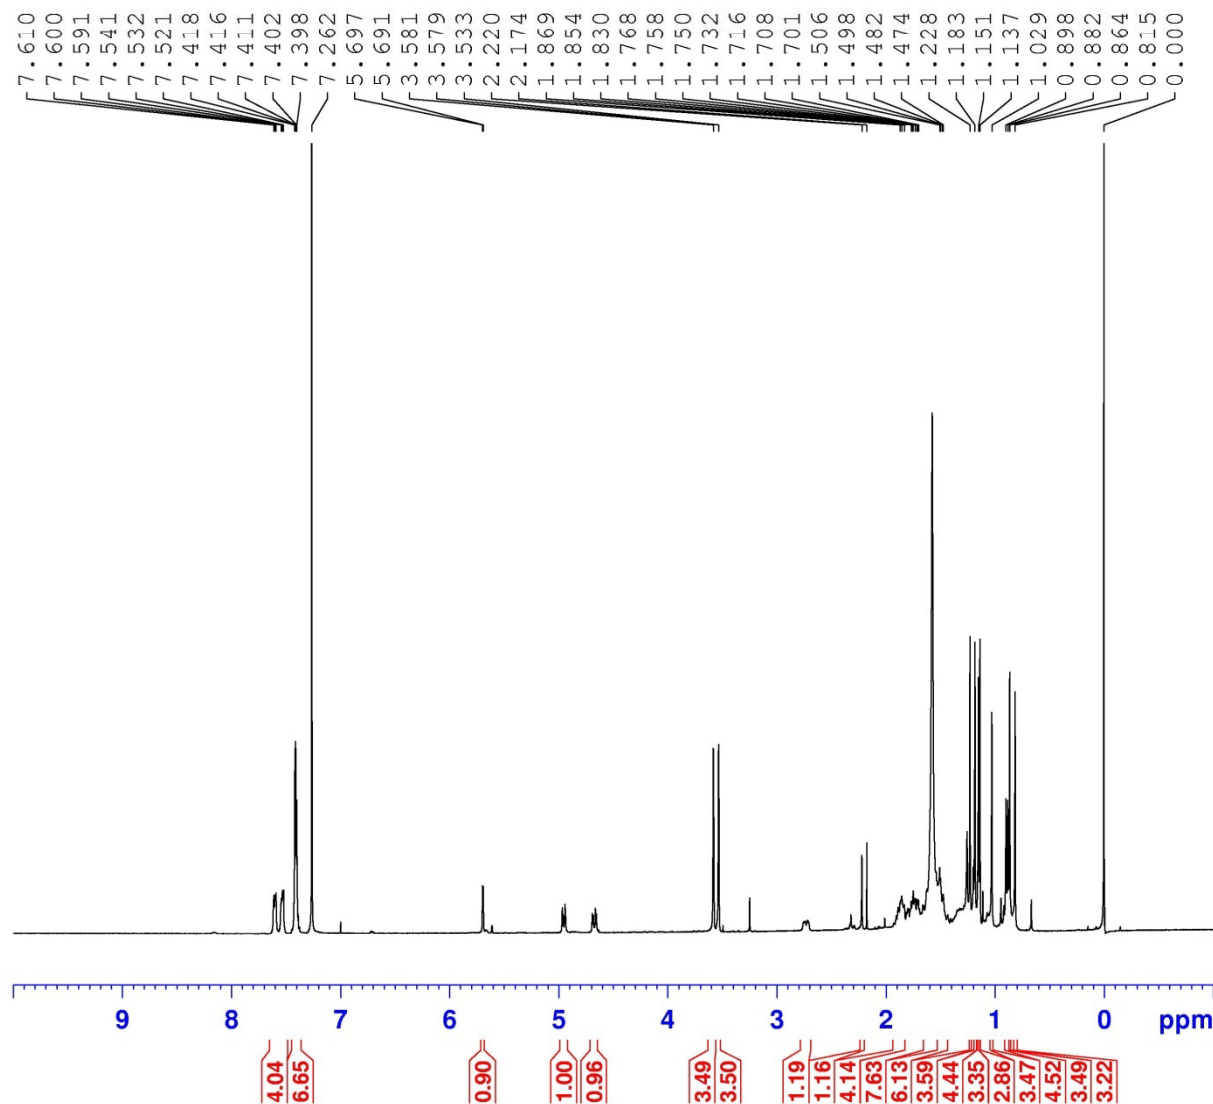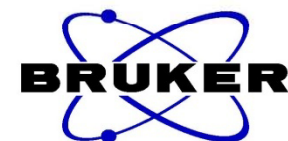

```

NAME      EA-17-S-MOSHER
EXPNO     1
PROCNO    1
Date_     20180714
Time      21.56
INSTRUM   spect
PROBHD    5 mm CPPBBO BB
PULPROG   zg30
TD        65536
SOLVENT   CDCl3
NS        16
DS        2
SWH       8223.685 Hz
FIDRES    0.125483 Hz
AQ        3.9846387 sec
RG        208.5
DW        60.800 usec
DE        10.00 usec
TE        297.0 K
D1        1.00000000 sec
TD0       1
    
```

```

===== CHANNEL f1 =====
SFO1     400.1324710 MHz
NUC1     1H
P1       11.50 usec
SI       65536
SF       400.1300089 MHz
WDW      EM
SSB      0
LB       0.30 Hz
GB       0
PC       1.00
    
```

$^1\text{H}$  NMR (400 MHz) spectrum of compound **7s** in  $\text{CDCl}_3$

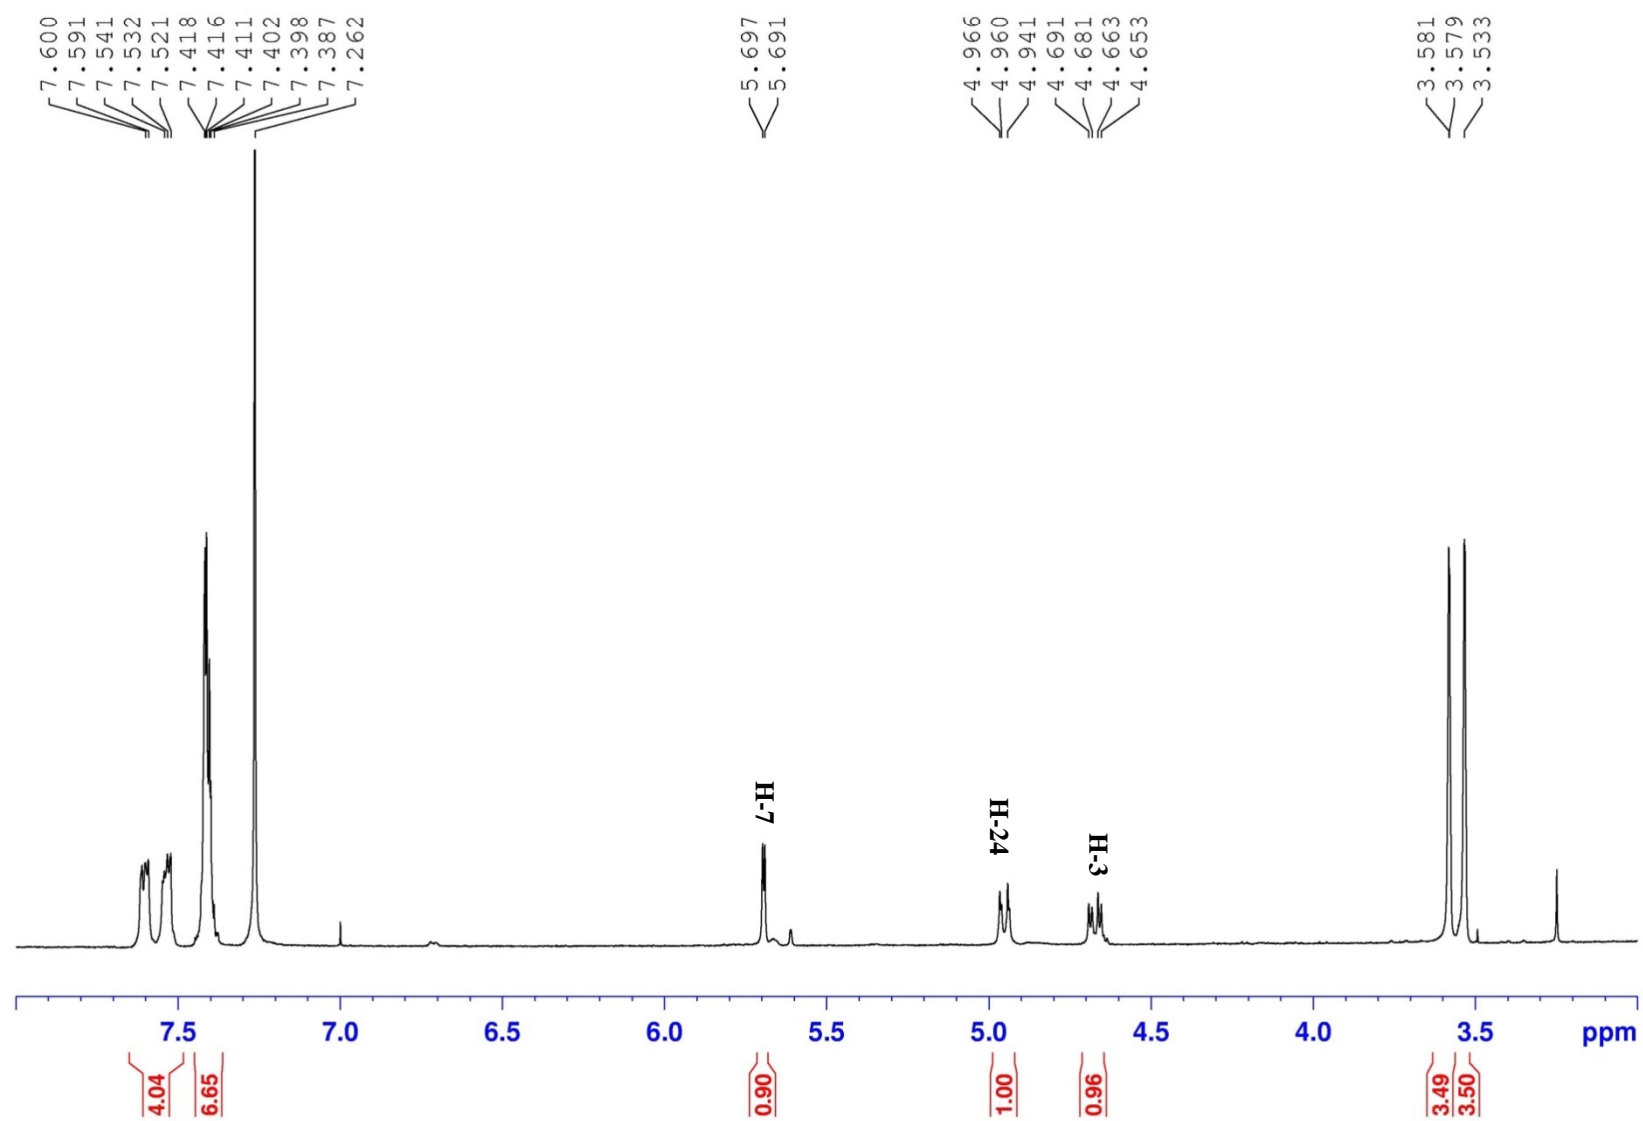

<sup>1</sup>H NMR spectrum of compound **1** in CDCl<sub>3</sub>. The spectrum shows peaks from 0.7 to 2.9 ppm. Key peaks are labeled: H-5 at ~2.2 ppm, H-2α at ~1.65 ppm, H-1β at ~1.75 ppm, H-2β at ~1.8 ppm, H-23a at ~1.85 ppm, H-23b at ~1.45 ppm, H-1α at ~1.5 ppm, H-20 at ~1.3 ppm, H-22b at ~1.05 ppm, H-30 at ~1.0 ppm, H-29 at ~1.15 ppm, H-27 at ~1.2 ppm, H-28 at ~1.25 ppm, H-31 at ~0.9 ppm, H-18 at ~0.85 ppm, and H-21 at ~0.8 ppm. Integration values are shown below the baseline: 1.19, 1.16, 1.14, 1.13, 1.12, 1.11, 1.10, 1.09, 1.08, 1.07, 1.06, 1.05, 1.04, 1.03, 1.02, 1.01, 1.00, 0.99, 0.98, 0.97, 0.96, 0.95, 0.94, 0.93, 0.92, 0.91, 0.90, 0.89, 0.88, 0.87, 0.86, 0.85, 0.84, 0.83, 0.82, 0.81, 0.80, 0.79, 0.78, 0.77, 0.76, 0.75, 0.74, 0.73, 0.72, 0.71, 0.70, 0.69, 0.68, 0.67, 0.66, 0.65, 0.64, 0.63, 0.62, 0.61, 0.60, 0.59, 0.58, 0.57, 0.56, 0.55, 0.54, 0.53, 0.52, 0.51, 0.50, 0.49, 0.48, 0.47, 0.46, 0.45, 0.44, 0.43, 0.42, 0.41, 0.40, 0.39, 0.38, 0.37, 0.36, 0.35, 0.34, 0.33, 0.32, 0.31, 0.30, 0.29, 0.28, 0.27, 0.26, 0.25, 0.24, 0.23, 0.22, 0.21, 0.20, 0.19, 0.18, 0.17, 0.16, 0.15, 0.14, 0.13, 0.12, 0.11, 0.10, 0.09, 0.08, 0.07, 0.06, 0.05, 0.04, 0.03, 0.02, 0.01, 0.00.

# HR-ESIMS for compound **7r**

## Elemental Composition Report

Page 1

### Single Mass Analysis

Tolerance = 10.0 PPM / DBE: min = -1.5, max = 50.0

Element prediction: Off

Number of isotope peaks used for i-FIT = 3

Monoisotopic Mass, Even Electron Ions

66 formula(e) evaluated with 1 results within limits (up to 50 best isotopic matches for each mass)

Elements Used:

C: 0-50 H: 0-100 O: 0-8 F: 0-6

17-R

20181014-6 328 (2.644)

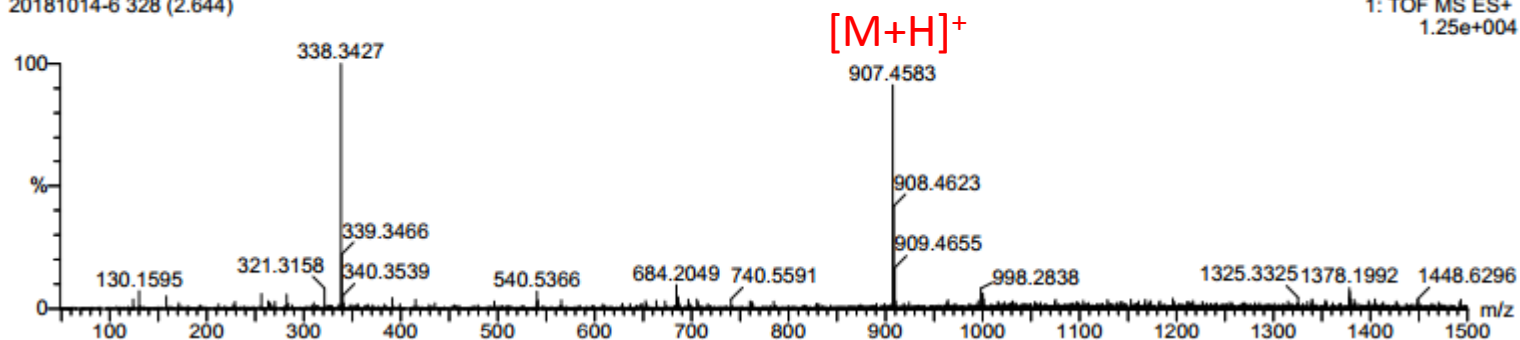

Minimum: -1.5  
Maximum: 2.0 10.0 50.0

| Mass     | Calc. Mass | mDa  | PPM  | DBE  | i-FIT | Norm | Conf (%) | Formula       |
|----------|------------|------|------|------|-------|------|----------|---------------|
| 907.4583 | 907.4584   | -0.1 | -0.1 | 15.5 | 191.0 | n/a  | n/a      | C50 H65 O8 F6 |

$^1\text{H}$  NMR (400 MHz) spectrum of compound **7r** in  $\text{CDCl}_3$

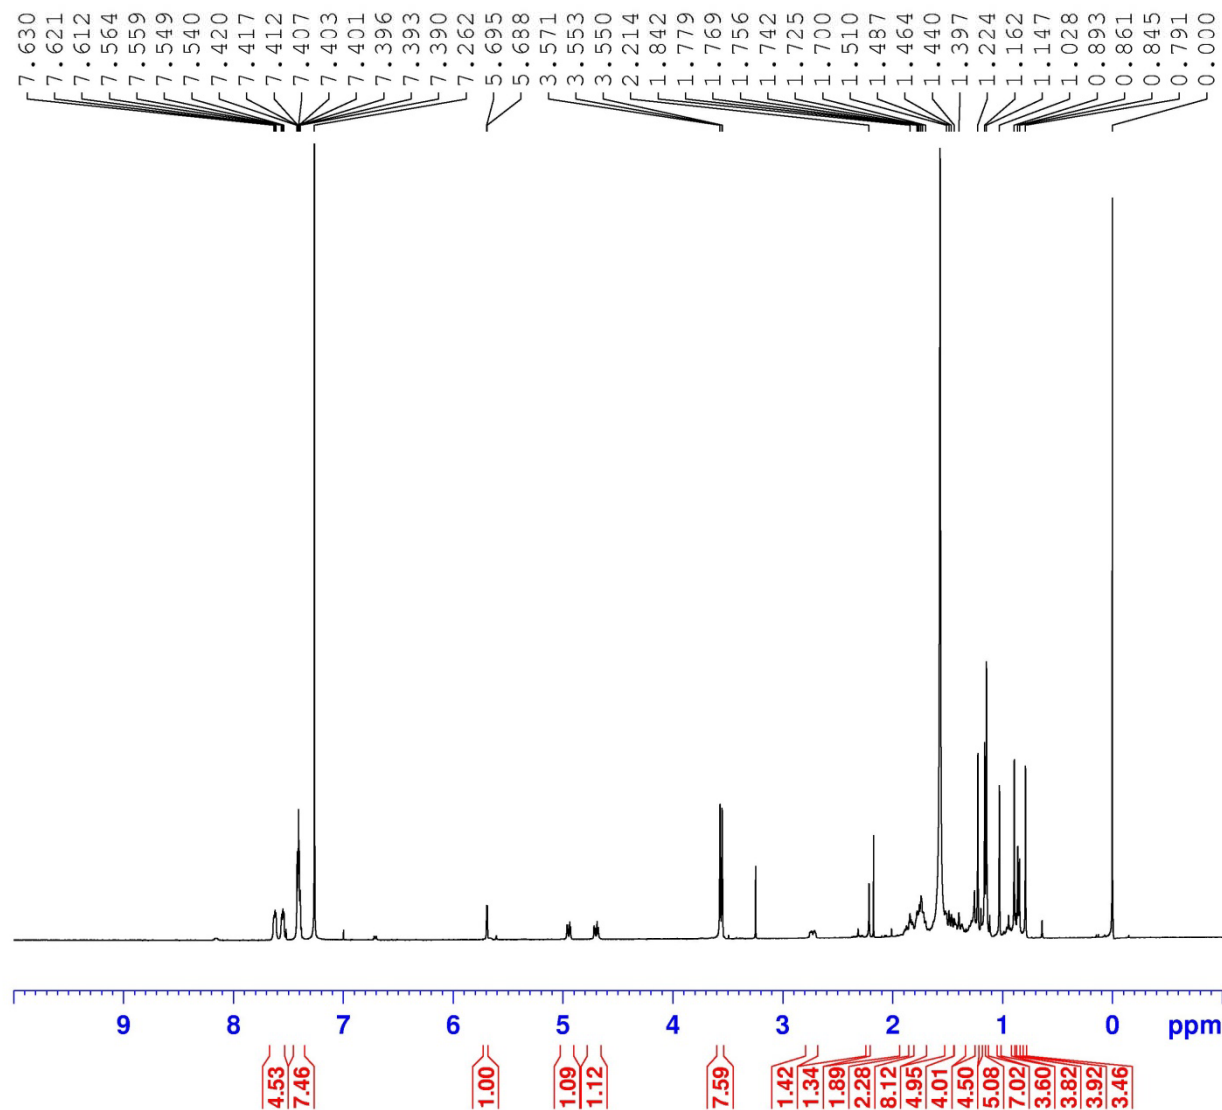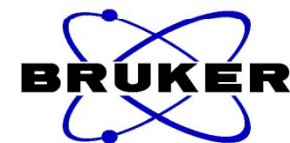

```

NAME      EA-17-R-MOSHER
EXPNO     1
PROCNO    1
Date_     20180716
Time      10.19
INSTRUM   spect
PROBHD    5 mm CPPBBO BB
PULPROG   zg30
TD        65536
SOLVENT   CDCl3
NS        16
DS        2
SWH       8223.685 Hz
FIDRES    0.125483 Hz
AQ        3.9846387 sec
RG        208.5
DW        60.800 usec
DE        10.00 usec
TE        297.0 K
D1        1.00000000 sec
TD0       1
  
```

```

===== CHANNEL f1 =====
SFO1      400.1324710 MHz
NUC1      1H
P1        11.50 usec
SI        65536
SF        400.1300089 MHz
WDW       EM
SSB       0
LB        0.30 Hz
GB        0
PC        1.00
  
```

$^1\text{H}$  NMR (400 MHz) spectrum of compound **7r** in  $\text{CDCl}_3$

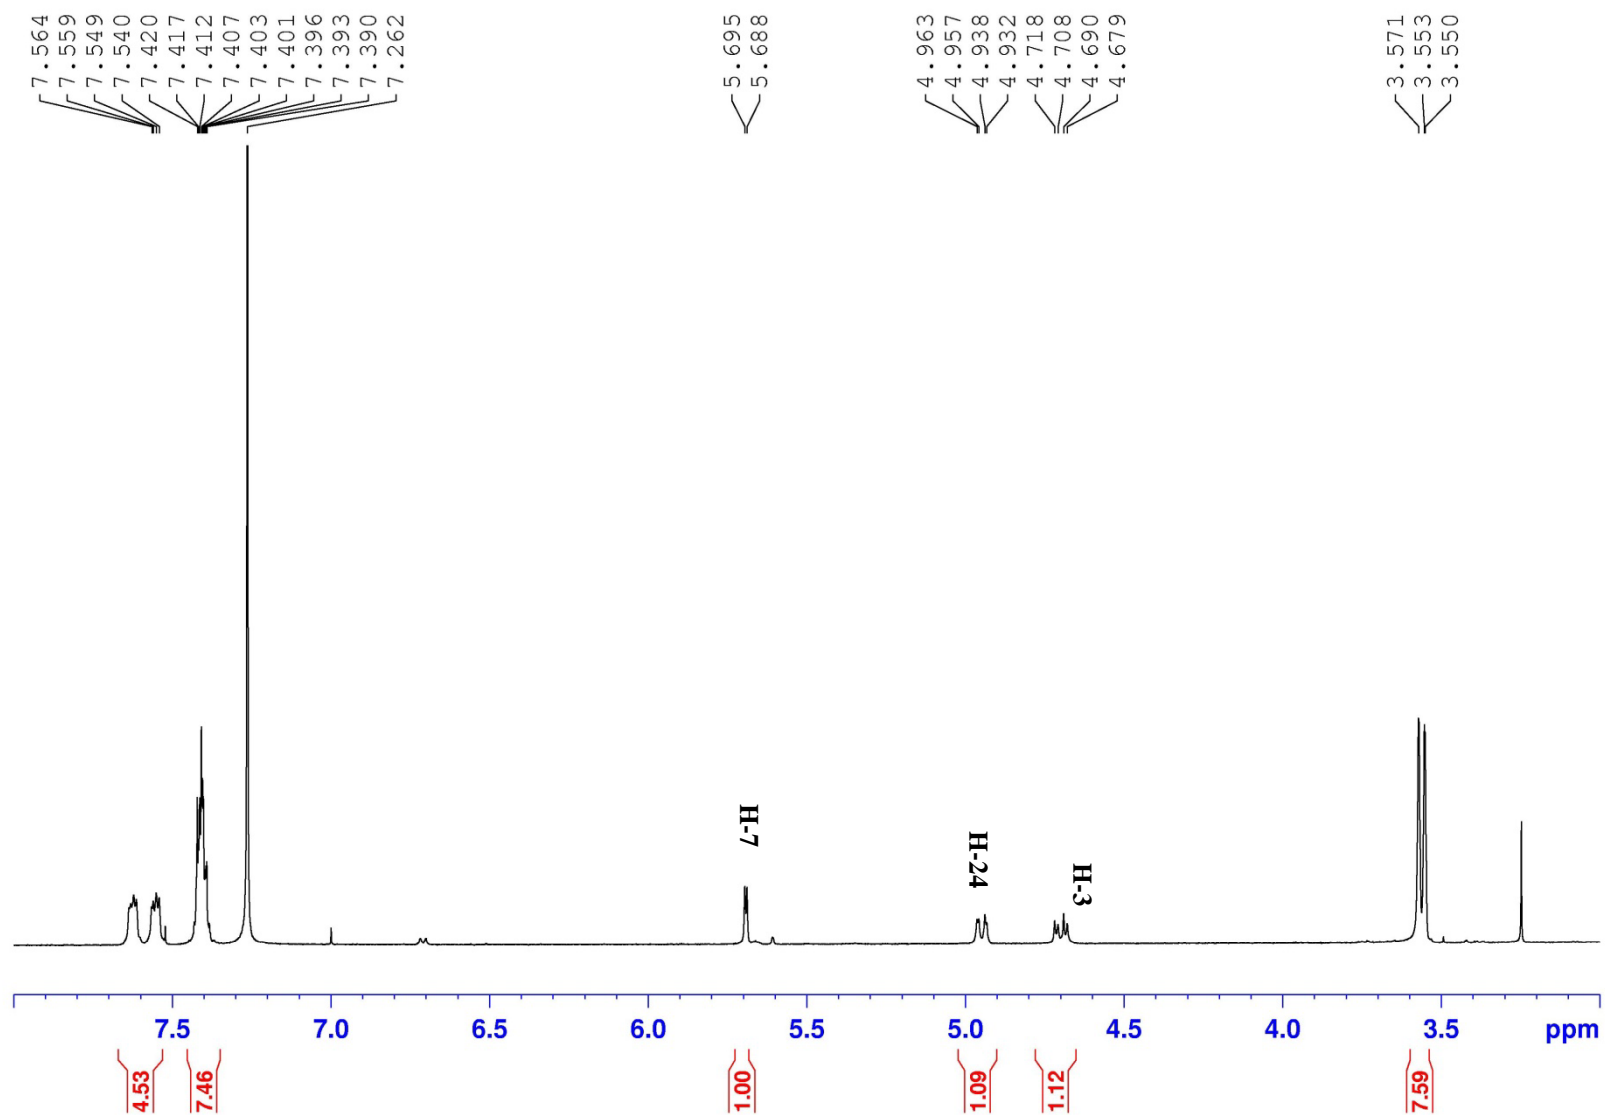

$^1\text{H}$  NMR (400 MHz) spectrum of compound **7r** in  $\text{CDCl}_3$

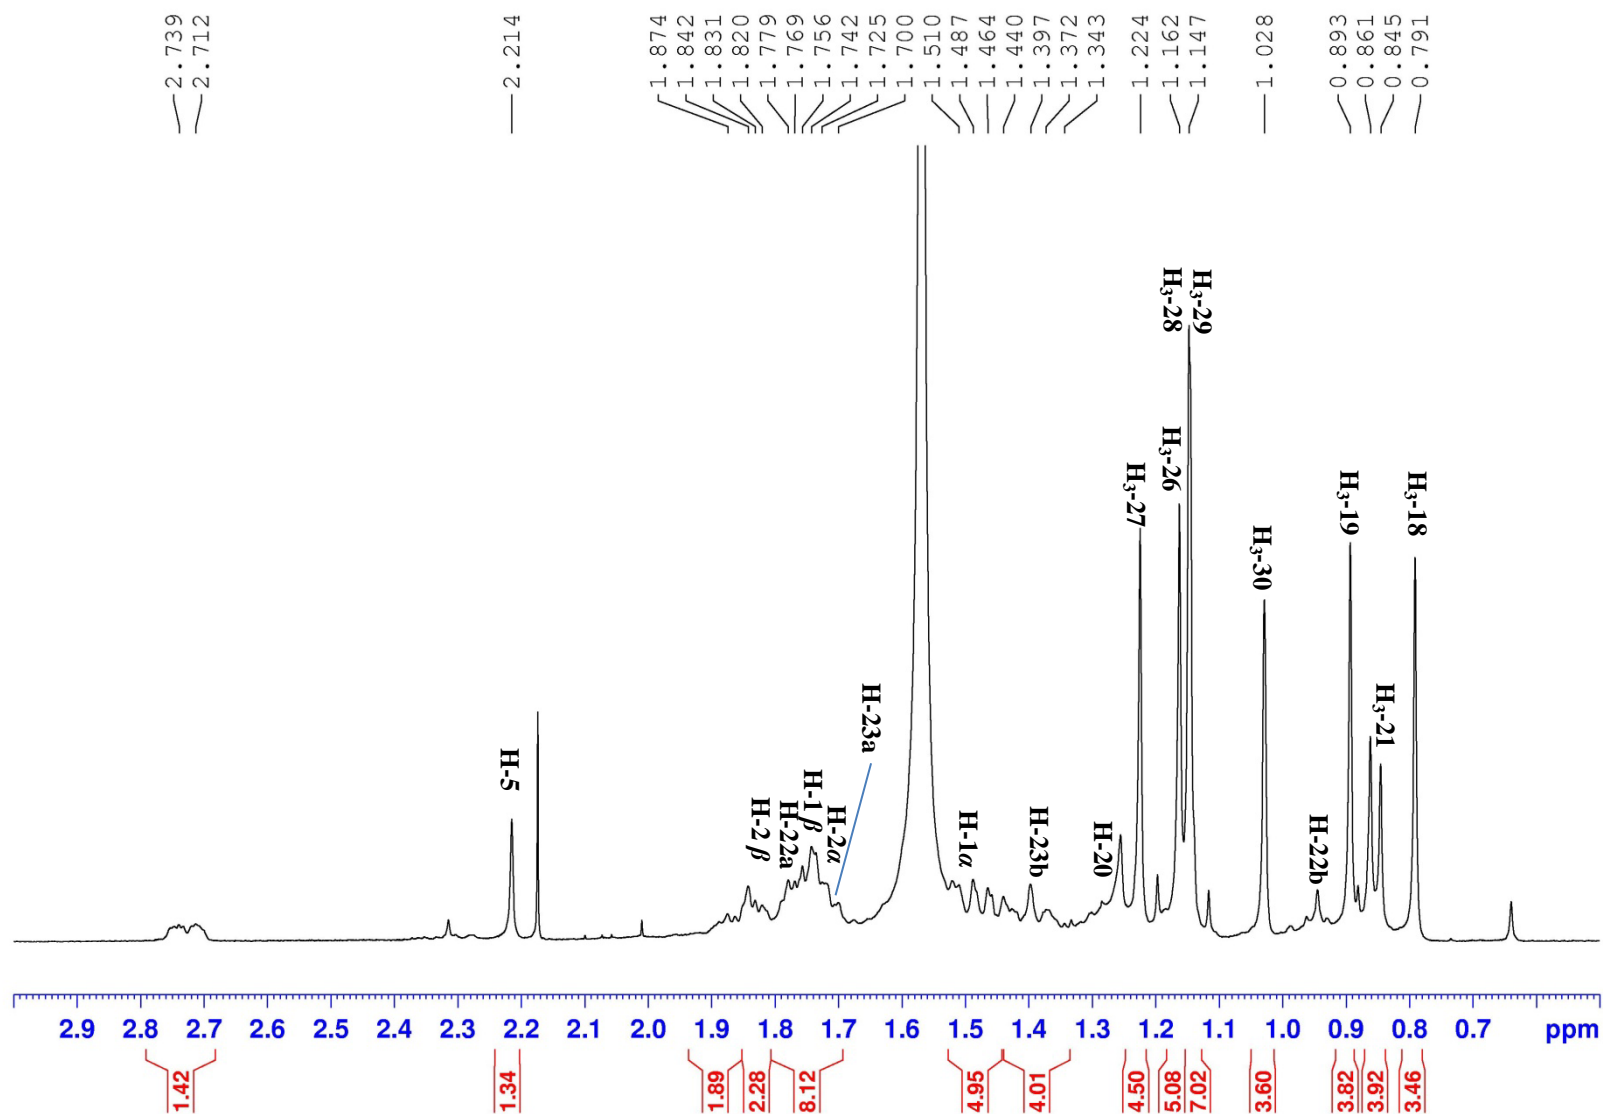

Supplement: s1 [file s1]
